# Supplementary material for: FRUITFULL Is a Repressor of Apical Hook Opening in Arabidopsis thaliana
Source: MDPI journal article supplement (doi:10.3390/ijms21176438), 2020-09-03
Supplement: s1 [file s1]

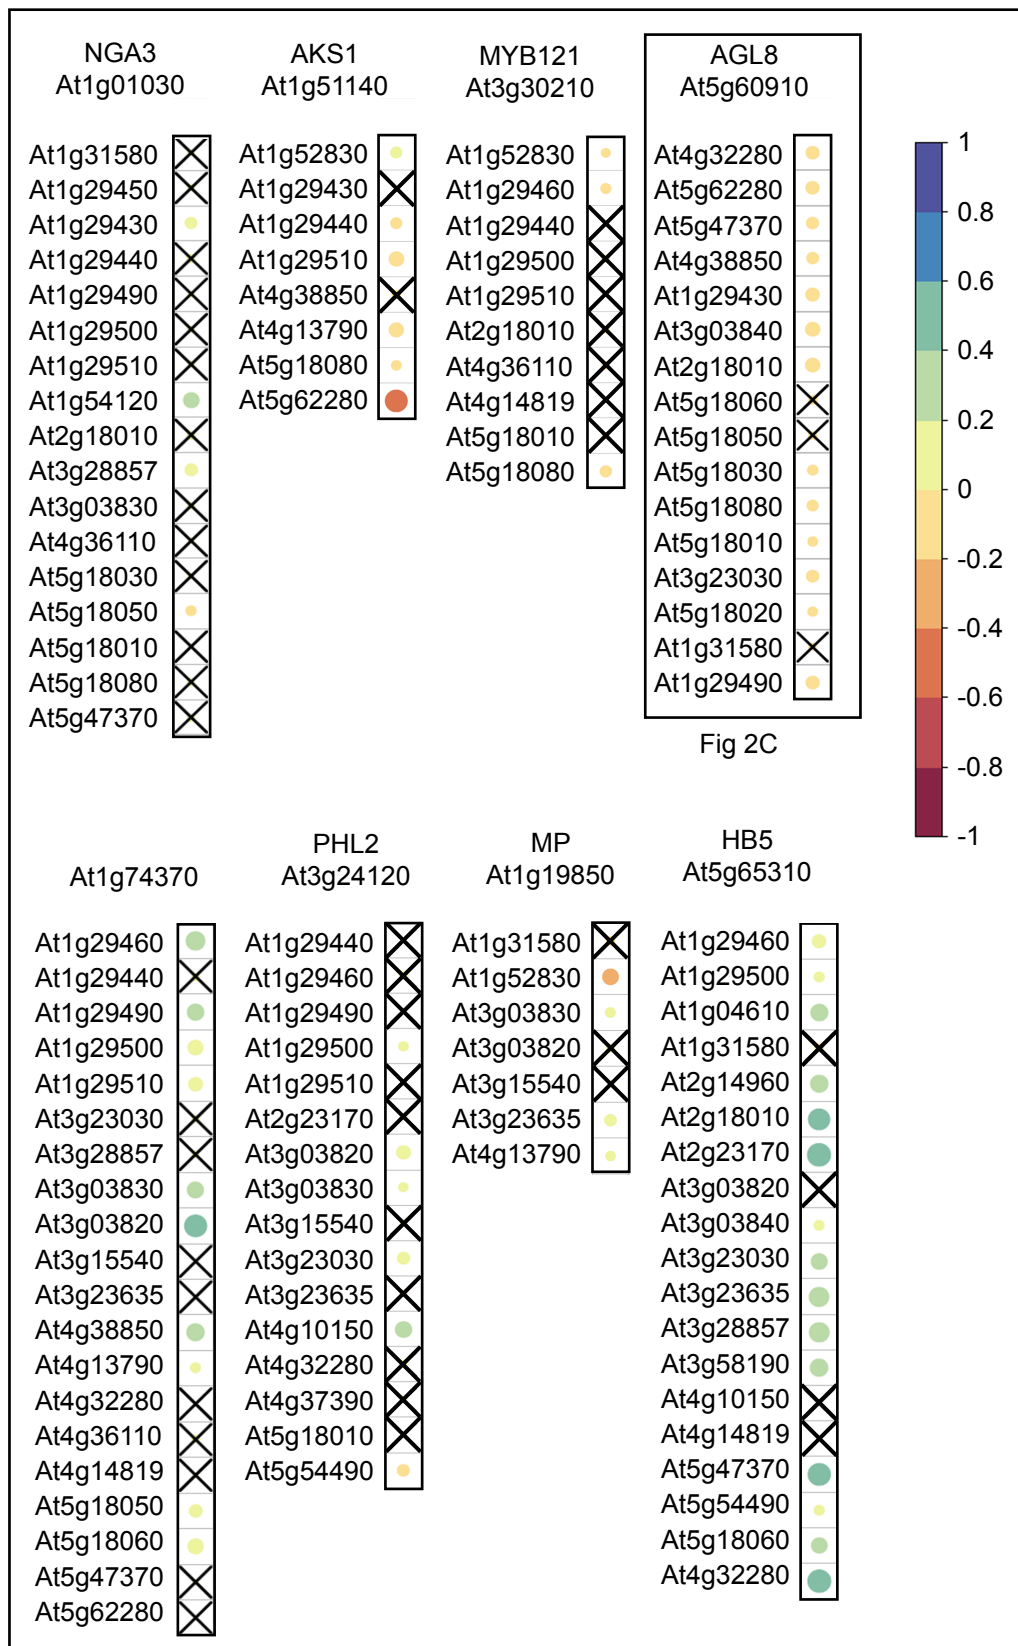

## Supplemental Figure 2

Diagrams represents the correlation between the expression of the transcription factors identified by SeqEnrich (Becker et al., 2017) and their target genes in 727 *Arabidopsis thaliana* natural variations (Kawakatsu et al., 2017). Colour code (red to blue) depicts highly negative to highly positive Pearson correlation coefficients. Non-significant ( $p > 0.05$ ) correlations are indicated with a cross.
