# Supplementary material for: FRUITFULL Is a Repressor of Apical Hook Opening in Arabidopsis thaliana
Source: MDPI journal article supplement (doi:10.3390/ijms21176438), 2020-09-03
Supplement: s1 [file s1]

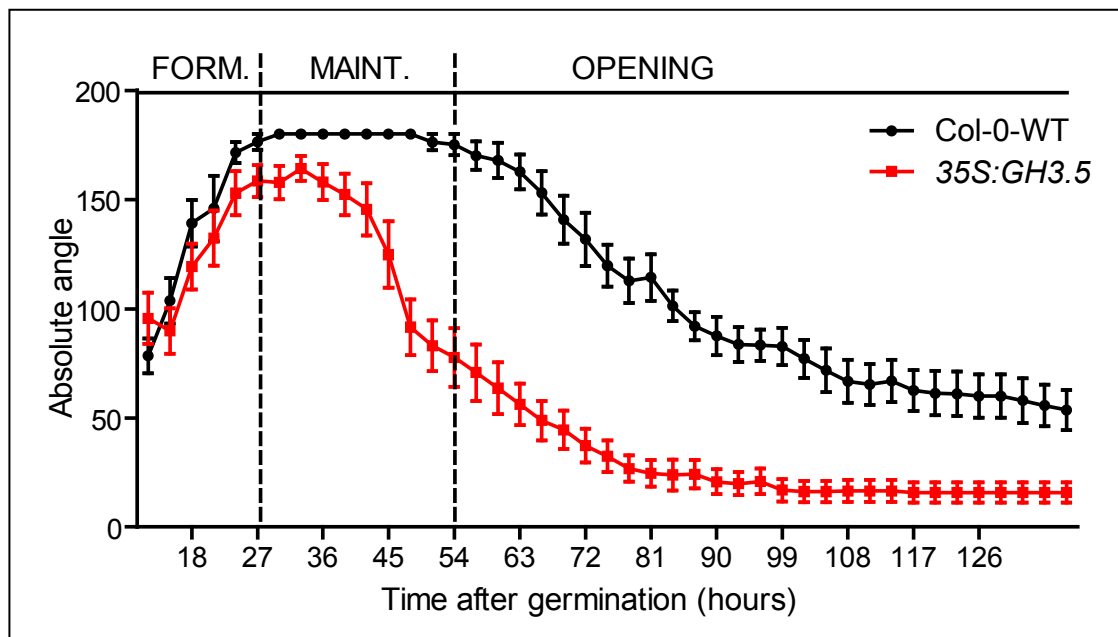

### Supplemental Figure 1

Kinetics of apical hook development in Col-0-WT and *35S:GH3.5* dark grown seedlings from germination onwards.  
 Abbreviations: FORM: formation phase; MAINT: maintenance phase; OPENING: opening phase.
