# Supplementary material for: FRUITFULL Is a Repressor of Apical Hook Opening in Arabidopsis thaliana
Source: Int J Mol Sci. 2020 Sep 3;21(17):6438. doi: 10.3390/ijms21176438 (PMC7504503; doi:10.3390/ijms21176438)
Supplement: Supplementary file 1 [file ijms-21-06438-s001.zip]

Archive with 15 entries (12 files):
- supplemental files/
- supplemental files/.DS_Store
- __MACOSX/
- __MACOSX/supplemental files/
- __MACOSX/supplemental files/._.DS_Store
- supplemental files/Sup Figure_2.pdf
- __MACOSX/supplemental files/._Sup Figure_2.pdf
- supplemental files/Sup Figure_1.pdf
- __MACOSX/supplemental files/._Sup Figure_1.pdf
- supplemental files/SUP file 2_IAAmock vs lightdark.xlsx
- __MACOSX/supplemental files/._SUP file 2_IAAmock vs lightdark.xlsx
- supplemental files/SUP file 3_expression in accessions.xlsx
- supplemental files/SUP file 4  raw data kinetics.xlsx
- __MACOSX/supplemental files/._SUP file 4  raw data kinetics.xlsx
- supplemental files/SUP file 1_WT_MOCKvsWT_IAA_DEG.xlsx
