# Supplementary material for: FRUITFULL Is a Repressor of Apical Hook Opening in Arabidopsis thaliana
Source: Int J Mol Sci. 2020 Sep 3;21(17):6438. doi: 10.3390/ijms21176438 (PMC7504503; doi:10.3390/ijms21176438)
Supplement: Supplementary file 1 [file ijms-21-06438-s001.zip › supplemental files/SUP file 1_WT_MOCKvsWT_IAA_DEG.xlsx]

## Sheet: WT_MOCK vs WT_IAA
GENE ID	LOCUS	GENE ALIAS	UP/DOWN	WT_MOCK	WT_IAA	MOCK_FPKM	IAA_FPKM	LOG2	PVALUE	ANNOTATION
AT1G01140	1:64165-67625	CIPK9, PKS6, SnRK3.12	DOWN	MOCK	IAA	92.0555	54.6508	-0.752261	5e-05	CBL-interacting protein kinase 9
AT1G02520	1:523650-528745	ABCB11, MDR8, PGP11	DOWN	MOCK	IAA	1.16586	0.637449	-0.871014	0.0005	P-glycoprotein 11
AT1G04610	1:1279387-1281618	YUC3	UP	MOCK	IAA	3.07959	8.68114	1.49514	5e-05	YUCCA 3
AT1G05680	1:1703091-1704691	UGT74E2	DOWN	MOCK	IAA	7.77902	4.85632	-0.679725	0.0003	Uridine diphosphate glycosyltransferase 74E2
AT1G10657	1:3530466-3531842	NA	DOWN	MOCK	IAA	9.59977	5.55372	-0.789545	0.00025	Plant protein 1589 of unknown function
AT1G12610	1:4289943-4291017	DDF1	DOWN	MOCK	IAA	10.8461	6.22889	-0.800125	0.00035	Integrase-type DNA-binding superfamily protein
AT1G13245	1:4525485-4526064	DVL4, RTFL17	UP	MOCK	IAA	20.9081	47.5967	1.1868	5e-05	ROTUNDIFOLIA like 17
AT1G13670	1:4688155-4688966	NA	UP	MOCK	IAA	7.03816	12.3437	0.810507	0.0001	unknown protein; Has 22 Blast hits to 22 proteins in 7 species: Archae - 0; Bacteria - 0; Metazoa - 0; Fungi - 0; Plants - 22; Viruses - 0; Other Eukaryotes - 0 (source: NCBI BLink).
AT1G15580	1:5365664-5366497	ATAUX2-27, IAA5	UP	MOCK	IAA	4.29179	36.9009	3.104	5e-05	indole-3-acetic acid inducible 5
AT1G18400	1:6331397-6333743	BEE1	UP	MOCK	IAA	11.9509	20.2169	0.75844	5e-05	BR enhanced expression 1
AT1G18570	1:6389410-6391267	ATMYB51, BW51A, BW51B, HIG1	UP	MOCK	IAA	6.76972	11.5584	0.771777	5e-05	myb domain protein 51
AT1G18870	1:6515428-6519282	ATICS2	UP	MOCK	IAA	6.25597	9.57844	0.614558	0.0004	isochorismate synthase 2
AT1G19376	1:6697437-6697524	NA	UP	MOCK	IAA	43415.6	64282.5	0.566213	0.0004
AT1G21520	1:7534153-7534789	NA	DOWN	MOCK	IAA	7.81598	3.38125	-1.20887	5e-05	unknown protein; Has 9 Blast hits to 9 proteins in 2 species: Archae - 0; Bacteria - 0; Metazoa - 0; Fungi - 0; Plants - 9; Viruses - 0; Other Eukaryotes - 0 (source: NCBI BLink).
AT1G26945	1:9351453-9352761	KDR, PRE6	UP	MOCK	IAA	57.3851	96.3537	0.747663	5e-05	basic helix-loop-helix (bHLH) DNA-binding superfamily protein
AT1G27670	1:9627571-9628496	NA	UP	MOCK	IAA	16.9567	26.8056	0.660677	5e-05	unknown protein; BEST Arabidopsis thaliana protein match is: unknown protein (TAIR:AT1G75360.1); Has 35 Blast hits to 35 proteins in 6 species: Archae - 0; Bacteria - 0; Metazoa - 0; Fungi - 0; Plants - 35; Viruses - 0; Other Eukaryotes - 0 (source: NCBI BLink).
AT1G29395	1:10288196-10289621	COR413-TM1, COR413IM1, COR414-TM1	DOWN	MOCK	IAA	13.7743	6.999	-0.976755	5e-05	COLD REGULATED 314 INNER MEMBRANE 1
AT1G29430	1:10302649-10303335	SAUR62	UP	MOCK	IAA	7.52204	25.4074	1.75606	5e-05	SAUR-like auxin-responsive protein family
AT1G29440	1:10304506-10305108	SAUR63	UP	MOCK	IAA	11.748	31.1366	1.4062	5e-05	SAUR-like auxin-responsive protein family
AT1G29450	1:10305950-10306499	SAUR64	UP	MOCK	IAA	21.9058	55.8852	1.35116	5e-05	SAUR-like auxin-responsive protein family
AT1G29460	1:10307506-10308143	SAUR65	UP	MOCK	IAA	8.83496	33.5086	1.92324	5e-05	SAUR-like auxin-responsive protein family
AT1G29490	1:10319743-10320402	SAUR68	UP	MOCK	IAA	5.19891	22.8474	2.13575	5e-05	SAUR-like auxin-responsive protein family
AT1G29500	1:10321209-10321864	SAUR66	UP	MOCK	IAA	19.7976	60.0944	1.60191	5e-05	SAUR-like auxin-responsive protein family
AT1G29510	1:10322573-10323189	SAUR67	UP	MOCK	IAA	11.7667	26.1055	1.14964	5e-05	SAUR-like auxin-responsive protein family
AT1G30100	1:10571339-10573365	ATNCED5	UP	MOCK	IAA	0.186722	1.11503	2.57812	0.0001	nine-cis-epoxycarotenoid dioxygenase 5
AT1G31580	1:11311168-11311989	CXC750, ECS1	DOWN	MOCK	IAA	7.19813	3.13805	-1.19776	5e-05	ECS1
AT1G31880	1:11445489-11450189	BRX, NLM9	UP	MOCK	IAA	1.79259	4.15034	1.21119	5e-05	DZC (Disease resistance/zinc finger/chromosome condensation-like region) domain containing protein
AT1G32190	1:11592954-11595982	NA	UP	MOCK	IAA	2.88981	5.2603	0.864168	0.0001	alpha/beta-Hydrolases superfamily protein
AT1G40104	1:15081951-15085893	NA	DOWN	MOCK	IAA	5.45707	3.18648	-0.776162	0.00035	unknown protein; FUNCTIONS IN: molecular_function unknown; INVOLVED IN: biological_process unknown; LOCATED IN: cellular_component unknown; BEST Arabidopsis thaliana protein match is: unknown protein (TAIR:AT2G08986.1); Has 88 Blast hits to 39 proteins in 18 species: Archae - 0; Bacteria - 17; Metazoa - 9; Fungi - 0; Plants - 48; Viruses - 0; Other Eukaryotes - 14 (source: NCBI BLink).
AT1G44830	1:16933791-16934511	NA	UP	MOCK	IAA	9.40846	16.1532	0.779793	0.0001	Integrase-type DNA-binding superfamily protein
AT1G48920	1:18098094-18101623	ATNUC-L1, PARL1	DOWN	MOCK	IAA	23.4717	14.6707	-0.677986	5e-05	nucleolin like 1
AT1G50240	1:18607046-18614162	FU	DOWN	MOCK	IAA	1.81086	1.07511	-0.752188	0.0005	Protein kinase family protein with ARM repeat domain
AT1G51170	1:18953457-18954892	AGC2-3, UCN	UP	MOCK	IAA	11.6698	17.8534	0.613421	0.00035	Protein kinase superfamily protein
AT1G52830	1:19672495-19673644	IAA6, SHY1	UP	MOCK	IAA	18.1462	58.3405	1.68483	5e-05	indole-3-acetic acid 6
AT1G54120	1:20207019-20207540	NA	UP	MOCK	IAA	17.6095	39.9982	1.18358	5e-05	unknown protein; BEST Arabidopsis thaliana protein match is: unknown protein (TAIR:AT3G14060.1); Has 23 Blast hits to 23 proteins in 7 species: Archae - 0; Bacteria - 0; Metazoa - 0; Fungi - 0; Plants - 23; Viruses - 0; Other Eukaryotes - 0 (source: NCBI BLink).
AT1G56110	1:20984388-20986951	NOP56	DOWN	MOCK	IAA	11.7354	7.37421	-0.670309	0.00015	homolog of nucleolar protein NOP56
AT1G61275	1:22603120-22603295	U12	DOWN	MOCK	IAA	35321.2	12300	-1.52188	0.00045
AT1G65440	1:24306610-24314620	GTB1	DOWN	MOCK	IAA	10.1265	6.58866	-0.620075	0.0001	global transcription factor group B1
AT1G65920	1:24525101-24529294	NA	UP	MOCK	IAA	7.03661	12.2454	0.79929	5e-05	Regulator of chromosome condensation (RCC1) family with FYVE zinc finger domain
AT1G66970	1:24992552-24996117	GDPDL1, SVL2	DOWN	MOCK	IAA	6.07548	3.60267	-0.753931	5e-05	SHV3-like 2
AT1G67120	1:25069561-25095526	ATMDN1	DOWN	MOCK	IAA	1.43059	0.595545	-1.26433	5e-05	ATPases;nucleotide binding;ATP binding;nucleoside-triphosphatases;transcription factor binding
AT1G67900	1:25464725-25470017	NA	UP	MOCK	IAA	10.9758	17.817	0.698932	5e-05	Phototropic-responsive NPH3 family protein
AT1G69572	1:26161527-26163496	NA	UP	MOCK	IAA	17.7724	35.113	0.98237	5e-05
AT1G73260	1:27547273-27548190	ATKTI1	DOWN	MOCK	IAA	22.312	13.5778	-0.716567	0.0002	kunitz trypsin inhibitor 1
AT1G75490	1:28335501-28336706	NA	UP	MOCK	IAA	2.10105	5.1853	1.30332	5e-05	Integrase-type DNA-binding superfamily protein
AT1G76240	1:28602810-28603929	NA	UP	MOCK	IAA	40.433	71.6029	0.824484	5e-05	Arabidopsis protein of unknown function (DUF241)
AT1G78100	1:29387794-29389112	AUF1	UP	MOCK	IAA	33.5738	62.4605	0.895609	5e-05	F-box family protein
AT1G78340	1:29472891-29473863	ATGSTU22	DOWN	MOCK	IAA	6.01041	2.97707	-1.01357	0.0002	glutathione S-transferase TAU 22
AT1G79245	1:29804734-29809514	NA	DOWN	MOCK	IAA	85.0625	46.9705	-0.856769	0.00015
AT1G80180	1:30156825-30157584	NA	UP	MOCK	IAA	19.4311	28.8324	0.569329	0.0006	unknown protein; FUNCTIONS IN: molecular_function unknown; INVOLVED IN: biological_process unknown; LOCATED IN: plasma membrane; EXPRESSED IN: 21 plant structures; EXPRESSED DURING: 10 growth stages; BEST Arabidopsis thaliana protein match is: unknown protein (TAIR:AT1G15400.3); Has 30201 Blast hits to 17322 proteins in 780 species: Archae - 12; Bacteria - 1396; Metazoa - 17338; Fungi - 3422; Pla…
AT1G80240	1:30171356-30172839	DGR1	UP	MOCK	IAA	13.3371	24.909	0.90122	5e-05	Protein of unknown function, DUF642
AT2G01200	2:118016-119342	IAA32, MEE10	UP	MOCK	IAA	4.87432	9.85523	1.01569	5e-05	indole-3-acetic acid inducible 32
AT2G01890	2:396767-399208	ATPAP8	DOWN	MOCK	IAA	34.9572	18.9491	-0.883456	5e-05	purple acid phosphatase 8
AT2G06950	2:2859225-2863434	NA	DOWN	MOCK	IAA	1.03456	0.563906	-0.87549	0.00045
AT2G14960	2:6451371-6453670	GH3.1	UP	MOCK	IAA	0.588875	7.45059	3.66132	5e-05	Auxin-responsive GH3 family protein
AT2G17880	2:7766961-7767931	DJC24	UP	MOCK	IAA	13.6188	21.8205	0.680085	5e-05	Chaperone DnaJ-domain superfamily protein
AT2G18010	2:7833901-7834240	SAUR10	UP	MOCK	IAA	8.76292	41.1755	2.2323	5e-05	SAUR-like auxin-responsive protein family
AT2G18193	2:7917504-7919277	NA	DOWN	MOCK	IAA	9.98989	1.09804	-3.18554	5e-05	P-loop containing nucleoside triphosphate hydrolases superfamily protein
AT2G20723	2:8931848-8931922	NA	DOWN	MOCK	IAA	41780.4	22219.5	-0.910999	5e-05
AT2G22810	2:9717790-9719472	ACC4, ACS4, ATACS4	UP	MOCK	IAA	0.364421	3.17517	3.12316	5e-05	1-aminocyclopropane-1-carboxylate synthase 4
AT2G23170	2:9863854-9866562	GH3.3	UP	MOCK	IAA	5.42998	50.7751	3.2251	5e-05	Auxin-responsive GH3 family protein
AT2G25450	2:10829915-10831655	NA	DOWN	MOCK	IAA	26.0476	17.2404	-0.595354	0.00045	2-oxoglutarate (2OG) and Fe(II)-dependent oxygenase superfamily protein
AT2G26710	2:11380491-11383612	BAS1, CYP72B1, CYP734A1	UP	MOCK	IAA	9.74201	15.6139	0.680537	5e-05	Cytochrome P450 superfamily protein
AT2G27840	2:11861993-11863886	HD2D, HDA13, HDT04, HDT4	DOWN	MOCK	IAA	12.1629	7.29763	-0.736986	0.0004	histone deacetylase-related / HD-related
AT2G28200	2:12024148-12025306	NA	UP	MOCK	IAA	13.8194	20.7427	0.585906	0.00055	C2H2-type zinc finger family protein
AT2G28350	2:12114330-12116848	ARF10	UP	MOCK	IAA	9.42613	14.4631	0.617638	0.0001	auxin response factor 10
AT2G35930	2:15082854-15084473	ATPUB23	UP	MOCK	IAA	3.33175	6.92847	1.05626	5e-05	plant U-box 23
AT2G36120	2:15165436-15166465	DOT1	DOWN	MOCK	IAA	5.9642	2.98935	-0.996499	5e-05	Glycine-rich protein family
AT2G39870	2:16643380-16645377	NA	UP	MOCK	IAA	14.2311	22.1458	0.637979	0.00015	unknown protein; BEST Arabidopsis thaliana protein match is: unknown protein (TAIR:AT3G55690.1); Has 73 Blast hits to 71 proteins in 14 species: Archae - 0; Bacteria - 0; Metazoa - 2; Fungi - 2; Plants - 69; Viruses - 0; Other Eukaryotes - 0 (source: NCBI BLink).
AT2G40610	2:16948862-16950557	ATEXP8, ATEXPA8, ATHEXP ALPHA 1.11	UP	MOCK	IAA	70.7691	106.765	0.593253	0.00045	expansin A8
AT2G42380	2:17646899-17648945	ATBZIP34	UP	MOCK	IAA	7.08662	15.7779	1.15474	5e-05	Basic-leucine zipper (bZIP) transcription factor family protein
AT2G42430	2:17663443-17665295	ASL18, LBD16	UP	MOCK	IAA	1.40205	4.11994	1.55508	5e-05	lateral organ boundaries-domain 16
AT2G43610	2:18087839-18089224	NA	DOWN	MOCK	IAA	3.65342	1.72745	-1.0806	0.00025	Chitinase family protein
AT2G45220	2:18644083-18646447	PME17	DOWN	MOCK	IAA	1.75692	0.792771	-1.14807	0.0001	Plant invertase/pectin methylesterase inhibitor superfamily
AT2G46740	2:19205156-19207455	ATGulLO5	DOWN	MOCK	IAA	6.73564	3.84677	-0.808166	5e-05	D-arabinono-1,4-lactone oxidase family protein
AT2G46810	2:19239693-19242672	NA	UP	MOCK	IAA	9.9958	14.8358	0.569686	0.00055	basic helix-loop-helix (bHLH) DNA-binding superfamily protein
AT2G46990	2:19307854-19308990	IAA20	UP	MOCK	IAA	15.5979	25.264	0.695733	5e-05	indole-3-acetic acid inducible 20
AT3G01190	3:67057-68536	NA	DOWN	MOCK	IAA	5.24022	2.60483	-1.00844	5e-05	Peroxidase superfamily protein
AT3G01313	3:104686-104769	NA	DOWN	MOCK	IAA	118742	58219.7	-1.02825	5e-05
AT3G01600	3:229170-231105	anac044, NAC044	DOWN	MOCK	IAA	3.27825	0.290075	-3.49843	5e-05	NAC domain containing protein 44
AT3G03820	3:976932-977223	SAUR29	UP	MOCK	IAA	32.352	104.025	1.685	5e-05	SAUR-like auxin-responsive protein family
AT3G03830	3:979983-980488	SAUR28	UP	MOCK	IAA	14.3087	54.585	1.93162	5e-05	SAUR-like auxin-responsive protein family
AT3G03840	3:981071-981798	SAUR27	UP	MOCK	IAA	8.8243	26.8589	1.60584	5e-05	SAUR-like auxin-responsive protein family
AT3G03850	3:983120-983751	SAUR26	UP	MOCK	IAA	17.0675	50.5512	1.56649	5e-05	SAUR-like auxin-responsive protein family
AT3G03920	3:1006841-1010480	NA	DOWN	MOCK	IAA	6.18858	2.8736	-1.10675	0.00035	H/ACA ribonucleoprotein complex, subunit Gar1/Naf1 protein
AT3G04070	3:1061525-1063103	anac047, NAC047	DOWN	MOCK	IAA	2.96265	1.4215	-1.05948	0.0002	NAC domain containing protein 47
AT3G05660	3:1648842-1652001	ATRLP33	DOWN	MOCK	IAA	6.0898	3.22433	-0.917395	5e-05	receptor like protein 33
AT3G06530	3:2022432-2033791	NA	DOWN	MOCK	IAA	4.16996	2.48213	-0.748451	5e-05	ARM repeat superfamily protein
AT3G06870	3:2167729-2169222	NA	UP	MOCK	IAA	12.2573	20.4792	0.740515	0.0005	proline-rich family protein
AT3G06990	3:2206386-2208058	NA	UP	MOCK	IAA	2.15338	4.09768	0.928202	5e-05	Cysteine/Histidine-rich C1 domain family protein
AT3G07000	3:2209411-2211307	NA	UP	MOCK	IAA	2.27969	5.06464	1.15162	5e-05	Cysteine/Histidine-rich C1 domain family protein
AT3G07050	3:2229589-2232361	NSN1	DOWN	MOCK	IAA	6.74412	3.96151	-0.767581	5e-05	GTP-binding family protein
AT3G07215	3:2296035-2297789	NA	DOWN	MOCK	IAA	171.54	102.911	-0.737145	0.0005
AT3G11410	3:3583882-3585790	AHG3, ATPP2CA	DOWN	MOCK	IAA	10.2703	6.34268	-0.695313	5e-05	protein phosphatase 2CA
AT3G11964	3:3793956-3806626	RRP5	DOWN	MOCK	IAA	4.03063	2.63444	-0.613512	0.00055	RNA binding;RNA binding
AT3G13080	3:4195785-4201265	ABCC3, ATMRP3	DOWN	MOCK	IAA	14.3768	9.31881	-0.625528	0.00045	multidrug resistance-associated protein 3
AT3G13360	3:4338358-4340412	WIP3	UP	MOCK	IAA	10.9097	16.8033	0.623134	0.00015	WPP domain interacting protein 3
AT3G13525	3:4411167-4411253	NA	DOWN	MOCK	IAA	32859.7	17429.8	-0.914761	5e-05
AT3G13810	3:4544363-4547513	ATIDD11	UP	MOCK	IAA	5.68977	9.34175	0.715324	5e-05	indeterminate(ID)-domain 11
AT3G13980	3:4619037-4620262	NA	UP	MOCK	IAA	15.1699	24.165	0.671712	5e-05	unknown protein; BEST Arabidopsis thaliana protein match is: unknown protein (TAIR:AT1G54200.1); Has 1485 Blast hits to 418 proteins in 98 species: Archae - 0; Bacteria - 6; Metazoa - 246; Fungi - 61; Plants - 107; Viruses - 6; Other Eukaryotes - 1059 (source: NCBI BLink).
AT3G14770	3:4957333-4959704	ATSWEET2	DOWN	MOCK	IAA	9.08878	4.80692	-0.918973	5e-05	Nodulin MtN3 family protein
AT3G15540	3:5264023-5265678	IAA19, MSG2	UP	MOCK	IAA	33.8066	70.9334	1.06916	5e-05	indole-3-acetic acid inducible 19
AT3G18610	3:6404082-6407822	ATNUC-L2, PARLL1	DOWN	MOCK	IAA	1.46692	0.273472	-2.42333	5e-05	nucleolin like 2
AT3G20500	3:7157905-7160417	ATPAP18	DOWN	MOCK	IAA	38.932	24.018	-0.696841	0.00015	purple acid phosphatase 18
AT3G20830	3:7284962-7286260	AGC2-4, UCNL	UP	MOCK	IAA	9.3332	16.5028	0.822266	5e-05	AGC (cAMP-dependent, cGMP-dependent and protein kinase C) kinase family protein
AT3G22310	3:7887285-7890019	ATRH9, PMH1	DOWN	MOCK	IAA	2.25375	1.24351	-0.857904	0.00045	putative mitochondrial RNA helicase 1
AT3G22840	3:8084446-8085560	ELIP, ELIP1	DOWN	MOCK	IAA	165.366	102.286	-0.693056	5e-05	Chlorophyll A-B binding family protein
AT3G23030	3:8180767-8181800	IAA2	UP	MOCK	IAA	132.747	360.129	1.43983	5e-05	indole-3-acetic acid inducible 2
AT3G23635	3:8497940-8498072	RTFL13	UP	MOCK	IAA	77.5869	402.853	2.37637	5e-05	ROTUNDIFOLIA like 13
AT3G25710	3:9369518-9371394	ATAIG1, BHLH32, TMO5	UP	MOCK	IAA	5.46417	10.5191	0.944941	5e-05	basic helix-loop-helix 32
AT3G25717	3:9375101-9375671	DVL6, RTFL16	UP	MOCK	IAA	63.2957	120.118	0.924268	5e-05	ROTUNDIFOLIA like 16
AT3G26510	3:9710336-9712660	NA	UP	MOCK	IAA	45.1081	72.2456	0.679525	5e-05	Octicosapeptide/Phox/Bem1p family protein
AT3G26740	3:9827800-9828680	CCL	UP	MOCK	IAA	38.9991	58.6927	0.589741	0.0003	CCR-like
AT3G28420	3:10654469-10655388	NA	UP	MOCK	IAA	0.529892	2.10026	1.98679	0.00035	Putative membrane lipoprotein
AT3G28857	3:10855631-10856624	PRE5	UP	MOCK	IAA	5.3038	12.7316	1.26332	5e-05	basic helix-loop-helix (bHLH) DNA-binding family protein
AT3G29370	3:11278588-11279108	P1R3	UP	MOCK	IAA	51.005	93.2949	0.87116	5e-05	unknown protein; BEST Arabidopsis thaliana protein match is: unknown protein (TAIR:AT5G39240.1); Has 16 Blast hits to 16 proteins in 5 species: Archae - 0; Bacteria - 0; Metazoa - 0; Fungi - 0; Plants - 16; Viruses - 0; Other Eukaryotes - 0 (source: NCBI BLink).
AT3G42800	3:14905229-14907035	NA	UP	MOCK	IAA	5.8657	15.1424	1.36822	5e-05	unknown protein; BEST Arabidopsis thaliana protein match is: unknown protein (TAIR:AT1G54200.1); Has 853 Blast hits to 340 proteins in 98 species: Archae - 0; Bacteria - 94; Metazoa - 145; Fungi - 62; Plants - 95; Viruses - 0; Other Eukaryotes - 457 (source: NCBI BLink).
AT3G44300	3:15983310-15985535	ATNIT2	DOWN	MOCK	IAA	4.18886	1.67226	-1.32476	5e-05	nitrilase 2
AT3G44750	3:16297978-16299847	ATHD2A, HDA3, HDT1	DOWN	MOCK	IAA	10.5751	5.62958	-0.909576	5e-05	histone deacetylase 3
AT3G50330	3:18657207-18658307	HEC2	UP	MOCK	IAA	19.1828	30.9492	0.690089	0.0001	basic helix-loop-helix (bHLH) DNA-binding superfamily protein
AT3G50350	3:18672101-18674022	NA	UP	MOCK	IAA	11.5486	19.6327	0.765544	0.0003	Protein of unknown function (DUF1685)
AT3G50665	3:18826039-18826111	NA	UP	MOCK	IAA	7952.82	20044.3	1.33365	5e-05
AT3G50770	3:18873957-18874780	CML41	UP	MOCK	IAA	4.47276	12.2973	1.45911	5e-05	calmodulin-like 41
AT3G50800	3:18882303-18882999	NA	UP	MOCK	IAA	3.54258	8.06604	1.18706	0.0001	unknown protein; FUNCTIONS IN: molecular_function unknown; INVOLVED IN: N-terminal protein myristoylation; LOCATED IN: cellular_component unknown; BEST Arabidopsis thaliana protein match is: unknown protein (TAIR:AT5G66580.1); Has 249 Blast hits to 249 proteins in 14 species: Archae - 0; Bacteria - 0; Metazoa - 0; Fungi - 0; Plants - 249; Viruses - 0; Other Eukaryotes - 0 (source: NCBI BLink).
AT3G50890	3:18916165-18917328	ATHB28, ZHD7	UP	MOCK	IAA	8.75494	15.8621	0.857412	5e-05	homeobox protein 28
AT3G50970	3:18940776-18941554	LTI30, XERO2	DOWN	MOCK	IAA	45.1484	22.7224	-0.990561	5e-05	dehydrin family protein
AT3G51410	3:19081256-19082212	NA	UP	MOCK	IAA	7.7228	19.1151	1.30752	5e-05	Arabidopsis protein of unknown function (DUF241)
AT3G53480	3:19825306-19831797	ABCG37, ATPDR9, PIS1	DOWN	MOCK	IAA	4.61202	3.01303	-0.614182	0.00055	pleiotropic drug resistance 9
AT3G55160	3:20445411-20452400	NA	DOWN	MOCK	IAA	1.99931	1.22174	-0.710562	0.00015	unknown protein; EXPRESSED IN: 11 plant structures; EXPRESSED DURING: 4 anthesis, F mature embryo stage, petal differentiation and expansion stage, E expanded cotyledon stage, D bilateral stage; CONTAINS InterPro DOMAIN/s: Protein of unknown function DUF2428, death-receptor-like (InterPro:IPR019442); Has 357 Blast hits to 330 proteins in 163 species: Archae - 0; Bacteria - 0; Metazoa - 144; Fungi…
AT3G56080	3:20810308-20813036	NA	DOWN	MOCK	IAA	4.46101	2.64423	-0.754523	0.0002	S-adenosyl-L-methionine-dependent methyltransferases superfamily protein
AT3G58190	3:21548483-21549558	ASL16, LBD29	UP	MOCK	IAA	0.422177	2.60082	2.62305	0.0002	lateral organ boundaries-domain 29
AT3G59900	3:22129725-22130464	ARGOS	UP	MOCK	IAA	47.9325	89.8726	0.906879	5e-05	auxin-regulated gene involved in organ size
AT3G60390	3:22320594-22322586	HAT3	UP	MOCK	IAA	12.5967	19.1904	0.607334	0.0003	homeobox-leucine zipper protein 3
AT3G61220	3:22662952-22665597	SDR1	DOWN	MOCK	IAA	3.61748	1.81742	-0.993096	0.0005	NAD(P)-binding Rossmann-fold superfamily protein
AT3G61460	3:22741510-22742284	BRH1	UP	MOCK	IAA	59.3952	97.7051	0.718088	5e-05	brassinosteroid-responsive RING-H2
AT3G61490	3:22758062-22760340	NA	UP	MOCK	IAA	20.0815	30.8984	0.621662	0.0002	Pectin lyase-like superfamily protein
AT3G62100	3:22995790-22996761	IAA30	UP	MOCK	IAA	0.623772	4.02975	2.6916	5e-05	indole-3-acetic acid inducible 30
AT4G00050	4:17791-20066	UNE10	UP	MOCK	IAA	6.22799	10.5611	0.761925	5e-05	basic helix-loop-helix (bHLH) DNA-binding superfamily protein
AT4G03400	4:1497535-1499865	DFL2, GH3-10	UP	MOCK	IAA	4.1027	6.46032	0.655032	0.00015	Auxin-responsive GH3 family protein
AT4G05020	4:2572620-2576595	NDB2	DOWN	MOCK	IAA	9.96544	6.3497	-0.650246	0.0001	NAD(P)H dehydrogenase B2
AT4G09890	4:6218395-6218927	NA	UP	MOCK	IAA	89.9525	150.535	0.742864	0.0001	Protein of unknown function (DUF3511)
AT4G10150	4:6328135-6329589	NA	UP	MOCK	IAA	2.46792	8.0225	1.70076	5e-05	RING/U-box superfamily protein
AT4G13790	4:7999713-8000222	SAUR25	UP	MOCK	IAA	10.5503	40.9183	1.95547	5e-05	SAUR-like auxin-responsive protein family
AT4G13830	4:8011423-8012780	DJC26, J20	UP	MOCK	IAA	16.8597	25.75	0.610988	0.00045	DNAJ-like 20
AT4G13850	4:8020950-8022260	ATGRP2, GR-RBP2	DOWN	MOCK	IAA	19.9546	11.682	-0.772432	5e-05	glycine-rich RNA-binding protein 2
AT4G14560	4:8361057-8361986	AXR5, IAA1	UP	MOCK	IAA	12.9499	44.0102	1.7649	5e-05	indole-3-acetic acid inducible
AT4G14819	4:8507262-8507789	NA	UP	MOCK	IAA	5.99503	14.364	1.26062	5e-05	Protein of unknown function (DUF1677)
AT4G17460	4:9739662-9741146	HAT1, JAB	UP	MOCK	IAA	25.3254	46.5918	0.879493	5e-05	Homeobox-leucine zipper protein 4 (HB-4) / HD-ZIP protein
AT4G21200	4:11302684-11306601	ATGA2OX8	UP	MOCK	IAA	2.84288	8.98234	1.65974	5e-05	gibberellin 2-oxidase 8
AT4G21740	4:11545925-11546434	NA	UP	MOCK	IAA	21.3714	36.8988	0.787889	5e-05	unknown protein; BEST Arabidopsis thaliana protein match is: unknown protein (TAIR:AT1G30515.1); Has 20 Blast hits to 20 proteins in 4 species: Archae - 0; Bacteria - 0; Metazoa - 0; Fungi - 0; Plants - 20; Viruses - 0; Other Eukaryotes - 0 (source: NCBI BLink).
AT4G21745	4:11548617-11550622	NA	UP	MOCK	IAA	3.64987	7.21824	0.9838	5e-05	PAK-box/P21-Rho-binding family protein
AT4G22380	4:11811749-11813000	NA	DOWN	MOCK	IAA	8.07142	4.2219	-0.934931	5e-05	Ribosomal protein L7Ae/L30e/S12e/Gadd45 family protein
AT4G22780	4:11968275-11971149	ACR7	UP	MOCK	IAA	6.38704	9.5995	0.587813	0.00045	ACT domain repeat 7
AT4G23560	4:12293331-12295859	ATGH9B15	DOWN	MOCK	IAA	13.0494	8.27315	-0.657473	0.0001	glycosyl hydrolase 9B15
AT4G24275	4:12588518-12589062	NA	UP	MOCK	IAA	59.52	91.2372	0.616247	5e-05	Identified as a screen for stress-responsive genes.
AT4G24960	4:12827935-12829243	ATHVA22D	DOWN	MOCK	IAA	53.3526	30.1788	-0.822024	5e-05	HVA22 homologue D
AT4G25420	4:12990883-12992458	AT2301, ATGA20OX1, GA5	UP	MOCK	IAA	6.10369	19.7489	1.69402	5e-05	2-oxoglutarate (2OG) and Fe(II)-dependent oxygenase superfamily protein
AT4G25630	4:13074132-13076429	ATFIB2	DOWN	MOCK	IAA	5.77059	2.94025	-0.97278	0.0004	fibrillarin 2
AT4G27010	4:13557973-13568296	EMB2788	DOWN	MOCK	IAA	0.899203	0.480967	-0.90271	0.0001	INVOLVED IN: biological_process unknown; LOCATED IN: cellular_component unknown; EXPRESSED IN: 20 plant structures; EXPRESSED DURING: 10 growth stages; CONTAINS InterPro DOMAIN/s: Ribosome 60S biogenesis N-terminal (InterPro:IPR021714); BEST Arabidopsis thaliana protein match is: unknown protein (TAIR:AT1G72270.1); Has 312 Blast hits to 226 proteins in 103 species: Archae - 0; Bacteria - 2; Metaz…
AT4G27260	4:13653608-13656204	GH3.5, WES1	UP	MOCK	IAA	28.1485	54.1002	0.942576	5e-05	Auxin-responsive GH3 family protein
AT4G27280	4:13663575-13664240	NA	UP	MOCK	IAA	15.7593	55.2986	1.81104	5e-05	Calcium-binding EF-hand family protein
AT4G27460	4:13732909-13734304	CBSX5	UP	MOCK	IAA	4.30722	7.0027	0.701154	0.00045	Cystathionine beta-synthase (CBS) family protein
AT4G28640	4:14142129-14143969	IAA11	UP	MOCK	IAA	7.04009	11.6687	0.728981	0.0002	indole-3-acetic acid inducible 11
AT4G28780	4:14215544-14217579	NA	DOWN	MOCK	IAA	3.00059	1.5031	-0.997301	0.0001	GDSL-like Lipase/Acylhydrolase superfamily protein
AT4G30140	4:14738386-14740676	CDEF1	DOWN	MOCK	IAA	11.3154	6.80195	-0.734263	5e-05	GDSL-like Lipase/Acylhydrolase superfamily protein
AT4G30650	4:14954319-14954968	NA	DOWN	MOCK	IAA	26.3518	16.5136	-0.674248	0.0004	Low temperature and salt responsive protein family
AT4G30990	4:15084097-15097920	NA	DOWN	MOCK	IAA	2.7464	1.75735	-0.644135	5e-05	ARM repeat superfamily protein
AT4G32280	4:15583386-15584769	IAA29	UP	MOCK	IAA	16.8589	39.6625	1.23426	5e-05	indole-3-acetic acid inducible 29
AT4G32350	4:15617465-15620910	NA	UP	MOCK	IAA	6.60566	10.2931	0.639899	0.0001	Regulator of Vps4 activity in the MVB pathway protein
AT4G34760	4:16582182-16582879	SAUR50	UP	MOCK	IAA	67.73	104.931	0.631571	0.0002	SAUR-like auxin-responsive protein family
AT4G34770	4:16591228-16591892	SAUR1	UP	MOCK	IAA	7.80539	14.0544	0.848475	0.0001	SAUR-like auxin-responsive protein family
AT4G36110	4:17089948-17090825	SAUR9	UP	MOCK	IAA	7.48561	18.7229	1.32261	5e-05	SAUR-like auxin-responsive protein family
AT4G36540	4:17243582-17245296	BEE2	UP	MOCK	IAA	31.4729	47.9711	0.608054	0.00025	BR enhanced expression 2
AT4G37030	4:17451927-17454760	NA	DOWN	MOCK	IAA	0.901507	0.293651	-1.61824	0.0003	unknown protein; FUNCTIONS IN: molecular_function unknown; INVOLVED IN: biological_process unknown; LOCATED IN: endomembrane system; BEST Arabidopsis thaliana protein match is: unknown protein (TAIR:AT4G12680.1); Has 101 Blast hits to 99 proteins in 12 species: Archae - 0; Bacteria - 0; Metazoa - 0; Fungi - 0; Plants - 101; Viruses - 0; Other Eukaryotes - 0 (source: NCBI BLink).
AT4G37390	4:17579656-17582022	AUR3, BRU6, GH3-2, YDK1	UP	MOCK	IAA	1.0869	28.3089	4.70297	5e-05	Auxin-responsive GH3 family protein
AT4G37590	4:17662841-17666428	MEL1, NPY5	UP	MOCK	IAA	26.7339	41.0262	0.617876	0.00035	Phototropic-responsive NPH3 family protein
AT4G37770	4:17752083-17754157	ACS8	UP	MOCK	IAA	1.57934	17.866	3.49982	5e-05	1-amino-cyclopropane-1-carboxylate synthase 8
AT4G37800	4:17775473-17777397	XTH7	DOWN	MOCK	IAA	9.08773	5.71488	-0.669197	0.0006	xyloglucan endotransglucosylase/hydrolase 7
AT4G37890	4:17812735-17815178	EDA40	UP	MOCK	IAA	2.89653	6.09308	1.07285	0.0003	Zinc finger (C3HC4-type RING finger) family protein
AT4G37895	4:17812735-17815178	NA	UP	MOCK	IAA	9.48346	19.6104	1.04813	5e-05
AT4G38825	4:18121525-18122010	SAUR13	UP	MOCK	IAA	18.5047	50.9897	1.46232	5e-05	SAUR-like auxin-responsive protein family
AT4G38850	4:18126170-18126680	ATSAUR15, SAUR-AC1, SAUR_AC1	UP	MOCK	IAA	5.16345	24.2574	2.23202	5e-05	SAUR-like auxin-responsive protein family
AT4G38860	4:18130267-18131060	SAUR16	UP	MOCK	IAA	14.2067	23.534	0.728168	5e-05	SAUR-like auxin-responsive protein family
AT4G39070	4:18204854-18206509	BBX20, BZS1	DOWN	MOCK	IAA	70.0808	41.8023	-0.745439	5e-05	B-box zinc finger family protein
AT4G39675	4:18413774-18414240	NA	DOWN	MOCK	IAA	14.0999	6.91642	-1.02758	0.0003	unknown protein; Has 30201 Blast hits to 17322 proteins in 780 species: Archae - 12; Bacteria - 1396; Metazoa - 17338; Fungi - 3422; Plants - 5037; Viruses - 0; Other Eukaryotes - 2996 (source: NCBI BLink).
AT5G01215	5:84306-86275	NA	UP	MOCK	IAA	39.7692	65.791	0.726239	5e-05
AT5G03552	5:897019-897356	MIR822A	DOWN	MOCK	IAA	262.253	121.551	-1.1094	5e-05
AT5G04190	5:1150891-1152481	PKS4	UP	MOCK	IAA	10.6517	16.451	0.627098	0.00015	phytochrome kinase substrate 4
AT5G04770	5:1379067-1382419	ATCAT6	UP	MOCK	IAA	12.6277	18.9989	0.589316	0.0002	cationic amino acid transporter 6
AT5G07920	5:2524777-2529330	ATDGK1	DOWN	MOCK	IAA	27.8527	16.564	-0.749767	5e-05	diacylglycerol kinase1
AT5G08640	5:2803956-2805606	ATFLS1	DOWN	MOCK	IAA	14.0048	8.30139	-0.754497	5e-05	flavonol synthase 1
AT5G09970	5:3111944-3114239	CYP78A7	UP	MOCK	IAA	3.85737	7.34822	0.929778	5e-05	cytochrome P450, family 78, subfamily A, polypeptide 7
AT5G11550	5:3708008-3709246	NA	UP	MOCK	IAA	11.8545	20.0447	0.757792	5e-05	ARM repeat superfamily protein
AT5G12050	5:3890103-3891513	NA	UP	MOCK	IAA	3.90129	8.17691	1.06761	5e-05	unknown protein; BEST Arabidopsis thaliana protein match is: unknown protein (TAIR:AT3G13980.1); Has 1807 Blast hits to 1807 proteins in 277 species: Archae - 0; Bacteria - 0; Metazoa - 736; Fungi - 347; Plants - 385; Viruses - 0; Other Eukaryotes - 339 (source: NCBI BLink).
AT5G13210	5:4214503-4216686	NA	DOWN	MOCK	IAA	3.75498	0.5577	-2.75124	5e-05	Uncharacterised conserved protein UCP015417, vWA
AT5G15580	5:5068300-5072492	LNG1, TRM2	UP	MOCK	IAA	17.9193	29.5821	0.723205	0.0001	longifolia1
AT5G15830	5:5168542-5169361	ATbZIP3	UP	MOCK	IAA	9.24778	21.4928	1.21668	5e-05	basic leucine-zipper 3
AT5G17460	5:5757097-5759795	NA	DOWN	MOCK	IAA	5.44999	3.47402	-0.649645	0.0004	unknown protein; FUNCTIONS IN: molecular_function unknown; INVOLVED IN: response to salt stress.
AT5G17850	5:5899252-5900932	NA	DOWN	MOCK	IAA	32.0543	15.3539	-1.06191	5e-05	Sodium/calcium exchanger family protein
AT5G18010	5:5962896-5963405	SAUR19	UP	MOCK	IAA	21.8926	66.9168	1.61193	5e-05	SAUR-like auxin-responsive protein family
AT5G18020	5:5966182-5966677	SAUR20	UP	MOCK	IAA	23.9469	53.4867	1.15934	5e-05	SAUR-like auxin-responsive protein family
AT5G18030	5:5968434-5968938	NA	UP	MOCK	IAA	21.1391	70.4944	1.7376	5e-05	SAUR-like auxin-responsive protein family
AT5G18050	5:5974566-5975054	SAUR22	UP	MOCK	IAA	22.611	76.6155	1.76061	5e-05	SAUR-like auxin-responsive protein family
AT5G18060	5:5975953-5976496	SAUR23	UP	MOCK	IAA	23.1982	81.8402	1.8188	5e-05	SAUR-like auxin-responsive protein family
AT5G18070	5:5981006-5982934	DRT101	UP	MOCK	IAA	4.26237	7.17625	0.751576	0.0001	phosphoglucosamine mutase-related
AT5G18080	5:5983839-5984112	SAUR24	UP	MOCK	IAA	40.1987	132.419	1.71989	5e-05	SAUR-like auxin-responsive protein family
AT5G18930	5:6311724-6313323	BUD2, SAMDC4	UP	MOCK	IAA	0.652341	1.71168	1.39172	0.0001	Adenosylmethionine decarboxylase family protein
AT5G22310	5:7383628-7385734	NA	UP	MOCK	IAA	8.13088	12.1994	0.585323	0.0005	unknown protein; BEST Arabidopsis thaliana protein match is: unknown protein (TAIR:AT3G11590.1); Has 30201 Blast hits to 17322 proteins in 780 species: Archae - 12; Bacteria - 1396; Metazoa - 17338; Fungi - 3422; Plants - 5037; Viruses - 0; Other Eukaryotes - 2996 (source: NCBI BLink).
AT5G24280	5:8251377-8262154	GMI1	DOWN	MOCK	IAA	2.44977	1.00575	-1.28437	5e-05	gamma-irradiation and mitomycin c induced 1
AT5G25190	5:8706789-8707748	ESE3	UP	MOCK	IAA	4.38197	8.69687	0.988919	5e-05	Integrase-type DNA-binding superfamily protein
AT5G26340	5:9243510-9247066	ATSTP13, MSS1	DOWN	MOCK	IAA	12.6756	7.63602	-0.731166	5e-05	Major facilitator superfamily protein
AT5G26960	5:9484733-9486149	NA	UP	MOCK	IAA	5.86888	9.18151	0.645645	0.00045	Galactose oxidase/kelch repeat superfamily protein
AT5G39240	5:15712682-15713003	NA	UP	MOCK	IAA	9.3136	21.8429	1.22976	0.0003	unknown protein; BEST Arabidopsis thaliana protein match is: unknown protein (TAIR:AT3G29370.1); Has 15 Blast hits to 15 proteins in 4 species: Archae - 0; Bacteria - 0; Metazoa - 0; Fungi - 0; Plants - 15; Viruses - 0; Other Eukaryotes - 0 (source: NCBI BLink).
AT5G39860	5:15957416-15958455	BHLH136, BNQ1, PRE1	UP	MOCK	IAA	10.2659	20.37	0.988589	5e-05	basic helix-loop-helix (bHLH) DNA-binding family protein
AT5G41400	5:16569376-16570177	NA	UP	MOCK	IAA	17.9812	34.0642	0.921769	5e-05	RING/U-box superfamily protein
AT5G43580	5:17507882-17508668	UPI	DOWN	MOCK	IAA	51.3215	27.5803	-0.895928	5e-05	Serine protease inhibitor, potato inhibitor I-type family protein
AT5G43700	5:17550232-17551581	ATAUX2-11, IAA4	UP	MOCK	IAA	78.9114	143.571	0.863461	5e-05	AUX/IAA transcriptional regulator family protein
AT5G44260	5:17829625-17831225	ATTZF5	UP	MOCK	IAA	15.7395	29.1235	0.887793	5e-05	Zinc finger C-x8-C-x5-C-x3-H type family protein
AT5G46240	5:18743565-18746730	ATKAT1	UP	MOCK	IAA	10.0631	17.7684	0.820244	5e-05	potassium channel in Arabidopsis thaliana 1
AT5G47370	5:19216311-19217909	HAT2	UP	MOCK	IAA	31.5882	124.032	1.97326	5e-05	Homeobox-leucine zipper protein 4 (HB-4) / HD-ZIP protein
AT5G49700	5:20192598-20193429	AHL17	UP	MOCK	IAA	22.8738	38.1499	0.737982	5e-05	Predicted AT-hook DNA-binding family protein
AT5G50915	5:20710208-20712315	NA	UP	MOCK	IAA	14.2791	22.2122	0.637448	0.00015	basic helix-loop-helix (bHLH) DNA-binding superfamily protein
AT5G51190	5:20800583-20801416	NA	UP	MOCK	IAA	2.12183	6.70033	1.65893	5e-05	Integrase-type DNA-binding superfamily protein
AT5G51670	5:20993536-20995644	NA	UP	MOCK	IAA	11.4823	18.4083	0.68094	5e-05	Protein of unknown function (DUF668)
AT5G52310	5:21240848-21243613	COR78, LTI140, LTI78, RD29A	DOWN	MOCK	IAA	62.7448	33.4799	-0.9062	5e-05	low-temperature-responsive protein 78 (LTI78) / desiccation-responsive protein 29A (RD29A)
AT5G52550	5:21327711-21330136	NA	UP	MOCK	IAA	6.7647	10.741	0.667029	0.0001	unknown protein; BEST Arabidopsis thaliana protein match is: unknown protein (TAIR:AT4G25670.2); Has 30201 Blast hits to 17322 proteins in 780 species: Archae - 12; Bacteria - 1396; Metazoa - 17338; Fungi - 3422; Plants - 5037; Viruses - 0; Other Eukaryotes - 2996 (source: NCBI BLink).
AT5G52900	5:21452441-21453808	MAKR6	UP	MOCK	IAA	3.82975	25.7939	2.75171	5e-05	unknown protein; Has 30201 Blast hits to 17322 proteins in 780 species: Archae - 12; Bacteria - 1396; Metazoa - 17338; Fungi - 3422; Plants - 5037; Viruses - 0; Other Eukaryotes - 2996 (source: NCBI BLink).
AT5G53020	5:21499898-21502401	NA	UP	MOCK	IAA	2.15864	4.19218	0.95758	5e-05	Ribonuclease P protein subunit P38-related
AT5G53830	5:21857049-21857984	NA	UP	MOCK	IAA	3.5112	6.40345	0.866884	0.0002	VQ motif-containing protein
AT5G54490	5:22121403-22121931	PBP1	UP	MOCK	IAA	2.11648	8.80469	2.0566	5e-05	pinoid-binding protein 1
AT5G54510	5:22131092-22133678	DFL1, GH3.6	UP	MOCK	IAA	9.44226	19.7928	1.06777	5e-05	Auxin-responsive GH3 family protein
AT5G54630	5:22192498-22194308	NA	UP	MOCK	IAA	6.08794	10.6783	0.810653	5e-05	zinc finger protein-related
AT5G57180	5:23167841-23170999	CIA2	UP	MOCK	IAA	32.3595	47.3544	0.549308	0.0006	chloroplast import apparatus 2
AT5G58750	5:23728787-23730122	NA	UP	MOCK	IAA	4.27851	9.04715	1.08035	5e-05	NAD(P)-binding Rossmann-fold superfamily protein
AT5G62280	5:25017072-25018246	NA	UP	MOCK	IAA	43.8106	92.2728	1.07463	5e-05	Protein of unknown function (DUF1442)
AT5G63160	5:25333262-25335485	BT1	UP	MOCK	IAA	6.03795	10.3047	0.771169	5e-05	BTB and TAZ domain protein 1
AT5G64100	5:25650640-25652123	NA	DOWN	MOCK	IAA	55.5198	35.8806	-0.6298	0.00055	Peroxidase superfamily protein
AT5G65140	5:26019587-26022222	TPPJ	DOWN	MOCK	IAA	9.62775	5.99813	-0.682685	0.0005	Haloacid dehalogenase-like hydrolase (HAD) superfamily protein
AT5G65800	5:26330745-26332812	ACS5, ATACS5, CIN5, ETO2	UP	MOCK	IAA	29.3782	45.5622	0.633091	0.00015	ACC synthase 5
AT5G66580	5:26572630-26573408	NA	UP	MOCK	IAA	13.4591	39.8599	1.56636	5e-05	unknown protein; FUNCTIONS IN: molecular_function unknown; INVOLVED IN: N-terminal protein myristoylation; LOCATED IN: cellular_component unknown; BEST Arabidopsis thaliana protein match is: unknown protein (TAIR:AT3G50800.1); Has 1807 Blast hits to 1807 proteins in 277 species: Archae - 0; Bacteria - 0; Metazoa - 736; Fungi - 347; Plants - 385; Viruses - 0; Other Eukaryotes - 339 (source: NCBI B…
AT5G66690	5:26625079-26626793	UGT72E2	DOWN	MOCK	IAA	3.43791	1.74235	-0.980495	0.0001	UDP-Glycosyltransferase superfamily protein
