# Supplementary material for: FRUITFULL Is a Repressor of Apical Hook Opening in Arabidopsis thaliana
Source: Int J Mol Sci. 2020 Sep 3;21(17):6438. doi: 10.3390/ijms21176438 (PMC7504503; doi:10.3390/ijms21176438)
Supplement: Supplementary file 1 [file ijms-21-06438-s001.zip › supplemental files/SUP file 2_IAAmock vs lightdark.xlsx]

## Sheet: ALL
RNA seq				gevestigator	Shoot samples of Col-0 seedlings grown for 4 days in darkness on solid 0.5x Murashige and Skoog medium, then shifted to light (80µmol photons m-2 s-1) for 4h.
Elke				RNA SEQ
GENE ID	GENE ALIAS	LOG2				log value	p value	log barbez OK	p value gv OK	log gv OK	candidate
AT4G37390	AUR3, BRU6, GH3-2, YDK1	4.70297		AT4G37390	YDK1	-2.84539	0.0272632	1	1	1	1
AT2G14960	GH3.1	3.66132		AT2G14960	GH3.1	-1.62134	0.00606277	1	1	1	1
AT4G37770	ACS8	3.49982		AT4G37770	ACS8	-1.56361	0.0772121	1	0	1	0
AT2G23170	GH3.3	3.2251		AT2G23170	GH3.3	-3.6005	0.0165054	1	1	1	1
AT2G22810	ACC4, ACS4, ATACS4	3.12316		AT2G22810	ACS4	-0.00354373	0.980707	1	0	0	0
AT1G15580	ATAUX2-27, IAA5	3.104		AT1G15580	IAA5	-1.28545	0.0615962	1	0	1	0
AT5G52900	MAKR6	2.75171		AT5G52900	MAKR6	-0.0794783	0.736529	1	0	0	0
AT3G62100	IAA30	2.6916		AT3G62100	IAA30	0.32063	0.136016	1	0	0	0
AT3G58190	ASL16, LBD29	2.62305		AT3G58190	LBD29	-1.5717	0.0340732	1	1	1	1
AT1G30100	ATNCED5	2.57812		AT1G30100	NCED5	-0.386252	0.226535	1	0	0	0
AT3G23635	RTFL13	2.37637		AT3G23635	RTFL13	-3.12466	0.0142229	1	1	1	1
AT2G18010	SAUR10	2.2323		AT2G18010		-1.80201	0.0282285	1	1	1	1
AT4G38850	ATSAUR15, SAUR-AC1, SAUR_AC1	2.23202		AT4G38850	SAUR15	-1.80502	0.0282988	1	1	1	1
AT1G29490	SAUR68	2.13575		AT1G29490	SAUR68	-2.51969	0.0165829	1	1	1	1
AT5G54490	PBP1	2.0566		AT5G54490	PBP1	-1.51606	0.0279094	1	1	1	1
AT3G28420	NA	1.98679		AT3G28420		0.831854	0.0209992	1	1	0	0
AT5G47370	HAT2	1.97326		AT5G47370	HAT2	-1.82464	0.00334385	1	1	1	1
AT4G13790	SAUR25	1.95547		AT4G13790		-3.3996	0.0136358	1	1	1	1
AT3G03830	SAUR28	1.93162		AT3G03830		-1.93658	0.00828715	1	1	1	1
AT1G29460	SAUR65	1.92324		AT1G29460	SAUR65	-2.38088	0.00985142	1	1	1	1
AT5G18060	SAUR23	1.8188		AT5G18060	SAUR23	-2.97462	0.0299889	1	1	1	1
AT4G27280	NA	1.81104		AT4G27280		-0.282343	0.525358	1	0	0	0
AT4G14560	AXR5, IAA1	1.7649		AT4G14560	IAA1	-0.954405	0.0263878	1	1	0	0
AT5G18050	SAUR22	1.76061		AT5G18050	SAUR22	-3.07121	0.0110059	1	1	1	1
AT1G29430	SAUR62	1.75606		AT1G29430	SAUR62	-1.38701	0.0164498	1	1	1	1
AT5G18030	NA	1.7376		AT5G18030	SAUR21	-2.55447	0.00438788	1	1	1	1
AT5G18080	SAUR24	1.71989		AT5G18080	SAUR24	-2.71916	0.00138127	1	1	1	1
AT4G10150	NA	1.70076		AT4G10150	ATL7	-2.64546	0.00670167	1	1	1	1
AT4G25420	AT2301, ATGA20OX1, GA5	1.69402		AT4G25420	GA20OX1	-0.185693	0.520734	1	0	0	0
AT3G03820	SAUR29	1.685		AT3G03820	SAUR29	-1.22276	0.0106883	1	1	1	1
AT1G52830	IAA6, SHY1	1.68483		AT1G52830	IAA6	-2.95631	0.0124294	1	1	1	1
AT4G21200	ATGA2OX8	1.65974		AT4G21200	GA2OX8	0.542957	0.442296	1	0	0	0
AT5G51190	NA	1.65893		AT5G51190	ERF105	-0.0451884	0.933816	1	0	0	0
AT5G18010	SAUR19	1.61193		AT5G18010	SAUR19	-2.62795	0.00203624	1	1	1	1
AT3G03840	SAUR27	1.60584		AT3G03840	SAUR27	-1.3418	0.0205565	1	1	1	1
AT1G29500	SAUR66	1.60191		AT1G29500	SAUR66	-1.80051	0.00204551	1	1	1	1
AT3G03850	SAUR26	1.56649		AT3G03850	SAUR26	-1.58897	0.052568	1	0	1	0
AT5G66580	NA	1.56636		AT5G66580		-1.27118	0.120871	1	0	1	0
AT2G42430	ASL18, LBD16	1.55508		AT2G42430	LBD16	-1.0741	0.0701518	1	0	1	0
AT1G04610	YUC3	1.49514		AT1G04610	YUC3	-1.96937	0.0499019	1	1	1	1
AT4G38825	SAUR13	1.46232		AT4G38825	SAUR13	-3.10756	0.00348935	1	1	1	1
AT3G50770	CML41	1.45911		AT3G50770	CML41	-0.564665	0.368647	1	0	0	0
AT3G23030	IAA2	1.43983		AT3G23030	IAA2	-1.3734	0.0193898	1	1	1	1
AT1G29440	SAUR63	1.4062		AT1G29440	SAUR63	-1.39627	0.00828036	1	1	1	1
AT5G18930	BUD2, SAMDC4	1.39172		AT5G18930	SAMDC4	0.192446	0.297022	1	0	0	0
AT3G42800	NA	1.36822		AT3G42800		-0.921008	0.0469869	1	1	0	0
AT1G29450	SAUR64	1.35116		AT1G29450	SAUR64	-1.78074	0.00217345	1	1	1	1
AT3G50665	NA	1.33365		AT3G50665		-0.0279808	0.977276	1	0	0	0
AT4G36110	SAUR9	1.32261		AT4G36110		-2.11829	0.0428734	1	1	1	1
AT3G51410	NA	1.30752		AT3G51410		-1.47855	0.091159	1	0	1	0
AT1G75490	NA	1.30332		AT1G75490	DREB2D	0.0630238	0.948867	1	0	0	0
AT3G28857	PRE5	1.26332		AT3G28857	PRE5	-2.83767	0.0460216	1	1	1	1
AT4G14819	NA	1.26062		AT4G14819		-1.08322	0.00698221	1	1	1	1
AT4G32280	IAA29	1.23426		AT4G32280	IAA29	-2.23894	0.0318614	1	1	1	1
AT5G39240	NA	1.22976		AT5G39240		-3.08583	0.0513464	1	0	1	0
AT5G15830	ATbZIP3	1.21668		AT5G15830	AtbZIP3	-1.20767	0.115035	1	0	1	0
AT1G31880	BRX, NLM9	1.21119		AT1G31880	BRX	-0.391439	0.294489	1	0	0	0
AT3G50800	NA	1.18706		AT3G50800		-1.3224	0.0569712	1	0	1	0
AT1G13245	DVL4, RTFL17	1.1868		AT1G13245	RTFL17	-0.587714	0.3076	1	0	0	0
AT1G54120	NA	1.18358		AT1G54120		-1.51015	0.0421248	1	1	1	1
AT5G18020	SAUR20	1.15934		AT5G18020	SAUR20	-1.86533	0.0044531	1	1	1	1
AT2G42380	ATBZIP34	1.15474		AT2G42380	BZIP34	-0.019011	0.886571	1	0	0	0
AT3G07000	NA	1.15162		AT3G07000		-0.397762	0.448168	1	0	0	0
AT1G29510	SAUR67	1.14964		AT1G29510	SAUR67	-1.56536	0.00363781	1	1	1	1
AT5G58750	NA	1.08035		AT5G58750		-0.143769	0.230791	1	0	0	0
AT5G62280	NA	1.07463		AT5G62280		-1.72554	0.0317048	1	1	1	1
AT4G37890	EDA40	1.07285		AT4G37890	EDA40	-1.26497	0.0676424	1	0	1	0
AT3G15540	IAA19, MSG2	1.06916		AT3G15540	IAA19	-2.89253	0.0085668	1	1	1	1
AT5G54510	DFL1, GH3.6	1.06777		AT5G54510	GH3.6	1.23199	0.277643	1	0	0	0
AT5G12050	NA	1.06761		AT5G12050		-0.2274	0.342985	1	0	0	0
AT2G35930	ATPUB23	1.05626		AT2G35930	PUB23	0.175391	0.345883	1	0	0	0
AT4G37895	NA	1.04813		AT4G37895		-0.803137	0.0488191	1	1	0	0
AT2G01200	IAA32, MEE10	1.01569		AT2G01200	IAA32	-0.629372	0.214822	1	0	0	0
AT5G25190	ESE3	0.988919		AT5G25190	ERF003	-0.781985	0.0334255	0	1	0	0
AT5G39860	BHLH136, BNQ1, PRE1	0.988589		AT5G39860	PRE1	-2.09356	0.017401	0	1	1	0
AT4G21745	NA	0.9838		AT4G21745	RIC11	-2.37574	0.0174302	0	1	1	0
AT1G69572	NA	0.98237		AT1G69572		-0.819063	0.38265	0	0	0	0
AT5G53020	NA	0.95758		AT5G53020		0.0311339	0.578717	0	0	0	0
AT3G25710	ATAIG1, BHLH32, TMO5	0.944941		AT3G25710	BHLH32	0.106027	0.725973	0	0	0	0
AT4G27260	GH3.5, WES1	0.942576		AT4G27260	GH3.5	-1.76296	0.213211	0	0	1	0
AT5G09970	CYP78A7	0.929778		AT5G09970	CYP78A7	-1.07152	0.306761	0	0	1	0
AT3G06990	NA	0.928202		AT3G06990		-0.441418	0.360457	0	0	0	0
AT3G25717	DVL6, RTFL16	0.924268		AT3G25717	RTFL16	-1.55529	0.0261382	0	1	1	0
AT5G41400	NA	0.921769		AT5G41400		0.656898	0.235713	0	0	0	0
AT3G59900	ARGOS	0.906879		AT3G59900	ARGOS	-1.07714	0.117333	0	0	1	0
AT1G80240	DGR1	0.90122		AT1G80240		-3.35021	0.00110926	0	1	1	0
AT1G78100	AUF1	0.895609		AT1G78100		0.000572205	0.997434	0	0	0	0
AT5G44260	ATTZF5	0.887793		AT5G44260		-3.85326	0.065505	0	0	1	0
AT4G17460	HAT1, JAB	0.879493		AT4G17460	HAT1	-1.54448	0.00979454	0	1	1	0
AT3G29370	P1R3	0.87116		AT3G29370		-2.26836	0.00437097	0	1	1	0
AT5G53830	NA	0.866884		AT5G53830	VQ33	-0.474593	0.402894	0	0	0	0
AT1G32190	NA	0.864168		AT1G32190		0.234257	0.672438	0	0	0	0
AT5G43700	ATAUX2-11, IAA4	0.863461		AT5G43700	IAA4	-0.888839	0.0226129	0	1	0	0
AT3G50890	ATHB28, ZHD7	0.857412		AT3G50890	ZHD7	-0.961543	0.234339	0	0	0	0
AT4G34770	SAUR1	0.848475		AT4G34770		-1.5962	0.126049	0	0	1	0
AT1G76240	NA	0.824484		AT1G76240		-2.96483	0.00919019	0	1	1	0
AT3G20830	AGC2-4, UCNL	0.822266		AT3G20830	UCNL	-1.41191	0.0733363	0	0	1	0
AT5G46240	ATKAT1	0.820244		AT5G46240	KAT1	-0.843172	0.262818	0	0	0	0
AT5G54630	NA	0.810653		AT5G54630		0.640241	0.225827	0	0	0	0
AT1G13670	NA	0.810507		AT1G13670		2.09854	0.00712623	0	1	0	0
AT1G65920	NA	0.79929		AT1G65920		-0.970765	0.160913	0	0	0	0
AT4G21740	NA	0.787889		AT4G21740		-0.272145	0.342566	0	0	0	0
AT1G44830	NA	0.779793		AT1G44830	ERF014	-2.19178	0.0769153	0	0	1	0
AT1G18570	ATMYB51, BW51A, BW51B, HIG1	0.771777		AT1G18570	MYB51	-0.649403	0.150767	0	0	0	0
AT5G63160	BT1	0.771169		AT5G63160	BT1	-0.442446	0.738736	0	0	0	0
AT3G50350	NA	0.765544		AT3G50350		-0.218116	0.757655	0	0	0	0
AT4G00050	UNE10	0.761925		AT4G00050	UNE10	2.33942	0.0906812	0	0	0	0
AT1G18400	BEE1	0.75844		AT1G18400	BEE1	-0.47318	0.203847	0	0	0	0
AT5G11550	NA	0.757792		AT5G11550		0.168361	0.768736	0	0	0	0
AT5G18070	DRT101	0.751576		AT5G18070	DRT101	-0.314308	0.0589675	0	0	0	0
AT1G26945	KDR, PRE6	0.747663		AT1G26945	PRE6	-1.51092	0.0359066	0	1	1	0
AT4G09890	NA	0.742864		AT4G09890		-0.994868	0.00110926	0	1	1	0
AT3G06870	NA	0.740515		AT3G06870		-0.925377	0.010601	0	1	0	0
AT5G49700	AHL17	0.737982		AT5G49700	AHL17	-0.205251	0.636204	0	0	0	0
AT4G28640	IAA11	0.728981		AT4G28640	IAA11	-0.381258	0.414604	0	0	0	0
AT4G38860	SAUR16	0.728168		AT4G38860		-2.06613	0.0275906	0	1	1	0
AT5G01215	NA	0.726239		AT5G01215		-0.684181	0.123223	0	0	0	0
AT5G15580	LNG1, TRM2	0.723205		AT5G15580	LNG1	-1.96498	0.00377801	0	1	1	0
AT3G61460	BRH1	0.718088		AT3G61460	BRH1	-0.989964	0.073488	0	0	0	0
AT3G13810	ATIDD11	0.715324		AT3G13810	IDD11	-0.0196357	0.891571	0	0	0	0
AT4G27460	CBSX5	0.701154		AT4G27460	CBSX5	-2.02245	0.132055	0	0	1	0
AT1G67900	NA	0.698932		AT1G67900		0.893806	0.214492	0	0	0	0
AT2G46990	IAA20	0.695733		AT2G46990	IAA20	-2.10797	0.0695482	0	0	1	0
AT3G50330	HEC2	0.690089		AT3G50330	HEC2	-2.00543	0.134674	0	0	1	0
AT5G51670	NA	0.68094		AT5G51670		-0.691143	0.289337	0	0	0	0
AT2G26710	BAS1, CYP72B1, CYP734A1	0.680537		AT2G26710	CYP734A1	-0.493078	0.0942605	0	0	0	0
AT2G17880	DJC24	0.680085		AT2G17880		-1.22307	0.31422	0	0	1	0
AT3G26510	NA	0.679525		AT3G26510		-1.66242	0.0313755	0	1	1	0
AT3G13980	NA	0.671712		AT3G13980		-0.360674	0.356621	0	0	0	0
AT5G52550	NA	0.667029		AT5G52550		-0.225963	0.12729	0	0	0	0
AT1G27670	NA	0.660677		AT1G27670		-1.59625	0.0142177	0	1	1	0
AT4G03400	DFL2, GH3-10	0.655032		AT4G03400	DFL2	0.702208	0.0566659	0	0	0	0
AT5G26960	NA	0.645645		AT5G26960		-0.796064	0.0817975	0	0	0	0
AT4G32350	NA	0.639899		AT4G32350		-0.441904	0.112134	0	0	0	0
AT2G39870	NA	0.637979		AT2G39870		-0.527201	0.241312	0	0	0	0
AT5G50915	NA	0.637448		AT5G50915	BHLH137	-1.2136	0.0761923	0	0	1	0
AT5G65800	ACS5, ATACS5, CIN5, ETO2	0.633091		AT5G65800	ACS5	-3.89715	0.0251788	0	1	1	0
AT4G34760	SAUR50	0.631571		AT4G34760		-1.13605	0.00507399	0	1	1	0
AT5G04190	PKS4	0.627098		AT5G04190	PKS4	-0.550385	0.307307	0	0	0	0
AT3G13360	WIP3	0.623134		AT3G13360	WIP3	-0.427156	0.0301078	0	1	0	0
AT3G61490	NA	0.621662		AT3G61490		0.750319	0.469958	0	0	0	0
AT4G37590	MEL1, NPY5	0.617876		AT4G37590	NPY5	0.111505	0.496983	0	0	0	0
AT2G28350	ARF10	0.617638		AT2G28350	ARF10	-0.157619	0.64597	0	0	0	0
AT4G24275	NA	0.616247		AT4G24275		-1.29736	0.0356463	0	1	1	0
AT1G18870	ATICS2	0.614558		AT1G18870	ICS2	2.37713	0.102365	0	0	0	0
AT1G51170	AGC2-3, UCN	0.613421		AT1G51170	UNC	-1.05566	0.0703926	0	0	1	0
AT4G13830	DJC26, J20	0.610988		AT4G13830	ATJ20	-0.885972	0.237067	0	0	0	0
AT4G36540	BEE2	0.608054		AT4G36540	BEE2	0.226663	0.134544	0	0	0	0
AT3G60390	HAT3	0.607334		AT3G60390	HAT3	-1.02651	0.0593263	0	0	1	0
AT2G40610	ATEXP8, ATEXPA8, ATHEXP ALPHA 1.11	0.593253		AT2G40610	EXPA8	-1.28656	0.0153218	0	1	1	0
AT3G26740	CCL	0.589741		AT3G26740	CCL	-0.650673	0.544732	0	0	0	0
AT5G04770	ATCAT6	0.589316		AT5G04770	CAT6	-0.774661	0.390499	0	0	0	0
AT4G22780	ACR7	0.587813		AT4G22780	ACR7	-1.3139	0.140348	0	0	1	0
AT2G28200	NA	0.585906		AT2G28200	ZAT5	-1.31052	0.0204202	0	1	1	0
AT5G22310	NA	0.585323		AT5G22310		-1.86887	0.0512807	0	0	1	0
AT2G46810	NA	0.569686		AT2G46810	BHLH70	0.795496	0.110522	0	0	0	0
AT1G80180	NA	0.569329		AT1G80180		-0.55769	0.628	0	0	0	0
AT1G19376	NA	0.566213		AT1G19376		0.883464	0.209115	0	0	0	0
AT5G57180	CIA2	0.549308		AT5G57180	CIA2	1.31652	0.213325	0	0	0	0
AT2G25450	NA	-0.595354		AT2G25450	GSL-OH	0.956146	0.389484	0	0	0	0
AT3G11964	RRP5	-0.613512		AT3G11964		0.179389	0.560744	0	0	0	0
AT3G53480	ABCG37, ATPDR9, PIS1	-0.614182		AT3G53480	ABCG37	-1.03286	0.0966912	0	0	0	0
AT1G65440	GTB1	-0.620075		AT1G65440	GTB1	-0.0364351	0.946174	0	0	0	0
AT3G13080	ABCC3, ATMRP3	-0.625528		AT3G13080	ABCC3	0.228696	0.439733	0	0	0	0
AT5G64100	NA	-0.6298		AT5G64100	PER69	-1.49187	0.259832	0	0	0	0
AT4G30990	NA	-0.644135		AT4G30990		-0.0765867	0.807691	0	0	0	0
AT5G17460	NA	-0.649645		AT5G17460		0.530218	0.528622	0	0	0	0
AT4G05020	NDB2	-0.650246		AT4G05020	NDB2	-0.13105	0.766673	0	0	0	0
AT4G23560	ATGH9B15	-0.657473		AT4G23560	AtGH9B15	-0.684173	0.632663	0	0	0	0
AT4G37800	XTH7	-0.669197		AT4G37800	XTH7	5.00322	0.0472524	0	1	1	0
AT1G56110	NOP56	-0.670309		AT1G56110	NOP56	0.306905	0.338638	0	0	0	0
AT4G30650	NA	-0.674248		AT4G30650		-0.151006	0.919624	0	0	0	0
AT1G48920	ATNUC-L1, PARL1	-0.677986		AT1G48920	NUCL1	0.196387	0.185335	0	0	0	0
AT1G05680	UGT74E2	-0.679725		AT1G05680	UGT74E2	0.494924	0.362438	0	0	0	0
AT5G65140	TPPJ	-0.682685		AT5G65140	TPPJ	-0.868185	0.190496	0	0	0	0
AT3G22840	ELIP, ELIP1	-0.693056		AT3G22840	ELIP1	5.81313	0.0526136	0	0	1	0
AT3G11410	AHG3, ATPP2CA	-0.695313		AT3G11410	PP2CA	0.48177	0.49428	0	0	0	0
AT3G20500	ATPAP18	-0.696841		AT3G20500	PAP18	0.373838	0.368668	0	0	0	0
AT3G55160	NA	-0.710562		AT3G55160		0.430401	0.202783	0	0	0	0
AT1G73260	ATKTI1	-0.716567		AT1G73260	ATKTI1	-1.03135	0.474949	0	0	0	0
AT5G26340	ATSTP13, MSS1	-0.731166		AT5G26340	STP13	-0.663559	0.0224919	0	1	0	0
AT4G30140	CDEF1	-0.734263		AT4G30140	CDEF1	-0.615548	0.690695	0	0	0	0
AT2G27840	HD2D, HDA13, HDT04, HDT4	-0.736986		AT2G27840	HDT4	0.282423	0.731531	0	0	0	0
AT3G07215	NA	-0.737145		AT3G07215		-0.214605	0.591594	0	0	0	0
AT4G39070	BBX20, BZS1	-0.745439		AT4G39070	BBX20	-1.57114	0.0162244	0	1	0	0
AT3G06530	NA	-0.748451		AT3G06530		0.579664	0.128625	0	0	0	0
AT5G07920	ATDGK1	-0.749767		AT5G07920	DGK1	-0.168251	0.564143	0	0	0	0
AT1G50240	FU	-0.752188		AT1G50240	TIO	0.119801	0.131705	0	0	0	0
AT1G01140	CIPK9, PKS6, SnRK3.12	-0.752261		AT1G01140	CIPK9	-0.413582	0.266799	0	0	0	0
AT1G66970	GDPDL1, SVL2	-0.753931		AT1G66970	GDPDL1	2.31728	0.00166041	0	1	1	0
AT5G08640	ATFLS1	-0.754497		AT5G08640	FLS1	3.43385	0.145777	0	0	1	0
AT3G56080	NA	-0.754523		AT3G56080		2.00812	0.00607752	0	1	1	0
AT3G07050	NSN1	-0.767581		AT3G07050	NSN1	-0.198142	0.4571	0	0	0	0
AT4G13850	ATGRP2, GR-RBP2	-0.772432		AT4G13850	RBG2	0.120491	0.595199	0	0	0	0
AT1G40104	NA	-0.776162		AT1G40104		0	1	0	0	0	0
AT1G10657	NA	-0.789545		AT1G10657		2.58584	0.118126	0	0	1	0
AT1G12610	DDF1	-0.800125		AT1G12610	DREB1F	0.00520724	0.968006	0	0	0	0
AT2G46740	ATGulLO5	-0.808166		AT2G46740	GULLO5	-1.11903	0.077087	0	0	0	0
AT4G24960	ATHVA22D	-0.822024		AT4G24960	HVA22D	0.799794	0.128495	0	0	0	0
AT1G79245	NA	-0.856769		AT1G79245		0.422297	0.363869	0	0	0	0
AT3G22310	ATRH9, PMH1	-0.857904		AT3G22310	RH9	0.49803	0.114574	0	0	0	0
AT1G02520	ABCB11, MDR8, PGP11	-0.871014		AT1G02520	ABCB11	-0.37898	0.0744915	0	0	0	0
AT2G06950	NA	-0.87549		AT2G06950		-0.234669	0.583543	0	0	0	0
AT2G01890	ATPAP8	-0.883456		AT2G01890	PAP8	1.22895	0.0187125	0	1	1	0
AT5G43580	UPI	-0.895928		AT5G43580		-0.174351	0.86376	0	0	0	0
AT4G27010	EMB2788	-0.90271		AT4G27010		0.487501	0.132338	0	0	0	0
AT5G52310	COR78, LTI140, LTI78, RD29A	-0.9062		AT5G52310	LTI78	2.03976	0.0446029	0	1	1	0
AT3G44750	ATHD2A, HDA3, HDT1	-0.909576		AT3G44750	HDT1	0.497089	0.451266	0	0	0	0
AT2G20723	NA	-0.910999		AT2G20723		0.162108	0.85678	0	0	0	0
AT3G13525	NA	-0.914761		AT3G13525		-0.700622	0.42304	0	0	0	0
AT3G05660	ATRLP33	-0.917395		AT3G05660	AtRLP33	-0.717538	0.316328	0	0	0	0
AT3G14770	ATSWEET2	-0.918973		AT3G14770	SWEET2	0.378143	0.787501	0	0	0	0
AT4G22380	NA	-0.934931		AT4G22380		0.331525	0.304097	0	0	0	0
AT4G25630	ATFIB2	-0.97278		AT4G25630	MED36A	0.303956	0.651875	0	0	0	0
AT1G29395	COR413-TM1, COR413IM1, COR414-TM1	-0.976755		AT1G29395	COR413IM1	-2.04899	0.18374	0	0	0	0
AT5G66690	UGT72E2	-0.980495		AT5G66690	UGT72E2	-1.39328	0.380204	0	0	0	0
AT3G50970	LTI30, XERO2	-0.990561		AT3G50970	XERO2	1.4468	0.339311	0	0	1	0
AT3G61220	SDR1	-0.993096		AT3G61220	SDR1	4.14828	0.0119353	0	1	1	0
AT2G36120	DOT1	-0.996499		AT2G36120	DOT1	-0.480436	0.0183851	0	1	0	0
AT4G28780	NA	-0.997301		AT4G28780		2.76063	0.0235653	0	1	1	0
AT3G01190	NA	-1.00844		AT3G01190	PER27	-0.372674	0.510884	1	0	0	0
AT1G78340	ATGSTU22	-1.01357		AT1G78340	GSTU22	0.0213343	0.954732	1	0	0	0
AT4G39675	NA	-1.02758		AT4G39675		-0.959426	0.556982	1	0	0	0
AT3G01313	NA	-1.02825		AT3G01313		-0.376796	0.595413	1	0	0	0
AT3G04070	anac047, NAC047	-1.05948		AT3G04070	anac047	-0.116674	0.89735	1	0	0	0
AT5G17850	NA	-1.06191		AT5G17850	CCX2	-0.643878	0.214451	1	0	0	0
AT2G43610	NA	-1.0806		AT2G43610		-0.870733	0.104469	1	0	0	0
AT3G03920	NA	-1.10675		AT3G03920		0.23518	0.345625	1	0	0	0
AT5G03552	MIR822A	-1.1094		AT5G03552	MIR822A	-1.96665	0.0379636	1	1	0	0
AT2G45220	PME17	-1.14807		AT2G45220	PME17	-0.730114	0.0941407	1	0	0	0
AT1G31580	CXC750, ECS1	-1.19776		AT1G31580	ECS1	4.38306	0.0321155	1	1	1	1
AT1G21520	NA	-1.20887		AT1G21520		-1.0621	0.242078	1	0	0	0
AT1G67120	ATMDN1	-1.26433		AT1G67120		0.428143	0.49471	1	0	0	0
AT5G24280	GMI1	-1.28437		AT5G24280	GMI1	0.0785528	0.830434	1	0	0	0
AT3G44300	ATNIT2	-1.32476		AT3G44300	NIT2	-0.305079	0.82517	1	0	0	0
AT1G61275	U12	-1.52188		AT1G61275	U12	-0.311823	0.753308	1	0	0	0
AT4G37030	NA	-1.61824		AT4G37030		0.00858271	0.97126	1	0	0	0
AT3G18610	ATNUC-L2, PARLL1	-2.42333		AT3G18610	NUCL2	-0.00268435	0.990215	1	0	0	0
AT5G13210	NA	-2.75124		AT5G13210		-0.278016	0.596702	1	0	0	0
AT2G18193	NA	-3.18554		AT2G18193		-0.466067	0.569414	1	0	0	0
AT3G01600	anac044, NAC044	-3.49843		AT3G01600	anac044	0.126041	0.781266	1	0	0	0

## Sheet: selected overlap
RNA seq				gevestigator	Shoot samples of Col-0 seedlings grown for 4 days in darkness on solid 0.5x Murashige and Skoog medium, then shifted to light (80µmol photons m-2 s-1) for 4h.
Elke				RNA SEQ
GENE ID	GENE ALIAS	LOG2				log value	p value	log barbez OK	p value gv OK	log gv OK	candidate
AT4G37390	AUR3, BRU6, GH3-2, YDK1	4.70297		AT4G37390	YDK1	-2.84539	0.0272632	1	1	1	1
AT2G14960	GH3.1	3.66132		AT2G14960	GH3.1	-1.62134	0.00606277	1	1	1	1
AT2G23170	GH3.3	3.2251		AT2G23170	GH3.3	-3.6005	0.0165054	1	1	1	1
AT3G58190	ASL16, LBD29	2.62305		AT3G58190	LBD29	-1.5717	0.0340732	1	1	1	1
AT3G23635	RTFL13	2.37637		AT3G23635	RTFL13	-3.12466	0.0142229	1	1	1	1
AT2G18010	SAUR10	2.2323		AT2G18010		-1.80201	0.0282285	1	1	1	1
AT4G38850	ATSAUR15, SAUR-AC1, SAUR_AC1	2.23202		AT4G38850	SAUR15	-1.80502	0.0282988	1	1	1	1
AT1G29490	SAUR68	2.13575		AT1G29490	SAUR68	-2.51969	0.0165829	1	1	1	1
AT5G54490	PBP1	2.0566		AT5G54490	PBP1	-1.51606	0.0279094	1	1	1	1
AT5G47370	HAT2	1.97326		AT5G47370	HAT2	-1.82464	0.00334385	1	1	1	1
AT4G13790	SAUR25	1.95547		AT4G13790		-3.3996	0.0136358	1	1	1	1
AT3G03830	SAUR28	1.93162		AT3G03830		-1.93658	0.00828715	1	1	1	1
AT1G29460	SAUR65	1.92324		AT1G29460	SAUR65	-2.38088	0.00985142	1	1	1	1
AT5G18060	SAUR23	1.8188		AT5G18060	SAUR23	-2.97462	0.0299889	1	1	1	1
AT5G18050	SAUR22	1.76061		AT5G18050	SAUR22	-3.07121	0.0110059	1	1	1	1
AT1G29430	SAUR62	1.75606		AT1G29430	SAUR62	-1.38701	0.0164498	1	1	1	1
AT5G18030	NA	1.7376		AT5G18030	SAUR21	-2.55447	0.00438788	1	1	1	1
AT5G18080	SAUR24	1.71989		AT5G18080	SAUR24	-2.71916	0.00138127	1	1	1	1
AT4G10150	NA	1.70076		AT4G10150	ATL7	-2.64546	0.00670167	1	1	1	1
AT3G03820	SAUR29	1.685		AT3G03820	SAUR29	-1.22276	0.0106883	1	1	1	1
AT1G52830	IAA6, SHY1	1.68483		AT1G52830	IAA6	-2.95631	0.0124294	1	1	1	1
AT5G18010	SAUR19	1.61193		AT5G18010	SAUR19	-2.62795	0.00203624	1	1	1	1
AT3G03840	SAUR27	1.60584		AT3G03840	SAUR27	-1.3418	0.0205565	1	1	1	1
AT1G29500	SAUR66	1.60191		AT1G29500	SAUR66	-1.80051	0.00204551	1	1	1	1
AT1G04610	YUC3	1.49514		AT1G04610	YUC3	-1.96937	0.0499019	1	1	1	1
AT4G38825	SAUR13	1.46232		AT4G38825	SAUR13	-3.10756	0.00348935	1	1	1	1
AT3G23030	IAA2	1.43983		AT3G23030	IAA2	-1.3734	0.0193898	1	1	1	1
AT1G29440	SAUR63	1.4062		AT1G29440	SAUR63	-1.39627	0.00828036	1	1	1	1
AT1G29450	SAUR64	1.35116		AT1G29450	SAUR64	-1.78074	0.00217345	1	1	1	1
AT4G36110	SAUR9	1.32261		AT4G36110		-2.11829	0.0428734	1	1	1	1
AT3G28857	PRE5	1.26332		AT3G28857	PRE5	-2.83767	0.0460216	1	1	1	1
AT4G14819	NA	1.26062		AT4G14819		-1.08322	0.00698221	1	1	1	1
AT4G32280	IAA29	1.23426		AT4G32280	IAA29	-2.23894	0.0318614	1	1	1	1
AT1G54120	NA	1.18358		AT1G54120		-1.51015	0.0421248	1	1	1	1
AT5G18020	SAUR20	1.15934		AT5G18020	SAUR20	-1.86533	0.0044531	1	1	1	1
AT1G29510	SAUR67	1.14964		AT1G29510	SAUR67	-1.56536	0.00363781	1	1	1	1
AT5G62280	NA	1.07463		AT5G62280		-1.72554	0.0317048	1	1	1	1
AT3G15540	IAA19, MSG2	1.06916		AT3G15540	IAA19	-2.89253	0.0085668	1	1	1	1
AT1G31580	CXC750, ECS1	-1.19776		AT1G31580	ECS1	4.38306	0.0321155	1	1	1	1

## Sheet: seqENRICH output
At1g01030-binding-motif	21	39	6887	33602	3.47314e-06	AT1G31580	AT1G29450	AT1G29430	AT1G29440	AT1G29490	AT1G29500	AT1G29510	AT1G54120	AT2G18010	AT3G28857	AT3G03830	AT3G58190	AT4G10150	AT4G36110	AT4G38825	AT5G18030	AT5G18050	AT5G18010	AT5G18080	AT5G54490	AT5G47370
At1g51140-binding-motif	10	39	3204	33602	0.00214856	AT1G52830	AT1G29430	AT1G29440	AT1G29510	AT4G38850	AT4G37390	AT4G13790	AT4G38825	AT5G18080	AT5G62280
At3g30210-binding-motif	12	39	4537	33602	0.00284617	AT1G52830	AT1G29460	AT1G29440	AT1G29500	AT1G29510	AT2G18010	AT2G14960	AT3G58190	AT4G36110	AT4G14819	AT5G18010	AT5G18080
AT5G60910-binding-motif	17	39	8147	33602	0.00390718	AT1G31580	AT1G29430	AT1G29490	AT1G04610	AT2G18010	AT3G23030	AT3G03840	AT4G38850	AT4G32280	AT5G18030	AT5G18050	AT5G18010	AT5G18020	AT5G18060	AT5G18080	AT5G47370	AT5G62280
At1g74370-binding-motif	25	39	14442	33602	0.00391744	AT1G29460	AT1G29440	AT1G29490	AT1G29500	AT1G29510	AT1G04610	AT2G14960	AT3G23030	AT3G28857	AT3G03830	AT3G03820	AT3G15540	AT3G23635	AT4G38850	AT4G10150	AT4G32280	AT4G13790	AT4G36110	AT4G14819	AT4G38825	AT5G18050	AT5G18060	AT5G54490	AT5G47370	AT5G62280
AT3G24120-binding-motif	16	39	7521	33602	0.00439067	AT1G29460	AT1G29440	AT1G29490	AT1G29500	AT1G29510	AT2G23170	AT3G23030	AT3G03830	AT3G03820	AT3G15540	AT3G23635	AT4G10150	AT4G37390	AT4G32280	AT5G18010	AT5G54490
AT1G19850-Binding-motif	8	39	2451	33602	0.00469149	AT1G31580	AT1G52830	AT1G04610	AT3G03830	AT3G03820	AT3G15540	AT3G23635	AT4G13790
AT5G65310-binding-motif	20	39	11252	33602	0.00933067	AT1G31580	AT1G29460	AT1G29500	AT1G04610	AT2G23170	AT2G18010	AT2G14960	AT3G23030	AT3G28857	AT3G03840	AT3G03820	AT3G58190	AT3G23635	AT4G10150	AT4G32280	AT4G14819	AT5G18060	AT5G54490	AT5G47370	AT5G62280
General-RAV-binding-motif	38	39	28489	33602	0.011171	AT1G52830	AT1G29460	AT1G29450	AT1G29430	AT1G29440	AT1G29490	AT1G29500	AT1G29510	AT1G04610	AT1G54120	AT2G23170	AT2G18010	AT2G14960	AT3G23030	AT3G28857	AT3G03840	AT3G03830	AT3G03820	AT3G58190	AT3G15540	AT3G23635	AT4G38850	AT4G10150	AT4G37390	AT4G32280	AT4G13790	AT4G36110	AT4G14819	AT4G38825	AT5G18030	AT5G18050	AT5G18010	AT5G18020	AT5G18060	AT5G18080	AT5G54490	AT5G47370	AT5G62280
At5g49300-binding-motif	9	39	3693	33602	0.0150459	AT1G29490	AT3G03840	AT3G58190	AT4G37390	AT5G18030	AT5G18020	AT5G18060	AT5G18080	AT5G47370
General-PLATZ-binding-motif	10	39	4381	33602	0.015668	AT1G29490	AT2G23170	AT3G28857	AT3G03840	AT3G03830	AT4G36110	AT5G18010	AT5G18080	AT5G54490	AT5G62280
AT3G04030-binding-motif	8	39	3096	33602	0.0159287	AT1G29460	AT1G29440	AT1G29500	AT1G29510	AT2G23170	AT3G03830	AT4G32280	AT5G54490
AT1G34370-binding-motif	16	39	8949	33602	0.0194502	AT1G31580	AT1G52830	AT1G29500	AT3G28857	AT3G03840	AT3G03820	AT4G38850	AT4G32280	AT4G13790	AT4G36110	AT4G38825	AT5G18030	AT5G18020	AT5G18060	AT5G18080	AT5G47370
At1g25340-binding-motif	5	39	1526	33602	0.0228577	AT1G29440	AT1G29500	AT1G29510	AT2G14960	AT4G10150
At3g01530-binding-motif	12	39	6146	33602	0.0234262	AT1G52830	AT1G29430	AT1G29440	AT1G29500	AT1G29510	AT2G18010	AT2G14960	AT3G58190	AT4G10150	AT4G36110	AT5G18050	AT5G18010
General-ARF-Binding-motif	22	39	14055	33602	0.0239645	AT1G31580	AT1G29460	AT1G29450	AT1G29430	AT1G29440	AT1G29500	AT1G29510	AT2G23170	AT3G23030	AT3G03830	AT3G58190	AT3G23635	AT4G38850	AT4G37390	AT4G36110	AT5G18030	AT5G18050	AT5G18010	AT5G18020	AT5G18080	AT5G47370	AT5G62280
AT2G20400-binding-motif	2	39	224	33602	0.0256493	AT2G23170	AT5G54490
At1g70910-binding-motif	13	39	7096	33602	0.028252	AT1G29460	AT1G29450	AT1G29430	AT1G29440	AT1G29510	AT3G03840	AT3G03830	AT3G03820	AT4G10150	AT4G13790	AT4G36110	AT5G18050	AT5G18020
At5g40330-binding-motif	28	39	19859	33602	0.0360848	AT1G31580	AT1G52830	AT1G29460	AT1G29430	AT1G29440	AT1G29490	AT1G29500	AT1G29510	AT1G04610	AT2G23170	AT2G14960	AT3G23030	AT3G03840	AT3G03830	AT3G03820	AT3G23635	AT4G38850	AT4G10150	AT4G37390	AT4G32280	AT4G13790	AT4G14819	AT4G38825	AT5G18050	AT5G18010	AT5G18060	AT5G18080	AT5G54490
At3g28910-binding-motif	23	39	15594	33602	0.0374402	AT1G52830	AT1G29450	AT1G29430	AT1G29440	AT1G29490	AT1G29500	AT1G29510	AT1G54120	AT2G23170	AT2G14960	AT3G23030	AT3G03840	AT3G15540	AT4G10150	AT4G37390	AT4G32280	AT5G18030	AT5G18050	AT5G18010	AT5G18060	AT5G18080	AT5G54490	AT5G62280
General-GEBP-like-binding-motif	9	39	4463	33602	0.0378785	AT1G31580	AT1G29460	AT3G28857	AT3G03840	AT4G36110	AT4G38825	AT5G18020	AT5G54490	AT5G47370
General-SBP-box-binding-motif	13	39	7515	33602	0.0393739	AT1G31580	AT1G52830	AT1G29430	AT2G23170	AT3G03840	AT3G03830	AT3G58190	AT4G32280	AT4G13790	AT4G36110	AT4G38825	AT5G18030	AT5G62280
General-GRAS-binding-motif	29	39	20991	33602	0.0417952	AT1G31580	AT1G29460	AT1G29450	AT1G29440	AT1G29490	AT1G29500	AT1G29510	AT1G54120	AT2G23170	AT2G18010	AT3G28857	AT3G03830	AT3G03820	AT3G58190	AT3G23635	AT4G38850	AT4G10150	AT4G32280	AT4G13790	AT4G36110	AT4G38825	AT5G18030	AT5G18050	AT5G18010	AT5G18020	AT5G18060	AT5G18080	AT5G47370	AT5G62280
At5g58900-binding-motif	28	39	20170	33602	0.0433531	AT1G31580	AT1G29460	AT1G29450	AT1G29440	AT1G29500	AT1G29510	AT1G04610	AT1G54120	AT2G18010	AT2G14960	AT3G23030	AT3G28857	AT3G03840	AT3G03830	AT3G03820	AT3G23635	AT4G10150	AT4G37390	AT4G13790	AT4G14819	AT4G38825	AT5G18030	AT5G18050	AT5G18010	AT5G18020	AT5G18060	AT5G18080	AT5G47370
At1g01060-binding-motif	13	39	7679	33602	0.0442531	AT1G52830	AT1G04610	AT3G23030	AT3G03840	AT4G10150	AT4G37390	AT4G13790	AT4G36110	AT5G18050	AT5G18010	AT5G18020	AT5G18060	AT5G47370
AT5G58080-Binding-motif	28	39	20314	33602	0.0469975	AT1G52830	AT1G29460	AT1G29450	AT1G29430	AT1G29440	AT1G29490	AT1G29500	AT1G29510	AT1G04610	AT2G18010	AT3G23030	AT3G28857	AT3G03820	AT3G58190	AT3G15540	AT3G23635	AT4G38850	AT4G10150	AT4G32280	AT4G13790	AT4G38825	AT5G18030	AT5G18050	AT5G18020	AT5G18060	AT5G54490	AT5G47370	AT5G62280
General-ABI-VP1-Binding-motif-3	39	39	31168	33602	0.0531692	AT1G31580	AT1G52830	AT1G29460	AT1G29450	AT1G29430	AT1G29440	AT1G29490	AT1G29500	AT1G29510	AT1G04610	AT1G54120	AT2G23170	AT2G18010	AT2G14960	AT3G23030	AT3G28857	AT3G03840	AT3G03830	AT3G03820	AT3G58190	AT3G15540	AT3G23635	AT4G38850	AT4G10150	AT4G37390	AT4G32280	AT4G13790	AT4G36110	AT4G14819	AT4G38825	AT5G18030	AT5G18050	AT5G18010	AT5G18020	AT5G18060	AT5G18080	AT5G54490	AT5G47370	AT5G62280
AT3G51470-binding-motif	34	39	26001	33602	0.0556736	AT1G31580	AT1G52830	AT1G29450	AT1G29430	AT1G29440	AT1G29490	AT1G29500	AT1G29510	AT1G04610	AT1G54120	AT2G23170	AT2G14960	AT3G23030	AT3G28857	AT3G03840	AT3G03830	AT3G03820	AT3G58190	AT3G15540	AT3G23635	AT4G38850	AT4G37390	AT4G32280	AT4G13790	AT4G36110	AT4G14819	AT5G18030	AT5G18050	AT5G18010	AT5G18020	AT5G18060	AT5G54490	AT5G47370	AT5G62280
AT5G17300-binding-motif	14	39	8914	33602	0.0579858	AT1G52830	AT1G04610	AT3G23030	AT3G03840	AT3G03830	AT4G10150	AT4G37390	AT4G13790	AT4G36110	AT5G18050	AT5G18010	AT5G18020	AT5G18060	AT5G47370
General-MYB-binding-motif	25	39	18161	33602	0.0588958	AT1G52830	AT1G29460	AT1G29450	AT1G29430	AT1G29440	AT1G29490	AT1G29500	AT1G29510	AT1G54120	AT2G23170	AT3G23030	AT3G03840	AT3G03830	AT3G15540	AT4G10150	AT4G37390	AT4G13790	AT4G14819	AT4G38825	AT5G18030	AT5G18010	AT5G18020	AT5G18060	AT5G18080	AT5G47370
General-AUX-IAA-binding-motif-2	13	39	8132	33602	0.0589703	AT1G29460	AT1G29450	AT1G29430	AT1G29440	AT1G29510	AT3G03840	AT3G03830	AT3G03820	AT4G10150	AT4G13790	AT4G36110	AT5G18050	AT5G18020
General-AUX-IAA-binding-motif	29	39	21745	33602	0.0628108	AT1G31580	AT1G52830	AT1G29460	AT1G29450	AT1G29430	AT1G29440	AT1G29510	AT1G04610	AT1G54120	AT2G23170	AT2G18010	AT3G28857	AT3G03840	AT3G03830	AT3G03820	AT3G15540	AT3G23635	AT4G38850	AT4G37390	AT4G32280	AT4G13790	AT4G36110	AT4G14819	AT4G38825	AT5G18030	AT5G18050	AT5G18080	AT5G54490	AT5G47370
AT1G72050-binding-motif	24	39	17465	33602	0.0633018	AT1G52830	AT1G29460	AT1G29430	AT1G29440	AT1G29490	AT1G29500	AT1G29510	AT1G04610	AT2G14960	AT3G23030	AT3G28857	AT3G03830	AT3G03820	AT3G58190	AT4G37390	AT4G13790	AT4G36110	AT4G14819	AT4G38825	AT5G18060	AT5G18080	AT5G54490	AT5G47370	AT5G62280
At4g10350-binding-motif	11	39	6697	33602	0.0654582	AT1G29510	AT1G04610	AT2G23170	AT2G14960	AT3G03840	AT3G03830	AT3G03820	AT4G38850	AT5G18030	AT5G18010	AT5G18080
At5g08750-binding-motif	11	39	6881	33602	0.072787	AT1G29460	AT1G29430	AT1G29490	AT1G29500	AT1G04610	AT3G03840	AT3G03820	AT3G15540	AT4G32280	AT4G13790	AT5G18020
At5g50670-binding-motif	15	39	10261	33602	0.0749635	AT2G23170	AT2G14960	AT3G03820	AT3G58190	AT3G15540	AT3G23635	AT4G37390	AT4G32280	AT4G13790	AT4G36110	AT4G14819	AT5G18020	AT5G18060	AT5G47370	AT5G62280
At5g01380-Binding-motif	16	39	11242	33602	0.079361	AT1G29460	AT1G29450	AT1G29440	AT1G29490	AT1G29510	AT2G18010	AT3G03830	AT3G03820	AT3G15540	AT4G10150	AT4G37390	AT4G36110	AT5G18010	AT5G18020	AT5G54490	AT5G62280
AT1G25550-binding-motif	11	39	7050	33602	0.0795899	AT1G29440	AT1G29490	AT2G23170	AT2G18010	AT3G03840	AT3G03820	AT3G15540	AT4G36110	AT4G14819	AT5G18080	AT5G54490
General-RAV-binding-motif-2	3	39	1007	33602	0.0822378	AT1G52830	AT4G13790	AT5G47370
AT1G20640-binding-motif	16	39	11464	33602	0.0862702	AT1G29450	AT1G29430	AT1G29440	AT1G29490	AT1G29510	AT1G04610	AT2G18010	AT2G14960	AT3G28857	AT3G15540	AT4G38850	AT4G10150	AT4G37390	AT5G18020	AT5G18060	AT5G18080
AT5G16560-binding-motif	36	39	28561	33602	0.0886728	AT1G31580	AT1G52830	AT1G29450	AT1G29430	AT1G29440	AT1G29490	AT1G29510	AT1G04610	AT1G54120	AT2G23170	AT2G18010	AT2G14960	AT3G23030	AT3G28857	AT3G03840	AT3G03830	AT3G03820	AT3G58190	AT3G15540	AT3G23635	AT4G10150	AT4G37390	AT4G32280	AT4G13790	AT4G36110	AT4G14819	AT4G38825	AT5G18030	AT5G18050	AT5G18010	AT5G18020	AT5G18060	AT5G18080	AT5G54490	AT5G47370	AT5G62280
AT1G23380-Binding-motif	37	39	29559	33602	0.0933663	AT1G31580	AT1G52830	AT1G29460	AT1G29450	AT1G29430	AT1G29440	AT1G29490	AT1G29500	AT1G29510	AT1G04610	AT1G54120	AT2G23170	AT2G18010	AT2G14960	AT3G23030	AT3G28857	AT3G03840	AT3G03830	AT3G58190	AT3G15540	AT3G23635	AT4G38850	AT4G10150	AT4G37390	AT4G32280	AT4G13790	AT4G36110	AT4G14819	AT4G38825	AT5G18030	AT5G18050	AT5G18010	AT5G18020	AT5G18060	AT5G18080	AT5G54490	AT5G47370
At5g05790-binding-motif	20	39	15243	33602	0.0965573	AT1G31580	AT1G29460	AT1G29510	AT1G54120	AT2G18010	AT2G14960	AT3G23030	AT3G03840	AT3G03830	AT3G03820	AT3G23635	AT4G10150	AT4G37390	AT4G13790	AT4G38825	AT5G18030	AT5G18010	AT5G18020	AT5G18060	AT5G18080
At1g69490-Binding-motif	26	39	20496	33602	0.102816	AT1G31580	AT1G52830	AT1G29460	AT1G29430	AT1G29490	AT1G04610	AT1G54120	AT2G23170	AT2G18010	AT2G14960	AT3G23030	AT3G03830	AT3G58190	AT3G15540	AT4G37390	AT4G32280	AT4G13790	AT4G36110	AT4G14819	AT4G38825	AT5G18050	AT5G18060	AT5G18080	AT5G54490	AT5G47370	AT5G62280
At1g63040-Binding-motif	25	39	19820	33602	0.106755	AT1G31580	AT1G29460	AT1G29450	AT1G29430	AT1G29440	AT1G54120	AT2G23170	AT3G23030	AT3G03840	AT3G03830	AT3G03820	AT3G23635	AT4G38850	AT4G10150	AT4G37390	AT4G32280	AT4G13790	AT4G36110	AT4G14819	AT5G18030	AT5G18050	AT5G18010	AT5G18060	AT5G47370	AT5G62280
At4g01500-binding-motif	14	39	10418	33602	0.106941	AT1G29460	AT1G29450	AT1G29490	AT1G29500	AT1G29510	AT2G23170	AT3G03840	AT3G03830	AT4G13790	AT4G38825	AT5G18030	AT5G18010	AT5G18060	AT5G47370
AT2G48100-binding-motif	17	39	13267	33602	0.11174	AT1G29460	AT1G29450	AT1G29430	AT1G29440	AT1G29510	AT3G23030	AT3G28857	AT3G03840	AT3G03830	AT3G03820	AT4G38850	AT4G10150	AT4G13790	AT4G36110	AT5G18050	AT5G18020	AT5G18060
AT1G06850-binding-motif	7	39	4424	33602	0.115175	AT1G52830	AT1G29450	AT1G29490	AT3G03830	AT3G15540	AT3G23635	AT5G18080
MYB-binding-motif-2	20	39	16112	33602	0.116501	AT1G31580	AT1G52830	AT1G29450	AT1G29430	AT1G29440	AT1G29500	AT2G23170	AT2G18010	AT3G23030	AT3G28857	AT3G58190	AT3G15540	AT4G10150	AT4G37390	AT4G32280	AT4G13790	AT4G36110	AT4G14819	AT5G18030	AT5G18020
General-bHLH-binding-motif	13	39	9953	33602	0.118628	AT1G52830	AT1G29490	AT2G14960	AT3G03820	AT3G58190	AT3G15540	AT3G23635	AT4G37390	AT4G13790	AT4G38825	AT5G18010	AT5G54490	AT5G47370
AT5G03790-binding-motif	2	39	598	33602	0.12079	AT5G54490	AT5G47370
AT1G09030-binding-motif	25	39	20449	33602	0.121239	AT1G52830	AT1G29490	AT1G29510	AT1G04610	AT1G54120	AT2G18010	AT3G28857	AT3G03840	AT3G03830	AT3G58190	AT3G15540	AT3G23635	AT4G10150	AT4G37390	AT4G13790	AT4G14819	AT4G38825	AT5G18030	AT5G18050	AT5G18010	AT5G18020	AT5G18060	AT5G18080	AT5G54490	AT5G62280
At3g26790-Binding-motif	4	39	2009	33602	0.121507	AT2G18010	AT2G14960	AT4G13790	AT4G38825
At1g74650-binding-motif	38	39	30846	33602	0.123691	AT1G31580	AT1G52830	AT1G29460	AT1G29450	AT1G29430	AT1G29440	AT1G29490	AT1G29500	AT1G29510	AT1G04610	AT1G54120	AT2G23170	AT2G18010	AT2G14960	AT3G23030	AT3G28857	AT3G03840	AT3G03830	AT3G03820	AT3G58190	AT3G15540	AT3G23635	AT4G38850	AT4G10150	AT4G37390	AT4G32280	AT4G13790	AT4G36110	AT4G14819	AT4G38825	AT5G18050	AT5G18010	AT5G18020	AT5G18060	AT5G18080	AT5G54490	AT5G47370	AT5G62280
AT4G31920-Binding-motif	23	39	19075	33602	0.124154	AT1G52830	AT1G29460	AT1G29450	AT1G29430	AT1G29440	AT1G29490	AT1G29500	AT1G29510	AT1G04610	AT3G03840	AT3G03830	AT3G03820	AT3G15540	AT3G23635	AT4G38850	AT4G13790	AT4G38825	AT5G18030	AT5G18050	AT5G18010	AT5G18080	AT5G54490	AT5G47370
General-bZIP-binding-motif	11	39	8358	33602	0.12584	AT1G52830	AT1G54120	AT2G23170	AT2G18010	AT2G14960	AT3G03830	AT3G15540	AT4G37390	AT4G13790	AT4G14819	AT5G47370
AT4G24020-binding-motif	14	39	11277	33602	0.12619	AT1G31580	AT1G29490	AT1G29500	AT1G04610	AT2G23170	AT3G23030	AT3G28857	AT4G13790	AT4G36110	AT4G14819	AT5G18010	AT5G18060	AT5G18080	AT5G62280
General-ABI-VP1-Binding-motif-2	14	39	11762	33602	0.1314	AT1G31580	AT1G29430	AT1G29490	AT1G29510	AT2G18010	AT3G58190	AT3G23635	AT4G10150	AT4G32280	AT4G14819	AT5G18030	AT5G18060	AT5G54490	AT5G47370
AT5G67450-binding-motif	33	39	26862	33602	0.1315	AT1G31580	AT1G29450	AT1G29430	AT1G29440	AT1G29490	AT1G29500	AT1G29510	AT1G04610	AT1G54120	AT2G18010	AT2G14960	AT3G28857	AT3G03840	AT3G03830	AT3G03820	AT3G58190	AT3G15540	AT3G23635	AT4G38850	AT4G10150	AT4G32280	AT4G13790	AT4G36110	AT4G14819	AT4G38825	AT5G18030	AT5G18050	AT5G18010	AT5G18020	AT5G18060	AT5G54490	AT5G47370	AT5G62280
At1g68320-binding-motif	13	39	10989	33602	0.134112	AT1G52830	AT1G29440	AT1G29500	AT1G29510	AT2G14960	AT3G03820	AT3G15540	AT3G23635	AT4G10150	AT4G37390	AT5G18030	AT5G18010	AT5G62280
At2g31460-Binding-motif	4	39	2173	33602	0.138633	AT3G28857	AT4G38850	AT4G14819	AT5G18030
General-ARID-Binding-motif	28	39	23693	33602	0.138668	AT1G29460	AT1G29450	AT1G29430	AT1G29440	AT1G29490	AT1G29500	AT1G29510	AT1G04610	AT1G54120	AT2G23170	AT2G18010	AT2G14960	AT3G23030	AT3G28857	AT3G58190	AT3G15540	AT4G38850	AT4G10150	AT4G32280	AT4G13790	AT4G36110	AT4G14819	AT4G38825	AT5G18030	AT5G18010	AT5G18020	AT5G18080	AT5G62280
At5g61620-binding-motif	10	39	8327	33602	0.143955	AT1G29500	AT2G18010	AT3G03820	AT3G23635	AT4G14819	AT5G18030	AT5G18050	AT5G18020	AT5G18060	AT5G54490
AT1G69180-binding-motif	2	39	722	33602	0.153217	AT2G14960	AT4G14819
AT2G03500-binding-motif	6	39	4311	33602	0.156769	AT1G31580	AT2G18010	AT3G23030	AT3G28857	AT4G38850	AT5G54490
General-Homeobox-binding-motif	35	39	28847	33602	0.15816	AT1G31580	AT1G52830	AT1G29460	AT1G29450	AT1G29430	AT1G29510	AT1G04610	AT1G54120	AT2G23170	AT2G18010	AT2G14960	AT3G23030	AT3G28857	AT3G03840	AT3G03830	AT3G03820	AT3G58190	AT3G15540	AT3G23635	AT4G38850	AT4G10150	AT4G37390	AT4G32280	AT4G36110	AT4G14819	AT4G38825	AT5G18030	AT5G18050	AT5G18010	AT5G18020	AT5G18060	AT5G18080	AT5G54490	AT5G47370	AT5G62280
At5g56840-binding-motif	7	39	5557	33602	0.16005	AT2G18010	AT3G23635	AT5G18030	AT5G18050	AT5G18020	AT5G54490	AT5G47370
AT2G24765-Binding-motif	2	39	771	33602	0.16535	AT3G23030	AT5G18080
General-R1R2R3-binding-motif	3	39	1641	33602	0.175606	AT1G52830	AT4G13790	AT5G47370
AT3G20770-binding-motif	5	39	3846	33602	0.181485	AT1G31580	AT1G52830	AT1G29450	AT4G13790	AT5G47370
At1g13450-Binding-motif	4	39	2705	33602	0.183186	AT3G03840	AT3G15540	AT5G18010	AT5G18060
General-C2H2-binding-motif	4	39	2939	33602	0.195648	AT1G29430	AT1G04610	AT4G13790	AT4G36110
AT2G42430-binding-motif	3	39	1880	33602	0.201545	AT1G29460	AT1G29500	AT4G38825
E2F-DP-binding-motif	4	39	3137	33602	0.202426	AT1G31580	AT1G54120	AT3G23030	AT5G18020
AT1G27730-binding-motif	35	39	29935	33602	0.204481	AT1G31580	AT1G52830	AT1G29460	AT1G29450	AT1G29430	AT1G29440	AT1G29490	AT1G29500	AT1G29510	AT1G04610	AT1G54120	AT2G23170	AT2G18010	AT2G14960	AT3G28857	AT3G03840	AT3G03820	AT3G58190	AT3G15540	AT3G23635	AT4G38850	AT4G10150	AT4G37390	AT4G32280	AT4G13790	AT4G36110	AT4G14819	AT4G38825	AT5G18030	AT5G18050	AT5G18010	AT5G18020	AT5G18080	AT5G47370	AT5G62280
General-SRS-binding-motif	2	39	964	33602	0.207859	AT5G18030	AT5G62280
AT4G11080-binding-motif	2	39	1228	33602	0.249764	AT3G58190	AT4G36110
At2g27300-binding-motif	2	39	1286	33602	0.256331	AT4G38850	AT5G18020
AT4G00270-Binding-motif	1	39	348	33602	0.272187	AT3G23030
At3g55370-binding-motif	38	39	31906	33602	0.275048	AT1G31580	AT1G29460	AT1G29450	AT1G29430	AT1G29440	AT1G29490	AT1G29500	AT1G29510	AT1G04610	AT1G54120	AT2G23170	AT2G18010	AT2G14960	AT3G23030	AT3G28857	AT3G03840	AT3G03830	AT3G03820	AT3G58190	AT3G15540	AT3G23635	AT4G38850	AT4G10150	AT4G37390	AT4G32280	AT4G13790	AT4G36110	AT4G14819	AT4G38825	AT5G18030	AT5G18050	AT5G18010	AT5G18020	AT5G18060	AT5G18080	AT5G54490	AT5G47370	AT5G62280
At2g42280-binding-motif	2	39	1627	33602	0.277082	AT4G38850	AT4G37390
At3g50060-binding-motif	1	39	378	33602	0.285678	AT1G29440
General-TCP-binding-motif	1	39	438	33602	0.309038	AT4G37390
AT5G11260-binding-motif	1	39	457	33602	0.315494	AT4G37390
At1g63030-Binding-motif	1	39	463	33602	0.317444	AT2G23170
General-ABI-VP1-Binding-motif-1	39	39	32682	33602	0.338475	AT1G31580	AT1G52830	AT1G29460	AT1G29450	AT1G29430	AT1G29440	AT1G29490	AT1G29500	AT1G29510	AT1G04610	AT1G54120	AT2G23170	AT2G18010	AT2G14960	AT3G23030	AT3G28857	AT3G03840	AT3G03830	AT3G03820	AT3G58190	AT3G15540	AT3G23635	AT4G38850	AT4G10150	AT4G37390	AT4G32280	AT4G13790	AT4G36110	AT4G14819	AT4G38825	AT5G18030	AT5G18050	AT5G18010	AT5G18020	AT5G18060	AT5G18080	AT5G54490	AT5G47370	AT5G62280
AT1G47870-binding-motif	1	39	629	33602	0.356299	AT2G18010
At2g26960-binding-motif	38	39	32486	33602	0.359025	AT1G31580	AT1G52830	AT1G29460	AT1G29450	AT1G29430	AT1G29440	AT1G29490	AT1G29500	AT1G29510	AT1G04610	AT1G54120	AT2G23170	AT2G18010	AT2G14960	AT3G23030	AT3G28857	AT3G03840	AT3G03830	AT3G03820	AT3G58190	AT3G15540	AT3G23635	AT4G38850	AT4G10150	AT4G37390	AT4G32280	AT4G13790	AT4G36110	AT4G14819	AT5G18030	AT5G18050	AT5G18010	AT5G18020	AT5G18060	AT5G18080	AT5G54490	AT5G47370	AT5G62280
At1g35460-binding-motif	1	39	650	33602	0.359383	AT4G37390
AT1G43700-binding-motif	1	39	715	33602	0.36673	AT3G23635
At4g24470-binding-motif	1	39	736	33602	0.368443	AT3G15540
At3g21175-binding-motif	1	39	808	33602	0.372126	AT5G47370
At4g28140-Binding-motif	1	39	835	33602	0.372705	AT4G37390
AT4G18020-Binding-motif	39	39	33196	33602	0.622282	AT1G31580	AT1G52830	AT1G29460	AT1G29450	AT1G29430	AT1G29440	AT1G29490	AT1G29500	AT1G29510	AT1G04610	AT1G54120	AT2G23170	AT2G18010	AT2G14960	AT3G23030	AT3G28857	AT3G03840	AT3G03830	AT3G03820	AT3G58190	AT3G15540	AT3G23635	AT4G38850	AT4G10150	AT4G37390	AT4G32280	AT4G13790	AT4G36110	AT4G14819	AT4G38825	AT5G18030	AT5G18050	AT5G18010	AT5G18020	AT5G18060	AT5G18080	AT5G54490	AT5G47370	AT5G62280
General-YABBY-binding-motif	39	39	33216	33602	0.637081	AT1G31580	AT1G52830	AT1G29460	AT1G29450	AT1G29430	AT1G29440	AT1G29490	AT1G29500	AT1G29510	AT1G04610	AT1G54120	AT2G23170	AT2G18010	AT2G14960	AT3G23030	AT3G28857	AT3G03840	AT3G03830	AT3G03820	AT3G58190	AT3G15540	AT3G23635	AT4G38850	AT4G10150	AT4G37390	AT4G32280	AT4G13790	AT4G36110	AT4G14819	AT4G38825	AT5G18030	AT5G18050	AT5G18010	AT5G18020	AT5G18060	AT5G18080	AT5G54490	AT5G47370	AT5G62280
AT3G19510-binding-motif	39	39	33221	33602	0.640834	AT1G31580	AT1G52830	AT1G29460	AT1G29450	AT1G29430	AT1G29440	AT1G29490	AT1G29500	AT1G29510	AT1G04610	AT1G54120	AT2G23170	AT2G18010	AT2G14960	AT3G23030	AT3G28857	AT3G03840	AT3G03830	AT3G03820	AT3G58190	AT3G15540	AT3G23635	AT4G38850	AT4G10150	AT4G37390	AT4G32280	AT4G13790	AT4G36110	AT4G14819	AT4G38825	AT5G18030	AT5G18050	AT5G18010	AT5G18020	AT5G18060	AT5G18080	AT5G54490	AT5G47370	AT5G62280
General-MADS-box-binding-motif	39	39	33544	33602	0.934808	AT1G31580	AT1G52830	AT1G29460	AT1G29450	AT1G29430	AT1G29440	AT1G29490	AT1G29500	AT1G29510	AT1G04610	AT1G54120	AT2G23170	AT2G18010	AT2G14960	AT3G23030	AT3G28857	AT3G03840	AT3G03830	AT3G03820	AT3G58190	AT3G15540	AT3G23635	AT4G38850	AT4G10150	AT4G37390	AT4G32280	AT4G13790	AT4G36110	AT4G14819	AT4G38825	AT5G18030	AT5G18050	AT5G18010	AT5G18020	AT5G18060	AT5G18080	AT5G54490	AT5G47370	AT5G62280
General-ARR-GARP-binding-motif	39	39	33600	33602	0.99768	AT1G31580	AT1G52830	AT1G29460	AT1G29450	AT1G29430	AT1G29440	AT1G29490	AT1G29500	AT1G29510	AT1G04610	AT1G54120	AT2G23170	AT2G18010	AT2G14960	AT3G23030	AT3G28857	AT3G03840	AT3G03830	AT3G03820	AT3G58190	AT3G15540	AT3G23635	AT4G38850	AT4G10150	AT4G37390	AT4G32280	AT4G13790	AT4G36110	AT4G14819	AT4G38825	AT5G18030	AT5G18050	AT5G18010	AT5G18020	AT5G18060	AT5G18080	AT5G54490	AT5G47370	AT5G62280
AT1G23420-binding-motif	39	39	33601	33602	0.998839	AT1G31580	AT1G52830	AT1G29460	AT1G29450	AT1G29430	AT1G29440	AT1G29490	AT1G29500	AT1G29510	AT1G04610	AT1G54120	AT2G23170	AT2G18010	AT2G14960	AT3G23030	AT3G28857	AT3G03840	AT3G03830	AT3G03820	AT3G58190	AT3G15540	AT3G23635	AT4G38850	AT4G10150	AT4G37390	AT4G32280	AT4G13790	AT4G36110	AT4G14819	AT4G38825	AT5G18030	AT5G18050	AT5G18010	AT5G18020	AT5G18060	AT5G18080	AT5G54490	AT5G47370	AT5G62280
General-EIL-binding-motif	39	39	33601	33602	0.998839	AT1G31580	AT1G52830	AT1G29460	AT1G29450	AT1G29430	AT1G29440	AT1G29490	AT1G29500	AT1G29510	AT1G04610	AT1G54120	AT2G23170	AT2G18010	AT2G14960	AT3G23030	AT3G28857	AT3G03840	AT3G03830	AT3G03820	AT3G58190	AT3G15540	AT3G23635	AT4G38850	AT4G10150	AT4G37390	AT4G32280	AT4G13790	AT4G36110	AT4G14819	AT4G38825	AT5G18030	AT5G18050	AT5G18010	AT5G18020	AT5G18060	AT5G18080	AT5G54490	AT5G47370	AT5G62280

## Sheet: Heat map input
UNIQID	name	GENE ALIAS	IAA/mock	light/dark
AT4G37390	AT4G37390	GH3.2	4.70297	-2.84539
AT2G14960	AT2G14960	GH3.1	3.66132	-1.62134
AT2G23170	AT2G23170	GH3.3	3.2251	-3.6005
AT3G58190	AT3G58190	LBD29	2.62305	-1.5717
AT3G23635	AT3G23635	RTFL13	2.37637	-3.12466
AT2G18010	AT2G18010	SAUR10	2.2323	-1.80201
AT4G38850	AT4G38850	SAUR15	2.23202	-1.80502
AT1G29490	AT1G29490	SAUR68	2.13575	-2.51969
AT5G54490	AT5G54490	PBP1	2.0566	-1.51606
AT5G47370	AT5G47370	HAT2	1.97326	-1.82464
AT4G13790	AT4G13790	SAUR25	1.95547	-3.3996
AT3G03830	AT3G03830	SAUR28	1.93162	-1.93658
AT1G29460	AT1G29460	SAUR65	1.92324	-2.38088
AT5G18060	AT5G18060	SAUR23	1.8188	-2.97462
AT5G18050	AT5G18050	SAUR22	1.76061	-3.07121
AT1G29430	AT1G29430	SAUR62	1.75606	-1.38701
AT5G18030	AT5G18030	NA	1.7376	-2.55447
AT5G18080	AT5G18080	SAUR24	1.71989	-2.71916
AT4G10150	AT4G10150	NA	1.70076	-2.64546
AT3G03820	AT3G03820	SAUR29	1.685	-1.22276
AT1G52830	AT1G52830	IAA6, SHY1	1.68483	-2.95631
AT5G18010	AT5G18010	SAUR19	1.61193	-2.62795
AT3G03840	AT3G03840	SAUR27	1.60584	-1.3418
AT1G29500	AT1G29500	SAUR66	1.60191	-1.80051
AT1G04610	AT1G04610	YUC3	1.49514	-1.96937
AT4G38825	AT4G38825	SAUR13	1.46232	-3.10756
AT3G23030	AT3G23030	IAA2	1.43983	-1.3734
AT1G29440	AT1G29440	SAUR63	1.4062	-1.39627
AT1G29450	AT1G29450	SAUR64	1.35116	-1.78074
AT4G36110	AT4G36110	SAUR9	1.32261	-2.11829
AT3G28857	AT3G28857	PRE5	1.26332	-2.83767
AT4G14819	AT4G14819	NA	1.26062	-1.08322
AT4G32280	AT4G32280	IAA29	1.23426	-2.23894
AT1G54120	AT1G54120	NA	1.18358	-1.51015
AT5G18020	AT5G18020	SAUR20	1.15934	-1.86533
AT1G29510	AT1G29510	SAUR67	1.14964	-1.56536
AT5G62280	AT5G62280	NA	1.07463	-1.72554
AT3G15540	AT3G15540	IAA19	1.06916	-2.89253
AT1G31580	AT1G31580	ECS1	-1.19776	4.38306
