# Supplementary material for: FRUITFULL Is a Repressor of Apical Hook Opening in Arabidopsis thaliana
Source: Int J Mol Sci. 2020 Sep 3;21(17):6438. doi: 10.3390/ijms21176438 (PMC7504503; doi:10.3390/ijms21176438)
Supplement: Supplementary file 1 [file ijms-21-06438-s001.zip › supplemental files/SUP file 3_expression in accessions.xlsx]

## Sheet: candidates 
TF Atg code	At1g01030			AT5G60910			At1g51140			AT1G19850			At3g30210			At1g74370			AT3G24120			AT5G65310
TF name	NGA3			AGL8			AKS1			ARF5/MP			MYB121						PHL2			HB5
Putative target genes	AT1G31580	ECS1		AT1G31580	ECS1		AT1G52830	IAA6, SHY1		AT1G31580	ECS1		AT1G52830	IAA6, SHY1		AT1G29440	SAUR63		AT1G29440	SAUR63		AT1G04610	YUC3
	AT1G29450	SAUR64		AT1G29430	SAUR62		AT1G29430	SAUR62		AT1G52830	IAA6, SHY1		AT1G29460	SAUR65		AT1G29460	SAUR65		AT1G29460	SAUR65		AT1G29460	SAUR65
	AT1G29430	SAUR62		AT1G29490	SAUR68		AT1G29440	SAUR63		AT3G03830	SAUR28		AT1G29440	SAUR63		AT1G29490	SAUR68		AT1G29490	SAUR68		AT1G29500	SAUR66
	AT1G29440	SAUR63		AT2G18010	SAUR10		AT1G29510	SAUR67		AT3G03820	SAUR29		AT1G29500	SAUR66		AT1G29500	SAUR66		AT1G29500	SAUR66		AT1G31580	ECS1
	AT1G29490	SAUR68		AT3G23030	IAA2		AT4G38850	SAUR15		AT3G15540	IAA19		AT1G29510	SAUR67		AT1G29510	SAUR67		AT1G29510	SAUR67		AT2G14960	GH3.1
	AT1G29500	SAUR66		AT3G03840	SAUR27		AT4G13790	SAUR25		AT3G23635	RTFL13		AT2G18010	SAUR10		AT3G03820	SAUR29		AT2G23170	GH3.3		AT2G18010	SAUR10
	AT1G29510	SAUR67		AT4G38850	SAUR15		AT4G38825	SAUR13		AT4G13790	SAUR25		AT4G36110	SAUR9		AT3G03830	SAUR28		AT3G03820	SAUR29		AT2G23170	GH3.3
	AT1G54120	NA		AT4G32280	IAA29		AT5G18080	SAUR24					AT4G14819	NA		AT3G15540	IAA19		AT3G03830	SAUR28		AT3G03820	SAUR29
	AT2G18010	SAUR10		AT5G18030	SAUR21		AT5G62280	NA					AT5G18010	SAUR19		AT3G23030	IAA2		AT3G15540	IAA19		AT3G03840	SAUR27
	AT3G28857	PRE5		AT5G18050	SAUR22								AT5G18080	SAUR24		AT3G23635	RTFL13		AT3G23030	IAA2		AT3G23030	IAA2
	AT3G03830	SAUR28		AT5G18010	SAUR19											AT3G28857	PRE5		AT3G23635	RTFL13		AT3G23635	RTFL13
	AT4G36110	SAUR9		AT5G18020	SAUR20											AT4G13790	SAUR25		AT4G10150	NA		AT3G28857	PRE5
	AT4G38825	SAUR13		AT5G18060	SAUR23											AT4G14819	NA		AT4G32280	IAA29		AT3G58190	LBD29
	AT5G18030	SAUR21		AT5G18080	SAUR24											AT4G32280	IAA29		AT4G37390	GH3.2		AT4G10150	NA
	AT5G18050	SAUR22		AT5G47370	HAT2											AT4G36110	SAUR9		AT5G18010	SAUR19		AT4G14819	NA
	AT5G18010	SAUR19		AT5G62280	NA											AT4G38825	SAUR13		AT5G54490	PBP1		AT4G32280	IAA29
	AT5G18080	SAUR24														AT4G38850	SAUR15					AT5G18060	SAUR23
	AT5G47370	HAT2														AT5G18050	SAUR22					AT5G47370	HAT2
																AT5G18060	SAUR23					AT5G54490	PBP1
																AT5G47370	HAT2					AT5G62280	NA
																AT5G62280	NA

## Sheet: At1g01030
accession ID	AT1G01030		AT1G31580	AT1G29450	AT1G29430	AT1G29440	AT1G29490	AT1G29500	AT1G29510	AT1G54120	AT2G18010	AT3G28857	AT3G03830	AT4G36110	AT4G38825	AT5G18030	AT5G18050	AT5G18010	AT5G18080	AT5G47370
108	41		43	64	458	105	0	39	44	42	0	7	11	85	NOT FOUND	99	14	138	20	759
139	87		9	736	915	660	114	259	286	149	65	34	307	81		1342	291	788	562	4062
159	224		2649	80	333	330	60	67	166	266	15	32	55	90		285	332	0	193	1487
265	132		9	223	423	250	17	80	208	124	44	105	48	99		391	207	32	499	2691
350	106		1978	291	850	1108	52	553	690	147	74	38	127	48		939	330	99	587	3419
351	114		9	366	685	602	5	440	357	139	38	17	76	64		641	324	36	533	3205
403	113		30	298	757	426	30	209	471	181	66	58	83	44		414	54	63	271	1722
410	122		93	191	203	150	48	122	146	134	63	13	35	76		152	129	11	187	2445
424	137		258	102	177	146	13	121	80	77	23	12	25	64		69	67	6	132	1914
428	126		7170	129	204	51	10	147	143	113	32	54	11	56		123	126	69	97	3174
506	143		15	352	681	160	33	450	573	138	25	23	27	69		421	77	96	509	3092
630	123		3	461	900	169	82	502	576	137	72	21	227	212		723	151	115	662	5907
687	139		14	511	794	218	39	563	626	151	35	38	44	96		650	108	123	731	2310
728	128		26	784	1273	361	172	847	1066	186	78	59	50	203		966	199	231	949	6217
763	156		131	60	417	196	8	241	151	132	3	13	13	49		63	0	12	53	1336
768	69		1478	63	137	91	28	173	203	74	17	61	14	84		187	229	52	169	1445
801	75		47	169	254	174	0	1	51	101	23	19	11	52		236	195	0	162	796
870	118		159	322	621	132	87	416	492	155	63	38	29	149		515	142	80	430	2847
915	88		14766	131	541	808	31	373	425	131	36	24	50	38		434	208	65	333	2451
932	129		73	47	84	45	5	28	49	166	42	41	4	138		102	50	8	167	2602
997	31		281	160	200	182	23	50	150	88	6	35	27	97		210	304	9	303	916
1002	44		8457	242	499	437	13	85	74	115	15	23	45	139		276	278	45	273	543
1066	51		9806	276	664	319	15	126	241	127	26	17	81	102		336	254	34	370	1477
1158	35		13920	210	223	160	40	72	128	15	14	5	46	130		139	113	30	166	1391
1317	54		7983	423	796	467	18	202	424	87	21	24	62	95		582	82	65	589	569
1435	251		13	56	123	100	13	82	115	44	8	1	14	5		107	65	52	84	973
1684	106		23	324	669	175	17	709	864	151	17	31	20	33		633	95	142	606	3267
1741	149		10	205	529	117	11	376	521	112	9	18	22	32		384	39	90	387	2011
1829	94		414	316	654	153	14	370	523	128	24	14	18	64		491	263	0	299	2760
1872	78		103	229	519	255	4	383	518	129	17	2	30	34		209	158	112	163	3328
1890	154		27328	75	291	132	7	161	186	145	5	10	33	27		117	23	44	73	874
1925	57		145	111	537	312	1	312	448	106	11	7	36	49		323	131	141	181	2091
1954	76		1454	148	386	80	7	251	468	137	9	6	21	38		222	149	96	123	2162
2016	64		175	94	338	161	2	278	339	140	2	2	29	24		160	37	74	83	1336
2017	88		32	269	578	140	25	494	697	163	17	29	11	46		415	73	80	406	3024
2031	107		8	162	332	84	38	342	577	87	3	6	3	19		164	37	38	183	3093
2171	88		46	387	585	565	24	327	325	159	20	6	60	45		331	140	59	258	2813
2202	78		6942	132	452	347	4	351	361	86	8	7	43	53		348	126	139	189	1831
2212	103		52	405	773	166	24	413	577	114	37	43	25	65		516	128	107	460	3519
2276	153		50	371	800	156	20	403	521	105	37	16	88	60		458	185	59	392	4056
2278	71		87	168	516	113	15	353	520	106	6	8	5	24		143	13	29	159	2230
2317	165		256	393	510	508	29	358	289	147	21	51	66	53		240	231	43	334	2780
2370	131		19	405	848	202	25	589	651	134	67	49	51	85		761	161	116	519	2832
4779	124		1420	210	377	91	1	392	352	135	27	42	96	48		403	231	40	366	1496
4807	83		5	507	608	430	84	207	435	204	81	52	200	60		920	215	154	678	3549
4826	145		4424	287	472	274	28	153	308	150	33	47	108	65		716	227	76	560	2780
4884	95		3206	270	329	345	42	213	183	141	26	77	56	42		208	60	37	220	3671
4931	138		203	271	398	186	1	247	284	68	8	11	38	21		123	26	23	67	1752
4939	107		186	413	569	314	1	444	521	134	10	20	49	42		444	59	72	458	2498
4958	97		4574	238	532	114	24	296	351	110	32	31	85	68		255	144	54	309	1994
5023	108		1336	489	535	274	4	399	412	113	12	13	25	51		369	41	69	495	2225
5104	203		4674	363	565	475	22	343	337	84	25	17	85	42		259	137	14	384	3324
5151	119		65	282	571	358	29	326	346	107	63	17	86	101		486	261	64	580	3102
5210	95		2	70	283	56	4	189	262	107	3	3	8	30		112	7	14	123	1432
5236	160		62	257	330	177	0	253	254	218	1	11	49	42		128	14	25	155	1859
5276	122		52	49	96	140	1	84	140	41	2	4	11	60		52	4	24	49	815
5279	111		1876	580	562	350	0	400	450	66	25	20	92	36		414	66	86	381	3352
5349	58		12	85	362	425	30	320	441	174	52	11	51	78		262	185	22	321	3755
5353	109		8918	98	144	103	0	182	137	69	11	33	4	112		125	38	12	197	770
5395	139		8729	112	419	43	2	45	214	73	6	7	15	41		132	66	33	116	920
5486	92		10259	362	546	597	23	363	324	108	40	41	72	56		310	232	12	363	3006
5535	113		86	417	495	153	19	635	528	157	109	84	196	131		895	270	136	874	3816
5577	104		178	104	185	34	2	154	185	75	6	19	24	38		180	44	34	222	966
5644	108		69	107	567	699	45	399	391	73	29	30	51	55		489	196	66	356	1904
5717	94		26	299	403	454	0	206	287	119	2	20	30	31		424	126	94	287	1388
5718	115		25	483	703	970	43	546	430	64	42	27	237	6		792	324	120	448	2748
5720	94		7435	173	139	141	2	250	196	85	15	20	130	55		175	132	28	289	1805
5726	95		49	221	267	95	0	323	270	84	10	11	47	23		304	46	42	289	1608
5741	108		93	307	769	1258	58	794	807	234	93	44	169	117		1859	1154	220	932	2749
5748	106		3518	142	104	108	10	192	146	74	13	30	41	28		142	164	87	162	1657
5768	151		240	123	315	62	0	309	238	134	14	22	7	11		287	140	32	197	1108
5772	73		11	389	547	551	73	560	401	236	118	107	199	77		1061	924	62	759	3580
5778	119		11910	593	792	932	99	590	509	132	92	35	193	118		816	525	237	381	4658
5779	113		5620	478	838	497	74	226	667	159	125	89	142	102		769	144	126	563	4454
5784	123		1020	427	663	525	187	531	479	121	23	54	86	64		757	202	129	721	2783
5798	132		1192	494	526	321	5	467	426	149	41	63	115	51		600	77	120	518	3229
5800	145		1158	417	626	452	65	217	513	146	92	60	173	105		897	147	144	668	4642
5811	132		3193	279	311	275	69	385	329	164	68	101	103	64		559	400	86	438	2996
5818	115		18984	192	198	207	15	241	190	45	5	12	46	99		132	201	42	138	1262
5822	115		16884	39	61	38	28	69	59	185	86	35	56	150		87	109	2	110	2560
5831	51		2354	176	406	96	28	391	281	147	16	19	24	82		158	249	30	156	1619
5837	93		67	382	578	414	27	163	336	236	38	37	85	104		647	573	251	433	2063
5860	45		374	112	374	115	12	38	103	81	6	8	21	54		145	17	45	159	1132
5874	223		2049	62	74	17	14	26	50	110	43	32	14	65		61	12	14	79	2634
5890	151		8	34	85	17	44	77	64	131	49	25	14	91		79	76	28	91	3620
5893	122		266	63	169	128	6	217	78	109	16	28	21	37		165	119	41	94	893
5907	157		15	238	270	332	15	324	179	123	52	29	76	77		411	216	46	383	1354
5921	107		3037	117	289	185	5	222	120	101	21	23	17	64		215	153	68	107	814
5950	106		2426	132	211	198	3	236	229	198	15	24	30	55		230	143	26	204	1020
5984	166		62	212	319	394	11	401	173	140	48	21	44	143		597	303	119	349	1222
5993	154		459	172	276	204	5	309	188	113	17	60	28	53		232	45	21	137	1437
6008	175		588	109	234	33	25	92	137	88	16	27	23	37		252	116	58	145	1196
6009	40		6230	294	457	100	12	350	305	82	26	5	189	130		367	309	29	370	911
6017	89		4262	220	415	317	7	273	315	72	16	20	211	106		335	41	31	318	1117
6020	101		207	106	194	99	4	35	184	199	32	19	43	163		160	123	22	187	987
6024	92		784	188	237	128	4	40	127	84	14	4	28	107		213	197	40	222	855
6025	44		5552	145	246	44	3	167	132	29	26	19	26	146		173	91	19	186	736
6038	98		331	67	95	66	4	67	80	28	9	4	6	58		120	81	9	164	707
6041	87		55	160	350	159	11	41	202	85	10	9	37	20		214	38	41	227	1290
6064	166		21	204	207	222	22	84	241	287	89	47	217	111		525	548	149	369	1025
6086	77		463	260	319	251	14	39	170	84	17	15	55	186		408	378	77	507	2491
6097	109		9269	87	206	32	12	240	240	78	8	19	32	74		169	78	9	159	546
6099	39		55	150	257	154	1	0	27	152	23	11	42	11		309	26	30	219	1984
6106	59		3706	121	275	257	6	214	246	82	9	16	21	77		258	207	43	247	888
6107	18		3566	122	247	141	14	26	80	80	18	10	52	72		152	82	32	159	858
6108	114		5223	294	322	68	7	363	315	192	9	19	27	37		360	322	63	457	1196
6111	30		3652	223	329	244	32	96	234	117	11	18	43	11		442	43	60	446	904
6133	40		27715	171	275	142	5	57	129	31	12	8	21	32		169	73	25	229	605
6137	54		115	215	537	151	23	121	224	28	6	3	33	53		183	136	22	246	1294
6138	39		120	86	210	118	4	144	177	178	6	17	9	46		105	18	16	112	657
6140	35		5493	172	151	142	22	279	266	128	14	18	32	22		160	111	19	199	1053
6145	61		13704	167	192	161	11	260	282	47	24	27	30	83		263	25	26	229	1255
6148	73		20615	141	239	146	12	47	233	168	51	22	51	78		246	138	27	224	1119
6154	50		3585	196	399	71	12	209	270	88	34	17	29	54		301	217	50	307	1462
6163	123		4766	209	346	77	5	216	194	77	30	9	26	44		299	133	38	244	1547
6166	73		12553	80	151	46	1	147	101	194	14	22	15	82		145	25	8	143	942
6169	202		3132	167	599	320	12	257	301	84	16	12	148	18		293	11	40	253	1336
6171	93		10442	87	541	252	0	375	198	155	7	22	124	25		132	3	12	121	1001
6174	62		7304	55	268	123	1	122	190	214	6	5	107	50		81	9	11	97	780
6177	125		8964	69	352	206	0	184	226	138	15	18	19	41		180	42	14	195	651
6194	164		172	86	283	258	3	232	104	99	32	75	35	45		126	88	19	157	1397
6195	104		2490	211	357	183	6	290	146	280	21	59	27	49		289	29	49	237	3002
6198	117		769	69	141	122	6	108	112	71	15	12	29	120		112	21	12	77	568
6201	157		322	85	339	74	1	153	118	205	15	11	18	23		112	27	25	80	455
6203	132		141	86	147	133	2	104	92	84	20	19	13	111		136	64	42	99	961
6217	179		5454	37	100	55	2	46	54	156	16	33	41	47		117	8	17	141	1172
6218	224		4539	104	176	32	1	167	103	114	11	34	61	60		147	12	15	123	979
6220	75		154	147	211	167	15	207	188	141	44	40	33	89		260	318	31	344	2698
6240	90		5767	40	116	75	2	97	92	97	8	34	20	48		120	60	24	115	568
6241	129		3050	86	171	127	0	219	174	123	34	26	32	68		207	152	67	225	1265
6255	105		1258	204	235	229	16	62	221	120	128	17	29	143		569	575	30	518	1487
6268	31		10633	297	767	568	0	365	244	206	34	21	18	53		470	358	27	440	1477
6284	120		2178	188	361	95	26	176	295	164	52	18	70	109		367	71	67	414	1464
6296	114		3	180	319	292	40	362	183	156	50	22	110	63		327	73	88	448	1758
6390	78		5070	150	220	38	8	236	175	66	56	13	44	58		337	245	60	311	1281
6424	118		23	94	115	51	6	35	126	32	27	3	41	47		152	61	22	126	1819
6434	129		3095	99	138	220	1	220	96	67	40	17	53	59		263	177	25	297	1853
6445	100		13843	128	287	189	4	226	133	65	5	50	14	26		188	18	13	105	830
6680	39		35	183	312	310	24	306	209	104	69	35	121	124		408	383	278	362	2083
6709	98		1	54	197	74	2	43	243	103	1	5	8	31		104	26	0	74	1094
6744	76		100	185	443	215	1	1	40	125	33	34	40	52		482	294	0	361	1259
6830	184		1182	249	546	429	17	559	437	282	44	69	57	45		480	287	134	244	3206
6900	81		3494	295	586	367	14	353	396	41	45	11	41	43		380	314	49	371	1230
6906	91		22	87	217	39	4	159	130	123	5	36	18	27		177	87	31	85	1152
6907	74		8592	203	401	205	5	320	255	87	7	22	30	32		382	285	29	350	1147
6908	186		22	342	519	310	31	155	403	124	75	34	134	78		620	178	6	421	3798
6909	190		6047	131	246	80	31	227	119	28	5	1	2	44		94	193	20	157	3214
6911	97		5134	42	89	15	7	91	78	73	11	20	21	116		67	10	16	89	1058
6917	163		4735	162	406	208	16	182	248	51	20	12	167	32		336	29	31	305	1610
6923	114		14	443	831	169	33	468	584	137	66	62	146	87		622	98	125	621	4891
6933	52		296	26	66	46	2	87	51	203	34	42	59	65		55	51	8	115	2429
6937	240		19	70	131	116	23	216	136	194	24	26	39	126		110	47	11	140	1256
6939	67		1259	178	328	306	6	286	247	80	18	31	58	29		284	90	38	193	1930
6943	97		1726	287	603	131	9	410	434	132	30	39	61	80		314	374	43	312	2524
6944	122		437	536	537	682	41	532	398	118	72	67	134	191		547	116	68	399	3079
6957	125		15	170	321	250	17	341	159	106	51	15	41	33		374	253	42	347	1325
6960	164		8824	206	343	215	22	84	193	89	22	52	47	44		459	451	230	362	1663
6966	125		622	635	804	805	18	521	360	121	47	43	148	38		554	269	0	350	3944
6970	168		2318	330	677	98	4	345	454	160	46	35	106	64		570	98	67	632	1326
6971	78		9	421	661	397	53	253	484	104	62	45	166	94		619	489	27	740	2502
6973	57		61	151	297	74	14	78	227	51	7	19	46	38		181	201	18	230	1355
6974	79		1033	165	413	73	36	117	236	298	61	60	67	111		278	193	86	208	1783
6976	65		9449	99	295	52	4	83	171	28	11	19	16	26		112	70	10	128	1124
6979	50		40	243	495	475	19	215	309	16	93	48	83	74		995	79	105	844	2897
6989	135		83	409	726	207	8	738	544	115	42	66	87	74		420	225	35	363	2013
6992	159		6677	89	206	32	14	212	239	128	28	16	37	74		243	224	14	179	913
7013	135		217	376	524	414	39	569	607	174	31	42	129	36		459	477	85	317	3936
7028	263		4664	281	658	530	5	600	281	117	3	14	51	14		238	66	24	184	2585
7033	89		27	564	1021	222	36	549	872	162	73	41	23	162		767	193	122	598	4871
7058	82		12439	44	79	98	4	105	152	89	5	25	42	40		92	74	12	98	806
7067	80		386	89	196	36	3	212	185	74	9	17	24	44		150	36	30	245	946
7094	134		1028	97	611	642	2	305	505	90	22	9	48	42		346	135	99	244	1783
7102	244		2516	192	272	137	4	43	214	144	19	50	43	78		236	19	31	211	2428
7103	195		99	175	437	110	3	381	375	124	10	27	38	32		382	178	65	276	2425
7106	220		2474	107	337	224	5	341	226	144	9	13	9	12		105	57	51	100	1717
7107	57		8840	907	906	809	16	601	420	181	20	22	84	7		656	160	41	392	1395
7111	56		6764	80	376	503	12	257	358	81	4	20	30	59		186	176	52	193	1250
7119	166		3115	82	126	87	8	204	188	198	7	36	35	113		192	133	4	133	1232
7161	242		4584	162	338	59	8	62	188	91	16	27	24	45		253	26	20	189	891
7164	71		14679	146	303	128	5	167	176	140	10	6	77	82		187	79	49	265	1096
7165	115		10083	458	681	490	28	723	639	198	19	21	91	15		338	235	130	329	1561
7167	94		650	207	386	392	51	488	413	286	66	75	170	186		442	253	85	407	2531
7169	169		292	162	411	290	11	83	163	61	18	15	32	43		198	8	16	140	1113
7186	41		2974	75	218	147	3	85	161	137	13	9	24	32		61	7	0	26	1230
7202	255		7025	57	162	25	23	76	135	127	6	19	43	56		147	31	55	143	1553
7218	153		8862	141	297	199	0	220	164	49	15	34	29	62		164	10	14	111	1040
7231	112		735	330	404	334	17	413	468	135	19	15	54	49		584	280	74	378	2734
7244	219		29	77	647	714	41	497	605	75	10	10	36	12		171	115	24	111	2778
7248	159		108	187	317	82	6	403	443	174	10	36	2	53		325	54	27	256	1287
7250	201		73	260	643	373	5	604	268	94	15	18	16	31		323	21	49	397	1796
7263	119		34178	239	185	170	9	214	191	123	14	26	46	55		255	71	36	190	620
7282	197		1759	39	138	191	6	164	198	44	6	23	11	86		136	60	62	55	1894
7288	82		53	157	423	338	11	292	254	107	16	76	61	74		268	95	102	249	1578
7296	94		5	27	140	19	7	190	252	154	2	20	10	6		60	37	6	80	1404
7308	161		141	82	316	434	23	245	255	75	20	12	24	75		193	39	41	191	909
7316	88		266	233	397	115	2	253	329	93	55	42	59	55		354	174	51	395	1515
7320	23		20221	692	390	326	3	632	402	47	38	56	41	30		340	503	58	350	2831
7322	104		665	29	26	28	47	39	33	81	23	27	13	72		38	17	11	46	1913
7327	150		2773	202	398	127	30	335	262	115	60	60	36	55		295	72	15	237	2231
7328	93		29	28	42	24	9	20	23	81	36	58	14	61		43	39	5	131	3030
7330	49		842	119	199	45	17	83	117	185	32	15	22	102		385	295	1	301	1310
7346	67		948	186	307	250	11	288	247	201	45	67	76	55		416	277	53	360	2272
7350	36		5307	132	222	212	5	299	244	70	15	42	28	20		295	371	22	341	1326
7353	42		3300	220	365	83	4	383	409	100	65	14	69	89		424	90	69	344	1001
7354	94		5956	401	724	601	22	572	310	228	106	65	147	39		876	361	100	746	2667
7355	41		820	194	353	66	9	81	155	94	35	23	78	119		276	282	27	410	909
7372	105		2166	70	154	107	26	105	71	119	56	37	11	79		102	76	30	106	2306
7373	194		15	34	179	312	27	165	168	53	12	15	27	65		224	105	0	180	1343
7377	237		89	208	428	96	11	371	390	191	25	41	16	139		334	149	60	276	1421
7384	11		675	225	367	258	2	7	73	5	16	20	67	15		300	392	55	326	1058
7396	92		5810	83	187	95	16	81	86	108	25	19	16	101		91	87	42	80	1466
7404	154		62	513	531	618	9	507	582	180	99	91	143	88		698	121	83	607	1975
7413	57		4644	157	174	229	10	191	142	165	18	13	37	43		326	52	22	218	1038
7418	101		21	126	161	104	0	0	17	134	51	16	41	134		301	159	0	187	2001
7424	91		1893	139	236	235	44	481	308	224	95	43	62	76		391	117	32	252	2574
7427	155		25	206	307	305	13	321	222	245	53	48	63	131		272	249	9	305	3689
7458	45		416	259	359	377	11	264	234	61	31	29	31	63		203	174	19	223	1640
7461	154		22819	174	323	181	5	184	101	82	15	29	30	28		215	64	41	170	571
7477	119		33	42	133	308	88	81	112	160	35	59	13	69		122	103	41	98	4392
7515	182		57	272	583	156	7	422	585	174	33	93	8	102		444	80	62	427	2253
7517	99		7718	153	277	320	7	267	264	176	45	12	35	77		239	101	33	317	1209
7521	131		30	72	134	110	11	227	151	98	84	19	74	78		180	167	10	202	1231
7717	193		29	655	986	714	158	784	597	223	110	142	279	181		1024	738	495	755	5380
7917	128		9664	45	97	24	18	155	125	183	65	79	5	143		221	167	58	156	3037
8077	101		166	422	812	189	23	452	695	136	37	21	77	82		649	149	63	725	4463
8132	153		1206	333	547	465	44	287	279	173	24	23	67	66		302	92	82	208	1675
8231	99		91	250	470	384	23	112	341	175	14	11	66	18		256	33	40	202	1603
8233	75		99	152	361	100	25	362	575	99	11	23	2	57		235	53	37	241	1584
8234	184		1583	421	737	539	76	267	453	195	98	46	107	168		566	306	103	599	4759
8235	100		1414	87	172	135	1	192	120	97	12	20	17	25		179	95	53	122	735
8236	109		9	170	404	54	24	172	228	126	33	18	48	30		311	138	75	147	986
8238	105		952	541	580	475	252	466	577	149	202	67	202	86		715	111	108	601	5682
8239	306		10	261	383	76	29	369	575	330	67	50	87	47		489	185	22	460	2951
8244	130		867	468	933	362	115	437	384	230	142	125	84	241		680	164	120	656	5884
8246	112		66	339	490	305	131	297	483	177	78	34	112	81		369	306	35	392	3035
8247	69		5691	154	228	161	17	179	233	86	19	13	45	35		179	106	40	218	1013
8259	126		7689	201	341	212	19	98	238	44	81	15	81	28		360	275	19	227	1590
8264	183		10	31	62	15	11	71	61	62	24	21	16	49		43	11	14	68	2130
8266	122		3	308	559	296	13	88	354	91	37	13	114	68		432	178	131	306	1976
8275	103		132	222	160	67	5	248	232	131	50	11	30	44		140	238	0	203	896
8284	126		14	85	201	56	0	122	178	93	16	12	50	41		211	44	25	97	796
8290	112		174	157	235	121	13	220	190	106	9	24	52	33		218	90	37	227	1153
8297	115		43	166	309	167	15	92	250	136	22	26	94	42		225	28	37	206	1686
8325	97		4284	200	343	256	5	316	166	143	26	10	46	86		158	29	31	176	1565
8334	51		18481	86	210	203	0	188	158	69	6	31	17	43		106	26	12	68	1107
8337	33		5941	205	317	204	47	105	204	101	18	48	64	51		437	439	32	312	1474
8343	134		26	288	420	301	34	86	345	144	21	68	34	60		349	53	38	272	2792
8351	160		14608	118	366	175	5	151	208	36	6	18	36	66		200	114	35	217	1010
8353	270		1864	210	703	334	33	101	252	55	3	25	37	34		250	27	39	302	1561
8357	130		49	109	210	107	4	201	137	74	19	21	35	93		230	197	17	307	1473
8365	131		2057	92	265	158	4	241	146	159	21	21	23	62		131	102	29	168	1018
8366	110		15	269	459	449	16	435	318	115	30	33	76	12		685	274	201	309	1988
8378	94		258	74	96	102	20	91	111	129	59	64	25	84		114	27	31	178	2088
8386	94		11703	74	283	45	15	55	132	117	7	12	11	37		135	66	43	87	824
8419	108		74	184	372	92	48	269	343	97	77	63	26	122		278	128	1	182	2684
8424	253		19	84	362	54	43	323	355	156	59	33	73	137		271	98	78	265	2858
8428	126		24521	135	257	210	2	146	104	78	6	10	15	28		173	30	14	123	636
8430	101		33	136	228	164	0	164	187	77	10	14	33	25		124	8	24	97	759
8472	55		5426	207	157	156	4	261	203	93	13	9	26	64		226	283	76	248	2537
8584	211		64	47	187	32	1	203	182	177	6	13	3	40		103	19	34	179	1015
9067	79		9979	254	557	299	73	303	271	135	66	10	242	97		365	3	40	404	3064
9075	133		32	571	894	549	42	558	528	110	171	81	192	165		563	11	92	573	5579
9078	142		32354	339	604	346	24	462	332	116	94	21	141	89		395	4	73	420	3389
9079	161		28691	143	411	79	16	254	257	136	23	4	71	96		223	4	40	294	2597
9081	94		15931	494	703	425	151	451	530	99	117	23	162	171		659	14	108	556	7105
9084	100		19653	409	567	420	65	497	425	163	95	45	171	93		574	398	41	594	3463
9085	102		17886	388	495	361	50	463	376	156	76	33	132	82		492	341	44	543	3840
9089	85		22549	432	616	350	54	155	369	95	76	24	41	122		531	6	78	531	3541
9091	118		31501	285	387	279	42	276	178	73	60	27	89	53		254	8	36	264	2650
9095	93		37695	199	288	157	33	91	173	125	56	31	80	58		302	7	39	296	2674
9099	126		114	308	390	251	39	409	281	128	21	28	104	50		289	4	50	354	1616
9100	109		22425	47	60	50	13	20	53	100	21	28	32	128		60	79	9	83	2321
9102	129		97	119	244	132	31	52	134	111	50	49	32	133		149	117	21	198	1890
9103	96		8255	113	270	146	71	121	153	82	55	22	38	103		173	1	36	200	2261
9104	132		20141	82	95	72	9	31	73	79	17	33	18	64		105	85	18	129	1447
9105	65		42340	188	227	113	20	34	124	157	21	37	98	31		135	99	26	146	2301
9106	88		76679	250	403	218	45	65	214	73	16	41	77	85		292	3	68	316	3180
9111	72		25001	141	283	144	32	59	122	74	60	29	43	115		141	108	16	190	1977
9113	86		62	288	450	268	33	83	243	115	57	57	73	93		445	3	56	382	3117
9114	107		7330	174	313	148	26	52	161	91	27	17	40	127		184	141	16	252	2973
9115	89		9188	147	274	135	19	46	166	94	21	25	29	70		118	88	10	173	1983
9121	79		35307	220	347	291	125	304	316	127	96	18	98	147		385	208	113	238	2836
9125	156		41616	224	300	246	107	317	317	139	67	64	61	161		365	232	143	238	2528
9128	132		29376	367	489	381	181	426	495	222	116	76	120	202		659	371	205	401	3525
9130	108		35887	288	460	334	170	433	467	216	140	72	120	258		513	335	181	446	3166
9131	128		29552	249	489	299	154	310	447	176	65	29	83	146		462	303	143	350	3248
9133	138		32066	376	671	467	153	424	633	168	120	58	131	221		708	412	147	546	4723
9134	115		18873	282	489	348	177	408	484	189	129	83	98	192		586	364	160	361	3735
9298	112		2965	293	564	109	14	375	421	135	14	33	96	82		417	48	74	416	2555
9312	148		22	805	804	511	20	702	665	138	39	31	235	63		509	307	64	535	5352
9314	120		189	302	450	106	13	324	400	129	56	71	133	60		441	107	80	437	3263
9321	66		3224	128	307	171	4	166	236	71	12	2	120	17		233	17	21	229	1017
9386	97		18941	112	249	185	6	306	222	114	20	21	40	118		165	89	18	185	326
9388	41		243	91	224	153	2	220	181	70	12	15	73	42		200	23	15	215	678
9404	68		6132	128	162	141	12	164	235	138	11	13	14	74		122	67	30	135	747
9405	100		7501	129	223	147	18	193	276	34	14	10	21	30		156	84	29	211	982
9408	96		3222	48	152	84	5	26	214	76	10	13	7	29		81	60	8	105	626
9409	68		3167	111	230	108	9	30	115	110	7	8	26	16		88	114	38	108	726
9421	42		206	83	97	21	0	95	127	174	16	11	15	56		174	98	19	60	766
9433	241		42	147	272	126	8	58	144	105	20	29	72	34		229	133	42	141	1307
9451	42		5054	103	165	179	12	149	148	54	9	12	20	35		60	84	2	77	1048
9503	133		138	250	441	192	14	178	221	81	12	26	53	41		267	142	26	284	1580
9506	219		41527	273	441	228	8	356	281	155	51	54	76	193		337	64	26	329	1759
9507	109		10734	85	220	85	7	34	90	179	22	39	0	45		355	130	16	368	1179
9508	336		514	486	824	1088	62	158	483	79	32	81	145	83		632	780	97	644	3472
9509	198		1130	160	634	651	31	79	201	172	31	77	34	40		287	63	63	407	2480
9510	134		26	163	377	224	0	248	146	276	17	10	16	47		205	0	62	192	1472
9511	362		3855	247	467	208	15	77	221	174	28	44	21	30		228	112	61	337	1612
9512	120		4834	126	357	217	0	229	150	135	10	64	26	25		120	95	13	191	1563
9513	404		3505	208	351	233	39	115	91	148	20	30	27	43		273	3	98	208	1739
9514	159		3759	221	437	291	2	318	151	147	9	30	30	31		284	0	149	282	1519
9515	197		4302	159	320	253	5	177	134	140	45	33	22	29		125	78	18	211	1499
9516	309		11	100	291	202	5	219	138	163	29	69	28	56		195	15	42	279	1256
9517	372		3110	96	307	33	0	47	149	272	8	33	26	8		151	11	20	199	1146
9518	198		3793	271	498	102	14	279	248	140	99	40	41	80		562	75	66	603	1579
9519	126		182	412	562	386	55	157	433	81	103	37	86	27		454	247	127	641	2755
9520	43		69	290	344	255	44	132	285	53	35	15	159	59		331	242	131	452	1880
9521	54		545	133	366	229	7	88	156	36	14	24	26	37		267	23	40	263	787
9522	159		9	284	432	331	1	301	273	102	43	54	32	55		214	246	63	374	1709
9523	130		111	182	239	144	10	39	133	77	23	15	66	99		265	68	28	414	1239
9524	329		37077	365	515	301	29	107	223	70	51	18	74	54		472	143	62	608	2268
9525	228		21	305	343	60	14	358	348	109	83	21	244	66		417	110	25	441	2541
9526	98		54	248	569	92	6	367	427	153	21	42	28	81		178	93	19	213	992
9527	139		143	169	370	232	6	51	171	134	8	17	44	70		268	196	92	375	909
9529	78		7687	161	259	250	1	277	190	85	79	44	21	88		372	94	51	503	2154
9530	66		141	140	106	81	2	150	112	67	21	35	20	73		197	0	13	332	740
9531	192		45	283	297	245	0	184	224	159	16	38	50	51		530	0	40	481	822
9532	75		101	122	198	233	0	59	143	64	3	8	22	104		354	3	43	235	1215
9533	123		3257	161	407	124	12	41	493	112	30	22	49	83		272	3	39	192	952
9534	117		6082	81	208	102	2	165	112	55	17	14	37	93		91	16	8	120	907
9535	123		58058	262	284	40	3	219	240	51	12	26	37	144		307	101	45	437	1040
9537	117		100	198	385	225	4	355	236	120	21	39	19	26		298	498	57	345	2121
9538	231		26	167	345	163	38	213	252	108	31	31	67	106		245	115	43	238	2107
9540	99		9	145	242	179	7	201	169	82	14	21	113	50		165	239	43	296	1262
9541	121		2307	269	293	169	8	57	146	65	5	0	43	98		317	599	29	440	955
9542	104		1406	82	337	124	13	65	449	105	35	6	28	163		266	162	39	198	1071
9543	174		2398	135	195	1	5	276	228	149	13	28	51	56		216	8	48	264	1371
9544	175		12441	114	187	169	33	80	71	74	17	33	21	84		108	135	21	212	970
9545	240		5851	127	350	297	6	45	94	118	12	17	33	28		177	0	52	153	957
9546	61		140	34	307	28	1	265	146	258	10	10	10	102		108	30	9	207	1001
9547	50		41	117	384	148	2	225	176	148	18	33	26	7		239	32	7	228	1487
9548	84		15	206	549	217	1	294	222	219	10	22	88	17		255	14	30	303	1210
9549	198		3154	187	894	700	27	110	198	563	23	23	52	95		259	24	21	41	1541
9550	113		7107	86	302	212	1	154	117	184	41	34	31	73		99	7	9	116	1135
9551	471		17	79	219	18	3	20	97	165	8	14	24	67		126	24	49	152	679
9552	198		43	147	191	150	25	40	114	47	16	45	33	111		150	119	61	212	959
9553	285		112	121	202	197	1	31	99	129	14	13	35	35		255	32	37	234	2038
9554	202		1515	198	376	454	25	67	139	196	12	8	43	71		371	4	103	372	886
9556	164		272	155	255	55	3	204	143	121	33	17	33	80		183	108	13	213	1003
9557	113		52	182	329	81	0	216	202	273	19	29	162	75		266	31	47	253	1205
9558	166		16	248	442	221	31	132	267	98	22	14	240	122		330	146	61	341	2025
9559	183		76	224	509	456	0	53	52	125	51	30	45	93		316	44	44	424	1174
9560	191		86	236	414	224	9	176	291	163	39	25	70	43		243	302	64	337	2611
9561	119		5224	302	323	205	12	114	256	57	17	31	93	76		342	261	119	654	770
9562	197		10	414	486	277	13	698	331	224	62	28	317	94		444	725	95	763	4341
9563	238		69	158	282	242	2	327	329	163	6	17	99	95		381	174	132	341	1140
9564	301		3731	263	548	77	18	485	498	220	59	64	90	71		566	115	43	381	2069
9565	316		6675	258	439	238	46	65	242	169	85	31	66	33		344	89	85	407	1788
9566	237		4746	316	613	71	9	101	290	95	36	17	67	27		361	188	70	452	1763
9567	261		3580	247	491	141	11	460	280	204	34	10	230	35		484	62	74	428	2859
9568	171		26384	434	573	357	32	128	425	136	107	42	119	97		501	183	51	722	3647
9569	224		3852	187	306	204	27	330	299	96	55	27	66	208		289	89	75	381	1890
9570	236		48	167	356	100	5	191	128	216	30	25	58	50		273	34	57	339	1179
9572	36		78	334	485	91	13	482	400	26	39	68	219	90		549	138	103	687	2511
9573	108		140	73	170	33	4	206	108	63	9	6	13	117		222	44	24	249	1209
9574	133		2	296	798	479	17	193	409	362	52	14	94	84		493	21	61	506	2478
9575	80		72	143	440	67	20	108	228	92	29	4	37	36		313	32	30	351	2013
9576	183		25211	196	374	312	5	90	219	165	41	17	97	53		329	87	96	503	1971
9577	101		28670	159	397	176	2	287	239	388	39	27	53	94		283	73	30	307	1468
9578	229		39	156	472	256	12	244	173	101	16	35	25	43		283	33	64	180	1606
9579	306		2478	213	439	37	4	67	202	150	35	34	51	83		206	39	30	317	1160
9580	69		119	237	387	249	3	56	156	237	17	20	23	30		291	0	101	192	1192
9581	214		15675	157	437	59	0	245	196	236	16	25	36	65		197	9	22	244	1140
9582	223		13	234	481	172	10	372	203	522	41	25	74	153		333	67	44	305	2554
9583	122		3107	253	456	83	1	241	333	275	47	44	54	117		220	19	122	209	2599
9584	69		7082	219	413	55	52	151	360	15	35	45	56	39		474	470	70	627	2192
9585	105		2751	297	482	71	14	355	306	23	66	25	92	36		484	84	77	552	2894
9586	159		64	223	462	594	3	445	139	147	25	20	71	94		395	47	56	301	953
9587	184		83	349	503	126	23	133	284	136	0	33	46	110		352	49	12	355	1473
9588	177		21960	242	320	191	1	444	576	267	44	12	83	91		434	77	29	336	2160
9590	179		95	76	134	82	1	14	44	8	10	16	38	75		176	16	9	183	1038
9591	103		39	184	283	114	24	46	174	55	34	78	66	75		345	96	60	333	3138
9592	61		17955	385	526	109	23	192	339	181	92	38	49	154		335	77	20	461	1583
9593	61		16291	105	207	130	12	231	226	167	16	29	27	45		279	184	106	369	1330
9594	304		29	190	377	94	5	243	190	225	24	17	101	96		207	141	26	334	1106
9595	91		16088	488	450	264	11	141	366	65	47	40	65	61		387	5	146	427	1265
9596	64		8212	226	524	624	90	114	346	76	28	66	102	91		512	126	119	691	1908
9597	81		350	302	366	309	10	123	187	86	12	19	77	13		404	179	49	442	1208
9598	149		1317	214	774	815	26	132	225	211	16	33	77	91		307	162	160	318	1538
9599	157		77	129	320	219	1	48	141	67	4	9	25	73		204	95	0	235	1363
9600	176		107	180	348	405	26	60	166	89	49	30	58	135		566	338	158	242	1391
9601	215		401	114	296	198	4	295	195	53	53	11	33	76		184	122	28	233	1772
9602	196		42	340	439	510	90	475	402	106	113	51	147	184		583	433	141	523	3550
9606	94		866	192	401	255	25	292	238	119	25	49	47	20		486	123	90	525	1037
9607	107		9022	95	270	164	6	186	210	107	45	15	80	71		264	173	61	198	1290
9608	133		18445	75	193	425	9	366	262	250	16	34	38	33		435	187	98	315	822
9609	197		174	136	254	191	15	302	240	139	21	47	36	66		347	268	86	232	1660
9610	132		1223	170	389	281	23	550	406	99	32	40	73	74		416	399	109	218	3648
9611	162		4894	202	539	224	8	547	272	125	30	36	52	77		460	231	114	437	1026
9612	117		9930	186	363	199	21	331	181	166	26	23	54	118		359	281	173	254	1335
9613	148		907	70	175	111	3	187	168	70	13	17	18	44		151	77	23	165	1308
9615	123		7275	127	353	287	13	261	271	233	8	19	36	64		174	78	42	109	1302
9616	146		12838	181	385	318	17	328	300	182	20	28	70	59		467	180	94	283	1536
9617	116		17489	147	313	191	13	79	161	180	35	48	36	50		448	145	61	234	1119
9619	67		274	213	316	179	11	65	189	192	24	25	53	41		326	185	39	294	1277
9620	86		255	268	317	247	18	78	199	163	26	31	57	56		363	193	116	340	1297
9621	62		245	205	297	186	24	102	184	167	28	26	87	74		399	197	185	350	1150
9622	115		17	194	404	100	6	115	258	188	13	35	55	47		420	273	52	257	1384
9623	183		7	91	201	95	4	259	197	204	8	18	19	21		162	57	47	145	713
9624	66		31519	92	120	85	8	155	144	100	11	21	36	107		221	132	80	207	484
9626	97		6008	146	291	179	36	368	220	252	16	18	12	67		326	295	32	200	1430
9627	75		126	145	260	195	43	307	293	192	38	90	68	80		447	319	112	365	1782
9628	87		73	128	306	205	33	386	399	93	10	12	41	58		293	172	120	112	1139
9629	69		12968	201	360	172	21	409	253	146	13	32	49	66		360	202	150	201	668
9630	93		204	69	278	21	4	210	131	89	1	7	26	33		107	39	70	132	562
9631	123		4592	105	156	100	19	299	182	112	8	24	46	50		226	160	35	239	558
9632	65		8785	110	177	45	5	59	104	123	4	14	21	25		157	127	12	101	852
9633	89		227	174	228	76	8	57	124	122	25	17	46	77		316	161	83	245	938
9634	51		122	158	257	71	7	42	126	197	18	75	17	48		375	316	24	342	2232
9636	148		10069	91	138	27	2	31	93	125	12	19	18	57		163	125	34	167	583
9637	81		596	83	153	39	16	53	94	123	28	28	33	61		199	150	64	164	962
9638	113		65	65	156	85	3	39	79	138	15	24	24	51		229	88	53	170	523
9639	57		43	113	196	47	3	78	173	283	75	16	37	81		408	394	106	390	1002
9640	115		39	113	306	33	3	51	155	154	21	21	31	56		442	115	69	296	834
9642	71		57	124	213	19	5	62	112	125	40	34	50	72		365	240	64	317	810
9644	119		5983	127	206	185	1	181	228	198	18	8	44	52		219	112	34	222	806
9645	165		3123	140	359	240	2	107	300	127	16	14	37	80		430	333	23	293	1321
9646	121		8016	134	285	52	10	85	233	110	11	2	29	62		430	180	29	278	1824
9647	113		4280	204	367	233	34	460	358	133	34	68	52	68		453	118	39	350	1257
9648	83		6200	213	352	355	12	329	226	96	29	26	64	75		379	310	63	347	1143
9649	82		4550	274	377	128	39	135	268	178	131	57	68	111		393	510	37	377	3217
9650	102		624	73	129	83	9	94	162	69	6	7	18	48		186	81	52	160	962
9651	107		8809	41	118	11	4	76	104	28	2	25	10	30		137	87	54	107	496
9652	112		100	108	197	98	2	53	104	98	17	22	28	45		161	79	29	199	1468
9653	120		46	152	391	209	12	274	221	101	14	23	30	81		226	36	55	316	1637
9654	188		47	198	451	62	1	273	212	115	27	13	40	72		841	306	1	497	1543
9655	45		10008	212	359	339	35	368	290	103	44	28	58	66		387	411	48	402	2751
9656	134		105	362	371	274	23	429	304	172	27	48	80	187		361	485	60	441	3364
9658	81		51	247	382	76	12	167	248	155	29	39	94	76		367	272	77	392	1367
9659	85		3671	208	334	176	11	71	176	131	42	19	79	36		284	193	37	453	843
9660	66		837	362	513	288	14	78	205	79	28	29	72	27		288	238	12	341	3160
9661	89		7	120	259	26	5	64	144	88	6	18	36	43		213	127	55	287	889
9662	91		83	101	261	94	7	193	169	68	16	16	28	92		168	125	28	103	1054
9663	59		9251	49	86	62	0	50	84	43	0	8	5	24		16	9	7	11	938
9665	102		1285	64	266	137	1	71	73	142	20	13	11	54		228	56	33	122	684
9666	73		2593	225	324	384	14	331	249	187	26	23	87	16		513	246	33	415	2262
9668	121		1901	80	313	161	1	219	141	117	17	19	28	43		240	49	23	148	765
9669	168		8420	41	231	86	12	152	116	67	3	27	15	59		143	61	8	133	1199
9673	100		55	104	106	82	5	119	107	145	14	23	11	72		93	108	16	110	813
9678	113		134	234	279	179	14	71	174	112	25	41	41	64		285	153	23	213	1569
9679	151		1102	139	325	193	3	243	178	195	35	17	30	72		308	46	65	246	913
9680	126		1010	188	349	263	4	270	225	262	37	28	30	87		393	50	82	305	1025
9681	151		1847	171	358	195	1	248	197	175	32	16	16	51		332	25	68	264	922
9682	112		10964	75	109	56	4	174	100	90	6	14	17	57		124	50	34	130	879
9683	181		1167	162	315	192	5	245	164	218	20	11	21	66		317	25	58	215	806
9684	108		10	221	566	296	31	353	471	118	21	4	62	57		307	239	67	127	1941
9690	156		4818	213	294	218	10	422	249	126	15	49	51	66		281	56	31	291	701
9693	145		508	119	242	79	4	200	180	167	19	27	49	48		210	56	27	224	685
9696	94		5496	145	253	142	4	192	197	109	14	38	29	72		225	22	20	256	1620
9697	87		24866	151	251	170	21	69	153	103	17	12	34	70		337	57	60	246	725
9698	59		13506	172	176	195	21	322	243	46	30	38	208	181		358	288	2	300	748
9699	74		5527	249	486	82	20	97	333	91	42	14	74	61		354	427	42	262	2301
9701	89		193	132	320	236	15	219	163	109	27	25	22	69		280	104	30	206	1233
9702	118		58	168	369	186	8	64	143	160	22	15	34	54		293	160	8	286	1592
9703	153		7	118	240	136	13	70	124	169	34	12	59	66		316	232	46	398	1331
9704	93		366	393	550	143	24	108	323	130	65	46	78	142		433	148	57	513	3435
9705	65		30	89	148	53	19	49	132	66	11	24	52	41		238	289	41	226	1439
9706	193		169	361	623	174	24	127	344	73	45	34	37	36		318	155	51	252	1704
9707	116		142	97	176	48	21	208	167	83	15	14	45	122		165	61	61	216	1067
9708	59		102	16	54	53	1	65	55	123	3	1	10	41		38	5	4	19	1275
9709	132		61	159	359	48	0	313	319	52	20	19	48	10		365	66	44	298	1055
9710	106		67	194	296	231	11	327	237	91	14	19	36	36		266	188	45	263	1735
9711	144		14562	33	226	26	6	151	141	59	2	14	19	34		82	42	12	68	1097
9712	177		23	174	366	241	5	348	165	106	24	25	55	45		442	252	54	421	1083
9713	124		58	183	339	265	13	341	223	48	17	60	46	27		359	238	57	424	1954
9714	74		1495	186	265	154	7	42	144	68	13	30	25	19		218	34	61	184	1066
9717	155		70	89	164	223	4	175	175	30	9	4	35	61		129	119	19	161	1292
9719	100		29	165	287	188	43	128	179	120	72	35	57	46		443	100	152	331	1477
9720	121		1296	151	158	208	5	265	245	89	26	6	57	51		408	92	64	340	943
9721	99		348	184	368	320	5	260	255	55	15	37	70	22		312	150	40	269	2730
9722	42		2671	70	127	86	0	18	125	31	5	3	24	62		82	58	3	96	768
9723	113		1124	173	397	270	5	278	194	126	7	20	33	18		447	83	11	321	913
9725	80		22	72	239	143	8	156	198	63	6	7	23	25		162	23	31	141	824
9726	150		10906	221	351	239	8	304	290	130	34	28	42	16		321	137	66	309	1713
9727	119		1333	234	427	54	14	350	231	115	75	41	51	85		611	104	115	578	1326
9728	122		36	189	274	283	28	392	163	63	57	37	83	12		332	217	73	328	1027
9729	101		17	245	476	453	19	359	392	189	25	30	148	67		562	475	39	490	2448
9730	58		18083	38	71	71	2	73	55	81	11	6	18	69		80	35	3	92	806
9731	86		67	145	233	294	2	249	208	127	13	4	52	44		224	132	95	138	964
9732	133		10557	44	99	111	2	109	79	51	8	3	20	52		82	65	11	97	625
9733	136		318	192	292	40	6	253	242	117	35	10	66	22		303	139	128	157	1112
9734	101		1990	367	421	248	1	398	345	121	6	21	71	39		340	68	52	294	1182
9735	130		4047	106	179	174	5	144	126	105	10	14	50	44		207	125	14	192	1387
9736	156		185	192	252	203	4	371	212	120	40	23	34	66		342	31	63	348	1366
9737	117		1558	265	327	354	35	421	198	147	78	43	70	91		678	443	98	591	1901
9738	86		239	87	262	21	2	182	191	97	40	46	32	45		303	52	39	324	1441
9739	79		289	196	472	43	3	338	305	115	63	61	63	115		566	116	82	536	1457
9741	126		6270	93	192	159	10	189	157	97	13	7	31	71		159	141	45	95	861
9742	118		62101	240	491	267	10	95	254	144	54	26	36	62		495	277	95	333	1283
9743	106		12	40	161	118	2	150	164	64	4	5	6	10		102	52	16	113	995
9744	151		495	224	465	328	3	261	166	99	17	16	16	34		332	22	45	354	783
9745	125		7093	121	253	156	26	291	225	168	35	30	54	110		365	203	101	244	1002
9746	153		1609	97	218	30	32	109	217	105	18	18	39	70		231	292	27	181	1310
9747	130		1515	218	355	138	21	190	335	118	33	47	86	64		550	433	97	455	1839
9748	93		74	170	310	243	17	362	222	105	34	78	78	67		506	404	147	541	1078
9749	107		97	277	422	65	23	134	267	181	137	36	98	99		590	435	1	465	1645
9754	144		27	140	298	243	19	342	312	212	42	3	63	106		287	308	106	215	1752
9755	92		4177	109	190	154	17	484	220	99	37	41	40	151		304	58	43	315	1546
9756	106		6559	105	256	172	2	178	191	92	12	23	13	42		314	62	24	210	1063
9757	117		697	46	92	31	9	90	82	189	4	4	13	66		98	13	17	61	910
9759	81		167	209	388	164	7	51	189	131	9	7	46	57		215	0	34	283	1086
9762	102		6270	67	128	84	6	104	96	190	16	11	18	46		99	11	14	124	641
9768	67		6961	159	425	58	16	318	409	173	10	47	48	113		366	158	135	270	2985
9769	123		0	110	262	64	0	168	181	90	0	19	22	0		195	77	17	190	1452
9770	85		1639	251	556	151	19	435	403	237	44	30	85	49		304	147	131	227	2957
9771	115		14137	305	545	307	3	408	379	19	15	19	40	30		328	150	116	220	1884
9772	109		430	264	457	101	0	247	471	233	15	30	64	81		273	46	51	248	2842
9774	33		82	125	291	232	12	408	314	191	29	27	45	55		431	59	39	277	2533
9775	59		354	122	188	161	14	165	185	285	45	35	50	132		379	268	100	311	3013
9776	116		5116	124	169	161	8	254	259	73	20	43	26	49		344	38	50	331	3074
9777	77		108	127	429	205	20	124	316	253	18	44	44	38		289	163	182	230	1442
9778	294		188	22	211	338	0	165	230	221	16	27	12	24		192	25	28	135	943
9779	31		68	280	318	270	24	442	418	218	45	33	46	106		592	326	141	463	3216
9780	70		4532	131	184	33	7	276	246	31	12	23	48	93		270	62	15	195	1743
9781	87		261	224	289	347	6	485	224	60	41	43	35	76		422	140	76	339	3814
9782	34		100	76	214	235	13	264	167	63	21	30	41	102		278	156	101	291	2506
9783	125		11	282	298	457	166	550	303	236	84	90	80	239		550	130	65	466	3887
9784	101		11532	139	226	237	5	191	214	155	9	16	36	34		246	82	85	199	811
9785	105		2928	87	207	43	4	203	199	42	12	22	15	30		135	99	8	155	1545
9786	46		21	127	338	177	24	387	270	248	39	40	82	111		477	226	107	324	2351
9788	176		2114	158	294	86	10	290	267	193	23	19	64	64		290	107	171	172	3100
9789	49		3500	367	710	188	4	637	489	31	21	32	54	28		647	316	98	444	2088
9790	66		91	136	489	196	13	84	215	189	0	5	22	20		117	19	64	93	811
9791	137		25	271	408	71	3	495	345	228	15	56	86	53		312	188	0	243	2178
9792	82		45	95	279	265	11	335	181	85	22	36	50	100		441	229	0	365	2925
9793	175		8229	124	455	212	40	119	397	223	14	29	57	9		307	120	165	269	2053
9794	112		179	212	379	395	30	437	275	141	28	60	46	71		456	67	49	304	2982
9795	79		287	194	256	58	22	453	276	52	46	24	50	80		284	507	101	276	4342
9796	57		1351	88	346	550	23	318	303	173	28	33	62	100		316	419	166	363	3145
9797	89		20	156	331	166	0	345	324	180	14	23	66	10		241	36	26	129	895
9798	52		8	124	325	129	13	344	266	29	9	0	39	19		106	0	25	104	1016
9799	117		69	102	128	91	24	257	187	143	13	11	33	65		217	102	89	146	905
9800	128		8793	267	764	415	21	236	428	161	15	17	47	21		362	105	225	197	1901
9801	82		540	100	311	52	3	324	203	48	7	14	19	48		105	18	60	103	1019
9802	26		99	186	394	284	13	511	203	43	12	16	67	20		241	201	213	275	2619
9803	74		1893	137	184	176	19	307	150	190	35	24	30	145		370	404	16	410	3093
9804	73		1021	217	398	114	55	592	389	54	88	30	74	103		536	128	66	361	3562
9805	124		435	142	279	36	15	315	185	169	9	20	45	86		279	94	92	176	997
9806	125		86	140	367	51	10	458	271	64	0	56	69	21		315	74	41	191	1306
9807	87		2610	227	679	128	35	568	442	133	31	39	52	65		394	350	222	282	2763
9808	85		54	153	280	101	22	300	276	140	46	39	75	98		299	339	214	276	4173
9809	62		781	231	337	130	24	448	370	127	27	26	43	126		427	325	16	258	3479
9811	64		2197	119	220	167	13	274	183	76	14	26	23	50		420	279	0	329	4338
9812	98		933	168	300	164	10	220	175	114	29	26	70	174		394	288	93	221	1696
9813	68		4847	135	296	285	1	292	154	170	11	37	61	92		290	209	160	313	2027
9814	63		6721	91	158	148	7	186	127	16	23	29	23	36		232	196	137	209	1673
9815	30		734	108	182	180	12	267	206	41	28	27	49	176		346	486	12	360	2217
9816	47		1198	168	297	297	17	503	257	73	41	36	96	155		684	400	146	524	3413
9817	101		3714	171	269	203	13	66	154	5	4	13	24	21		191	281	16	212	929
9819	26		555	53	136	92	5	10	41	27	0	3	28	48		146	59	18	115	883
9821	26		26	138	215	120	9	86	181	105	5	8	11	6		321	43	14	256	1434
9823	101		35	41	87	32	0	32	49	59	0	7	13	24		127	29	6	136	663
9824	88		3583	115	151	25	1	155	169	91	14	0	13	48		189	85	56	209	758
9825	84		294	147	255	119	12	47	144	28	8	10	29	44		204	175	33	164	929
9826	26		1462	256	375	268	28	93	260	24	1	7	41	53		220	52	40	210	681
9827	76		32	63	163	72	1	10	75	154	9	14	5	71		196	229	23	233	1056
9828	46		226	47	142	27	4	18	40	30	1	4	10	28		59	7	7	26	585
9829	49		1932	41	141	80	5	13	80	50	1	6	6	13		46	0	12	40	398
9830	60		3912	213	385	330	33	472	395	129	30	25	41	85		637	11	121	352	1131
9831	58		48953	246	284	206	24	205	186	55	11	5	16	52		138	17	22	171	693
9832	160		1824	136	238	190	3	316	198	331	13	28	26	23		175	7	57	80	1387
9833	105		140	227	504	77	15	74	282	58	21	9	38	10		216	123	16	174	1593
9834	54		2144	236	505	277	27	631	220	33	70	64	217	52		305	797	19	462	2086
9835	106		99	176	214	123	6	208	153	34	28	9	45	70		170	154	16	85	1261
9838	75		15	43	138	22	3	17	73	84	14	8	4	35		79	8	43	41	661
9839	32		9256	147	313	145	3	95	84	49	3	3	28	57		109	64	29	123	1075
9840	123		474	84	119	37	9	162	66	35	18	21	21	72		115	100	24	179	932
9841	154		36	227	322	446	34	390	322	114	114	50	268	24		624	516	63	403	3893
9843	114		34	227	424	338	65	84	296	61	44	7	89	21		460	405	62	294	1727
9844	77		30	93	310	339	8	368	297	104	2	28	65	5		300	70	59	295	809
9845	267		5	406	416	391	0	212	461	97	50	21	112	63		772	744	49	357	3730
9846	72		464	226	439	390	4	530	328	58	21	10	58	24		543	279	80	483	904
9848	74		15238	202	434	215	1	309	248	109	12	4	59	12		216	122	22	124	535
9849	157		5226	176	323	212	60	102	360	122	128	18	86	100		406	152	51	318	4421
9850	106		7786	100	201	112	5	41	57	99	5	42	5	82		185	37	43	243	642
9851	130		221	71	128	41	5	44	86	95	50	31	29	80		309	30	19	272	1365
9852	98		3011	200	399	289	51	105	295	52	64	57	138	34		497	472	80	314	4730
9853	82		30	134	201	262	5	258	156	104	29	32	52	67		719	400	1	645	2745
9854	137		6466	170	210	164	9	206	200	60	6	34	53	74		339	68	49	312	615
9855	101		170	199	214	139	15	24	148	55	28	33	52	49		208	180	68	357	1430
9856	193		593	261	341	520	39	511	435	82	127	91	127	28		740	251	57	471	4465
9858	83		2028	208	317	230	36	81	192	74	31	29	18	64		491	428	58	314	1902
9859	63		149	256	352	197	34	66	148	37	19	79	34	55		191	283	62	273	1659
9860	52		770	54	174	73	1	155	97	25	3	7	16	30		134	55	21	96	488
9861	42		179	84	310	166	1	301	232	134	20	6	105	11		423	42	40	340	869
9862	125		44295	176	418	69	7	244	339	70	10	16	29	23		199	106	30	260	1054
9864	99		151	145	379	164	16	73	407	38	8	10	8	24		189	17	37	236	542
9866	111		13531	54	141	139	6	75	79	145	30	6	94	66		250	173	60	252	1111
9867	144		152	246	350	445	30	492	193	202	67	35	56	76		432	121	56	358	952
9868	85		9998	97	186	29	0	128	189	109	10	2	6	45		105	39	21	156	697
9870	79		39	165	403	72	4	130	119	138	16	11	58	33		79	31	43	233	654
9871	87		1573	93	257	50	9	223	208	227	6	21	17	49		269	82	57	133	1437
9872	101		17	127	226	148	15	215	178	103	18	20	23	45		283	117	22	262	1289
9873	69		44668	230	306	179	13	99	238	157	16	21	61	45		287	80	68	265	1049
9874	115		60	59	183	77	0	136	81	18	20	11	21	18		137	20	8	163	417
9875	167		190	173	257	229	5	307	208	129	9	35	59	44		335	38	55	255	944
9876	304		32285	122	245	22	0	221	202	104	21	37	24	56		267	230	100	369	1247
9877	37		3748	106	461	383	13	60	150	96	9	6	36	46		169	36	30	181	1817
9878	134		4390	252	609	300	12	121	260	92	22	14	60	44		260	43	32	218	1068
9879	211		4890	163	777	302	2	490	169	234	5	53	54	30		286	0	5	113	600
9880	41		6250	65	147	23	1	101	112	31	7	11	11	71		259	3	22	19	903
9881	395		4029	127	331	154	6	29	167	109	14	25	11	39		168	11	30	165	830
9882	242		331	173	528	153	4	437	162	74	5	25	74	61		294	127	104	344	1141
9883	171		5	187	476	236	6	120	291	132	10	35	23	14		300	92	40	274	1097
9885	244		75249	182	476	305	7	166	218	203	33	19	62	35		336	106	19	296	1235
9886	121		22687	326	493	259	31	698	315	209	65	52	88	82		571	114	65	447	3521
9888	132		59	398	548	162	37	206	294	85	109	118	301	42		492	228	61	443	7849
9890	183		20	70	191	357	10	66	120	260	21	29	33	119		238	47	26	173	1694
9891	87		2	241	339	403	89	260	886	110	203	21	133	157		484	850	53	520	4125
9892	113		28	169	317	88	17	106	239	73	29	32	72	46		550	350	91	598	2198
9893	224		7	329	534	601	114	701	391	281	24	52	94	39		468	665	61	436	5389
9894	59		929	460	292	414	25	384	280	300	43	10	77	73		214	234	35	200	2039
9895	46		52	233	310	130	20	397	187	146	69	21	69	135		507	93	36	373	2500
9897	48		16	283	332	108	24	112	375	260	74	39	127	186		484	476	95	519	1526
9898	53		6	295	497	329	25	164	337	39	27	28	353	75		641	642	41	489	3316
9899	116		59883	105	299	119	2	217	145	77	18	23	115	35		273	22	21	160	699
9900	161		5424	331	416	331	25	320	303	129	64	60	68	67		536	1	171	568	1473
9901	130		287	86	292	48	6	32	123	50	6	1	60	17		82	16	10	41	745
9902	139		3339	140	289	167	20	80	214	129	45	35	52	73		439	90	38	327	2899
9903	90		461	112	272	111	8	42	102	77	6	22	41	39		275	19	33	256	1288
9904	89		533	178	363	372	20	318	225	212	39	61	59	88		412	375	33	510	4001
9905	87		4434	299	852	397	31	294	573	239	52	21	62	59		768	408	49	577	2269
9906	62		1094	173	296	83	4	178	250	122	8	7	10	20		277	162	32	174	1448
9907	68		1021	88	148	374	15	235	225	65	13	11	47	51		191	171	72	172	961
9908	101		3017	241	326	264	39	170	262	149	52	59	133	148		420	198	95	252	1750
9909	97		22650	32	254	257	11	189	278	71	5	19	17	21		105	40	9	78	1234
9911	150		12	89	252	39	18	303	122	64	23	49	15	140		280	7	36	246	1365
9913	189		68	50	72	44	4	48	75	83	18	19	34	56		134	65	22	180	491
9915	54		9217	184	284	171	11	74	189	115	26	41	47	95		367	382	18	378	2628
9918	102		12	100	209	133	6	60	156	95	12	30	44	25		348	150	39	187	961
9920	93		612	114	343	186	1	60	233	82	5	7	32	17		385	32	9	179	707
9921	99		35	264	422	178	4	156	269	81	7	24	64	43		356	189	37	247	1739
9924	80		5	185	190	109	3	137	180	117	10	28	28	92		185	164	45	208	2945
9927	127		37	186	557	130	4	358	457	94	39	24	64	13		226	203	39	291	1881
9928	156		90	269	565	435	24	211	306	293	34	48	127	35		349	46	55	255	2382
9929	111		40001	10	127	147	1	111	119	65	1	16	10	12		82	37	15	78	904
9930	61		53	116	340	298	6	96	233	82	10	9	30	47		246	50	45	193	1540
9931	127		2022	45	96	63	5	57	101	92	10	32	38	43		79	65	29	75	697
9933	219		5190	38	215	106	1	162	158	137	2	11	8	28		172	43	40	117	1035
9934	82		36	211	352	309	1	168	319	72	28	22	111	47		567	145	89	419	3373
9936	76		1	75	259	346	23	254	329	133	22	8	42	41		220	35	44	198	1916
9937	97		23779	254	424	104	4	78	191	34	12	17	20	48		119	69	9	159	3039
9938	88		7384	433	446	294	2	414	338	47	19	42	59	44		341	58	48	291	2142
9939	122		6602	157	338	80	16	73	290	116	54	30	44	41		306	64	28	361	2007
9940	84		1624	114	282	147	5	39	125	45	7	5	7	8		71	13	33	99	1174
9941	77		334	176	517	147	1	255	354	58	3	30	21	28		253	150	29	257	1938
9942	125		1941	291	447	171	12	533	420	211	48	50	314	43		559	164	60	454	2134
9943	108		61	164	249	276	6	73	288	82	13	30	44	60		184	218	51	261	1497
9944	144		43	275	533	779	8	575	275	329	33	108	105	21		779	14	213	400	1846
9945	107		215	39	266	46	3	22	81	45	7	2	6	18		119	10	13	128	1421
9946	110		11742	286	475	227	18	129	278	129	17	23	33	65		309	119	50	346	2488
9947	123		406	0	0	0	0	77	64	143	5	0	10	102		120	15	98	46	683
9948	97		614	79	153	76	3	36	98	93	16	7	27	75		118	14	22	99	2095
9949	139		3	149	283	24	66	86	295	121	81	45	21	52		325	55	56	238	2262
9950	94		2331	281	501	469	9	325	335	130	10	14	48	61		429	99	52	433	1676
9951	76		11253	72	95	86	10	126	125	121	10	14	12	70		154	123	49	189	990
9952	97		149	29	139	73	2	137	208	103	0	16	11	60		82	48	14	71	1299
9953	129		26	45	96	79	4	128	88	188	29	50	21	73		152	166	37	170	741
9954	113		8376	145	230	168	15	70	197	116	24	16	58	58		291	255	34	241	1312
9957	96		1843	138	236	194	8	249	208	96	22	27	35	94		245	267	36	292	2093
9958	126		17	165	331	234	18	392	293	141	51	73	70	118		557	961	51	525	3175
9959	118		4486	37	156	57	4	148	143	108	10	23	21	34		92	83	24	43	972
9960	128		2765	139	238	186	5	211	208	100	6	20	31	26		200	112	47	112	1191
9961	60		5380	255	714	599	14	522	408	50	27	37	138	21		454	117	154	272	3886
9962	46		1022	4	27	31	0	13	28	46	2	0	5	27		4	3	9	30	561
9963	81		11368	98	436	53	4	46	207	131	9	14	17	52		102	31	13	134	1483
9964	85		2630	168	325	115	16	209	257	64	7	7	38	60		206	146	40	326	1653
9965	85		109	180	358	159	14	343	379	115	20	28	47	78		419	311	23	375	1632
9966	77		6870	197	415	98	2	268	288	118	29	11	31	33		465	155	25	238	4035
9967	110		35	92	215	209	12	185	197	125	7	25	45	25		181	23	15	154	1404
9968	74		118	115	282	135	0	147	300	138	8	9	33	46		181	83	11	127	1157
9969	76		4509	290	640	555	21	470	249	72	43	50	61	108		531	99	94	387	3522
9970	91		1220	84	271	89	2	143	167	58	12	12	20	29		139	63	48	104	876
9972	109		2372	205	268	126	13	192	235	111	22	12	50	76		295	107	39	252	1265
9973	64		1142	16	95	20	0	13	10	71	2	2	2	58		39	2	3	39	1023
9976	57		3195	186	331	108	9	249	205	182	50	62	79	137		314	83	22	207	2127
9979	115		3790	91	196	103	3	218	145	152	11	30	34	37		265	102	65	193	1555
9980	97		4911	278	291	80	54	207	281	155	55	15	70	54		481	310	116	698	1563
9981	36		69345	126	542	273	3	211	176	125	27	14	39	28		408	111	40	269	1064
9982	99		43560	132	348	275	8	337	252	80	11	20	56	48		382	91	90	283	1162
9983	80		277	367	520	288	37	94	292	62	38	16	97	106		587	400	101	489	2477
9984	105		35436	183	336	136	14	107	138	157	9	15	57	89		198	228	105	170	900
9985	33		6	0	41	31	0	34	128	428	9	0	0	32		38	19	0	33	1588
9987	86		36	133	201	165	41	305	198	183	7	4	43	103		153	35	27	187	875
9988	93		162	239	433	253	78	96	245	146	92	41	73	135		307	267	126	243	2857
9989	40		50911	118	183	183	20	288	263	150	20	18	80	157		329	137	128	250	905
9990	145		21	114	228	89	12	12	104	361	2	6	24	17		174	1	14	102	793
9991	57		24	20	52	36	3	15	41	58	0	31	3	26		28	24	8	39	1169
9992	115		61	320	657	374	110	124	433	118	124	19	119	121		508	74	107	508	4224
9993	94		856	137	254	257	49	206	228	107	37	7	40	72		176	89	74	221	2471
9995	120		107	84	289	53	1	166	157	63	7	12	25	31		115	10	16	117	978
9996	184		42	60	102	73	4	223	177	112	9	17	17	39		140	47	36	93	968
9997	82		52	264	389	55	11	370	368	91	27	41	59	32		453	486	0	400	1178
9998	141		164	117	187	147	0	199	179	105	13	16	33	46		193	114	0	197	1279
9999	115		3405	80	196	122	16	86	84	111	10	17	19	20		226	159	87	128	1476
10000	63		48569	371	409	318	4	169	228	79	10	21	39	77		430	173	9	306	1584
10001	26		4998	237	379	57	20	327	392	69	18	15	17	108		409	300	0	317	2524
10002	96		7738	181	257	134	16	62	174	93	24	13	15	38		211	118	34	232	2037
10006	63		6469	182	203	57	1	268	213	105	6	7	28	108		227	122	36	216	785
10008	120		1466	18	141	56	0	74	115	59	3	0	8	38		66	7	5	23	879
10009	137		5717	233	264	201	29	351	322	126	37	33	104	112		281	247	84	243	1202
10010	75		2234	147	242	104	14	59	198	163	36	41	44	136		405	352	97	299	1712
10011	158		7502	258	507	340	68	322	405	123	48	18	78	82		508	178	75	293	3398
10012	81		95	160	247	217	53	144	181	105	47	20	153	83		267	198	31	251	2423
10013	75		49	506	822	666	137	491	414	116	153	78	223	269		701	4	125	676	7623
10014	114		34308	208	434	201	48	229	220	97	47	10	181	62		215	5	41	304	1389
10015	99		543	170	278	274	62	417	445	192	56	40	65	83		474	395	111	272	2279
10016	79		794	201	491	382	2	387	230	137	12	30	32	80		219	74	11	196	1900
10017	106		5625	93	256	213	6	167	180	96	5	11	34	74		139	142	61	61	1158
10018	46		35	232	260	269	10	265	230	107	37	24	48	68		333	433	193	230	960
10019	204		160	110	155	82	17	231	195	228	10	18	16	79		138	127	33	101	1601
10020	117		2847	224	416	76	4	310	331	82	6	17	63	43		317	171	18	370	881
10021	94		281	201	311	185	0	330	203	204	12	89	17	60		196	105	0	213	1657
10022	91		98	112	268	250	1	247	161	245	12	13	38	86		177	38	0	125	1184
10023	118		7995	218	418	296	12	103	276	225	26	34	57	83		510	248	48	444	1517
10024	180		1381	225	719	771	42	709	493	209	20	111	76	25		525	371	47	405	2556
10026	190		386	247	345	169	39	72	215	61	52	34	49	83		624	322	7	706	935

## Sheet: AT5G60910
accession ID	AT5G60910		AT4G32280	AT5G62280	AT5G47370	AT4G38850	AT1G29430	AT3G03840	AT2G18010	AT5G18060	AT5G18050	AT5G18030	AT5G18080	AT5G18010	AT3G23030	AT5G18020	AT1G31580	AT1G29490
108	64		105	88	759	74	458	36	0	47	14	99	20	138	3643	34	43	0
139	16		2929	1317	4062	574	915	302	65	689	291	1342	562	788	6616	445	9	114
159	8		621	1123	1487	83	333	106	15	271	332	285	193	0	2438	179	2649	60
265	105		1215	1487	2691	257	423	119	44	284	207	391	499	32	4386	334	9	17
350	32		835	915	3419	250	850	269	74	538	330	939	587	99	5879	381	1978	52
351	7		812	1262	3205	149	685	109	38	283	324	641	533	36	3887	296	9	5
403	49		539	443	1722	240	757	185	66	310	54	414	271	63	3763	200	30	30
410	14		1214	1238	2445	90	203	43	63	211	129	152	187	11	6801	106	93	48
424	22		721	821	1914	35	177	22	23	152	67	69	132	6	5920	57	258	13
428	40		1910	1066	3174	57	204	41	32	239	126	123	97	69	7785	57	7170	10
506	10		692	942	3092	322	681	182	25	188	77	421	509	96	4851	195	15	33
630	7		2207	2437	5907	522	900	199	72	335	151	723	662	115	6183	263	3	82
687	4		1078	829	2310	494	794	312	35	253	108	650	731	123	4461	306	14	39
728	7		2980	2955	6217	452	1273	295	78	472	199	966	949	231	6305	448	26	172
763	94		49	133	1336	93	417	31	3	6	0	63	53	12	1945	58	131	8
768	69		822	610	1445	275	137	64	17	287	229	187	169	52	3606	155	1478	28
801	15		244	366	796	98	254	192	23	170	195	236	162	0	5119	159	47	0
870	34		1933	1304	2847	278	621	165	63	347	142	515	430	80	4423	166	159	87
915	60		933	965	2451	157	541	168	36	328	208	434	333	65	3546	375	14766	31
932	6		1150	1251	2602	39	84	40	42	126	50	102	167	8	4529	39	73	5
997	80		1535	338	916	99	200	98	6	415	304	210	303	9	3376	158	281	23
1002	24		441	140	543	173	499	178	15	400	278	276	273	45	3588	271	8457	13
1066	10		513	242	1477	193	664	182	26	464	254	336	370	34	3490	153	9806	15
1158	24		926	268	1391	119	223	133	14	203	113	139	166	30	3378	126	13920	40
1317	26		771	167	569	258	796	199	21	348	82	582	589	65	4047	283	7983	18
1435	39		156	748	973	57	123	32	8	35	65	107	84	52	3451	61	13	13
1684	1		1117	1708	3267	152	669	287	17	285	95	633	606	142	4599	322	23	17
1741	52		294	395	2011	214	529	197	9	109	39	384	387	90	3148	183	10	11
1829	16		570	994	2760	174	654	149	24	304	263	491	299	0	4266	293	414	14
1872	15		316	1533	3328	110	519	141	17	274	158	209	163	112	2957	190	103	4
1890	30		31	241	874	37	291	35	5	28	23	117	73	44	2497	103	27328	7
1925	11		123	958	2091	88	537	91	11	147	131	323	181	141	3245	315	145	1
1954	9		263	1110	2162	81	386	68	9	139	149	222	123	96	2123	158	1454	7
2016	5		92	839	1336	30	338	54	2	45	37	160	83	74	2727	130	175	2
2017	8		1244	1149	3024	119	578	183	17	141	73	415	406	80	3060	211	32	25
2031	5		455	3196	3093	54	332	58	3	81	37	164	183	38	2444	75	8	38
2171	20		343	800	2813	174	585	148	20	223	140	331	258	59	3933	169	46	24
2202	41		259	770	1831	101	452	108	8	123	126	348	189	139	3945	250	6942	4
2212	17		1262	1291	3519	238	773	201	37	233	128	516	460	107	5306	229	52	24
2276	26		492	771	4056	252	800	203	37	292	185	458	392	59	4975	243	50	20
2278	29		129	753	2230	97	516	62	6	36	13	143	159	29	2323	80	87	15
2317	197		1943	1455	2780	163	510	154	21	455	231	240	334	43	4425	216	256	29
2370	7		1495	1266	2832	266	848	195	67	404	161	761	519	116	5175	292	19	25
4779	73		1235	306	1496	176	377	90	27	364	231	403	366	40	3686	299	1420	1
4807	7		2248	1259	3549	276	608	342	81	481	215	920	678	154	4925	328	5	84
4826	31		1235	498	2780	356	472	291	33	384	227	716	560	76	4656	295	4424	28
4884	27		1725	1767	3671	76	329	97	26	120	60	208	220	37	6512	80	3206	42
4931	7		42	389	1752	103	398	40	8	61	26	123	67	23	3673	110	203	1
4939	17		437	507	2498	195	569	109	10	129	59	444	458	72	2388	197	186	1
4958	28		591	686	1994	164	532	100	32	177	144	255	309	54	3892	245	4574	24
5023	62		325	420	2225	246	535	101	12	140	41	369	495	69	2518	190	1336	4
5104	15		378	752	3324	183	565	220	25	132	137	259	384	14	4621	269	4674	22
5151	19		477	612	3102	329	571	216	63	319	261	486	580	64	5099	405	65	29
5210	10		148	691	1432	28	283	37	3	22	7	112	123	14	1983	52	2	4
5236	11		72	611	1859	110	330	63	1	47	14	128	155	25	4357	43	62	0
5276	13		82	197	815	17	96	29	2	41	4	52	49	24	4870	23	52	1
5279	18		630	880	3352	193	562	158	25	128	66	414	381	86	4607	181	1876	0
5349	16		619	1101	3755	162	362	83	52	306	185	262	321	22	2796	218	12	30
5353	51		389	92	770	71	144	64	11	72	38	125	197	12	2636	68	8918	0
5395	93		256	229	920	38	419	36	6	85	66	132	116	33	2574	101	8729	2
5486	27		936	1379	3006	182	546	162	40	265	232	310	363	12	3224	299	10259	23
5535	37		3523	1988	3816	411	495	222	109	503	270	895	874	136	4982	340	86	19
5577	80		669	103	966	131	185	43	6	118	44	180	222	34	1538	83	178	2
5644	145		897	420	1904	192	567	169	29	292	196	489	356	66	3220	239	69	45
5717	8		295	506	1388	64	403	95	2	259	126	424	287	94	1578	179	26	0
5718	11		1272	1338	2748	221	703	234	42	414	324	792	448	120	4654	353	25	43
5720	21		806	700	1805	70	139	150	15	185	132	175	289	28	8301	105	7435	2
5726	24		980	704	1608	58	267	117	10	103	46	304	289	42	8628	76	49	0
5741	23		2189	1295	2749	438	769	194	93	1700	1154	1859	932	220	5289	748	93	58
5748	65		932	594	1657	69	104	48	13	244	164	142	162	87	7837	94	3518	10
5768	46		327	182	1108	91	315	89	14	218	140	287	197	32	1857	215	240	0
5772	22		3610	1526	3580	267	547	308	118	874	924	1061	759	62	4266	429	11	73
5778	23		2354	3653	4658	224	792	145	92	501	525	816	381	237	6317	426	11910	99
5779	8		1767	2820	4454	363	838	150	125	353	144	769	563	126	6340	315	5620	74
5784	34		2524	1009	2783	246	663	171	23	382	202	757	721	129	3709	364	1020	187
5798	11		1268	1107	3229	273	526	135	41	199	77	600	518	120	3694	232	1192	5
5800	11		2164	1544	4642	491	626	333	92	309	147	897	668	144	4693	343	1158	65
5811	121		3100	1237	2996	273	311	125	68	574	400	559	438	86	4405	463	3193	69
5818	127		605	1070	1262	62	198	85	5	148	201	132	138	42	3021	177	18984	15
5822	4		3137	2621	2560	34	61	52	86	236	109	87	110	2	6136	43	16884	28
5831	10		1016	405	1619	175	406	60	16	267	249	158	156	30	3451	91	2354	28
5837	91		1507	1057	2063	231	578	175	38	803	573	647	433	251	4864	299	67	27
5860	31		352	475	1132	138	374	50	6	100	17	145	159	45	2181	92	374	12
5874	30		1925	1282	2634	74	74	23	43	50	12	61	79	14	9623	20	2049	14
5890	2		2155	2324	3620	72	85	54	49	129	76	79	91	28	8526	20	8	44
5893	65		332	526	893	133	169	54	16	154	119	165	94	41	1773	123	266	6
5907	10		1368	1046	1354	164	270	115	52	507	216	411	383	46	2957	346	15	15
5921	76		1066	550	814	154	289	82	21	191	153	215	107	68	2199	124	3037	5
5950	70		625	329	1020	111	211	51	15	241	143	230	204	26	2461	227	2426	3
5984	295		1875	901	1222	217	319	86	48	476	303	597	349	119	4979	268	62	11
5993	24		1492	777	1437	134	276	63	17	309	45	232	137	21	3716	107	459	5
6008	188		440	752	1196	82	234	58	16	195	116	252	145	58	2112	116	588	25
6009	27		544	374	911	131	457	211	26	351	309	367	370	29	2471	173	6230	12
6017	30		608	365	1117	234	415	217	16	152	41	335	318	31	2975	202	4262	7
6020	10		475	502	987	134	194	75	32	178	123	160	187	22	2585	149	207	4
6024	66		784	200	855	96	237	93	14	237	197	213	222	40	2816	165	784	4
6025	95		598	112	736	216	246	55	26	142	91	173	186	19	2361	159	5552	3
6038	38		367	293	707	62	95	24	9	172	81	120	164	9	2316	84	331	4
6041	53		519	562	1290	164	350	71	10	155	38	214	227	41	2371	91	55	11
6064	24		1433	2174	1025	148	207	213	89	425	548	525	369	149	3097	406	21	22
6086	9		1920	534	2491	240	319	164	17	457	378	408	507	77	4584	369	463	14
6097	17		371	98	546	117	206	63	8	157	78	169	159	9	2325	156	9269	12
6099	94		477	152	1984	159	257	61	23	80	26	309	219	30	6145	52	55	1
6106	86		558	147	888	179	275	78	9	319	207	258	247	43	3041	196	3706	6
6107	16		288	106	858	96	247	125	18	90	82	152	159	32	2524	136	3566	14
6108	84		764	203	1196	222	322	82	9	437	322	360	457	63	3752	358	5223	7
6111	40		755	71	904	187	329	82	11	158	43	442	446	60	2557	200	3652	32
6133	89		385	64	605	209	275	54	12	130	73	169	229	25	2455	182	27715	5
6137	81		347	99	1294	108	537	106	6	167	136	183	246	22	3295	246	115	23
6138	15		220	113	657	71	210	66	6	76	18	105	112	16	2646	46	120	4
6140	39		512	149	1053	73	151	47	14	165	111	160	199	19	2513	194	5493	22
6145	98		381	52	1255	177	192	88	24	99	25	263	229	26	2534	134	13704	11
6148	30		204	124	1119	150	239	98	51	279	138	246	224	27	2663	200	20615	12
6154	32		815	471	1462	296	399	79	34	182	217	301	307	50	3111	257	3585	12
6163	47		754	478	1547	242	346	50	30	128	133	299	244	38	3274	222	4766	5
6166	101		75	54	942	89	151	24	14	72	25	145	143	8	2404	130	12553	1
6169	13		292	307	1336	273	599	145	16	43	11	293	253	40	2947	169	3132	12
6171	40		52	92	1001	79	541	221	7	21	3	132	121	12	3598	67	10442	0
6174	21		90	273	780	64	268	152	6	16	9	81	97	11	2756	51	7304	1
6177	33		182	155	651	109	352	57	15	106	42	180	195	14	2672	135	8964	0
6194	17		572	461	1397	73	283	85	32	180	88	126	157	19	3666	84	172	3
6195	47		1484	1888	3002	100	357	48	21	123	29	289	237	49	3825	157	2490	6
6198	39		263	139	568	118	141	63	15	69	21	112	77	12	1894	39	769	6
6201	11		93	106	455	79	339	46	15	62	27	112	80	25	2604	48	322	1
6203	13		194	178	961	66	147	45	20	109	64	136	99	42	1914	82	141	2
6217	22		566	266	1172	64	100	60	16	63	8	117	141	17	3224	56	5454	2
6218	22		387	222	979	108	176	75	11	56	12	147	123	15	2281	80	4539	1
6220	25		1601	438	2698	129	211	65	44	555	318	260	344	31	4383	191	154	15
6240	37		435	196	568	142	116	41	8	124	60	120	115	24	1873	64	5767	2
6241	25		896	324	1265	141	171	42	34	238	152	207	225	67	2762	146	3050	0
6255	14		292	670	1487	181	235	85	128	629	575	569	518	30	2809	541	1258	16
6268	31		833	317	1477	199	767	115	34	616	358	470	440	27	5100	333	10633	0
6284	19		1220	936	1464	216	361	159	52	220	71	367	414	67	4206	207	2178	26
6296	16		1768	1281	1758	125	319	176	50	210	73	327	448	88	3278	181	3	40
6390	80		1221	469	1281	125	220	91	56	443	245	337	311	60	1945	177	5070	8
6424	59		1378	822	1819	80	115	61	27	96	61	152	126	22	2512	69	23	6
6434	611		990	741	1853	131	138	82	40	163	177	263	297	25	2591	195	3095	1
6445	183		545	187	830	119	287	51	5	71	18	188	105	13	2797	73	13843	4
6680	23		1204	797	2083	133	312	163	69	640	383	408	362	278	4199	322	35	24
6709	13		55	291	1094	7	197	37	1	43	26	104	74	0	1480	95	1	2
6744	625		330	46	1259	422	443	92	33	484	294	482	361	0	4239	383	100	1
6830	157		1109	555	3206	214	546	97	44	238	287	480	244	134	5519	285	1182	17
6900	7		485	429	1230	262	586	115	45	430	314	380	371	49	4139	273	3494	14
6906	140		626	924	1152	99	217	39	5	114	87	177	85	31	2948	109	22	4
6907	76		950	200	1147	196	401	111	7	388	285	382	350	29	4226	337	8592	5
6908	30		596	677	3798	362	519	145	75	271	178	620	421	6	4415	447	22	31
6909	209		170	1162	3214	53	246	25	5	46	193	94	157	20	3503	66	6047	31
6911	19		476	721	1058	35	89	35	11	56	10	67	89	16	6016	30	5134	7
6917	17		343	350	1610	240	406	152	20	116	29	336	305	31	3161	169	4735	16
6923	25		1383	1392	4891	493	831	153	66	210	98	622	621	125	5676	242	14	33
6933	7		827	581	2429	31	66	68	34	44	51	55	115	8	3081	44	296	2
6937	42		534	351	1256	81	131	103	24	91	47	110	140	11	2699	95	19	23
6939	104		636	528	1930	68	328	63	18	177	90	284	193	38	3340	182	1259	6
6943	58		1559	866	2524	203	603	123	30	660	374	314	312	43	3827	267	1726	9
6944	37		1133	2896	3079	210	537	230	72	258	116	547	399	68	4841	282	437	41
6957	31		1267	746	1325	184	321	120	51	265	253	374	347	42	2508	206	15	17
6960	122		722	742	1663	240	343	84	22	387	451	459	362	230	2483	501	8824	22
6966	17		2157	2000	3944	304	804	241	47	405	269	554	350	0	6225	414	622	18
6970	81		781	97	1326	406	677	341	46	243	98	570	632	67	5677	255	2318	4
6971	35		1868	693	2502	289	661	343	62	741	489	619	740	27	6424	534	9	53
6973	14		772	804	1355	90	297	49	7	274	201	181	230	18	4289	157	61	14
6974	4		607	936	1783	161	413	116	61	274	193	278	208	86	3939	145	1033	36
6976	32		285	390	1124	29	295	70	11	162	70	112	128	10	3571	76	9449	4
6979	344		465	495	2897	262	495	230	93	259	79	995	844	105	6542	378	40	19
6989	76		1038	361	2013	234	726	265	42	198	225	420	363	35	3642	308	83	8
6992	95		738	448	913	107	206	111	28	218	224	243	179	14	2420	106	6677	14
7013	47		1646	2545	3936	192	524	220	31	558	477	459	317	85	3779	221	217	39
7028	83		253	2338	2585	163	658	84	3	178	66	238	184	24	2811	198	4664	5
7033	8		1463	2019	4871	404	1021	170	73	408	193	767	598	122	6666	305	27	36
7058	29		289	300	806	18	79	52	5	90	74	92	98	12	1635	69	12439	4
7067	984		500	201	946	79	196	75	9	129	36	150	245	30	2664	94	386	3
7094	33		396	727	1783	119	611	67	22	199	135	346	244	99	2987	270	1028	2
7102	7		672	664	2428	123	272	99	19	71	19	236	211	31	3597	126	2516	4
7103	168		358	496	2425	172	437	75	10	267	178	382	276	65	5276	144	99	3
7106	54		236	280	1717	84	337	83	9	100	57	105	100	51	2042	83	2474	5
7107	99		465	153	1395	356	906	183	20	356	160	656	392	41	4899	275	8840	16
7111	16		376	751	1250	72	376	51	4	227	176	186	193	52	3577	111	6764	12
7119	93		343	323	1232	70	126	113	7	164	133	192	133	4	1776	67	3115	8
7161	126		97	262	891	246	338	42	16	80	26	253	189	20	2671	172	4584	8
7164	55		228	158	1096	112	303	107	10	124	79	187	265	49	3888	90	14679	5
7165	19		424	610	1561	235	681	289	19	317	235	338	329	130	3927	327	10083	28
7167	44		1094	1970	2531	116	386	306	66	364	253	442	407	85	4858	387	650	51
7169	20		477	790	1113	271	411	75	18	86	8	198	140	16	2920	120	292	11
7186	306		67	57	1230	51	218	34	13	63	7	61	26	0	5043	18	2974	3
7202	145		246	909	1553	53	162	87	6	79	31	147	143	55	1856	59	7025	23
7218	42		305	369	1040	131	297	55	15	120	10	164	111	14	2691	70	8862	0
7231	31		720	1310	2734	213	404	74	19	466	280	584	378	74	3449	321	735	17
7244	17		421	869	2778	139	647	94	10	127	115	171	111	24	3184	77	29	41
7248	9		618	403	1287	182	317	57	10	173	54	325	256	27	3831	143	108	6
7250	229		193	309	1796	93	643	87	15	154	21	323	397	49	2567	164	73	5
7263	122		537	154	620	143	185	99	14	184	71	255	190	36	1750	124	34178	9
7282	63		278	558	1894	45	138	35	6	70	60	136	55	62	2072	60	1759	6
7288	57		550	379	1578	65	423	75	16	178	95	268	249	102	3987	132	53	11
7296	78		90	655	1404	32	140	59	2	197	37	60	80	6	1921	75	5	7
7308	135		281	78	909	172	316	51	20	100	39	193	191	41	3527	96	141	23
7316	23		766	514	1515	277	397	118	55	307	174	354	395	51	3633	336	266	2
7320	51		1545	765	2831	199	390	76	38	697	503	340	350	58	2856	334	20221	3
7322	17		1378	1087	1913	32	26	35	23	49	17	38	46	11	8384	21	665	47
7327	110		1485	657	2231	204	398	108	60	155	72	295	237	15	4483	202	2773	30
7328	24		2493	813	3030	82	42	24	36	207	39	43	131	5	7907	25	29	9
7330	74		943	593	1310	75	199	59	32	400	295	385	301	1	1742	261	842	17
7346	50		1755	3155	2272	100	307	102	45	370	277	416	360	53	4025	189	948	11
7350	119		827	289	1326	90	222	39	15	849	371	295	341	22	2521	212	5307	5
7353	9		1485	1258	1001	132	365	92	65	256	90	424	344	69	4052	216	3300	4
7354	15		2193	792	2667	394	724	184	106	644	361	876	746	100	5216	464	5956	22
7355	20		663	122	909	258	353	110	35	657	282	276	410	27	2751	278	820	9
7372	27		2050	1503	2306	51	154	63	56	163	76	102	106	30	5940	57	2166	26
7373	65		782	377	1343	96	179	73	12	140	105	224	180	0	4166	145	15	27
7377	27		1403	227	1421	334	428	223	25	218	149	334	276	60	5302	260	89	11
7384	15		1248	182	1058	113	367	171	16	310	392	300	326	55	3607	225	675	2
7396	42		592	704	1466	117	187	45	25	232	87	91	80	42	4726	75	5810	16
7404	53		1451	863	1975	297	531	227	99	320	121	698	607	83	5692	314	62	9
7413	299		774	279	1038	134	174	64	18	194	52	326	218	22	3715	92	4644	10
7418	6		1432	1501	2001	164	161	84	51	190	159	301	187	0	9352	172	21	0
7424	26		1624	3396	2574	69	236	137	95	298	117	391	252	32	3954	159	1893	44
7427	32		1784	581	3689	204	307	168	53	206	249	272	305	9	4074	234	25	13
7458	60		1636	562	1640	67	359	113	31	302	174	203	223	19	3322	186	416	11
7461	37		198	208	571	67	323	76	15	92	64	215	170	41	2077	198	22819	5
7477	35		4383	1921	4392	61	133	32	35	233	103	122	98	41	8740	36	33	88
7515	15		1854	1085	2253	325	583	117	33	297	80	444	427	62	4874	218	57	7
7517	42		375	303	1209	111	277	84	45	286	101	239	317	33	3439	215	7718	7
7521	6		490	668	1231	83	134	53	84	168	167	180	202	10	2283	82	30	11
7717	17		2460	1277	5380	641	986	485	110	1599	738	1024	755	495	7291	442	29	158
7917	16		1620	2462	3037	36	97	81	65	159	167	221	156	58	3784	108	9664	18
8077	63		927	1067	4463	338	812	260	37	327	149	649	725	63	4271	370	166	23
8132	34		542	1239	1675	181	547	95	24	136	92	302	208	82	3912	150	1206	44
8231	7		419	485	1603	160	470	98	14	161	33	256	202	40	3435	140	91	23
8233	20		1330	1718	1584	90	361	89	11	125	53	235	241	37	3068	113	99	25
8234	8		1241	1578	4759	512	737	199	98	455	306	566	599	103	5272	268	1583	76
8235	18		562	453	735	71	172	42	12	190	95	179	122	53	3842	97	1414	1
8236	19		375	711	986	65	404	138	33	254	138	311	147	75	2549	139	9	24
8238	16		1709	2204	5682	447	580	281	202	291	111	715	601	108	6475	245	952	252
8239	115		1879	3428	2951	173	383	171	67	412	185	489	460	22	4040	187	10	29
8244	7		3176	1628	5884	517	933	158	142	432	164	680	656	120	6550	301	867	115
8246	24		1116	1101	3035	376	490	103	78	524	306	369	392	35	3818	336	66	131
8247	24		478	238	1013	132	228	78	19	118	106	179	218	40	2900	185	5691	17
8259	31		508	567	1590	128	341	142	81	229	275	360	227	19	2650	175	7689	19
8264	7		1594	1687	2130	49	62	51	24	40	11	43	68	14	7790	19	10	11
8266	25		261	452	1976	98	559	117	37	221	178	432	306	131	3106	309	3	13
8275	37		673	1309	896	119	160	104	50	294	238	140	203	0	1962	167	132	5
8284	30		192	318	796	65	201	51	16	135	44	211	97	25	2404	76	14	0
8290	87		899	327	1153	113	235	97	9	151	90	218	227	37	2927	104	174	13
8297	38		260	482	1686	92	309	172	22	72	28	225	206	37	3655	89	43	15
8325	117		258	180	1565	193	343	86	26	96	29	158	176	31	2042	73	4284	5
8334	69		297	174	1107	29	210	63	6	83	26	106	68	12	3135	38	18481	0
8337	30		1386	80	1474	207	317	120	18	653	439	437	312	32	3163	389	5941	47
8343	26		1311	974	2792	138	420	75	21	202	53	349	272	38	3168	212	26	34
8351	59		483	289	1010	133	366	63	6	180	114	200	217	35	2249	121	14608	5
8353	287		124	175	1561	248	703	94	3	96	27	250	302	39	4811	178	1864	33
8357	89		1788	1068	1473	152	210	95	19	289	197	230	307	17	3676	190	49	4
8365	396		500	331	1018	109	265	50	21	273	102	131	168	29	2328	117	2057	4
8366	43		1000	760	1988	142	459	180	30	339	274	685	309	201	3992	442	15	16
8378	26		3002	1165	2088	54	96	28	59	93	27	114	178	31	7121	32	258	20
8386	65		372	614	824	74	283	49	7	154	66	135	87	43	2939	66	11703	15
8419	20		1160	1622	2684	297	372	123	77	198	128	278	182	1	5444	162	74	48
8424	5		355	560	2858	294	362	90	59	99	98	271	265	78	4411	194	19	43
8428	36		172	510	636	65	257	33	6	59	30	173	123	14	1287	133	24521	2
8430	14		135	376	759	48	228	53	10	51	8	124	97	24	2167	68	33	0
8472	160		1045	2475	2537	53	157	46	13	275	283	226	248	76	3865	130	5426	4
8584	74		157	35	1015	100	187	45	6	93	19	103	179	34	2347	40	64	1
9067	11		517	665	3064	368	557	245	66	2	3	365	404	40	3857	155	9979	73
9075	9		2070	2031	5579	424	894	322	171	3	11	563	573	92	6940	211	32	42
9078	9		813	1203	3389	416	604	279	94	1	4	395	420	73	4927	142	32354	24
9079	22		325	321	2597	222	411	217	23	5	4	223	294	40	2956	148	28691	16
9081	14		1230	2371	7105	508	703	300	117	2	14	659	556	108	6702	219	15931	151
9084	24		1463	671	3463	453	567	312	95	769	398	574	594	41	8111	383	19653	65
9085	23		1498	671	3840	315	495	286	76	672	341	492	543	44	7620	292	17886	50
9089	23		1387	912	3541	376	616	193	76	1	6	531	531	78	7221	187	22549	54
9091	25		610	735	2650	310	387	164	60	2	8	254	264	36	4167	115	31501	42
9095	9		1088	595	2674	177	288	88	56	1	7	302	296	39	4816	83	37695	33
9099	22		482	236	1616	266	390	194	21	1	4	289	354	50	3357	124	114	39
9100	12		2023	1293	2321	88	60	27	21	229	79	60	83	9	10699	32	22425	13
9102	19		1417	808	1890	181	244	72	50	257	117	149	198	21	6039	107	97	31
9103	19		727	1056	2261	167	270	56	55	0	1	173	200	36	4615	89	8255	71
9104	13		1360	490	1447	63	95	63	17	176	85	105	129	18	9625	69	20141	9
9105	8		823	744	2301	134	227	150	21	222	99	135	146	26	4411	139	42340	20
9106	22		639	927	3180	277	403	170	16	1	3	292	316	68	4420	137	76679	45
9111	17		985	515	1977	157	283	77	60	233	108	141	190	16	4712	120	25001	32
9113	27		1843	1470	3117	260	450	131	57	0	3	445	382	56	6115	143	62	33
9114	62		336	744	2973	269	313	102	27	388	141	184	252	16	3921	136	7330	26
9115	19		346	672	1983	136	274	75	21	293	88	118	173	10	3776	91	9188	19
9121	7		918	1428	2836	216	347	114	96	275	208	385	238	113	6667	199	35307	125
9125	54		1491	1355	2528	233	300	110	67	250	232	365	238	143	6101	197	41616	107
9128	7		2064	1694	3525	340	489	215	116	399	371	659	401	205	8639	345	29376	181
9130	15		1350	2000	3166	338	460	248	140	420	335	513	446	181	5879	348	35887	170
9131	12		1184	1706	3248	262	489	153	65	348	303	462	350	143	4250	289	29552	154
9133	8		1752	2290	4723	426	671	222	120	416	412	708	546	147	5739	457	32066	153
9134	19		1873	1870	3735	340	489	164	129	355	364	586	361	160	5392	346	18873	177
9298	31		722	643	2555	251	564	131	14	127	48	417	416	74	3286	169	2965	14
9312	3		1456	1683	5352	281	804	198	39	522	307	509	535	64	4995	484	22	20
9314	34		1630	1480	3263	247	450	98	56	242	107	441	437	80	3771	134	189	13
9321	27		553	234	1017	109	307	131	12	51	17	233	229	21	2771	190	3224	4
9386	59		254	74	326	239	249	124	20	226	89	165	185	18	3292	145	18941	6
9388	140		452	223	678	155	224	107	12	61	23	200	215	15	2683	94	243	2
9404	11		283	329	747	105	162	64	11	90	67	122	135	30	2204	105	6132	12
9405	14		430	409	982	106	223	86	14	106	84	156	211	29	2732	129	7501	18
9408	5		193	250	626	55	152	20	10	162	60	81	105	8	2131	37	3222	5
9409	19		446	256	726	96	230	51	7	209	114	88	108	38	2127	68	3167	9
9421	52		309	142	766	217	97	56	16	114	98	174	60	19	4521	36	206	0
9433	42		446	209	1307	158	272	106	20	198	133	229	141	42	2668	167	42	8
9451	26		381	347	1048	97	165	38	9	203	84	60	77	2	3000	64	5054	12
9503	48		1458	202	1580	252	441	123	12	223	142	267	284	26	2730	273	138	14
9506	28		1905	1088	1759	154	441	141	51	180	64	337	329	26	5235	142	41527	8
9507	171		109	60	1179	198	220	76	22	258	130	355	368	16	4813	116	10734	7
9508	35		3173	1532	3472	347	824	253	32	785	780	632	644	97	6136	300	514	62
9509	11		822	1303	2480	130	634	73	31	217	63	287	407	63	4952	114	1130	31
9510	11		510	545	1472	110	377	53	17	0	0	205	192	62	3631	163	26	0
9511	63		609	499	1612	223	467	82	28	208	112	228	337	61	5751	213	3855	15
9512	35		841	940	1563	164	357	48	10	154	95	120	191	13	4616	93	4834	0
9513	27		506	456	1739	131	351	77	20	15	3	273	208	98	3488	159	3505	39
9514	20		629	169	1519	239	437	45	9	0	0	284	282	149	3822	135	3759	2
9515	14		698	390	1499	252	320	63	45	90	78	125	211	18	5474	161	4302	5
9516	14		585	353	1256	85	291	39	29	65	15	195	279	42	4084	105	11	5
9517	146		91	144	1146	81	307	38	8	48	11	151	199	20	2471	54	3110	0
9518	3		775	356	1579	209	498	86	99	124	75	562	603	66	4049	359	3793	14
9519	24		1941	163	2755	497	562	174	103	515	247	454	641	127	6773	265	182	55
9520	36		612	180	1880	326	344	171	35	286	242	331	452	131	4751	258	69	44
9521	33		276	52	787	154	366	109	14	70	23	267	263	40	3702	127	545	7
9522	9		402	503	1709	204	432	87	43	475	246	214	374	63	4642	146	9	1
9523	25		871	530	1239	177	239	106	23	47	68	265	414	28	4418	151	111	10
9524	13		1963	500	2268	382	515	208	51	234	143	472	608	62	7800	176	37077	29
9525	21		1008	895	2541	217	343	360	83	204	110	417	441	25	7093	161	21	14
9526	8		421	99	992	299	569	90	21	145	93	178	213	19	3743	181	54	6
9527	25		274	215	909	174	370	112	8	281	196	268	375	92	4292	185	143	6
9529	55		1091	560	2154	224	259	92	79	378	94	372	503	51	3265	154	7687	1
9530	26		752	67	740	144	106	51	21	2	0	197	332	13	1989	183	141	2
9531	39		202	67	822	422	297	104	16	4	0	530	481	40	2986	684	45	0
9532	16		487	128	1215	80	198	70	3	33	3	354	235	43	4840	169	101	0
9533	22		396	906	952	149	407	117	30	27	3	272	192	39	3394	128	3257	12
9534	29		341	114	907	96	208	64	17	23	16	91	120	8	4480	28	6082	2
9535	72		982	162	1040	232	284	136	12	162	101	307	437	45	4819	126	58058	3
9537	41		582	382	2121	212	385	76	21	653	498	298	345	57	4061	268	100	4
9538	14		1205	726	2107	121	345	128	31	136	115	245	238	43	4321	103	26	38
9540	34		792	706	1262	147	242	187	14	226	239	165	296	43	5048	239	9	7
9541	21		689	408	955	147	293	100	5	722	599	317	440	29	3958	258	2307	8
9542	12		283	703	1071	91	337	85	35	258	162	266	198	39	3793	126	1406	13
9543	22		805	1622	1371	80	195	93	13	38	8	216	264	48	5559	142	2398	5
9544	18		353	103	970	105	187	58	17	227	135	108	212	21	2706	196	12441	33
9545	25		206	885	957	83	350	84	12	18	0	177	153	52	3546	89	5851	6
9546	35		29	3	1001	194	307	91	10	145	30	108	207	9	3290	153	140	1
9547	33		240	59	1487	227	384	89	18	148	32	239	228	7	5363	84	41	2
9548	17		323	227	1210	139	549	196	10	3	14	255	303	30	6110	135	15	1
9549	15		238	479	1541	178	894	194	23	15	24	259	41	21	4653	163	3154	27
9550	55		737	370	1135	95	302	73	41	70	7	99	116	9	3547	57	7107	1
9551	13		113	76	679	87	219	68	8	51	24	126	152	49	2793	106	17	3
9552	9		241	430	959	88	191	94	16	151	119	150	212	61	4096	91	43	25
9553	23		816	891	2038	48	202	69	14	60	32	255	234	37	4591	71	112	1
9554	16		820	662	886	238	376	108	12	43	4	371	372	103	4293	204	1515	25
9556	71		688	133	1003	230	255	88	33	157	108	183	213	13	3837	70	272	3
9557	11		950	438	1205	206	329	104	19	157	31	266	253	47	3893	144	52	0
9558	26		2124	702	2025	226	442	267	22	224	146	330	341	61	5672	128	16	31
9559	34		955	141	1174	243	509	166	51	108	44	316	424	44	5451	188	76	0
9560	13		1978	1316	2611	332	414	142	39	270	302	243	337	64	7015	246	86	9
9561	20		431	75	770	265	323	185	17	273	261	342	654	119	4230	225	5224	12
9562	23		2692	3161	4341	341	486	369	62	589	725	444	763	95	6985	416	10	13
9563	29		465	401	1140	104	282	127	6	184	174	381	341	132	3649	407	69	2
9564	18		622	379	2069	363	548	163	59	341	115	566	381	43	4196	284	3731	18
9565	16		1919	1628	1788	213	439	151	85	174	89	344	407	85	4709	171	6675	46
9566	30		1032	272	1763	282	613	210	36	164	188	361	452	70	4739	375	4746	9
9567	27		1204	382	2859	202	491	309	34	280	62	484	428	74	4366	178	3580	11
9568	21		2185	974	3647	386	573	165	107	511	183	501	722	51	5820	215	26384	32
9569	16		1296	1086	1890	164	306	148	55	183	89	289	381	75	4324	114	3852	27
9570	31		296	336	1179	229	356	174	30	134	34	273	339	57	5078	111	48	5
9572	19		984	1121	2511	363	485	265	39	395	138	549	687	103	6082	206	78	13
9573	48		416	57	1209	148	170	88	9	122	44	222	249	24	2798	114	140	4
9574	45		428	196	2478	369	798	95	52	52	21	493	506	61	7058	219	2	17
9575	30		116	60	2013	164	440	90	29	156	32	313	351	30	4427	152	72	20
9576	15		215	113	1971	243	374	204	41	219	87	329	503	96	4406	176	25211	5
9577	17		444	190	1468	159	397	143	39	104	73	283	307	30	5185	108	28670	2
9578	57		216	41	1606	157	472	132	16	118	33	283	180	64	4098	145	39	12
9579	22		375	65	1160	198	439	117	35	65	39	206	317	30	4981	129	2478	4
9580	37		373	113	1192	149	387	162	17	0	0	291	192	101	5176	259	119	3
9581	36		308	25	1140	181	437	140	16	49	9	197	244	22	7184	83	15675	0
9582	12		671	606	2554	227	481	173	41	177	67	333	305	44	5984	135	13	10
9583	20		866	499	2599	215	456	99	47	1	19	220	209	122	3235	113	3107	1
9584	10		921	358	2192	272	413	145	35	496	470	474	627	70	4901	243	7082	52
9585	288		150	132	2894	373	482	140	66	110	84	484	552	77	4824	209	2751	14
9586	61		611	208	953	218	462	144	25	154	47	395	301	56	4039	126	64	3
9587	54		731	226	1473	305	503	203	0	213	49	352	355	12	5222	190	83	23
9588	13		245	437	2160	285	320	93	44	145	77	434	336	29	3358	199	21960	1
9590	143		91	22	1038	301	134	86	10	37	16	176	183	9	2259	65	95	1
9591	13		832	1011	3138	164	283	77	34	199	96	345	333	60	4038	142	39	24
9592	14		673	708	1583	274	526	90	92	187	77	335	461	20	4418	146	17955	23
9593	33		507	137	1330	120	207	87	16	253	184	279	369	106	4038	261	16291	12
9594	12		1004	645	1106	198	377	161	24	136	141	207	334	26	4595	252	29	5
9595	8		740	166	1265	265	450	144	47	37	5	387	427	146	6729	220	16088	11
9596	16		1861	1122	1908	265	524	123	28	286	126	512	691	119	5543	241	8212	90
9597	60		461	218	1208	339	366	130	12	297	179	404	442	49	4904	240	350	10
9598	9		475	232	1538	237	774	87	16	267	162	307	318	160	4478	457	1317	26
9599	20		245	181	1363	153	320	129	4	168	95	204	235	0	4349	127	77	1
9600	18		637	779	1391	131	348	90	49	371	338	566	242	158	2723	272	107	26
9601	11		1176	203	1772	158	296	138	53	221	122	184	233	28	4832	170	401	4
9602	9		2994	2558	3550	265	439	205	113	500	433	583	523	141	6155	275	42	90
9606	14		1224	751	1037	187	401	115	25	394	123	486	525	90	2885	265	866	25
9607	33		886	883	1290	129	270	104	45	185	173	264	198	61	2973	194	9022	6
9608	55		1031	488	822	203	193	69	16	218	187	435	315	98	2576	329	18445	9
9609	91		1513	400	1660	114	254	83	21	269	268	347	232	86	2823	223	174	15
9610	15		1464	856	3648	102	389	78	32	426	399	416	218	109	3221	303	1223	23
9611	5		560	584	1026	195	539	236	30	286	231	460	437	114	3185	511	4894	8
9612	30		1359	759	1335	233	363	122	26	255	281	359	254	173	2432	332	9930	21
9613	103		897	316	1308	108	175	38	13	168	77	151	165	23	2654	98	907	3
9615	26		238	758	1302	92	353	67	8	110	78	174	109	42	2568	141	7275	13
9616	63		289	429	1536	196	385	85	20	217	180	467	283	94	2905	374	12838	17
9617	65		318	264	1119	190	313	70	35	204	145	448	234	61	1822	393	17489	13
9619	39		634	219	1277	260	316	119	24	201	185	326	294	39	3432	224	274	11
9620	31		642	276	1297	246	317	150	26	273	193	363	340	116	3336	272	255	18
9621	42		1013	405	1150	209	297	143	28	187	197	399	350	185	3902	328	245	24
9622	48		1196	1059	1384	122	404	94	13	358	273	420	257	52	3679	269	17	6
9623	116		72	127	713	20	201	68	8	120	57	162	145	47	1716	123	7	4
9624	89		573	81	484	152	120	85	11	179	132	221	207	80	1888	188	31519	8
9626	16		627	446	1430	149	291	76	16	315	295	326	200	32	2837	132	6008	36
9627	39		1330	912	1782	257	260	101	38	340	319	447	365	112	4415	338	126	43
9628	18		476	392	1139	77	306	50	10	296	172	293	112	120	2405	124	73	33
9629	92		521	149	668	213	360	77	13	433	202	360	201	150	3461	179	12968	21
9630	19		177	89	562	58	278	80	1	109	39	107	132	70	2428	84	204	4
9631	37		245	90	558	167	156	37	8	189	160	226	239	35	2209	185	4592	19
9632	98		553	146	852	143	177	26	4	191	127	157	101	12	2030	88	8785	5
9633	61		901	142	938	205	228	112	25	194	161	316	245	83	2859	243	227	8
9634	71		2251	765	2232	120	257	42	18	276	316	375	342	24	3914	253	122	7
9636	52		631	209	583	118	138	50	12	120	125	163	167	34	2421	136	10069	2
9637	39		696	577	962	118	153	52	28	140	150	199	164	64	3635	181	596	16
9638	31		300	159	523	146	156	68	15	99	88	229	170	53	1675	269	65	3
9639	59		555	558	1002	175	196	79	75	323	394	408	390	106	3635	336	43	3
9640	30		696	509	834	207	306	78	21	151	115	442	296	69	2071	391	39	3
9642	30		562	375	810	228	213	96	40	226	240	365	317	64	2421	312	57	5
9644	75		525	184	806	158	206	51	18	217	112	219	222	34	3239	200	5983	1
9645	20		555	452	1321	175	359	86	16	532	333	430	293	23	2035	446	3123	2
9646	33		179	395	1824	142	285	120	11	425	180	430	278	29	3519	281	8016	10
9647	8		1385	1281	1257	231	367	178	34	361	118	453	350	39	4528	191	4280	34
9648	51		1075	709	1143	223	352	121	29	457	310	379	347	63	2863	299	6200	12
9649	21		2093	1945	3217	63	377	102	131	524	510	393	377	37	4105	310	4550	39
9650	39		960	389	962	49	129	69	6	131	81	186	160	52	2699	81	624	9
9651	39		213	158	496	73	118	38	2	134	87	137	107	54	2616	118	8809	4
9652	90		822	190	1468	131	197	111	17	133	79	161	199	29	3724	151	100	2
9653	36		1596	666	1637	164	391	95	14	150	36	226	316	55	2837	97	46	12
9654	16		484	639	1543	239	451	162	27	438	306	841	497	1	2224	760	47	1
9655	21		2052	1080	2751	225	359	131	44	501	411	387	402	48	4589	302	10008	35
9656	12		1531	562	3364	190	371	177	27	514	485	361	441	60	4518	350	105	23
9658	18		1518	1249	1367	234	382	221	29	429	272	367	392	77	4257	317	51	12
9659	17		835	425	843	168	334	155	42	411	193	284	453	37	2863	280	3671	11
9660	156		1514	822	3160	258	513	149	28	370	238	288	341	12	5410	191	837	14
9661	32		586	325	889	107	259	166	6	189	127	213	287	55	3313	160	7	5
9662	61		834	396	1054	88	261	91	16	265	125	168	103	28	3201	80	83	7
9663	570		12	234	938	5	86	3	0	28	9	16	11	7	2011	28	9251	0
9665	36		75	229	684	143	266	68	20	169	56	228	122	33	1191	145	1285	1
9666	45		929	567	2262	194	324	142	26	328	246	513	415	33	3605	247	2593	14
9668	39		138	434	765	143	313	129	17	128	49	240	148	23	1880	218	1901	1
9669	44		608	488	1199	73	231	42	3	160	61	143	133	8	2078	57	8420	12
9673	36		758	576	813	78	106	44	14	191	108	93	110	16	1654	46	55	5
9678	72		1940	480	1569	172	279	126	25	245	153	285	213	23	2201	150	134	14
9679	8		475	616	913	131	325	98	35	98	46	308	246	65	1807	146	1102	3
9680	14		699	883	1025	152	349	98	37	153	50	393	305	82	2181	216	1010	4
9681	14		331	535	922	148	358	92	32	122	25	332	264	68	1613	175	1847	1
9682	29		485	173	879	84	109	71	6	69	50	124	130	34	1816	70	10964	4
9683	22		386	456	806	113	315	91	20	92	25	317	215	58	1806	150	1167	5
9684	22		619	757	1941	157	566	116	21	525	239	307	127	67	3095	247	10	31
9690	22		596	216	701	134	294	117	15	151	56	281	291	31	3761	83	4818	10
9693	33		396	324	685	161	242	72	19	179	56	210	224	27	2333	128	508	4
9696	47		606	214	1620	120	253	65	14	77	22	225	256	20	4205	94	5496	4
9697	51		445	421	725	189	251	69	17	228	57	337	246	60	2313	168	24866	21
9698	19		715	219	748	145	176	265	30	404	288	358	300	2	3415	291	13506	21
9699	8		883	723	2301	257	486	109	42	520	427	354	262	42	2874	224	5527	20
9701	19		375	427	1233	109	320	29	27	155	104	280	206	30	2594	148	193	15
9702	21		435	850	1592	276	369	135	22	366	160	293	286	8	2689	267	58	8
9703	12		1082	965	1331	205	240	87	34	467	232	316	398	46	2929	330	7	13
9704	42		1535	529	3435	265	550	215	65	436	148	433	513	57	4335	248	366	24
9705	18		2116	678	1439	100	148	80	11	254	289	238	226	41	2508	189	30	19
9706	9		543	1424	1704	243	623	126	45	173	155	318	252	51	5182	271	169	24
9707	22		720	409	1067	116	176	104	15	114	61	165	216	61	2350	78	142	21
9708	233		33	308	1275	31	54	18	3	18	5	38	19	4	5324	15	102	1
9709	74		505	278	1055	218	359	60	20	251	66	365	298	44	3337	124	61	0
9710	23		1281	178	1735	201	296	113	14	363	188	266	263	45	4720	226	67	11
9711	56		72	125	1097	51	226	35	2	101	42	82	68	12	2040	62	14562	6
9712	20		1029	886	1083	164	366	148	24	498	252	442	421	54	2649	414	23	5
9713	59		2926	948	1954	223	339	87	17	505	238	359	424	57	4396	294	58	13
9714	34		886	212	1066	111	265	56	13	107	34	218	184	61	2763	94	1495	7
9717	46		424	600	1292	75	164	58	9	254	119	129	161	19	4006	121	70	4
9719	25		1464	974	1477	189	287	132	72	247	100	443	331	152	4323	218	29	43
9720	28		865	148	943	211	158	73	26	176	92	408	340	64	2320	176	1296	5
9721	39		1394	416	2730	168	368	89	15	340	150	312	269	40	3428	265	348	5
9722	41		133	98	768	25	127	62	5	141	58	82	96	3	3647	72	2671	0
9723	12		625	553	913	291	397	151	7	141	83	447	321	11	1981	361	1124	5
9725	27		79	233	824	118	239	61	6	77	23	162	141	31	3172	123	22	8
9726	36		743	1064	1713	228	351	138	34	284	137	321	309	66	2722	235	10906	8
9727	23		929	551	1326	250	427	194	75	333	104	611	578	115	3092	482	1333	14
9728	18		1333	687	1027	146	274	101	57	381	217	332	328	73	3628	292	36	28
9729	11		1623	718	2448	269	476	253	25	608	475	562	490	39	4217	396	17	19
9730	68		133	125	806	33	71	26	11	46	35	80	92	3	1819	49	18083	2
9731	43		413	353	964	115	233	72	13	258	132	224	138	95	2707	213	67	2
9732	27		372	257	625	75	99	44	8	109	65	82	97	11	2608	86	10557	2
9733	38		954	570	1112	185	292	80	35	162	139	303	157	128	3725	249	318	6
9734	31		371	455	1182	118	421	170	6	156	68	340	294	52	3575	126	1990	1
9735	19		592	482	1387	123	179	88	10	136	125	207	192	14	2148	121	4047	5
9736	10		201	283	1366	224	252	108	40	209	31	342	348	63	2404	128	185	4
9737	27		1640	1092	1901	268	327	142	78	602	443	678	591	98	3924	538	1558	35
9738	46		1093	620	1441	120	262	94	40	173	52	303	324	39	3375	110	239	2
9739	60		642	1048	1457	272	472	136	63	359	116	566	536	82	3135	266	289	3
9741	11		416	297	861	104	192	60	13	236	141	159	95	45	2621	107	6270	10
9742	23		828	1112	1283	270	491	114	54	723	277	495	333	95	2694	466	62101	10
9743	21		93	105	995	26	161	4	4	138	52	102	113	16	3459	79	12	2
9744	56		295	415	783	152	465	74	17	113	22	332	354	45	2052	176	495	3
9745	12		915	1071	1002	263	253	97	35	269	203	365	244	101	2389	290	7093	26
9746	32		1403	523	1310	80	218	61	18	279	292	231	181	27	2567	99	1609	32
9747	11		1300	1949	1839	217	355	99	33	721	433	550	455	97	4441	420	1515	21
9748	40		1370	1025	1078	192	310	155	34	462	404	506	541	147	2670	301	74	17
9749	9		1419	822	1645	257	422	134	137	536	435	590	465	1	3641	466	97	23
9754	36		892	690	1752	158	298	125	42	329	308	287	215	106	2847	185	27	19
9755	22		1337	1161	1546	123	190	84	37	224	58	304	315	43	3982	142	4177	17
9756	117		340	244	1063	203	256	48	12	170	62	314	210	24	2502	99	6559	2
9757	35		90	383	910	63	92	49	4	45	13	98	61	17	1841	54	697	9
9759	25		91	100	1086	163	388	132	9	0	0	215	283	34	3420	138	167	7
9762	53		268	250	641	55	128	30	16	49	11	99	124	14	4457	39	6270	6
9768	44		1097	1642	2985	120	425	115	10	264	158	366	270	135	3012	251	6961	16
9769	46		291	245	1452	87	262	23	0	144	77	195	190	17	2910	138	0	0
9770	70		395	524	2957	191	556	192	44	233	147	304	227	131	3193	230	1639	19
9771	45		834	332	1884	195	545	103	15	164	150	328	220	116	3569	263	14137	3
9772	44		515	516	2842	123	457	192	15	147	46	273	248	51	3239	143	430	0
9774	139		523	654	2533	114	291	114	29	274	59	431	277	39	4046	120	82	12
9775	118		1812	2693	3013	111	188	69	45	295	268	379	311	100	4300	231	354	14
9776	50		1068	1622	3074	110	169	54	20	174	38	344	331	50	3942	177	5116	8
9777	62		1053	923	1442	138	429	122	18	288	163	289	230	182	3320	264	108	20
9778	24		561	487	943	95	211	48	16	99	25	192	135	28	1938	61	188	0
9779	179		1578	1809	3216	182	318	87	45	332	326	592	463	141	7857	403	68	24
9780	102		1437	1723	1743	75	184	95	12	240	62	270	195	15	4088	106	4532	7
9781	58		1349	1030	3814	86	289	119	41	428	140	422	339	76	4197	182	261	6
9782	78		1023	1006	2506	61	214	85	21	208	156	278	291	101	4108	148	100	13
9783	27		3255	2329	3887	199	298	150	84	458	130	550	466	65	4802	295	11	166
9784	140		392	336	811	146	226	52	9	103	82	246	199	85	1961	235	11532	5
9785	27		419	2470	1545	68	207	28	12	108	99	135	155	8	2319	75	2928	4
9786	102		725	1063	2351	139	338	138	39	254	226	477	324	107	4073	316	21	24
9788	36		366	522	3100	97	294	106	23	126	107	290	172	171	2971	151	2114	10
9789	107		1942	875	2088	214	710	198	21	363	316	647	444	98	6541	561	3500	4
9790	406		123	538	811	128	489	33	0	93	19	117	93	64	2883	150	91	13
9791	143		904	699	2178	179	408	125	15	273	188	312	243	0	5816	281	25	3
9792	125		1352	1600	2925	77	279	86	22	284	229	441	365	0	3773	273	45	11
9793	36		577	543	2053	71	455	109	14	164	120	307	269	165	2834	254	8229	40
9794	29		1563	1426	2982	169	379	97	28	255	67	456	304	49	4671	211	179	30
9795	192		1551	2391	4342	99	256	163	46	581	507	284	276	101	4121	268	287	22
9796	154		1590	1750	3145	190	346	134	28	535	419	316	363	166	4906	261	1351	23
9797	30		113	122	895	124	331	114	14	55	36	241	129	26	2541	174	20	0
9798	196		97	29	1016	40	325	68	9	35	0	106	104	25	2611	83	8	13
9799	132		493	237	905	118	128	45	13	132	102	217	146	89	2480	157	69	24
9800	88		450	216	1901	175	764	111	15	190	105	362	197	225	3086	232	8793	21
9801	76		117	79	1019	86	311	32	7	39	18	105	103	60	1706	101	540	3
9802	61		705	666	2619	136	394	97	12	284	201	241	275	213	4487	234	99	13
9803	141		855	1375	3093	75	184	85	35	392	404	370	410	16	4388	163	1893	19
9804	87		1851	2516	3562	133	398	128	88	242	128	536	361	66	6236	224	1021	55
9805	206		507	168	997	110	279	82	9	136	94	279	176	92	2618	174	435	15
9806	180		466	302	1306	85	367	129	0	205	74	315	191	41	3258	130	86	10
9807	68		981	1777	2763	200	679	105	31	521	350	394	282	222	5642	206	2610	35
9808	43		2596	3377	4173	124	280	99	46	477	339	299	276	214	4116	203	54	22
9809	27		1540	1779	3479	157	337	173	27	423	325	427	258	16	4426	312	781	24
9811	156		1765	1311	4338	140	220	57	14	350	279	420	329	0	3480	214	2197	13
9812	93		1098	1067	1696	149	300	105	29	296	288	394	221	93	3120	198	933	10
9813	194		711	446	2027	169	296	132	11	372	209	290	313	160	5956	206	4847	1
9814	182		819	875	1673	104	158	69	23	368	196	232	209	137	3329	158	6721	7
9815	66		1217	2664	2217	81	182	89	28	416	486	346	360	12	5204	185	734	12
9816	99		1695	1608	3413	165	297	174	41	426	400	684	524	146	4831	385	1198	17
9817	122		295	650	929	115	269	44	4	313	281	191	212	16	3633	188	3714	13
9819	17		425	377	883	62	136	62	0	116	59	146	115	18	2864	72	555	5
9821	76		879	305	1434	136	215	40	5	154	43	321	256	14	2375	128	26	9
9823	160		88	182	663	25	87	20	0	36	29	127	136	6	2121	69	35	0
9824	7		442	206	758	127	151	96	14	88	85	189	209	56	2069	83	3583	1
9825	23		712	672	929	59	255	58	8	227	175	204	164	33	2864	105	294	12
9826	45		295	724	681	85	375	85	1	139	52	220	210	40	3506	79	1462	28
9827	33		538	238	1056	90	163	59	9	261	229	196	233	23	2090	87	32	1
9828	62		239	378	585	56	142	25	1	32	7	59	26	7	2521	17	226	4
9829	12		203	753	398	36	141	23	1	3	0	46	40	12	2466	26	1932	5
9830	48		1087	663	1131	175	385	115	30	80	11	637	352	121	2649	223	3912	33
9831	22		204	86	693	105	284	68	11	62	17	138	171	22	2741	67	48953	24
9832	36		238	1413	1387	76	238	37	13	19	7	175	80	57	2415	96	1824	3
9833	25		371	783	1593	117	504	87	21	148	123	216	174	16	2772	137	140	15
9834	49		1653	377	2086	255	505	290	70	1107	797	305	462	19	5606	181	2144	27
9835	11		409	717	1261	177	214	60	28	153	154	170	85	16	2834	142	99	6
9838	30		89	230	661	64	138	23	14	52	8	79	41	43	1821	27	15	3
9839	69		230	440	1075	72	313	106	3	98	64	109	123	29	4652	68	9256	3
9840	48		501	200	932	44	119	87	18	112	100	115	179	24	1916	113	474	9
9841	26		3037	3376	3893	160	322	223	114	709	516	624	403	63	5826	258	36	34
9843	17		1537	2979	1727	129	424	106	44	375	405	460	294	62	4079	234	34	65
9844	34		533	268	809	177	310	134	2	303	70	300	295	59	3284	144	30	8
9845	20		1895	1025	3730	106	416	194	50	926	744	772	357	49	3504	350	5	0
9846	24		629	141	904	251	439	155	21	421	279	543	483	80	4651	277	464	4
9848	23		288	57	535	231	434	163	12	230	122	216	124	22	2768	178	15238	1
9849	5		995	2722	4421	159	323	114	128	393	152	406	318	51	4944	193	5226	60
9850	90		668	98	642	112	201	76	5	188	37	185	243	43	2565	100	7786	5
9851	26		697	440	1365	133	128	87	50	285	30	309	272	19	4333	103	221	5
9852	7		2082	2139	4730	114	399	194	64	482	472	497	314	80	5770	237	3011	51
9853	272		682	495	2745	123	201	153	29	421	400	719	645	1	3614	517	30	5
9854	322		472	136	615	144	210	114	6	234	68	339	312	49	3136	155	6466	9
9855	28		715	393	1430	165	214	86	28	131	180	208	357	68	4212	101	170	15
9856	23		2828	3359	4465	168	341	153	127	704	251	740	471	57	5218	299	593	39
9858	21		1849	804	1902	199	317	112	31	539	428	491	314	58	5223	207	2028	36
9859	107		1478	251	1659	154	352	109	19	190	283	191	273	62	4613	135	149	34
9860	44		501	233	488	68	174	46	3	102	55	134	96	21	3543	121	770	1
9861	39		153	45	869	224	310	231	20	132	42	423	340	40	3329	150	179	1
9862	23		420	384	1054	239	418	57	10	220	106	199	260	30	2671	172	44295	7
9864	61		222	120	542	115	379	35	8	69	17	189	236	37	2815	67	151	16
9866	100		570	267	1111	86	141	112	30	240	173	250	252	60	2276	190	13531	6
9867	15		660	269	952	209	350	117	67	227	121	432	358	56	2407	136	152	30
9868	38		187	119	697	91	186	20	10	77	39	105	156	21	1601	106	9998	0
9870	21		287	116	654	283	403	151	16	107	31	79	233	43	3296	113	39	4
9871	9		531	2268	1437	64	257	31	6	164	82	269	133	57	2408	127	1573	9
9872	28		337	277	1289	111	226	64	18	252	117	283	262	22	3263	119	17	15
9873	48		707	195	1049	176	306	68	16	216	80	287	265	68	3593	69	44668	13
9874	50		159	81	417	115	183	59	20	113	20	137	163	8	1513	90	60	0
9875	187		537	29	944	142	257	147	9	137	38	335	255	55	2747	110	190	5
9876	36		783	611	1247	79	245	110	21	183	230	267	369	100	3438	210	32285	0
9877	13		415	403	1817	146	461	56	9	139	36	169	181	30	3055	71	3748	13
9878	16		159	54	1068	191	609	182	22	142	43	260	218	32	3918	155	4390	12
9879	24		75	137	600	200	777	129	5	2	0	286	113	5	3630	322	4890	2
9880	41		238	288	903	89	147	14	7	14	3	259	19	22	1195	84	6250	1
9881	35		125	165	830	99	331	96	14	42	11	168	165	30	2809	121	4029	6
9882	10		598	220	1141	214	528	173	5	218	127	294	344	104	4100	158	331	4
9883	135		176	82	1097	86	476	157	10	160	92	300	274	40	2651	167	5	6
9885	14		410	331	1235	234	476	133	33	223	106	336	296	19	2968	178	75249	7
9886	12		1462	1047	3521	214	493	189	65	332	114	571	447	65	5245	290	22687	31
9888	0		1558	4081	7849	127	548	375	109	276	228	492	443	61	5923	178	59	37
9890	10		647	784	1694	95	191	52	21	164	47	238	173	26	3530	105	20	10
9891	7		2417	6771	4125	140	339	170	203	600	850	484	520	53	6228	595	2	89
9892	52		1069	777	2198	182	317	130	29	392	350	550	598	91	4715	267	28	17
9893	35		2355	2990	5389	125	534	165	24	690	665	468	436	61	6541	337	7	114
9894	18		1474	1175	2039	98	292	128	43	339	234	214	200	35	4672	188	929	25
9895	16		1509	1422	2500	256	310	89	69	280	93	507	373	36	4559	225	52	20
9897	9		1528	2092	1526	206	332	169	74	459	476	484	519	95	4087	322	16	24
9898	8		1255	1660	3316	232	497	403	27	773	642	641	489	41	5644	313	6	25
9899	140		279	157	699	234	299	125	18	95	22	273	160	21	2469	100	59883	2
9900	15		761	1033	1473	403	416	171	64	0	1	536	568	171	3556	639	5424	25
9901	11		82	686	745	106	292	102	6	44	16	82	41	10	2601	76	287	6
9902	20		2020	1975	2899	138	289	98	45	285	90	439	327	38	4824	193	3339	20
9903	25		442	100	1288	157	272	97	6	64	19	275	256	33	3247	107	461	8
9904	20		1407	1489	4001	201	363	144	39	596	375	412	510	33	4634	318	533	20
9905	41		858	701	2269	538	852	206	52	593	408	768	577	49	4275	474	4434	31
9906	7		307	347	1448	208	296	79	8	233	162	277	174	32	2140	145	1094	4
9907	175		328	220	961	144	148	61	13	245	171	191	172	72	2675	200	1021	15
9908	40		515	595	1750	314	326	165	52	292	198	420	252	95	2482	278	3017	39
9909	77		113	357	1234	60	254	80	5	114	40	105	78	9	1826	109	22650	11
9911	363		95	111	1365	80	252	40	23	46	7	280	246	36	2620	114	12	18
9913	109		294	149	491	110	72	92	18	83	65	134	180	22	2282	68	68	4
9915	63		1855	988	2628	197	284	67	26	402	382	367	378	18	4853	199	9217	11
9918	42		634	277	961	41	209	47	12	269	150	348	187	39	2273	147	12	6
9920	121		75	76	707	66	343	169	5	173	32	385	179	9	1616	326	612	1
9921	134		1049	480	1739	132	422	155	7	335	189	356	247	37	2972	275	35	4
9924	93		709	814	2945	66	190	60	10	206	164	185	208	45	3085	159	5	3
9927	2		642	596	1881	100	557	234	39	394	203	226	291	39	3263	390	37	4
9928	5		950	280	2382	157	565	252	34	108	46	349	255	55	4098	152	90	24
9929	40		98	64	904	29	127	26	1	70	37	82	78	15	1440	56	40001	1
9930	15		763	545	1540	73	340	84	10	100	50	246	193	45	2113	90	53	6
9931	182		324	145	697	91	96	29	10	68	65	79	75	29	1597	57	2022	5
9933	739		51	405	1035	95	215	42	2	45	43	172	117	40	1866	125	5190	1
9934	110		1202	733	3373	249	352	195	28	291	145	567	419	89	3601	209	36	1
9936	27		517	652	1916	76	259	115	22	118	35	220	198	44	2805	125	1	23
9937	177		317	389	3039	108	424	65	12	164	69	119	159	9	7321	64	23779	4
9938	30		1345	831	2142	102	446	188	19	180	58	341	291	48	8369	134	7384	2
9939	22		1087	775	2007	176	338	83	54	215	64	306	361	28	3640	188	6602	16
9940	35		107	358	1174	37	282	65	7	68	13	71	99	33	2013	41	1624	5
9941	36		385	311	1938	124	517	61	3	199	150	253	257	29	2838	140	334	1
9942	20		1528	1130	2134	175	447	406	48	463	164	559	454	60	4331	234	1941	12
9943	26		472	372	1497	117	249	101	13	427	218	184	261	51	3241	200	61	6
9944	38		1865	3987	1846	158	533	179	33	5	14	779	400	213	7304	457	43	8
9945	14		272	0	1421	65	266	17	7	44	10	119	128	13	3176	47	215	3
9946	49		1068	564	2488	149	475	62	17	220	119	309	346	50	4050	155	11742	18
9947	18		143	718	683	62	0	43	5	43	15	120	46	98	1721	72	406	0
9948	28		137	199	2095	184	153	52	16	50	14	118	99	22	1836	40	614	3
9949	28		464	1284	2262	214	283	98	81	133	55	325	238	56	3453	117	3	66
9950	24		603	590	1676	86	501	128	10	282	99	429	433	52	3522	245	2331	9
9951	39		865	726	990	77	95	20	10	161	123	154	189	49	2748	119	11253	10
9952	57		117	788	1299	12	139	16	0	93	48	82	71	14	2205	60	149	2
9953	43		542	319	741	121	96	39	29	148	166	152	170	37	2847	109	26	4
9954	44		684	455	1312	205	230	107	24	268	255	291	241	34	6887	184	8376	15
9957	35		1360	1153	2093	105	236	72	22	261	267	245	292	36	3065	188	1843	8
9958	53		1951	1134	3175	196	331	124	51	869	961	557	525	51	3866	374	17	18
9959	20		341	243	972	46	156	53	10	47	83	92	43	24	1748	36	4486	4
9960	129		105	457	1191	89	238	44	6	160	112	200	112	47	2407	128	2765	5
9961	2		1041	1633	3886	177	714	162	27	238	117	454	272	154	4288	258	5380	14
9962	33		95	67	561	1	27	9	2	32	3	4	30	9	2304	4	1022	0
9963	27		122	376	1483	68	436	80	9	147	31	102	134	13	2331	121	11368	4
9964	30		336	656	1653	56	325	73	7	161	146	206	326	40	2839	127	2630	16
9965	13		1644	1503	1632	137	358	104	20	306	311	419	375	23	3413	307	109	14
9966	13		976	718	4035	105	415	65	29	240	155	465	238	25	3768	189	6870	2
9967	29		255	369	1404	152	215	46	7	60	23	181	154	15	2067	86	35	12
9968	60		231	266	1157	148	282	105	8	237	83	181	127	11	4107	170	118	0
9969	17		1347	1143	3522	206	640	118	43	301	99	531	387	94	5327	223	4509	21
9970	93		249	160	876	41	271	64	12	119	63	139	104	48	2188	101	1220	2
9972	54		782	613	1265	165	268	142	22	205	107	295	252	39	5097	185	2372	13
9973	32		203	384	1023	59	95	9	2	21	2	39	39	3	1408	16	1142	0
9976	58		1919	1463	2127	178	331	111	50	327	83	314	207	22	4814	130	3195	9
9979	131		547	285	1555	180	196	123	11	178	102	265	193	65	2710	129	3790	3
9980	58		653	231	1563	177	291	99	55	410	310	481	698	116	2374	240	4911	54
9981	47		332	365	1064	259	542	117	27	179	111	408	269	40	4026	211	69345	3
9982	58		859	303	1162	248	348	124	11	326	91	382	283	90	2804	152	43560	8
9983	22		1439	991	2477	181	520	141	38	549	400	587	489	101	6903	289	277	37
9984	4		587	399	900	209	336	123	9	322	228	198	170	105	2440	227	35436	14
9985	68		91	191	1588	0	41	35	9	51	19	38	33	0	1907	58	6	0
9987	7		417	326	875	116	201	105	7	105	35	153	187	27	2205	127	36	41
9988	16		1836	1967	2857	249	433	85	92	332	267	307	243	126	6963	165	162	78
9989	4		291	138	905	98	183	150	20	330	137	329	250	128	2418	199	50911	20
9990	4		141	311	793	81	228	80	2	0	1	174	102	14	2258	57	21	12
9991	65		100	117	1169	24	52	10	0	71	24	28	39	8	3323	20	24	3
9992	11		958	2180	4224	385	657	139	124	223	74	508	508	107	4727	194	61	110
9993	10		651	1360	2471	175	254	82	37	92	89	176	221	74	2190	115	856	49
9995	234		232	156	978	96	289	73	7	77	10	115	117	16	2293	82	107	1
9996	527		159	561	968	80	102	81	9	97	47	140	93	36	1248	81	42	4
9997	83		1568	502	1178	156	389	124	27	515	486	453	400	0	5916	339	52	11
9998	50		849	857	1279	66	187	47	13	158	114	193	197	0	2319	148	164	0
9999	60		670	613	1476	39	196	47	10	172	159	226	128	87	2931	104	3405	16
10000	22		470	264	1584	217	409	116	10	241	173	430	306	9	3362	279	48569	4
10001	11		895	1081	2524	163	379	122	18	396	300	409	317	0	3382	312	4998	20
10002	282		639	616	2037	103	257	56	24	171	118	211	232	34	6124	106	7738	16
10006	14		551	400	785	114	203	125	6	204	122	227	216	36	3814	179	6469	1
10008	41		85	371	879	46	141	7	3	60	7	66	23	5	2321	45	1466	0
10009	21		852	984	1202	203	264	105	37	207	247	281	243	84	7684	170	5717	29
10010	93		1864	1193	1712	150	242	67	36	371	352	405	299	97	4016	243	2234	14
10011	16		741	1286	3398	242	507	158	48	202	178	508	293	75	3569	347	7502	68
10012	16		1106	724	2423	180	247	117	47	348	198	267	251	31	5097	151	95	53
10013	20		2174	1941	7623	592	822	347	153	1	4	701	676	125	8011	261	49	137
10014	22		443	397	1389	221	434	161	47	3	5	215	304	41	3550	107	34308	48
10015	61		1173	1630	2279	162	278	100	56	372	395	474	272	111	5784	343	543	62
10016	12		277	891	1900	91	491	87	12	140	74	219	196	11	4067	108	794	2
10017	32		384	864	1158	70	256	34	5	160	142	139	61	61	3240	76	5625	6
10018	30		1119	288	960	264	260	90	37	526	433	333	230	193	5065	271	35	10
10019	211		235	486	1601	77	155	38	10	203	127	138	101	33	2304	59	160	17
10020	93		248	186	881	192	416	105	6	138	171	317	370	18	3307	138	2847	4
10021	90		450	624	1657	53	311	60	12	244	105	196	213	0	3930	121	281	0
10022	31		245	298	1184	96	268	61	12	102	38	177	125	0	3491	135	98	1
10023	21		370	579	1517	306	418	98	26	444	248	510	444	48	2646	338	7995	12
10024	36		204	1149	2556	211	719	227	20	463	371	525	405	47	3648	371	1381	42
10026	141		522	170	935	299	345	110	52	479	322	624	706	7	2238	579	386	39

## Sheet: At1g51140
accession ID	AT1G51140		AT1G52830	AT1G29430	AT1G29440	AT1G29510	AT4G38850	AT4G13790	AT4G38825	AT5G18080	AT5G62280
108	1426		188	458	105	44	74	0	NOT AVAILABLE	20	88
139	797		254	915	660	286	574	6		562	1317
159	646		46	333	330	166	83	0		193	1123
265	988		73	423	250	208	257	0		499	1487
350	551		82	850	1108	690	250	1		587	915
351	523		46	685	602	357	149	0		533	1262
403	1268		231	757	426	471	240	1		271	443
410	505		221	203	150	146	90	1		187	1238
424	399		187	177	146	80	35	0		132	821
428	326		211	204	51	143	57	1		97	1066
506	489		47	681	160	573	322	4		509	942
630	444		317	900	169	576	522	2		662	2437
687	469		93	794	218	626	494	0		731	829
728	478		224	1273	361	1066	452	2		949	2955
763	785		24	417	196	151	93	0		53	133
768	231		30	137	91	203	275	3		169	610
801	844		66	254	174	51	98	3		162	366
870	323		209	621	132	492	278	6		430	1304
915	486		55	541	808	425	157	2		333	965
932	380		113	84	45	49	39	1		167	1251
997	560		138	200	182	150	99	0		303	338
1002	1331		261	499	437	74	173	0		273	140
1066	993		145	664	319	241	193	1		370	242
1158	474		143	223	160	128	119	2		166	268
1317	1682		522	796	467	424	258	0		589	167
1435	994		6	123	100	115	57	0		84	748
1684	565		26	669	175	864	152	3		606	1708
1741	501		18	529	117	521	214	0		387	395
1829	574		91	654	153	523	174	1		299	994
1872	697		21	519	255	518	110	0		163	1533
1890	705		2	291	132	186	37	0		73	241
1925	542		21	537	312	448	88	1		181	958
1954	1051		14	386	80	468	81	2		123	1110
2016	669		9	338	161	339	30	0		83	839
2017	816		32	578	140	697	119	1		406	1149
2031	432		8	332	84	577	54	7		183	3196
2171	604		30	585	565	325	174	0		258	800
2202	790		116	452	347	361	101	0		189	770
2212	497		111	773	166	577	238	3		460	1291
2276	559		167	800	156	521	252	3		392	771
2278	746		22	516	113	520	97	0		159	753
2317	420		58	510	508	289	163	2		334	1455
2370	468		176	848	202	651	266	4		519	1266
4779	1017		62	377	91	352	176	2		366	306
4807	465		362	608	430	435	276	9		678	1259
4826	885		223	472	274	308	356	5		560	498
4884	640		169	329	345	183	76	7		220	1767
4931	564		18	398	186	284	103	0		67	389
4939	700		26	569	314	521	195	1		458	507
4958	676		123	532	114	351	164	4		309	686
5023	1006		172	535	274	412	246	0		495	420
5104	911		17	565	475	337	183	3		384	752
5151	640		129	571	358	346	329	12		580	612
5210	898		6	283	56	262	28	0		123	691
5236	681		11	330	177	254	110	0		155	611
5276	508		92	96	140	140	17	0		49	197
5279	402		87	562	350	450	193	1		381	880
5349	611		16	362	425	441	162	1		321	1101
5353	1795		138	144	103	137	71	0		197	92
5395	900		21	419	43	214	38	1		116	229
5486	529		77	546	597	324	182	3		363	1379
5535	933		230	495	153	528	411	9		874	1988
5577	915		90	185	34	185	131	2		222	103
5644	927		148	567	699	391	192	2		356	420
5717	968		0	403	454	287	64	0		287	506
5718	436		6	703	970	430	221	0		448	1338
5720	830		243	139	141	196	70	0		289	700
5726	757		135	267	95	270	58	1		289	704
5741	501		198	769	1258	807	438	4		932	1295
5748	885		106	104	108	146	69	0		162	594
5768	753		22	315	62	238	91	1		197	182
5772	625		444	547	551	401	267	10		759	1526
5778	447		233	792	932	509	224	1		381	3653
5779	487		198	838	497	667	363	7		563	2820
5784	507		101	663	525	479	246	1		721	1009
5798	698		183	526	321	426	273	4		518	1107
5800	559		259	626	452	513	491	1		668	1544
5811	725		184	311	275	329	273	1		438	1237
5818	543		107	198	207	190	62	0		138	1070
5822	314		281	61	38	59	34	1		110	2621
5831	598		99	406	96	281	175	5		156	405
5837	1092		194	578	414	336	231	2		433	1057
5860	749		203	374	115	103	138	0		159	475
5874	286		478	74	17	50	74	0		79	1282
5890	243		136	85	17	64	72	2		91	2324
5893	673		42	169	128	78	133	1		94	526
5907	746		21	270	332	179	164	2		383	1046
5921	579		27	289	185	120	154	0		107	550
5950	718		191	211	198	229	111	0		204	329
5984	568		60	319	394	173	217	0		349	901
5993	503		83	276	204	188	134	0		137	777
6008	1437		67	234	33	137	82	1		145	752
6009	915		103	457	100	305	131	0		370	374
6017	468		213	415	317	315	234	0		318	365
6020	1012		195	194	99	184	134	1		187	502
6024	900		239	237	128	127	96	0		222	200
6025	1049		130	246	44	132	216	0		186	112
6038	525		25	95	66	80	62	0		164	293
6041	452		75	350	159	202	164	2		227	562
6064	1136		241	207	222	241	148	1		369	2174
6086	353		74	319	251	170	240	2		507	534
6097	748		250	206	32	240	117	2		159	98
6099	1340		324	257	154	27	159	0		219	152
6106	1149		200	275	257	246	179	0		247	147
6107	634		281	247	141	80	96	0		159	106
6108	1154		318	322	68	315	222	0		457	203
6111	1113		181	329	244	234	187	0		446	71
6133	1126		100	275	142	129	209	0		229	64
6137	1029		52	537	151	224	108	2		246	99
6138	1320		241	210	118	177	71	0		112	113
6140	948		150	151	142	266	73	1		199	149
6145	1100		18	192	161	282	177	1		229	52
6148	977		72	239	146	233	150	0		224	124
6154	585		89	399	71	270	296	1		307	471
6163	668		75	346	77	194	242	0		244	478
6166	1293		136	151	46	101	89	0		143	54
6169	990		95	599	320	301	273	0		253	307
6171	1827		193	541	252	198	79	0		121	92
6174	1427		213	268	123	190	64	0		97	273
6177	2090		114	352	206	226	109	0		195	155
6194	642		73	283	258	104	73	1		157	461
6195	567		49	357	183	146	100	0		237	1888
6198	1091		107	141	122	112	118	1		77	139
6201	1413		22	339	74	118	79	0		80	106
6203	480		6	147	133	92	66	0		99	178
6217	1057		183	100	55	54	64	0		141	266
6218	948		87	176	32	103	108	1		123	222
6220	505		120	211	167	188	129	3		344	438
6240	490		60	116	75	92	142	0		115	196
6241	745		102	171	127	174	141	0		225	324
6255	1519		152	235	229	221	181	2		518	670
6268	1754		592	767	568	244	199	0		440	317
6284	387		112	361	95	295	216	0		414	936
6296	427		14	319	292	183	125	0		448	1281
6390	519		22	220	38	175	125	0		311	469
6424	594		123	115	51	126	80	0		126	822
6434	711		108	138	220	96	131	3		297	741
6445	779		30	287	189	133	119	0		105	187
6680	688		91	312	310	209	133	0		362	797
6709	699		11	197	74	243	7	0		74	291
6744	944		117	443	215	40	422	0		361	46
6830	962		142	546	429	437	214	0		244	555
6900	925		377	586	367	396	262	0		371	429
6906	604		50	217	39	130	99	0		85	924
6907	1240		130	401	205	255	196	1		350	200
6908	648		65	519	310	403	362	1		421	677
6909	660		27	246	80	119	53	1		157	1162
6911	285		384	89	15	78	35	0		89	721
6917	696		142	406	208	248	240	0		305	350
6923	717		280	831	169	584	493	4		621	1392
6933	695		12	66	46	51	31	2		115	581
6937	795		41	131	116	136	81	5		140	351
6939	918		35	328	306	247	68	1		193	528
6943	824		127	603	131	434	203	0		312	866
6944	487		28	537	682	398	210	1		399	2896
6957	797		83	321	250	159	184	0		347	746
6960	879		85	343	215	193	240	0		362	742
6966	549		55	804	805	360	304	6		350	2000
6970	1704		461	677	98	454	406	0		632	97
6971	786		498	661	397	484	289	2		740	693
6973	654		112	297	74	227	90	1		230	804
6974	380		58	413	73	236	161	1		208	936
6976	672		95	295	52	171	29	0		128	390
6979	1615		140	495	475	309	262	5		844	495
6989	539		68	726	207	544	234	0		363	361
6992	575		50	206	32	239	107	5		179	448
7013	339		169	524	414	607	192	0		317	2545
7028	686		14	658	530	281	163	0		184	2338
7033	492		184	1021	222	872	404	5		598	2019
7058	958		34	79	98	152	18	1		98	300
7067	1192		127	196	36	185	79	2		245	201
7094	621		43	611	642	505	119	0		244	727
7102	366		46	272	137	214	123	0		211	664
7103	769		168	437	110	375	172	2		276	496
7106	1107		119	337	224	226	84	0		100	280
7107	994		109	906	809	420	356	0		392	153
7111	571		131	376	503	358	72	0		193	751
7119	635		104	126	87	188	70	0		133	323
7161	1197		185	338	59	188	246	0		189	262
7164	1522		155	303	128	176	112	0		265	158
7165	1049		394	681	490	639	235	1		329	610
7167	526		26	386	392	413	116	3		407	1970
7169	457		19	411	290	163	271	0		140	790
7186	1374		246	218	147	161	51	0		26	57
7202	481		96	162	25	135	53	13		143	909
7218	1006		70	297	199	164	131	1		111	369
7231	508		68	404	334	468	213	4		378	1310
7244	769		42	647	714	605	139	0		111	869
7248	741		45	317	82	443	182	2		256	403
7250	2328		148	643	373	268	93	3		397	309
7263	542		111	185	170	191	143	4		190	154
7282	647		25	138	191	198	45	1		55	558
7288	878		66	423	338	254	65	0		249	379
7296	1623		3	140	19	252	32	1		80	655
7308	620		155	316	434	255	172	0		191	78
7316	349		104	397	115	329	277	0		395	514
7320	509		120	390	326	402	199	6		350	765
7322	245		284	26	28	33	32	0		46	1087
7327	634		257	398	127	262	204	3		237	657
7328	281		547	42	24	23	82	0		131	813
7330	1246		122	199	45	117	75	1		301	593
7346	422		0	307	250	247	100	0		360	3155
7350	1000		142	222	212	244	90	1		341	289
7353	646		223	365	83	409	132	0		344	1258
7354	474		263	724	601	310	394	0		746	792
7355	819		73	353	66	155	258	2		410	122
7372	369		254	154	107	71	51	1		106	1503
7373	681		104	179	312	168	96	2		180	377
7377	1267		130	428	96	390	334	0		276	227
7384	542		304	367	258	73	113	4		326	182
7396	426		77	187	95	86	117	1		80	704
7404	592		393	531	618	582	297	4		607	863
7413	727		29	174	229	142	134	1		218	279
7418	197		124	161	104	17	164	0		187	1501
7424	461		27	236	235	308	69	8		252	3396
7427	1038		60	307	305	222	204	2		305	581
7458	417		108	359	377	234	67	7		223	562
7461	857		21	323	181	101	67	0		170	208
7477	182		248	133	308	112	61	0		98	1921
7515	309		85	583	156	585	325	2		427	1085
7517	1292		226	277	320	264	111	0		317	303
7521	427		109	134	110	151	83	0		202	668
7717	560		607	986	714	597	641	9		755	1277
7917	296		43	97	24	125	36	3		156	2462
8077	1031		118	812	189	695	338	0		725	1067
8132	1033		128	547	465	279	181	1		208	1239
8231	469		66	470	384	341	160	0		202	485
8233	592		47	361	100	575	90	8		241	1718
8234	531		250	737	539	453	512	2		599	1578
8235	448		85	172	135	120	71	0		122	453
8236	786		14	404	54	228	65	0		147	711
8238	354		448	580	475	577	447	1		601	2204
8239	618		269	383	76	575	173	3		460	3428
8244	460		656	933	362	384	517	7		656	1628
8246	488		153	490	305	483	376	3		392	1101
8247	427		72	228	161	233	132	0		218	238
8259	379		102	341	212	238	128	1		227	567
8264	344		412	62	15	61	49	1		68	1687
8266	853		109	559	296	354	98	0		306	452
8275	382		34	160	67	232	119	5		203	1309
8284	780		37	201	56	178	65	1		97	318
8290	818		106	235	121	190	113	3		227	327
8297	620		107	309	167	250	92	1		206	482
8325	506		64	343	256	166	193	1		176	180
8334	958		165	210	203	158	29	2		68	174
8337	655		118	317	204	204	207	1		312	80
8343	271		46	420	301	345	138	2		272	974
8351	937		151	366	175	208	133	0		217	289
8353	1020		458	703	334	252	248	0		302	175
8357	613		39	210	107	137	152	1		307	1068
8365	711		59	265	158	146	109	2		168	331
8366	889		79	459	449	318	142	4		309	760
8378	287		296	96	102	111	54	8		178	1165
8386	1155		107	283	45	132	74	0		87	614
8419	396		359	372	92	343	297	15		182	1622
8424	696		81	362	54	355	294	0		265	560
8428	831		10	257	210	104	65	0		123	510
8430	616		28	228	164	187	48	0		97	376
8472	550		46	157	156	203	53	3		248	2475
8584	1715		99	187	32	182	100	0		179	35
9067	881		169	557	299	271	368	0		404	665
9075	406		494	894	549	528	424	1		573	2031
9078	501		132	604	346	332	416	1		420	1203
9079	892		88	411	79	257	222	0		294	321
9081	346		164	703	425	530	508	3		556	2371
9084	1298		679	567	420	425	453	0		594	671
9085	1251		553	495	361	376	315	1		543	671
9089	719		254	616	350	369	376	1		531	912
9091	679		113	387	279	178	310	0		264	735
9095	590		247	288	157	173	177	1		296	595
9099	1101		166	390	251	281	266	0		354	236
9100	265		349	60	50	53	88	0		83	1293
9102	600		298	244	132	134	181	8		198	808
9103	665		174	270	146	153	167	0		200	1056
9104	349		623	95	72	73	63	2		129	490
9105	455		76	227	113	124	134	2		146	744
9106	492		246	403	218	214	277	2		316	927
9111	814		150	283	144	122	157	1		190	515
9113	600		295	450	268	243	260	1		382	1470
9114	633		102	313	148	161	269	0		252	744
9115	518		135	274	135	166	136	0		173	672
9121	743		72	347	291	316	216	1		238	1428
9125	423		65	300	246	317	233	5		238	1355
9128	493		228	489	381	495	340	2		401	1694
9130	471		152	460	334	467	338	6		446	2000
9131	546		51	489	299	447	262	5		350	1706
9133	401		79	671	467	633	426	0		546	2290
9134	322		82	489	348	484	340	5		361	1870
9298	830		128	564	109	421	251	1		416	643
9312	561		307	804	511	665	281	8		535	1683
9314	572		164	450	106	400	247	4		437	1480
9321	1490		277	307	171	236	109	0		229	234
9386	1292		432	249	185	222	239	0		185	74
9388	1067		380	224	153	181	155	1		215	223
9404	808		187	162	141	235	105	1		135	329
9405	505		10	223	147	276	106	0		211	409
9408	643		16	152	84	214	55	0		105	250
9409	500		10	230	108	115	96	0		108	256
9421	873		260	97	21	127	217	0		60	142
9433	1035		76	272	126	144	158	0		141	209
9451	803		57	165	179	148	97	0		77	347
9503	458		74	441	192	221	252	1		284	202
9506	750		27	441	228	281	154	4		329	1088
9507	1594		325	220	85	90	198	0		368	60
9508	527		337	824	1088	483	347	8		644	1532
9509	1254		175	634	651	201	130	0		407	1303
9510	1186		107	377	224	146	110	0		192	545
9511	1642		27	467	208	221	223	0		337	499
9512	1003		91	357	217	150	164	0		191	940
9513	1703		63	351	233	91	131	0		208	456
9514	955		81	437	291	151	239	0		282	169
9515	629		55	320	253	134	252	0		211	390
9516	756		60	291	202	138	85	3		279	353
9517	1385		21	307	33	149	81	0		199	144
9518	780		88	498	102	248	209	1		603	356
9519	665		138	562	386	433	497	1		641	163
9520	822		100	344	255	285	326	0		452	180
9521	1245		28	366	229	156	154	0		263	52
9522	1198		185	432	331	273	204	0		374	503
9523	794		185	239	144	133	177	0		414	530
9524	925		520	515	301	223	382	2		608	500
9525	693		147	343	60	348	217	4		441	895
9526	970		188	569	92	427	299	3		213	99
9527	1164		170	370	232	171	174	2		375	215
9529	814		76	259	250	190	224	2		503	560
9530	1289		133	106	81	112	144	0		332	67
9531	1503		51	297	245	224	422	0		481	67
9532	886		37	198	233	143	80	6		235	128
9533	1004		94	407	124	493	149	0		192	906
9534	1262		37	208	102	112	96	0		120	114
9535	1130		415	284	40	240	232	5		437	162
9537	761		115	385	225	236	212	2		345	382
9538	599		35	345	163	252	121	0		238	726
9540	836		105	242	179	169	147	0		296	706
9541	730		113	293	169	146	147	0		440	408
9542	915		130	337	124	449	91	0		198	703
9543	970		135	195	1	228	80	8		264	1622
9544	1642		165	187	169	71	105	0		212	103
9545	857		327	350	297	94	83	3		153	885
9546	1444		79	307	28	146	194	0		207	3
9547	1208		199	384	148	176	227	1		228	59
9548	1160		269	549	217	222	139	0		303	227
9549	1545		171	894	700	198	178	1		41	479
9550	823		66	302	212	117	95	0		116	370
9551	2275		75	219	18	97	87	1		152	76
9552	708		24	191	150	114	88	0		212	430
9553	741		39	202	197	99	48	0		234	891
9554	740		79	376	454	139	238	0		372	662
9556	759		129	255	55	143	230	0		213	133
9557	662		138	329	81	202	206	0		253	438
9558	420		77	442	221	267	226	4		341	702
9559	1533		250	509	456	52	243	0		424	141
9560	572		164	414	224	291	332	1		337	1316
9561	985		213	323	205	256	265	1		654	75
9562	547		66	486	277	331	341	3		763	3161
9563	696		160	282	242	329	104	1		341	401
9564	1001		214	548	77	498	363	0		381	379
9565	814		124	439	238	242	213	0		407	1628
9566	1291		69	613	71	290	282	0		452	272
9567	1702		190	491	141	280	202	0		428	382
9568	606		254	573	357	425	386	0		722	974
9569	552		49	306	204	299	164	0		381	1086
9570	1490		119	356	100	128	229	0		339	336
9572	638		67	485	91	400	363	1		687	1121
9573	1709		31	170	33	108	148	5		249	57
9574	1402		101	798	479	409	369	1		506	196
9575	1532		28	440	67	228	164	1		351	60
9576	1331		80	374	312	219	243	3		503	113
9577	1462		181	397	176	239	159	1		307	190
9578	1844		28	472	256	173	157	0		180	41
9579	1284		199	439	37	202	198	0		317	65
9580	1271		133	387	249	156	149	0		192	113
9581	1823		252	437	59	196	181	0		244	25
9582	1065		104	481	172	203	227	0		305	606
9583	731		53	456	83	333	215	0		209	499
9584	902		199	413	55	360	272	1		627	358
9585	838		84	482	71	306	373	1		552	132
9586	811		258	462	594	139	218	0		301	208
9587	1134		426	503	126	284	305	7		355	226
9588	1422		98	320	191	576	285	0		336	437
9590	821		100	134	82	44	301	0		183	22
9591	700		126	283	114	174	164	1		333	1011
9592	703		203	526	109	339	274	1		461	708
9593	1132		75	207	130	226	120	1		369	137
9594	1206		113	377	94	190	198	4		334	645
9595	682		166	450	264	366	265	2		427	166
9596	640		100	524	624	346	265	1		691	1122
9597	808		176	366	309	187	339	0		442	218
9598	1100		338	774	815	225	237	0		318	232
9599	701		110	320	219	141	153	0		235	181
9600	396		339	348	405	166	131	2		242	779
9601	520		71	296	198	195	158	0		233	203
9602	586		183	439	510	402	265	3		523	2558
9606	571		17	401	255	238	187	0		525	751
9607	710		30	270	164	210	129	0		198	883
9608	845		25	193	425	262	203	0		315	488
9609	665		62	254	191	240	114	4		232	400
9610	209		10	389	281	406	102	1		218	856
9611	873		57	539	224	272	195	0		437	584
9612	428		14	363	199	181	233	0		254	759
9613	895		84	175	111	168	108	1		165	316
9615	408		47	353	287	271	92	0		109	758
9616	853		27	385	318	300	196	0		283	429
9617	699		61	313	191	161	190	1		234	264
9619	1134		69	316	179	189	260	2		294	219
9620	1006		91	317	247	199	246	2		340	276
9621	918		277	297	186	184	209	5		350	405
9622	668		11	404	100	258	122	0		257	1059
9623	1556		30	201	95	197	20	1		145	127
9624	1237		233	120	85	144	152	0		207	81
9626	483		38	291	179	220	149	1		200	446
9627	349		76	260	195	293	257	1		365	912
9628	370		17	306	205	399	77	2		112	392
9629	1466		130	360	172	253	213	3		201	149
9630	1039		93	278	21	131	58	1		132	89
9631	1225		38	156	100	182	167	1		239	90
9632	675		26	177	45	104	143	1		101	146
9633	784		95	228	76	124	205	2		245	142
9634	697		35	257	71	126	120	0		342	765
9636	1297		45	138	27	93	118	2		167	209
9637	511		105	153	39	94	118	2		164	577
9638	1248		44	156	85	79	146	0		170	159
9639	770		42	196	47	173	175	1		390	558
9640	762		32	306	33	155	207	0		296	509
9642	1281		168	213	19	112	228	2		317	375
9644	732		302	206	185	228	158	0		222	184
9645	904		22	359	240	300	175	1		293	452
9646	651		63	285	52	233	142	0		278	395
9647	617		23	367	233	358	231	4		350	1281
9648	590		142	352	355	226	223	0		347	709
9649	164		64	377	128	268	63	2		377	1945
9650	588		58	129	83	162	49	1		160	389
9651	857		53	118	11	104	73	0		107	158
9652	1516		86	197	98	104	131	0		199	190
9653	474		53	391	209	221	164	1		316	666
9654	807		15	451	62	212	239	1		497	639
9655	284		84	359	339	290	225	7		402	1080
9656	340		133	371	274	304	190	2		441	562
9658	807		148	382	76	248	234	0		392	1249
9659	1297		12	334	176	176	168	0		453	425
9660	454		170	513	288	205	258	1		341	822
9661	1138		93	259	26	144	107	0		287	325
9662	608		65	261	94	169	88	3		103	396
9663	632		30	86	62	84	5	0		11	234
9665	702		16	266	137	73	143	0		122	229
9666	520		49	324	384	249	194	2		415	567
9668	631		34	313	161	141	143	0		148	434
9669	659		48	231	86	116	73	0		133	488
9673	512		44	106	82	107	78	1		110	576
9678	391		43	279	179	174	172	6		213	480
9679	686		84	325	193	178	131	3		246	616
9680	689		83	349	263	225	152	2		305	883
9681	607		110	358	195	197	148	1		264	535
9682	537		111	109	56	100	84	0		130	173
9683	761		84	315	192	164	113	2		215	456
9684	606		5	566	296	471	157	2		127	757
9690	881		453	294	218	249	134	15		291	216
9693	700		76	242	79	180	161	2		224	324
9696	617		67	253	142	197	120	5		256	214
9697	834		124	251	170	153	189	1		246	421
9698	683		199	176	195	243	145	2		300	219
9699	533		188	486	82	333	257	1		262	723
9701	1536		164	320	236	163	109	1		206	427
9702	735		73	369	186	143	276	0		286	850
9703	929		16	240	136	124	205	1		398	965
9704	569		117	550	143	323	265	2		513	529
9705	595		107	148	53	132	100	0		226	678
9706	171		19	623	174	344	243	1		252	1424
9707	499		48	176	48	167	116	3		216	409
9708	805		32	54	53	55	31	0		19	308
9709	994		66	359	48	319	218	0		298	278
9710	899		91	296	231	237	201	1		263	178
9711	732		20	226	26	141	51	3		68	125
9712	659		98	366	241	165	164	0		421	886
9713	403		141	339	265	223	223	1		424	948
9714	914		33	265	154	144	111	0		184	212
9717	714		48	164	223	175	75	0		161	600
9719	882		107	287	188	179	189	4		331	974
9720	917		121	158	208	245	211	1		340	148
9721	617		102	368	320	255	168	0		269	416
9722	661		120	127	86	125	25	0		96	98
9723	599		8	397	270	194	291	0		321	553
9725	1038		80	239	143	198	118	0		141	233
9726	575		17	351	239	290	228	0		309	1064
9727	1029		57	427	54	231	250	0		578	551
9728	836		185	274	283	163	146	3		328	687
9729	451		116	476	453	392	269	2		490	718
9730	579		20	71	71	55	33	1		92	125
9731	708		56	233	294	208	115	0		138	353
9732	769		124	99	111	79	75	0		97	257
9733	629		223	292	40	242	185	2		157	570
9734	852		86	421	248	345	118	2		294	455
9735	758		68	179	174	126	123	2		192	482
9736	1218		190	252	203	212	224	0		348	283
9737	550		202	327	354	198	268	8		591	1092
9738	508		94	262	21	191	120	0		324	620
9739	748		116	472	43	305	272	1		536	1048
9741	507		59	192	159	157	104	2		95	297
9742	677		28	491	267	254	270	2		333	1112
9743	709		115	161	118	164	26	0		113	105
9744	824		89	465	328	166	152	0		354	415
9745	457		52	253	156	225	263	4		244	1071
9746	706		113	218	30	217	80	1		181	523
9747	264		147	355	138	335	217	0		455	1949
9748	725		147	310	243	222	192	1		541	1025
9749	742		27	422	65	267	257	0		465	822
9754	475		51	298	243	312	158	0		215	690
9755	463		60	190	154	220	123	0		315	1161
9756	955		100	256	172	191	203	0		210	244
9757	1613		71	92	31	82	63	8		61	383
9759	1878		21	388	164	189	163	0		283	100
9762	920		223	128	84	96	55	1		124	250
9768	555		36	425	58	409	120	4		270	1642
9769	655		31	262	64	181	87	0		190	245
9770	900		107	556	151	403	191	0		227	524
9771	599		58	545	307	379	195	0		220	332
9772	599		17	457	101	471	123	0		248	516
9774	800		67	291	232	314	114	3		277	654
9775	440		63	188	161	185	111	2		311	2693
9776	349		90	169	161	259	110	0		331	1622
9777	629		9	429	205	316	138	0		230	923
9778	752		19	211	338	230	95	1		135	487
9779	578		209	318	270	418	182	3		463	1809
9780	512		200	184	33	246	75	1		195	1723
9781	571		77	289	347	224	86	1		339	1030
9782	277		108	214	235	167	61	1		291	1006
9783	278		99	298	457	303	199	1		466	2329
9784	966		63	226	237	214	146	0		199	336
9785	286		20	207	43	199	68	1		155	2470
9786	707		45	338	177	270	139	5		324	1063
9788	643		28	294	86	267	97	0		172	522
9789	780		569	710	188	489	214	1		444	875
9790	1664		45	489	196	215	128	1		93	538
9791	997		388	408	71	345	179	5		243	699
9792	435		28	279	265	181	77	4		365	1600
9793	994		37	455	212	397	71	0		269	543
9794	248		72	379	395	275	169	1		304	1426
9795	614		83	256	58	276	99	4		276	2391
9796	313		91	346	550	303	190	1		363	1750
9797	1306		195	331	166	324	124	0		129	122
9798	1504		179	325	129	266	40	0		104	29
9799	828		100	128	91	187	118	0		146	237
9800	874		34	764	415	428	175	1		197	216
9801	1615		45	311	52	203	86	0		103	79
9802	954		91	394	284	203	136	0		275	666
9803	907		80	184	176	150	75	2		410	1375
9804	295		168	398	114	389	133	1		361	2516
9805	1086		135	279	36	185	110	2		176	168
9806	752		50	367	51	271	85	0		191	302
9807	316		69	679	128	442	200	2		282	1777
9808	383		37	280	101	276	124	1		276	3377
9809	173		75	337	130	370	157	6		258	1779
9811	642		43	220	167	183	140	5		329	1311
9812	483		110	300	164	175	149	14		221	1067
9813	733		129	296	285	154	169	11		313	446
9814	524		148	158	148	127	104	3		209	875
9815	308		174	182	180	206	81	0		360	2664
9816	607		68	297	297	257	165	5		524	1608
9817	681		496	269	203	154	115	2		212	650
9819	678		157	136	92	41	62	0		115	377
9821	1920		176	215	120	181	136	0		256	305
9823	2881		247	87	32	49	25	2		136	182
9824	1020		39	151	25	169	127	0		209	206
9825	856		172	255	119	144	59	1		164	672
9826	670		413	375	268	260	85	0		210	724
9827	1108		22	163	72	75	90	0		233	238
9828	488		40	142	27	40	56	0		26	378
9829	509		19	141	80	80	36	0		40	753
9830	520		51	385	330	395	175	2		352	663
9831	1429		243	284	206	186	105	1		171	86
9832	816		120	238	190	198	76	0		80	1413
9833	828		44	504	77	282	117	2		174	783
9834	508		361	505	277	220	255	8		462	377
9835	260		62	214	123	153	177	7		85	717
9838	586		4	138	22	73	64	1		41	230
9839	1683		211	313	145	84	72	0		123	440
9840	2103		259	119	37	66	44	0		179	200
9841	434		158	322	446	322	160	0		403	3376
9843	456		192	424	338	296	129	0		294	2979
9844	755		191	310	339	297	177	0		295	268
9845	481		36	416	391	461	106	0		357	1025
9846	1143		294	439	390	328	251	0		483	141
9848	1204		147	434	215	248	231	0		124	57
9849	166		44	323	212	360	159	7		318	2722
9850	1311		201	201	112	57	112	0		243	98
9851	628		79	128	41	86	133	6		272	440
9852	246		62	399	289	295	114	2		314	2139
9853	611		108	201	262	156	123	4		645	495
9854	928		149	210	164	200	144	0		312	136
9855	688		172	214	139	148	165	1		357	393
9856	186		39	341	520	435	168	10		471	3359
9858	295		97	317	230	192	199	2		314	804
9859	745		272	352	197	148	154	10		273	251
9860	1477		176	174	73	97	68	0		96	233
9861	2180		193	310	166	232	224	1		340	45
9862	836		90	418	69	339	239	0		260	384
9864	1642		190	379	164	407	115	0		236	120
9866	1552		87	141	139	79	86	3		252	267
9867	720		41	350	445	193	209	0		358	269
9868	1302		24	186	29	189	91	0		156	119
9870	1381		290	403	72	119	283	0		233	116
9871	440		11	257	50	208	64	0		133	2268
9872	711		38	226	148	178	111	1		262	277
9873	594		291	306	179	238	176	0		265	195
9874	1368		46	183	77	81	115	0		163	81
9875	2185		196	257	229	208	142	0		255	29
9876	1640		180	245	22	202	79	0		369	611
9877	491		5	461	383	150	146	1		181	403
9878	1921		125	609	300	260	191	0		218	54
9879	1723		374	777	302	169	200	0		113	137
9880	745		51	147	23	112	89	1		19	288
9881	1264		150	331	154	167	99	0		165	165
9882	1303		163	528	153	162	214	3		344	220
9883	1566		87	476	236	291	86	0		274	82
9885	783		50	476	305	218	234	3		296	331
9886	517		44	493	259	315	214	1		447	1047
9888	270		114	548	162	294	127	9		443	4081
9890	1020		38	191	357	120	95	0		173	784
9891	321		128	339	403	886	140	2		520	6771
9892	490		52	317	88	239	182	3		598	777
9893	650		107	534	601	391	125	2		436	2990
9894	404		70	292	414	280	98	0		200	1175
9895	638		280	310	130	187	256	3		373	1422
9897	330		36	332	108	375	206	0		519	2092
9898	368		99	497	329	337	232	4		489	1660
9899	1040		128	299	119	145	234	0		160	157
9900	723		173	416	331	303	403	0		568	1033
9901	762		39	292	48	123	106	0		41	686
9902	863		107	289	167	214	138	3		327	1975
9903	838		191	272	111	102	157	1		256	100
9904	683		189	363	372	225	201	17		510	1489
9905	654		233	852	397	573	538	0		577	701
9906	693		26	296	83	250	208	1		174	347
9907	862		63	148	374	225	144	0		172	220
9908	943		44	326	264	262	314	7		252	595
9909	662		10	254	257	278	60	1		78	357
9911	1011		112	252	39	122	80	1		246	111
9913	1006		198	72	44	75	110	0		180	149
9915	571		63	284	171	189	197	1		378	988
9918	911		83	209	133	156	41	1		187	277
9920	927		54	343	186	233	66	0		179	76
9921	466		8	422	178	269	132	0		247	480
9924	345		14	190	109	180	66	2		208	814
9927	568		10	557	130	457	100	0		291	596
9928	395		70	565	435	306	157	1		255	280
9929	984		6	127	147	119	29	0		78	64
9930	965		10	340	298	233	73	1		193	545
9931	397		112	96	63	101	91	2		75	145
9933	948		46	215	106	158	95	0		117	405
9934	758		99	352	309	319	249	6		419	733
9936	923		23	259	346	329	76	0		198	652
9937	725		73	424	104	191	108	0		159	389
9938	872		191	446	294	338	102	0		291	831
9939	155		59	338	80	290	176	1		361	775
9940	629		160	282	147	125	37	0		99	358
9941	763		72	517	147	354	124	0		257	311
9942	471		112	447	171	420	175	0		454	1130
9943	766		15	249	276	288	117	0		261	372
9944	501		40	533	779	275	158	0		400	3987
9945	524		5	266	46	81	65	1		128	0
9946	862		42	475	227	278	149	3		346	564
9947	841		44	0	0	64	62	0		46	718
9948	478		52	153	76	98	184	0		99	199
9949	865		60	283	24	295	214	1		238	1284
9950	518		47	501	469	335	86	3		433	590
9951	435		25	95	86	125	77	1		189	726
9952	593		5	139	73	208	12	0		71	788
9953	604		26	96	79	88	121	2		170	319
9954	822		118	230	168	197	205	1		241	455
9957	279		35	236	194	208	105	10		292	1153
9958	673		41	331	234	293	196	11		525	1134
9959	512		30	156	57	143	46	0		43	243
9960	762		5	238	186	208	89	0		112	457
9961	421		43	714	599	408	177	0		272	1633
9962	798		64	27	31	28	1	0		30	67
9963	1064		93	436	53	207	68	0		134	376
9964	680		71	325	115	257	56	2		326	656
9965	556		28	358	159	379	137	0		375	1503
9966	553		84	415	98	288	105	2		238	718
9967	550		9	215	209	197	152	0		154	369
9968	711		190	282	135	300	148	0		127	266
9969	435		50	640	555	249	206	0		387	1143
9970	688		20	271	89	167	41	0		104	160
9972	640		136	268	126	235	165	1		252	613
9973	607		4	95	20	10	59	0		39	384
9976	370		74	331	108	205	178	0		207	1463
9979	554		117	196	103	145	180	0		193	285
9980	468		245	291	80	281	177	0		698	231
9981	1491		149	542	273	176	259	0		269	365
9982	584		72	348	275	252	248	0		283	303
9983	763		169	520	288	292	181	0		489	991
9984	875		63	336	136	138	209	0		170	399
9985	2572		0	41	31	128	0	4		33	191
9987	542		122	201	165	198	116	0		187	326
9988	696		587	433	253	245	249	0		243	1967
9989	1025		97	183	183	263	98	0		250	138
9990	1039		20	228	89	104	81	0		102	311
9991	501		102	52	36	41	24	0		39	117
9992	686		156	657	374	433	385	0		508	2180
9993	752		62	254	257	228	175	1		221	1360
9995	1202		8	289	53	157	96	0		117	156
9996	948		10	102	73	177	80	0		93	561
9997	337		410	389	55	368	156	1		400	502
9998	477		16	187	147	179	66	0		197	857
9999	407		52	196	122	84	39	3		128	613
10000	841		102	409	318	228	217	0		306	264
10001	248		97	379	57	392	163	1		317	1081
10002	474		134	257	134	174	103	1		232	616
10006	1106		203	203	57	213	114	0		216	400
10008	585		4	141	56	115	46	0		23	371
10009	490		100	264	201	322	203	1		243	984
10010	574		62	242	104	198	150	3		299	1193
10011	624		18	507	340	405	242	2		293	1286
10012	618		68	247	217	181	180	1		251	724
10013	493		586	822	666	414	592	4		676	1941
10014	949		224	434	201	220	221	1		304	397
10015	483		66	278	274	445	162	5		272	1630
10016	803		33	491	382	230	91	0		196	891
10017	489		16	256	213	180	70	3		61	864
10018	579		277	260	269	230	264	0		230	288
10019	609		60	155	82	195	77	1		101	486
10020	812		582	416	76	331	192	0		370	186
10021	572		39	311	185	203	53	2		213	624
10022	941		68	268	250	161	96	1		125	298
10023	851		24	418	296	276	306	1		444	579
10024	1009		127	719	771	493	211	1		405	1149
10026	1307		169	345	169	215	299	0		706	170

## Sheet: AT1G19850
accession ID	AT1G19850		AT1G31580	AT1G52830	AT3G03830	AT3G03820	AT3G15540	AT3G23635	AT4G13790	average
108	324		43	188	11	70	404	3	0	102.714
139	606		9	254	307	673	1330	21	6	371.429
159	562		2649	46	55	108	429	0	0	469.571
265	466		9	73	48	115	1003	10	0	179.714
350	391		1978	82	127	521	639	15	1	480.429
351	529		9	46	76	148	517	12	0	115.429
403	367		30	231	83	361	465	4	1	167.857
410	337		93	221	35	113	1141	4	1	229.714
424	322		258	187	25	82	1157	6	0	245
428	327		7170	211	11	94	2197	10	1	1384.86
506	778		15	47	27	331	689	8	4	160.143
630	556		3	317	227	548	2431	23	2	507.286
687	645		14	93	44	480	633	7	0	181.571
728	706		26	224	50	490	2177	16	2	426.429
763	430		131	24	13	80	225	4	0	68.1429
768	517		1478	30	14	184	770	3	3	354.571
801	307		47	66	11	198	429	2	3	108
870	613		159	209	29	224	1712	22	6	337.286
915	446		14766	55	50	282	484	7	2	2235.14
932	583		73	113	4	46	1383	12	1	233.143
997	332		281	138	27	156	587	8	0	171
1002	322		8457	261	45	358	534	2	0	1379.57
1066	398		9806	145	81	449	356	3	1	1548.71
1158	339		13920	143	46	321	282	8	2	2103.14
1317	228		7983	522	62	433	627	1	0	1375.43
1435	954		13	6	14	115	315	2	0	66.4286
1684	694		23	26	20	304	483	10	3	124.143
1741	575		10	18	22	347	305	5	0	101
1829	525		414	91	18	255	522	9	1	187.143
1872	913		103	21	30	187	359	6	0	100.857
1890	537		27328	2	33	118	122	0	0	3943.29
1925	538		145	21	36	66	307	5	1	83
1954	470		1454	14	21	47	356	1	2	270.714
2016	659		175	9	29	21	193	1	0	61.1429
2017	772		32	32	11	233	353	3	1	95
2031	625		8	8	3	104	266	2	7	56.8571
2171	790		46	30	60	130	512	5	0	111.857
2202	444		6942	116	43	88	291	6	0	1069.43
2212	542		52	111	25	275	790	13	3	181.286
2276	513		50	167	88	324	723	9	3	194.857
2278	702		87	22	5	81	197	1	0	56.1429
2317	602		256	58	66	215	798	18	2	201.857
2370	553		19	176	51	352	1049	12	4	237.571
4779	432		1420	62	96	233	522	7	2	334.571
4807	411		5	362	200	525	1218	24	9	334.714
4826	489		4424	223	108	504	974	14	5	893.143
4884	598		3206	169	56	147	1115	17	7	673.857
4931	835		203	18	38	135	313	1	0	101.143
4939	649		186	26	49	192	306	3	1	109
4958	452		4574	123	85	230	645	4	4	809.286
5023	543		1336	172	25	50	340	2	0	275
5104	879		4674	17	85	369	560	5	3	816.143
5151	455		65	129	86	369	720	6	12	198.143
5210	962		2	6	8	46	204	3	0	38.4286
5236	509		62	11	49	136	271	3	0	76
5276	386		52	92	11	50	632	1	0	119.714
5279	598		1876	87	92	321	610	7	1	427.714
5349	516		12	16	51	151	686	4	1	131.571
5353	338		8918	138	4	133	388	5	0	1369.43
5395	460		8729	21	15	67	78	3	1	1273.43
5486	658		10259	77	72	242	561	10	3	1603.43
5535	543		86	230	196	472	1836	18	9	406.714
5577	446		178	90	24	78	295	5	2	96
5644	567		69	148	51	264	793	9	2	190.857
5717	841		26	0	30	134	181	4	0	53.5714
5718	494		25	6	237	461	648	5	0	197.429
5720	313		7435	243	130	183	590	8	0	1227
5726	326		49	135	47	208	531	7	1	139.714
5741	496		93	198	169	431	1021	32	4	278.286
5748	375		3518	106	41	93	455	6	0	602.714
5768	533		240	22	7	187	188	7	1	93.1429
5772	439		11	444	199	516	2594	22	10	542.286
5778	832		11910	233	193	354	2039	30	1	2108.57
5779	651		5620	198	142	308	1571	23	7	1124.14
5784	401		1020	101	86	373	931	5	1	359.571
5798	600		1192	183	115	256	974	9	4	390.429
5800	622		1158	259	173	507	1495	29	1	517.429
5811	462		3193	184	103	256	1453	15	1	743.571
5818	683		18984	107	46	116	471	1	0	2817.86
5822	461		16884	281	56	38	1251	24	1	2647.86
5831	505		2354	99	24	240	587	5	5	473.429
5837	220		67	194	85	489	696	10	2	220.429
5860	387		374	203	21	103	237	1	0	134.143
5874	279		2049	478	14	44	1803	12	0	628.571
5890	362		8	136	14	62	2372	5	2	371.286
5893	406		266	42	21	69	237	4	1	91.4286
5907	446		15	21	76	167	246	6	2	76.1429
5921	487		3037	27	17	90	202	1	0	482
5950	397		2426	191	30	167	222	3	0	434.143
5984	378		62	60	44	220	492	10	0	126.857
5993	351		459	83	28	92	387	5	0	150.571
6008	488		588	67	23	55	144	4	1	126
6009	566		6230	103	189	194	518	3	0	1033.86
6017	488		4262	213	211	312	516	11	0	789.286
6020	398		207	195	43	189	411	4	1	150
6024	214		784	239	28	197	538	7	0	256.143
6025	188		5552	130	26	86	342	13	0	878.429
6038	245		331	25	6	67	333	4	0	109.429
6041	311		55	75	37	127	358	2	2	93.7143
6064	496		21	241	217	303	914	4	1	243
6086	325		463	74	55	337	962	0	2	270.429
6097	309		9269	250	32	185	297	8	2	1434.71
6099	185		55	324	42	453	848	1	0	246.143
6106	197		3706	200	21	250	468	1	0	663.714
6107	375		3566	281	52	169	197	7	0	610.286
6108	301		5223	318	27	474	648	4	0	956.286
6111	172		3652	181	43	307	278	0	0	637.286
6133	202		27715	100	21	161	462	4	0	4066.14
6137	425		115	52	33	250	587	1	2	148.571
6138	428		120	241	9	66	304	10	0	107.143
6140	248		5493	150	32	77	327	1	1	868.714
6145	264		13704	18	30	167	205	1	1	2018
6148	251		20615	72	51	273	303	11	0	3046.43
6154	409		3585	89	29	118	538	7	1	623.857
6163	284		4766	75	26	76	489	5	0	776.714
6166	206		12553	136	15	100	329	2	0	1876.43
6169	408		3132	95	148	181	329	3	0	555.429
6171	260		10442	193	124	63	142	0	0	1566.29
6174	282		7304	213	107	66	236	3	0	1132.71
6177	382		8964	114	19	44	232	0	0	1339
6194	564		172	73	35	60	451	1	1	113.286
6195	374		2490	49	27	86	482	12	0	449.429
6198	295		769	107	29	163	270	5	1	192
6201	317		322	22	18	79	171	0	0	87.4286
6203	333		141	6	13	16	194	2	0	53.1429
6217	355		5454	183	41	25	690	2	0	913.571
6218	379		4539	87	61	69	330	3	1	727.143
6220	354		154	120	33	78	796	8	3	170.286
6240	243		5767	60	20	51	323	7	0	889.714
6241	336		3050	102	32	111	505	10	0	544.286
6255	218		1258	152	29	172	287	5	2	272.143
6268	237		10633	592	18	209	604	12	0	1724
6284	211		2178	112	70	320	688	7	0	482.143
6296	451		3	14	110	161	369	9	0	95.1429
6390	227		5070	22	44	83	411	1	0	804.429
6424	284		23	123	41	69	879	1	0	162.286
6434	287		3095	108	53	101	548	1	3	558.429
6445	500		13843	30	14	77	197	2	0	2023.29
6680	350		35	91	121	340	993	10	0	227.143
6709	679		1	11	8	24	176	0	0	31.4286
6744	223		100	117	40	394	696	0	0	192.429
6830	565		1182	142	57	288	1169	3	0	405.857
6900	405		3494	377	41	224	415	3	0	650.571
6906	291		22	50	18	90	377	10	0	81
6907	372		8592	130	30	264	219	3	1	1319.86
6908	398		22	65	134	333	837	9	1	200.143
6909	953		6047	27	2	15	407	3	1	928.857
6911	278		5134	384	21	48	1888	0	0	1067.86
6917	407		4735	142	167	140	555	3	0	820.286
6923	572		14	280	146	358	2282	15	4	442.714
6933	516		296	12	59	51	503	33	2	136.571
6937	578		19	41	39	145	405	13	5	95.2857
6939	373		1259	35	58	172	337	5	1	266.714
6943	433		1726	127	61	251	1150	6	0	474.429
6944	956		437	28	134	486	838	12	1	276.571
6957	490		15	83	41	110	381	3	0	90.4286
6960	430		8824	85	47	144	405	8	0	1359
6966	531		622	55	148	336	1837	14	6	431.143
6970	276		2318	461	106	687	865	2	0	634.143
6971	355		9	498	166	603	985	15	2	325.429
6973	389		61	112	46	188	552	5	1	137.857
6974	471		1033	58	67	198	667	4	1	289.714
6976	293		9449	95	16	113	332	2	0	1429.57
6979	135		40	140	83	515	1045	6	5	262
6989	487		83	68	87	508	587	0	0	190.429
6992	527		6677	50	37	167	369	16	5	1045.86
7013	501		217	169	129	426	1042	8	0	284.429
7028	384		4664	14	51	226	221	5	0	740.143
7033	602		27	184	23	312	1534	20	5	300.714
7058	408		12439	34	42	80	191	4	1	1827.29
7067	319		386	127	24	106	288	6	2	134.143
7094	467		1028	43	48	179	369	0	0	238.143
7102	545		2516	46	43	143	602	3	0	479
7103	224		99	168	38	165	359	11	2	120.286
7106	1145		2474	119	9	114	376	1	0	441.857
7107	191		8840	109	84	428	419	3	0	1411.86
7111	387		6764	131	30	161	532	6	0	1089.14
7119	671		3115	104	35	190	397	0	0	548.714
7161	668		4584	185	24	175	445	0	0	773.286
7164	261		14679	155	77	65	228	0	0	2172
7165	923		10083	394	91	502	713	0	1	1683.43
7167	665		650	26	170	322	797	11	3	282.714
7169	204		292	19	32	112	431	1	0	126.714
7186	210		2974	246	24	124	767	12	0	592.429
7202	642		7025	96	43	174	462	6	13	1117
7218	461		8862	70	29	117	340	2	1	1345.86
7231	607		735	68	54	220	501	8	4	227.143
7244	901		29	42	36	160	531	0	0	114
7248	868		108	45	2	155	801	7	2	160
7250	629		73	148	16	213	207	2	3	94.5714
7263	377		34178	111	46	231	405	3	4	4996.86
7282	851		1759	25	11	79	246	7	1	304
7288	382		53	66	61	168	304	9	0	94.4286
7296	524		5	3	10	37	110	5	1	24.4286
7308	385		141	155	24	144	620	3	0	155.286
7316	335		266	104	59	101	671	4	0	172.143
7320	510		20221	120	41	236	506	4	6	3019.14
7322	360		665	284	13	39	2798	9	0	544
7327	455		2773	257	36	169	1621	8	3	695.286
7328	325		29	547	14	53	3549	6	0	599.714
7330	322		842	122	22	121	426	4	1	219.714
7346	549		948	0	76	161	981	19	0	312.143
7350	280		5307	142	28	194	433	4	1	872.714
7353	659		3300	223	69	218	511	10	0	618.714
7354	262		5956	263	147	467	915	11	0	1108.43
7355	171		820	73	78	352	316	17	2	236.857
7372	330		2166	254	11	49	1414	7	1	557.429
7373	502		15	104	27	102	689	4	2	134.714
7377	436		89	130	16	358	665	2	0	180
7384	232		675	304	67	240	876	3	4	309.857
7396	442		5810	77	16	83	1580	9	1	1082.29
7404	320		62	393	143	548	1496	5	4	378.714
7413	301		4644	29	37	146	563	3	1	774.714
7418	261		21	124	41	136	2508	4	0	404.857
7424	704		1893	27	62	151	831	39	8	430.143
7427	550		25	60	63	565	620	10	2	192.143
7458	507		416	108	31	274	431	2	7	181.286
7461	491		22819	21	30	75	142	2	0	3298.43
7477	315		33	248	13	57	3364	11	0	532.286
7515	462		57	85	8	252	1305	11	2	245.714
7517	244		7718	226	35	248	454	4	0	1240.71
7521	703		30	109	74	189	522	11	0	133.571
7717	539		29	607	279	658	2824	39	9	635
7917	546		9664	43	5	61	860	37	3	1524.71
8077	551		166	118	77	379	579	7	0	189.429
8132	708		1206	128	67	164	645	15	1	318
8231	454		91	66	66	166	320	0	0	101.286
8233	599		99	47	2	90	522	12	8	111.429
8234	479		1583	250	107	421	1715	17	2	585
8235	373		1414	85	17	82	941	4	0	363.286
8236	451		9	14	48	196	239	5	0	73
8238	436		952	448	202	413	2943	12	1	710.143
8239	592		10	269	87	459	1376	10	3	316.286
8244	402		867	656	84	236	4692	21	7	937.571
8246	495		66	153	112	293	1470	9	3	300.857
8247	326		5691	72	45	140	437	0	0	912.143
8259	561		7689	102	81	277	339	7	1	1213.71
8264	418		10	412	16	36	2330	8	1	401.857
8266	396		3	109	114	224	327	2	0	111.286
8275	475		132	34	30	125	479	5	5	115.714
8284	429		14	37	50	154	142	7	1	57.8571
8290	365		174	106	52	204	469	7	3	145
8297	563		43	107	94	247	447	12	1	135.857
8325	376		4284	64	46	317	261	4	1	711
8334	289		18481	165	17	106	474	3	2	2749.71
8337	359		5941	118	64	284	390	22	1	974.286
8343	694		26	46	34	215	988	5	2	188
8351	359		14608	151	36	109	332	0	0	2176.57
8353	164		1864	458	37	171	599	5	0	447.714
8357	373		49	39	35	66	633	0	1	117.571
8365	592		2057	59	23	123	230	4	2	356.857
8366	460		15	79	76	292	590	9	4	152.143
8378	426		258	296	25	51	2261	14	8	416.143
8386	460		11703	107	11	42	376	1	0	1748.57
8419	515		74	359	26	167	2800	20	15	494.429
8424	589		19	81	73	209	775	5	0	166
8428	813		24521	10	15	56	117	1	0	3531.43
8430	487		33	28	33	139	212	2	0	63.8571
8472	669		5426	46	26	87	450	34	3	867.429
8584	514		64	99	3	59	281	1	0	72.4286
9067	662		9979	169	242	251	1014	10	0	1666.43
9075	511		32	494	192	381	3037	20	1	593.857
9078	561		32354	132	141	352	999	12	1	4855.86
9079	489		28691	88	71	187	450	4	0	4213
9081	501		15931	164	162	387	2193	17	3	2693.86
9084	324		19653	679	171	454	2265	13	0	3319.29
9085	346		17886	553	132	340	1545	11	1	2924
9089	418		22549	254	41	262	989	18	1	3444.86
9091	412		31501	113	89	205	666	7	0	4654.43
9095	388		37695	247	80	162	1416	9	1	5658.57
9099	553		114	166	104	233	611	3	0	175.857
9100	361		22425	349	32	47	3342	22	0	3745.29
9102	367		97	298	32	134	2495	10	8	439.143
9103	377		8255	174	38	116	1441	13	0	1433.86
9104	296		20141	623	18	53	4154	4	2	3570.71
9105	472		42340	76	98	232	871	7	2	6232.29
9106	359		76679	246	77	248	1276	14	2	11220.3
9111	313		25001	150	43	136	1312	5	1	3806.86
9113	353		62	295	73	252	2694	14	1	484.429
9114	330		7330	102	40	170	859	4	0	1215
9115	337		9188	135	29	116	752	3	0	1460.43
9121	416		35307	72	98	232	1426	12	1	5306.86
9125	494		41616	65	61	84	1839	16	5	6240.86
9128	469		29376	228	120	366	3260	20	2	4767.43
9130	538		35887	152	120	326	2489	19	6	5571.29
9131	588		29552	51	83	259	1309	6	5	4466.43
9133	682		32066	79	131	164	2552	32	0	5003.43
9134	714		18873	82	98	149	2460	24	5	3098.71
9298	570		2965	128	96	266	588	7	1	578.714
9312	578		22	307	235	422	1080	17	8	298.714
9314	521		189	164	133	190	1105	27	4	258.857
9321	375		3224	277	120	97	368	5	0	584.429
9386	252		18941	432	40	187	467	6	0	2867.57
9388	280		243	380	73	85	423	5	1	172.857
9404	315		6132	187	14	137	360	1	1	976
9405	372		7501	10	21	100	382	4	0	1145.43
9408	308		3222	16	7	40	226	3	0	502
9409	338		3167	10	26	119	259	6	0	512.429
9421	177		206	260	15	256	692	0	0	204.143
9433	337		42	76	72	137	237	3	0	81
9451	281		5054	57	20	78	167	5	0	768.714
9503	617		138	74	53	256	473	1	1	142.286
9506	500		41527	27	76	259	917	8	4	6116.86
9507	248		10734	325	0	137	298	0	0	1642
9508	556		514	337	145	643	1356	11	8	430.571
9509	642		1130	175	34	116	928	2	0	340.714
9510	535		26	107	16	105	488	0	0	106
9511	334		3855	27	21	167	722	7	0	685.571
9512	449		4834	91	26	41	753	18	0	823.286
9513	732		3505	63	27	135	888	1	0	659.857
9514	492		3759	81	30	147	441	2	0	637.143
9515	474		4302	55	22	96	828	0	0	757.571
9516	646		11	60	28	94	1045	3	3	177.714
9517	544		3110	21	26	61	283	0	0	500.143
9518	238		3793	88	41	173	709	1	1	686.571
9519	323		182	138	86	340	925	5	1	239.571
9520	274		69	100	159	355	656	7	0	192.286
9521	218		545	28	26	137	474	0	0	172.857
9522	741		9	185	32	197	816	21	0	180
9523	413		111	185	66	222	506	5	0	156.429
9524	460		37077	520	74	450	1010	6	2	5591.29
9525	401		21	147	244	391	965	9	4	254.429
9526	674		54	188	28	255	820	6	3	193.429
9527	417		143	170	44	194	374	6	2	133.286
9529	435		7687	76	21	170	685	15	2	1236.57
9530	359		141	133	20	133	352	15	0	113.429
9531	179		45	51	50	208	227	0	0	83
9532	521		101	37	22	180	471	7	6	117.714
9533	606		3257	94	49	171	291	10	0	553.143
9534	489		6082	37	37	82	553	8	0	971.286
9535	305		58058	415	37	205	762	9	5	8498.71
9537	320		100	115	19	198	434	18	2	126.571
9538	700		26	35	67	229	643	10	0	144.286
9540	250		9	105	113	172	745	15	0	165.571
9541	411		2307	113	43	222	715	7	0	486.714
9542	532		1406	130	28	150	551	0	0	323.571
9543	704		2398	135	51	130	411	14	8	449.571
9544	363		12441	165	21	127	310	4	0	1866.86
9545	520		5851	327	33	113	565	17	3	987
9546	304		140	79	10	47	271	1	0	78.2857
9547	245		41	199	26	258	476	1	1	143.143
9548	232		15	269	88	182	708	2	0	180.571
9549	333		3154	171	52	306	560	8	1	607.429
9550	353		7107	66	31	127	718	1	0	1150
9551	350		17	75	24	82	291	0	1	70
9552	663		43	24	33	94	690	2	0	126.571
9553	924		112	39	35	136	485	1	0	115.429
9554	400		1515	79	43	218	586	7	0	349.714
9556	331		272	129	33	224	661	11	0	190
9557	426		52	138	162	298	671	4	0	189.286
9558	589		16	77	240	263	1017	9	4	232.286
9559	494		76	250	45	239	796	3	0	201.286
9560	446		86	164	70	284	1247	18	1	267.143
9561	398		5224	213	93	403	620	8	1	937.429
9562	277		10	66	317	550	1711	13	3	381.429
9563	566		69	160	99	264	660	1	1	179.143
9564	401		3731	214	90	371	960	12	0	768.286
9565	453		6675	124	66	161	752	1	0	1111.29
9566	395		4746	69	67	135	608	1	0	803.714
9567	437		3580	190	230	292	821	5	0	731.143
9568	437		26384	254	119	351	1137	9	0	4036.29
9569	1071		3852	49	66	269	946	25	0	743.857
9570	340		48	119	58	192	654	0	0	153
9572	210		78	67	219	361	770	33	1	218.429
9573	263		140	31	13	109	189	9	5	70.8571
9574	301		2	101	94	373	405	2	1	139.714
9575	354		72	28	37	189	319	11	1	93.8571
9576	225		25211	80	97	233	316	1	3	3705.86
9577	364		28670	181	53	146	486	1	1	4219.71
9578	390		39	28	25	152	297	0	0	77.2857
9579	449		2478	199	51	251	578	5	0	508.857
9580	293		119	133	23	262	560	0	0	156.714
9581	237		15675	252	36	110	615	0	0	2384
9582	449		13	104	74	278	837	10	0	188
9583	474		3107	53	54	262	460	7	0	563.286
9584	520		7082	199	56	190	768	6	1	1186
9585	227		2751	84	92	273	471	2	1	524.857
9586	400		64	258	71	283	563	3	0	177.429
9587	229		83	426	46	290	1077	7	7	276.571
9588	349		21960	98	83	249	336	1	0	3246.71
9590	250		95	100	38	159	370	8	0	110
9591	485		39	126	66	156	638	2	1	146.857
9592	281		17955	203	49	296	543	11	1	2722.57
9593	356		16291	75	27	135	576	4	1	2444.14
9594	552		29	113	101	239	607	10	4	157.571
9595	297		16088	166	65	229	712	21	2	2469
9596	279		8212	100	102	381	1336	5	1	1448.14
9597	244		350	176	77	193	654	10	0	208.571
9598	530		1317	338	77	708	504	9	0	421.857
9599	373		77	110	25	246	486	14	0	136.857
9600	492		107	339	58	218	758	32	2	216.286
9601	358		401	71	33	141	591	6	0	177.571
9602	598		42	183	147	340	1514	9	3	319.714
9606	421		866	17	47	116	293	4	0	191.857
9607	647		9022	30	80	117	270	2	0	1360.14
9608	467		18445	25	38	107	186	1	0	2686
9609	399		174	62	36	156	410	3	4	120.714
9610	444		1223	10	73	151	505	7	1	281.429
9611	295		4894	57	52	236	210	3	0	778.857
9612	417		9930	14	54	195	422	0	0	1516.43
9613	545		907	84	18	78	257	3	1	192.571
9615	590		7275	47	36	159	244	3	0	1109.14
9616	492		12838	27	70	189	492	5	0	1945.86
9617	429		17489	61	36	212	297	6	1	2586
9619	886		274	69	53	195	579	4	2	168
9620	584		255	91	57	236	518	4	2	166.143
9621	407		245	277	87	229	892	10	5	249.286
9622	396		17	11	55	196	226	1	0	72.2857
9623	368		7	30	19	142	120	1	1	45.7143
9624	380		31519	233	36	190	513	5	0	4642.29
9626	692		6008	38	12	113	307	0	1	925.571
9627	297		126	76	68	224	1006	10	1	215.857
9628	748		73	17	41	121	210	7	2	67.2857
9629	466		12968	130	49	249	308	5	3	1958.86
9630	286		204	93	26	61	104	4	1	70.4286
9631	320		4592	38	46	212	146	6	1	720.143
9632	573		8785	26	21	107	224	3	1	1309.57
9633	308		227	95	46	244	416	4	2	147.714
9634	288		122	35	17	81	980	5	0	177.143
9636	374		10069	45	18	101	230	3	2	1495.43
9637	503		596	105	33	83	1128	6	2	279
9638	492		65	44	24	107	210	1	0	64.4286
9639	433		43	42	37	147	533	2	1	115
9640	466		39	32	31	137	223	3	0	66.4286
9642	472		57	168	50	148	619	3	2	149.571
9644	278		5983	302	44	248	358	6	0	991.571
9645	580		3123	22	37	116	303	1	1	514.714
9646	460		8016	63	29	242	404	12	0	1252.29
9647	289		4280	23	52	246	456	9	4	724.286
9648	499		6200	142	64	269	611	4	0	1041.43
9649	367		4550	64	68	350	985	9	2	861.143
9650	679		624	58	18	44	472	4	1	174.429
9651	297		8809	53	10	80	261	4	0	1316.71
9652	380		100	86	28	207	330	6	0	108.143
9653	459		46	53	30	183	361	2	1	96.5714
9654	353		47	15	40	142	307	1	1	79
9655	500		10008	84	58	332	934	6	7	1632.71
9656	432		105	133	80	394	599	5	2	188.286
9658	469		51	148	94	402	440	13	0	164
9659	383		3671	12	79	202	239	5	0	601.143
9660	316		837	170	72	246	755	7	1	298.286
9661	342		7	93	36	189	232	0	0	79.5714
9662	335		83	65	28	93	460	2	3	104.857
9663	793		9251	30	5	43	156	4	0	1355.57
9665	375		1285	16	11	84	86	0	0	211.714
9666	425		2593	49	87	249	302	6	2	469.714
9668	360		1901	34	28	100	129	2	0	313.429
9669	342		8420	48	15	77	298	1	0	1265.57
9673	556		55	44	11	67	200	1	1	54.1429
9678	360		134	43	41	233	196	5	6	94
9679	383		1102	84	30	105	256	4	3	226.286
9680	421		1010	83	30	150	329	3	2	229.571
9681	367		1847	110	16	119	240	5	1	334
9682	576		10964	111	17	78	227	5	0	1628.86
9683	365		1167	84	21	94	202	3	2	224.714
9684	332		10	5	62	222	247	6	2	79.1429
9690	321		4818	453	51	268	706	9	15	902.857
9693	487		508	76	49	165	258	2	2	151.429
9696	529		5496	67	29	161	314	3	5	867.857
9697	539		24866	124	34	62	347	9	1	3634.71
9698	364		13506	199	208	256	861	14	2	2149.43
9699	710		5527	188	74	190	423	3	1	915.143
9701	283		193	164	22	101	399	2	1	126
9702	364		58	73	34	292	344	3	0	114.857
9703	572		7	16	59	132	228	1	1	63.4286
9704	386		366	117	78	400	1145	10	2	302.571
9705	280		30	107	52	54	874	3	0	160
9706	463		169	19	37	97	510	0	1	119
9707	454		142	48	45	122	512	8	3	125.714
9708	340		102	32	10	61	276	0	0	68.7143
9709	247		61	66	48	134	408	0	0	102.429
9710	384		67	91	36	314	502	2	1	144.714
9711	464		14562	20	19	81	139	0	3	2117.71
9712	427		23	98	55	116	332	4	0	89.7143
9713	433		58	141	46	156	659	6	1	152.429
9714	649		1495	33	25	109	290	2	0	279.143
9717	521		70	48	35	84	674	1	0	130.286
9719	406		29	107	57	159	624	13	4	141.857
9720	539		1296	121	57	242	376	9	1	300.286
9721	568		348	102	70	145	474	3	0	163.143
9722	320		2671	120	24	67	539	8	0	489.857
9723	420		1124	8	33	157	141	5	0	209.714
9725	432		22	80	23	71	415	1	0	87.4286
9726	518		10906	17	42	165	373	3	0	1643.71
9727	435		1333	57	51	217	456	4	0	302.571
9728	403		36	185	83	154	659	12	3	161.714
9729	671		17	116	148	498	739	1	2	217.286
9730	435		18083	20	18	62	245	3	1	2633.14
9731	419		67	56	52	97	420	5	0	99.5714
9732	344		10557	124	20	78	376	1	0	1593.71
9733	290		318	223	66	283	536	5	2	204.714
9734	449		1990	86	71	281	595	11	2	433.714
9735	529		4047	68	50	137	207	0	2	644.429
9736	470		185	190	34	279	366	6	0	151.429
9737	596		1558	202	70	258	789	7	8	413.143
9738	375		239	94	32	121	429	10	0	132.143
9739	379		289	116	63	254	408	11	1	163.143
9741	481		6270	59	31	172	363	10	2	986.714
9742	375		62101	28	36	183	236	6	2	8941.71
9743	322		12	115	6	38	539	0	0	101.429
9744	251		495	89	16	117	96	3	0	116.571
9745	722		7093	52	54	180	349	14	4	1106.57
9746	371		1609	113	39	90	377	5	1	319.143
9747	652		1515	147	86	293	664	13	0	388.286
9748	509		74	147	78	160	539	11	1	144.286
9749	396		97	27	98	203	489	4	0	131.143
9754	554		27	51	63	280	568	4	0	141.857
9755	532		4177	60	40	69	749	12	0	729.571
9756	402		6559	100	13	217	300	5	0	1027.71
9757	385		697	71	13	33	151	0	8	139
9759	441		167	21	46	189	372	1	0	113.714
9762	309		6270	223	18	73	940	1	1	1075.14
9768	501		6961	36	48	62	839	11	4	1137.29
9769	250		0	31	22	35	201	30	0	45.5714
9770	365		1639	107	85	184	400	19	0	347.714
9771	443		14137	58	40	214	694	1	0	2163.43
9772	502		430	17	64	220	464	0	0	170.714
9774	237		82	67	45	164	457	20	3	119.714
9775	255		354	63	50	82	681	23	2	179.286
9776	286		5116	90	26	100	707	13	0	864.571
9777	401		108	9	44	178	387	2	0	104
9778	503		188	19	12	98	376	2	1	99.4286
9779	248		68	209	46	238	756	28	3	192.571
9780	310		4532	200	48	234	675	27	1	816.714
9781	434		261	77	35	182	981	28	1	223.571
9782	272		100	108	41	81	561	4	1	128
9783	360		11	99	80	315	1405	15	1	275.143
9784	757		11532	63	36	265	346	10	0	1750.29
9785	455		2928	20	15	22	332	4	1	474.571
9786	523		21	45	82	177	479	15	5	117.714
9788	463		2114	28	64	229	360	6	0	400.143
9789	291		3500	569	54	421	1073	8	1	803.714
9790	186		91	45	22	75	178	4	1	59.4286
9791	301		25	388	86	336	1174	9	5	289
9792	488		45	28	50	114	481	18	4	105.714
9793	474		8229	37	57	144	284	2	0	1250.43
9794	442		179	72	46	218	1222	14	1	250.286
9795	426		287	83	50	227	1051	18	4	245.714
9796	445		1351	91	62	249	838	25	1	373.857
9797	445		20	195	66	237	212	5	0	105
9798	454		8	179	39	170	248	0	0	92
9799	469		69	100	33	143	433	3	0	111.571
9800	292		8793	34	47	120	254	0	1	1321.29
9801	520		540	45	19	66	179	0	0	121.286
9802	173		99	91	67	163	569	7	0	142.286
9803	316		1893	80	30	159	840	15	2	431.286
9804	439		1021	168	74	339	811	37	1	350.143
9805	423		435	135	45	276	496	4	2	199
9806	476		86	50	69	185	504	1	0	127.857
9807	459		2610	69	52	157	1221	3	2	587.714
9808	230		54	37	75	135	771	16	1	155.571
9809	561		781	75	43	271	846	9	6	290.143
9811	275		2197	43	23	129	372	42	5	401.571
9812	403		933	110	70	227	519	6	14	268.429
9813	150		4847	129	61	164	406	14	11	804.571
9814	173		6721	148	23	131	792	7	3	1117.86
9815	344		734	174	49	163	866	39	0	289.286
9816	408		1198	68	96	229	826	14	5	348
9817	346		3714	496	24	224	580	2	2	720.286
9819	222		555	157	28	23	220	8	0	141.571
9821	394		26	176	11	203	330	4	0	107.143
9823	245		35	247	13	35	187	0	2	74.1429
9824	314		3583	39	13	100	460	1	0	599.429
9825	258		294	172	29	84	460	0	1	148.571
9826	413		1462	413	41	242	609	2	0	395.571
9827	397		32	22	5	51	327	1	0	62.5714
9828	246		226	40	10	28	328	2	0	90.5714
9829	445		1932	19	6	28	271	8	0	323.429
9830	446		3912	51	41	261	849	27	2	734.714
9831	320		48953	243	16	165	403	0	1	7111.57
9832	736		1824	120	26	93	179	4	0	320.857
9833	323		140	44	38	163	350	2	2	105.571
9834	373		2144	361	217	326	1710	33	8	685.571
9835	318		99	62	45	126	437	9	7	112.143
9838	345		15	4	4	43	109	3	1	25.5714
9839	239		9256	211	28	149	289	1	0	1419.14
9840	366		474	259	21	133	263	0	0	164.286
9841	425		36	158	268	182	1497	7	0	306.857
9843	708		34	192	89	298	906	3	0	217.429
9844	274		30	191	65	136	420	0	0	120.286
9845	867		5	36	112	520	817	0	0	212.857
9846	303		464	294	58	339	652	4	0	258.714
9848	167		15238	147	59	250	250	0	0	2277.71
9849	825		5226	44	86	262	1255	7	7	983.857
9850	461		7786	201	5	119	380	0	0	1213
9851	254		221	79	29	147	720	4	6	172.286
9852	639		3011	62	138	295	1189	7	2	672
9853	293		30	108	52	200	753	4	4	164.429
9854	348		6466	149	53	272	699	8	0	1092.43
9855	392		170	172	52	325	463	28	1	173
9856	681		593	39	127	88	1009	24	10	270
9858	583		2028	97	18	307	634	8	2	442
9859	201		149	272	34	198	1160	1	10	260.571
9860	246		770	176	16	16	232	2	0	173.143
9861	193		179	193	105	173	178	10	1	119.857
9862	344		44295	90	29	161	383	0	0	6422.57
9864	283		151	190	8	90	329	2	0	110
9866	272		13531	87	94	100	503	0	3	2045.43
9867	446		152	41	56	273	551	11	0	154.857
9868	309		9998	24	6	51	130	1	0	1458.57
9870	393		39	290	58	274	502	4	0	166.714
9871	745		1573	11	17	79	317	7	0	286.286
9872	434		17	38	23	84	569	0	1	104.571
9873	334		44668	291	61	344	896	20	0	6611.43
9874	389		60	46	21	76	311	3	0	73.8571
9875	290		190	196	59	347	661	3	0	208
9876	490		32285	180	24	93	456	2	0	4720
9877	369		3748	5	36	108	335	4	1	605.286
9878	266		4390	125	60	226	477	0	0	754
9879	380		4890	374	54	314	379	5	0	859.429
9880	269		6250	51	11	82	132	6	1	933.286
9881	567		4029	150	11	108	276	0	0	653.429
9882	332		331	163	74	179	544	0	3	184.857
9883	502		5	87	23	164	281	2	0	80.2857
9885	219		75249	50	62	264	709	4	3	10905.9
9886	528		22687	44	88	384	787	4	1	3427.86
9888	827		59	114	301	446	1528	161	9	374
9890	495		20	38	33	87	409	4	0	84.4286
9891	503		2	128	133	335	1347	21	2	281.143
9892	274		28	52	72	262	484	3	3	129.143
9893	843		7	107	94	507	1585	34	2	333.714
9894	1119		929	70	77	231	486	11	0	257.714
9895	421		52	280	69	152	883	34	3	210.429
9897	322		16	36	127	353	950	12	0	213.429
9898	288		6	99	353	569	659	15	4	243.571
9899	298		59883	128	115	195	466	6	0	8684.71
9900	472		5424	173	68	311	679	10	0	952.143
9901	314		287	39	60	57	222	1	0	95.1429
9902	459		3339	107	52	147	933	26	3	658.143
9903	176		461	191	41	123	290	7	1	159.143
9904	184		533	189	59	207	813	31	17	264.143
9905	240		4434	233	62	648	607	8	0	856
9906	311		1094	26	10	182	328	5	1	235.143
9907	433		1021	63	47	193	430	4	0	251.143
9908	527		3017	44	133	266	447	8	7	560.286
9909	435		22650	10	17	138	215	3	1	3290.57
9911	517		12	112	15	63	452	1	1	93.7143
9913	292		68	198	34	116	380	3	0	114.143
9915	511		9217	63	47	145	843	24	1	1477.14
9918	383		12	83	44	85	267	7	1	71.2857
9920	378		612	54	32	178	69	6	0	135.857
9921	499		35	8	64	260	320	3	0	98.5714
9924	450		5	14	28	127	351	17	2	77.7143
9927	810		37	10	64	222	297	6	0	90.8571
9928	542		90	70	127	243	533	1	1	152.143
9929	550		40001	6	10	49	98	5	0	5738.43
9930	562		53	10	30	115	211	3	1	60.4286
9931	395		2022	112	38	45	302	2	2	360.429
9933	682		5190	46	8	60	203	6	0	787.571
9934	493		36	99	111	226	660	19	6	165.286
9936	586		1	23	42	148	344	11	0	81.2857
9937	248		23779	73	20	252	606	6	0	3533.71
9938	392		7384	191	59	303	931	9	0	1268.14
9939	569		6602	59	44	244	711	3	1	1094.86
9940	408		1624	160	7	140	338	0	0	324.143
9941	491		334	72	21	169	225	4	0	117.857
9942	696		1941	112	314	350	591	6	0	473.429
9943	509		61	15	44	200	338	6	0	94.8571
9944	404		43	40	105	390	1069	7	0	236.286
9945	455		215	5	6	24	193	2	1	63.7143
9946	602		11742	42	33	207	687	5	3	1817
9947	712		406	44	10	104	139	12	0	102.143
9948	532		614	52	27	126	329	16	0	166.286
9949	431		3	60	21	83	598	2	1	109.714
9950	446		2331	47	48	216	363	3	3	430.143
9951	446		11253	25	12	63	356	7	1	1673.86
9952	497		149	5	11	39	189	8	0	57.2857
9953	380		26	26	21	75	363	28	2	77.2857
9954	372		8376	118	58	141	525	6	1	1317.86
9957	411		1843	35	35	112	637	8	10	382.857
9958	475		17	41	70	228	1160	20	11	221
9959	339		4486	30	21	48	195	0	0	682.857
9960	290		2765	5	31	101	157	5	0	437.714
9961	519		5380	43	138	359	573	17	0	930
9962	343		1022	64	5	10	413	0	0	216.286
9963	515		11368	93	17	127	216	6	0	1689.57
9964	499		2630	71	38	89	364	5	2	457
9965	725		109	28	47	177	486	7	0	122
9966	291		6870	84	31	173	544	6	2	1101.43
9967	396		35	9	45	149	141	2	0	54.4286
9968	368		118	190	33	280	402	3	0	146.571
9969	600		4509	50	61	256	1055	9	0	848.571
9970	365		1220	20	20	118	225	4	0	229.571
9972	322		2372	136	50	271	550	7	1	483.857
9973	203		1142	4	2	8	66	9	0	175.857
9976	456		3195	74	79	199	521	22	0	584.286
9979	312		3790	117	34	118	321	1	0	625.857
9980	318		4911	245	70	406	571	17	0	888.571
9981	363		69345	149	39	269	312	4	0	10016.9
9982	417		43560	72	56	250	332	7	0	6325.29
9983	355		277	169	97	291	625	6	0	209.286
9984	437		35436	63	57	208	442	5	0	5173
9985	1041		6	0	0	20	109	7	4	20.8571
9987	473		36	122	43	174	550	15	0	134.286
9988	339		162	587	73	181	2913	20	0	562.286
9989	272		50911	97	80	292	486	13	0	7411.29
9990	497		21	20	24	81	89	10	0	35
9991	340		24	102	3	30	473	0	0	90.2857
9992	595		61	156	119	278	1366	5	0	283.571
9993	600		856	62	40	147	451	7	1	223.429
9995	251		107	8	25	135	188	3	0	66.5714
9996	858		42	10	17	29	246	3	0	49.5714
9997	301		52	410	59	376	1184	18	1	300
9998	754		164	16	33	74	310	0	0	85.2857
9999	307		3405	52	19	65	286	15	3	549.286
10000	639		48569	102	39	222	577	3	0	7073.14
10001	316		4998	97	17	220	1105	10	1	921.143
10002	462		7738	134	15	144	780	6	1	1259.71
10006	378		6469	203	28	64	272	5	0	1005.86
10008	470		1466	4	8	19	131	0	0	232.571
10009	479		5717	100	104	181	602	10	1	959.286
10010	520		2234	62	44	113	510	23	3	427
10011	696		7502	18	78	263	626	5	2	1213.43
10012	371		95	68	153	147	1142	19	1	232.143
10013	430		49	586	223	403	3191	24	4	640
10014	456		34308	224	181	193	780	6	1	5099
10015	855		543	66	65	191	1013	20	5	271.857
10016	280		794	33	32	217	312	8	0	199.429
10017	497		5625	16	34	62	256	6	3	857.429
10018	324		35	277	48	353	654	25	0	198.857
10019	517		160	60	16	109	432	2	1	111.429
10020	305		2847	582	63	307	716	1	0	645.143
10021	250		281	39	17	88	435	7	2	124.143
10022	325		98	68	38	208	343	5	1	108.714
10023	404		7995	24	57	289	373	5	1	1249.14
10024	396		1381	127	76	98	777	1	1	351.571
10026	187		386	169	49	113	507	0	0	174.857

## Sheet: At3g30210
accession ID	AT3G30210		AT1G52830	AT1G29460	AT1G29440	AT1G29500	AT1G29510	AT2G18010	AT4G36110	AT4G14819	AT5G18010	AT5G18080
108	0		188	65	105	39	44	0	85	2	138	20
139	2		254	686	660	259	286	65	81	5	788	562
159	1		46	250	330	67	166	15	90	0	0	193
265	0		73	193	250	80	208	44	99	59	32	499
350	0		82	427	1108	553	690	74	48	22	99	587
351	0		46	292	602	440	357	38	64	25	36	533
403	1		231	249	426	209	471	66	44	44	63	271
410	1		221	139	150	122	146	63	76	6	11	187
424	1		187	60	146	121	80	23	64	6	6	132
428	1		211	99	51	147	143	32	56	12	69	97
506	0		47	320	160	450	573	25	69	0	96	509
630	0		317	470	169	502	576	72	212	5	115	662
687	1		93	482	218	563	626	35	96	3	123	731
728	0		224	716	361	847	1066	78	203	5	231	949
763	1		24	118	196	241	151	3	49	8	12	53
768	1		30	136	91	173	203	17	84	13	52	169
801	2		66	207	174	1	51	23	52	13	0	162
870	2		209	358	132	416	492	63	149	5	80	430
915	0		55	315	808	373	425	36	38	13	65	333
932	3		113	66	45	28	49	42	138	27	8	167
997	0		138	149	182	50	150	6	97	12	9	303
1002	0		261	274	437	85	74	15	139	22	45	273
1066	0		145	194	319	126	241	26	102	17	34	370
1158	0		143	125	160	72	128	14	130	7	30	166
1317	0		522	315	467	202	424	21	95	24	65	589
1435	1		6	60	100	82	115	8	5	3	52	84
1684	4		26	373	175	709	864	17	33	8	142	606
1741	0		18	272	117	376	521	9	32	4	90	387
1829	0		91	278	153	370	523	24	64	10	0	299
1872	5		21	157	255	383	518	17	34	0	112	163
1890	3		2	121	132	161	186	5	27	3	44	73
1925	4		21	179	312	312	448	11	49	2	141	181
1954	4		14	150	80	251	468	9	38	10	96	123
2016	2		9	80	161	278	339	2	24	5	74	83
2017	3		32	266	140	494	697	17	46	13	80	406
2031	2		8	113	84	342	577	3	19	1	38	183
2171	2		30	262	565	327	325	20	45	5	59	258
2202	0		116	211	347	351	361	8	53	8	139	189
2212	2		111	342	166	413	577	37	65	10	107	460
2276	1		167	338	156	403	521	37	60	7	59	392
2278	1		22	123	113	353	520	6	24	3	29	159
2317	1		58	368	508	358	289	21	53	11	43	334
2370	0		176	380	202	589	651	67	85	16	116	519
4779	0		62	244	91	392	352	27	48	68	40	366
4807	2		362	496	430	207	435	81	60	10	154	678
4826	1		223	257	274	153	308	33	65	92	76	560
4884	1		169	191	345	213	183	26	42	23	37	220
4931	0		18	101	186	247	284	8	21	3	23	67
4939	0		26	279	314	444	521	10	42	27	72	458
4958	0		123	211	114	296	351	32	68	20	54	309
5023	0		172	300	274	399	412	12	51	10	69	495
5104	0		17	312	475	343	337	25	42	4	14	384
5151	2		129	327	358	326	346	63	101	11	64	580
5210	2		6	84	56	189	262	3	30	14	14	123
5236	0		11	183	177	253	254	1	42	14	25	155
5276	2		92	30	140	84	140	2	60	1	24	49
5279	0		87	351	350	400	450	25	36	4	86	381
5349	0		16	208	425	320	441	52	78	6	22	321
5353	0		138	48	103	182	137	11	112	27	12	197
5395	1		21	97	43	45	214	6	41	23	33	116
5486	2		77	324	597	363	324	40	56	9	12	363
5535	0		230	516	153	635	528	109	131	19	136	874
5577	0		90	115	34	154	185	6	38	21	34	222
5644	0		148	229	699	399	391	29	55	25	66	356
5717	7		0	238	454	206	287	2	31	3	94	287
5718	1		6	467	970	546	430	42	6	1	120	448
5720	3		243	153	141	250	196	15	55	12	28	289
5726	5		135	186	95	323	270	10	23	21	42	289
5741	0		198	671	1258	794	807	93	117	18	220	932
5748	3		106	143	108	192	146	13	28	18	87	162
5768	0		22	182	62	309	238	14	11	7	32	197
5772	4		444	449	551	560	401	118	77	32	62	759
5778	1		233	459	932	590	509	92	118	33	237	381
5779	1		198	393	497	226	667	125	102	24	126	563
5784	1		101	444	525	531	479	23	64	11	129	721
5798	1		183	355	321	467	426	41	51	53	120	518
5800	1		259	416	452	217	513	92	105	21	144	668
5811	0		184	317	275	385	329	68	64	33	86	438
5818	1		107	180	207	241	190	5	99	2	42	138
5822	1		281	53	38	69	59	86	150	24	2	110
5831	3		99	174	96	391	281	16	82	13	30	156
5837	3		194	337	414	163	336	38	104	30	251	433
5860	1		203	122	115	38	103	6	54	4	45	159
5874	1		478	52	17	26	50	43	65	39	14	79
5890	1		136	52	17	77	64	49	91	3	28	91
5893	0		42	142	128	217	78	16	37	13	41	94
5907	0		21	295	332	324	179	52	77	68	46	383
5921	0		27	188	185	222	120	21	64	16	68	107
5950	1		191	149	198	236	229	15	55	10	26	204
5984	0		60	413	394	401	173	48	143	15	119	349
5993	2		83	185	204	309	188	17	53	31	21	137
6008	1		67	233	33	92	137	16	37	16	58	145
6009	1		103	223	100	350	305	26	130	4	29	370
6017	0		213	249	317	273	315	16	106	6	31	318
6020	0		195	120	99	35	184	32	163	21	22	187
6024	0		239	157	128	40	127	14	107	11	40	222
6025	0		130	152	44	167	132	26	146	1	19	186
6038	0		25	70	66	67	80	9	58	3	9	164
6041	0		75	178	159	41	202	10	20	4	41	227
6064	2		241	337	222	84	241	89	111	33	149	369
6086	0		74	265	251	39	170	17	186	1	77	507
6097	0		250	121	32	240	240	8	74	6	9	159
6099	0		324	349	154	0	27	23	11	69	30	219
6106	0		200	215	257	214	246	9	77	3	43	247
6107	1		281	94	141	26	80	18	72	6	32	159
6108	0		318	241	68	363	315	9	37	12	63	457
6111	0		181	335	244	96	234	11	11	27	60	446
6133	0		100	173	142	57	129	12	32	6	25	229
6137	0		52	237	151	121	224	6	53	7	22	246
6138	4		241	92	118	144	177	6	46	11	16	112
6140	0		150	189	142	279	266	14	22	11	19	199
6145	0		18	229	161	260	282	24	83	24	26	229
6148	0		72	169	146	47	233	51	78	24	27	224
6154	0		89	273	71	209	270	34	54	1	50	307
6163	1		75	221	77	216	194	30	44	1	38	244
6166	0		136	111	46	147	101	14	82	11	8	143
6169	0		95	299	320	257	301	16	18	20	40	253
6171	1		193	116	252	375	198	7	25	63	12	121
6174	0		213	87	123	122	190	6	50	26	11	97
6177	2		114	182	206	184	226	15	41	36	14	195
6194	1		73	97	258	232	104	32	45	38	19	157
6195	0		49	285	183	290	146	21	49	47	49	237
6198	0		107	132	122	108	112	15	120	7	12	77
6201	2		22	94	74	153	118	15	23	21	25	80
6203	1		6	99	133	104	92	20	111	8	42	99
6217	0		183	55	55	46	54	16	47	3	17	141
6218	0		87	79	32	167	103	11	60	37	15	123
6220	0		120	191	167	207	188	44	89	16	31	344
6240	0		60	92	75	97	92	8	48	25	24	115
6241	0		102	144	127	219	174	34	68	16	67	225
6255	0		152	288	229	62	221	128	143	54	30	518
6268	6		592	312	568	365	244	34	53	16	27	440
6284	0		112	285	95	176	295	52	109	22	67	414
6296	0		14	300	292	362	183	50	63	8	88	448
6390	0		22	205	38	236	175	56	58	11	60	311
6424	0		123	77	51	35	126	27	47	13	22	126
6434	0		108	210	220	220	96	40	59	4	25	297
6445	0		30	147	189	226	133	5	26	13	13	105
6680	0		91	288	310	306	209	69	124	17	278	362
6709	1		11	50	74	43	243	1	31	3	0	74
6744	0		117	326	215	1	40	33	52	42	0	361
6830	1		142	279	429	559	437	44	45	3	134	244
6900	0		377	255	367	353	396	45	43	3	49	371
6906	0		50	125	39	159	130	5	27	21	31	85
6907	1		130	211	205	320	255	7	32	45	29	350
6908	0		65	329	310	155	403	75	78	17	6	421
6909	1		27	80	80	227	119	5	44	16	20	157
6911	2		384	29	15	91	78	11	116	2	16	89
6917	0		142	195	208	182	248	20	32	5	31	305
6923	1		280	409	169	468	584	66	87	13	125	621
6933	0		12	75	46	87	51	34	65	20	8	115
6937	0		41	172	116	216	136	24	126	10	11	140
6939	1		35	152	306	286	247	18	29	9	38	193
6943	1		127	277	131	410	434	30	80	13	43	312
6944	3		28	477	682	532	398	72	191	8	68	399
6957	2		83	314	250	341	159	51	33	8	42	347
6960	1		85	285	215	84	193	22	44	21	230	362
6966	2		55	473	805	521	360	47	38	23	0	350
6970	0		461	336	98	345	454	46	64	20	67	632
6971	2		498	438	397	253	484	62	94	20	27	740
6973	4		112	168	74	78	227	7	38	7	18	230
6974	1		58	221	73	117	236	61	111	25	86	208
6976	0		95	95	52	83	171	11	26	12	10	128
6979	0		140	499	475	215	309	93	74	31	105	844
6989	0		68	374	207	738	544	42	74	16	35	363
6992	0		50	171	32	212	239	28	74	6	14	179
7013	1		169	390	414	569	607	31	36	3	85	317
7028	1		14	190	530	600	281	3	14	18	24	184
7033	3		184	469	222	549	872	73	162	10	122	598
7058	3		34	72	98	105	152	5	40	14	12	98
7067	1		127	110	36	212	185	9	44	22	30	245
7094	3		43	238	642	305	505	22	42	3	99	244
7102	2		46	84	137	43	214	19	78	13	31	211
7103	1		168	392	110	381	375	10	32	35	65	276
7106	1		119	116	224	341	226	9	12	2	51	100
7107	0		109	577	809	601	420	20	7	9	41	392
7111	1		131	142	503	257	358	4	59	16	52	193
7119	0		104	146	87	204	188	7	113	16	4	133
7161	0		185	171	59	62	188	16	45	7	20	189
7164	0		155	160	128	167	176	10	82	22	49	265
7165	1		394	296	490	723	639	19	15	23	130	329
7167	1		26	275	392	488	413	66	186	18	85	407
7169	2		19	198	290	83	163	18	43	3	16	140
7186	0		246	125	147	85	161	13	32	24	0	26
7202	1		96	139	25	76	135	6	56	3	55	143
7218	1		70	159	199	220	164	15	62	8	14	111
7231	0		68	307	334	413	468	19	49	9	74	378
7244	1		42	204	714	497	605	10	12	3	24	111
7248	1		45	224	82	403	443	10	53	5	27	256
7250	0		148	248	373	604	268	15	31	34	49	397
7263	0		111	229	170	214	191	14	55	7	36	190
7282	1		25	118	191	164	198	6	86	7	62	55
7288	3		66	155	338	292	254	16	74	58	102	249
7296	19		3	88	19	190	252	2	6	26	6	80
7308	0		155	177	434	245	255	20	75	8	41	191
7316	0		104	338	115	253	329	55	55	5	51	395
7320	1		120	274	326	632	402	38	30	14	58	350
7322	1		284	26	28	39	33	23	72	4	11	46
7327	0		257	270	127	335	262	60	55	14	15	237
7328	1		547	34	24	20	23	36	61	10	5	131
7330	0		122	190	45	83	117	32	102	30	1	301
7346	1		0	204	250	288	247	45	55	20	53	360
7350	0		142	233	212	299	244	15	20	2	22	341
7353	1		223	248	83	383	409	65	89	46	69	344
7354	0		263	555	601	572	310	106	39	4	100	746
7355	0		73	235	66	81	155	35	119	12	27	410
7372	1		254	69	107	105	71	56	79	16	30	106
7373	10		104	122	312	165	168	12	65	9	0	180
7377	0		130	255	96	371	390	25	139	12	60	276
7384	2		304	223	258	7	73	16	15	4	55	326
7396	2		77	86	95	81	86	25	101	3	42	80
7404	0		393	419	618	507	582	99	88	11	83	607
7413	8		29	213	229	191	142	18	43	10	22	218
7418	0		124	214	104	0	17	51	134	9	0	187
7424	1		27	244	235	481	308	95	76	8	32	252
7427	0		60	178	305	321	222	53	131	19	9	305
7458	0		108	424	377	264	234	31	63	8	19	223
7461	2		21	176	181	184	101	15	28	15	41	170
7477	0		248	65	308	81	112	35	69	17	41	98
7515	2		85	351	156	422	585	33	102	11	62	427
7517	0		226	174	320	267	264	45	77	17	33	317
7521	0		109	93	110	227	151	84	78	12	10	202
7717	0		607	556	714	784	597	110	181	11	495	755
7917	0		43	102	24	155	125	65	143	15	58	156
8077	0		118	470	189	452	695	37	82	15	63	725
8132	6		128	258	465	287	279	24	66	10	82	208
8231	1		66	218	384	112	341	14	18	2	40	202
8233	3		47	166	100	362	575	11	57	11	37	241
8234	0		250	436	539	267	453	98	168	12	103	599
8235	1		85	141	135	192	120	12	25	11	53	122
8236	2		14	205	54	172	228	33	30	10	75	147
8238	3		448	427	475	466	577	202	86	16	108	601
8239	0		269	344	76	369	575	67	47	15	22	460
8244	1		656	470	362	437	384	142	241	36	120	656
8246	2		153	371	305	297	483	78	81	13	35	392
8247	0		72	197	161	179	233	19	35	4	40	218
8259	1		102	172	212	98	238	81	28	8	19	227
8264	0		412	13	15	71	61	24	49	3	14	68
8266	1		109	292	296	88	354	37	68	8	131	306
8275	0		34	250	67	248	232	50	44	15	0	203
8284	2		37	114	56	122	178	16	41	9	25	97
8290	1		106	137	121	220	190	9	33	11	37	227
8297	2		107	163	167	92	250	22	42	4	37	206
8325	0		64	142	256	316	166	26	86	0	31	176
8334	2		165	57	203	188	158	6	43	12	12	68
8337	0		118	231	204	105	204	18	51	5	32	312
8343	4		46	196	301	86	345	21	60	12	38	272
8351	4		151	116	175	151	208	6	66	17	35	217
8353	0		458	287	334	101	252	3	34	18	39	302
8357	2		39	202	107	201	137	19	93	4	17	307
8365	0		59	136	158	241	146	21	62	18	29	168
8366	4		79	291	449	435	318	30	12	15	201	309
8378	0		296	80	102	91	111	59	84	21	31	178
8386	0		107	125	45	55	132	7	37	3	43	87
8419	0		359	219	92	269	343	77	122	9	1	182
8424	0		81	204	54	323	355	59	137	13	78	265
8428	0		10	127	210	146	104	6	28	8	14	123
8430	3		28	90	164	164	187	10	25	5	24	97
8472	1		46	265	156	261	203	13	64	24	76	248
8584	0		99	99	32	203	182	6	40	13	34	179
9067	2		169	370	299	303	271	66	97	1	40	404
9075	2		494	493	549	558	528	171	165	12	92	573
9078	0		132	399	346	462	332	94	89	5	73	420
9079	0		88	226	79	254	257	23	96	17	40	294
9081	0		164	472	425	451	530	117	171	4	108	556
9084	0		679	436	420	497	425	95	93	23	41	594
9085	0		553	383	361	463	376	76	82	26	44	543
9089	1		254	359	350	155	369	76	122	16	78	531
9091	0		113	351	279	276	178	60	53	9	36	264
9095	3		247	217	157	91	173	56	58	6	39	296
9099	2		166	209	251	409	281	21	50	18	50	354
9100	4		349	30	50	20	53	21	128	4	9	83
9102	4		298	157	132	52	134	50	133	7	21	198
9103	1		174	136	146	121	153	55	103	10	36	200
9104	1		623	55	72	31	73	17	64	1	18	129
9105	0		76	135	113	34	124	21	31	12	26	146
9106	4		246	239	218	65	214	16	85	5	68	316
9111	2		150	143	144	59	122	60	115	11	16	190
9113	1		295	264	268	83	243	57	93	11	56	382
9114	8		102	200	148	52	161	27	127	2	16	252
9115	7		135	162	135	46	166	21	70	6	10	173
9121	4		72	251	291	304	316	96	147	9	113	238
9125	1		65	258	246	317	317	67	161	10	143	238
9128	3		228	333	381	426	495	116	202	31	205	401
9130	4		152	308	334	433	467	140	258	26	181	446
9131	2		51	303	299	310	447	65	146	10	143	350
9133	2		79	428	467	424	633	120	221	12	147	546
9134	2		82	371	348	408	484	129	192	9	160	361
9298	0		128	290	109	375	421	14	82	35	74	416
9312	2		307	418	511	702	665	39	63	4	64	535
9314	1		164	296	106	324	400	56	60	25	80	437
9321	0		277	167	171	166	236	12	17	16	21	229
9386	0		432	177	185	306	222	20	118	26	18	185
9388	0		380	166	153	220	181	12	42	22	15	215
9404	0		187	137	141	164	235	11	74	9	30	135
9405	1		10	175	147	193	276	14	30	1	29	211
9408	5		16	90	84	26	214	10	29	10	8	105
9409	0		10	91	108	30	115	7	16	2	38	108
9421	0		260	208	21	95	127	16	56	15	19	60
9433	0		76	142	126	58	144	20	34	27	42	141
9451	0		57	97	179	149	148	9	35	5	2	77
9503	2		74	237	192	178	221	12	41	7	26	284
9506	0		27	231	228	356	281	51	193	3	26	329
9507	0		325	136	85	34	90	22	45	42	16	368
9508	0		337	594	1088	158	483	32	83	22	97	644
9509	1		175	232	651	79	201	31	40	47	63	407
9510	1		107	147	224	248	146	17	47	56	62	192
9511	0		27	150	208	77	221	28	30	17	61	337
9512	0		91	131	217	229	150	10	25	13	13	191
9513	0		63	115	233	115	91	20	43	31	98	208
9514	0		81	167	291	318	151	9	31	20	149	282
9515	0		55	132	253	177	134	45	29	13	18	211
9516	1		60	109	202	219	138	29	56	46	42	279
9517	1		21	118	33	47	149	8	8	18	20	199
9518	0		88	237	102	279	248	99	80	22	66	603
9519	0		138	387	386	157	433	103	27	15	127	641
9520	0		100	235	255	132	285	35	59	26	131	452
9521	0		28	150	229	88	156	14	37	21	40	263
9522	1		185	121	331	301	273	43	55	27	63	374
9523	0		185	122	144	39	133	23	99	31	28	414
9524	0		520	282	301	107	223	51	54	14	62	608
9525	0		147	322	60	358	348	83	66	3	25	441
9526	0		188	179	92	367	427	21	81	96	19	213
9527	0		170	233	232	51	171	8	70	20	92	375
9529	4		76	255	250	277	190	79	88	65	51	503
9530	0		133	90	81	150	112	21	73	16	13	332
9531	0		51	288	245	184	224	16	51	45	40	481
9532	0		37	143	233	59	143	3	104	13	43	235
9533	0		94	211	124	41	493	30	83	18	39	192
9534	0		37	77	102	165	112	17	93	5	8	120
9535	0		415	184	40	219	240	12	144	21	45	437
9537	0		115	207	225	355	236	21	26	24	57	345
9538	0		35	224	163	213	252	31	106	10	43	238
9540	0		105	150	179	201	169	14	50	19	43	296
9541	1		113	135	169	57	146	5	98	9	29	440
9542	1		130	195	124	65	449	35	163	53	39	198
9543	1		135	98	1	276	228	13	56	34	48	264
9544	0		165	129	169	80	71	17	84	43	21	212
9545	1		327	157	297	45	94	12	28	32	52	153
9546	0		79	106	28	265	146	10	102	23	9	207
9547	0		199	195	148	225	176	18	7	14	7	228
9548	0		269	250	217	294	222	10	17	24	30	303
9549	0		171	264	700	110	198	23	95	7	21	41
9550	0		66	109	212	154	117	41	73	14	9	116
9551	0		75	80	18	20	97	8	67	36	49	152
9552	1		24	85	150	40	114	16	111	8	61	212
9553	1		39	104	197	31	99	14	35	5	37	234
9554	1		79	383	454	67	139	12	71	29	103	372
9556	0		129	96	55	204	143	33	80	0	13	213
9557	0		138	147	81	216	202	19	75	38	47	253
9558	0		77	198	221	132	267	22	122	4	61	341
9559	0		250	314	456	53	52	51	93	14	44	424
9560	3		164	218	224	176	291	39	43	1	64	337
9561	0		213	226	205	114	256	17	76	18	119	654
9562	0		66	353	277	698	331	62	94	7	95	763
9563	1		160	224	242	327	329	6	95	9	132	341
9564	0		214	257	77	485	498	59	71	14	43	381
9565	1		124	235	238	65	242	85	33	7	85	407
9566	0		69	304	71	101	290	36	27	16	70	452
9567	0		190	260	141	460	280	34	35	25	74	428
9568	0		254	409	357	128	425	107	97	12	51	722
9569	1		49	187	204	330	299	55	208	15	75	381
9570	0		119	162	100	191	128	30	50	33	57	339
9572	0		67	387	91	482	400	39	90	30	103	687
9573	2		31	134	33	206	108	9	117	18	24	249
9574	7		101	235	479	193	409	52	84	37	61	506
9575	0		28	199	67	108	228	29	36	60	30	351
9576	0		80	194	312	90	219	41	53	59	96	503
9577	4		181	188	176	287	239	39	94	28	30	307
9578	0		28	123	256	244	173	16	43	49	64	180
9579	0		199	195	37	67	202	35	83	45	30	317
9580	0		133	144	249	56	156	17	30	29	101	192
9581	0		252	160	59	245	196	16	65	9	22	244
9582	2		104	180	172	372	203	41	153	43	44	305
9583	0		53	106	83	241	333	47	117	11	122	209
9584	0		199	300	55	151	360	35	39	15	70	627
9585	0		84	283	71	355	306	66	36	16	77	552
9586	1		258	378	594	445	139	25	94	21	56	301
9587	0		426	217	126	133	284	0	110	17	12	355
9588	0		98	247	191	444	576	44	91	87	29	336
9590	0		100	117	82	14	44	10	75	4	9	183
9591	1		126	148	114	46	174	34	75	29	60	333
9592	0		203	281	109	192	339	92	154	16	20	461
9593	0		75	170	130	231	226	16	45	48	106	369
9594	0		113	146	94	243	190	24	96	18	26	334
9595	0		166	458	264	141	366	47	61	13	146	427
9596	0		100	495	624	114	346	28	91	16	119	691
9597	0		176	155	309	123	187	12	13	30	49	442
9598	0		338	357	815	132	225	16	91	28	160	318
9599	0		110	84	219	48	141	4	73	4	0	235
9600	0		339	296	405	60	166	49	135	18	158	242
9601	0		71	179	198	295	195	53	76	2	28	233
9602	0		183	312	510	475	402	113	184	28	141	523
9606	3		17	285	255	292	238	25	20	29	90	525
9607	2		30	181	164	186	210	45	71	6	61	198
9608	0		25	322	425	366	262	16	33	36	98	315
9609	2		62	210	191	302	240	21	66	39	86	232
9610	1		10	223	281	550	406	32	74	6	109	218
9611	0		57	440	224	547	272	30	77	75	114	437
9612	1		14	247	199	331	181	26	118	12	173	254
9613	0		84	152	111	187	168	13	44	4	23	165
9615	0		47	205	287	261	271	8	64	6	42	109
9616	1		27	284	318	328	300	20	59	15	94	283
9617	1		61	244	191	79	161	35	50	12	61	234
9619	0		69	204	179	65	189	24	41	15	39	294
9620	1		91	238	247	78	199	26	56	22	116	340
9621	1		277	244	186	102	184	28	74	10	185	350
9622	1		11	240	100	115	258	13	47	17	52	257
9623	1		30	150	95	259	197	8	21	28	47	145
9624	0		233	150	85	155	144	11	107	11	80	207
9626	0		38	189	179	368	220	16	67	40	32	200
9627	0		76	241	195	307	293	38	80	11	112	365
9628	3		17	167	205	386	399	10	58	7	120	112
9629	1		130	216	172	409	253	13	66	34	150	201
9630	0		93	80	21	210	131	1	33	16	70	132
9631	0		38	204	100	299	182	8	50	47	35	239
9632	4		26	93	45	59	104	4	25	0	12	101
9633	0		95	211	76	57	124	25	77	24	83	245
9634	0		35	224	71	42	126	18	48	48	24	342
9636	0		45	103	27	31	93	12	57	27	34	167
9637	1		105	109	39	53	94	28	61	9	64	164
9638	0		44	117	85	39	79	15	51	18	53	170
9639	0		42	209	47	78	173	75	81	65	106	390
9640	2		32	172	33	51	155	21	56	41	69	296
9642	1		168	136	19	62	112	40	72	32	64	317
9644	0		302	174	185	181	228	18	52	11	34	222
9645	0		22	276	240	107	300	16	80	10	23	293
9646	2		63	177	52	85	233	11	62	6	29	278
9647	3		23	412	233	460	358	34	68	50	39	350
9648	0		142	334	355	329	226	29	75	15	63	347
9649	0		64	373	128	135	268	131	111	50	37	377
9650	0		58	72	83	94	162	6	48	4	52	160
9651	0		53	122	11	76	104	2	30	9	54	107
9652	0		86	167	98	53	104	17	45	44	29	199
9653	0		53	235	209	274	221	14	81	12	55	316
9654	0		15	290	62	273	212	27	72	20	1	497
9655	1		84	245	339	368	290	44	66	15	48	402
9656	2		133	264	274	429	304	27	187	19	60	441
9658	0		148	324	76	167	248	29	76	61	77	392
9659	0		12	287	176	71	176	42	36	48	37	453
9660	0		170	206	288	78	205	28	27	15	12	341
9661	0		93	179	26	64	144	6	43	52	55	287
9662	1		65	101	94	193	169	16	92	8	28	103
9663	1		30	8	62	50	84	0	24	0	7	11
9665	0		16	163	137	71	73	20	54	7	33	122
9666	1		49	321	384	331	249	26	16	17	33	415
9668	1		34	171	161	219	141	17	43	16	23	148
9669	0		48	65	86	152	116	3	59	8	8	133
9673	3		44	96	82	119	107	14	72	1	16	110
9678	0		43	207	179	71	174	25	64	7	23	213
9679	0		84	186	193	243	178	35	72	11	65	246
9680	0		83	230	263	270	225	37	87	16	82	305
9681	2		110	209	195	248	197	32	51	10	68	264
9682	0		111	99	56	174	100	6	57	0	34	130
9683	0		84	179	192	245	164	20	66	8	58	215
9684	0		5	276	296	353	471	21	57	13	67	127
9690	0		453	207	218	422	249	15	66	3	31	291
9693	6		76	170	79	200	180	19	48	12	27	224
9696	0		67	156	142	192	197	14	72	6	20	256
9697	0		124	227	170	69	153	17	70	27	60	246
9698	1		199	230	195	322	243	30	181	21	2	300
9699	1		188	273	82	97	333	42	61	4	42	262
9701	9		164	142	236	219	163	27	69	20	30	206
9702	0		73	219	186	64	143	22	54	26	8	286
9703	3		16	234	136	70	124	34	66	19	46	398
9704	0		117	383	143	108	323	65	142	14	57	513
9705	0		107	158	53	49	132	11	41	2	41	226
9706	1		19	208	174	127	344	45	36	1	51	252
9707	0		48	133	48	208	167	15	122	9	61	216
9708	9		32	37	53	65	55	3	41	6	4	19
9709	0		66	216	48	313	319	20	10	8	44	298
9710	1		91	191	231	327	237	14	36	9	45	263
9711	2		20	71	26	151	141	2	34	5	12	68
9712	1		98	266	241	348	165	24	45	20	54	421
9713	2		141	310	265	341	223	17	27	20	57	424
9714	2		33	137	154	42	144	13	19	6	61	184
9717	7		48	84	223	175	175	9	61	6	19	161
9719	0		107	243	188	128	179	72	46	24	152	331
9720	1		121	222	208	265	245	26	51	21	64	340
9721	3		102	216	320	260	255	15	22	7	40	269
9722	0		120	60	86	18	125	5	62	4	3	96
9723	0		8	399	270	278	194	7	18	19	11	321
9725	1		80	81	143	156	198	6	25	5	31	141
9726	1		17	253	239	304	290	34	16	18	66	309
9727	1		57	317	54	350	231	75	85	76	115	578
9728	0		185	279	283	392	163	57	12	43	73	328
9729	4		116	338	453	359	392	25	67	9	39	490
9730	8		20	52	71	73	55	11	69	6	3	92
9731	1		56	177	294	249	208	13	44	11	95	138
9732	1		124	70	111	109	79	8	52	4	11	97
9733	0		223	219	40	253	242	35	22	7	128	157
9734	1		86	225	248	398	345	6	39	31	52	294
9735	1		68	151	174	144	126	10	44	4	14	192
9736	2		190	248	203	371	212	40	66	22	63	348
9737	1		202	382	354	421	198	78	91	24	98	591
9738	1		94	169	21	182	191	40	45	23	39	324
9739	0		116	255	43	338	305	63	115	22	82	536
9741	2		59	136	159	189	157	13	71	5	45	95
9742	0		28	313	267	95	254	54	62	32	95	333
9743	1		115	61	118	150	164	4	10	5	16	113
9744	0		89	325	328	261	166	17	34	34	45	354
9745	1		52	203	156	291	225	35	110	19	101	244
9746	0		113	130	30	109	217	18	70	8	27	181
9747	3		147	363	138	190	335	33	64	9	97	455
9748	0		147	336	243	362	222	34	67	38	147	541
9749	0		27	362	65	134	267	137	99	26	1	465
9754	0		51	230	243	342	312	42	106	13	106	215
9755	0		60	203	154	484	220	37	151	23	43	315
9756	0		100	157	172	178	191	12	42	21	24	210
9757	7		71	79	31	90	82	4	66	33	17	61
9759	0		21	189	164	51	189	9	57	36	34	283
9762	2		223	61	84	104	96	16	46	9	14	124
9768	1		36	211	58	318	409	10	113	5	135	270
9769	1		31	139	64	168	181	0	0	24	17	190
9770	1		107	306	151	435	403	44	49	38	131	227
9771	0		58	211	307	408	379	15	30	1	116	220
9772	1		17	171	101	247	471	15	81	27	51	248
9774	0		67	239	232	408	314	29	55	25	39	277
9775	0		63	253	161	165	185	45	132	3	100	311
9776	1		90	223	161	254	259	20	49	9	50	331
9777	1		9	244	205	124	316	18	38	19	182	230
9778	5		19	90	338	165	230	16	24	10	28	135
9779	0		209	317	270	442	418	45	106	19	141	463
9780	0		200	203	33	276	246	12	93	5	15	195
9781	1		77	229	347	485	224	41	76	18	76	339
9782	1		108	151	235	264	167	21	102	7	101	291
9783	1		99	306	457	550	303	84	239	13	65	466
9784	3		63	148	237	191	214	9	34	17	85	199
9785	1		20	102	43	203	199	12	30	13	8	155
9786	1		45	255	177	387	270	39	111	30	107	324
9788	1		28	152	86	290	267	23	64	20	171	172
9789	1		569	324	188	637	489	21	28	6	98	444
9790	4		45	195	196	84	215	0	20	7	64	93
9791	0		388	186	71	495	345	15	53	3	0	243
9792	1		28	220	265	335	181	22	100	15	0	365
9793	1		37	238	212	119	397	14	9	27	165	269
9794	0		72	330	395	437	275	28	71	3	49	304
9795	1		83	222	58	453	276	46	80	18	101	276
9796	0		91	295	550	318	303	28	100	6	166	363
9797	1		195	173	166	345	324	14	10	8	26	129
9798	0		179	93	129	344	266	9	19	14	25	104
9799	0		100	172	91	257	187	13	65	10	89	146
9800	0		34	225	415	236	428	15	21	8	225	197
9801	1		45	91	52	324	203	7	48	12	60	103
9802	1		91	275	284	511	203	12	20	58	213	275
9803	1		80	146	176	307	150	35	145	11	16	410
9804	1		168	306	114	592	389	88	103	7	66	361
9805	1		135	183	36	315	185	9	86	19	92	176
9806	0		50	318	51	458	271	0	21	5	41	191
9807	1		69	250	128	568	442	31	65	5	222	282
9808	0		37	222	101	300	276	46	98	21	214	276
9809	1		75	264	130	448	370	27	126	19	16	258
9811	2		43	257	167	274	183	14	50	11	0	329
9812	0		110	208	164	220	175	29	174	5	93	221
9813	0		129	223	285	292	154	11	92	17	160	313
9814	0		148	148	148	186	127	23	36	3	137	209
9815	2		174	206	180	267	206	28	176	14	12	360
9816	1		68	238	297	503	257	41	155	23	146	524
9817	1		496	145	203	66	154	4	21	7	16	212
9819	0		157	89	92	10	41	0	48	0	18	115
9821	0		176	146	120	86	181	5	6	55	14	256
9823	0		247	71	32	32	49	0	24	26	6	136
9824	0		39	195	25	155	169	14	48	5	56	209
9825	0		172	113	119	47	144	8	44	4	33	164
9826	0		413	187	268	93	260	1	53	1	40	210
9827	0		22	91	72	10	75	9	71	9	23	233
9828	0		40	65	27	18	40	1	28	1	7	26
9829	1		19	36	80	13	80	1	13	2	12	40
9830	0		51	342	330	472	395	30	85	23	121	352
9831	1		243	127	206	205	186	11	52	12	22	171
9832	1		120	114	190	316	198	13	23	11	57	80
9833	2		44	155	77	74	282	21	10	8	16	174
9834	0		361	283	277	631	220	70	52	23	19	462
9835	1		62	158	123	208	153	28	70	11	16	85
9838	0		4	71	22	17	73	14	35	7	43	41
9839	2		211	109	145	95	84	3	57	7	29	123
9840	0		259	103	37	162	66	18	72	29	24	179
9841	0		158	338	446	390	322	114	24	3	63	403
9843	1		192	245	338	84	296	44	21	4	62	294
9844	0		191	219	339	368	297	2	5	16	59	295
9845	1		36	253	391	212	461	50	63	63	49	357
9846	0		294	260	390	530	328	21	24	18	80	483
9848	0		147	152	215	309	248	12	12	20	22	124
9849	1		44	196	212	102	360	128	100	4	51	318
9850	0		201	97	112	41	57	5	82	37	43	243
9851	0		79	117	41	44	86	50	80	10	19	272
9852	1		62	188	289	105	295	64	34	14	80	314
9853	2		108	222	262	258	156	29	67	18	1	645
9854	0		149	80	164	206	200	6	74	9	49	312
9855	1		172	140	139	24	148	28	49	11	68	357
9856	1		39	341	520	511	435	127	28	13	57	471
9858	0		97	227	230	81	192	31	64	1	58	314
9859	0		272	108	197	66	148	19	55	9	62	273
9860	0		176	105	73	155	97	3	30	31	21	96
9861	0		193	151	166	301	232	20	11	270	40	340
9862	0		90	138	69	244	339	10	23	9	30	260
9864	0		190	90	164	73	407	8	24	8	37	236
9866	0		87	81	139	75	79	30	66	7	60	252
9867	0		41	303	445	492	193	67	76	34	56	358
9868	2		24	89	29	128	189	10	45	15	21	156
9870	0		290	168	72	130	119	16	33	3	43	233
9871	1		11	95	50	223	208	6	49	5	57	133
9872	0		38	106	148	215	178	18	45	13	22	262
9873	0		291	168	179	99	238	16	45	17	68	265
9874	0		46	72	77	136	81	20	18	7	8	163
9875	2		196	162	229	307	208	9	44	68	55	255
9876	0		180	103	22	221	202	21	56	0	100	369
9877	1		5	242	383	60	150	9	46	11	30	181
9878	25		125	163	300	121	260	22	44	78	32	218
9879	1		374	176	302	490	169	5	30	14	5	113
9880	0		51	147	23	101	112	7	71	8	22	19
9881	2		150	115	154	29	167	14	39	38	30	165
9882	2		163	192	153	437	162	5	61	17	104	344
9883	0		87	177	236	120	291	10	14	28	40	274
9885	0		50	189	305	166	218	33	35	82	19	296
9886	0		44	300	259	698	315	65	82	37	65	447
9888	2		114	450	162	206	294	109	42	2	61	443
9890	1		38	218	357	66	120	21	119	31	26	173
9891	1		128	417	403	260	886	203	157	4	53	520
9892	2		52	361	88	106	239	29	46	31	91	598
9893	1		107	376	601	701	391	24	39	11	61	436
9894	1		70	270	414	384	280	43	73	25	35	200
9895	2		280	356	130	397	187	69	135	12	36	373
9897	0		36	333	108	112	375	74	186	18	95	519
9898	3		99	339	329	164	337	27	75	12	41	489
9899	0		128	168	119	217	145	18	35	8	21	160
9900	0		173	273	331	320	303	64	67	29	171	568
9901	4		39	95	48	32	123	6	17	0	10	41
9902	2		107	235	167	80	214	45	73	39	38	327
9903	0		191	130	111	42	102	6	39	51	33	256
9904	0		189	301	372	318	225	39	88	21	33	510
9905	0		233	541	397	294	573	52	59	2	49	577
9906	0		26	174	83	178	250	8	20	1	32	174
9907	2		63	149	374	235	225	13	51	7	72	172
9908	0		44	218	264	170	262	52	148	16	95	252
9909	1		10	107	257	189	278	5	21	6	9	78
9911	0		112	94	39	303	122	23	140	2	36	246
9913	0		198	62	44	48	75	18	56	10	22	180
9915	0		63	222	171	74	189	26	95	25	18	378
9918	4		83	104	133	60	156	12	25	11	39	187
9920	0		54	130	186	60	233	5	17	32	9	179
9921	3		8	244	178	156	269	7	43	6	37	247
9924	1		14	176	109	137	180	10	92	5	45	208
9927	2		10	203	130	358	457	39	13	11	39	291
9928	1		70	212	435	211	306	34	35	17	55	255
9929	0		6	54	147	111	119	1	12	8	15	78
9930	6		10	152	298	96	233	10	47	7	45	193
9931	0		112	118	63	57	101	10	43	9	29	75
9933	0		46	100	106	162	158	2	28	3	40	117
9934	0		99	275	309	168	319	28	47	24	89	419
9936	16		23	175	346	254	329	22	41	14	44	198
9937	0		73	226	104	78	191	12	48	11	9	159
9938	5		191	296	294	414	338	19	44	39	48	291
9939	0		59	222	80	73	290	54	41	7	28	361
9940	4		160	83	147	39	125	7	8	14	33	99
9941	2		72	184	147	255	354	3	28	6	29	257
9942	1		112	330	171	533	420	48	43	29	60	454
9943	0		15	232	276	73	288	13	60	5	51	261
9944	0		40	385	779	575	275	33	21	49	213	400
9945	1		5	58	46	22	81	7	18	3	13	128
9946	3		42	141	227	129	278	17	65	13	50	346
9947	0		44	3	0	77	64	5	102	5	98	46
9948	0		52	72	76	36	98	16	75	7	22	99
9949	0		60	136	24	86	295	81	52	16	56	238
9950	1		47	244	469	325	335	10	61	5	52	433
9951	1		25	101	86	126	125	10	70	3	49	189
9952	6		5	68	73	137	208	0	60	6	14	71
9953	0		26	122	79	128	88	29	73	29	37	170
9954	11		118	166	168	70	197	24	58	6	34	241
9957	0		35	184	194	249	208	22	94	11	36	292
9958	0		41	349	234	392	293	51	118	9	51	525
9959	2		30	77	57	148	143	10	34	4	24	43
9960	0		5	135	186	211	208	6	26	4	47	112
9961	0		43	301	599	522	408	27	21	16	154	272
9962	0		64	1	31	13	28	2	27	2	9	30
9963	1		93	105	53	46	207	9	52	18	13	134
9964	0		71	164	115	209	257	7	60	3	40	326
9965	1		28	282	159	343	379	20	78	10	23	375
9966	0		84	248	98	268	288	29	33	1	25	238
9967	1		9	103	209	185	197	7	25	9	15	154
9968	3		190	131	135	147	300	8	46	8	11	127
9969	0		50	342	555	470	249	43	108	11	94	387
9970	0		20	73	89	143	167	12	29	6	48	104
9972	3		136	216	126	192	235	22	76	6	39	252
9973	1		4	24	20	13	10	2	58	1	3	39
9976	0		74	252	108	249	205	50	137	25	22	207
9979	0		117	189	103	218	145	11	37	5	65	193
9980	0		245	335	80	207	281	55	54	10	116	698
9981	4		149	191	273	211	176	27	28	20	40	269
9982	0		72	219	275	337	252	11	48	7	90	283
9983	0		169	290	288	94	292	38	106	24	101	489
9984	0		63	243	136	107	138	9	89	16	105	170
9985	27		0	24	31	34	128	9	32	23	0	33
9987	0		122	127	165	305	198	7	103	13	27	187
9988	3		587	227	253	96	245	92	135	17	126	243
9989	0		97	173	183	288	263	20	157	12	128	250
9990	1		20	73	89	12	104	2	17	1	14	102
9991	0		102	18	36	15	41	0	26	5	8	39
9992	0		156	370	374	124	433	124	121	8	107	508
9993	1		62	109	257	206	228	37	72	6	74	221
9995	0		8	83	53	166	157	7	31	13	16	117
9996	2		10	52	73	223	177	9	39	5	36	93
9997	0		410	279	55	370	368	27	32	13	0	400
9998	0		16	138	147	199	179	13	46	5	0	197
9999	1		52	141	122	86	84	10	20	5	87	128
10000	3		102	319	318	169	228	10	77	18	9	306
10001	1		97	222	57	327	392	18	108	3	0	317
10002	1		134	160	134	62	174	24	38	4	34	232
10006	0		203	162	57	268	213	6	108	20	36	216
10008	2		4	14	56	74	115	3	38	7	5	23
10009	2		100	234	201	351	322	37	112	17	84	243
10010	1		62	282	104	59	198	36	136	17	97	299
10011	2		18	323	340	322	405	48	82	7	75	293
10012	1		68	216	217	144	181	47	83	7	31	251
10013	2		586	540	666	491	414	153	269	20	125	676
10014	1		224	292	201	229	220	47	62	9	41	304
10015	5		66	298	274	417	445	56	83	18	111	272
10016	0		33	177	382	387	230	12	80	22	11	196
10017	3		16	100	213	167	180	5	74	7	61	61
10018	0		277	296	269	265	230	37	68	19	193	230
10019	0		60	175	82	231	195	10	79	3	33	101
10020	0		582	198	76	310	331	6	43	13	18	370
10021	0		39	128	185	330	203	12	60	44	0	213
10022	0		68	127	250	247	161	12	86	9	0	125
10023	0		24	233	296	103	276	26	83	38	48	444
10024	0		127	539	771	709	493	20	25	22	47	405
10026	0		169	349	169	72	215	52	83	33	7	706
				AT1G29460
				65
				686
				250
				193
				427
				292
				249
				139
				60
				99
				320
				470
				482
				716
				118
				136
				207
				358
				315
				66
				149
				274
				194
				125
				315
				60
				373
				272
				278
				157
				121
				179
				150
				80
				266
				113
				262
				211
				342
				338
				123
				368
				380
				244
				496
				257
				191
				101
				279
				211
				300
				312
				327
				84
				183
				30
				351
				208
				48
				97
				324
				516
				115
				229
				238
				467
				153
				186
				671
				143
				182
				449
				459
				393
				444
				355
				416
				317
				180
				53
				174
				337
				122
				52
				52
				142
				295
				188
				149
				413
				185
				233
				223
				249
				120
				157
				152
				70
				178
				337
				265
				121
				349
				215
				94
				241
				335
				173
				237
				92
				189
				229
				169
				273
				221
				111
				299
				116
				87
				182
				97
				285
				132
				94
				99
				55
				79
				191
				92
				144
				288
				312
				285
				300
				205
				77
				210
				147
				288
				50
				326
				279
				255
				125
				211
				329
				80
				29
				195
				409
				75
				172
				152
				277
				477
				314
				285
				473
				336
				438
				168
				221
				95
				499
				374
				171
				390
				190
				469
				72
				110
				238
				84
				392
				116
				577
				142
				146
				171
				160
				296
				275
				198
				125
				139
				159
				307
				204
				224
				248
				229
				118
				155
				88
				177
				338
				274
				26
				270
				34
				190
				204
				233
				248
				555
				235
				69
				122
				255
				223
				86
				419
				213
				214
				244
				178
				424
				176
				65
				351
				174
				93
				556
				102
				470
				258
				218
				166
				436
				141
				205
				427
				344
				470
				371
				197
				172
				13
				292
				250
				114
				137
				163
				142
				57
				231
				196
				116
				287
				202
				136
				291
				80
				125
				219
				204
				127
				90
				265
				99
				370
				493
				399
				226
				472
				436
				383
				359
				351
				217
				209
				30
				157
				136
				55
				135
				239
				143
				264
				200
				162
				251
				258
				333
				308
				303
				428
				371
				290
				418
				296
				167
				177
				166
				137
				175
				90
				91
				208
				142
				97
				237
				231
				136
				594
				232
				147
				150
				131
				115
				167
				132
				109
				118
				237
				387
				235
				150
				121
				122
				282
				322
				179
				233
				255
				90
				288
				143
				211
				77
				184
				207
				224
				150
				135
				195
				98
				129
				157
				106
				195
				250
				264
				109
				80
				85
				104
				383
				96
				147
				198
				314
				218
				226
				353
				224
				257
				235
				304
				260
				409
				187
				162
				387
				134
				235
				199
				194
				188
				123
				195
				144
				160
				180
				106
				300
				283
				378
				217
				247
				117
				148
				281
				170
				146
				458
				495
				155
				357
				84
				296
				179
				312
				285
				181
				322
				210
				223
				440
				247
				152
				205
				284
				244
				204
				238
				244
				240
				150
				150
				189
				241
				167
				216
				80
				204
				93
				211
				224
				103
				109
				117
				209
				172
				136
				174
				276
				177
				412
				334
				373
				72
				122
				167
				235
				290
				245
				264
				324
				287
				206
				179
				101
				8
				163
				321
				171
				65
				96
				207
				186
				230
				209
				99
				179
				276
				207
				170
				156
				227
				230
				273
				142
				219
				234
				383
				158
				208
				133
				37
				216
				191
				71
				266
				310
				137
				84
				243
				222
				216
				60
				399
				81
				253
				317
				279
				338
				52
				177
				70
				219
				225
				151
				248
				382
				169
				255
				136
				313
				61
				325
				203
				130
				363
				336
				362
				230
				203
				157
				79
				189
				61
				211
				139
				306
				211
				171
				239
				253
				223
				244
				90
				317
				203
				229
				151
				306
				148
				102
				255
				152
				324
				195
				186
				220
				238
				330
				222
				295
				173
				93
				172
				225
				91
				275
				146
				306
				183
				318
				250
				222
				264
				257
				208
				223
				148
				206
				238
				145
				89
				146
				71
				195
				113
				187
				91
				65
				36
				342
				127
				114
				155
				283
				158
				71
				109
				103
				338
				245
				219
				253
				260
				152
				196
				97
				117
				188
				222
				80
				140
				341
				227
				108
				105
				151
				138
				90
				81
				303
				89
				168
				95
				106
				168
				72
				162
				103
				242
				163
				176
				147
				115
				192
				177
				189
				300
				450
				218
				417
				361
				376
				270
				356
				333
				339
				168
				273
				95
				235
				130
				301
				541
				174
				149
				218
				107
				94
				62
				222
				104
				130
				244
				176
				203
				212
				54
				152
				118
				100
				275
				175
				226
				296
				222
				83
				184
				330
				232
				385
				58
				141
				3
				72
				136
				244
				101
				68
				122
				166
				184
				349
				77
				135
				301
				1
				105
				164
				282
				248
				103
				131
				342
				73
				216
				24
				252
				189
				335
				191
				219
				290
				243
				24
				127
				227
				173
				73
				18
				370
				109
				83
				52
				279
				138
				141
				319
				222
				160
				162
				14
				234
				282
				323
				216
				540
				292
				298
				177
				100
				296
				175
				198
				128
				127
				233
				539
				349
				AT1G29460
				65
				686
				250
				193
				427
				292
				249
				139
				60
				99
				320
				470
				482
				716
				118
				136
				207
				358
				315
				66
				149
				274
				194
				125
				315
				60
				373
				272
				278
				157
				121
				179
				150
				80
				266
				113
				262
				211
				342
				338
				123
				368
				380
				244
				496
				257
				191
				101
				279
				211
				300
				312
				327
				84
				183
				30
				351
				208
				48
				97
				324
				516
				115
				229
				238
				467
				153
				186
				671
				143
				182
				449
				459
				393
				444
				355
				416
				317
				180
				53
				174
				337
				122
				52
				52
				142
				295
				188
				149
				413
				185
				233
				223
				249
				120
				157
				152
				70
				178
				337
				265
				121
				349
				215
				94
				241
				335
				173
				237
				92
				189
				229
				169
				273
				221
				111
				299
				116
				87
				182
				97
				285
				132
				94
				99
				55
				79
				191
				92
				144
				288
				312
				285
				300
				205
				77
				210
				147
				288
				50
				326
				279
				255
				125
				211
				329
				80
				29
				195
				409
				75
				172
				152
				277
				477
				314
				285
				473
				336
				438
				168
				221
				95
				499
				374
				171
				390
				190
				469
				72
				110
				238
				84
				392
				116
				577
				142
				146
				171
				160
				296
				275
				198
				125
				139
				159
				307
				204
				224
				248
				229
				118
				155
				88
				177
				338
				274
				26
				270
				34
				190
				204
				233
				248
				555
				235
				69
				122
				255
				223
				86
				419
				213
				214
				244
				178
				424
				176
				65
				351
				174
				93
				556
				102
				470
				258
				218
				166
				436
				141
				205
				427
				344
				470
				371
				197
				172
				13
				292
				250
				114
				137
				163
				142
				57
				231
				196
				116
				287
				202
				136
				291
				80
				125
				219
				204
				127
				90
				265
				99
				370
				493
				399
				226
				472
				436
				383
				359
				351
				217
				209
				30
				157
				136
				55
				135
				239
				143
				264
				200
				162
				251
				258
				333
				308
				303
				428
				371
				290
				418
				296
				167
				177
				166
				137
				175
				90
				91
				208
				142
				97
				237
				231
				136
				594
				232
				147
				150
				131
				115
				167
				132
				109
				118
				237
				387
				235
				150
				121
				122
				282
				322
				179
				233
				255
				90
				288
				143
				211
				77
				184
				207
				224
				150
				135
				195
				98
				129
				157
				106
				195
				250
				264
				109
				80
				85
				104
				383
				96
				147
				198
				314
				218
				226
				353
				224
				257
				235
				304
				260
				409
				187
				162
				387
				134
				235
				199
				194
				188
				123
				195
				144
				160
				180
				106
				300
				283
				378
				217
				247
				117
				148
				281
				170
				146
				458
				495
				155
				357
				84
				296
				179
				312
				285
				181
				322
				210
				223
				440
				247
				152
				205
				284
				244
				204
				238
				244
				240
				150
				150
				189
				241
				167
				216
				80
				204
				93
				211
				224
				103
				109
				117
				209
				172
				136
				174
				276
				177
				412
				334
				373
				72
				122
				167
				235
				290
				245
				264
				324
				287
				206
				179
				101
				8
				163
				321
				171
				65
				96
				207
				186
				230
				209
				99
				179
				276
				207
				170
				156
				227
				230
				273
				142
				219
				234
				383
				158
				208
				133
				37
				216
				191
				71
				266
				310
				137
				84
				243
				222
				216
				60
				399
				81
				253
				317
				279
				338
				52
				177
				70
				219
				225
				151
				248
				382
				169
				255
				136
				313
				61
				325
				203
				130
				363
				336
				362
				230
				203
				157
				79
				189
				61
				211
				139
				306
				211
				171
				239
				253
				223
				244
				90
				317
				203
				229
				151
				306
				148
				102
				255
				152
				324
				195
				186
				220
				238
				330
				222
				295
				173
				93
				172
				225
[truncated: 44,592 more rows]

## Sheet: At1g74370
accession ID	AT1G74370		AT1G29460	AT1G29440	AT1G29490	AT1G29500	AT1G29510	AT3G23030	AT3G28857	AT3G03830	AT3G03820	AT3G15540	AT3G23635	AT4G38850	AT4G32280	AT4G13790	AT4G36110	AT4G14819	AT4G38825	AT5G18050	AT5G18060	AT5G47370	AT5G62280
108	618		65	105	0	39	44	3643	7	11	70	404	3	74	105	0	85	2	NOT AIVAILABLE	14	47	759	88
139	821		686	660	114	259	286	6616	34	307	673	1330	21	574	2929	6	81	5		291	689	4062	1317
159	552		250	330	60	67	166	2438	32	55	108	429	0	83	621	0	90	0		332	271	1487	1123
265	474		193	250	17	80	208	4386	105	48	115	1003	10	257	1215	0	99	59		207	284	2691	1487
350	750		427	1108	52	553	690	5879	38	127	521	639	15	250	835	1	48	22		330	538	3419	915
351	416		292	602	5	440	357	3887	17	76	148	517	12	149	812	0	64	25		324	283	3205	1262
403	646		249	426	30	209	471	3763	58	83	361	465	4	240	539	1	44	44		54	310	1722	443
410	523		139	150	48	122	146	6801	13	35	113	1141	4	90	1214	1	76	6		129	211	2445	1238
424	502		60	146	13	121	80	5920	12	25	82	1157	6	35	721	0	64	6		67	152	1914	821
428	442		99	51	10	147	143	7785	54	11	94	2197	10	57	1910	1	56	12		126	239	3174	1066
506	526		320	160	33	450	573	4851	23	27	331	689	8	322	692	4	69	0		77	188	3092	942
630	513		470	169	82	502	576	6183	21	227	548	2431	23	522	2207	2	212	5		151	335	5907	2437
687	616		482	218	39	563	626	4461	38	44	480	633	7	494	1078	0	96	3		108	253	2310	829
728	504		716	361	172	847	1066	6305	59	50	490	2177	16	452	2980	2	203	5		199	472	6217	2955
763	495		118	196	8	241	151	1945	13	13	80	225	4	93	49	0	49	8		0	6	1336	133
768	636		136	91	28	173	203	3606	61	14	184	770	3	275	822	3	84	13		229	287	1445	610
801	493		207	174	0	1	51	5119	19	11	198	429	2	98	244	3	52	13		195	170	796	366
870	628		358	132	87	416	492	4423	38	29	224	1712	22	278	1933	6	149	5		142	347	2847	1304
915	700		315	808	31	373	425	3546	24	50	282	484	7	157	933	2	38	13		208	328	2451	965
932	473		66	45	5	28	49	4529	41	4	46	1383	12	39	1150	1	138	27		50	126	2602	1251
997	584		149	182	23	50	150	3376	35	27	156	587	8	99	1535	0	97	12		304	415	916	338
1002	576		274	437	13	85	74	3588	23	45	358	534	2	173	441	0	139	22		278	400	543	140
1066	703		194	319	15	126	241	3490	17	81	449	356	3	193	513	1	102	17		254	464	1477	242
1158	529		125	160	40	72	128	3378	5	46	321	282	8	119	926	2	130	7		113	203	1391	268
1317	575		315	467	18	202	424	4047	24	62	433	627	1	258	771	0	95	24		82	348	569	167
1435	644		60	100	13	82	115	3451	1	14	115	315	2	57	156	0	5	3		65	35	973	748
1684	311		373	175	17	709	864	4599	31	20	304	483	10	152	1117	3	33	8		95	285	3267	1708
1741	698		272	117	11	376	521	3148	18	22	347	305	5	214	294	0	32	4		39	109	2011	395
1829	593		278	153	14	370	523	4266	14	18	255	522	9	174	570	1	64	10		263	304	2760	994
1872	326		157	255	4	383	518	2957	2	30	187	359	6	110	316	0	34	0		158	274	3328	1533
1890	610		121	132	7	161	186	2497	10	33	118	122	0	37	31	0	27	3		23	28	874	241
1925	438		179	312	1	312	448	3245	7	36	66	307	5	88	123	1	49	2		131	147	2091	958
1954	320		150	80	7	251	468	2123	6	21	47	356	1	81	263	2	38	10		149	139	2162	1110
2016	459		80	161	2	278	339	2727	2	29	21	193	1	30	92	0	24	5		37	45	1336	839
2017	402		266	140	25	494	697	3060	29	11	233	353	3	119	1244	1	46	13		73	141	3024	1149
2031	554		113	84	38	342	577	2444	6	3	104	266	2	54	455	7	19	1		37	81	3093	3196
2171	409		262	565	24	327	325	3933	6	60	130	512	5	174	343	0	45	5		140	223	2813	800
2202	673		211	347	4	351	361	3945	7	43	88	291	6	101	259	0	53	8		126	123	1831	770
2212	618		342	166	24	413	577	5306	43	25	275	790	13	238	1262	3	65	10		128	233	3519	1291
2276	566		338	156	20	403	521	4975	16	88	324	723	9	252	492	3	60	7		185	292	4056	771
2278	477		123	113	15	353	520	2323	8	5	81	197	1	97	129	0	24	3		13	36	2230	753
2317	567		368	508	29	358	289	4425	51	66	215	798	18	163	1943	2	53	11		231	455	2780	1455
2370	627		380	202	25	589	651	5175	49	51	352	1049	12	266	1495	4	85	16		161	404	2832	1266
4779	701		244	91	1	392	352	3686	42	96	233	522	7	176	1235	2	48	68		231	364	1496	306
4807	653		496	430	84	207	435	4925	52	200	525	1218	24	276	2248	9	60	10		215	481	3549	1259
4826	524		257	274	28	153	308	4656	47	108	504	974	14	356	1235	5	65	92		227	384	2780	498
4884	339		191	345	42	213	183	6512	77	56	147	1115	17	76	1725	7	42	23		60	120	3671	1767
4931	750		101	186	1	247	284	3673	11	38	135	313	1	103	42	0	21	3		26	61	1752	389
4939	268		279	314	1	444	521	2388	20	49	192	306	3	195	437	1	42	27		59	129	2498	507
4958	586		211	114	24	296	351	3892	31	85	230	645	4	164	591	4	68	20		144	177	1994	686
5023	368		300	274	4	399	412	2518	13	25	50	340	2	246	325	0	51	10		41	140	2225	420
5104	551		312	475	22	343	337	4621	17	85	369	560	5	183	378	3	42	4		137	132	3324	752
5151	583		327	358	29	326	346	5099	17	86	369	720	6	329	477	12	101	11		261	319	3102	612
5210	345		84	56	4	189	262	1983	3	8	46	204	3	28	148	0	30	14		7	22	1432	691
5236	428		183	177	0	253	254	4357	11	49	136	271	3	110	72	0	42	14		14	47	1859	611
5276	506		30	140	1	84	140	4870	4	11	50	632	1	17	82	0	60	1		4	41	815	197
5279	478		351	350	0	400	450	4607	20	92	321	610	7	193	630	1	36	4		66	128	3352	880
5349	369		208	425	30	320	441	2796	11	51	151	686	4	162	619	1	78	6		185	306	3755	1101
5353	414		48	103	0	182	137	2636	33	4	133	388	5	71	389	0	112	27		38	72	770	92
5395	552		97	43	2	45	214	2574	7	15	67	78	3	38	256	1	41	23		66	85	920	229
5486	534		324	597	23	363	324	3224	41	72	242	561	10	182	936	3	56	9		232	265	3006	1379
5535	538		516	153	19	635	528	4982	84	196	472	1836	18	411	3523	9	131	19		270	503	3816	1988
5577	485		115	34	2	154	185	1538	19	24	78	295	5	131	669	2	38	21		44	118	966	103
5644	536		229	699	45	399	391	3220	30	51	264	793	9	192	897	2	55	25		196	292	1904	420
5717	359		238	454	0	206	287	1578	20	30	134	181	4	64	295	0	31	3		126	259	1388	506
5718	697		467	970	43	546	430	4654	27	237	461	648	5	221	1272	0	6	1		324	414	2748	1338
5720	534		153	141	2	250	196	8301	20	130	183	590	8	70	806	0	55	12		132	185	1805	700
5726	567		186	95	0	323	270	8628	11	47	208	531	7	58	980	1	23	21		46	103	1608	704
5741	737		671	1258	58	794	807	5289	44	169	431	1021	32	438	2189	4	117	18		1154	1700	2749	1295
5748	455		143	108	10	192	146	7837	30	41	93	455	6	69	932	0	28	18		164	244	1657	594
5768	764		182	62	0	309	238	1857	22	7	187	188	7	91	327	1	11	7		140	218	1108	182
5772	526		449	551	73	560	401	4266	107	199	516	2594	22	267	3610	10	77	32		924	874	3580	1526
5778	582		459	932	99	590	509	6317	35	193	354	2039	30	224	2354	1	118	33		525	501	4658	3653
5779	509		393	497	74	226	667	6340	89	142	308	1571	23	363	1767	7	102	24		144	353	4454	2820
5784	570		444	525	187	531	479	3709	54	86	373	931	5	246	2524	1	64	11		202	382	2783	1009
5798	561		355	321	5	467	426	3694	63	115	256	974	9	273	1268	4	51	53		77	199	3229	1107
5800	636		416	452	65	217	513	4693	60	173	507	1495	29	491	2164	1	105	21		147	309	4642	1544
5811	601		317	275	69	385	329	4405	101	103	256	1453	15	273	3100	1	64	33		400	574	2996	1237
5818	562		180	207	15	241	190	3021	12	46	116	471	1	62	605	0	99	2		201	148	1262	1070
5822	440		53	38	28	69	59	6136	35	56	38	1251	24	34	3137	1	150	24		109	236	2560	2621
5831	580		174	96	28	391	281	3451	19	24	240	587	5	175	1016	5	82	13		249	267	1619	405
5837	544		337	414	27	163	336	4864	37	85	489	696	10	231	1507	2	104	30		573	803	2063	1057
5860	479		122	115	12	38	103	2181	8	21	103	237	1	138	352	0	54	4		17	100	1132	475
5874	540		52	17	14	26	50	9623	32	14	44	1803	12	74	1925	0	65	39		12	50	2634	1282
5890	576		52	17	44	77	64	8526	25	14	62	2372	5	72	2155	2	91	3		76	129	3620	2324
5893	423		142	128	6	217	78	1773	28	21	69	237	4	133	332	1	37	13		119	154	893	526
5907	646		295	332	15	324	179	2957	29	76	167	246	6	164	1368	2	77	68		216	507	1354	1046
5921	544		188	185	5	222	120	2199	23	17	90	202	1	154	1066	0	64	16		153	191	814	550
5950	660		149	198	3	236	229	2461	24	30	167	222	3	111	625	0	55	10		143	241	1020	329
5984	664		413	394	11	401	173	4979	21	44	220	492	10	217	1875	0	143	15		303	476	1222	901
5993	495		185	204	5	309	188	3716	60	28	92	387	5	134	1492	0	53	31		45	309	1437	777
6008	540		233	33	25	92	137	2112	27	23	55	144	4	82	440	1	37	16		116	195	1196	752
6009	511		223	100	12	350	305	2471	5	189	194	518	3	131	544	0	130	4		309	351	911	374
6017	688		249	317	7	273	315	2975	20	211	312	516	11	234	608	0	106	6		41	152	1117	365
6020	541		120	99	4	35	184	2585	19	43	189	411	4	134	475	1	163	21		123	178	987	502
6024	625		157	128	4	40	127	2816	4	28	197	538	7	96	784	0	107	11		197	237	855	200
6025	421		152	44	3	167	132	2361	19	26	86	342	13	216	598	0	146	1		91	142	736	112
6038	399		70	66	4	67	80	2316	4	6	67	333	4	62	367	0	58	3		81	172	707	293
6041	558		178	159	11	41	202	2371	9	37	127	358	2	164	519	2	20	4		38	155	1290	562
6064	804		337	222	22	84	241	3097	47	217	303	914	4	148	1433	1	111	33		548	425	1025	2174
6086	698		265	251	14	39	170	4584	15	55	337	962	0	240	1920	2	186	1		378	457	2491	534
6097	652		121	32	12	240	240	2325	19	32	185	297	8	117	371	2	74	6		78	157	546	98
6099	781		349	154	1	0	27	6145	11	42	453	848	1	159	477	0	11	69		26	80	1984	152
6106	569		215	257	6	214	246	3041	16	21	250	468	1	179	558	0	77	3		207	319	888	147
6107	459		94	141	14	26	80	2524	10	52	169	197	7	96	288	0	72	6		82	90	858	106
6108	705		241	68	7	363	315	3752	19	27	474	648	4	222	764	0	37	12		322	437	1196	203
6111	713		335	244	32	96	234	2557	18	43	307	278	0	187	755	0	11	27		43	158	904	71
6133	733		173	142	5	57	129	2455	8	21	161	462	4	209	385	0	32	6		73	130	605	64
6137	674		237	151	23	121	224	3295	3	33	250	587	1	108	347	2	53	7		136	167	1294	99
6138	500		92	118	4	144	177	2646	17	9	66	304	10	71	220	0	46	11		18	76	657	113
6140	529		189	142	22	279	266	2513	18	32	77	327	1	73	512	1	22	11		111	165	1053	149
6145	678		229	161	11	260	282	2534	27	30	167	205	1	177	381	1	83	24		25	99	1255	52
6148	528		169	146	12	47	233	2663	22	51	273	303	11	150	204	0	78	24		138	279	1119	124
6154	656		273	71	12	209	270	3111	17	29	118	538	7	296	815	1	54	1		217	182	1462	471
6163	461		221	77	5	216	194	3274	9	26	76	489	5	242	754	0	44	1		133	128	1547	478
6166	452		111	46	1	147	101	2404	22	15	100	329	2	89	75	0	82	11		25	72	942	54
6169	523		299	320	12	257	301	2947	12	148	181	329	3	273	292	0	18	20		11	43	1336	307
6171	316		116	252	0	375	198	3598	22	124	63	142	0	79	52	0	25	63		3	21	1001	92
6174	374		87	123	1	122	190	2756	5	107	66	236	3	64	90	0	50	26		9	16	780	273
6177	358		182	206	0	184	226	2672	18	19	44	232	0	109	182	0	41	36		42	106	651	155
6194	395		97	258	3	232	104	3666	75	35	60	451	1	73	572	1	45	38		88	180	1397	461
6195	495		285	183	6	290	146	3825	59	27	86	482	12	100	1484	0	49	47		29	123	3002	1888
6198	664		132	122	6	108	112	1894	12	29	163	270	5	118	263	1	120	7		21	69	568	139
6201	460		94	74	1	153	118	2604	11	18	79	171	0	79	93	0	23	21		27	62	455	106
6203	359		99	133	2	104	92	1914	19	13	16	194	2	66	194	0	111	8		64	109	961	178
6217	303		55	55	2	46	54	3224	33	41	25	690	2	64	566	0	47	3		8	63	1172	266
6218	340		79	32	1	167	103	2281	34	61	69	330	3	108	387	1	60	37		12	56	979	222
6220	443		191	167	15	207	188	4383	40	33	78	796	8	129	1601	3	89	16		318	555	2698	438
6240	515		92	75	2	97	92	1873	34	20	51	323	7	142	435	0	48	25		60	124	568	196
6241	482		144	127	0	219	174	2762	26	32	111	505	10	141	896	0	68	16		152	238	1265	324
6255	671		288	229	16	62	221	2809	17	29	172	287	5	181	292	2	143	54		575	629	1487	670
6268	563		312	568	0	365	244	5100	21	18	209	604	12	199	833	0	53	16		358	616	1477	317
6284	660		285	95	26	176	295	4206	18	70	320	688	7	216	1220	0	109	22		71	220	1464	936
6296	595		300	292	40	362	183	3278	22	110	161	369	9	125	1768	0	63	8		73	210	1758	1281
6390	581		205	38	8	236	175	1945	13	44	83	411	1	125	1221	0	58	11		245	443	1281	469
6424	551		77	51	6	35	126	2512	3	41	69	879	1	80	1378	0	47	13		61	96	1819	822
6434	631		210	220	1	220	96	2591	17	53	101	548	1	131	990	3	59	4		177	163	1853	741
6445	654		147	189	4	226	133	2797	50	14	77	197	2	119	545	0	26	13		18	71	830	187
6680	482		288	310	24	306	209	4199	35	121	340	993	10	133	1204	0	124	17		383	640	2083	797
6709	275		50	74	2	43	243	1480	5	8	24	176	0	7	55	0	31	3		26	43	1094	291
6744	1016		326	215	1	1	40	4239	34	40	394	696	0	422	330	0	52	42		294	484	1259	46
6830	739		279	429	17	559	437	5519	69	57	288	1169	3	214	1109	0	45	3		287	238	3206	555
6900	694		255	367	14	353	396	4139	11	41	224	415	3	262	485	0	43	3		314	430	1230	429
6906	527		125	39	4	159	130	2948	36	18	90	377	10	99	626	0	27	21		87	114	1152	924
6907	505		211	205	5	320	255	4226	22	30	264	219	3	196	950	1	32	45		285	388	1147	200
6908	562		329	310	31	155	403	4415	34	134	333	837	9	362	596	1	78	17		178	271	3798	677
6909	116		80	80	31	227	119	3503	1	2	15	407	3	53	170	1	44	16		193	46	3214	1162
6911	540		29	15	7	91	78	6016	20	21	48	1888	0	35	476	0	116	2		10	56	1058	721
6917	619		195	208	16	182	248	3161	12	167	140	555	3	240	343	0	32	5		29	116	1610	350
6923	581		409	169	33	468	584	5676	62	146	358	2282	15	493	1383	4	87	13		98	210	4891	1392
6933	250		75	46	2	87	51	3081	42	59	51	503	33	31	827	2	65	20		51	44	2429	581
6937	678		172	116	23	216	136	2699	26	39	145	405	13	81	534	5	126	10		47	91	1256	351
6939	659		152	306	6	286	247	3340	31	58	172	337	5	68	636	1	29	9		90	177	1930	528
6943	591		277	131	9	410	434	3827	39	61	251	1150	6	203	1559	0	80	13		374	660	2524	866
6944	649		477	682	41	532	398	4841	67	134	486	838	12	210	1133	1	191	8		116	258	3079	2896
6957	541		314	250	17	341	159	2508	15	41	110	381	3	184	1267	0	33	8		253	265	1325	746
6960	52		285	215	22	84	193	2483	52	47	144	405	8	240	722	0	44	21		451	387	1663	742
6966	635		473	805	18	521	360	6225	43	148	336	1837	14	304	2157	6	38	23		269	405	3944	2000
6970	652		336	98	4	345	454	5677	35	106	687	865	2	406	781	0	64	20		98	243	1326	97
6971	548		438	397	53	253	484	6424	45	166	603	985	15	289	1868	2	94	20		489	741	2502	693
6973	608		168	74	14	78	227	4289	19	46	188	552	5	90	772	1	38	7		201	274	1355	804
6974	574		221	73	36	117	236	3939	60	67	198	667	4	161	607	1	111	25		193	274	1783	936
6976	515		95	52	4	83	171	3571	19	16	113	332	2	29	285	0	26	12		70	162	1124	390
6979	934		499	475	19	215	309	6542	48	83	515	1045	6	262	465	5	74	31		79	259	2897	495
6989	702		374	207	8	738	544	3642	66	87	508	587	0	234	1038	0	74	16		225	198	2013	361
6992	743		171	32	14	212	239	2420	16	37	167	369	16	107	738	5	74	6		224	218	913	448
7013	719		390	414	39	569	607	3779	42	129	426	1042	8	192	1646	0	36	3		477	558	3936	2545
7028	771		190	530	5	600	281	2811	14	51	226	221	5	163	253	0	14	18		66	178	2585	2338
7033	517		469	222	36	549	872	6666	41	23	312	1534	20	404	1463	5	162	10		193	408	4871	2019
7058	417		72	98	4	105	152	1635	25	42	80	191	4	18	289	1	40	14		74	90	806	300
7067	413		110	36	3	212	185	2664	17	24	106	288	6	79	500	2	44	22		36	129	946	201
7094	565		238	642	2	305	505	2987	9	48	179	369	0	119	396	0	42	3		135	199	1783	727
7102	533		84	137	4	43	214	3597	50	43	143	602	3	123	672	0	78	13		19	71	2428	664
7103	527		392	110	3	381	375	5276	27	38	165	359	11	172	358	2	32	35		178	267	2425	496
7106	662		116	224	5	341	226	2042	13	9	114	376	1	84	236	0	12	2		57	100	1717	280
7107	981		577	809	16	601	420	4899	22	84	428	419	3	356	465	0	7	9		160	356	1395	153
7111	555		142	503	12	257	358	3577	20	30	161	532	6	72	376	0	59	16		176	227	1250	751
7119	679		146	87	8	204	188	1776	36	35	190	397	0	70	343	0	113	16		133	164	1232	323
7161	734		171	59	8	62	188	2671	27	24	175	445	0	246	97	0	45	7		26	80	891	262
7164	415		160	128	5	167	176	3888	6	77	65	228	0	112	228	0	82	22		79	124	1096	158
7165	714		296	490	28	723	639	3927	21	91	502	713	0	235	424	1	15	23		235	317	1561	610
7167	771		275	392	51	488	413	4858	75	170	322	797	11	116	1094	3	186	18		253	364	2531	1970
7169	685		198	290	11	83	163	2920	15	32	112	431	1	271	477	0	43	3		8	86	1113	790
7186	831		125	147	3	85	161	5043	9	24	124	767	12	51	67	0	32	24		7	63	1230	57
7202	616		139	25	23	76	135	1856	19	43	174	462	6	53	246	13	56	3		31	79	1553	909
7218	584		159	199	0	220	164	2691	34	29	117	340	2	131	305	1	62	8		10	120	1040	369
7231	420		307	334	17	413	468	3449	15	54	220	501	8	213	720	4	49	9		280	466	2734	1310
7244	556		204	714	41	497	605	3184	10	36	160	531	0	139	421	0	12	3		115	127	2778	869
7248	703		224	82	6	403	443	3831	36	2	155	801	7	182	618	2	53	5		54	173	1287	403
7250	794		248	373	5	604	268	2567	18	16	213	207	2	93	193	3	31	34		21	154	1796	309
7263	855		229	170	9	214	191	1750	26	46	231	405	3	143	537	4	55	7		71	184	620	154
7282	613		118	191	6	164	198	2072	23	11	79	246	7	45	278	1	86	7		60	70	1894	558
7288	506		155	338	11	292	254	3987	76	61	168	304	9	65	550	0	74	58		95	178	1578	379
7296	428		88	19	7	190	252	1921	20	10	37	110	5	32	90	1	6	26		37	197	1404	655
7308	591		177	434	23	245	255	3527	12	24	144	620	3	172	281	0	75	8		39	100	909	78
7316	511		338	115	2	253	329	3633	42	59	101	671	4	277	766	0	55	5		174	307	1515	514
7320	509		274	326	3	632	402	2856	56	41	236	506	4	199	1545	6	30	14		503	697	2831	765
7322	409		26	28	47	39	33	8384	27	13	39	2798	9	32	1378	0	72	4		17	49	1913	1087
7327	558		270	127	30	335	262	4483	60	36	169	1621	8	204	1485	3	55	14		72	155	2231	657
7328	391		34	24	9	20	23	7907	58	14	53	3549	6	82	2493	0	61	10		39	207	3030	813
7330	475		190	45	17	83	117	1742	15	22	121	426	4	75	943	1	102	30		295	400	1310	593
7346	574		204	250	11	288	247	4025	67	76	161	981	19	100	1755	0	55	20		277	370	2272	3155
7350	523		233	212	5	299	244	2521	42	28	194	433	4	90	827	1	20	2		371	849	1326	289
7353	670		248	83	4	383	409	4052	14	69	218	511	10	132	1485	0	89	46		90	256	1001	1258
7354	806		555	601	22	572	310	5216	65	147	467	915	11	394	2193	0	39	4		361	644	2667	792
7355	626		235	66	9	81	155	2751	23	78	352	316	17	258	663	2	119	12		282	657	909	122
7372	520		69	107	26	105	71	5940	37	11	49	1414	7	51	2050	1	79	16		76	163	2306	1503
7373	489		122	312	27	165	168	4166	15	27	102	689	4	96	782	2	65	9		105	140	1343	377
7377	675		255	96	11	371	390	5302	41	16	358	665	2	334	1403	0	139	12		149	218	1421	227
7384	477		223	258	2	7	73	3607	20	67	240	876	3	113	1248	4	15	4		392	310	1058	182
7396	429		86	95	16	81	86	4726	19	16	83	1580	9	117	592	1	101	3		87	232	1466	704
7404	754		419	618	9	507	582	5692	91	143	548	1496	5	297	1451	4	88	11		121	320	1975	863
7413	572		213	229	10	191	142	3715	13	37	146	563	3	134	774	1	43	10		52	194	1038	279
7418	594		214	104	0	0	17	9352	16	41	136	2508	4	164	1432	0	134	9		159	190	2001	1501
7424	663		244	235	44	481	308	3954	43	62	151	831	39	69	1624	8	76	8		117	298	2574	3396
7427	733		178	305	13	321	222	4074	48	63	565	620	10	204	1784	2	131	19		249	206	3689	581
7458	578		424	377	11	264	234	3322	29	31	274	431	2	67	1636	7	63	8		174	302	1640	562
7461	568		176	181	5	184	101	2077	29	30	75	142	2	67	198	0	28	15		64	92	571	208
7477	623		65	308	88	81	112	8740	59	13	57	3364	11	61	4383	0	69	17		103	233	4392	1921
7515	571		351	156	7	422	585	4874	93	8	252	1305	11	325	1854	2	102	11		80	297	2253	1085
7517	736		174	320	7	267	264	3439	12	35	248	454	4	111	375	0	77	17		101	286	1209	303
7521	1028		93	110	11	227	151	2283	19	74	189	522	11	83	490	0	78	12		167	168	1231	668
7717	622		556	714	158	784	597	7291	142	279	658	2824	39	641	2460	9	181	11		738	1599	5380	1277
7917	332		102	24	18	155	125	3784	79	5	61	860	37	36	1620	3	143	15		167	159	3037	2462
8077	639		470	189	23	452	695	4271	21	77	379	579	7	338	927	0	82	15		149	327	4463	1067
8132	581		258	465	44	287	279	3912	23	67	164	645	15	181	542	1	66	10		92	136	1675	1239
8231	583		218	384	23	112	341	3435	11	66	166	320	0	160	419	0	18	2		33	161	1603	485
8233	513		166	100	25	362	575	3068	23	2	90	522	12	90	1330	8	57	11		53	125	1584	1718
8234	655		436	539	76	267	453	5272	46	107	421	1715	17	512	1241	2	168	12		306	455	4759	1578
8235	545		141	135	1	192	120	3842	20	17	82	941	4	71	562	0	25	11		95	190	735	453
8236	577		205	54	24	172	228	2549	18	48	196	239	5	65	375	0	30	10		138	254	986	711
8238	605		427	475	252	466	577	6475	67	202	413	2943	12	447	1709	1	86	16		111	291	5682	2204
8239	734		344	76	29	369	575	4040	50	87	459	1376	10	173	1879	3	47	15		185	412	2951	3428
8244	662		470	362	115	437	384	6550	125	84	236	4692	21	517	3176	7	241	36		164	432	5884	1628
8246	582		371	305	131	297	483	3818	34	112	293	1470	9	376	1116	3	81	13		306	524	3035	1101
8247	670		197	161	17	179	233	2900	13	45	140	437	0	132	478	0	35	4		106	118	1013	238
8259	680		172	212	19	98	238	2650	15	81	277	339	7	128	508	1	28	8		275	229	1590	567
8264	516		13	15	11	71	61	7790	21	16	36	2330	8	49	1594	1	49	3		11	40	2130	1687
8266	659		292	296	13	88	354	3106	13	114	224	327	2	98	261	0	68	8		178	221	1976	452
8275	536		250	67	5	248	232	1962	11	30	125	479	5	119	673	5	44	15		238	294	896	1309
8284	561		114	56	0	122	178	2404	12	50	154	142	7	65	192	1	41	9		44	135	796	318
8290	570		137	121	13	220	190	2927	24	52	204	469	7	113	899	3	33	11		90	151	1153	327
8297	560		163	167	15	92	250	3655	26	94	247	447	12	92	260	1	42	4		28	72	1686	482
8325	678		142	256	5	316	166	2042	10	46	317	261	4	193	258	1	86	0		29	96	1565	180
8334	528		57	203	0	188	158	3135	31	17	106	474	3	29	297	2	43	12		26	83	1107	174
8337	650		231	204	47	105	204	3163	48	64	284	390	22	207	1386	1	51	5		439	653	1474	80
8343	580		196	301	34	86	345	3168	68	34	215	988	5	138	1311	2	60	12		53	202	2792	974
8351	434		116	175	5	151	208	2249	18	36	109	332	0	133	483	0	66	17		114	180	1010	289
8353	592		287	334	33	101	252	4811	25	37	171	599	5	248	124	0	34	18		27	96	1561	175
8357	450		202	107	4	201	137	3676	21	35	66	633	0	152	1788	1	93	4		197	289	1473	1068
8365	944		136	158	4	241	146	2328	21	23	123	230	4	109	500	2	62	18		102	273	1018	331
8366	559		291	449	16	435	318	3992	33	76	292	590	9	142	1000	4	12	15		274	339	1988	760
8378	443		80	102	20	91	111	7121	64	25	51	2261	14	54	3002	8	84	21		27	93	2088	1165
8386	435		125	45	15	55	132	2939	12	11	42	376	1	74	372	0	37	3		66	154	824	614
8419	580		219	92	48	269	343	5444	63	26	167	2800	20	297	1160	15	122	9		128	198	2684	1622
8424	469		204	54	43	323	355	4411	33	73	209	775	5	294	355	0	137	13		98	99	2858	560
8428	417		127	210	2	146	104	1287	10	15	56	117	1	65	172	0	28	8		30	59	636	510
8430	636		90	164	0	164	187	2167	14	33	139	212	2	48	135	0	25	5		8	51	759	376
8472	464		265	156	4	261	203	3865	9	26	87	450	34	53	1045	3	64	24		283	275	2537	2475
8584	463		99	32	1	203	182	2347	13	3	59	281	1	100	157	0	40	13		19	93	1015	35
9067	418		370	299	73	303	271	3857	10	242	251	1014	10	368	517	0	97	1		3	2	3064	665
9075	624		493	549	42	558	528	6940	81	192	381	3037	20	424	2070	1	165	12		11	3	5579	2031
9078	715		399	346	24	462	332	4927	21	141	352	999	12	416	813	1	89	5		4	1	3389	1203
9079	457		226	79	16	254	257	2956	4	71	187	450	4	222	325	0	96	17		4	5	2597	321
9081	630		472	425	151	451	530	6702	23	162	387	2193	17	508	1230	3	171	4		14	2	7105	2371
9084	563		436	420	65	497	425	8111	45	171	454	2265	13	453	1463	0	93	23		398	769	3463	671
9085	573		383	361	50	463	376	7620	33	132	340	1545	11	315	1498	1	82	26		341	672	3840	671
9089	568		359	350	54	155	369	7221	24	41	262	989	18	376	1387	1	122	16		6	1	3541	912
9091	431		351	279	42	276	178	4167	27	89	205	666	7	310	610	0	53	9		8	2	2650	735
9095	487		217	157	33	91	173	4816	31	80	162	1416	9	177	1088	1	58	6		7	1	2674	595
9099	383		209	251	39	409	281	3357	28	104	233	611	3	266	482	0	50	18		4	1	1616	236
9100	470		30	50	13	20	53	10699	28	32	47	3342	22	88	2023	0	128	4		79	229	2321	1293
9102	510		157	132	31	52	134	6039	49	32	134	2495	10	181	1417	8	133	7		117	257	1890	808
9103	525		136	146	71	121	153	4615	22	38	116	1441	13	167	727	0	103	10		1	0	2261	1056
9104	436		55	72	9	31	73	9625	33	18	53	4154	4	63	1360	2	64	1		85	176	1447	490
9105	413		135	113	20	34	124	4411	37	98	232	871	7	134	823	2	31	12		99	222	2301	744
9106	391		239	218	45	65	214	4420	41	77	248	1276	14	277	639	2	85	5		3	1	3180	927
9111	617		143	144	32	59	122	4712	29	43	136	1312	5	157	985	1	115	11		108	233	1977	515
9113	507		264	268	33	83	243	6115	57	73	252	2694	14	260	1843	1	93	11		3	0	3117	1470
9114	504		200	148	26	52	161	3921	17	40	170	859	4	269	336	0	127	2		141	388	2973	744
9115	516		162	135	19	46	166	3776	25	29	116	752	3	136	346	0	70	6		88	293	1983	672
9121	458		251	291	125	304	316	6667	18	98	232	1426	12	216	918	1	147	9		208	275	2836	1428
9125	608		258	246	107	317	317	6101	64	61	84	1839	16	233	1491	5	161	10		232	250	2528	1355
9128	579		333	381	181	426	495	8639	76	120	366	3260	20	340	2064	2	202	31		371	399	3525	1694
9130	614		308	334	170	433	467	5879	72	120	326	2489	19	338	1350	6	258	26		335	420	3166	2000
9131	589		303	299	154	310	447	4250	29	83	259	1309	6	262	1184	5	146	10		303	348	3248	1706
9133	394		428	467	153	424	633	5739	58	131	164	2552	32	426	1752	0	221	12		412	416	4723	2290
9134	510		371	348	177	408	484	5392	83	98	149	2460	24	340	1873	5	192	9		364	355	3735	1870
9298	457		290	109	14	375	421	3286	33	96	266	588	7	251	722	1	82	35		48	127	2555	643
9312	623		418	511	20	702	665	4995	31	235	422	1080	17	281	1456	8	63	4		307	522	5352	1683
9314	549		296	106	13	324	400	3771	71	133	190	1105	27	247	1630	4	60	25		107	242	3263	1480
9321	529		167	171	4	166	236	2771	2	120	97	368	5	109	553	0	17	16		17	51	1017	234
9386	626		177	185	6	306	222	3292	21	40	187	467	6	239	254	0	118	26		89	226	326	74
9388	560		166	153	2	220	181	2683	15	73	85	423	5	155	452	1	42	22		23	61	678	223
9404	627		137	141	12	164	235	2204	13	14	137	360	1	105	283	1	74	9		67	90	747	329
9405	534		175	147	18	193	276	2732	10	21	100	382	4	106	430	0	30	1		84	106	982	409
9408	453		90	84	5	26	214	2131	13	7	40	226	3	55	193	0	29	10		60	162	626	250
9409	515		91	108	9	30	115	2127	8	26	119	259	6	96	446	0	16	2		114	209	726	256
9421	1057		208	21	0	95	127	4521	11	15	256	692	0	217	309	0	56	15		98	114	766	142
9433	540		142	126	8	58	144	2668	29	72	137	237	3	158	446	0	34	27		133	198	1307	209
9451	515		97	179	12	149	148	3000	12	20	78	167	5	97	381	0	35	5		84	203	1048	347
9503	544		237	192	14	178	221	2730	26	53	256	473	1	252	1458	1	41	7		142	223	1580	202
9506	610		231	228	8	356	281	5235	54	76	259	917	8	154	1905	4	193	3		64	180	1759	1088
9507	430		136	85	7	34	90	4813	39	0	137	298	0	198	109	0	45	42		130	258	1179	60
9508	739		594	1088	62	158	483	6136	81	145	643	1356	11	347	3173	8	83	22		780	785	3472	1532
9509	373		232	651	31	79	201	4952	77	34	116	928	2	130	822	0	40	47		63	217	2480	1303
9510	503		147	224	0	248	146	3631	10	16	105	488	0	110	510	0	47	56		0	0	1472	545
9511	467		150	208	15	77	221	5751	44	21	167	722	7	223	609	0	30	17		112	208	1612	499
9512	365		131	217	0	229	150	4616	64	26	41	753	18	164	841	0	25	13		95	154	1563	940
9513	481		115	233	39	115	91	3488	30	27	135	888	1	131	506	0	43	31		3	15	1739	456
9514	494		167	291	2	318	151	3822	30	30	147	441	2	239	629	0	31	20		0	0	1519	169
9515	385		132	253	5	177	134	5474	33	22	96	828	0	252	698	0	29	13		78	90	1499	390
9516	477		109	202	5	219	138	4084	69	28	94	1045	3	85	585	3	56	46		15	65	1256	353
9517	541		118	33	0	47	149	2471	33	26	61	283	0	81	91	0	8	18		11	48	1146	144
9518	555		237	102	14	279	248	4049	40	41	173	709	1	209	775	1	80	22		75	124	1579	356
9519	596		387	386	55	157	433	6773	37	86	340	925	5	497	1941	1	27	15		247	515	2755	163
9520	715		235	255	44	132	285	4751	15	159	355	656	7	326	612	0	59	26		242	286	1880	180
9521	455		150	229	7	88	156	3702	24	26	137	474	0	154	276	0	37	21		23	70	787	52
9522	557		121	331	1	301	273	4642	54	32	197	816	21	204	402	0	55	27		246	475	1709	503
9523	431		122	144	10	39	133	4418	15	66	222	506	5	177	871	0	99	31		68	47	1239	530
9524	501		282	301	29	107	223	7800	18	74	450	1010	6	382	1963	2	54	14		143	234	2268	500
9525	591		322	60	14	358	348	7093	21	244	391	965	9	217	1008	4	66	3		110	204	2541	895
9526	561		179	92	6	367	427	3743	42	28	255	820	6	299	421	3	81	96		93	145	992	99
9527	568		233	232	6	51	171	4292	17	44	194	374	6	174	274	2	70	20		196	281	909	215
9529	412		255	250	1	277	190	3265	44	21	170	685	15	224	1091	2	88	65		94	378	2154	560
9530	492		90	81	2	150	112	1989	35	20	133	352	15	144	752	0	73	16		0	2	740	67
9531	649		288	245	0	184	224	2986	38	50	208	227	0	422	202	0	51	45		0	4	822	67
9532	662		143	233	0	59	143	4840	8	22	180	471	7	80	487	6	104	13		3	33	1215	128
9533	476		211	124	12	41	493	3394	22	49	171	291	10	149	396	0	83	18		3	27	952	906
9534	359		77	102	2	165	112	4480	14	37	82	553	8	96	341	0	93	5		16	23	907	114
9535	382		184	40	3	219	240	4819	26	37	205	762	9	232	982	5	144	21		101	162	1040	162
9537	465		207	225	4	355	236	4061	39	19	198	434	18	212	582	2	26	24		498	653	2121	382
9538	509		224	163	38	213	252	4321	31	67	229	643	10	121	1205	0	106	10		115	136	2107	726
9540	570		150	179	7	201	169	5048	21	113	172	745	15	147	792	0	50	19		239	226	1262	706
9541	550		135	169	8	57	146	3958	0	43	222	715	7	147	689	0	98	9		599	722	955	408
9542	437		195	124	13	65	449	3793	6	28	150	551	0	91	283	0	163	53		162	258	1071	703
9543	401		98	1	5	276	228	5559	28	51	130	411	14	80	805	8	56	34		8	38	1371	1622
9544	457		129	169	33	80	71	2706	33	21	127	310	4	105	353	0	84	43		135	227	970	103
9545	447		157	297	6	45	94	3546	17	33	113	565	17	83	206	3	28	32		0	18	957	885
9546	313		106	28	1	265	146	3290	10	10	47	271	1	194	29	0	102	23		30	145	1001	3
9547	522		195	148	2	225	176	5363	33	26	258	476	1	227	240	1	7	14		32	148	1487	59
9548	593		250	217	1	294	222	6110	22	88	182	708	2	139	323	0	17	24		14	3	1210	227
9549	619		264	700	27	110	198	4653	23	52	306	560	8	178	238	1	95	7		24	15	1541	479
9550	400		109	212	1	154	117	3547	34	31	127	718	1	95	737	0	73	14		7	70	1135	370
9551	532		80	18	3	20	97	2793	14	24	82	291	0	87	113	1	67	36		24	51	679	76
9552	517		85	150	25	40	114	4096	45	33	94	690	2	88	241	0	111	8		119	151	959	430
9553	686		104	197	1	31	99	4591	13	35	136	485	1	48	816	0	35	5		32	60	2038	891
9554	539		383	454	25	67	139	4293	8	43	218	586	7	238	820	0	71	29		4	43	886	662
9556	499		96	55	3	204	143	3837	17	33	224	661	11	230	688	0	80	0		108	157	1003	133
9557	587		147	81	0	216	202	3893	29	162	298	671	4	206	950	0	75	38		31	157	1205	438
9558	560		198	221	31	132	267	5672	14	240	263	1017	9	226	2124	4	122	4		146	224	2025	702
9559	568		314	456	0	53	52	5451	30	45	239	796	3	243	955	0	93	14		44	108	1174	141
9560	538		218	224	9	176	291	7015	25	70	284	1247	18	332	1978	1	43	1		302	270	2611	1316
9561	669		226	205	12	114	256	4230	31	93	403	620	8	265	431	1	76	18		261	273	770	75
9562	603		353	277	13	698	331	6985	28	317	550	1711	13	341	2692	3	94	7		725	589	4341	3161
9563	508		224	242	2	327	329	3649	17	99	264	660	1	104	465	1	95	9		174	184	1140	401
9564	624		257	77	18	485	498	4196	64	90	371	960	12	363	622	0	71	14		115	341	2069	379
9565	384		235	238	46	65	242	4709	31	66	161	752	1	213	1919	0	33	7		89	174	1788	1628
9566	558		304	71	9	101	290	4739	17	67	135	608	1	282	1032	0	27	16		188	164	1763	272
9567	745		260	141	11	460	280	4366	10	230	292	821	5	202	1204	0	35	25		62	280	2859	382
9568	593		409	357	32	128	425	5820	42	119	351	1137	9	386	2185	0	97	12		183	511	3647	974
9569	632		187	204	27	330	299	4324	27	66	269	946	25	164	1296	0	208	15		89	183	1890	1086
9570	405		162	100	5	191	128	5078	25	58	192	654	0	229	296	0	50	33		34	134	1179	336
9572	577		387	91	13	482	400	6082	68	219	361	770	33	363	984	1	90	30		138	395	2511	1121
9573	497		134	33	4	206	108	2798	6	13	109	189	9	148	416	5	117	18		44	122	1209	57
9574	521		235	479	17	193	409	7058	14	94	373	405	2	369	428	1	84	37		21	52	2478	196
9575	778		199	67	20	108	228	4427	4	37	189	319	11	164	116	1	36	60		32	156	2013	60
9576	550		194	312	5	90	219	4406	17	97	233	316	1	243	215	3	53	59		87	219	1971	113
9577	599		188	176	2	287	239	5185	27	53	146	486	1	159	444	1	94	28		73	104	1468	190
9578	532		123	256	12	244	173	4098	35	25	152	297	0	157	216	0	43	49		33	118	1606	41
9579	479		195	37	4	67	202	4981	34	51	251	578	5	198	375	0	83	45		39	65	1160	65
9580	748		144	249	3	56	156	5176	20	23	262	560	0	149	373	0	30	29		0	0	1192	113
9581	375		160	59	0	245	196	7184	25	36	110	615	0	181	308	0	65	9		9	49	1140	25
9582	502		180	172	10	372	203	5984	25	74	278	837	10	227	671	0	153	43		67	177	2554	606
9583	653		106	83	1	241	333	3235	44	54	262	460	7	215	866	0	117	11		19	1	2599	499
9584	404		300	55	52	151	360	4901	45	56	190	768	6	272	921	1	39	15		470	496	2192	358
9585	579		283	71	14	355	306	4824	25	92	273	471	2	373	150	1	36	16		84	110	2894	132
9586	769		378	594	3	445	139	4039	20	71	283	563	3	218	611	0	94	21		47	154	953	208
9587	426		217	126	23	133	284	5222	33	46	290	1077	7	305	731	7	110	17		49	213	1473	226
9588	611		247	191	1	444	576	3358	12	83	249	336	1	285	245	0	91	87		77	145	2160	437
9590	586		117	82	1	14	44	2259	16	38	159	370	8	301	91	0	75	4		16	37	1038	22
9591	610		148	114	24	46	174	4038	78	66	156	638	2	164	832	1	75	29		96	199	3138	1011
9592	646		281	109	23	192	339	4418	38	49	296	543	11	274	673	1	154	16		77	187	1583	708
9593	565		170	130	12	231	226	4038	29	27	135	576	4	120	507	1	45	48		184	253	1330	137
9594	774		146	94	5	243	190	4595	17	101	239	607	10	198	1004	4	96	18		141	136	1106	645
9595	468		458	264	11	141	366	6729	40	65	229	712	21	265	740	2	61	13		5	37	1265	166
9596	669		495	624	90	114	346	5543	66	102	381	1336	5	265	1861	1	91	16		126	286	1908	1122
9597	564		155	309	10	123	187	4904	19	77	193	654	10	339	461	0	13	30		179	297	1208	218
9598	503		357	815	26	132	225	4478	33	77	708	504	9	237	475	0	91	28		162	267	1538	232
9599	703		84	219	1	48	141	4349	9	25	246	486	14	153	245	0	73	4		95	168	1363	181
9600	537		296	405	26	60	166	2723	30	58	218	758	32	131	637	2	135	18		338	371	1391	779
9601	567		179	198	4	295	195	4832	11	33	141	591	6	158	1176	0	76	2		122	221	1772	203
9602	752		312	510	90	475	402	6155	51	147	340	1514	9	265	2994	3	184	28		433	500	3550	2558
9606	705		285	255	25	292	238	2885	49	47	116	293	4	187	1224	0	20	29		123	394	1037	751
9607	609		181	164	6	186	210	2973	15	80	117	270	2	129	886	0	71	6		173	185	1290	883
9608	722		322	425	9	366	262	2576	34	38	107	186	1	203	1031	0	33	36		187	218	822	488
9609	644		210	191	15	302	240	2823	47	36	156	410	3	114	1513	4	66	39		268	269	1660	400
9610	606		223	281	23	550	406	3221	40	73	151	505	7	102	1464	1	74	6		399	426	3648	856
9611	599		440	224	8	547	272	3185	36	52	236	210	3	195	560	0	77	75		231	286	1026	584
9612	624		247	199	21	331	181	2432	23	54	195	422	0	233	1359	0	118	12		281	255	1335	759
9613	705		152	111	3	187	168	2654	17	18	78	257	3	108	897	1	44	4		77	168	1308	316
9615	598		205	287	13	261	271	2568	19	36	159	244	3	92	238	0	64	6		78	110	1302	758
9616	783		284	318	17	328	300	2905	28	70	189	492	5	196	289	0	59	15		180	217	1536	429
9617	698		244	191	13	79	161	1822	48	36	212	297	6	190	318	1	50	12		145	204	1119	264
9619	473		204	179	11	65	189	3432	25	53	195	579	4	260	634	2	41	15		185	201	1277	219
9620	493		238	247	18	78	199	3336	31	57	236	518	4	246	642	2	56	22		193	273	1297	276
9621	585		244	186	24	102	184	3902	26	87	229	892	10	209	1013	5	74	10		197	187	1150	405
9622	596		240	100	6	115	258	3679	35	55	196	226	1	122	1196	0	47	17		273	358	1384	1059
9623	584		150	95	4	259	197	1716	18	19	142	120	1	20	72	1	21	28		57	120	713	127
9624	600		150	85	8	155	144	1888	21	36	190	513	5	152	573	0	107	11		132	179	484	81
9626	531		189	179	36	368	220	2837	18	12	113	307	0	149	627	1	67	40		295	315	1430	446
9627	594		241	195	43	307	293	4415	90	68	224	1006	10	257	1330	1	80	11		319	340	1782	912
9628	533		167	205	33	386	399	2405	12	41	121	210	7	77	476	2	58	7		172	296	1139	392
9629	555		216	172	21	409	253	3461	32	49	249	308	5	213	521	3	66	34		202	433	668	149
9630	546		80	21	4	210	131	2428	7	26	61	104	4	58	177	1	33	16		39	109	562	89
9631	485		204	100	19	299	182	2209	24	46	212	146	6	167	245	1	50	47		160	189	558	90
9632	774		93	45	5	59	104	2030	14	21	107	224	3	143	553	1	25	0		127	191	852	146
9633	541		211	76	8	57	124	2859	17	46	244	416	4	205	901	2	77	24		161	194	938	142
9634	458		224	71	7	42	126	3914	75	17	81	980	5	120	2251	0	48	48		316	276	2232	765
9636	522		103	27	2	31	93	2421	19	18	101	230	3	118	631	2	57	27		125	120	583	209
9637	398		109	39	16	53	94	3635	28	33	83	1128	6	118	696	2	61	9		150	140	962	577
9638	514		117	85	3	39	79	1675	24	24	107	210	1	146	300	0	51	18		88	99	523	159
9639	698		209	47	3	78	173	3635	16	37	147	533	2	175	555	1	81	65		394	323	1002	558
9640	509		172	33	3	51	155	2071	21	31	137	223	3	207	696	0	56	41		115	151	834	509
9642	418		136	19	5	62	112	2421	34	50	148	619	3	228	562	2	72	32		240	226	810	375
9644	871		174	185	1	181	228	3239	8	44	248	358	6	158	525	0	52	11		112	217	806	184
9645	652		276	240	2	107	300	2035	14	37	116	303	1	175	555	1	80	10		333	532	1321	452
9646	345		177	52	10	85	233	3519	2	29	242	404	12	142	179	0	62	6		180	425	1824	395
9647	651		412	233	34	460	358	4528	68	52	246	456	9	231	1385	4	68	50		118	361	1257	1281
9648	673		334	355	12	329	226	2863	26	64	269	611	4	223	1075	0	75	15		310	457	1143	709
9649	598		373	128	39	135	268	4105	57	68	350	985	9	63	2093	2	111	50		510	524	3217	1945
9650	461		72	83	9	94	162	2699	7	18	44	472	4	49	960	1	48	4		81	131	962	389
9651	508		122	11	4	76	104	2616	25	10	80	261	4	73	213	0	30	9		87	134	496	158
9652	577		167	98	2	53	104	3724	22	28	207	330	6	131	822	0	45	44		79	133	1468	190
9653	547		235	209	12	274	221	2837	23	30	183	361	2	164	1596	1	81	12		36	150	1637	666
9654	510		290	62	1	273	212	2224	13	40	142	307	1	239	484	1	72	20		306	438	1543	639
9655	635		245	339	35	368	290	4589	28	58	332	934	6	225	2052	7	66	15		411	501	2751	1080
9656	611		264	274	23	429	304	4518	48	80	394	599	5	190	1531	2	187	19		485	514	3364	562
9658	625		324	76	12	167	248	4257	39	94	402	440	13	234	1518	0	76	61		272	429	1367	1249
9659	531		287	176	11	71	176	2863	19	79	202	239	5	168	835	0	36	48		193	411	843	425
9660	476		206	288	14	78	205	5410	29	72	246	755	7	258	1514	1	27	15		238	370	3160	822
9661	512		179	26	5	64	144	3313	18	36	189	232	0	107	586	0	43	52		127	189	889	325
9662	488		101	94	7	193	169	3201	16	28	93	460	2	88	834	3	92	8		125	265	1054	396
9663	711		8	62	0	50	84	2011	8	5	43	156	4	5	12	0	24	0		9	28	938	234
9665	505		163	137	1	71	73	1191	13	11	84	86	0	143	75	0	54	7		56	169	684	229
9666	625		321	384	14	331	249	3605	23	87	249	302	6	194	929	2	16	17		246	328	2262	567
9668	613		171	161	1	219	141	1880	19	28	100	129	2	143	138	0	43	16		49	128	765	434
9669	567		65	86	12	152	116	2078	27	15	77	298	1	73	608	0	59	8		61	160	1199	488
9673	571		96	82	5	119	107	1654	23	11	67	200	1	78	758	1	72	1		108	191	813	576
9678	635		207	179	14	71	174	2201	41	41	233	196	5	172	1940	6	64	7		153	245	1569	480
9679	629		186	193	3	243	178	1807	17	30	105	256	4	131	475	3	72	11		46	98	913	616
9680	653		230	263	4	270	225	2181	28	30	150	329	3	152	699	2	87	16		50	153	1025	883
9681	598		209	195	1	248	197	1613	16	16	119	240	5	148	331	1	51	10		25	122	922	535
9682	531		99	56	4	174	100	1816	14	17	78	227	5	84	485	0	57	0		50	69	879	173
9683	617		179	192	5	245	164	1806	11	21	94	202	3	113	386	2	66	8		25	92	806	456
9684	602		276	296	31	353	471	3095	4	62	222	247	6	157	619	2	57	13		239	525	1941	757
9690	748		207	218	10	422	249	3761	49	51	268	706	9	134	596	15	66	3		56	151	701	216
9693	661		170	79	4	200	180	2333	27	49	165	258	2	161	396	2	48	12		56	179	685	324
9696	694		156	142	4	192	197	4205	38	29	161	314	3	120	606	5	72	6		22	77	1620	214
9697	577		227	170	21	69	153	2313	12	34	62	347	9	189	445	1	70	27		57	228	725	421
9698	648		230	195	21	322	243	3415	38	208	256	861	14	145	715	2	181	21		288	404	748	219
9699	557		273	82	20	97	333	2874	14	74	190	423	3	257	883	1	61	4		427	520	2301	723
9701	643		142	236	15	219	163	2594	25	22	101	399	2	109	375	1	69	20		104	155	1233	427
9702	748		219	186	8	64	143	2689	15	34	292	344	3	276	435	0	54	26		160	366	1592	850
9703	601		234	136	13	70	124	2929	12	59	132	228	1	205	1082	1	66	19		232	467	1331	965
9704	459		383	143	24	108	323	4335	46	78	400	1145	10	265	1535	2	142	14		148	436	3435	529
9705	381		158	53	19	49	132	2508	24	52	54	874	3	100	2116	0	41	2		289	254	1439	678
9706	754		208	174	24	127	344	5182	34	37	97	510	0	243	543	1	36	1		155	173	1704	1424
9707	538		133	48	21	208	167	2350	14	45	122	512	8	116	720	3	122	9		61	114	1067	409
9708	699		37	53	1	65	55	5324	1	10	61	276	0	31	33	0	41	6		5	18	1275	308
9709	469		216	48	0	313	319	3337	19	48	134	408	0	218	505	0	10	8		66	251	1055	278
9710	642		191	231	11	327	237	4720	19	36	314	502	2	201	1281	1	36	9		188	363	1735	178
9711	630		71	26	6	151	141	2040	14	19	81	139	0	51	72	3	34	5		42	101	1097	125
9712	509		266	241	5	348	165	2649	25	55	116	332	4	164	1029	0	45	20		252	498	1083	886
9713	642		310	265	13	341	223	4396	60	46	156	659	6	223	2926	1	27	20		238	505	1954	948
9714	497		137	154	7	42	144	2763	30	25	109	290	2	111	886	0	19	6		34	107	1066	212
9717	523		84	223	4	175	175	4006	4	35	84	674	1	75	424	0	61	6		119	254	1292	600
9719	508		243	188	43	128	179	4323	35	57	159	624	13	189	1464	4	46	24		100	247	1477	974
9720	633		222	208	5	265	245	2320	6	57	242	376	9	211	865	1	51	21		92	176	943	148
9721	609		216	320	5	260	255	3428	37	70	145	474	3	168	1394	0	22	7		150	340	2730	416
9722	483		60	86	0	18	125	3647	3	24	67	539	8	25	133	0	62	4		58	141	768	98
9723	673		399	270	5	278	194	1981	20	33	157	141	5	291	625	0	18	19		83	141	913	553
9725	398		81	143	8	156	198	3172	7	23	71	415	1	118	79	0	25	5		23	77	824	233
9726	654		253	239	8	304	290	2722	28	42	165	373	3	228	743	0	16	18		137	284	1713	1064
9727	570		317	54	14	350	231	3092	41	51	217	456	4	250	929	0	85	76		104	333	1326	551
9728	551		279	283	28	392	163	3628	37	83	154	659	12	146	1333	3	12	43		217	381	1027	687
9729	646		338	453	19	359	392	4217	30	148	498	739	1	269	1623	2	67	9		475	608	2448	718
9730	432		52	71	2	73	55	1819	6	18	62	245	3	33	133	1	69	6		35	46	806	125
9731	692		177	294	2	249	208	2707	4	52	97	420	5	115	413	0	44	11		132	258	964	353
9732	437		70	111	2	109	79	2608	3	20	78	376	1	75	372	0	52	4		65	109	625	257
9733	786		219	40	6	253	242	3725	10	66	283	536	5	185	954	2	22	7		139	162	1112	570
9734	537		225	248	1	398	345	3575	21	71	281	595	11	118	371	2	39	31		68	156	1182	455
9735	509		151	174	5	144	126	2148	14	50	137	207	0	123	592	2	44	4		125	136	1387	482
9736	585		248	203	4	371	212	2404	23	34	279	366	6	224	201	0	66	22		31	209	1366	283
9737	632		382	354	35	421	198	3924	43	70	258	789	7	268	1640	8	91	24		443	602	1901	1092
9738	590		169	21	2	182	191	3375	46	32	121	429	10	120	1093	0	45	23		52	173	1441	620
9739	838		255	43	3	338	305	3135	61	63	254	408	11	272	642	1	115	22		116	359	1457	1048
9741	698		136	159	10	189	157	2621	7	31	172	363	10	104	416	2	71	5		141	236	861	297
9742	687		313	267	10	95	254	2694	26	36	183	236	6	270	828	2	62	32		277	723	1283	1112
9743	586		61	118	2	150	164	3459	5	6	38	539	0	26	93	0	10	5		52	138	995	105
9744	798		325	328	3	261	166	2052	16	16	117	96	3	152	295	0	34	34		22	113	783	415
9745	744		203	156	26	291	225	2389	30	54	180	349	14	263	915	4	110	19		203	269	1002	1071
9746	423		130	30	32	109	217	2567	18	39	90	377	5	80	1403	1	70	8		292	279	1310	523
9747	557		363	138	21	190	335	4441	47	86	293	664	13	217	1300	0	64	9		433	721	1839	1949
9748	483		336	243	17	362	222	2670	78	78	160	539	11	192	1370	1	67	38		404	462	1078	1025
9749	606		362	65	23	134	267	3641	36	98	203	489	4	257	1419	0	99	26		435	536	1645	822
9754	784		230	243	19	342	312	2847	3	63	280	568	4	158	892	0	106	13		308	329	1752	690
9755	491		203	154	17	484	220	3982	41	40	69	749	12	123	1337	0	151	23		58	224	1546	1161
9756	663		157	172	2	178	191	2502	23	13	217	300	5	203	340	0	42	21		62	170	1063	244
9757	373		79	31	9	90	82	1841	4	13	33	151	0	63	90	8	66	33		13	45	910	383
9759	612		189	164	7	51	189	3420	7	46	189	372	1	163	91	0	57	36		0	0	1086	100
9762	519		61	84	6	104	96	4457	11	18	73	940	1	55	268	1	46	9		11	49	641	250
9768	535		211	58	16	318	409	3012	47	48	62	839	11	120	1097	4	113	5		158	264	2985	1642
9769	554		139	64	0	168	181	2910	19	22	35	201	30	87	291	0	0	24		77	144	1452	245
9770	540		306	151	19	435	403	3193	30	85	184	400	19	191	395	0	49	38		147	233	2957	524
9771	535		211	307	3	408	379	3569	19	40	214	694	1	195	834	0	30	1		150	164	1884	332
9772	482		171	101	0	247	471	3239	30	64	220	464	0	123	515	0	81	27		46	147	2842	516
9774	535		239	232	12	408	314	4046	27	45	164	457	20	114	523	3	55	25		59	274	2533	654
9775	460		253	161	14	165	185	4300	35	50	82	681	23	111	1812	2	132	3		268	295	3013	2693
9776	554		223	161	8	254	259	3942	43	26	100	707	13	110	1068	0	49	9		38	174	3074	1622
9777	552		244	205	20	124	316	3320	44	44	178	387	2	138	1053	0	38	19		163	288	1442	923
9778	467		90	338	0	165	230	1938	27	12	98	376	2	95	561	1	24	10		25	99	943	487
9779	687		317	270	24	442	418	7857	33	46	238	756	28	182	1578	3	106	19		326	332	3216	1809
9780	747		203	33	7	276	246	4088	23	48	234	675	27	75	1437	1	93	5		62	240	1743	1723
9781	413		229	347	6	485	224	4197	43	35	182	981	28	86	1349	1	76	18		140	428	3814	1030
9782	479		151	235	13	264	167	4108	30	41	81	561	4	61	1023	1	102	7		156	208	2506	1006
9783	531		306	457	166	550	303	4802	90	80	315	1405	15	199	3255	1	239	13		130	458	3887	2329
9784	892		148	237	5	191	214	1961	16	36	265	346	10	146	392	0	34	17		82	103	811	336
9785	367		102	43	4	203	199	2319	22	15	22	332	4	68	419	1	30	13		99	108	1545	2470
9786	465		255	177	24	387	270	4073	40	82	177	479	15	139	725	5	111	30		226	254	2351	1063
9788	422		152	86	10	290	267	2971	19	64	229	360	6	97	366	0	64	20		107	126	3100	522
9789	773		324	188	4	637	489	6541	32	54	421	1073	8	214	1942	1	28	6		316	363	2088	875
9790	443		195	196	13	84	215	2883	5	22	75	178	4	128	123	1	20	7		19	93	811	538
9791	723		186	71	3	495	345	5816	56	86	336	1174	9	179	904	5	53	3		188	273	2178	699
9792	446		220	265	11	335	181	3773	36	50	114	481	18	77	1352	4	100	15		229	284	2925	1600
9793	609		238	212	40	119	397	2834	29	57	144	284	2	71	577	0	9	27		120	164	2053	543
9794	585		330	395	30	437	275	4671	60	46	218	1222	14	169	1563	1	71	3		67	255	2982	1426
9795	481		222	58	22	453	276	4121	24	50	227	1051	18	99	1551	4	80	18		507	581	4342	2391
9796	561		295	550	23	318	303	4906	33	62	249	838	25	190	1590	1	100	6		419	535	3145	1750
9797	528		173	166	0	345	324	2541	23	66	237	212	5	124	113	0	10	8		36	55	895	122
9798	498		93	129	13	344	266	2611	0	39	170	248	0	40	97	0	19	14		0	35	1016	29
9799	640		172	91	24	257	187	2480	11	33	143	433	3	118	493	0	65	10		102	132	905	237
9800	697		225	415	21	236	428	3086	17	47	120	254	0	175	450	1	21	8		105	190	1901	216
9801	546		91	52	3	324	203	1706	14	19	66	179	0	86	117	0	48	12		18	39	1019	79
9802	442		275	284	13	511	203	4487	16	67	163	569	7	136	705	0	20	58		201	284	2619	666
9803	395		146	176	19	307	150	4388	24	30	159	840	15	75	855	2	145	11		404	392	3093	1375
9804	535		306	114	55	592	389	6236	30	74	339	811	37	133	1851	1	103	7		128	242	3562	2516
9805	789		183	36	15	315	185	2618	20	45	276	496	4	110	507	2	86	19		94	136	997	168
9806	608		318	51	10	458	271	3258	56	69	185	504	1	85	466	0	21	5		74	205	1306	302
9807	454		250	128	35	568	442	5642	39	52	157	1221	3	200	981	2	65	5		350	521	2763	1777
9808	425		222	101	22	300	276	4116	39	75	135	771	16	124	2596	1	98	21		339	477	4173	3377
9809	665		264	130	24	448	370	4426	26	43	271	846	9	157	1540	6	126	19		325	423	3479	1779
9811	517		257	167	13	274	183	3480	26	23	129	372	42	140	1765	5	50	11		279	350	4338	1311
9812	656		208	164	10	220	175	3120	26	70	227	519	6	149	1098	14	174	5		288	296	1696	1067
9813	545		223	285	1	292	154	5956	37	61	164	406	14	169	711	11	92	17		209	372	2027	446
9814	433		148	148	7	186	127	3329	29	23	131	792	7	104	819	3	36	3		196	368	1673	875
9815	519		206	180	12	267	206	5204	27	49	163	866	39	81	1217	0	176	14		486	416	2217	2664
9816	516		238	297	17	503	257	4831	36	96	229	826	14	165	1695	5	155	23		400	426	3413	1608
9817	544		145	203	13	66	154	3633	13	24	224	580	2	115	295	2	21	7		281	313	929	650
9819	564		89	92	5	10	41	2864	3	28	23	220	8	62	425	0	48	0		59	116	883	377
9821	453		146	120	9	86	181	2375	8	11	203	330	4	136	879	0	6	55		43	154	1434	305
9823	383		71	32	0	32	49	2121	7	13	35	187	0	25	88	2	24	26		29	36	663	182
9824	520		195	25	1	155	169	2069	0	13	100	460	1	127	442	0	48	5		85	88	758	206
9825	428		113	119	12	47	144	2864	10	29	84	460	0	59	712	1	44	4		175	227	929	672
9826	766		187	268	28	93	260	3506	7	41	242	609	2	85	295	0	53	1		52	139	681	724
9827	511		91	72	1	10	75	2090	14	5	51	327	1	90	538	0	71	9		229	261	1056	238
9828	526		65	27	4	18	40	2521	4	10	28	328	2	56	239	0	28	1		7	32	585	378
9829	533		36	80	5	13	80	2466	6	6	28	271	8	36	203	0	13	2		0	3	398	753
9830	809		342	330	33	472	395	2649	25	41	261	849	27	175	1087	2	85	23		11	80	1131	663
9831	435		127	206	24	205	186	2741	5	16	165	403	0	105	204	1	52	12		17	62	693	86
9832	599		114	190	3	316	198	2415	28	26	93	179	4	76	238	0	23	11		7	19	1387	1413
9833	669		155	77	15	74	282	2772	9	38	163	350	2	117	371	2	10	8		123	148	1593	783
9834	549		283	277	27	631	220	5606	64	217	326	1710	33	255	1653	8	52	23		797	1107	2086	377
9835	511		158	123	6	208	153	2834	9	45	126	437	9	177	409	7	70	11		154	153	1261	717
9838	542		71	22	3	17	73	1821	8	4	43	109	3	64	89	1	35	7		8	52	661	230
9839	500		109	145	3	95	84	4652	3	28	149	289	1	72	230	0	57	7		64	98	1075	440
9840	476		103	37	9	162	66	1916	21	21	133	263	0	44	501	0	72	29		100	112	932	200
9841	700		338	446	34	390	322	5826	50	268	182	1497	7	160	3037	0	24	3		516	709	3893	3376
9843	747		245	338	65	84	296	4079	7	89	298	906	3	129	1537	0	21	4		405	375	1727	2979
9844	943		219	339	8	368	297	3284	28	65	136	420	0	177	533	0	5	16		70	303	809	268
9845	731		253	391	0	212	461	3504	21	112	520	817	0	106	1895	0	63	63		744	926	3730	1025
9846	919		260	390	4	530	328	4651	10	58	339	652	4	251	629	0	24	18		279	421	904	141
9848	868		152	215	1	309	248	2768	4	59	250	250	0	231	288	0	12	20		122	230	535	57
9849	686		196	212	60	102	360	4944	18	86	262	1255	7	159	995	7	100	4		152	393	4421	2722
9850	481		97	112	5	41	57	2565	42	5	119	380	0	112	668	0	82	37		37	188	642	98
9851	591		117	41	5	44	86	4333	31	29	147	720	4	133	697	6	80	10		30	285	1365	440
9852	685		188	289	51	105	295	5770	57	138	295	1189	7	114	2082	2	34	14		472	482	4730	2139
9853	531		222	262	5	258	156	3614	32	52	200	753	4	123	682	4	67	18		400	421	2745	495
9854	816		80	164	9	206	200	3136	34	53	272	699	8	144	472	0	74	9		68	234	615	136
9855	629		140	139	15	24	148	4212	33	52	325	463	28	165	715	1	49	11		180	131	1430	393
9856	627		341	520	39	511	435	5218	91	127	88	1009	24	168	2828	10	28	13		251	704	4465	3359
9858	578		227	230	36	81	192	5223	29	18	307	634	8	199	1849	2	64	1		428	539	1902	804
9859	487		108	197	34	66	148	4613	79	34	198	1160	1	154	1478	10	55	9		283	190	1659	251
9860	427		105	73	1	155	97	3543	7	16	16	232	2	68	501	0	30	31		55	102	488	233
9861	433		151	166	1	301	232	3329	6	105	173	178	10	224	153	1	11	270		42	132	869	45
9862	582		138	69	7	244	339	2671	16	29	161	383	0	239	420	0	23	9		106	220	1054	384
9864	387		90	164	16	73	407	2815	10	8	90	329	2	115	222	0	24	8		17	69	542	120
9866	487		81	139	6	75	79	2276	6	94	100	503	0	86	570	3	66	7		173	240	1111	267
9867	630		303	445	30	492	193	2407	35	56	273	551	11	209	660	0	76	34		121	227	952	269
9868	520		89	29	0	128	189	1601	2	6	51	130	1	91	187	0	45	15		39	77	697	119
9870	908		168	72	4	130	119	3296	11	58	274	502	4	283	287	0	33	3		31	107	654	116
9871	550		95	50	9	223	208	2408	21	17	79	317	7	64	531	0	49	5		82	164	1437	2268
9872	550		106	148	15	215	178	3263	20	23	84	569	0	111	337	1	45	13		117	252	1289	277
9873	634		168	179	13	99	238	3593	21	61	344	896	20	176	707	0	45	17		80	216	1049	195
9874	440		72	77	0	136	81	1513	11	21	76	311	3	115	159	0	18	7		20	113	417	81
9875	655		162	229	5	307	208	2747	35	59	347	661	3	142	537	0	44	68		38	137	944	29
9876	406		103	22	0	221	202	3438	37	24	93	456	2	79	783	0	56	0		230	183	1247	611
9877	614		242	383	13	60	150	3055	6	36	108	335	4	146	415	1	46	11		36	139	1817	403
9878	688		163	300	12	121	260	3918	14	60	226	477	0	191	159	0	44	78		43	142	1068	54
9879	701		176	302	2	490	169	3630	53	54	314	379	5	200	75	0	30	14		0	2	600	137
9880	618		147	23	1	101	112	1195	11	11	82	132	6	89	238	1	71	8		3	14	903	288
9881	450		115	154	6	29	167	2809	25	11	108	276	0	99	125	0	39	38		11	42	830	165
9882	581		192	153	4	437	162	4100	25	74	179	544	0	214	598	3	61	17		127	218	1141	220
9883	612		177	236	6	120	291	2651	35	23	164	281	2	86	176	0	14	28		92	160	1097	82
9885	631		189	305	7	166	218	2968	19	62	264	709	4	234	410	3	35	82		106	223	1235	331
9886	781		300	259	31	698	315	5245	52	88	384	787	4	214	1462	1	82	37		114	332	3521	1047
9888	614		450	162	37	206	294	5923	118	301	446	1528	161	127	1558	9	42	2		228	276	7849	4081
9890	638		218	357	10	66	120	3530	29	33	87	409	4	95	647	0	119	31		47	164	1694	784
9891	590		417	403	89	260	886	6228	21	133	335	1347	21	140	2417	2	157	4		850	600	4125	6771
9892	599		361	88	17	106	239	4715	32	72	262	484	3	182	1069	3	46	31		350	392	2198	777
9893	672		376	601	114	701	391	6541	52	94	507	1585	34	125	2355	2	39	11		665	690	5389	2990
9894	687		270	414	25	384	280	4672	10	77	231	486	11	98	1474	0	73	25		234	339	2039	1175
9895	625		356	130	20	397	187	4559	21	69	152	883	34	256	1509	3	135	12		93	280	2500	1422
9897	694		333	108	24	112	375	4087	39	127	353	950	12	206	1528	0	186	18		476	459	1526	2092
9898	781		339	329	25	164	337	5644	28	353	569	659	15	232	1255	4	75	12		642	773	3316	1660
9899	1209		168	119	2	217	145	2469	23	115	195	466	6	234	279	0	35	8		22	95	699	157
9900	605		273	331	25	320	303	3556	60	68	311	679	10	403	761	0	67	29		1	0	1473	1033
9901	672		95	48	6	32	123	2601	1	60	57	222	1	106	82	0	17	0		16	44	745	686
9902	671		235	167	20	80	214	4824	35	52	147	933	26	138	2020	3	73	39		90	285	2899	1975
9903	589		130	111	8	42	102	3247	22	41	123	290	7	157	442	1	39	51		19	64	1288	100
9904	721		301	372	20	318	225	4634	61	59	207	813	31	201	1407	17	88	21		375	596	4001	1489
9905	1014		541	397	31	294	573	4275	21	62	648	607	8	538	858	0	59	2		408	593	2269	701
9906	652		174	83	4	178	250	2140	7	10	182	328	5	208	307	1	20	1		162	233	1448	347
9907	761		149	374	15	235	225	2675	11	47	193	430	4	144	328	0	51	7		171	245	961	220
9908	527		218	264	39	170	262	2482	59	133	266	447	8	314	515	7	148	16		198	292	1750	595
9909	561		107	257	11	189	278	1826	19	17	138	215	3	60	113	1	21	6		40	114	1234	357
9911	274		94	39	18	303	122	2620	49	15	63	452	1	80	95	1	140	2		7	46	1365	111
9913	607		62	44	4	48	75	2282	19	34	116	380	3	110	294	0	56	10		65	83	491	149
9915	431		222	171	11	74	189	4853	41	47	145	843	24	197	1855	1	95	25		382	402	2628	988
9918	603		104	133	6	60	156	2273	30	44	85	267	7	41	634	1	25	11		150	269	961	277
9920	795		130	186	1	60	233	1616	7	32	178	69	6	66	75	0	17	32		32	173	707	76
9921	650		244	178	4	156	269	2972	24	64	260	320	3	132	1049	0	43	6		189	335	1739	480
9924	395		176	109	3	137	180	3085	28	28	127	351	17	66	709	2	92	5		164	206	2945	814
9927	455		203	130	4	358	457	3263	24	64	222	297	6	100	642	0	13	11		203	394	1881	596
9928	610		212	435	24	211	306	4098	48	127	243	533	1	157	950	1	35	17		46	108	2382	280
9929	502		54	147	1	111	119	1440	16	10	49	98	5	29	98	0	12	8		37	70	904	64
9930	440		152	298	6	96	233	2113	9	30	115	211	3	73	763	1	47	7		50	100	1540	545
9931	556		118	63	5	57	101	1597	32	38	45	302	2	91	324	2	43	9		65	68	697	145
9933	430		100	106	1	162	158	1866	11	8	60	203	6	95	51	0	28	3		43	45	1035	405
9934	644		275	309	1	168	319	3601	22	111	226	660	19	249	1202	6	47	24		145	291	3373	733
9936	436		175	346	23	254	329	2805	8	42	148	344	11	76	517	0	41	14		35	118	1916	652
9937	443		226	104	4	78	191	7321	17	20	252	606	6	108	317	0	48	11		69	164	3039	389
9938	472		296	294	2	414	338	8369	42	59	303	931	9	102	1345	0	44	39		58	180	2142	831
9939	733		222	80	16	73	290	3640	30	44	244	711	3	176	1087	1	41	7		64	215	2007	775
9940	514		83	147	5	39	125	2013	5	7	140	338	0	37	107	0	8	14		13	68	1174	358
9941	528		184	147	1	255	354	2838	30	21	169	225	4	124	385	0	28	6		150	199	1938	311
9942	581		330	171	12	533	420	4331	50	314	350	591	6	175	1528	0	43	29		164	463	2134	1130
9943	443		232	276	6	73	288	3241	30	44	200	338	6	117	472	0	60	5		218	427	1497	372
9944	708		385	779	8	575	275	7304	108	105	390	1069	7	158	1865	0	21	49		14	5	1846	3987
9945	388		58	46	3	22	81	3176	2	6	24	193	2	65	272	1	18	3		10	44	1421	0
9946	404		141	227	18	129	278	4050	23	33	207	687	5	149	1068	3	65	13		119	220	2488	564
9947	222		3	0	0	77	64	1721	0	10	104	139	12	62	143	0	102	5		15	43	683	718
9948	504		72	76	3	36	98	1836	7	27	126	329	16	184	137	0	75	7		14	50	2095	199
9949	436		136	24	66	86	295	3453	45	21	83	598	2	214	464	1	52	16		55	133	2262	1284
9950	586		244	469	9	325	335	3522	14	48	216	363	3	86	603	3	61	5		99	282	1676	590
9951	488		101	86	10	126	125	2748	14	12	63	356	7	77	865	1	70	3		123	161	990	726
9952	465		68	73	2	137	208	2205	16	11	39	189	8	12	117	0	60	6		48	93	1299	788
9953	372		122	79	4	128	88	2847	50	21	75	363	28	121	542	2	73	29		166	148	741	319
9954	535		166	168	15	70	197	6887	16	58	141	525	6	205	684	1	58	6		255	268	1312	455
9957	617		184	194	8	249	208	3065	27	35	112	637	8	105	1360	10	94	11		267	261	2093	1153
9958	519		349	234	18	392	293	3866	73	70	228	1160	20	196	1951	11	118	9		961	869	3175	1134
9959	573		77	57	4	148	143	1748	23	21	48	195	0	46	341	0	34	4		83	47	972	243
9960	612		135	186	5	211	208	2407	20	31	101	157	5	89	105	0	26	4		112	160	1191	457
9961	489		301	599	14	522	408	4288	37	138	359	573	17	177	1041	0	21	16		117	238	3886	1633
9962	565		1	31	0	13	28	2304	0	5	10	413	0	1	95	0	27	2		3	32	561	67
9963	380		105	53	4	46	207	2331	14	17	127	216	6	68	122	0	52	18		31	147	1483	376
9964	396		164	115	16	209	257	2839	7	38	89	364	5	56	336	2	60	3		146	161	1653	656
9965	540		282	159	14	343	379	3413	28	47	177	486	7	137	1644	0	78	10		311	306	1632	1503
9966	552		248	98	2	268	288	3768	11	31	173	544	6	105	976	2	33	1		155	240	4035	718
9967	532		103	209	12	185	197	2067	25	45	149	141	2	152	255	0	25	9		23	60	1404	369
9968	766		131	135	0	147	300	4107	9	33	280	402	3	148	231	0	46	8		83	237	1157	266
9969	507		342	555	21	470	249	5327	50	61	256	1055	9	206	1347	0	108	11		99	301	3522	1143
9970	639		73	89	2	143	167	2188	12	20	118	225	4	41	249	0	29	6		63	119	876	160
9972	660		216	126	13	192	235	5097	12	50	271	550	7	165	782	1	76	6		107	205	1265	613
9973	442		24	20	0	13	10	1408	2	2	8	66	9	59	203	0	58	1		2	21	1023	384
9976	580		252	108	9	249	205	4814	62	79	199	521	22	178	1919	0	137	25		83	327	2127	1463
9979	537		189	103	3	218	145	2710	30	34	118	321	1	180	547	0	37	5		102	178	1555	285
9980	619		335	80	54	207	281	2374	15	70	406	571	17	177	653	0	54	10		310	410	1563	231
9981	411		191	273	3	211	176	4026	14	39	269	312	4	259	332	0	28	20		111	179	1064	365
9982	968		219	275	8	337	252	2804	20	56	250	332	7	248	859	0	48	7		91	326	1162	303
9983	613		290	288	37	94	292	6903	16	97	291	625	6	181	1439	0	106	24		400	549	2477	991
9984	768		243	136	14	107	138	2440	15	57	208	442	5	209	587	0	89	16		228	322	900	399
9985	464		24	31	0	34	128	1907	0	0	20	109	7	0	91	4	32	23		19	51	1588	191
9987	803		127	165	41	305	198	2205	4	43	174	550	15	116	417	0	103	13		35	105	875	326
9988	483		227	253	78	96	245	6963	41	73	181	2913	20	249	1836	0	135	17		267	332	2857	1967
9989	607		173	183	20	288	263	2418	18	80	292	486	13	98	291	0	157	12		137	330	905	138
9990	395		73	89	12	12	104	2258	6	24	81	89	10	81	141	0	17	1		1	0	793	311
9991	456		18	36	3	15	41	3323	31	3	30	473	0	24	100	0	26	5		24	71	1169	117
9992	544		370	374	110	124	433	4727	19	119	278	1366	5	385	958	0	121	8		74	223	4224	2180
9993	333		109	257	49	206	228	2190	7	40	147	451	7	175	651	1	72	6		89	92	2471	1360
9995	738		83	53	1	166	157	2293	12	25	135	188	3	96	232	0	31	13		10	77	978	156
9996	411		52	73	4	223	177	1248	17	17	29	246	3	80	159	0	39	5		47	97	968	561
9997	614		279	55	11	370	368	5916	41	59	376	1184	18	156	1568	1	32	13		486	515	1178	502
9998	563		138	147	0	199	179	2319	16	33	74	310	0	66	849	0	46	5		114	158	1279	857
9999	433		141	122	16	86	84	2931	17	19	65	286	15	39	670	3	20	5		159	172	1476	613
10000	464		319	318	4	169	228	3362	21	39	222	577	3	217	470	0	77	18		173	241	1584	264
10001	528		222	57	20	327	392	3382	15	17	220	1105	10	163	895	1	108	3		300	396	2524	1081
10002	544		160	134	16	62	174	6124	13	15	144	780	6	103	639	1	38	4		118	171	2037	616
10006	524		162	57	1	268	213	3814	7	28	64	272	5	114	551	0	108	20		122	204	785	400
10008	612		14	56	0	74	115	2321	0	8	19	131	0	46	85	0	38	7		7	60	879	371
10009	567		234	201	29	351	322	7684	33	104	181	602	10	203	852	1	112	17		247	207	1202	984
10010	536		282	104	14	59	198	4016	41	44	113	510	23	150	1864	3	136	17		352	371	1712	1193
10011	554		323	340	68	322	405	3569	18	78	263	626	5	242	741	2	82	7		178	202	3398	1286
10012	542		216	217	53	144	181	5097	20	153	147	1142	19	180	1106	1	83	7		198	348	2423	724
10013	521		540	666	137	491	414	8011	78	223	403	3191	24	592	2174	4	269	20		4	1	7623	1941
10014	624		292	201	48	229	220	3550	10	181	193	780	6	221	443	1	62	9		5	3	1389	397
10015	575		298	274	62	417	445	5784	40	65	191	1013	20	162	1173	5	83	18		395	372	2279	1630
10016	544		177	382	2	387	230	4067	30	32	217	312	8	91	277	0	80	22		74	140	1900	891
10017	492		100	213	6	167	180	3240	11	34	62	256	6	70	384	3	74	7		142	160	1158	864
10018	621		296	269	10	265	230	5065	24	48	353	654	25	264	1119	0	68	19		433	526	960	288
10019	585		175	82	17	231	195	2304	18	16	109	432	2	77	235	1	79	3		127	203	1601	486
10020	745		198	76	4	310	331	3307	17	63	307	716	1	192	248	0	43	13		171	138	881	186
10021	365		128	185	0	330	203	3930	89	17	88	435	7	53	450	2	60	44		105	244	1657	624
10022	856		127	250	1	247	161	3491	13	38	208	343	5	96	245	1	86	9		38	102	1184	298
10023	736		233	296	12	103	276	2646	34	57	289	373	5	306	370	1	83	38		248	444	1517	579
10024	629		539	771	42	709	493	3648	111	76	98	777	1	211	204	1	25	22		371	463	2556	1149
10026	627		349	169	39	72	215	2238	34	49	113	507	0	299	522	0	83	33		322	479	935	170
			AT1G29460
			65
			686
			250
			193
			427
			292
			249
			139
			60
			99
			320
			470
			482
			716
			118
			136
			207
			358
			315
			66
			149
			274
			194
			125
			315
			60
			373
			272
			278
			157
			121
			179
			150
			80
			266
			113
			262
			211
			342
			338
			123
			368
			380
			244
			496
			257
			191
			101
			279
			211
			300
			312
			327
			84
			183
			30
			351
			208
			48
			97
			324
			516
			115
			229
			238
			467
			153
			186
			671
			143
			182
			449
			459
			393
			444
			355
			416
			317
			180
			53
			174
			337
			122
			52
			52
			142
			295
			188
			149
			413
			185
			233
			223
			249
			120
			157
			152
			70
			178
			337
			265
			121
			349
			215
			94
			241
			335
			173
			237
			92
			189
			229
			169
			273
			221
			111
			299
			116
			87
			182
			97
			285
			132
			94
			99
			55
			79
			191
			92
			144
			288
			312
			285
			300
			205
			77
			210
			147
			288
			50
			326
			279
			255
			125
			211
			329
			80
			29
			195
			409
			75
			172
			152
			277
			477
			314
			285
			473
			336
			438
			168
			221
			95
			499
			374
			171
			390
			190
			469
			72
			110
			238
			84
			392
			116
			577
			142
			146
			171
			160
			296
			275
			198
			125
			139
			159
			307
			204
			224
			248
			229
			118
			155
			88
			177
			338
			274
			26
			270
			34
			190
			204
			233
			248
			555
			235
			69
			122
			255
			223
			86
			419
			213
			214
			244
			178
			424
			176
			65
			351
			174
			93
			556
			102
			470
			258
			218
			166
			436
			141
			205
			427
			344
			470
			371
			197
			172
			13
			292
			250
			114
			137
			163
			142
			57
			231
			196
			116
			287
			202
			136
			291
			80
			125
			219
			204
			127
			90
			265
			99
			370
			493
			399
			226
			472
			436
			383
			359
			351
			217
			209
			30
			157
			136
			55
			135
			239
			143
			264
			200
			162
			251
			258
			333
			308
			303
			428
			371
			290
			418
			296
			167
			177
			166
			137
			175
			90
			91
			208
			142
			97
			237
			231
			136
			594
			232
			147
			150
			131
			115
			167
			132
			109
			118
			237
			387
			235
			150
			121
			122
			282
			322
			179
			233
			255
			90
			288
			143
			211
			77
			184
			207
			224
			150
			135
			195
			98
			129
			157
			106
			195
			250
			264
			109
			80
			85
			104
			383
			96
			147
			198
			314
			218
			226
			353
			224
			257
			235
			304
			260
			409
			187
			162
			387
			134
			235
			199
			194
			188
			123
			195
			144
			160
			180
			106
			300
			283
			378
			217
			247
			117
			148
			281
			170
			146
			458
			495
			155
			357
			84
			296
			179
			312
			285
			181
			322
			210
			223
			440
			247
			152
			205
			284
			244
			204
			238
			244
			240
			150
			150
			189
			241
			167
			216
			80
			204
			93
			211
			224
			103
			109
			117
			209
			172
			136
			174
			276
			177
			412
			334
			373
			72
			122
			167
			235
			290
			245
			264
			324
			287
			206
			179
			101
			8
			163
			321
			171
			65
			96
			207
			186
			230
			209
			99
			179
			276
			207
			170
			156
			227
			230
			273
			142
			219
			234
			383
			158
			208
			133
			37
			216
			191
			71
			266
			310
			137
			84
			243
			222
			216
			60
			399
			81
			253
			317
			279
			338
			52
			177
			70
			219
			225
			151
			248
			382
			169
			255
			136
			313
			61
			325
			203
			130
			363
			336
			362
			230
			203
			157
			79
			189
			61
			211
			139
			306
			211
			171
			239
			253
			223
			244
			90
			317
			203
			229
			151
			306
			148
			102
			255
			152
			324
			195
			186
			220
			238
			330
			222
			295
			173
			93
			172
			225
			91
			275
			146
			306
			183
			318
			250
			222
			264
			257
			208
			223
			148
			206
			238
			145
			89
			146
			71
			195
			113
			187
			91
			65
			36
			342
			127
			114
			155
			283
			158
			71
			109
			103
			338
			245
			219
			253
			260
			152
			196
			97
			117
			188
			222
			80
			140
			341
			227
			108
			105
			151
			138
			90
			81
			303
			89
			168
			95
			106
			168
			72
			162
			103
			242
			163
			176
			147
			115
			192
			177
			189
			300
			450
			218
			417
			361
			376
			270
			356
			333
			339
			168
			273
			95
			235
			130
			301
			541
			174
			149
			218
			107
			94
			62
			222
			104
			130
			244
			176
			203
			212
			54
			152
			118
			100
			275
			175
			226
			296
			222
			83
			184
			330
			232
			385
			58
			141
			3
			72
			136
			244
			101
			68
			122
			166
			184
			349
			77
			135
			301
			1
			105
			164
			282
			248
			103
			131
			342
			73
			216
			24
			252
			189
			335
			191
			219
			290
			243
			24
			127
			227
			173
			73
			18
			370
			109
			83
			52
			279
			138
			141
			319
			222
			160
			162
			14
			234
			282
			323
			216
			540
			292
			298
			177
			100
			296
			175
			198
			128
			127
			233
			539
			349
			AT1G29460
			65
			686
			250
			193
			427
			292
			249
			139
			60
			99
			320
			470
			482
			716
			118
			136
			207
			358
			315
			66
			149
			274
			194
			125
			315
			60
			373
			272
			278
			157
			121
			179
			150
			80
			266
			113
			262
			211
			342
			338
			123
			368
			380
			244
			496
			257
			191
			101
			279
			211
			300
			312
			327
			84
			183
			30
			351
			208
			48
			97
			324
			516
			115
			229
			238
			467
			153
			186
			671
			143
			182
			449
			459
			393
			444
			355
			416
			317
			180
			53
			174
			337
			122
			52
			52
			142
			295
			188
			149
			413
			185
			233
			223
			249
			120
			157
			152
			70
			178
			337
			265
			121
			349
			215
			94
			241
			335
			173
			237
			92
			189
			229
			169
			273
			221
			111
			299
			116
			87
			182
			97
			285
			132
			94
			99
			55
			79
			191
			92
			144
			288
			312
			285
			300
			205
			77
			210
			147
			288
			50
			326
			279
			255
			125
			211
			329
			80
			29
			195
			409
			75
			172
			152
			277
			477
			314
			285
			473
			336
			438
			168
			221
			95
			499
			374
			171
			390
			190
			469
			72
			110
			238
			84
			392
			116
			577
			142
			146
			171
			160
			296
			275
			198
			125
			139
			159
			307
			204
			224
			248
			229
			118
			155
			88
			177
			338
			274
			26
			270
			34
			190
			204
			233
			248
			555
			235
			69
			122
			255
			223
			86
			419
			213
			214
			244
			178
			424
			176
			65
			351
			174
			93
			556
			102
			470
			258
			218
			166
			436
			141
			205
			427
			344
			470
			371
			197
			172
			13
			292
			250
			114
			137
			163
			142
			57
			231
			196
			116
			287
			202
			136
			291
			80
			125
			219
			204
			127
			90
			265
			99
			370
			493
			399
			226
			472
			436
			383
			359
			351
			217
			209
			30
			157
			136
			55
			135
			239
			143
			264
			200
			162
			251
			258
			333
			308
			303
			428
			371
			290
			418
			296
			167
			177
			166
			137
			175
			90
			91
			208
			142
			97
			237
			231
			136
			594
			232
			147
			150
			131
			115
			167
			132
			109
			118
			237
			387
			235
			150
			121
			122
			282
			322
			179
			233
			255
			90
			288
			143
			211
			77
			184
			207
			224
			150
			135
			195
			98
			129
			157
			106
			195
			250
			264
			109
			80
			85
			104
			383
			96
			147
			198
			314
			218
			226
			353
			224
			257
			235
			304
			260
			409
			187
			162
			387
			134
			235
			199
			194
			188
			123
			195
			144
			160
			180
			106
			300
			283
			378
			217
			247
			117
			148
			281
			170
			146
			458
			495
			155
			357
			84
			296
			179
			312
			285
			181
			322
			210
			223
			440
			247
			152
			205
			284
			244
			204
			238
			244
			240
			150
			150
			189
			241
			167
			216
			80
			204
			93
			211
			224
			103
			109
			117
			209
			172
			136
			174
			276
			177
			412
			334
			373
			72
			122
			167
			235
			290
			245
			264
			324
			287
			206
			179
			101
			8
			163
			321
			171
			65
			96
			207
			186
			230
			209
			99
			179
			276
			207
			170
			156
			227
			230
			273
			142
			219
			234
			383
			158
			208
			133
			37
			216
			191
			71
			266
			310
			137
			84
			243
			222
			216
			60
			399
			81
			253
			317
			279
			338
			52
			177
			70
			219
			225
			151
			248
			382
			169
			255
			136
			313
			61
			325
			203
			130
			363
			336
			362
			230
			203
			157
			79
			189
			61
			211
			139
			306
			211
			171
			239
			253
			223
			244
			90
			317
			203
			229
			151
			306
			148
			102
			255
			152
			324
			195
			186
			220
			238
			330
			222
			295
			173
			93
			172
			225
[truncated: 44,592 more rows]

## Sheet: AT3G24120
accession ID	AT3G24120		AT1G29440	AT1G29460	AT1G29490	AT1G29500	AT1G29510	AT2G23170	AT3G03820	AT3G03830	AT3G15540	AT3G23030	AT3G23635	AT4G10150	AT4G32280	AT4G37390	AT5G18010	AT5G54490
108	973		105	65	0	39	44	91	70	11	404	3643	3	115	105	7	138	194
139	931		660	686	114	259	286	996	673	307	1330	6616	21	152	2929	61	788	113
159	847		330	250	60	67	166	668	108	55	429	2438	0	86	621	139	0	61
265	1005		250	193	17	80	208	905	115	48	1003	4386	10	183	1215	19	32	133
350	965		1108	427	52	553	690	819	521	127	639	5879	15	93	835	93	99	64
351	858		602	292	5	440	357	782	148	76	517	3887	12	56	812	66	36	81
403	793		426	249	30	209	471	347	361	83	465	3763	4	130	539	18	63	214
410	848		150	139	48	122	146	829	113	35	1141	6801	4	67	1214	110	11	467
424	809		146	60	13	121	80	847	82	25	1157	5920	6	33	721	39	6	610
428	882		51	99	10	147	143	1435	94	11	2197	7785	10	42	1910	64	69	629
506	779		160	320	33	450	573	1591	331	27	689	4851	8	48	692	133	96	107
630	708		169	470	82	502	576	2951	548	227	2431	6183	23	65	2207	164	115	154
687	899		218	482	39	563	626	763	480	44	633	4461	7	72	1078	44	123	64
728	863		361	716	172	847	1066	3304	490	50	2177	6305	16	100	2980	231	231	123
763	990		196	118	8	241	151	235	80	13	225	1945	4	165	49	67	12	78
768	1075		91	136	28	173	203	602	184	14	770	3606	3	81	822	698	52	272
801	917		174	207	0	1	51	84	198	11	429	5119	2	99	244	27	0	165
870	782		132	358	87	416	492	2912	224	29	1712	4423	22	93	1933	212	80	134
915	921		808	315	31	373	425	1073	282	50	484	3546	7	73	933	53	65	53
932	825		45	66	5	28	49	7499	46	4	1383	4529	12	53	1150	281	8	473
997	622		182	149	23	50	150	207	156	27	587	3376	8	66	1535	40	9	294
1002	622		437	274	13	85	74	204	358	45	534	3588	2	83	441	54	45	179
1066	771		319	194	15	126	241	201	449	81	356	3490	3	150	513	29	34	195
1158	679		160	125	40	72	128	400	321	46	282	3378	8	23	926	71	30	182
1317	659		467	315	18	202	424	48	433	62	627	4047	1	140	771	0	65	81
1435	665		100	60	13	82	115	312	115	14	315	3451	2	52	156	446	52	98
1684	942		175	373	17	709	864	1048	304	20	483	4599	10	50	1117	97	142	175
1741	846		117	272	11	376	521	986	347	22	305	3148	5	31	294	79	90	68
1829	875		153	278	14	370	523	666	255	18	522	4266	9	46	570	94	0	113
1872	898		255	157	4	383	518	790	187	30	359	2957	6	49	316	155	112	78
1890	1084		132	121	7	161	186	386	118	33	122	2497	0	38	31	61	44	71
1925	1009		312	179	1	312	448	611	66	36	307	3245	5	38	123	111	141	130
1954	1005		80	150	7	251	468	828	47	21	356	2123	1	26	263	66	96	266
2016	882		161	80	2	278	339	278	21	29	193	2727	1	23	92	80	74	217
2017	811		140	266	25	494	697	1013	233	11	353	3060	3	31	1244	98	80	174
2031	755		84	113	38	342	577	1839	104	3	266	2444	2	3	455	272	38	128
2171	735		565	262	24	327	325	979	130	60	512	3933	5	32	343	148	59	214
2202	1022		347	211	4	351	361	447	88	43	291	3945	6	77	259	102	139	124
2212	840		166	342	24	413	577	1545	275	25	790	5306	13	46	1262	149	107	52
2276	760		156	338	20	403	521	926	324	88	723	4975	9	39	492	106	59	102
2278	913		113	123	15	353	520	978	81	5	197	2323	1	55	129	74	29	246
2317	760		508	368	29	358	289	1060	215	66	798	4425	18	75	1943	175	43	161
2370	948		202	380	25	589	651	1565	352	51	1049	5175	12	53	1495	113	116	69
4779	867		91	244	1	392	352	341	233	96	522	3686	7	63	1235	25	40	82
4807	802		430	496	84	207	435	999	525	200	1218	4925	24	96	2248	117	154	99
4826	855		274	257	28	153	308	838	504	108	974	4656	14	124	1235	56	76	63
4884	798		345	191	42	213	183	4070	147	56	1115	6512	17	46	1725	253	37	677
4931	752		186	101	1	247	284	773	135	38	313	3673	1	8	42	93	23	60
4939	860		314	279	1	444	521	583	192	49	306	2388	3	39	437	71	72	141
4958	892		114	211	24	296	351	613	230	85	645	3892	4	45	591	45	54	103
5023	847		274	300	4	399	412	581	50	25	340	2518	2	100	325	44	69	178
5104	806		475	312	22	343	337	1406	369	85	560	4621	5	24	378	223	14	104
5151	888		358	327	29	326	346	882	369	86	720	5099	6	108	477	72	64	213
5210	938		56	84	4	189	262	1005	46	8	204	1983	3	48	148	109	14	249
5236	796		177	183	0	253	254	602	136	49	271	4357	3	6	72	51	25	215
5276	718		140	30	1	84	140	307	50	11	632	4870	1	17	82	68	24	653
5279	875		350	351	0	400	450	1070	321	92	610	4607	7	40	630	101	86	158
5349	855		425	208	30	320	441	1290	151	51	686	2796	4	41	619	112	22	158
5353	784		103	48	0	182	137	201	133	4	388	2636	5	33	389	37	12	433
5395	894		43	97	2	45	214	347	67	15	78	2574	3	60	256	61	33	201
5486	827		597	324	23	363	324	849	242	72	561	3224	10	45	936	102	12	84
5535	764		153	516	19	635	528	1288	472	196	1836	4982	18	142	3523	66	136	94
5577	735		34	115	2	154	185	272	78	24	295	1538	5	65	669	51	34	41
5644	818		699	229	45	399	391	802	264	51	793	3220	9	132	897	110	66	99
5717	800		454	238	0	206	287	806	134	30	181	1578	4	69	295	96	94	265
5718	834		970	467	43	546	430	1155	461	237	648	4654	5	86	1272	233	120	138
5720	1176		141	153	2	250	196	157	183	130	590	8301	8	77	806	47	28	354
5726	1071		95	186	0	323	270	170	208	47	531	8628	7	56	980	34	42	645
5741	927		1258	671	58	794	807	902	431	169	1021	5289	32	112	2189	65	220	86
5748	1066		108	143	10	192	146	220	93	41	455	7837	6	38	932	47	87	697
5768	890		62	182	0	309	238	644	187	7	188	1857	7	57	327	52	32	64
5772	805		551	449	73	560	401	998	516	199	2594	4266	22	138	3610	91	62	142
5778	782		932	459	99	590	509	1874	354	193	2039	6317	30	93	2354	256	237	117
5779	803		497	393	74	226	667	1701	308	142	1571	6340	23	64	1767	157	126	154
5784	845		525	444	187	531	479	666	373	86	931	3709	5	102	2524	69	129	93
5798	756		321	355	5	467	426	932	256	115	974	3694	9	59	1268	122	120	137
5800	808		452	416	65	217	513	1284	507	173	1495	4693	29	119	2164	148	144	67
5811	832		275	317	69	385	329	1686	256	103	1453	4405	15	132	3100	106	86	148
5818	756		207	180	15	241	190	686	116	46	471	3021	1	57	605	129	42	58
5822	1062		38	53	28	69	59	4147	38	56	1251	6136	24	62	3137	270	2	758
5831	762		96	174	28	391	281	419	240	24	587	3451	5	43	1016	41	30	75
5837	1018		414	337	27	163	336	363	489	85	696	4864	10	76	1507	14	251	169
5860	733		115	122	12	38	103	152	103	21	237	2181	1	38	352	15	45	236
5874	847		17	52	14	26	50	2073	44	14	1803	9623	12	63	1925	64	14	909
5890	907		17	52	44	77	64	3399	62	14	2372	8526	5	41	2155	91	28	743
5893	872		128	142	6	217	78	439	69	21	237	1773	4	170	332	94	41	45
5907	915		332	295	15	324	179	581	167	76	246	2957	6	241	1368	128	46	52
5921	768		185	188	5	222	120	300	90	17	202	2199	1	184	1066	73	68	68
5950	902		198	149	3	236	229	475	167	30	222	2461	3	145	625	83	26	58
5984	861		394	413	11	401	173	371	220	44	492	4979	10	197	1875	42	119	194
5993	745		204	185	5	309	188	364	92	28	387	3716	5	137	1492	65	21	202
6008	682		33	233	25	92	137	584	55	23	144	2112	4	85	440	130	58	74
6009	686		100	223	12	350	305	229	194	189	518	2471	3	87	544	40	29	224
6017	709		317	249	7	273	315	659	312	211	516	2975	11	39	608	118	31	195
6020	919		99	120	4	35	184	303	189	43	411	2585	4	94	475	45	22	189
6024	719		128	157	4	40	127	301	197	28	538	2816	7	29	784	20	40	144
6025	757		44	152	3	167	132	771	86	26	342	2361	13	28	598	133	19	312
6038	662		66	70	4	67	80	532	67	6	333	2316	4	24	367	375	9	168
6041	667		159	178	11	41	202	103	127	37	358	2371	2	23	519	30	41	139
6064	972		222	337	22	84	241	296	303	217	914	3097	4	414	1433	28	149	90
6086	975		251	265	14	39	170	339	337	55	962	4584	0	71	1920	47	77	164
6097	940		32	121	12	240	240	199	185	32	297	2325	8	61	371	39	9	119
6099	917		154	349	1	0	27	265	453	42	848	6145	1	37	477	63	30	186
6106	764		257	215	6	214	246	130	250	21	468	3041	1	53	558	9	43	223
6107	721		141	94	14	26	80	160	169	52	197	2524	7	55	288	58	32	245
6108	1109		68	241	7	363	315	120	474	27	648	3752	4	129	764	16	63	51
6111	811		244	335	32	96	234	92	307	43	278	2557	0	115	755	2	60	270
6133	912		142	173	5	57	129	121	161	21	462	2455	4	61	385	4	25	146
6137	769		151	237	23	121	224	269	250	33	587	3295	1	135	347	20	22	155
6138	665		118	92	4	144	177	340	66	9	304	2646	10	50	220	33	16	122
6140	704		142	189	22	279	266	100	77	32	327	2513	1	55	512	5	19	284
6145	766		161	229	11	260	282	71	167	30	205	2534	1	71	381	11	26	261
6148	956		146	169	12	47	233	427	273	51	303	2663	11	87	204	145	27	189
6154	825		71	273	12	209	270	322	118	29	538	3111	7	63	815	45	50	540
6163	730		77	221	5	216	194	506	76	26	489	3274	5	24	754	100	38	345
6166	1117		46	111	1	147	101	379	100	15	329	2404	2	72	75	39	8	391
6169	783		320	299	12	257	301	157	181	148	329	2947	3	112	292	8	40	118
6171	768		252	116	0	375	198	157	63	124	142	3598	0	114	52	26	12	249
6174	881		123	87	1	122	190	123	66	107	236	2756	3	111	90	21	11	132
6177	798		206	182	0	184	226	70	44	19	232	2672	0	100	182	1	14	192
6194	690		258	97	3	232	104	903	60	35	451	3666	1	26	572	53	19	543
6195	777		183	285	6	290	146	856	86	27	482	3825	12	46	1484	23	49	111
6198	1002		122	132	6	108	112	307	163	29	270	1894	5	58	263	21	12	64
6201	799		74	94	1	153	118	150	79	18	171	2604	0	57	93	9	25	213
6203	833		133	99	2	104	92	1804	16	13	194	1914	2	36	194	601	42	168
6217	738		55	55	2	46	54	1132	25	41	690	3224	2	36	566	82	17	905
6218	913		32	79	1	167	103	312	69	61	330	2281	3	66	387	13	15	231
6220	883		167	191	15	207	188	1589	78	33	796	4383	8	89	1601	460	31	140
6240	1045		75	92	2	97	92	194	51	20	323	1873	7	47	435	23	24	195
6241	957		127	144	0	219	174	469	111	32	505	2762	10	108	896	21	67	253
6255	802		229	288	16	62	221	290	172	29	287	2809	5	142	292	37	30	74
6268	922		568	312	0	365	244	297	209	18	604	5100	12	245	833	1	27	290
6284	1117		95	285	26	176	295	491	320	70	688	4206	7	142	1220	4	67	185
6296	900		292	300	40	362	183	321	161	110	369	3278	9	281	1768	101	88	82
6390	868		38	205	8	236	175	373	83	44	411	1945	1	111	1221	22	60	70
6424	1029		51	77	6	35	126	542	69	41	879	2512	1	92	1378	49	22	49
6434	1255		220	210	1	220	96	771	101	53	548	2591	1	35	990	59	25	54
6445	850		189	147	4	226	133	234	77	14	197	2797	2	118	545	68	13	302
6680	983		310	288	24	306	209	2021	340	121	993	4199	10	150	1204	63	278	155
6709	739		74	50	2	43	243	527	24	8	176	1480	0	18	55	45	0	183
6744	1108		215	326	1	1	40	181	394	40	696	4239	0	118	330	6	0	290
6830	1261		429	279	17	559	437	750	288	57	1169	5519	3	88	1109	82	134	93
6900	767		367	255	14	353	396	270	224	41	415	4139	3	25	485	31	49	124
6906	1080		39	125	4	159	130	456	90	18	377	2948	10	55	626	58	31	172
6907	766		205	211	5	320	255	299	264	30	219	4226	3	80	950	91	29	692
6908	763		310	329	31	155	403	1444	333	134	837	4415	9	68	596	100	6	102
6909	649		80	80	31	227	119	11825	15	2	407	3503	3	72	170	7256	20	144
6911	811		15	29	7	91	78	1925	48	21	1888	6016	0	37	476	77	16	339
6917	644		208	195	16	182	248	281	140	167	555	3161	3	37	343	32	31	381
6923	758		169	409	33	468	584	1591	358	146	2282	5676	15	98	1383	106	125	132
6933	758		46	75	2	87	51	8488	51	59	503	3081	33	31	827	348	8	596
6937	1045		116	172	23	216	136	354	145	39	405	2699	13	32	534	47	11	91
6939	917		306	152	6	286	247	430	172	58	337	3340	5	66	636	117	38	120
6943	818		131	277	9	410	434	1102	251	61	1150	3827	6	67	1559	112	43	188
6944	846		682	477	41	532	398	4400	486	134	838	4841	12	87	1133	1681	68	119
6957	878		250	314	17	341	159	381	110	41	381	2508	3	163	1267	62	42	34
6960	697		215	285	22	84	193	818	144	47	405	2483	8	126	722	323	230	154
6966	844		805	473	18	521	360	1218	336	148	1837	6225	14	122	2157	123	0	145
6970	1130		98	336	4	345	454	106	687	106	865	5677	2	153	781	14	67	110
6971	803		397	438	53	253	484	759	603	166	985	6424	15	100	1868	120	27	139
6973	784		74	168	14	78	227	451	188	46	552	4289	5	70	772	93	18	381
6974	922		73	221	36	117	236	1148	198	67	667	3939	4	112	607	13	86	91
6976	702		52	95	4	83	171	494	113	16	332	3571	2	21	285	90	10	196
6979	1422		475	499	19	215	309	682	515	83	1045	6542	6	210	465	176	105	153
6989	1181		207	374	8	738	544	802	508	87	587	3642	0	177	1038	33	35	147
6992	881		32	171	14	212	239	661	167	37	369	2420	16	24	738	143	14	64
7013	1130		414	390	39	569	607	500	426	129	1042	3779	8	105	1646	57	85	46
7028	1118		530	190	5	600	281	255	226	51	221	2811	5	85	253	31	24	161
7033	775		222	469	36	549	872	1366	312	23	1534	6666	20	46	1463	147	122	75
7058	771		98	72	4	105	152	497	80	42	191	1635	4	64	289	81	12	193
7067	659		36	110	3	212	185	641	106	24	288	2664	6	24	500	133	30	540
7094	904		642	238	2	305	505	460	179	48	369	2987	0	22	396	66	99	148
7102	897		137	84	4	43	214	1934	143	43	602	3597	3	81	672	89	31	134
7103	669		110	392	3	381	375	947	165	38	359	5276	11	204	358	184	65	125
7106	846		224	116	5	341	226	464	114	9	376	2042	1	93	236	1243	51	144
7107	915		809	577	16	601	420	131	428	84	419	4899	3	211	465	13	41	932
7111	895		503	142	12	257	358	643	161	30	532	3577	6	33	376	74	52	498
7119	1349		87	146	8	204	188	663	190	35	397	1776	0	30	343	142	4	69
7161	943		59	171	8	62	188	117	175	24	445	2671	0	101	97	21	20	180
7164	896		128	160	5	167	176	79	65	77	228	3888	0	192	228	7	49	103
7165	888		490	296	28	723	639	236	502	91	713	3927	0	269	424	36	130	345
7167	1047		392	275	51	488	413	2941	322	170	797	4858	11	452	1094	409	85	96
7169	971		290	198	11	83	163	159	112	32	431	2920	1	80	477	14	16	475
7186	1030		147	125	3	85	161	78	124	24	767	5043	12	37	67	3	0	204
7202	1084		25	139	23	76	135	920	174	43	462	1856	6	55	246	348	55	32
7218	882		199	159	0	220	164	401	117	29	340	2691	2	70	305	77	14	303
7231	842		334	307	17	413	468	456	220	54	501	3449	8	59	720	76	74	126
7244	767		714	204	41	497	605	532	160	36	531	3184	0	141	421	71	24	321
7248	928		82	224	6	403	443	874	155	2	801	3831	7	72	618	41	27	162
7250	1103		373	248	5	604	268	123	213	16	207	2567	2	418	193	6	49	111
7263	1068		170	229	9	214	191	104	231	46	405	1750	3	71	537	36	36	36
7282	1278		191	118	6	164	198	611	79	11	246	2072	7	53	278	489	62	56
7288	874		338	155	11	292	254	478	168	61	304	3987	9	129	550	93	102	220
7296	901		19	88	7	190	252	808	37	10	110	1921	5	34	90	84	6	148
7308	864		434	177	23	245	255	480	144	24	620	3527	3	43	281	50	41	569
7316	935		115	338	2	253	329	817	101	59	671	3633	4	70	766	21	51	154
7320	594		326	274	3	632	402	640	236	41	506	2856	4	60	1545	82	58	892
7322	869		28	26	47	39	33	2517	39	13	2798	8384	9	26	1378	110	11	759
7327	970		127	270	30	335	262	1255	169	36	1621	4483	8	91	1485	112	15	197
7328	858		24	34	9	20	23	2259	53	14	3549	7907	6	52	2493	48	5	1224
7330	628		45	190	17	83	117	741	121	22	426	1742	4	57	943	286	1	812
7346	882		250	204	11	288	247	1412	161	76	981	4025	19	53	1755	34	53	98
7350	648		212	233	5	299	244	339	194	28	433	2521	4	68	827	34	22	299
7353	714		83	248	4	383	409	257	218	69	511	4052	10	113	1485	11	69	122
7354	1174		601	555	22	572	310	708	467	147	915	5216	11	94	2193	24	100	81
7355	616		66	235	9	81	155	298	352	78	316	2751	17	74	663	42	27	252
7372	879		107	69	26	105	71	1194	49	11	1414	5940	7	97	2050	62	30	945
7373	779		312	122	27	165	168	675	102	27	689	4166	4	54	782	77	0	416
7377	899		96	255	11	371	390	536	358	16	665	5302	2	80	1403	17	60	70
7384	585		258	223	2	7	73	492	240	67	876	3607	3	60	1248	74	55	449
7396	672		95	86	16	81	86	1485	83	16	1580	4726	9	14	592	182	42	642
7404	1087		618	419	9	507	582	427	548	143	1496	5692	5	161	1451	12	83	315
7413	961		229	213	10	191	142	210	146	37	563	3715	3	70	774	66	22	675
7418	803		104	214	0	0	17	1567	136	41	2508	9352	4	75	1432	105	0	483
7424	694		235	244	44	481	308	4496	151	62	831	3954	39	93	1624	1618	32	77
7427	1128		305	178	13	321	222	841	565	63	620	4074	10	169	1784	112	9	96
7458	1243		377	424	11	264	234	515	274	31	431	3322	2	112	1636	107	19	85
7461	888		181	176	5	184	101	255	75	30	142	2077	2	138	198	75	41	61
7477	989		308	65	88	81	112	5059	57	13	3364	8740	11	59	4383	198	41	1009
7515	795		156	351	7	422	585	1846	252	8	1305	4874	11	115	1854	107	62	105
7517	1278		320	174	7	267	264	97	248	35	454	3439	4	173	375	12	33	64
7521	1052		110	93	11	227	151	368	189	74	522	2283	11	37	490	350	10	51
7717	886		714	556	158	784	597	1724	658	279	2824	7291	39	186	2460	70	495	138
7917	939		24	102	18	155	125	8270	61	5	860	3784	37	50	1620	191	58	309
8077	825		189	470	23	452	695	761	379	77	579	4271	7	146	927	91	63	188
8132	738		465	258	44	287	279	1487	164	67	645	3912	15	120	542	236	82	75
8231	793		384	218	23	112	341	731	166	66	320	3435	0	61	419	69	40	120
8233	848		100	166	25	362	575	1029	90	2	522	3068	12	29	1330	155	37	190
8234	812		539	436	76	267	453	1254	421	107	1715	5272	17	39	1241	78	103	134
8235	761		135	141	1	192	120	662	82	17	941	3842	4	107	562	45	53	384
8236	741		54	205	24	172	228	231	196	48	239	2549	5	137	375	131	75	108
8238	777		475	427	252	466	577	2981	413	202	2943	6475	12	65	1709	190	108	107
8239	1258		76	344	29	369	575	813	459	87	1376	4040	10	322	1879	146	22	24
8244	802		362	470	115	437	384	2286	236	84	4692	6550	21	112	3176	124	120	124
8246	962		305	371	131	297	483	1234	293	112	1470	3818	9	88	1116	162	35	67
8247	763		161	197	17	179	233	259	140	45	437	2900	0	70	478	50	40	273
8259	766		212	172	19	98	238	491	277	81	339	2650	7	85	508	58	19	113
8264	929		15	13	11	71	61	2559	36	16	2330	7790	8	30	1594	113	14	727
8266	930		296	292	13	88	354	289	224	114	327	3106	2	66	261	51	131	135
8275	1268		67	250	5	248	232	197	125	30	479	1962	5	46	673	181	0	23
8284	952		56	114	0	122	178	720	154	50	142	2404	7	46	192	134	25	125
8290	800		121	137	13	220	190	415	204	52	469	2927	7	48	899	47	37	114
8297	858		167	163	15	92	250	562	247	94	447	3655	12	19	260	60	37	91
8325	953		256	142	5	316	166	341	317	46	261	2042	4	74	258	52	31	265
8334	796		203	57	0	188	158	317	106	17	474	3135	3	60	297	115	12	295
8337	618		204	231	47	105	204	199	284	64	390	3163	22	106	1386	53	32	1124
8343	824		301	196	34	86	345	528	215	34	988	3168	5	130	1311	38	38	198
8351	1061		175	116	5	151	208	317	109	36	332	2249	0	49	483	108	35	169
8353	850		334	287	33	101	252	192	171	37	599	4811	5	154	124	18	39	64
8357	936		107	202	4	201	137	804	66	35	633	3676	0	119	1788	135	17	202
8365	785		158	136	4	241	146	419	123	23	230	2328	4	51	500	77	29	100
8366	921		449	291	16	435	318	414	292	76	590	3992	9	69	1000	33	201	87
8378	918		102	80	20	91	111	2976	51	25	2261	7121	14	47	3002	195	31	597
8386	748		45	125	15	55	132	410	42	11	376	2939	1	50	372	14	43	511
8419	812		92	219	48	269	343	2742	167	26	2800	5444	20	78	1160	220	1	140
8424	740		54	204	43	323	355	321	209	73	775	4411	5	90	355	74	78	163
8428	834		210	127	2	146	104	483	56	15	117	1287	1	105	172	144	14	66
8430	802		164	90	0	164	187	560	139	33	212	2167	2	15	135	111	24	81
8472	847		156	265	4	261	203	805	87	26	450	3865	34	54	1045	390	76	193
8584	831		32	99	1	203	182	61	59	3	281	2347	1	71	157	9	34	91
9067	784		299	370	73	303	271	2197	251	242	1014	3857	10	121	517	250	40	85
9075	748		549	493	42	558	528	2996	381	192	3037	6940	20	85	2070	221	92	186
9078	790		346	399	24	462	332	2136	352	141	999	4927	12	81	813	125	73	148
9079	853		79	226	16	254	257	866	187	71	450	2956	4	121	325	61	40	137
9081	773		425	472	151	451	530	2586	387	162	2193	6702	17	102	1230	230	108	207
9084	862		420	436	65	497	425	1209	454	171	2265	8111	13	144	1463	80	41	161
9085	798		361	383	50	463	376	1571	340	132	1545	7620	11	146	1498	186	44	179
9089	937		350	359	54	155	369	1579	262	41	989	7221	18	88	1387	112	78	270
9091	692		279	351	42	276	178	1471	205	89	666	4167	7	101	610	135	36	781
9095	836		157	217	33	91	173	1322	162	80	1416	4816	9	55	1088	93	39	626
9099	930		251	209	39	409	281	11	233	104	611	3357	3	132	482	112	50	405
9100	1076		50	30	13	20	53	2693	47	32	3342	10699	22	71	2023	62	9	1041
9102	997		132	157	31	52	134	2094	134	32	2495	6039	10	79	1417	81	21	851
9103	736		146	136	71	121	153	1822	116	38	1441	4615	13	57	727	112	36	971
9104	1013		72	55	9	31	73	1490	53	18	4154	9625	4	107	1360	40	18	718
9105	1244		113	135	20	34	124	2452	232	98	871	4411	7	61	823	152	26	269
9106	788		218	239	45	65	214	991	248	77	1276	4420	14	69	639	64	68	817
9111	770		144	143	32	59	122	1951	136	43	1312	4712	5	98	985	107	16	1049
9113	788		268	264	33	83	243	2048	252	73	2694	6115	14	125	1843	122	56	803
9114	650		148	200	26	52	161	1068	170	40	859	3921	4	75	336	47	16	503
9115	669		135	162	19	46	166	1244	116	29	752	3776	3	64	346	57	10	603
9121	882		291	251	125	304	316	1789	232	98	1426	6667	12	79	918	249	113	350
9125	965		246	258	107	317	317	2561	84	61	1839	6101	16	105	1491	184	143	245
9128	963		381	333	181	426	495	1925	366	120	3260	8639	20	194	2064	158	205	436
9130	871		334	308	170	433	467	2361	326	120	2489	5879	19	208	1350	181	181	141
9131	832		299	303	154	310	447	1437	259	83	1309	4250	6	161	1184	245	143	133
9133	818		467	428	153	424	633	6029	164	131	2552	5739	32	129	1752	479	147	105
9134	944		348	371	177	408	484	4818	149	98	2460	5392	24	157	1873	577	160	92
9298	796		109	290	14	375	421	920	266	96	588	3286	7	98	722	114	74	143
9312	886		511	418	20	702	665	1394	422	235	1080	4995	17	119	1456	64	64	111
9314	765		106	296	13	324	400	1938	190	133	1105	3771	27	82	1630	262	80	94
9321	708		171	167	4	166	236	229	97	120	368	2771	5	91	553	17	21	274
9386	1019		185	177	6	306	222	90	187	40	467	3292	6	98	254	10	18	116
9388	819		153	166	2	220	181	125	85	73	423	2683	5	42	452	3	15	140
9404	712		141	137	12	164	235	493	137	14	360	2204	1	28	283	102	30	142
9405	658		147	175	18	193	276	388	100	21	382	2732	4	26	430	68	29	200
9408	588		84	90	5	26	214	545	40	7	226	2131	3	22	193	99	8	261
9409	702		108	91	9	30	115	335	119	26	259	2127	6	4	446	192	38	203
9421	1084		21	208	0	95	127	132	256	15	692	4521	0	25	309	10	19	89
9433	815		126	142	8	58	144	119	137	72	237	2668	3	150	446	20	42	199
9451	678		179	97	12	149	148	182	78	20	167	3000	5	49	381	39	2	204
9503	865		192	237	14	178	221	301	256	53	473	2730	1	48	1458	34	26	124
9506	1108		228	231	8	356	281	1041	259	76	917	5235	8	119	1905	73	26	120
9507	1036		85	136	7	34	90	139	137	0	298	4813	0	242	109	28	16	331
9508	1070		1088	594	62	158	483	1466	643	145	1356	6136	11	96	3173	101	97	92
9509	945		651	232	31	79	201	1113	116	34	928	4952	2	122	822	77	63	352
9510	913		224	147	0	248	146	310	105	16	488	3631	0	115	510	18	62	133
9511	997		208	150	15	77	221	464	167	21	722	5751	7	89	609	40	61	189
9512	966		217	131	0	229	150	730	41	26	753	4616	18	40	841	222	13	192
9513	1011		233	115	39	115	91	536	135	27	888	3488	1	126	506	21	98	139
9514	1089		291	167	2	318	151	386	147	30	441	3822	2	99	629	35	149	139
9515	877		253	132	5	177	134	1304	96	22	828	5474	0	85	698	759	18	232
9516	823		202	109	5	219	138	590	94	28	1045	4084	3	131	585	10	42	168
9517	1102		33	118	0	47	149	549	61	26	283	2471	0	50	91	246	20	80
9518	606		102	237	14	279	248	226	173	41	709	4049	1	139	775	2	66	143
9519	868		386	387	55	157	433	228	340	86	925	6773	5	95	1941	27	127	323
9520	843		255	235	44	132	285	405	355	159	656	4751	7	84	612	58	131	722
9521	671		229	150	7	88	156	631	137	26	474	3702	0	40	276	306	40	595
9522	949		331	121	1	301	273	1025	197	32	816	4642	21	109	402	119	63	111
9523	777		144	122	10	39	133	565	222	66	506	4418	5	92	871	123	28	179
9524	808		301	282	29	107	223	203	450	74	1010	7800	6	217	1963	30	62	137
9525	1019		60	322	14	358	348	861	391	244	965	7093	9	138	1008	42	25	173
9526	866		92	179	6	367	427	513	255	28	820	3743	6	90	421	95	19	221
9527	1013		232	233	6	51	171	533	194	44	374	4292	6	123	274	26	92	92
9529	763		250	255	1	277	190	720	170	21	685	3265	15	114	1091	202	51	644
9530	741		81	90	2	150	112	372	133	20	352	1989	15	141	752	65	13	512
9531	1090		245	288	0	184	224	44	208	50	227	2986	0	152	202	1	40	66
9532	787		233	143	0	59	143	590	180	22	471	4840	7	58	487	84	43	236
9533	720		124	211	12	41	493	390	171	49	291	3394	10	55	396	101	39	191
9534	730		102	77	2	165	112	444	82	37	553	4480	8	121	341	52	8	138
9535	779		40	184	3	219	240	497	205	37	762	4819	9	146	982	27	45	115
9537	745		225	207	4	355	236	349	198	19	434	4061	18	81	582	45	57	445
9538	931		163	224	38	213	252	1523	229	67	643	4321	10	72	1205	180	43	96
9540	699		179	150	7	201	169	546	172	113	745	5048	15	62	792	6	43	320
9541	697		169	135	8	57	146	1736	222	43	715	3958	7	82	689	182	29	353
9542	664		124	195	13	65	449	915	150	28	551	3793	0	37	283	112	39	137
9543	686		1	98	5	276	228	966	130	51	411	5559	14	54	805	140	48	48
9544	813		169	129	33	80	71	200	127	21	310	2706	4	114	353	51	21	40
9545	809		297	157	6	45	94	590	113	33	565	3546	17	119	206	57	52	166
9546	901		28	106	1	265	146	200	47	10	271	3290	1	160	29	102	9	216
9547	878		148	195	2	225	176	177	258	26	476	5363	1	60	240	3	7	583
9548	980		217	250	1	294	222	246	182	88	708	6110	2	69	323	2	30	467
9549	1179		700	264	27	110	198	264	306	52	560	4653	8	46	238	4	21	84
9550	754		212	109	1	154	117	1200	127	31	718	3547	1	52	737	171	9	173
9551	1043		18	80	3	20	97	194	82	24	291	2793	0	112	113	31	49	297
9552	931		150	85	25	40	114	802	94	33	690	4096	2	49	241	42	61	182
9553	851		197	104	1	31	99	1086	136	35	485	4591	1	75	816	115	37	106
9554	635		454	383	25	67	139	670	218	43	586	4293	7	42	820	223	103	329
9556	1010		55	96	3	204	143	413	224	33	661	3837	11	64	688	46	13	125
9557	1107		81	147	0	216	202	434	298	162	671	3893	4	192	950	28	47	306
9558	978		221	198	31	132	267	1060	263	240	1017	5672	9	72	2124	156	61	76
9559	918		456	314	0	53	52	123	239	45	796	5451	3	156	955	15	44	149
9560	1015		224	218	9	176	291	509	284	70	1247	7015	18	79	1978	38	64	90
9561	875		205	226	12	114	256	262	403	93	620	4230	8	199	431	32	119	185
9562	1085		277	353	13	698	331	1445	550	317	1711	6985	13	92	2692	69	95	299
9563	821		242	224	2	327	329	450	264	99	660	3649	1	121	465	365	132	135
9564	1085		77	257	18	485	498	850	371	90	960	4196	12	155	622	9	43	100
9565	786		238	235	46	65	242	1020	161	66	752	4709	1	61	1919	61	85	96
9566	1213		71	304	9	101	290	187	135	67	608	4739	1	184	1032	9	70	60
9567	1190		141	260	11	460	280	631	292	230	821	4366	5	216	1204	9	74	39
9568	898		357	409	32	128	425	1078	351	119	1137	5820	9	159	2185	43	51	119
9569	1010		204	187	27	330	299	2331	269	66	946	4324	25	96	1296	336	75	157
9570	814		100	162	5	191	128	358	192	58	654	5078	0	150	296	16	57	154
9572	732		91	387	13	482	400	598	361	219	770	6082	33	108	984	79	103	549
9573	752		33	134	4	206	108	535	109	13	189	2798	9	83	416	47	24	548
9574	923		479	235	17	193	409	476	373	94	405	7058	2	106	428	58	61	37
9575	942		67	199	20	108	228	33	189	37	319	4427	11	108	116	3	30	111
9576	971		312	194	5	90	219	262	233	97	316	4406	1	131	215	29	96	275
9577	819		176	188	2	287	239	370	146	53	486	5185	1	180	444	43	30	279
9578	1215		256	123	12	244	173	158	152	25	297	4098	0	138	216	21	64	89
9579	1030		37	195	4	67	202	388	251	51	578	4981	5	176	375	22	30	58
9580	1247		249	144	3	56	156	290	262	23	560	5176	0	119	373	11	101	202
9581	956		59	160	0	245	196	234	110	36	615	7184	0	85	308	22	22	261
9582	1117		172	180	10	372	203	891	278	74	837	5984	10	129	671	39	44	188
9583	1031		83	106	1	241	333	517	262	54	460	3235	7	42	866	39	122	48
9584	816		55	300	52	151	360	200	190	56	768	4901	6	124	921	58	70	318
9585	998		71	283	14	355	306	1030	273	92	471	4824	2	56	150	15	77	314
9586	940		594	378	3	445	139	343	283	71	563	4039	3	90	611	42	56	79
9587	966		126	217	23	133	284	169	290	46	1077	5222	7	89	731	4	12	227
9588	743		191	247	1	444	576	555	249	83	336	3358	1	144	245	3	29	143
9590	976		82	117	1	14	44	342	159	38	370	2259	8	47	91	123	9	198
9591	901		114	148	24	46	174	673	156	66	638	4038	2	89	832	107	60	823
9592	996		109	281	23	192	339	236	296	49	543	4418	11	78	673	73	20	411
9593	947		130	170	12	231	226	184	135	27	576	4038	4	118	507	16	106	939
9594	1055		94	146	5	243	190	508	239	101	607	4595	10	86	1004	25	26	142
9595	866		264	458	11	141	366	190	229	65	712	6729	21	102	740	115	146	371
9596	1026		624	495	90	114	346	460	381	102	1336	5543	5	79	1861	63	119	159
9597	809		309	155	10	123	187	119	193	77	654	4904	10	126	461	27	49	570
9598	824		815	357	26	132	225	113	708	77	504	4478	9	84	475	5	160	358
9599	931		219	84	1	48	141	490	246	25	486	4349	14	72	245	109	0	474
9600	771		405	296	26	60	166	1258	218	58	758	2723	32	63	637	239	158	605
9601	900		198	179	4	295	195	1085	141	33	591	4832	6	62	1176	166	28	128
9602	1149		510	312	90	475	402	2828	340	147	1514	6155	9	199	2994	256	141	131
9606	942		255	285	25	292	238	355	116	47	293	2885	4	258	1224	65	90	29
9607	967		164	181	6	186	210	320	117	80	270	2973	2	53	886	109	61	197
9608	869		425	322	9	366	262	288	107	38	186	2576	1	234	1031	50	98	42
9609	1016		191	210	15	302	240	393	156	36	410	2823	3	195	1513	225	86	220
9610	845		281	223	23	550	406	1840	151	73	505	3221	7	40	1464	255	109	86
9611	1045		224	440	8	547	272	147	236	52	210	3185	3	526	560	46	114	171
9612	1093		199	247	21	331	181	420	195	54	422	2432	0	186	1359	150	173	38
9613	1027		111	152	3	187	168	423	78	18	257	2654	3	38	897	52	23	76
9615	925		287	205	13	261	271	665	159	36	244	2568	3	56	238	153	42	78
9616	858		318	284	17	328	300	360	189	70	492	2905	5	135	289	90	94	337
9617	961		191	244	13	79	161	377	212	36	297	1822	6	135	318	101	61	122
9619	958		179	204	11	65	189	310	195	53	579	3432	4	237	634	57	39	329
9620	951		247	238	18	78	199	268	236	57	518	3336	4	329	642	59	116	217
9621	995		186	244	24	102	184	230	229	87	892	3902	10	443	1013	60	185	101
9622	934		100	240	6	115	258	460	196	55	226	3679	1	214	1196	126	52	113
9623	970		95	150	4	259	197	226	142	19	120	1716	1	352	72	56	47	73
9624	881		85	150	8	155	144	123	190	36	513	1888	5	190	573	35	80	138
9626	960		179	189	36	368	220	674	113	12	307	2837	0	159	627	140	32	252
9627	1068		195	241	43	307	293	989	224	68	1006	4415	10	104	1330	163	112	193
9628	740		205	167	33	386	399	722	121	41	210	2405	7	26	476	164	120	156
9629	932		172	216	21	409	253	161	249	49	308	3461	5	210	521	49	150	191
9630	1139		21	80	4	210	131	168	61	26	104	2428	4	301	177	18	70	173
9631	1010		100	204	19	299	182	174	212	46	146	2209	6	354	245	45	35	102
9632	934		45	93	5	59	104	290	107	21	224	2030	3	22	553	59	12	132
9633	1046		76	211	8	57	124	201	244	46	416	2859	4	238	901	40	83	91
9634	1137		71	224	7	42	126	272	81	17	980	3914	5	118	2251	2	24	148
9636	833		27	103	2	31	93	217	101	18	230	2421	3	217	631	28	34	183
9637	891		39	109	16	53	94	702	83	33	1128	3635	6	130	696	252	64	399
9638	888		85	117	3	39	79	181	107	24	210	1675	1	247	300	40	53	111
9639	1158		47	209	3	78	173	586	147	37	533	3635	2	172	555	149	106	112
9640	876		33	172	3	51	155	358	137	31	223	2071	3	223	696	76	69	74
9642	909		19	136	5	62	112	267	148	50	619	2421	3	371	562	51	64	83
9644	969		185	174	1	181	228	348	248	44	358	3239	6	121	525	15	34	80
9645	1029		240	276	2	107	300	389	116	37	303	2035	1	226	555	9	23	90
9646	683		52	177	10	85	233	256	242	29	404	3519	12	10	179	15	29	192
9647	864		233	412	34	460	358	361	246	52	456	4528	9	270	1385	103	39	51
9648	785		355	334	12	329	226	391	269	64	611	2863	4	87	1075	100	63	139
9649	983		128	373	39	135	268	1846	350	68	985	4105	9	148	2093	639	37	51
9650	907		83	72	9	94	162	253	44	18	472	2699	4	48	960	48	52	490
9651	983		11	122	4	76	104	124	80	10	261	2616	4	56	213	54	54	303
9652	977		98	167	2	53	104	227	207	28	330	3724	6	224	822	96	29	149
9653	895		209	235	12	274	221	457	183	30	361	2837	2	135	1596	247	55	97
9654	1149		62	290	1	273	212	276	142	40	307	2224	1	200	484	103	1	50
9655	729		339	245	35	368	290	1731	332	58	934	4589	6	128	2052	205	48	126
9656	754		274	264	23	429	304	1332	394	80	599	4518	5	155	1531	213	60	156
9658	1058		76	324	12	167	248	307	402	94	440	4257	13	275	1518	116	77	122
9659	846		176	287	11	71	176	162	202	79	239	2863	5	275	835	23	37	128
9660	946		288	206	14	78	205	472	246	72	755	5410	7	36	1514	36	12	166
9661	918		26	179	5	64	144	227	189	36	232	3313	0	346	586	48	55	126
9662	882		94	101	7	193	169	409	93	28	460	3201	2	73	834	38	28	94
9663	976		62	8	0	50	84	301	43	5	156	2011	4	31	12	76	7	1036
9665	909		137	163	1	71	73	226	84	11	86	1191	0	114	75	48	33	31
9666	689		384	321	14	331	249	653	249	87	302	3605	6	78	929	30	33	133
9668	812		161	171	1	219	141	270	100	28	129	1880	2	152	138	99	23	46
9669	881		86	65	12	152	116	489	77	15	298	2078	1	53	608	117	8	284
9673	1034		82	96	5	119	107	478	67	11	200	1654	1	46	758	108	16	48
9678	975		179	207	14	71	174	347	233	41	196	2201	5	122	1940	92	23	74
9679	796		193	186	3	243	178	298	105	30	256	1807	4	222	475	152	65	41
9680	820		263	230	4	270	225	432	150	30	329	2181	3	244	699	195	82	52
9681	816		195	209	1	248	197	326	119	16	240	1613	5	179	331	159	68	39
9682	847		56	99	4	174	100	637	78	17	227	1816	5	61	485	111	34	144
9683	795		192	179	5	245	164	283	94	21	202	1806	3	235	386	131	58	30
9684	739		296	276	31	353	471	1016	222	62	247	3095	6	30	619	329	67	84
9690	689		218	207	10	422	249	378	268	51	706	3761	9	96	596	31	31	44
9693	687		79	170	4	200	180	360	165	49	258	2333	2	110	396	100	27	61
9696	1153		142	156	4	192	197	427	161	29	314	4205	3	45	606	98	20	103
9697	770		170	227	21	69	153	668	62	34	347	2313	9	117	445	121	60	124
9698	770		195	230	21	322	243	411	256	208	861	3415	14	148	715	119	2	130
9699	754		82	273	20	97	333	467	190	74	423	2874	3	30	883	70	42	257
9701	844		236	142	15	219	163	333	101	22	399	2594	2	69	375	1	30	177
9702	896		186	219	8	64	143	631	292	34	344	2689	3	129	435	220	8	73
9703	899		136	234	13	70	124	305	132	59	228	2929	1	120	1082	61	46	43
9704	827		143	383	24	108	323	621	400	78	1145	4335	10	64	1535	91	57	71
9705	916		53	158	19	49	132	441	54	52	874	2508	3	124	2116	101	41	42
9706	800		174	208	24	127	344	458	97	37	510	5182	0	39	543	124	51	195
9707	1017		48	133	21	208	167	318	122	45	512	2350	8	106	720	82	61	159
9708	2297		53	37	1	65	55	516	61	10	276	5324	0	50	33	105	4	1056
9709	1041		48	216	0	313	319	207	134	48	408	3337	0	130	505	25	44	250
9710	956		231	191	11	327	237	251	314	36	502	4720	2	117	1281	29	45	275
9711	817		26	71	6	151	141	902	81	19	139	2040	0	31	72	48	12	77
9712	803		241	266	5	348	165	375	116	55	332	2649	4	262	1029	67	54	51
9713	917		265	310	13	341	223	740	156	46	659	4396	6	132	2926	52	57	258
9714	800		154	137	7	42	144	390	109	25	290	2763	2	42	886	61	61	402
9717	838		223	84	4	175	175	340	84	35	674	4006	1	42	424	84	19	329
9719	741		188	243	43	128	179	543	159	57	624	4323	13	304	1464	36	152	73
9720	774		208	222	5	265	245	307	242	57	376	2320	9	111	865	61	64	685
9721	928		320	216	5	260	255	811	145	70	474	3428	3	55	1394	77	40	228
9722	753		86	60	0	18	125	212	67	24	539	3647	8	18	133	15	3	619
9723	856		270	399	5	278	194	254	157	33	141	1981	5	228	625	22	11	27
9725	868		143	81	8	156	198	238	71	23	415	3172	1	112	79	59	31	224
9726	904		239	253	8	304	290	263	165	42	373	2722	3	195	743	156	66	72
9727	913		54	317	14	350	231	227	217	51	456	3092	4	223	929	34	115	41
9728	750		283	279	28	392	163	384	154	83	659	3628	12	332	1333	55	73	84
9729	1025		453	338	19	359	392	977	498	148	739	4217	1	143	1623	195	39	234
9730	873		71	52	2	73	55	1343	62	18	245	1819	3	23	133	415	3	306
9731	814		294	177	2	249	208	456	97	52	420	2707	5	84	413	134	95	219
9732	769		111	70	2	109	79	490	78	20	376	2608	1	56	372	100	11	154
9733	955		40	219	6	253	242	361	283	66	536	3725	5	104	954	52	128	76
9734	839		248	225	1	398	345	614	281	71	595	3575	11	51	371	80	52	87
9735	916		174	151	5	144	126	1278	137	50	207	2148	0	72	592	116	14	52
9736	946		203	248	4	371	212	466	279	34	366	2404	6	110	201	106	63	384
9737	735		354	382	35	421	198	674	258	70	789	3924	7	140	1640	266	98	167
9738	847		21	169	2	182	191	697	121	32	429	3375	10	92	1093	119	39	306
9739	847		43	255	3	338	305	1040	254	63	408	3135	11	135	642	188	82	111
9741	638		159	136	10	189	157	582	172	31	363	2621	10	50	416	115	45	214
9742	912		267	313	10	95	254	293	183	36	236	2694	6	279	828	120	95	71
9743	725		118	61	2	150	164	192	38	6	539	3459	0	18	93	57	16	362
9744	1023		328	325	3	261	166	159	117	16	96	2052	3	346	295	17	45	71
9745	931		156	203	26	291	225	368	180	54	349	2389	14	130	915	87	101	98
9746	812		30	130	32	109	217	588	90	39	377	2567	5	75	1403	114	27	72
9747	1031		138	363	21	190	335	1142	293	86	664	4441	13	83	1300	144	97	208
9748	794		243	336	17	362	222	1855	160	78	539	2670	11	216	1370	314	147	169
9749	805		65	362	23	134	267	571	203	98	489	3641	4	326	1419	32	1	37
9754	992		243	230	19	342	312	514	280	63	568	2847	4	39	892	105	106	52
9755	874		154	203	17	484	220	2690	69	40	749	3982	12	84	1337	277	43	314
9756	1101		172	157	2	178	191	480	217	13	300	2502	5	106	340	54	24	222
9757	967		31	79	9	90	82	337	33	13	151	1841	0	63	90	115	17	245
9759	857		164	189	7	51	189	418	189	46	372	3420	1	157	91	49	34	142
9762	861		84	61	6	104	96	1220	73	18	940	4457	1	57	268	40	14	654
9768	801		58	211	16	318	409	1461	62	48	839	3012	11	42	1097	89	135	398
9769	820		64	139	0	168	181	666	35	22	201	2910	30	52	291	2	17	253
9770	781		151	306	19	435	403	730	184	85	400	3193	19	179	395	49	131	151
9771	765		307	211	3	408	379	299	214	40	694	3569	1	49	834	40	116	247
9772	902		101	171	0	247	471	968	220	64	464	3239	0	52	515	58	51	227
9774	766		232	239	12	408	314	566	164	45	457	4046	20	207	523	153	39	278
9775	784		161	253	14	165	185	755	82	50	681	4300	23	42	1812	149	100	135
9776	804		161	223	8	254	259	1569	100	26	707	3942	13	47	1068	80	50	94
9777	947		205	244	20	124	316	547	178	44	387	3320	2	128	1053	36	182	91
9778	837		338	90	0	165	230	372	98	12	376	1938	2	95	561	4	28	57
9779	827		270	317	24	442	418	456	238	46	756	7857	28	257	1578	101	141	104
9780	801		33	203	7	276	246	1151	234	48	675	4088	27	51	1437	206	15	135
9781	696		347	229	6	485	224	1979	182	35	981	4197	28	100	1349	120	76	171
9782	741		235	151	13	264	167	2636	81	41	561	4108	4	27	1023	140	101	364
9783	840		457	306	166	550	303	1759	315	80	1405	4802	15	67	3255	197	65	96
9784	874		237	148	5	191	214	365	265	36	346	1961	10	67	392	77	85	117
9785	699		43	102	4	203	199	524	22	15	332	2319	4	56	419	97	8	231
9786	1007		177	255	24	387	270	1362	177	82	479	4073	15	60	725	235	107	74
9788	785		86	152	10	290	267	1224	229	64	360	2971	6	75	366	140	171	130
9789	871		188	324	4	637	489	282	421	54	1073	6541	8	164	1942	20	98	252
9790	957		196	195	13	84	215	51	75	22	178	2883	4	112	123	21	64	150
9791	1105		71	186	3	495	345	970	336	86	1174	5816	9	101	904	46	0	155
9792	807		265	220	11	335	181	3186	114	50	481	3773	18	53	1352	223	0	379
9793	850		212	238	40	119	397	394	144	57	284	2834	2	90	577	236	165	229
9794	884		395	330	30	437	275	1353	218	46	1222	4671	14	48	1563	36	49	171
9795	988		58	222	22	453	276	1164	227	50	1051	4121	18	95	1551	326	101	35
9796	519		550	295	23	318	303	876	249	62	838	4906	25	60	1590	195	166	150
9797	923		166	173	0	345	324	238	237	66	212	2541	5	67	113	145	26	155
9798	1122		129	93	13	344	266	158	170	39	248	2611	0	48	97	3	25	258
9799	1069		91	172	24	257	187	323	143	33	433	2480	3	72	493	94	89	44
9800	1036		415	225	21	236	428	199	120	47	254	3086	0	100	450	15	225	29
9801	896		52	91	3	324	203	132	66	19	179	1706	0	45	117	8	60	105
9802	861		284	275	13	511	203	583	163	67	569	4487	7	127	705	28	213	197
9803	808		176	146	19	307	150	1269	159	30	840	4388	15	92	855	181	16	352
9804	1030		114	306	55	592	389	2149	339	74	811	6236	37	108	1851	348	66	115
9805	1216		36	183	15	315	185	189	276	45	496	2618	4	67	507	50	92	59
9806	1049		51	318	10	458	271	117	185	69	504	3258	1	89	466	53	41	49
9807	797		128	250	35	568	442	1562	157	52	1221	5642	3	86	981	92	222	257
9808	657		101	222	22	300	276	1908	135	75	771	4116	16	41	2596	204	214	122
9809	955		130	264	24	448	370	1257	271	43	846	4426	9	101	1540	251	16	113
9811	715		167	257	13	274	183	547	129	23	372	3480	42	75	1765	44	0	83
9812	997		164	208	10	220	175	877	227	70	519	3120	6	60	1098	259	93	94
9813	631		285	223	1	292	154	364	164	61	406	5956	14	110	711	39	160	188
9814	861		148	148	7	186	127	1490	131	23	792	3329	7	31	819	78	137	310
9815	1008		180	206	12	267	206	1149	163	49	866	5204	39	92	1217	230	12	239
9816	906		297	238	17	503	257	1031	229	96	826	4831	14	104	1695	256	146	321
9817	838		203	145	13	66	154	376	224	24	580	3633	2	35	295	67	16	93
9819	661		92	89	5	10	41	133	23	28	220	2864	8	26	425	113	18	427
9821	701		120	146	9	86	181	184	203	11	330	2375	4	105	879	20	14	612
9823	598		32	71	0	32	49	20	35	13	187	2121	0	57	88	16	6	127
9824	807		25	195	1	155	169	837	100	13	460	2069	1	297	442	200	56	288
9825	678		119	113	12	47	144	399	84	29	460	2864	0	75	712	84	33	120
9826	699		268	187	28	93	260	306	242	41	609	3506	2	84	295	110	40	219
9827	821		72	91	1	10	75	254	51	5	327	2090	1	74	538	15	23	27
9828	589		27	65	4	18	40	188	28	10	328	2521	2	15	239	32	7	166
9829	633		80	36	5	13	80	92	28	6	271	2466	8	11	203	94	12	88
9830	643		330	342	33	472	395	369	261	41	849	2649	27	86	1087	56	121	562
9831	616		206	127	24	205	186	39	165	16	403	2741	0	105	204	3	22	212
9832	697		190	114	3	316	198	352	93	26	179	2415	4	18	238	234	57	114
9833	738		77	155	15	74	282	441	163	38	350	2772	2	31	371	45	16	287
9834	721		277	283	27	631	220	307	326	217	1710	5606	33	143	1653	24	19	618
9835	826		123	158	6	208	153	493	126	45	437	2834	9	47	409	93	16	166
9838	848		22	71	3	17	73	98	43	4	109	1821	3	9	89	58	43	66
9839	730		145	109	3	95	84	217	149	28	289	4652	1	54	230	67	29	304
9840	820		37	103	9	162	66	480	133	21	263	1916	0	83	501	36	24	436
9841	950		446	338	34	390	322	2548	182	268	1497	5826	7	106	3037	354	63	61
9843	888		338	245	65	84	296	755	298	89	906	4079	3	120	1537	55	62	88
9844	805		339	219	8	368	297	103	136	65	420	3284	0	145	533	8	59	409
9845	1058		391	253	0	212	461	2382	520	112	817	3504	0	294	1895	218	49	41
9846	844		390	260	4	530	328	141	339	58	652	4651	4	173	629	7	80	201
9848	944		215	152	1	309	248	189	250	59	250	2768	0	139	288	24	22	336
9849	743		212	196	60	102	360	3939	262	86	1255	4944	7	82	995	1259	51	48
9850	823		112	97	5	41	57	208	119	5	380	2565	0	139	668	11	43	95
9851	904		41	117	5	44	86	1572	147	29	720	4333	4	53	697	158	19	294
9852	902		289	188	51	105	295	4474	295	138	1189	5770	7	72	2082	475	80	221
9853	1087		262	222	5	258	156	1390	200	52	753	3614	4	137	682	298	1	158
9854	689		164	80	9	206	200	199	272	53	699	3136	8	119	472	8	49	91
9855	791		139	140	15	24	148	766	325	52	463	4212	28	67	715	81	68	303
9856	968		520	341	39	511	435	3387	88	127	1009	5218	24	114	2828	870	57	73
9858	800		230	227	36	81	192	2207	307	18	634	5223	8	62	1849	360	58	147
9859	693		197	108	34	66	148	646	198	34	1160	4613	1	56	1478	188	62	431
9860	637		73	105	1	155	97	83	16	16	232	3543	2	64	501	9	21	845
9861	751		166	151	1	301	232	63	173	105	178	3329	10	146	153	5	40	1147
9862	756		69	138	7	244	339	168	161	29	383	2671	0	38	420	46	30	109
9864	646		164	90	16	73	407	149	90	8	329	2815	2	47	222	49	37	220
9866	793		139	81	6	75	79	594	100	94	503	2276	0	52	570	21	60	174
9867	781		445	303	30	492	193	134	273	56	551	2407	11	98	660	65	56	566
9868	691		29	89	0	128	189	203	51	6	130	1601	1	25	187	10	21	515
9870	1100		72	168	4	130	119	43	274	58	502	3296	4	141	287	3	43	72
9871	730		50	95	9	223	208	1123	79	17	317	2408	7	30	531	146	57	173
9872	721		148	106	15	215	178	632	84	23	569	3263	0	45	337	33	22	162
9873	1135		179	168	13	99	238	202	344	61	896	3593	20	223	707	20	68	111
9874	1165		77	72	0	136	81	748	76	21	311	1513	3	57	159	89	8	134
9875	1193		229	162	5	307	208	89	347	59	661	2747	3	190	537	14	55	51
9876	873		22	103	0	221	202	857	93	24	456	3438	2	101	783	100	100	104
9877	900		383	242	13	60	150	527	108	36	335	3055	4	53	415	47	30	100
9878	884		300	163	12	121	260	42	226	60	477	3918	0	224	159	2	32	84
9879	1156		302	176	2	490	169	172	314	54	379	3630	5	280	75	6	5	98
9880	727		23	147	1	101	112	229	82	11	132	1195	6	45	238	54	22	452
9881	718		154	115	6	29	167	166	108	11	276	2809	0	154	125	48	30	102
9882	919		153	192	4	437	162	141	179	74	544	4100	0	175	598	3	104	241
9883	878		236	177	6	120	291	97	164	23	281	2651	2	171	176	13	40	129
9885	1154		305	189	7	166	218	380	264	62	709	2968	4	198	410	14	19	229
9886	1339		259	300	31	698	315	1326	384	88	787	5245	4	324	1462	48	65	82
9888	997		162	450	37	206	294	5754	446	301	1528	5923	161	125	1558	272	61	245
9890	945		357	218	10	66	120	1336	87	33	409	3530	4	211	647	146	26	246
9891	1080		403	417	89	260	886	3533	335	133	1347	6228	21	195	2417	556	53	70
9892	1198		88	361	17	106	239	752	262	72	484	4715	3	224	1069	152	91	104
9893	1371		601	376	114	701	391	3075	507	94	1585	6541	34	203	2355	778	61	113
9894	1205		414	270	25	384	280	1907	231	77	486	4672	11	71	1474	430	35	158
9895	1100		130	356	20	397	187	902	152	69	883	4559	34	94	1509	64	36	100
9897	1132		108	333	24	112	375	1711	353	127	950	4087	12	67	1528	208	95	209
9898	1293		329	339	25	164	337	1239	569	353	659	5644	15	157	1255	838	41	37
9899	811		119	168	2	217	145	128	195	115	466	2469	6	110	279	13	21	133
9900	951		331	273	25	320	303	762	311	68	679	3556	10	167	761	47	171	41
9901	887		48	95	6	32	123	159	57	60	222	2601	1	26	82	26	10	732
9902	886		167	235	20	80	214	1486	147	52	933	4824	26	170	2020	137	38	101
9903	976		111	130	8	42	102	295	123	41	290	3247	7	117	442	6	33	295
9904	848		372	301	20	318	225	1123	207	59	813	4634	31	376	1407	132	33	163
9905	1120		397	541	31	294	573	282	648	62	607	4275	8	178	858	41	49	97
9906	863		83	174	4	178	250	576	182	10	328	2140	5	45	307	69	32	87
9907	955		374	149	15	235	225	417	193	47	430	2675	4	47	328	196	72	284
9908	782		264	218	39	170	262	294	266	133	447	2482	8	84	515	43	95	78
9909	793		257	107	11	189	278	677	138	17	215	1826	3	31	113	74	9	188
9911	1000		39	94	18	303	122	1446	63	15	452	2620	1	108	95	456	36	109
9913	1111		44	62	4	48	75	205	116	34	380	2282	3	65	294	34	22	43
9915	924		171	222	11	74	189	1670	145	47	843	4853	24	57	1855	559	18	559
9918	774		133	104	6	60	156	1072	85	44	267	2273	7	73	634	76	39	98
9920	712		186	130	1	60	233	164	178	32	69	1616	6	82	75	21	9	29
9921	895		178	244	4	156	269	643	260	64	320	2972	3	73	1049	62	37	182
9924	921		109	176	3	137	180	680	127	28	351	3085	17	67	709	65	45	210
9927	634		130	203	4	358	457	871	222	64	297	3263	6	58	642	51	39	96
9928	829		435	212	24	211	306	779	243	127	533	4098	1	113	950	64	55	57
9929	738		147	54	1	111	119	492	49	10	98	1440	5	43	98	70	15	106
9930	748		298	152	6	96	233	978	115	30	211	2113	3	32	763	119	45	215
9931	822		63	118	5	57	101	275	45	38	302	1597	2	44	324	25	29	127
9933	866		106	100	1	162	158	545	60	8	203	1866	6	34	51	88	40	170
9934	730		309	275	1	168	319	1125	226	111	660	3601	19	96	1202	86	89	64
9936	756		346	175	23	254	329	697	148	42	344	2805	11	20	517	99	44	254
9937	1183		104	226	4	78	191	188	252	20	606	7321	6	36	317	24	9	180
9938	1024		294	296	2	414	338	123	303	59	931	8369	9	51	1345	30	48	124
9939	1107		80	222	16	73	290	657	244	44	711	3640	3	86	1087	50	28	135
9940	839		147	83	5	39	125	245	140	7	338	2013	0	17	107	22	33	177
9941	758		147	184	1	255	354	568	169	21	225	2838	4	19	385	36	29	104
9942	1066		171	330	12	533	420	533	350	314	591	4331	6	178	1528	9	60	101
9943	795		276	232	6	73	288	574	200	44	338	3241	6	61	472	65	51	235
9944	997		779	385	8	575	275	727	390	105	1069	7304	7	208	1865	12	213	106
9945	601		46	58	3	22	81	524	24	6	193	3176	2	30	272	207	13	289
9946	723		227	141	18	129	278	792	207	33	687	4050	5	49	1068	74	50	144
9947	966		0	3	0	77	64	517	104	10	139	1721	12	57	143	152	98	48
9948	835		76	72	3	36	98	2126	126	27	329	1836	16	55	137	310	22	118
9949	1055		24	136	66	86	295	705	83	21	598	3453	2	139	464	103	56	92
9950	751		469	244	9	325	335	413	216	48	363	3522	3	27	603	39	52	62
9951	971		86	101	10	126	125	533	63	12	356	2748	7	31	865	77	49	815
9952	770		73	68	2	137	208	1282	39	11	189	2205	8	18	117	117	14	786
9953	970		79	122	4	128	88	800	75	21	363	2847	28	51	542	273	37	140
9954	993		168	166	15	70	197	223	141	58	525	6887	6	83	684	58	34	260
9957	956		194	184	8	249	208	516	112	35	637	3065	8	42	1360	75	36	352
9958	868		234	349	18	392	293	1119	228	70	1160	3866	20	101	1951	147	51	140
9959	1421		57	77	4	148	143	149	48	21	195	1748	0	50	341	74	24	92
9960	941		186	135	5	211	208	336	101	31	157	2407	5	39	105	28	47	149
9961	893		599	301	14	522	408	1491	359	138	573	4288	17	37	1041	241	154	94
9962	801		31	1	0	13	28	157	10	5	413	2304	0	38	95	15	9	728
9963	867		53	105	4	46	207	542	127	17	216	2331	6	91	122	82	13	606
9964	867		115	164	16	209	257	711	89	38	364	2839	5	32	336	69	40	207
9965	836		159	282	14	343	379	933	177	47	486	3413	7	88	1644	140	23	240
9966	802		98	248	2	268	288	1843	173	31	544	3768	6	49	976	58	25	135
9967	733		209	103	12	185	197	456	149	45	141	2067	2	32	255	34	15	70
9968	1323		135	131	0	147	300	233	280	33	402	4107	3	87	231	96	11	240
9969	870		555	342	21	470	249	1885	256	61	1055	5327	9	121	1347	97	94	207
9970	820		89	73	2	143	167	338	118	20	225	2188	4	49	249	60	48	153
9972	946		126	216	13	192	235	213	271	50	550	5097	7	86	782	59	39	106
9973	748		20	24	0	13	10	424	8	2	66	1408	9	8	203	142	3	69
9976	826		108	252	9	249	205	739	199	79	521	4814	22	87	1919	178	22	369
9979	1077		103	189	3	218	145	291	118	34	321	2710	1	118	547	37	65	54
9980	957		80	335	54	207	281	165	406	70	571	2374	17	48	653	29	116	220
9981	919		273	191	3	211	176	533	269	39	312	4026	4	91	332	65	40	154
9982	743		275	219	8	337	252	999	250	56	332	2804	7	79	859	67	90	128
9983	824		288	290	37	94	292	270	291	97	625	6903	6	144	1439	76	101	316
9984	926		136	243	14	107	138	1113	208	57	442	2440	5	128	587	106	105	41
9985	965		31	24	0	34	128	717	20	0	109	1907	7	46	91	80	0	308
9987	1226		165	127	41	305	198	256	174	43	550	2205	15	47	417	94	27	45
9988	834		253	227	78	96	245	1870	181	73	2913	6963	20	103	1836	155	126	1025
9989	744		183	173	20	288	263	323	292	80	486	2418	13	66	291	76	128	389
9990	634		89	73	12	12	104	177	81	24	89	2258	10	36	141	25	14	68
9991	710		36	18	3	15	41	357	30	3	473	3323	0	45	100	40	8	391
9992	770		374	370	110	124	433	2813	278	119	1366	4727	5	81	958	197	107	95
9993	914		257	109	49	206	228	955	147	40	451	2190	7	61	651	145	74	81
9995	926		53	83	1	166	157	106	135	25	188	2293	3	81	232	14	16	185
9996	1090		73	52	4	223	177	400	29	17	246	1248	3	47	159	78	36	223
9997	702		55	279	11	370	368	292	376	59	1184	5916	18	81	1568	3	0	441
9998	931		147	138	0	199	179	750	74	33	310	2319	0	25	849	118	0	83
9999	617		122	141	16	86	84	577	65	19	286	2931	15	45	670	41	87	276
10000	704		318	319	4	169	228	754	222	39	577	3362	3	62	470	57	9	175
10001	697		57	222	20	327	392	1402	220	17	1105	3382	10	32	895	85	0	185
10002	988		134	160	16	62	174	426	144	15	780	6124	6	49	639	101	34	362
10006	806		57	162	1	268	213	412	64	28	272	3814	5	99	551	21	36	85
10008	804		56	14	0	74	115	352	19	8	131	2321	0	44	85	137	5	544
10009	1094		201	234	29	351	322	270	181	104	602	7684	10	85	852	53	84	354
10010	950		104	282	14	59	198	423	113	44	510	4016	23	86	1864	115	97	448
10011	763		340	323	68	322	405	1303	263	78	626	3569	5	131	741	90	75	154
10012	812		217	216	53	144	181	1328	147	153	1142	5097	19	61	1106	94	31	585
10013	799		666	540	137	491	414	2273	403	223	3191	8011	24	70	2174	158	125	171
10014	818		201	292	48	229	220	2086	193	181	780	3550	6	149	443	364	41	123
10015	1061		274	298	62	417	445	1016	191	65	1013	5784	20	177	1173	596	111	138
10016	813		382	177	2	387	230	549	217	32	312	4067	8	103	277	16	11	119
10017	796		213	100	6	167	180	305	62	34	256	3240	6	42	384	103	61	469
10018	673		269	296	10	265	230	458	353	48	654	5065	25	82	1119	65	193	141
10019	1370		82	175	17	231	195	432	109	16	432	2304	2	39	235	170	33	35
10020	991		76	198	4	310	331	99	307	63	716	3307	1	112	248	3	18	66
10021	876		185	128	0	330	203	657	88	17	435	3930	7	32	450	26	0	432
10022	1296		250	127	1	247	161	373	208	38	343	3491	5	36	245	25	0	102
10023	910		296	233	12	103	276	637	289	57	373	2646	5	104	370	122	48	239
10024	912		771	539	42	709	493	358	98	76	777	3648	1	125	204	28	47	91
10026	912		169	349	39	72	215	103	113	49	507	2238	0	153	522	6	7	193
																AT4G37390
																7
																61
																139
																19
																93
																66
																18
																110
																39
																64
																133
																164
																44
																231
																67
																698
																27
																212
																53
																281
																40
																54
																29
																71
																0
																446
																97
																79
																94
																155
																61
																111
																66
																80
																98
																272
																148
																102
																149
																106
																74
																175
																113
																25
																117
																56
																253
																93
																71
																45
																44
																223
																72
																109
																51
																68
																101
																112
																37
																61
																102
																66
																51
																110
																96
																233
																47
																34
																65
																47
																52
																91
																256
																157
																69
																122
																148
																106
																129
																270
																41
																14
																15
																64
																91
																94
																128
																73
																83
																42
																65
																130
																40
																118
																45
																20
																133
																375
																30
																28
																47
																39
																63
																9
																58
																16
																2
																4
																20
																33
																5
																11
																145
																45
																100
																39
																8
																26
																21
																1
																53
																23
																21
																9
																601
																82
																13
																460
																23
																21
																37
																1
																4
																101
																22
																49
																59
																68
																63
																45
																6
																82
																31
																58
																91
																100
																7256
																77
																32
																106
																348
																47
																117
																112
																1681
																62
																323
																123
																14
																120
																93
																13
																90
																176
																33
																143
																57
																31
																147
																81
																133
																66
																89
																184
																1243
																13
																74
																142
																21
																7
																36
																409
																14
																3
																348
																77
																76
																71
																41
																6
																36
																489
																93
																84
																50
																21
																82
																110
																112
																48
																286
																34
																34
																11
																24
																42
																62
																77
																17
																74
																182
																12
																66
																105
																1618
																112
																107
																75
																198
																107
																12
																350
																70
																191
																91
																236
																69
																155
																78
																45
																131
																190
																146
																124
																162
																50
																58
																113
																51
																181
																134
																47
																60
																52
																115
																53
																38
																108
																18
																135
																77
																33
																195
																14
																220
																74
																144
																111
																390
																9
																250
																221
																125
																61
																230
																80
																186
																112
																135
																93
																112
																62
																81
																112
																40
																152
																64
																107
																122
																47
																57
																249
																184
																158
																181
																245
																479
																577
																114
																64
																262
																17
																10
																3
																102
																68
																99
																192
																10
																20
																39
																34
																73
																28
																101
																77
																18
																40
																222
																21
																35
																759
																10
																246
																2
																27
																58
																306
																119
																123
																30
																42
																95
																26
																202
																65
																1
																84
																101
																52
																27
																45
																180
																6
																182
																112
																140
																51
																57
																102
																3
																2
																4
																171
																31
																42
																115
																223
																46
																28
																156
																15
																38
																32
																69
																365
																9
																61
																9
																9
																43
																336
																16
																79
																47
																58
																3
																29
																43
																21
																22
																11
																22
																39
																39
																58
																15
																42
																4
																3
																123
																107
																73
																16
																25
																115
																63
																27
																5
																109
																239
																166
																256
																65
																109
																50
																225
																255
																46
																150
																52
																153
																90
																101
																57
																59
																60
																126
																56
																35
																140
																163
																164
																49
																18
																45
																59
																40
																2
																28
																252
																40
																149
																76
																51
																15
																9
																15
																103
																100
																639
																48
																54
																96
																247
																103
																205
																213
																116
																23
																36
																48
																38
																76
																48
																30
																99
																117
																108
																92
																152
																195
																159
																111
																131
																329
																31
																100
																98
																121
																119
																70
																1
																220
																61
																91
																101
																124
																82
																105
																25
																29
																48
																67
																52
																61
																84
																36
																61
																77
																15
																22
																59
																156
																34
																55
																195
																415
																134
																100
																52
																80
																116
																106
																266
																119
																188
																115
																120
																57
																17
																87
																114
																144
																314
																32
																105
																277
																54
																115
																49
																40
																89
																2
																49
																40
																58
																153
																149
																80
																36
																4
																101
																206
																120
																140
																197
																77
																97
																235
																140
																20
																21
																46
																223
																236
																36
																326
																195
																145
																3
																94
																15
																8
																28
																181
																348
																50
																53
																92
																204
																251
																44
																259
																39
																78
																230
																256
																67
																113
																20
																16
																200
																84
																110
																15
																32
																94
																56
																3
																234
																45
																24
																93
																58
																67
																36
																354
																55
																8
																218
																7
																24
																1259
																11
																158
																475
																298
																8
																81
																870
																360
																188
																9
																5
																46
																49
																21
																65
																10
																3
																146
																33
																20
																89
																14
																100
																47
																2
																6
																54
																48
																3
																13
																14
																48
																272
																146
																556
																152
																778
																430
																64
																208
																838
																13
																47
																26
																137
																6
																132
																41
																69
																196
																43
																74
																456
																34
																559
																76
																21
																62
																65
																51
																64
																70
																119
																25
																88
																86
																99
																24
																30
																50
																22
																36
																9
																65
																12
																207
																74
																152
																310
																103
																39
																77
																117
																273
																58
																75
																147
																74
																28
																241
																15
																82
																69
																140
																58
																34
																96
																97
																60
																59
																142
																178
																37
																29
																65
																67
																76
																106
																80
																94
																155
																76
																25
																40
																197
																145
																14
																78
																3
																118
																41
																57
																85
																101
																21
																137
																53
																115
																90
																94
																158
																364
																596
																16
																103
																65
																170
																3
																26
																25
																122
																28
																6
																AT4G37390
																7
																61
																139
																19
																93
																66
																18
																110
																39
																64
																133
																164
																44
																231
																67
																698
																27
																212
																53
																281
																40
																54
																29
																71
																0
																446
																97
																79
																94
																155
																61
																111
																66
																80
																98
																272
																148
																102
																149
																106
																74
																175
																113
																25
																117
																56
																253
																93
																71
																45
																44
																223
																72
																109
																51
																68
																101
																112
																37
																61
																102
																66
																51
																110
																96
																233
																47
																34
																65
																47
																52
																91
																256
																157
																69
																122
																148
																106
																129
																270
																41
																14
																15
																64
																91
																94
																128
																73
																83
																42
																65
																130
																40
																118
																45
																20
																133
																375
																30
																28
																47
																39
																63
																9
																58
																16
																2
																4
																20
																33
																5
																11
																145
																45
																100
																39
																8
																26
																21
																1
																53
																23
																21
																9
																601
																82
																13
																460
																23
																21
																37
																1
																4
																101
																22
																49
																59
																68
																63
																45
																6
																82
																31
																58
																91
																100
																7256
																77
																32
																106
																348
																47
																117
																112
																1681
																62
																323
																123
																14
																120
																93
																13
																90
																176
																33
																143
																57
																31
																147
																81
																133
																66
																89
																184
																1243
																13
																74
																142
																21
																7
																36
																409
																14
																3
																348
																77
																76
																71
																41
																6
																36
																489
																93
																84
																50
																21
																82
																110
																112
																48
																286
																34
																34
																11
																24
																42
																62
																77
																17
																74
																182
																12
																66
																105
																1618
																112
																107
																75
																198
																107
																12
																350
																70
																191
																91
																236
																69
																155
																78
																45
																131
																190
																146
																124
																162
																50
																58
																113
																51
																181
																134
																47
																60
																52
																115
																53
																38
																108
																18
																135
																77
																33
																195
																14
																220
																74
																144
																111
																390
																9
																250
																221
																125
																61
																230
																80
																186
																112
																135
																93
																112
																62
																81
																112
																40
																152
																64
																107
																122
																47
																57
																249
																184
																158
																181
																245
																479
																577
																114
																64
																262
																17
																10
																3
																102
																68
																99
																192
																10
																20
																39
																34
																73
																28
																101
																77
																18
																40
																222
																21
																35
																759
																10
																246
																2
																27
																58
																306
																119
																123
																30
																42
																95
																26
																202
																65
																1
																84
																101
																52
																27
																45
																180
																6
																182
																112
																140
																51
																57
																102
																3
																2
																4
																171
																31
																42
																115
																223
																46
																28
																156
																15
																38
																32
																69
																365
																9
																61
																9
																9
																43
																336
																16
																79
																47
																58
																3
																29
																43
																21
																22
																11
																22
																39
																39
																58
																15
																42
																4
																3
																123
																107
																73
																16
																25
																115
																63
																27
																5
																109
																239
																166
																256
																65
																109
																50
																225
																255
																46
																150
																52
																153
																90
																101
																57
																59
																60
																126
																56
																35
																140
																163
																164
																49
																18
																45
																59
																40
																2
																28
																252
																40
																149
																76
																51
																15
																9
																15
																103
																100
																639
																48
																54
																96
																247
																103
																205
																213
																116
																23
																36
																48
																38
																76
																48
																30
																99
																117
																108
																92
																152
																195
																159
																111
																131
																329
																31
																100
																98
																121
																119
																70
																1
																220
																61
																91
																101
																124
																82
																105
																25
																29
																48
																67
																52
																61
																84
																36
																61
																77
																15
																22
																59
																156
																34
																55
																195
																415
																134
																100
																52
																80
																116
																106
																266
																119
																188
																115
																120
																57
																17
																87
																114
																144
																314
																32
																105
																277
																54
																115
																49
																40
																89
																2
																49
																40
																58
																153
																149
																80
																36
																4
																101
																206
																120
																140
																197
																77
																97
																235
																140
																20
																21
																46
																223
																236
																36
																326
																195
																145
																3
																94
																15
[truncated: 44,592 more rows]

## Sheet: AT5G65310
accession ID	AT5G65310		AT1G29460	AT1G29500	AT1G04610	AT1G31580	AT2G14960	AT2G18010	AT2G23170	AT3G03820	AT3G03840	AT3G23030	AT3G23635	AT3G28857	AT3G58190	AT4G10150	AT4G14819	AT4G32280	AT5G18060	AT5G47370	AT5G54490	AT5G62280	AT5G62280
108	1149		65	39	0	43	11	0	91	70	36	3643	3	7	0	115	2	105	47	759	194		88
139	2397		686	259	15	9	12	65	996	673	302	6616	21	34	1	152	5	2929	689	4062	113		1317
159	5846		250	67	47	2649	2	15	668	108	106	2438	0	32	2	86	0	621	271	1487	61		1123
265	4300		193	80	6	9	18	44	905	115	119	4386	10	105	1	183	59	1215	284	2691	133		1487
350	2783		427	553	13	1978	8	74	819	521	269	5879	15	38	2	93	22	835	538	3419	64		915
351	3083		292	440	18	9	10	38	782	148	109	3887	12	17	1	56	25	812	283	3205	81		1262
403	2112		249	209	10	30	10	66	347	361	185	3763	4	58	2	130	44	539	310	1722	214		443
410	3142		139	122	21	93	26	63	829	113	43	6801	4	13	4	67	6	1214	211	2445	467		1238
424	3361		60	121	15	258	15	23	847	82	22	5920	6	12	1	33	6	721	152	1914	610		821
428	4785		99	147	14	7170	8	32	1435	94	41	7785	10	54	2	42	12	1910	239	3174	629		1066
506	2840		320	450	9	15	13	25	1591	331	182	4851	8	23	2	48	0	692	188	3092	107		942
630	3991		470	502	15	3	47	72	2951	548	199	6183	23	21	5	65	5	2207	335	5907	154		2437
687	2808		482	563	12	14	9	35	763	480	312	4461	7	38	2	72	3	1078	253	2310	64		829
728	4540		716	847	20	26	53	78	3304	490	295	6305	16	59	15	100	5	2980	472	6217	123		2955
763	534		118	241	8	131	8	3	235	80	31	1945	4	13	4	165	8	49	6	1336	78		133
768	2971		136	173	16	1478	5	17	602	184	64	3606	3	61	2	81	13	822	287	1445	272		610
801	2531		207	1	23	47	13	23	84	198	192	5119	2	19	2	99	13	244	170	796	165		366
870	4007		358	416	19	159	41	63	2912	224	165	4423	22	38	6	93	5	1933	347	2847	134		1304
915	4153		315	373	7	14766	4	36	1073	282	168	3546	7	24	1	73	13	933	328	2451	53		965
932	6119		66	28	6	73	35	42	7499	46	40	4529	12	41	6	53	27	1150	126	2602	473		1251
997	2663		149	50	2	281	19	6	207	156	98	3376	8	35	1	66	12	1535	415	916	294		338
1002	1759		274	85	2	8457	7	15	204	358	178	3588	2	23	1	83	22	441	400	543	179		140
1066	1646		194	126	10	9806	44	26	201	449	182	3490	3	17	1	150	17	513	464	1477	195		242
1158	1446		125	72	2	13920	14	14	400	321	133	3378	8	5	1	23	7	926	203	1391	182		268
1317	2128		315	202	5	7983	28	21	48	433	199	4047	1	24	0	140	24	771	348	569	81		167
1435	4596		60	82	8	13	13	8	312	115	32	3451	2	1	4	52	3	156	35	973	98		748
1684	3755		373	709	15	23	24	17	1048	304	287	4599	10	31	16	50	8	1117	285	3267	175		1708
1741	2011		272	376	6	10	7	9	986	347	197	3148	5	18	1	31	4	294	109	2011	68		395
1829	3356		278	370	17	414	17	24	666	255	149	4266	9	14	2	46	10	570	304	2760	113		994
1872	3624		157	383	29	103	44	17	790	187	141	2957	6	2	14	49	0	316	274	3328	78		1533
1890	2196		121	161	11	27328	9	5	386	118	35	2497	0	10	5	38	3	31	28	874	71		241
1925	3194		179	312	12	145	14	11	611	66	91	3245	5	7	7	38	2	123	147	2091	130		958
1954	5019		150	251	21	1454	27	9	828	47	68	2123	1	6	10	26	10	263	139	2162	266		1110
2016	3869		80	278	29	175	26	2	278	21	54	2727	1	2	11	23	5	92	45	1336	217		839
2017	3441		266	494	37	32	36	17	1013	233	183	3060	3	29	5	31	13	1244	141	3024	174		1149
2031	7849		113	342	42	8	86	3	1839	104	58	2444	2	6	6	3	1	455	81	3093	128		3196
2171	3119		262	327	17	46	20	20	979	130	148	3933	5	6	4	32	5	343	223	2813	214		800
2202	2481		211	351	9	6942	11	8	447	88	108	3945	6	7	1	77	8	259	123	1831	124		770
2212	3030		342	413	13	52	21	37	1545	275	201	5306	13	43	3	46	10	1262	233	3519	52		1291
2276	3058		338	403	11	50	11	37	926	324	203	4975	9	16	4	39	7	492	292	4056	102		771
2278	4679		123	353	46	87	51	6	978	81	62	2323	1	8	8	55	3	129	36	2230	246		753
2317	3606		368	358	50	256	31	21	1060	215	154	4425	18	51	6	75	11	1943	455	2780	161		1455
2370	2316		380	589	26	19	18	67	1565	352	195	5175	12	49	2	53	16	1495	404	2832	69		1266
4779	2411		244	392	11	1420	4	27	341	233	90	3686	7	42	2	63	68	1235	364	1496	82		306
4807	3119		496	207	32	5	13	81	999	525	342	4925	24	52	2	96	10	2248	481	3549	99		1259
4826	2379		257	153	14	4424	10	33	838	504	291	4656	14	47	2	124	92	1235	384	2780	63		498
4884	4517		191	213	21	3206	54	26	4070	147	97	6512	17	77	7	46	23	1725	120	3671	677		1767
4931	2403		101	247	13	203	8	8	773	135	40	3673	1	11	0	8	3	42	61	1752	60		389
4939	3965		279	444	16	186	15	10	583	192	109	2388	3	20	3	39	27	437	129	2498	141		507
4958	2714		211	296	10	4574	9	32	613	230	100	3892	4	31	3	45	20	591	177	1994	103		686
5023	3373		300	399	9	1336	5	12	581	50	101	2518	2	13	3	100	10	325	140	2225	178		420
5104	2118		312	343	14	4674	18	25	1406	369	220	4621	5	17	4	24	4	378	132	3324	104		752
5151	2621		327	326	8	65	14	63	882	369	216	5099	6	17	2	108	11	477	319	3102	213		612
5210	3044		84	189	25	2	33	3	1005	46	37	1983	3	3	6	48	14	148	22	1432	249		691
5236	3101		183	253	13	62	3	1	602	136	63	4357	3	11	1	6	14	72	47	1859	215		611
5276	2480		30	84	9	52	42	2	307	50	29	4870	1	4	5	17	1	82	41	815	653		197
5279	3226		351	400	11	1876	14	25	1070	321	158	4607	7	20	3	40	4	630	128	3352	158		880
5349	3703		208	320	15	12	12	52	1290	151	83	2796	4	11	4	41	6	619	306	3755	158		1101
5353	4589		48	182	5	8918	6	11	201	133	64	2636	5	33	0	33	27	389	72	770	433		92
5395	2019		97	45	4	8729	7	6	347	67	36	2574	3	7	3	60	23	256	85	920	201		229
5486	3851		324	363	18	10259	19	40	849	242	162	3224	10	41	4	45	9	936	265	3006	84		1379
5535	4269		516	635	28	86	15	109	1288	472	222	4982	18	84	0	142	19	3523	503	3816	94		1988
5577	3851		115	154	8	178	7	6	272	78	43	1538	5	19	0	65	21	669	118	966	41		103
5644	2767		229	399	13	69	13	29	802	264	169	3220	9	30	2	132	25	897	292	1904	99		420
5717	3936		238	206	18	26	26	2	806	134	95	1578	4	20	1	69	3	295	259	1388	265		506
5718	2271		467	546	8	25	4	42	1155	461	234	4654	5	27	0	86	1	1272	414	2748	138		1338
5720	2523		153	250	12	7435	7	15	157	183	150	8301	8	20	3	77	12	806	185	1805	354		700
5726	2310		186	323	13	49	6	10	170	208	117	8628	7	11	0	56	21	980	103	1608	645		704
5741	2630		671	794	17	93	10	93	902	431	194	5289	32	44	2	112	18	2189	1700	2749	86		1295
5748	2324		143	192	13	3518	7	13	220	93	48	7837	6	30	2	38	18	932	244	1657	697		594
5768	3350		182	309	2	240	4	14	644	187	89	1857	7	22	1	57	7	327	218	1108	64		182
5772	3902		449	560	26	11	17	118	998	516	308	4266	22	107	3	138	32	3610	874	3580	142		1526
5778	3488		459	590	66	11910	50	92	1874	354	145	6317	30	35	6	93	33	2354	501	4658	117		3653
5779	3746		393	226	42	5620	14	125	1701	308	150	6340	23	89	8	64	24	1767	353	4454	154		2820
5784	4657		444	531	12	1020	11	23	666	373	171	3709	5	54	2	102	11	2524	382	2783	93		1009
5798	3992		355	467	22	1192	25	41	932	256	135	3694	9	63	5	59	53	1268	199	3229	137		1107
5800	3475		416	217	17	1158	20	92	1284	507	333	4693	29	60	3	119	21	2164	309	4642	67		1544
5811	3799		317	385	14	3193	25	68	1686	256	125	4405	15	101	2	132	33	3100	574	2996	148		1237
5818	2623		180	241	64	18984	9	5	686	116	85	3021	1	12	2	57	2	605	148	1262	58		1070
5822	7754		53	69	9	16884	85	86	4147	38	52	6136	24	35	20	62	24	3137	236	2560	758		2621
5831	2044		174	391	3	2354	4	16	419	240	60	3451	5	19	2	43	13	1016	267	1619	75		405
5837	3680		337	163	4	67	7	38	363	489	175	4864	10	37	0	76	30	1507	803	2063	169		1057
5860	1835		122	38	3	374	42	6	152	103	50	2181	1	8	2	38	4	352	100	1132	236		475
5874	6596		52	26	15	2049	24	43	2073	44	23	9623	12	32	3	63	39	1925	50	2634	909		1282
5890	6200		52	77	22	8	33	49	3399	62	54	8526	5	25	2	41	3	2155	129	3620	743		2324
5893	2861		142	217	14	266	9	16	439	69	54	1773	4	28	1	170	13	332	154	893	45		526
5907	3895		295	324	15	15	5	52	581	167	115	2957	6	29	0	241	68	1368	507	1354	52		1046
5921	3047		188	222	12	3037	10	21	300	90	82	2199	1	23	0	184	16	1066	191	814	68		550
5950	3011		149	236	23	2426	14	15	475	167	51	2461	3	24	0	145	10	625	241	1020	58		329
5984	3938		413	401	1	62	3	48	371	220	86	4979	10	21	0	197	15	1875	476	1222	194		901
5993	2675		185	309	22	459	13	17	364	92	63	3716	5	60	0	137	31	1492	309	1437	202		777
6008	1684		233	92	46	588	13	16	584	55	58	2112	4	27	1	85	16	440	195	1196	74		752
6009	2931		223	350	3	6230	20	26	229	194	211	2471	3	5	1	87	4	544	351	911	224		374
6017	1884		249	273	31	4262	4	16	659	312	217	2975	11	20	2	39	6	608	152	1117	195		365
6020	3862		120	35	43	207	12	32	303	189	75	2585	4	19	2	94	21	475	178	987	189		502
6024	1687		157	40	1	784	3	14	301	197	93	2816	7	4	1	29	11	784	237	855	144		200
6025	1817		152	167	0	5552	1	26	771	86	55	2361	13	19	0	28	1	598	142	736	312		112
6038	1749		70	67	7	331	6	9	532	67	24	2316	4	4	1	24	3	367	172	707	168		293
6041	2129		178	41	3	55	6	10	103	127	71	2371	2	9	1	23	4	519	155	1290	139		562
6064	4427		337	84	57	21	14	89	296	303	213	3097	4	47	1	414	33	1433	425	1025	90		2174
6086	7669		265	39	6	463	1	17	339	337	164	4584	0	15	0	71	1	1920	457	2491	164		534
6097	2096		121	240	16	9269	3	8	199	185	63	2325	8	19	1	61	6	371	157	546	119		98
6099	3506		349	0	0	55	1	23	265	453	61	6145	1	11	0	37	69	477	80	1984	186		152
6106	1840		215	214	2	3706	9	9	130	250	78	3041	1	16	0	53	3	558	319	888	223		147
6107	1550		94	26	3	3566	17	18	160	169	125	2524	7	10	2	55	6	288	90	858	245		106
6108	1865		241	363	18	5223	12	9	120	474	82	3752	4	19	0	129	12	764	437	1196	51		203
6111	2237		335	96	0	3652	4	11	92	307	82	2557	0	18	0	115	27	755	158	904	270		71
6133	1112		173	57	2	27715	1	12	121	161	54	2455	4	8	0	61	6	385	130	605	146		64
6137	2183		237	121	10	115	12	6	269	250	106	3295	1	3	2	135	7	347	167	1294	155		99
6138	1869		92	144	6	120	11	6	340	66	66	2646	10	17	4	50	11	220	76	657	122		113
6140	2271		189	279	3	5493	4	14	100	77	47	2513	1	18	2	55	11	512	165	1053	284		149
6145	2069		229	260	3	13704	0	24	71	167	88	2534	1	27	1	71	24	381	99	1255	261		52
6148	1580		169	47	8	20615	0	51	427	273	98	2663	11	22	1	87	24	204	279	1119	189		124
6154	4808		273	209	8	3585	3	34	322	118	79	3111	7	17	1	63	1	815	182	1462	540		471
6163	3664		221	216	2	4766	3	30	506	76	50	3274	5	9	1	24	1	754	128	1547	345		478
6166	1789		111	147	0	12553	0	14	379	100	24	2404	2	22	0	72	11	75	72	942	391		54
6169	3721		299	257	4	3132	5	16	157	181	145	2947	3	12	2	112	20	292	43	1336	118		307
6171	1997		116	375	2	10442	4	7	157	63	221	3598	0	22	1	114	63	52	21	1001	249		92
6174	2586		87	122	4	7304	8	6	123	66	152	2756	3	5	2	111	26	90	16	780	132		273
6177	4497		182	184	3	8964	4	15	70	44	57	2672	0	18	2	100	36	182	106	651	192		155
6194	3650		97	232	5	172	34	32	903	60	85	3666	1	75	3	26	38	572	180	1397	543		461
6195	3136		285	290	7	2490	2	21	856	86	48	3825	12	59	2	46	47	1484	123	3002	111		1888
6198	1681		132	108	15	769	5	15	307	163	63	1894	5	12	0	58	7	263	69	568	64		139
6201	3922		94	153	2	322	2	15	150	79	46	2604	0	11	1	57	21	93	62	455	213		106
6203	2359		99	104	8	141	10	20	1804	16	45	1914	2	19	4	36	8	194	109	961	168		178
6217	1840		55	46	1	5454	2	16	1132	25	60	3224	2	33	0	36	3	566	63	1172	905		266
6218	4351		79	167	11	4539	6	11	312	69	75	2281	3	34	1	66	37	387	56	979	231		222
6220	7366		191	207	3	154	11	44	1589	78	65	4383	8	40	1	89	16	1601	555	2698	140		438
6240	4609		92	97	3	5767	2	8	194	51	41	1873	7	34	0	47	25	435	124	568	195		196
6241	5457		144	219	4	3050	3	34	469	111	42	2762	10	26	1	108	16	896	238	1265	253		324
6255	8294		288	62	8	1258	2	128	290	172	85	2809	5	17	0	142	54	292	629	1487	74		670
6268	2495		312	365	1	10633	1	34	297	209	115	5100	12	21	1	245	16	833	616	1477	290		317
6284	3611		285	176	12	2178	13	52	491	320	159	4206	7	18	1	142	22	1220	220	1464	185		936
6296	3593		300	362	24	3	5	50	321	161	176	3278	9	22	0	281	8	1768	210	1758	82		1281
6390	3647		205	236	19	5070	0	56	373	83	91	1945	1	13	0	111	11	1221	443	1281	70		469
6424	3129		77	35	18	23	13	27	542	69	61	2512	1	3	2	92	13	1378	96	1819	49		822
6434	2483		210	220	14	3095	5	40	771	101	82	2591	1	17	0	35	4	990	163	1853	54		741
6445	2427		147	226	7	13843	15	5	234	77	51	2797	2	50	2	118	13	545	71	830	302		187
6680	5908		288	306	4	35	27	69	2021	340	163	4199	10	35	1	150	17	1204	640	2083	155		797
6709	4195		50	43	30	1	36	1	527	24	37	1480	0	5	9	18	3	55	43	1094	183		291
6744	1299		326	1	2	100	1	33	181	394	92	4239	0	34	0	118	42	330	484	1259	290		46
6830	1297		279	559	21	1182	22	44	750	288	97	5519	3	69	2	88	3	1109	238	3206	93		555
6900	3016		255	353	38	3494	17	45	270	224	115	4139	3	11	2	25	3	485	430	1230	124		429
6906	3010		125	159	2	22	9	5	456	90	39	2948	10	36	1	55	21	626	114	1152	172		924
6907	2780		211	320	21	8592	10	7	299	264	111	4226	3	22	2	80	45	950	388	1147	692		200
6908	3248		329	155	9	22	9	75	1444	333	145	4415	9	34	4	68	17	596	271	3798	102		677
6909	3577		80	227	26	6047	37	5	11825	15	25	3503	3	1	33	72	16	170	46	3214	144		1162
6911	3398		29	91	9	5134	35	11	1925	48	35	6016	0	20	4	37	2	476	56	1058	339		721
6917	3079		195	182	4	4735	3	20	281	140	152	3161	3	12	1	37	5	343	116	1610	381		350
6923	4437		409	468	19	14	34	66	1591	358	153	5676	15	62	7	98	13	1383	210	4891	132		1392
6933	5684		75	87	4	296	41	34	8488	51	68	3081	33	42	1	31	20	827	44	2429	596		581
6937	3480		172	216	44	19	2	24	354	145	103	2699	13	26	1	32	10	534	91	1256	91		351
6939	2435		152	286	13	1259	5	18	430	172	63	3340	5	31	2	66	9	636	177	1930	120		528
6943	2847		277	410	14	1726	6	30	1102	251	123	3827	6	39	3	67	13	1559	660	2524	188		866
6944	4712		477	532	105	437	31	72	4400	486	230	4841	12	67	6	87	8	1133	258	3079	119		2896
6957	3217		314	341	17	15	8	51	381	110	120	2508	3	15	1	163	8	1267	265	1325	34		746
6960	3933		285	84	44	8824	25	22	818	144	84	2483	8	52	16	126	21	722	387	1663	154		742
6966	3343		473	521	18	622	21	47	1218	336	241	6225	14	43	0	122	23	2157	405	3944	145		2000
6970	1655		336	345	4	2318	9	46	106	687	341	5677	2	35	0	153	20	781	243	1326	110		97
6971	2582		438	253	22	9	11	62	759	603	343	6424	15	45	2	100	20	1868	741	2502	139		693
6973	2373		168	78	13	61	9	7	451	188	49	4289	5	19	4	70	7	772	274	1355	381		804
6974	4379		221	117	14	1033	21	61	1148	198	116	3939	4	60	4	112	25	607	274	1783	91		936
6976	2716		95	83	5	9449	2	11	494	113	70	3571	2	19	2	21	12	285	162	1124	196		390
6979	3412		499	215	1	40	19	93	682	515	230	6542	6	48	1	210	31	465	259	2897	153		495
6989	2863		374	738	3	83	4	42	802	508	265	3642	0	66	2	177	16	1038	198	2013	147		361
6992	1957		171	212	18	6677	1	28	661	167	111	2420	16	16	1	24	6	738	218	913	64		448
7013	5342		390	569	208	217	9	31	500	426	220	3779	8	42	5	105	3	1646	558	3936	46		2545
7028	3717		190	600	5	4664	3	3	255	226	84	2811	5	14	3	85	18	253	178	2585	161		2338
7033	2726		469	549	38	27	21	73	1366	312	170	6666	20	41	7	46	10	1463	408	4871	75		2019
7058	3762		72	105	15	12439	9	5	497	80	52	1635	4	25	1	64	14	289	90	806	193		300
7067	2163		110	212	16	386	8	9	641	106	75	2664	6	17	4	24	22	500	129	946	540		201
7094	3139		238	305	16	1028	22	22	460	179	67	2987	0	9	6	22	3	396	199	1783	148		727
7102	4587		84	43	6	2516	8	19	1934	143	99	3597	3	50	3	81	13	672	71	2428	134		664
7103	3130		392	381	10	99	4	10	947	165	75	5276	11	27	2	204	35	358	267	2425	125		496
7106	2192		116	341	19	2474	57	9	464	114	83	2042	1	13	5	93	2	236	100	1717	144		280
7107	1139		577	601	2	8840	2	20	131	428	183	4899	3	22	0	211	9	465	356	1395	932		153
7111	2767		142	257	15	6764	10	4	643	161	51	3577	6	20	4	33	16	376	227	1250	498		751
7119	2755		146	204	32	3115	12	7	663	190	113	1776	0	36	1	30	16	343	164	1232	69		323
7161	1783		171	62	1	4584	2	16	117	175	42	2671	0	27	1	101	7	97	80	891	180		262
7164	1392		160	167	0	14679	19	10	79	65	107	3888	0	6	0	192	22	228	124	1096	103		158
7165	2516		296	723	25	10083	85	19	236	502	289	3927	0	21	3	269	23	424	317	1561	345		610
7167	3743		275	488	136	650	37	66	2941	322	306	4858	11	75	5	452	18	1094	364	2531	96		1970
7169	6563		198	83	1	292	1	18	159	112	75	2920	1	15	1	80	3	477	86	1113	475		790
7186	764		125	85	0	2974	6	13	78	124	34	5043	12	9	0	37	24	67	63	1230	204		57
7202	4161		139	76	98	7025	49	6	920	174	87	1856	6	19	3	55	3	246	79	1553	32		909
7218	2084		159	220	3	8862	7	15	401	117	55	2691	2	34	2	70	8	305	120	1040	303		369
7231	3071		307	413	17	735	13	19	456	220	74	3449	8	15	4	59	9	720	466	2734	126		1310
7244	2553		204	497	8	29	11	10	532	160	94	3184	0	10	4	141	3	421	127	2778	321		869
7248	2385		224	403	14	108	9	10	874	155	57	3831	7	36	3	72	5	618	173	1287	162		403
7250	1829		248	604	2	73	4	15	123	213	87	2567	2	18	1	418	34	193	154	1796	111		309
7263	1924		229	214	13	34178	0	14	104	231	99	1750	3	26	0	71	7	537	184	620	36		154
7282	2994		118	164	13	1759	24	6	611	79	35	2072	7	23	2	53	7	278	70	1894	56		558
7288	2959		155	292	24	53	6	16	478	168	75	3987	9	76	2	129	58	550	178	1578	220		379
7296	2992		88	190	16	5	23	2	808	37	59	1921	5	20	2	34	26	90	197	1404	148		655
7308	2595		177	245	7	141	37	20	480	144	51	3527	3	12	1	43	8	281	100	909	569		78
7316	4455		338	253	1	266	3	55	817	101	118	3633	4	42	1	70	5	766	307	1515	154		514
7320	4096		274	632	21	20221	10	38	640	236	76	2856	4	56	2	60	14	1545	697	2831	892		765
7322	5978		26	39	24	665	58	23	2517	39	35	8384	9	27	7	26	4	1378	49	1913	759		1087
7327	3982		270	335	27	2773	40	60	1255	169	108	4483	8	60	2	91	14	1485	155	2231	197		657
7328	6064		34	20	8	29	19	36	2259	53	24	7907	6	58	2	52	10	2493	207	3030	1224		813
7330	3726		190	83	17	842	35	32	741	121	59	1742	4	15	2	57	30	943	400	1310	812		593
7346	8888		204	288	17	948	17	45	1412	161	102	4025	19	67	4	53	20	1755	370	2272	98		3155
7350	2063		233	299	6	5307	9	15	339	194	39	2521	4	42	1	68	2	827	849	1326	299		289
7353	3429		248	383	20	3300	44	65	257	218	92	4052	10	14	2	113	46	1485	256	1001	122		1258
7354	2870		555	572	6	5956	4	106	708	467	184	5216	11	65	0	94	4	2193	644	2667	81		792
7355	1856		235	81	6	820	2	35	298	352	110	2751	17	23	1	74	12	663	657	909	252		122
7372	5470		69	105	12	2166	17	56	1194	49	63	5940	7	37	2	97	16	2050	163	2306	945		1503
7373	3836		122	165	21	15	76	12	675	102	73	4166	4	15	2	54	9	782	140	1343	416		377
7377	1813		255	371	15	89	3	25	536	358	223	5302	2	41	1	80	12	1403	218	1421	70		227
7384	2319		223	7	16	675	10	16	492	240	171	3607	3	20	1	60	4	1248	310	1058	449		182
7396	4432		86	81	31	5810	82	25	1485	83	45	4726	9	19	4	14	3	592	232	1466	642		704
7404	2676		419	507	11	62	13	99	427	548	227	5692	5	91	1	161	11	1451	320	1975	315		863
7413	2618		213	191	15	4644	29	18	210	146	64	3715	3	13	1	70	10	774	194	1038	675		279
7418	2887		214	0	6	21	25	51	1567	136	84	9352	4	16	1	75	9	1432	190	2001	483		1501
7424	4316		244	481	136	1893	90	95	4496	151	137	3954	39	43	10	93	8	1624	298	2574	77		3396
7427	3875		178	321	6	25	28	53	841	565	168	4074	10	48	1	169	19	1784	206	3689	96		581
7458	2355		424	264	23	416	11	31	515	274	113	3322	2	29	1	112	8	1636	302	1640	85		562
7461	2725		176	184	13	22819	6	15	255	75	76	2077	2	29	0	138	15	198	92	571	61		208
7477	8185		65	81	12	33	32	35	5059	57	32	8740	11	59	12	59	17	4383	233	4392	1009		1921
7515	3843		351	422	5	57	5	33	1846	252	117	4874	11	93	3	115	11	1854	297	2253	105		1085
7517	2466		174	267	7	7718	4	45	97	248	84	3439	4	12	0	173	17	375	286	1209	64		303
7521	5087		93	227	58	30	2	84	368	189	53	2283	11	19	2	37	12	490	168	1231	51		668
7717	3431		556	784	31	29	54	110	1724	658	485	7291	39	142	3	186	11	2460	1599	5380	138		1277
7917	7967		102	155	12	9664	15	65	8270	61	81	3784	37	79	0	50	15	1620	159	3037	309		2462
8077	3671		470	452	13	166	17	37	761	379	260	4271	7	21	3	146	15	927	327	4463	188		1067
8132	2223		258	287	40	1206	37	24	1487	164	95	3912	15	23	5	120	10	542	136	1675	75		1239
8231	3252		218	112	53	91	17	14	731	166	98	3435	0	11	4	61	2	419	161	1603	120		485
8233	3357		166	362	26	99	33	11	1029	90	89	3068	12	23	8	29	11	1330	125	1584	190		1718
8234	3675		436	267	17	1583	16	98	1254	421	199	5272	17	46	4	39	12	1241	455	4759	134		1578
8235	4395		141	192	8	1414	14	12	662	82	42	3842	4	20	0	107	11	562	190	735	384		453
8236	2639		205	172	16	9	8	33	231	196	138	2549	5	18	2	137	10	375	254	986	108		711
8238	4814		427	466	40	952	90	202	2981	413	281	6475	12	67	15	65	16	1709	291	5682	107		2204
8239	2761		344	369	281	10	15	67	813	459	171	4040	10	50	2	322	15	1879	412	2951	24		3428
8244	5454		470	437	32	867	45	142	2286	236	158	6550	21	125	3	112	36	3176	432	5884	124		1628
8246	3547		371	297	22	66	37	78	1234	293	103	3818	9	34	6	88	13	1116	524	3035	67		1101
8247	2530		197	179	5	5691	5	19	259	140	78	2900	0	13	1	70	4	478	118	1013	273		238
8259	3185		172	98	4	7689	10	81	491	277	142	2650	7	15	3	85	8	508	229	1590	113		567
8264	4899		13	71	22	10	48	24	2559	36	51	7790	8	21	4	30	3	1594	40	2130	727		1687
8266	2954		292	88	8	3	8	37	289	224	117	3106	2	13	4	66	8	261	221	1976	135		452
8275	3218		250	248	24	132	0	50	197	125	104	1962	5	11	0	46	15	673	294	896	23		1309
8284	2673		114	122	8	14	5	16	720	154	51	2404	7	12	2	46	9	192	135	796	125		318
8290	2544		137	220	10	174	5	9	415	204	97	2927	7	24	2	48	11	899	151	1153	114		327
8297	2072		163	92	11	43	11	22	562	247	172	3655	12	26	3	19	4	260	72	1686	91		482
8325	3550		142	316	3	4284	7	26	341	317	86	2042	4	10	1	74	0	258	96	1565	265		180
8334	3366		57	188	16	18481	7	6	317	106	63	3135	3	31	5	60	12	297	83	1107	295		174
8337	3716		231	105	6	5941	2	18	199	284	120	3163	22	48	1	106	5	1386	653	1474	1124		80
8343	4538		196	86	63	26	7	21	528	215	75	3168	5	68	3	130	12	1311	202	2792	198		974
8351	3226		116	151	12	14608	9	6	317	109	63	2249	0	18	1	49	17	483	180	1010	169		289
8353	891		287	101	11	1864	20	3	192	171	94	4811	5	25	1	154	18	124	96	1561	64		175
8357	3380		202	201	22	49	18	19	804	66	95	3676	0	21	9	119	4	1788	289	1473	202		1068
8365	3072		136	241	26	2057	4	21	419	123	50	2328	4	21	0	51	18	500	273	1018	100		331
8366	2930		291	435	17	15	19	30	414	292	180	3992	9	33	4	69	15	1000	339	1988	87		760
8378	6941		80	91	13	258	36	59	2976	51	28	7121	14	64	10	47	21	3002	93	2088	597		1165
8386	2726		125	55	2	11703	21	7	410	42	49	2939	1	12	2	50	3	372	154	824	511		614
8419	4315		219	269	33	74	37	77	2742	167	123	5444	20	63	7	78	9	1160	198	2684	140		1622
8424	3192		204	323	46	19	32	59	321	209	90	4411	5	33	5	90	13	355	99	2858	163		560
8428	3682		127	146	16	24521	10	6	483	56	33	1287	1	10	0	105	8	172	59	636	66		510
8430	2983		90	164	12	33	20	10	560	139	53	2167	2	14	4	15	5	135	51	759	81		376
8472	4267		265	261	37	5426	45	13	805	87	46	3865	34	9	7	54	24	1045	275	2537	193		2475
8584	1862		99	203	1	64	3	6	61	59	45	2347	1	13	1	71	13	157	93	1015	91		35
9067	4271		370	303	32	9979	78	66	2197	251	245	3857	10	10	24	121	1	517	2	3064	85		665
9075	4709		493	558	29	32	62	171	2996	381	322	6940	20	81	9	85	12	2070	3	5579	186		2031
9078	3173		399	462	6	32354	35	94	2136	352	279	4927	12	21	12	81	5	813	1	3389	148		1203
9079	3108		226	254	17	28691	19	23	866	187	217	2956	4	4	11	121	17	325	5	2597	137		321
9081	5622		472	451	25	15931	34	117	2586	387	300	6702	17	23	15	102	4	1230	2	7105	207		2371
9084	2385		436	497	12	19653	34	95	1209	454	312	8111	13	45	7	144	23	1463	769	3463	161		671
9085	2356		383	463	14	17886	39	76	1571	340	286	7620	11	33	9	146	26	1498	672	3840	179		671
9089	2783		359	155	11	22549	15	76	1579	262	193	7221	18	24	4	88	16	1387	1	3541	270		912
9091	2878		351	276	23	31501	52	60	1471	205	164	4167	7	27	4	101	9	610	2	2650	781		735
9095	3414		217	91	17	37695	25	56	1322	162	88	4816	9	31	4	55	6	1088	1	2674	626		595
9099	2505		209	409	20	114	45	21	11	233	194	3357	3	28	7	132	18	482	1	1616	405		236
9100	5136		30	20	20	22425	25	21	2693	47	27	10699	22	28	4	71	4	2023	229	2321	1041		1293
9102	3302		157	52	18	97	14	50	2094	134	72	6039	10	49	4	79	7	1417	257	1890	851		808
9103	3843		136	121	19	8255	28	55	1822	116	56	4615	13	22	7	57	10	727	0	2261	971		1056
9104	5249		55	31	15	20141	42	17	1490	53	63	9625	4	33	3	107	1	1360	176	1447	718		490
9105	2824		135	34	15	42340	10	21	2452	232	150	4411	7	37	2	61	12	823	222	2301	269		744
9106	3966		239	65	13	76679	23	16	991	248	170	4420	14	41	2	69	5	639	1	3180	817		927
9111	2930		143	59	6	25001	17	60	1951	136	77	4712	5	29	3	98	11	985	233	1977	1049		515
9113	4340		264	83	13	62	26	57	2048	252	131	6115	14	57	6	125	11	1843	0	3117	803		1470
9114	3557		200	52	7	7330	15	27	1068	170	102	3921	4	17	1	75	2	336	388	2973	503		744
9115	3454		162	46	6	9188	11	21	1244	116	75	3776	3	25	1	64	6	346	293	1983	603		672
9121	4164		251	304	21	35307	36	96	1789	232	114	6667	12	18	6	79	9	918	275	2836	350		1428
9125	3339		258	317	37	41616	118	67	2561	84	110	6101	16	64	10	105	10	1491	250	2528	245		1355
9128	4785		333	426	37	29376	76	116	1925	366	215	8639	20	76	7	194	31	2064	399	3525	436		1694
9130	4894		308	433	42	35887	105	140	2361	326	248	5879	19	72	6	208	26	1350	420	3166	141		2000
9131	4174		303	310	44	29552	73	65	1437	259	153	4250	6	29	6	161	10	1184	348	3248	133		1706
9133	6436		428	424	22	32066	76	120	6029	164	222	5739	32	58	17	129	12	1752	416	4723	105		2290
9134	4697		371	408	34	18873	122	129	4818	149	164	5392	24	83	12	157	9	1873	355	3735	92		1870
9298	3687		290	375	15	2965	11	14	920	266	131	3286	7	33	3	98	35	722	127	2555	143		643
9312	2830		418	702	24	22	18	39	1394	422	198	4995	17	31	2	119	4	1456	522	5352	111		1683
9314	4682		296	324	14	189	12	56	1938	190	98	3771	27	71	6	82	25	1630	242	3263	94		1480
9321	2420		167	166	3	3224	4	12	229	97	131	2771	5	2	1	91	16	553	51	1017	274		234
9386	2383		177	306	2	18941	11	20	90	187	124	3292	6	21	0	98	26	254	226	326	116		74
9388	1831		166	220	1	243	6	12	125	85	107	2683	5	15	1	42	22	452	61	678	140		223
9404	2539		137	164	11	6132	2	11	493	137	64	2204	1	13	2	28	9	283	90	747	142		329
9405	4363		175	193	18	7501	5	14	388	100	86	2732	4	10	2	26	1	430	106	982	200		409
9408	3791		90	26	15	3222	6	10	545	40	20	2131	3	13	2	22	10	193	162	626	261		250
9409	3693		91	30	7	3167	4	7	335	119	51	2127	6	8	2	4	2	446	209	726	203		256
9421	1490		208	95	0	206	5	16	132	256	56	4521	0	11	0	25	15	309	114	766	89		142
9433	3774		142	58	8	42	3	20	119	137	106	2668	3	29	0	150	27	446	198	1307	199		209
9451	1955		97	149	3	5054	4	9	182	78	38	3000	5	12	2	49	5	381	203	1048	204		347
9503	2950		237	178	16	138	13	12	301	256	123	2730	1	26	2	48	7	1458	223	1580	124		202
9506	3599		231	356	20	41527	0	51	1041	259	141	5235	8	54	0	119	3	1905	180	1759	120		1088
9507	1944		136	34	0	10734	5	22	139	137	76	4813	0	39	0	242	42	109	258	1179	331		60
9508	3311		594	158	11	514	8	32	1466	643	253	6136	11	81	2	96	22	3173	785	3472	92		1532
9509	4809		232	79	7	1130	46	31	1113	116	73	4952	2	77	4	122	47	822	217	2480	352		1303
9510	4870		147	248	28	26	11	17	310	105	53	3631	0	10	2	115	56	510	0	1472	133		545
9511	4465		150	77	1	3855	11	28	464	167	82	5751	7	44	1	89	17	609	208	1612	189		499
9512	3247		131	229	2	4834	17	10	730	41	48	4616	18	64	2	40	13	841	154	1563	192		940
9513	3216		115	115	3	3505	8	20	536	135	77	3488	1	30	2	126	31	506	15	1739	139		456
9514	3993		167	318	14	3759	0	9	386	147	45	3822	2	30	1	99	20	629	0	1519	139		169
9515	3970		132	177	3	4302	3	45	1304	96	63	5474	0	33	2	85	13	698	90	1499	232		390
9516	6663		109	219	17	11	38	29	590	94	39	4084	3	69	3	131	46	585	65	1256	168		353
9517	1439		118	47	6	3110	100	8	549	61	38	2471	0	33	4	50	18	91	48	1146	80		144
9518	6699		237	279	14	3793	1	99	226	173	86	4049	1	40	1	139	22	775	124	1579	143		356
9519	3685		387	157	25	182	2	103	228	340	174	6773	5	37	2	95	15	1941	515	2755	323		163
9520	2825		235	132	7	69	2	35	405	355	171	4751	7	15	1	84	26	612	286	1880	722		180
9521	1047		150	88	8	545	11	14	631	137	109	3702	0	24	1	40	21	276	70	787	595		52
9522	2505		121	301	3	9	24	43	1025	197	87	4642	21	54	2	109	27	402	475	1709	111		503
9523	2286		122	39	5	111	24	23	565	222	106	4418	5	15	0	92	31	871	47	1239	179		530
9524	3140		282	107	13	37077	11	51	203	450	208	7800	6	18	0	217	14	1963	234	2268	137		500
9525	4812		322	358	46	21	11	83	861	391	360	7093	9	21	0	138	3	1008	204	2541	173		895
9526	3702		179	367	28	54	1	21	513	255	90	3743	6	42	1	90	96	421	145	992	221		99
9527	2945		233	51	0	143	15	8	533	194	112	4292	6	17	0	123	20	274	281	909	92		215
9529	5617		255	277	8	7687	37	79	720	170	92	3265	15	44	1	114	65	1091	378	2154	644		560
9530	3716		90	150	6	141	67	21	372	133	51	1989	15	35	1	141	16	752	2	740	512		67
9531	1482		288	184	0	45	18	16	44	208	104	2986	0	38	0	152	45	202	4	822	66		67
9532	3584		143	59	1	101	3	3	590	180	70	4840	7	8	1	58	13	487	33	1215	236		128
9533	2761		211	41	13	3257	14	30	390	171	117	3394	10	22	2	55	18	396	27	952	191		906
9534	3393		77	165	1	6082	1	17	444	82	64	4480	8	14	1	121	5	341	23	907	138		114
9535	2560		184	219	7	58058	10	12	497	205	136	4819	9	26	0	146	21	982	162	1040	115		162
9537	5644		207	355	12	100	3	21	349	198	76	4061	18	39	2	81	24	582	653	2121	445		382
9538	5330		224	213	10	26	7	31	1523	229	128	4321	10	31	1	72	10	1205	136	2107	96		726
9540	4037		150	201	2	9	3	14	546	172	187	5048	15	21	1	62	19	792	226	1262	320		706
9541	3240		135	57	4	2307	11	5	1736	222	100	3958	7	0	2	82	9	689	722	955	353		408
9542	3461		195	65	7	1406	197	35	915	150	85	3793	0	6	4	37	53	283	258	1071	137		703
9543	3241		98	276	6	2398	109	13	966	130	93	5559	14	28	3	54	34	805	38	1371	48		1622
9544	2828		129	80	7	12441	9	17	200	127	58	2706	4	33	1	114	43	353	227	970	40		103
9545	2276		157	45	23	5851	42	12	590	113	84	3546	17	17	2	119	32	206	18	957	166		885
9546	1670		106	265	1	140	19	10	200	47	91	3290	1	10	1	160	23	29	145	1001	216		3
9547	821		195	225	1	41	22	18	177	258	89	5363	1	33	1	60	14	240	148	1487	583		59
9548	760		250	294	4	15	12	10	246	182	196	6110	2	22	1	69	24	323	3	1210	467		227
9549	1718		264	110	31	3154	20	23	264	306	194	4653	8	23	2	46	7	238	15	1541	84		479
9550	1653		109	154	11	7107	13	41	1200	127	73	3547	1	34	2	52	14	737	70	1135	173		370
9551	1891		80	20	2	17	12	8	194	82	68	2793	0	14	1	112	36	113	51	679	297		76
9552	2702		85	40	53	43	73	16	802	94	94	4096	2	45	6	49	8	241	151	959	182		430
9553	3509		104	31	6	112	37	14	1086	136	69	4591	1	13	3	75	5	816	60	2038	106		891
9554	3412		383	67	17	1515	139	12	670	218	108	4293	7	8	3	42	29	820	43	886	329		662
9556	1753		96	204	9	272	0	33	413	224	88	3837	11	17	0	64	0	688	157	1003	125		133
9557	4301		147	216	9	52	10	19	434	298	104	3893	4	29	0	192	38	950	157	1205	306		438
9558	2910		198	132	24	16	6	22	1060	263	267	5672	9	14	2	72	4	2124	224	2025	76		702
9559	2351		314	53	1	76	18	51	123	239	166	5451	3	30	0	156	14	955	108	1174	149		141
9560	2910		218	176	14	86	14	39	509	284	142	7015	18	25	1	79	1	1978	270	2611	90		1316
9561	2588		226	114	11	5224	14	17	262	403	185	4230	8	31	0	199	18	431	273	770	185		75
9562	4098		353	698	21	10	11	62	1445	550	369	6985	13	28	1	92	7	2692	589	4341	299		3161
9563	2057		224	327	22	69	23	6	450	264	127	3649	1	17	2	121	9	465	184	1140	135		401
9564	1649		257	485	2	3731	30	59	850	371	163	4196	12	64	1	155	14	622	341	2069	100		379
9565	2335		235	65	4	6675	8	85	1020	161	151	4709	1	31	3	61	7	1919	174	1788	96		1628
9566	2225		304	101	6	4746	9	36	187	135	210	4739	1	17	1	184	16	1032	164	1763	60		272
9567	2281		260	460	33	3580	33	34	631	292	309	4366	5	10	1	216	25	1204	280	2859	39		382
9568	3832		409	128	10	26384	23	107	1078	351	165	5820	9	42	1	159	12	2185	511	3647	119		974
9569	4133		187	330	22	3852	14	55	2331	269	148	4324	25	27	2	96	15	1296	183	1890	157		1086
9570	2070		162	191	1	48	28	30	358	192	174	5078	0	25	1	150	33	296	134	1179	154		336
9572	3942		387	482	10	78	6	39	598	361	265	6082	33	68	2	108	30	984	395	2511	549		1121
9573	2913		134	206	6	140	2	9	535	109	88	2798	9	6	2	83	18	416	122	1209	548		57
9574	2042		235	193	24	2	2	52	476	373	95	7058	2	14	2	106	37	428	52	2478	37		196
9575	1938		199	108	1	72	9	29	33	189	90	4427	11	4	1	108	60	116	156	2013	111		60
9576	2755		194	90	8	25211	49	41	262	233	204	4406	1	17	2	131	59	215	219	1971	275		113
9577	1214		188	287	11	28670	25	39	370	146	143	5185	1	27	2	180	28	444	104	1468	279		190
9578	2217		123	244	1	39	17	16	158	152	132	4098	0	35	1	138	49	216	118	1606	89		41
9579	1854		195	67	5	2478	16	35	388	251	117	4981	5	34	1	176	45	375	65	1160	58		65
9580	1358		144	56	1	119	4	17	290	262	162	5176	0	20	1	119	29	373	0	1192	202		113
9581	867		160	245	0	15675	0	16	234	110	140	7184	0	25	0	85	9	308	49	1140	261		25
9582	1493		180	372	31	13	32	41	891	278	173	5984	10	25	4	129	43	671	177	2554	188		606
9583	2728		106	241	11	3107	17	47	517	262	99	3235	7	44	1	42	11	866	1	2599	48		499
9584	3600		300	151	17	7082	3	35	200	190	145	4901	6	45	1	124	15	921	496	2192	318		358
9585	1055		283	355	2	2751	35	66	1030	273	140	4824	2	25	2	56	16	150	110	2894	314		132
9586	2060		378	445	6	64	18	25	343	283	144	4039	3	20	0	90	21	611	154	953	79		208
9587	4267		217	133	7	83	7	0	169	290	203	5222	7	33	0	89	17	731	213	1473	227		226
9588	4000		247	444	3	21960	3	44	555	249	93	3358	1	12	2	144	87	245	145	2160	143		437
9590	1121		117	14	5	95	2	10	342	159	86	2259	8	16	1	47	4	91	37	1038	198		22
9591	3794		148	46	12	39	38	34	673	156	77	4038	2	78	3	89	29	832	199	3138	823		1011
9592	2836		281	192	1	17955	14	92	236	296	90	4418	11	38	1	78	16	673	187	1583	411		708
9593	3922		170	231	13	16291	9	16	184	135	87	4038	4	29	1	118	48	507	253	1330	939		137
9594	3702		146	243	17	29	11	24	508	239	161	4595	10	17	1	86	18	1004	136	1106	142		645
9595	2665		458	141	2	16088	7	47	190	229	144	6729	21	40	1	102	13	740	37	1265	371		166
9596	2426		495	114	20	8212	10	28	460	381	123	5543	5	66	1	79	16	1861	286	1908	159		1122
9597	1292		155	123	0	350	6	12	119	193	130	4904	10	19	0	126	30	461	297	1208	570		218
9598	1993		357	132	14	1317	15	16	113	708	87	4478	9	33	2	84	28	475	267	1538	358		232
9599	2554		84	48	30	77	2	4	490	246	129	4349	14	9	1	72	4	245	168	1363	474		181
9600	3314		296	60	36	107	13	49	1258	218	90	2723	32	30	1	63	18	637	371	1391	605		779
9601	1803		179	295	16	401	14	53	1085	141	138	4832	6	11	1	62	2	1176	221	1772	128		203
9602	4495		312	475	32	42	44	113	2828	340	205	6155	9	51	1	199	28	2994	500	3550	131		2558
9606	2857		285	292	12	866	7	25	355	116	115	2885	4	49	2	258	29	1224	394	1037	29		751
9607	2491		181	186	10	9022	15	45	320	117	104	2973	2	15	4	53	6	886	185	1290	197		883
9608	2673		322	366	10	18445	4	16	288	107	69	2576	1	34	1	234	36	1031	218	822	42		488
9609	3575		210	302	25	174	13	21	393	156	83	2823	3	47	7	195	39	1513	269	1660	220		400
9610	4478		223	550	64	1223	24	32	1840	151	78	3221	7	40	4	40	6	1464	426	3648	86		856
9611	3206		440	547	9	4894	3	30	147	236	236	3185	3	36	1	526	75	560	286	1026	171		584
9612	3502		247	331	28	9930	11	26	420	195	122	2432	0	23	1	186	12	1359	255	1335	38		759
9613	2464		152	187	7	907	4	13	423	78	38	2654	3	17	0	38	4	897	168	1308	76		316
9615	1887		205	261	27	7275	9	8	665	159	67	2568	3	19	5	56	6	238	110	1302	78		758
9616	2025		284	328	21	12838	10	20	360	189	85	2905	5	28	2	135	15	289	217	1536	337		429
9617	2984		244	79	22	17489	10	35	377	212	70	1822	6	48	2	135	12	318	204	1119	122		264
9619	2534		204	65	35	274	37	24	310	195	119	3432	4	25	2	237	15	634	201	1277	329		219
9620	2589		238	78	45	255	39	26	268	236	150	3336	4	31	2	329	22	642	273	1297	217		276
9621	2172		244	102	31	245	25	28	230	229	143	3902	10	26	2	443	10	1013	187	1150	101		405
9622	2990		240	115	9	17	12	13	460	196	94	3679	1	35	2	214	17	1196	358	1384	113		1059
9623	2754		150	259	10	7	12	8	226	142	68	1716	1	18	4	352	28	72	120	713	73		127
9624	1723		150	155	12	31519	5	11	123	190	85	1888	5	21	2	190	11	573	179	484	138		81
9626	2522		189	368	57	6008	52	16	674	113	76	2837	0	18	7	159	40	627	315	1430	252		446
9627	2153		241	307	7	126	3	38	989	224	101	4415	10	90	1	104	11	1330	340	1782	193		912
9628	3490		167	386	41	73	41	10	722	121	50	2405	7	12	5	26	7	476	296	1139	156		392
9629	1849		216	409	34	12968	21	13	161	249	77	3461	5	32	2	210	34	521	433	668	191		149
9630	2008		80	210	5	204	6	1	168	61	80	2428	4	7	0	301	16	177	109	562	173		89
9631	1796		204	299	7	4592	5	8	174	212	37	2209	6	24	1	354	47	245	189	558	102		90
9632	2169		93	59	12	8785	6	4	290	107	26	2030	3	14	0	22	0	553	191	852	132		146
9633	2465		211	57	9	227	10	25	201	244	112	2859	4	17	1	238	24	901	194	938	91		142
9634	3127		224	42	4	122	1	18	272	81	42	3914	5	75	0	118	48	2251	276	2232	148		765
9636	1900		103	31	10	10069	19	12	217	101	50	2421	3	19	0	217	27	631	120	583	183		209
9637	3347		109	53	30	596	32	28	702	83	52	3635	6	28	3	130	9	696	140	962	399		577
9638	3020		117	39	14	65	10	15	181	107	68	1675	1	24	1	247	18	300	99	523	111		159
9639	2336		209	78	9	43	27	75	586	147	79	3635	2	16	2	172	65	555	323	1002	112		558
9640	3773		172	51	13	39	17	21	358	137	78	2071	3	21	3	223	41	696	151	834	74		509
9642	3535		136	62	10	57	9	40	267	148	96	2421	3	34	1	371	32	562	226	810	83		375
9644	1306		174	181	13	5983	1	18	348	248	51	3239	6	8	0	121	11	525	217	806	80		184
9645	2329		276	107	23	3123	5	16	389	116	86	2035	1	14	1	226	10	555	532	1321	90		452
9646	3059		177	85	8	8016	13	11	256	242	120	3519	12	2	3	10	6	179	425	1824	192		395
9647	3450		412	460	13	4280	3	34	361	246	178	4528	9	68	2	270	50	1385	361	1257	51		1281
9648	2626		334	329	27	6200	5	29	391	269	121	2863	4	26	2	87	15	1075	457	1143	139		709
9649	5290		373	135	39	4550	9	131	1846	350	102	4105	9	57	1	148	50	2093	524	3217	51		1945
9650	2711		72	94	9	624	38	6	253	44	69	2699	4	7	4	48	4	960	131	962	490		389
9651	1601		122	76	9	8809	5	2	124	80	38	2616	4	25	1	56	9	213	134	496	303		158
9652	2925		167	53	11	100	22	17	227	207	111	3724	6	22	2	224	44	822	133	1468	149		190
9653	3964		235	274	14	46	14	14	457	183	95	2837	2	23	3	135	12	1596	150	1637	97		666
9654	3857		290	273	12	47	11	27	276	142	162	2224	1	13	3	200	20	484	438	1543	50		639
9655	5490		245	368	50	10008	14	44	1731	332	131	4589	6	28	2	128	15	2052	501	2751	126		1080
9656	4511		264	429	47	105	28	27	1332	394	177	4518	5	48	3	155	19	1531	514	3364	156		562
9658	3042		324	167	27	51	20	29	307	402	221	4257	13	39	2	275	61	1518	429	1367	122		1249
9659	2806		287	71	15	3671	8	42	162	202	155	2863	5	19	0	275	48	835	411	843	128		425
9660	2339		206	78	8	837	7	28	472	246	149	5410	7	29	2	36	15	1514	370	3160	166		822
9661	2304		179	64	13	7	10	6	227	189	166	3313	0	18	1	346	52	586	189	889	126		325
9662	2343		101	193	15	83	5	16	409	93	91	3201	2	16	2	73	8	834	265	1054	94		396
9663	1567		8	50	15	9251	9	0	301	43	3	2011	4	8	1	31	0	12	28	938	1036		234
9665	3915		163	71	5	1285	5	20	226	84	68	1191	0	13	0	114	7	75	169	684	31		229
9666	2883		321	331	6	2593	8	26	653	249	142	3605	6	23	1	78	17	929	328	2262	133		567
9668	4076		171	219	7	1901	7	17	270	100	129	1880	2	19	0	152	16	138	128	765	46		434
9669	3058		65	152	12	8420	14	3	489	77	42	2078	1	27	3	53	8	608	160	1199	284		488
9673	3619		96	119	16	55	3	14	478	67	44	1654	1	23	0	46	1	758	191	813	48		576
9678	4189		207	71	22	134	15	25	347	233	126	2201	5	41	2	122	7	1940	245	1569	74		480
9679	3957		186	243	17	1102	13	35	298	105	98	1807	4	17	2	222	11	475	98	913	41		616
9680	4234		230	270	25	1010	16	37	432	150	98	2181	3	28	5	244	16	699	153	1025	52		883
9681	3829		209	248	20	1847	17	32	326	119	92	1613	5	16	3	179	10	331	122	922	39		535
9682	2723		99	174	17	10964	8	6	637	78	71	1816	5	14	1	61	0	485	69	879	144		173
9683	3757		179	245	17	1167	14	20	283	94	91	1806	3	11	2	235	8	386	92	806	30		456
9684	2492		276	353	8	10	6	21	1016	222	116	3095	6	4	4	30	13	619	525	1941	84		757
9690	2536		207	422	10	4818	11	15	378	268	117	3761	9	49	0	96	3	596	151	701	44		216
9693	3204		170	200	21	508	13	19	360	165	72	2333	2	27	2	110	12	396	179	685	61		324
9696	3622		156	192	26	5496	27	14	427	161	65	4205	3	38	0	45	6	606	77	1620	103		214
9697	3664		227	69	6	24866	38	17	668	62	69	2313	9	12	9	117	27	445	228	725	124		421
9698	2374		230	322	10	13506	29	30	411	256	265	3415	14	38	2	148	21	715	404	748	130		219
9699	2021		273	97	45	5527	17	42	467	190	109	2874	3	14	6	30	4	883	520	2301	257		723
9701	2441		142	219	4	193	4	27	333	101	29	2594	2	25	1	69	20	375	155	1233	177		427
9702	3979		219	64	15	58	5	22	631	292	135	2689	3	15	1	129	26	435	366	1592	73		850
9703	3849		234	70	14	7	10	34	305	132	87	2929	1	12	0	120	19	1082	467	1331	43		965
9704	4671		383	108	12	366	12	65	621	400	215	4335	10	46	2	64	14	1535	436	3435	71		529
9705	2560		158	49	30	30	14	11	441	54	80	2508	3	24	0	124	2	2116	254	1439	42		678
9706	4675		208	127	27	169	5	45	458	97	126	5182	0	34	3	39	1	543	173	1704	195		1424
9707	2982		133	208	22	142	17	15	318	122	104	2350	8	14	2	106	9	720	114	1067	159		409
9708	1118		37	65	11	102	8	3	516	61	18	5324	0	1	1	50	6	33	18	1275	1056		308
9709	2671		216	313	15	61	9	20	207	134	60	3337	0	19	0	130	8	505	251	1055	250		278
9710	2765		191	327	6	67	20	14	251	314	113	4720	2	19	3	117	9	1281	363	1735	275		178
9711	2375		71	151	4	14562	5	2	902	81	35	2040	0	14	3	31	5	72	101	1097	77		125
9712	3771		266	348	24	23	7	24	375	116	148	2649	4	25	3	262	20	1029	498	1083	51		886
9713	3479		310	341	23	58	14	17	740	156	87	4396	6	60	2	132	20	2926	505	1954	258		948
9714	2702		137	42	23	1495	31	13	390	109	56	2763	2	30	11	42	6	886	107	1066	402		212
9717	2162		84	175	16	70	19	9	340	84	58	4006	1	4	3	42	6	424	254	1292	329		600
9719	3794		243	128	33	29	23	72	543	159	132	4323	13	35	1	304	24	1464	247	1477	73		974
9720	2589		222	265	9	1296	52	26	307	242	73	2320	9	6	0	111	21	865	176	943	685		148
9721	2554		216	260	26	348	14	15	811	145	89	3428	3	37	7	55	7	1394	340	2730	228		416
9722	2247		60	18	8	2671	16	5	212	67	62	3647	8	3	2	18	4	133	141	768	619		98
9723	3929		399	278	1	1124	1	7	254	157	151	1981	5	20	0	228	19	625	141	913	27		553
9725	2752		81	156	19	22	19	6	238	71	61	3172	1	7	6	112	5	79	77	824	224		233
9726	5101		253	304	27	10906	16	34	263	165	138	2722	3	28	4	195	18	743	284	1713	72		1064
9727	4270		317	350	7	1333	5	75	227	217	194	3092	4	41	2	223	76	929	333	1326	41		551
9728	2806		279	392	18	36	4	57	384	154	101	3628	12	37	0	332	43	1333	381	1027	84		687
9729	4108		338	359	27	17	81	25	977	498	253	4217	1	30	12	143	9	1623	608	2448	234		718
9730	1454		52	73	14	18083	35	11	1343	62	26	1819	3	6	5	23	6	133	46	806	306		125
9731	1898		177	249	34	67	22	13	456	97	72	2707	5	4	8	84	11	413	258	964	219		353
9732	2090		70	109	16	10557	18	8	490	78	44	2608	1	3	5	56	4	372	109	625	154		257
9733	1077		219	253	14	318	23	35	361	283	80	3725	5	10	1	104	7	954	162	1112	76		570
9734	2587		225	398	7	1990	8	6	614	281	170	3575	11	21	4	51	31	371	156	1182	87		455
9735	1960		151	144	24	4047	4	10	1278	137	88	2148	0	14	1	72	4	592	136	1387	52		482
9736	4147		248	371	22	185	37	40	466	279	108	2404	6	23	9	110	22	201	209	1366	384		283
9737	5032		382	421	19	1558	59	78	674	258	142	3924	7	43	3	140	24	1640	602	1901	167		1092
9738	4291		169	182	6	239	13	40	697	121	94	3375	10	46	1	92	23	1093	173	1441	306		620
9739	4408		255	338	7	289	20	63	1040	254	136	3135	11	61	6	135	22	642	359	1457	111		1048
9741	2217		136	189	24	6270	67	13	582	172	60	2621	10	7	9	50	5	416	236	861	214		297
9742	3163		313	95	19	62101	8	54	293	183	114	2694	6	26	2	279	32	828	723	1283	71		1112
9743	2698		61	150	7	12	21	4	192	38	4	3459	0	5	1	18	5	93	138	995	362		105
9744	2446		325	261	1	495	3	17	159	117	74	2052	3	16	0	346	34	295	113	783	71		415
9745	3558		203	291	45	7093	47	35	368	180	97	2389	14	30	7	130	19	915	269	1002	98		1071
9746	3435		130	109	18	1609	10	18	588	90	61	2567	5	18	4	75	8	1403	279	1310	72		523
9747	3731		363	190	21	1515	34	33	1142	293	99	4441	13	47	1	83	9	1300	721	1839	208		1949
9748	3928		336	362	6	74	36	34	1855	160	155	2670	11	78	6	216	38	1370	462	1078	169		1025
9749	4168		362	134	6	97	5	137	571	203	134	3641	4	36	1	326	26	1419	536	1645	37		822
9754	2937		230	342	17	27	26	42	514	280	125	2847	4	3	0	39	13	892	329	1752	52		690
9755	4162		203	484	42	4177	58	37	2690	69	84	3982	12	41	7	84	23	1337	224	1546	314		1161
9756	2712		157	178	7	6559	8	12	480	217	48	2502	5	23	4	106	21	340	170	1063	222		244
9757	2117		79	90	14	697	50	4	337	33	49	1841	0	4	3	63	33	90	45	910	245		383
9759	2229		189	51	5	167	21	9	418	189	132	3420	1	7	4	157	36	91	0	1086	142		100
9762	2827		61	104	4	6270	8	16	1220	73	30	4457	1	11	1	57	9	268	49	641	654		250
9768	5051		211	318	18	6961	10	10	1461	62	115	3012	11	47	3	42	5	1097	264	2985	398		1642
9769	1471		139	168	5	0	8	0	666	35	23	2910	30	19	4	52	24	291	144	1452	253		245
9770	1941		306	435	6	1639	40	44	730	184	192	3193	19	30	4	179	38	395	233	2957	151		524
9771	2184		211	408	6	14137	1	15	299	214	103	3569	1	19	1	49	1	834	164	1884	247		332
9772	2761		171	247	14	430	5	15	968	220	192	3239	0	30	3	52	27	515	147	2842	227		516
9774	3556		239	408	19	82	4	29	566	164	114	4046	20	27	2	207	25	523	274	2533	278		654
9775	5187		253	165	47	354	3	45	755	82	69	4300	23	35	2	42	3	1812	295	3013	135		2693
9776	3438		223	254	3	5116	8	20	1569	100	54	3942	13	43	2	47	9	1068	174	3074	94		1622
9777	3112		244	124	12	108	8	18	547	178	122	3320	2	44	3	128	19	1053	288	1442	91		923
9778	2687		90	165	6	188	9	16	372	98	48	1938	2	27	2	95	10	561	99	943	57		487
9779	4753		317	442	23	68	2	45	456	238	87	7857	28	33	1	257	19	1578	332	3216	104		1809
9780	3230		203	276	28	4532	5	12	1151	234	95	4088	27	23	1	51	5	1437	240	1743	135		1723
9781	3844		229	485	21	261	10	41	1979	182	119	4197	28	43	3	100	18	1349	428	3814	171		1030
9782	2975		151	264	14	100	19	21	2636	81	85	4108	4	30	2	27	7	1023	208	2506	364		1006
9783	4721		306	550	18	11	15	84	1759	315	150	4802	15	90	2	67	13	3255	458	3887	96		2329
9784	2312		148	191	5	11532	4	9	365	265	52	1961	10	16	0	67	17	392	103	811	117		336
9785	3658		102	203	15	2928	9	12	524	22	28	2319	4	22	5	56	13	419	108	1545	231		2470
9786	4372		255	387	26	21	5	39	1362	177	138	4073	15	40	2	60	30	725	254	2351	74		1063
9788	2436		152	290	6	2114	16	23	1224	229	106	2971	6	19	4	75	20	366	126	3100	130		522
9789	1461		324	637	1	3500	11	21	282	421	198	6541	8	32	1	164	6	1942	363	2088	252		875
9790	1155		195	84	1	91	1	0	51	75	33	2883	4	5	1	112	7	123	93	811	150		538
9791	2019		186	495	16	25	19	15	970	336	125	5816	9	56	2	101	3	904	273	2178	155		699
9792	4681		220	335	12	45	21	22	3186	114	86	3773	18	36	4	53	15	1352	284	2925	379		1600
9793	3107		238	119	41	8229	59	14	394	144	109	2834	2	29	5	90	27	577	164	2053	229		543
9794	4132		330	437	12	179	11	28	1353	218	97	4671	14	60	2	48	3	1563	255	2982	171		1426
9795	3163		222	453	73	287	18	46	1164	227	163	4121	18	24	2	95	18	1551	581	4342	35		2391
9796	4853		295	318	12	1351	3	28	876	249	134	4906	25	33	2	60	6	1590	535	3145	150		1750
9797	847		173	345	7	20	45	14	238	237	114	2541	5	23	4	67	8	113	55	895	155		122
9798	802		93	344	2	8	28	9	158	170	68	2611	0	0	2	48	14	97	35	1016	258		29
9799	2012		172	257	27	69	5	13	323	143	45	2480	3	11	0	72	10	493	132	905	44		237
9800	2243		225	236	4	8793	8	15	199	120	111	3086	0	17	4	100	8	450	190	1901	29		216
9801	1637		91	324	4	540	4	7	132	66	32	1706	0	14	3	45	12	117	39	1019	105		79
9802	2284		275	511	3	99	4	12	583	163	97	4487	7	16	2	127	58	705	284	2619	197		666
9803	3215		146	307	20	1893	19	35	1269	159	85	4388	15	24	2	92	11	855	392	3093	352		1375
9804	3929		306	592	51	1021	11	88	2149	339	128	6236	37	30	3	108	7	1851	242	3562	115		2516
9805	1994		183	315	14	435	5	9	189	276	82	2618	4	20	0	67	19	507	136	997	59		168
9806	2909		318	458	15	86	5	0	117	185	129	3258	1	56	0	89	5	466	205	1306	49		302
9807	4310		250	568	20	2610	3	31	1562	157	105	5642	3	39	2	86	5	981	521	2763	257		1777
9808	4786		222	300	2	54	2	46	1908	135	99	4116	16	39	2	41	21	2596	477	4173	122		3377
9809	5030		264	448	51	781	6	27	1257	271	173	4426	9	26	3	101	19	1540	423	3479	113		1779
9811	4310		257	274	15	2197	4	14	547	129	57	3480	42	26	1	75	11	1765	350	4338	83		1311
9812	4086		208	220	12	933	4	29	877	227	105	3120	6	26	1	60	5	1098	296	1696	94		1067
9813	4998		223	292	5	4847	1	11	364	164	132	5956	14	37	1	110	17	711	372	2027	188		446
9814	2949		148	186	36	6721	3	23	1490	131	69	3329	7	29	2	31	3	819	368	1673	310		875
9815	4552		206	267	58	734	8	28	1149	163	89	5204	39	27	2	92	14	1217	416	2217	239		2664
9816	5028		238	503	14	1198	7	41	1031	229	174	4831	14	36	2	104	23	1695	426	3413	321		1608
9817	1255		145	66	4	3714	4	4	376	224	44	3633	2	13	2	35	7	295	313	929	93		650
9819	2330		89	10	2	555	11	0	133	23	62	2864	8	3	1	26	0	425	116	883	427		377
9821	2936		146	86	4	26	4	5	184	203	40	2375	4	8	1	105	55	879	154	1434	612		305
9823	897		71	32	3	35	10	0	20	35	20	2121	0	7	1	57	26	88	36	663	127		182
9824	2185		195	155	31	3583	3	14	837	100	96	2069	1	0	2	297	5	442	88	758	288		206
9825	2352		113	47	2	294	23	8	399	84	58	2864	0	10	1	75	4	712	227	929	120		672
9826	1835		187	93	11	1462	21	1	306	242	85	3506	2	7	1	84	1	295	139	681	219		724
9827	5914		91	10	12	32	3	9	254	51	59	2090	1	14	1	74	9	538	261	1056	27		238
9828	3106		65	18	1	226	3	1	188	28	25	2521	2	4	1	15	1	239	32	585	166		378
9829	3569		36	13	6	1932	6	1	92	28	23	2466	8	6	3	11	2	203	3	398	88		753
9830	5270		342	472	18	3912	7	30	369	261	115	2649	27	25	1	86	23	1087	80	1131	562		663
9831	1236		127	205	3	48953	11	11	39	165	68	2741	0	5	0	105	12	204	62	693	212		86
9832	2674		114	316	11	1824	10	13	352	93	37	2415	4	28	3	18	11	238	19	1387	114		1413
9833	3209		155	74	4	140	29	21	441	163	87	2772	2	9	2	31	8	371	148	1593	287		783
9834	4188		283	631	2	2144	24	70	307	326	290	5606	33	64	1	143	23	1653	1107	2086	618		377
9835	2374		158	208	7	99	6	28	493	126	60	2834	9	9	3	47	11	409	153	1261	166		717
9838	3339		71	17	6	15	3	14	98	43	23	1821	3	8	2	9	7	89	52	661	66		230
9839	1672		109	95	5	9256	11	3	217	149	106	4652	1	3	2	54	7	230	98	1075	304		440
9840	4028		103	162	4	474	18	18	480	133	87	1916	0	21	1	83	29	501	112	932	436		200
9841	3998		338	390	42	36	36	114	2548	182	223	5826	7	50	1	106	3	3037	709	3893	61		3376
9843	4051		245	84	29	34	95	44	755	298	106	4079	3	7	4	120	4	1537	375	1727	88		2979
9844	1441		219	368	1	30	33	2	103	136	134	3284	0	28	1	145	16	533	303	809	409		268
[truncated: 46,011 more rows]
