# Supplementary material for: FRUITFULL Is a Repressor of Apical Hook Opening in Arabidopsis thaliana
Source: Int J Mol Sci. 2020 Sep 3;21(17):6438. doi: 10.3390/ijms21176438 (PMC7504503; doi:10.3390/ijms21176438)
Supplement: Supplementary file 1 [file ijms-21-06438-s001.zip › supplemental files/SUP file 4 raw data kinetics.xlsx]

## Sheet: Figure 1A
20180122
	line	WT
	treatment	mock
		1	1comp		2	2comp		3	3comp		4	4comp		5	5comp		6	6comp		7	7comp		8	8comp		9	9comp		10	10comp		11	11comp		12	12comp		13	13comp		14	14comp		15	15comp			average	n
	1	7.125	172.875		6.682	173.318		5.215	174.785		9.866	170.134		8.013	171.987		7.176	172.824		9.764	170.236		7.352	172.648		9.658	170.342		5.565	174.435		7.356	172.644		9.128	170.872		5.127	174.873		5.824	174.176		8.627	171.373			172.501	15
	2	12.331	167.669		7.416	172.584		12.272	167.728		16.699	163.301		8.013	171.987		15.545	164.455		20.711	159.289		12.317	167.683		12.575	167.425		5.565	174.435		13.209	166.791		15.152	164.848		12.866	167.134		11.164	168.836		13.025	166.975			167.409	15
	3	14.209	165.791		16.534	163.466		20.583	159.417		25.096	154.904		16.44	163.56		15.772	164.228		20.711	159.289		23.11	156.89		13.169	166.831		18.307	161.693		17.467	162.533		40.426	139.574		14.019	165.981		20.818	159.182		16.95	163.05			160.426	15
	4	17.501	162.499		16.534	163.466		20.583	159.417		22.4	157.6		21.583	158.417		15.772	164.228		22.751	157.249		22.834	157.166		13.169	166.831		19	161		22.566	157.434		45.502	134.498		25.262	154.738		12.697	167.303		16.95	163.05			158.993	15
	5	18.21	161.79		14.891	165.109		23.416	156.584		22.293	157.707		18.909	161.091		15.9	164.1		29.745	150.255		18.986	161.014		23.262	156.738		20.886	159.114		21.321	158.679		31.485	148.515		25.006	154.994		12.697	167.303		18.388	161.612			158.974	15
	6	18.21	161.79		21.699	158.301		27.553	152.447		20.14	159.86		18.909	161.091		15.9	164.1		27.077	152.923		16.343	163.657		25.473	154.527		24.848	155.152		22.836	157.164		38.504	141.496		26.195	153.805		21.763	158.237		16.06	163.94			157.233	15
	7	24.852	155.148		33.552	146.448		25.323	154.677		20.922	159.078		23.758	156.242		19.94	160.06		26.961	153.039		16.427	163.573		23.506	156.494		28.457	151.543		30.179	149.821		41.892	138.108		18.004	161.996		15.192	164.808		13.346	166.654			155.846	15
	8	46.986	133.014		33.896	146.104		38.355	141.645		18.448	161.552		25.361	154.639		25.017	154.983		28.909	151.091		22.541	157.459		17.203	162.797		34.992	145.008		25.56	154.44		32.471	147.529		17.899	162.101		21.993	158.007		16.107	163.893			152.951	15
	9	94.086	85.914		33.896	146.104		35.407	144.593		26.342	153.658		23.962	156.038		26.323	153.677		23.659	156.341		25.866	154.134		19.829	160.171		25.585	154.415		29.118	150.882		47.374	132.626		18.743	161.257		19.756	160.244		26.021	153.979			148.269	15
	10	94.086	85.914		54.273	125.727		34.399	145.601		26.237	153.763		23.499	156.501		14.434	165.566		21.353	158.647		25.373	154.627		129.487	50.513		19.654	160.346		22.996	157.004		41.917	138.083		32.062	147.938		18.851	161.149		37.819	142.181			140.237	15
	11	116.583	63.417		82.667	97.333		34.399	145.601		37.465	142.535		22.644	157.356		20.089	159.911		25.696	154.304		26.269	153.731		129.942	50.058		68.361	111.639		29.381	150.619		97.535	82.465		45.47	134.53		22.338	157.662		62.613	117.387			125.237	15
	12	116.583	63.417		103.17	76.83		28.33	151.67		59.637	120.363		26.374	153.626		20.089	159.911		25.696	154.304		22.671	157.329		122.925	57.075		62.969	117.031		24.41	155.59		82.569	97.431		59.306	120.694		41.878	138.122		111.464	68.536			119.462	15
	13	123.114	56.886		113.499	66.501		96.582	83.418		70.038	109.962		27.35	152.65		20.089	159.911		111.186	68.814		15.463	164.537		138.013	41.987		66.746	113.254		22.157	157.843		84.992	95.008		70.519	109.481		41.878	138.122		122.754	57.246			105.041	15
	14	140.582	39.418		136.299	43.701		119.21	60.79		124.007	55.993		80.877	99.123		30.722	149.278		126.158	53.842		18.185	161.815		160.463	19.537		66.065	113.935		27.761	152.239		101.01	78.99		94.807	85.193		67.532	112.468		137.755	42.245			84.5711	15
	15	140.582	39.418		136.299	43.701		148.334	31.666		152.438	27.562		114.609	65.391		50.599	129.401		134.091	45.909		25.547	154.453		150.068	29.932		76.387	103.613		18.337	161.663		174.081	5.919		111.695	68.305		56.171	123.829		141.139	38.861			71.3082	15
	16	140.582	39.418		143.531	36.469		165.81	14.19		166.608	13.392		146.808	33.192		48.033	131.967		142.125	37.875		48.211	131.789		150.068	29.932		90	90		14.036	165.964		174.56	5.44		121.872	58.128		56.171	123.829		151.281	28.719			62.6869	15
	17	140.582	39.418		143.531	36.469		165.81	14.19		166.608	13.392		160.536	19.464		86.032	93.968		158.524	21.476		77.158	102.842		161.296	18.704		109.596	70.404		22.677	157.323		174.56	5.44		135.21	44.79		66.264	113.736		149.859	30.141			52.1171	15
	18	153.18	26.82		140.44	39.56		130.572	49.428		172.513	7.487		160.536	19.464		117.691	62.309		158.524	21.476		115.035	64.965		152.592	27.408		138.814	41.186		22.498	157.502		166.355	13.645		154.757	25.243		75.673	104.327		162.047	17.953			45.2515	15
	19	153.18	26.82		145.555	34.445		135.128	44.872		172.513	7.487		170.058	9.942		153.309	26.691		158.524	21.476		139.399	40.601		157.196	22.804		151.991	28.009		39.388	140.612		165.211	14.789		154.757	25.243		103.587	76.413		167.134	12.866			35.538	15
	20	153.18	26.82		155.283	24.717		149.013	30.987		172.513	7.487		173.387	6.613		152.048	27.952		158.524	21.476		139.399	40.601		150.322	29.678		155.095	24.905		63.255	116.745		165.211	14.789		161.445	18.555		125.838	54.162		169.261	10.739			30.4151	15
	21	163.236	16.764		155.283	24.717		149.013	30.987		172.513	7.487		173.387	6.613		155.935	24.065		175.715	4.285		130.03	49.97		152.103	27.897		158.275	21.725		92.49	87.51		164.055	15.945		162.834	17.166		145.192	34.808		169.261	10.739			25.3785	15
	22	163.236	16.764		155.283	24.717		179.415	0.585		177.722	2.278		173.387	6.613		161.742	18.258		175.715	4.285		135.981	44.019		148.799	31.201		174.065	5.935		102.178	77.822		164.055	15.945		161.203	18.797		150.381	29.619		169.261	10.739			20.5051	15
	23	163.236	16.764		158.599	21.401		152.381	27.619		177.722	2.278		173.387	6.613		147.66	32.34		175.715	4.285		153.819	26.181		151.504	28.496		174.065	5.935		133.406	46.594		172.628	7.372		163.036	16.964		151.837	28.163		162.194	17.806			19.2541	15
	24	170.022	9.978		158.599	21.401		153.979	26.021		172.298	7.702		173.387	6.613		147.66	32.34		175.715	4.285		178.866	1.134		144.769	35.231		174.065	5.935		159.54	20.46		172.628	7.372		154.942	25.058		166.817	13.183		172.768	7.232			14.9297	15
	25	170.022	9.978		175.691	4.309		154.819	25.181		168.69	11.31		164.96	15.04		162.699	17.301		167.505	12.495		161.642	18.358		152.924	27.076		175.105	4.895		159.069	20.931		172.628	7.372		153.861	26.139		166.817	13.183		171.461	8.539			14.8071	15
	26	173.128	6.872		175.691	4.309		159.717	20.283		168.212	11.788		164.96	15.04		162.699	17.301		177.274	2.726		161.642	18.358		157.4	22.6		170.209	9.791		158.653	21.347		172.628	7.372		175.129	4.871		178.493	1.507		173.807	6.193			11.3572	15
	27	173.128	6.872		163.985	16.015		159.717	20.283		158.018	21.982		171.384	8.616		167.471	12.529		177.274	2.726		161.642	18.358		156.702	23.298		169.891	10.109		164.975	15.025		176.243	3.757		161.996	18.004		178.493	1.507		159.769	20.231			13.2875	15
	28	173.128	6.872		166.667	13.333		177.574	2.426		163.436	16.564		172.193	7.807		167.471	12.529		177.274	2.726		161.642	18.358		161.511	18.489		160.253	19.747		166.329	13.671		176.243	3.757		169.862	10.138		178.493	1.507		174.328	5.672			10.2397	15
	29	173.128	6.872		166.667	13.333		177.574	2.426		163.436	16.564		176.046	3.954		167.471	12.529		178.445	1.555		177.663	2.337		168.013	11.987		165.029	14.971		169.475	10.525		178.951	1.049		169.862	10.138		175.954	4.046		173.552	6.448			7.9156	15
	30	173.128	6.872		175.048	4.952		177.574	2.426		163.436	16.564		176.046	3.954		167.471	12.529		178.445	1.555		177.819	2.181		168.013	11.987		165.029	14.971		173.055	6.945		179.34	0.66		174.094	5.906		179.459	0.541		175.244	4.756			6.45327	15
		173.128			169.911			177.574			178.971			172.784			169.922			178.445			171.254			168.013			164.422			173.055			178.93			174.094			179.459			175.244
	line	WT
	treatment	500 nM IAA
		1	1comp		2	2comp		3	3comp		4	4comp		5	5comp		6	6comp		7	7comp		8	8comp		9	9comp		10	10comp		11	11comp		12	12comp		13	13comp		14	14comp		15	15comp			average	n
	1	7.326	172.674		7.803	172.197		2.904	177.096		4.24	175.76		5.194	174.806		7.765	172.235		4.229	175.771		7.125	172.875		6.271	173.729		3.945	176.055		6.683	173.317		5.507	174.493		29.967	150.033		7.282	172.718		4.712	175.288			172.603	15
	2	7.326	172.674		7.803	172.197		14.456	165.544		7.886	172.114		5.744	174.256		8.726	171.274		13.648	166.352		11.619	168.381		8.075	171.925		6	174		13.736	166.264		15.168	164.832		29.967	150.033		14.729	165.271		7.125	172.875			168.533	15
	3	11.31	168.69		9.802	170.198		17.233	162.767		12.121	167.879		9.525	170.475		15.477	164.523		13.427	166.573		11.619	168.381		10.008	169.992		7.292	172.708		17.99	162.01		21.187	158.813		36.292	143.708		18.322	161.678		12.298	167.702			165.073	15
	4	11.31	168.69		12.907	167.093		21.111	158.889		12.121	167.879		19.923	160.077		27.051	152.949		12.787	167.213		15.709	164.291		10.008	169.992		14.438	165.562		23.312	156.688		13.717	166.283		41.673	138.327		22.011	157.989		16.921	163.079			161.667	15
	5	15	165		12.907	167.093		28.942	151.058		18.97	161.03		19.923	160.077		27.051	152.949		24.409	155.591		20.051	159.949		18.289	161.711		14.438	165.562		23.312	156.688		10.934	169.066		33.69	146.31		22.011	157.989		20.31	159.69			159.318	15
	6	20.225	159.775		21.278	158.722		14.138	165.862		18.97	161.03		18.032	161.968		20.384	159.616		22.414	157.586		27.784	152.216		18.686	161.314		20.47	159.53		21.991	158.009		10.587	169.413		27.207	152.793		25.278	154.722		21.224	158.776			159.422	15
	7	24.37	155.63		21.275	158.725		14.863	165.137		14.584	165.416		21.501	158.499		20.313	159.687		22.035	157.965		22.154	157.846		18.327	161.673		20.736	159.264		26.565	153.435		12.588	167.412		19.908	160.092		25.974	154.026		22.433	157.567			159.492	15
	8	32.137	147.863		20.347	159.653		24.884	155.116		13.188	166.812		23.431	156.569		20.313	159.687		20.472	159.528		36.432	143.568		18.327	161.673		20.736	159.264		22.223	157.777		19.937	160.063		25.04	154.96		25.511	154.489		39.783	140.217			155.816	15
	9	17.356	162.644		22.177	157.823		19.654	160.346		22.921	157.079		23.431	156.569		30.187	149.813		26.104	153.896		36.432	143.568		35.835	144.165		35.459	144.541		23.952	156.048		14.327	165.673		34.438	145.562		25.511	154.489		41.944	138.056			152.685	15
	10	15.775	164.225		35.156	144.844		55.039	124.961		21.801	158.199		20.935	159.065		15.593	164.407		19.214	160.786		29.208	150.792		56.882	123.118		35.459	144.541		23.952	156.048		16.314	163.686		37.825	142.175		21.14	158.86		39.596	140.404			150.407	15
	11	19.523	160.477		36.8	143.2		63.132	116.868		57.529	122.471		20.102	159.898		28.36	151.64		16.374	163.626		37.235	142.765		153.435	26.565		31.675	148.325		24.957	155.043		30.487	149.513		37.825	142.175		22.834	157.166		34.292	145.708			139.029	15
	12	18.682	161.318		41.903	138.097		56.328	123.672		137.897	42.103		25.824	154.176		28.36	151.64		22.945	157.055		25.964	154.036		157.495	22.505		32.905	147.095		25.414	154.586		30.703	149.297		45	135		19.654	160.346		16.928	163.072			134.267	15
	13	18.682	161.318		72.051	107.949		63.505	116.495		137.897	42.103		97.329	82.671		33.734	146.266		48.697	131.303		36.764	143.236		166.342	13.658		29.172	150.828		31.916	148.084		29.379	150.621		43.24	136.76		21.427	158.573		19.312	160.688			123.37	15
	14	27.081	152.919		78.389	101.611		56.233	123.767		120.379	59.621		97.329	82.671		116.288	63.712		78.015	101.985		61.47	118.53		171.983	8.017		39.65	140.35		46.399	133.601		38.63	141.37		50.434	129.566		23.199	156.801		19.312	160.688			111.681	15
	15	27.28	152.72		97.028	82.972		56.233	123.767		130.05	49.95		80.903	99.097		122.905	57.095		121.818	58.182		80.288	99.712		166.529	13.471		49.445	130.555		57.736	122.264		43.315	136.685		32.782	147.218		33.166	146.834		18.435	161.565			105.472	15
	16	31.516	148.484		97.028	82.972		70.593	109.407		130.05	49.95		74.41	105.59		122.905	57.095		150.676	29.324		86.913	93.087		163.224	16.776		67.169	112.831		71.604	108.396		53.483	126.517		28.474	151.526		75.518	104.482		24.77	155.23			96.7778	15
	17	31.516	148.484		102.875	77.125		72.076	107.924		158.358	21.642		74.092	105.908		119.12	60.88		152.595	27.405		109.665	70.335		159.493	20.507		70.196	109.804		106.21	73.79		70.531	109.469		40.601	139.399		104.2	75.8		25.097	154.903			86.8917	15
	18	55.679	124.321		122.276	57.724		80.665	99.335		158.358	21.642		98.428	81.572		119.12	60.88		163.223	16.777		112.879	67.121		159.155	20.845		92.796	87.204		111.81	68.19		86.695	93.305		123.601	56.399		115.346	64.654		33.677	146.323			71.0861	15
	19	60.255	119.745		122.276	57.724		80.665	99.335		158.358	21.642		101.643	78.357		163.836	16.164		172.81	7.19		124.199	55.801		147.272	32.728		121.394	58.606		107.78	72.22		100.036	79.964		144.795	35.205		122.576	57.424		88.212	91.788			58.9262	15
	20	62.175	117.825		122.276	57.724		80.665	99.335		158.358	21.642		101.643	78.357		163.836	16.164		172.81	7.19		134.556	45.444		152.672	27.328		132.397	47.603		107.78	72.22		103.835	76.165		144.795	35.205		131.148	48.852		88.212	91.788			56.1895	15
	21	85.581	94.419		124.896	55.104		118.356	61.644		162.028	17.972		110.446	69.554		163.836	16.164		167.969	12.031		134.556	45.444		163.464	16.536		132.397	47.603		153.617	26.383		145.84	34.16		147.902	32.098		139.173	40.827		133.043	46.957			41.1264	15
	22	110.34	69.66		145.62	34.38		127.35	52.65		169.598	10.402		115.66	64.34		163.836	16.164		178.533	1.467		176.153	3.847		168.861	11.139		139.299	40.701		160.1	19.9		159.462	20.538		147.902	32.098		154.597	25.403		142.175	37.825			29.3676	15
	23	131.208	48.792		171.722	8.278		140.767	39.233		169.598	10.402		115.66	64.34		168.99	11.01		175.35	4.65		173.37	6.63		170.772	9.228		159.508	20.492		160.1	19.9		169.16	10.84		162.656	17.344		154.597	25.403		142.175	37.825			22.2911	15
	24	154.812	25.188		175.29	4.71		174.586	5.414		171.87	8.13		115.66	64.34		168.99	11.01		175.959	4.041		173.37	6.63		166.946	13.054		176.444	3.556		177.856	2.144		169.16	10.84		162.656	17.344		163.934	16.066		151.858	28.142			14.7073	15
	25	168.188	11.812		175.29	4.71		168.413	11.587		174.094	5.906		151.516	28.484		168.99	11.01		176.106	3.894		173.37	6.63		166.946	13.054		178.995	1.005		177.856	2.144		163.151	16.849		162.656	17.344		172.467	7.533		151.858	28.142			11.3403	15
	26	172.131	7.869		175.29	4.71		179.7	0.3		174.884	5.116		158.48	21.52		171.729	8.271		173.915	6.085		173.37	6.63		160.601	19.399		178.995	1.005		177.067	2.933		179.254	0.746		171.344	8.656		172.875	7.125		151.858	28.142			8.56713	15
	27	176.956	3.044		175.29	4.71		168.248	11.752		174.92	5.08		158.48	21.52		177.86	2.14		172.563	7.437		178.666	1.334		160.082	19.918		178.995	1.005		177.118	2.882		171.141	8.859		171.344	8.656		173.418	6.582		157.302	22.698			8.5078	15
	28	173.373	6.627		175.29	4.71		171.113	8.887		174.92	5.08		152.761	27.239		177.86	2.14		172.563	7.437		179.149	0.851		160.082	19.918		178.995	1.005		177.118	2.882		172.836	7.164		176.516	3.484		170.362	9.638		166.699	13.301			8.0242	15
	29	173.972	6.028		175.29	4.71		171.113	8.887		174.92	5.08		160.222	19.778		177.86	2.14		176.962	3.038		177.245	2.755		163.749	16.251		178.995	1.005		177.118	2.882		172.879	7.121		176.516	3.484		171.347	8.653		166.699	13.301			7.00753	15
	30	173.972	6.028		175.29	4.71		169.977	10.023		174.92	5.08		163.96	16.04		178.829	1.171		177.01	2.99		178.699	1.301		163.526	16.474		178.995	1.005		177.246	2.754		172.879	7.121		176.675	3.325		171.347	8.653		166.699	13.301			6.66507	15
		173.972			175.29			169.977			174.92			166.458			176.278			174.487			178.699			169.144			178.995			173.083			172.879			176.675			169.517			166.699
20180202
	line	WT
	treatment	mock
		1	1comp		2	2comp		3	3comp		4	4comp		5	5comp		6	6comp		7	7comp		8	8comp		9	9comp		10	10comp		11	11comp		12	12comp		13	13comp		14	14comp		15	15comp			average	n
	1	0.293	179.707		0.19	179.81		0.372	179.628		0.922	179.078		10.224	169.776		8.366	171.634		0.628	179.372		1.679	178.321		1.779	178.221		1.736	178.264		1.082	178.918		0	180		0.845	179.155		1.495	178.505		0.246	179.754			178.01	15
	2	0.293	179.707		0.19	179.81		0.372	179.628		15.103	164.897		15.213	164.787		8.366	171.634		0.628	179.372		12.103	167.897		1.779	178.221		1.736	178.264		1.082	178.918		0	180		0.845	179.155		1.495	178.505		0.246	179.754			176.037	15
	3	0.293	179.707		46.005	133.995		0.372	179.628		22.218	157.782		23.875	156.125		22.302	157.698		0.308	179.692		32.3	147.7		1.779	178.221		7.839	172.161		40.313	139.687		12.104	167.896		0.845	179.155		1.495	178.505		0.246	179.754			165.847	15
	4	0.293	179.707		68.225	111.775		18.435	161.565		21.491	158.509		21.246	158.754		27.255	152.745		0.308	179.692		36.262	143.738		1.779	178.221		7.839	172.161		38.58	141.42		0.561	179.439		0.845	179.155		1.495	178.505		0.246	179.754			163.676	15
	5	0.293	179.707		68.225	111.775		18.435	161.565		22.784	157.216		22.393	157.607		14.605	165.395		0.308	179.692		47.726	132.274		1.779	178.221		59.512	120.488		38.58	141.42		0.561	179.439		14.109	165.891		0	180		0.246	179.754			159.363	15
	6	18.168	161.832		90	90		10.939	169.061		54.332	125.668		30.647	149.353		14.605	165.395		1.12	178.88		46.182	133.818		1.779	178.221		59.512	120.488		34.448	145.552		35.49	144.51		14.109	165.891		0	180		0.246	179.754			152.562	15
	7	27.87	152.13		106.533	73.467		1.501	178.499		54.146	125.854		36.602	143.398		19.199	160.801		24.379	155.621		86.668	93.332		47.57	132.43		59.512	120.488		35.425	144.575		35.49	144.51		29.291	150.709		0	180		0.246	179.754			142.371	15
	8	45	135		106.533	73.467		28.113	151.887		56.041	123.959		55.57	124.43		44.116	135.884		25.141	154.859		97.589	82.411		47.57	132.43		59.512	120.488		54.418	125.582		35.49	144.51		45.253	134.747		0	180		0.246	179.754			133.294	15
	9	62.292	117.708		92.367	87.633		21.801	158.199		56.041	123.959		82.03	97.97		48.617	131.383		25.141	154.859		124.753	55.247		47.57	132.43		59.512	120.488		79.599	100.401		52.944	127.056		45.253	134.747		0.306	179.694		49.788	130.212			123.466	15
	10	87.797	92.203		132.852	47.148		77.442	102.558		67.692	112.308		152.787	27.213		51.179	128.821		25.141	154.859		140.668	39.332		47.57	132.43		59.512	120.488		115.311	64.689		52.944	127.056		45.924	134.076		29.699	150.301		64.867	115.133			103.241	15
	11	103.077	76.923		118.033	61.967		131.82	48.18		102.529	77.471		140.304	39.696		58.671	121.329		28.686	151.314		156.822	23.178		74.643	105.357		79.099	100.901		137.148	42.852		99.03	80.97		45.924	134.076		29.699	150.301		105.32	74.68			85.9463	15
	12	129.094	50.906		153.367	26.633		142.521	37.479		124.81	55.19		168.797	11.203		69.493	110.507		28.686	151.314		167.281	12.719		90.886	89.114		105.836	74.164		151.074	28.926		118.103	61.897		45.924	134.076		50.397	129.603		105.32	74.68			69.8941	15
	13	129.094	50.906		170.838	9.162		159.05	20.95		132.03	47.97		158.962	21.038		84.509	95.491		63.435	116.565		173.748	6.252		90.886	89.114		105.836	74.164		155.191	24.809		140.716	39.284		77.273	102.727		96.364	83.636		150.422	29.578			54.1097	15
	14	137.191	42.809		173.587	6.413		176.216	3.784		132.03	47.97		142.49	37.51		94.324	85.676		78.135	101.865		173.748	6.252		90.886	89.114		105.836	74.164		165.089	14.911		176.474	3.526		77.273	102.727		117.255	62.745		150.422	29.578			47.2696	15
	15	137.191	42.809		174.253	5.747		176.216	3.784		165.66	14.34		176.427	3.573		101.821	78.179		82.083	97.917		175.076	4.924		110.813	69.187		105.836	74.164		165.089	14.911		172.875	7.125		85.93	94.07		117.255	62.745		150.422	29.578			40.2035	15
	16	151.645	28.355		174.253	5.747		176.216	3.784		165.66	14.34		176.427	3.573		125.398	54.602		82.083	97.917		175.076	4.924		110.813	69.187		116.288	63.712		179.36	0.64		172.875	7.125		85.93	94.07		110.842	69.158		176.354	3.646			34.7187	15
	17	168.723	11.277		174.56	5.44		176.216	3.784		179.423	0.577		176.427	3.573		133.958	46.042		83.916	96.084		175.076	4.924		125.801	54.199		116.288	63.712		179.36	0.64		176.972	3.028		95.771	84.229		110.842	69.158		176.354	3.646			30.0209	15
	18	178.986	1.014		174.56	5.44		176.216	3.784		179.423	0.577		176.427	3.573		133.958	46.042		98.279	81.721		175.076	4.924		125.801	54.199		143.295	36.705		179.36	0.64		176.972	3.028		107.606	72.394		157.825	22.175		176.354	3.646			22.6575	15
	19	178.986	1.014		174.56	5.44		176.216	3.784		179.423	0.577		176.427	3.573		135.666	44.334		116.708	63.292		175.076	4.924		179.636	0.364		143.295	36.705		179.36	0.64		176.972	3.028		133.556	46.444		157.825	22.175		176.354	3.646			15.996	15
	20	178.986	1.014		174.56	5.44		176.216	3.784		179.423	0.577		176.427	3.573		136.931	43.069		155.556	24.444		175.076	4.924		165.936	14.064		171.18	8.82		179.36	0.64		176.972	3.028		133.556	46.444		170.768	9.232		176.354	3.646			11.5133	15
	21	178.986	1.014		174.56	5.44		176.216	3.784		179.423	0.577		176.427	3.573		136.931	43.069		167.925	12.075		175.076	4.924		179.448	0.552		171.18	8.82		179.36	0.64		176.972	3.028		130.384	49.616		170.768	9.232		176.354	3.646			9.99933	15
	22	178.986	1.014		174.56	5.44		176.216	3.784		179.423	0.577		176.427	3.573		153.341	26.659		153.931	26.069		175.076	4.924		179.448	0.552		171.18	8.82		179.36	0.64		176.972	3.028		127.676	52.324		174.526	5.474		176.354	3.646			9.76827	15
	23	178.986	1.014		174.56	5.44		176.216	3.784		179.423	0.577		176.427	3.573		153.341	26.659		178.176	1.824		175.076	4.924		179.448	0.552		178.205	1.795		179.36	0.64		176.972	3.028		125.889	54.111		174.526	5.474		176.354	3.646			7.80273	15
	24	178.986	1.014		174.56	5.44		176.216	3.784		179.423	0.577		176.427	3.573		160.56	19.44		169.802	10.198		175.076	4.924		179.448	0.552		178.205	1.795		179.36	0.64		176.972	3.028		165.942	14.058		174.526	5.474		176.354	3.646			5.20953	15
	25	178.986	1.014		174.56	5.44		176.216	3.784		179.423	0.577		176.427	3.573		160.56	19.44		175.22	4.78		175.076	4.924		179.448	0.552		178.205	1.795		179.36	0.64		176.972	3.028		165.942	14.058		174.526	5.474		176.354	3.646			4.84833	15
	26	178.986	1.014		174.56	5.44		176.216	3.784		179.423	0.577		176.427	3.573		160.56	19.44		175.22	4.78		175.076	4.924		179.448	0.552		178.205	1.795		179.36	0.64		176.972	3.028		165.942	14.058		169.766	10.234		176.354	3.646			5.16567	15
	27	178.986	1.014		174.56	5.44		176.216	3.784		179.423	0.577		176.427	3.573		171.783	8.217		178.132	1.868		175.076	4.924		179.448	0.552		178.205	1.795		179.36	0.64		176.972	3.028		165.942	14.058		176.502	3.498		176.354	3.646			3.77427	15
	28	178.986	1.014		174.56	5.44		176.216	3.784		179.423	0.577		176.427	3.573		171.783	8.217		178.132	1.868		175.076	4.924		179.448	0.552		178.205	1.795		179.36	0.64		176.972	3.028		177.611	2.389		176.502	3.498		176.354	3.646			2.99633	15
	29	178.986	1.014		174.56	5.44		176.216	3.784		179.423	0.577		176.427	3.573		169.579	10.421		178.132	1.868		175.076	4.924		179.448	0.552		178.205	1.795		179.36	0.64		176.972	3.028		177.611	2.389		176.502	3.498		176.354	3.646			3.14327	15
	30	178.986	1.014		174.56	5.44		176.216	3.784		179.423	0.577		176.427	3.573		169.579	10.421		178.132	1.868		175.076	4.924		179.448	0.552		178.205	1.795		179.36	0.64		176.972	3.028		177.611	2.389		176.502	3.498		176.354	3.646			3.14327	15
	line	WT
	treatment	500nM IAA
		1	1comp		2	2comp		3	3comp		4	4comp		5	5comp		6	6comp		7	7comp		8	8comp		9	9comp		10	10comp		11	11comp		12	12comp		13	13comp		14	14comp		15	15comp			average	n
	1	0.63	179.37		2.144	177.856		0.481	179.519		11.414	168.586		0.666	179.334		1.156	178.844		0.843	179.157		0.385	179.615		1.273	178.727		1.682	178.318		0	180		2.624	177.376		3.457	176.543		3.602	176.398		2.543	177.457			177.807	15
	2	0.63	179.37		2.144	177.856		0.481	179.519		11.414	168.586		0.666	179.334		1.156	178.844		0.843	179.157		0.385	179.615		20.158	159.842		9.162	170.838		8.13	171.87		2.624	177.376		17.928	162.072		5.372	174.628		2.543	177.457			174.424	15
	3	9.031	170.969		2.144	177.856		19.57	160.43		11.414	168.586		0.666	179.334		1.351	178.649		0.843	179.157		0.385	179.615		53.213	126.787		8.678	171.322		32.646	147.354		2.624	177.376		17.928	162.072		5.372	174.628		2.543	177.457			168.773	15
	4	0.333	179.667		2.144	177.856		19.57	160.43		0.966	179.034		0.666	179.334		1.351	178.649		0.843	179.157		0.385	179.615		59.036	120.964		16.981	163.019		32.646	147.354		5.247	174.753		26.377	153.623		18.193	161.807		2.543	177.457			167.515	15
	5	40.601	139.399		2.144	177.856		19.57	160.43		0.966	179.034		0.666	179.334		0.354	179.646		0.172	179.828		0.385	179.615		90.815	89.185		0.266	179.734		9.411	170.589		5.247	174.753		29.827	150.173		5.123	174.877		2.543	177.457			166.127	15
	6	55.061	124.939		2.144	177.856		19.57	160.43		0.966	179.034		0.666	179.334		0.354	179.646		0.172	179.828		1.672	178.328		57.731	122.269		15.927	164.073		9.411	170.589		5.247	174.753		23.703	156.297		5.123	174.877		3.18	176.82			166.605	15
	7	52.197	127.803		2.144	177.856		0.172	179.828		0.966	179.034		0.666	179.334		1.568	178.432		18.435	161.565		1.672	178.328		73.674	106.326		15.927	164.073		0.13	179.87		5.247	174.753		21.675	158.325		4.931	175.069		3.18	176.82			166.494	15
	8	85.648	94.352		2.144	177.856		19.879	160.121		21.954	158.046		1.109	178.891		1.568	178.432		64.684	115.316		1.672	178.328		60.912	119.088		0.422	179.578		0.13	179.87		1.792	178.208		31.535	148.465		4.931	175.069		3.18	176.82			159.896	15
	9	95.886	84.114		66.209	113.791		52.405	127.595		21.954	158.046		1.109	178.891		1.568	178.432		79.495	100.505		1.672	178.328		52.431	127.569		0.422	179.578		27.803	152.197		1.792	178.208		26.612	153.388		4.931	175.069		1.909	178.091			150.92	15
	10	84.614	95.386		84.644	95.356		73.413	106.587		48.681	131.319		0.128	179.872		1.568	178.432		79.443	100.557		1.672	178.328		75.137	104.863		0.422	179.578		26.084	153.916		17.123	162.877		60.522	119.478		2.893	177.107		1.909	178.091			142.783	15
	11	128.264	51.736		92.876	87.124		109.782	70.218		48.681	131.319		0.128	179.872		1.568	178.432		79.443	100.557		1.672	178.328		61.296	118.704		0.422	179.578		34.509	145.491		32.417	147.583		95.076	84.924		4.549	175.451		1.909	178.091			133.827	15
	12	108.978	71.022		92.876	87.124		123.945	56.055		59.49	120.51		1.229	178.771		58.354	121.646		91.627	88.373		1.672	178.328		62.241	117.759		53.842	126.158		24.341	155.659		43.779	136.221		117.286	62.714		36.983	143.017		39.622	140.378			118.916	15
	13	108.622	71.378		92.876	87.124		157.176	22.824		66.431	113.569		33.721	146.279		71.565	108.435		91.627	88.373		1.672	178.328		61.39	118.61		53.842	126.158		28.142	151.858		53.292	126.708		122.036	57.964		35.499	144.501		39.622	140.378			112.166	15
	14	123.591	56.409		92.876	87.124		154.715	25.285		83.958	96.042		49.57	130.43		95.559	84.441		125.134	54.866		21.434	158.566		62.362	117.638		101.572	78.428		30.339	149.661		88.063	91.937		172.867	7.133		63.638	116.362		39.622	140.378			92.98	15
	15	121.269	58.731		118.452	61.548		154.715	25.285		121.969	58.031		57.411	122.589		110.043	69.957		114.829	65.171		21.434	158.566		148.493	31.507		131.66	48.34		45.116	134.884		96.246	83.754		172.867	7.133		77.464	102.536		59.907	120.093			76.5417	15
	16	121.269	58.731		118.452	61.548		179.556	0.444		121.969	58.031		93.366	86.634		110.043	69.957		131.562	48.438		21.434	158.566		172.804	7.196		160.297	19.703		55.62	124.38		134.252	45.748		172.867	7.133		79.396	100.604		68.997	111.003			63.8744	15
	17	121.269	58.731		101.05	78.95		179.556	0.444		109.767	70.233		93.366	86.634		117.688	62.312		179.689	0.311		50.108	129.892		162.887	17.113		171.182	8.818		83.66	96.34		143.707	36.293		172.867	7.133		107.599	72.401		82.444	97.556			54.8774	15
	18	121.269	58.731		121.866	58.134		179.556	0.444		109.767	70.233		93.366	86.634		117.688	62.312		164.578	15.422		50.108	129.892		162.887	17.113		175.236	4.764		112.166	67.834		143.707	36.293		172.867	7.133		109.358	70.642		75.228	104.772			52.6902	15
	19	126.87	53.13		131.622	48.378		179.556	0.444		130.807	49.193		93.366	86.634		117.688	62.312		178.262	1.738		50.108	129.892		162.887	17.113		175.236	4.764		139.411	40.589		143.707	36.293		172.867	7.133		122.141	57.859		107.526	72.474			44.5297	15
	20	126.87	53.13		131.622	48.378		179.556	0.444		130.807	49.193		177.51	2.49		136.709	43.291		178.262	1.738		78.814	101.186		178.077	1.923		175.236	4.764		164.678	15.322		178.117	1.883		172.867	7.133		124.967	55.033		98.114	81.886			31.1863	15
	21	171.919	8.081		144.055	35.945		179.556	0.444		151.562	28.438		154.314	25.686		136.709	43.291		178.262	1.738		101.214	78.786		178.077	1.923		175.236	4.764		164.678	15.322		174.897	5.103		172.867	7.133		179.77	0.23		134.582	45.418			20.1535	15
	22	171.919	8.081		144.055	35.945		179.556	0.444		151.562	28.438		172.222	7.778		153.917	26.083		178.262	1.738		107.698	72.302		178.077	1.923		175.236	4.764		179.687	0.313		174.897	5.103		172.867	7.133		179.77	0.23		119.329	60.671			17.3964	15
	23	178.941	1.059		144.055	35.945		179.556	0.444		178.148	1.852		172.222	7.778		153.917	26.083		178.262	1.738		107.698	72.302		178.077	1.923		175.236	4.764		179.687	0.313		174.897	5.103		172.867	7.133		179.77	0.23		114.444	65.556			15.4815	15
	24	178.941	1.059		144.055	35.945		179.556	0.444		178.148	1.852		172.222	7.778		155.69	24.31		178.262	1.738		107.698	72.302		178.077	1.923		175.236	4.764		179.687	0.313		174.897	5.103		172.867	7.133		179.77	0.23		158.749	21.251			12.4097	15
	25	178.941	1.059		144.055	35.945		179.556	0.444		178.148	1.852		172.222	7.778		155.69	24.31		178.262	1.738		107.698	72.302		178.077	1.923		175.236	4.764		179.687	0.313		174.897	5.103		172.867	7.133		179.77	0.23		149.796	30.204			13.0065	15
	26	178.941	1.059		144.055	35.945		179.556	0.444		169.938	10.062		172.222	7.778		155.538	24.462		178.262	1.738		134.848	45.152		178.077	1.923		175.236	4.764		179.687	0.313		174.897	5.103		172.867	7.133		179.77	0.23		158.847	21.153			11.1506	15
	27	178.941	1.059		179.253	0.747		179.556	0.444		177.13	2.87		172.222	7.778		155.538	24.462		178.262	1.738		155.772	24.228		178.077	1.923		175.236	4.764		179.687	0.313		174.897	5.103		172.867	7.133		179.77	0.23		136.269	43.731			8.43487	15
	28	178.941	1.059		179.253	0.747		179.556	0.444		177.13	2.87		172.222	7.778		176.82	3.18		178.262	1.738		155.772	24.228		178.077	1.923		175.236	4.764		179.687	0.313		174.897	5.103		172.867	7.133		179.77	0.23		136.269	43.731			7.01607	15
	29	178.941	1.059		179.253	0.747		179.556	0.444		177.13	2.87		172.222	7.778		176.82	3.18		178.262	1.738		162.875	17.125		178.077	1.923		175.236	4.764		179.687	0.313		174.897	5.103		172.867	7.133		179.77	0.23		158.258	21.742			5.0766	15
	30	178.941	1.059		179.253	0.747		179.556	0.444		177.13	2.87		172.222	7.778		176.82	3.18		178.262	1.738		162.875	17.125		178.077	1.923		175.236	4.764		179.687	0.313		174.897	5.103		172.867	7.133		179.77	0.23		158.258	21.742			5.0766	15
20171016
only the complements are given	WT
	mock														average	n	stERROR
	1	166.812	175.03	157.38	177.805	167.471	176.219	178.379	177.556	174.605	175.236	177.839			173.121	11	1.9793
	2	166.812	171.18	152.278	167.386	167.471	165.256	178.379	177.556	168.69	165.141	167.676			167.984	11	2.07733
	3	170.492	174.806	141.986	155.772	171.87	150.313	165.53	162.966	160.017	150.396	153.014			159.742	11	3.14224
	4	177.034	150.255	120.919	166.724	158.405	155.019	165.53	151.139	145.739	142.172	143.13			152.37	11	4.53218
	5	177.034	150.255	93.434	166.724	158.405	144.723	154.983	141.938	145.739	142.172	116.253			144.696	11	6.94622
	6	177.034	179.91	40.389	167.905	158.405	82.326	126.769	141.938	95.155	142.172	99.728			128.339	11	13.3659
	7	177.034	45.69	3.9	167.905	158.405	6.973	118.61	121.961	42.997	142.172	84.806			97.3139	11	19.2598
	8	177.034	7.125	3.9	146.669	140.528	9.851	71.748	94.296	8.499	160.598	84.551			82.2545	11	20.314
	9	177.034	5.266	3.9	123.17	98.673	9.851	55.076	77.894	5.631	127.825	92.261			70.5983	11	17.9765
	10	177.034	5.266	3.9	94.684	78.949	9.851	33.849	12.55	5.631	89.474	79.509			53.6997	11	16.6845
	11	156.801	5.266	3.9	61.228	35.91	9.851	26.862	0.569	5.631	67.635	90			42.1503	11	14.6629
	12	131.878	5.266	3.9	21.448	35.91	9.851	5.247	0.569	5.631	43.506	82.959			31.4695	11	12.5126
	13	101.31	5.266	3.9	8.9	10.449	9.851	5.247	0.569	5.631	29.115	84.6			24.0762	11	10.5659
	14	69.748	5.266	3.9	8.9	10.449	9.851	5.247	0.569	5.631	11.31	57.826			17.1543	11	7.06304
	15	54.071	5.266	3.9	8.9	10.449	9.851	5.247	0.569	5.631	11.31	45.112			14.5733	11	5.34146
	16	34.567	5.266	3.9	8.9	10.449	9.851	5.247	0.569	5.631	5.436	45.112			12.2662	11	4.25591
	17	0.49	5.266	3.9	8.9	10.449	9.851	5.247	0.569	5.631	5.436	45.112			9.16827	11	3.72728
	18	0.49	5.266	3.9	8.9	10.449	9.851	5.247	0.569	5.631	5.436	0.151			5.08091	11	1.1028
	19	0.49	5.266	3.9	8.9	10.449	9.851	5.247	0.569	5.631	5.436	0.151			5.08091	11	1.1028
	20	0.49	5.266	3.9	8.9	10.449	9.851	5.247	0.569	5.631	5.436	0.151			5.08091	11	1.1028
	21	0.49	5.266	3.9	8.9	10.449	9.851	5.247	0.569	5.631	5.436	0.151			5.08091	11	1.1028
	22	0.49	5.266	3.9	8.9	10.449	9.851	5.247	0.569	5.631	5.436	0.151			5.08091	11	1.1028
	23	0.49	5.266	3.9	8.9	10.449	9.851	5.247	0.569	5.631	5.436	0.151			5.08091	11	1.1028
	WT
	500nM IAA														average	n	stERROR
	1	180	180	179.436	179.31	180	180	179.53	180						179.785	8	0.107203
	2	180	180	179.669	179.31	173.938	180	179.53	180						179.056	8	0.737072
	3	180	178.698	173.418	179.31	177.397	177.479	179.53	180						178.229	8	0.776375
	4	180	178.698	180	179.31	180	177.479	180	180						179.436	8	0.326804
	5	142.417	178.698	180	179.31	180	159.702	166.329	178.668						170.64	8	4.84497
	6	129.289	143.13	180	179.31	139.764	159.702	166.329	178.668						159.524	8	7.06723
	7	145.905	91.032	180	179.31	139.764	104.47	143.027	138.395						140.238	8	11.0613
	8	136.507	56.31	121.608	91.146	104.89	80.068	156.038	91.541						104.763	8	11.3691
	9	138.759	18.066	123.503	91.146	66.93	70.168	103.707	91.541						87.9775	8	13.2009
	10	139.23	35.538	88.394	91.146	62.283	36.87	62.819	8.027						65.5384	8	14.4272
	11	134.05	12.398	56.377	91.146	58.158	29.501	40.833	36.327						57.3487	8	13.7176
	12	134.05	4.185	45	45	60.978	24.254	40.833	12.995						45.9119	8	14.2155
	13	134.05	5.906	37.224	8.461	60.978	5.034	40.833	12.995						38.1851	8	15.4553
	14	134.05	5.906	52.943	10.217	8.344	15.255	53.231	12.995						36.6176	8	15.5205
	15	134.05	5.906	52.943	7.341	0.902	11.198	53.231	3.013						33.573	8	16.2639
	16	134.05	5.906	52.943	4.764	7.672	11.198	43.586	3.013						32.8915	8	15.9621
	17	99.34	5.906	6.379	4.764	7.672	32.835	5.454	3.013						20.6704	8	11.7446
	18	1.411	5.906	6.379	4.764	7.672	6.116	5.454	3.013						5.08938	8	0.708803
	19	4.981	5.906	6.379	4.764	7.672	6.116	5.454	3.013						5.53563	8	0.482233
	20	4.981	5.906	6.379	4.764	7.672	6.116	5.454	3.013						5.53563	8	0.482233
	21	4.981	5.906	6.379	4.764	7.672	6.116	7.815	3.013						5.83075	8	0.559253
	22	4.981	5.906	6.379	4.764	7.672	6.116	7.815	3.013						5.83075	8	0.559253
	23	4.981	5.906	6.379	4.764	7.672	6.116	7.815	3.013						5.83075	8	0.559253
	24	4.981	5.906	6.379	4.764	7.672	6.116	7.815	3.013						5.83075	8	0.559253
	25	4.981	5.906	6.379	4.764	7.672	6.116	7.815	3.013						5.83075	8	0.559253
		4.981	5.906	6.379	4.764	7.672	6.116	7.815	3.013						5.83075	8	0.559253
[truncated: 1 more columns]

## Sheet: Figure 1B
20170922
		line	pER8 empty.
		treatment	10uM Estradiol
			1	1comp		2	2comp		3	3comp		4	4comp		5	5comp		6	6comp		7	7comp		8	8comp		9	9comp		10	10comp		11	11comp		12	12comp		13	13comp		14	14comp		15	15comp			average
		1	5.154	174.846		8.13	171.87		5.648	174.352		5.194	174.806		7.978	172.022		2.224	177.776		4.415	175.585		6.34	173.66		4.295	175.705		12.095	167.905		7.518	172.482		4.086	175.914		4.764	175.236		10.739	169.261		5.44	174.56			173.732
		2	7.27	172.73		10.091	169.909		7.765	172.235		9.462	170.538		20.961	159.039		5.194	174.806		7.125	172.875		9.574	170.426		15.306	164.694		17.021	162.979		12.127	167.873		14.036	165.964		6.096	173.904		49.399	130.601		9.246	170.754			166.622
		3	20.988	159.012		23.875	156.125		19.199	160.801		9.866	170.134		39.289	140.711		19.103	160.897		12.642	167.358		16.676	163.324		21.473	158.527		22.166	157.834		23.259	156.741		20.925	159.075		16.489	163.511		89.288	90.712		9.246	170.754			155.701
		4	24.444	155.556		39.62	140.38		21.236	158.764		10.085	169.915		48.036	131.964		10.158	169.842		10.981	169.019		32.41	147.59		32.171	147.829		22.166	157.834		25.311	154.689		21.557	158.443		17.103	162.897		89.288	90.712		23.247	156.753			151.479
		5	16.659	163.341		38.48	141.52		34.33	145.67		7.449	172.551		58.241	121.759		18.153	161.847		16.271	163.729		34.38	145.62		59.47	120.53		44.384	135.616		38.311	141.689		18.605	161.395		17.103	162.897		89.288	90.712		24.687	155.313			145.613
		6	9.062	170.938		38.48	141.52		56.602	123.398		7.902	172.098		92.726	87.274		25.241	154.759		20.283	159.717		46.332	133.668		68.199	111.801		44.248	135.752		53.909	126.091		29.745	150.255		18.925	161.075		89.288	90.712		21.954	158.046			138.474
		7	11.764	168.236		43.603	136.397		54.379	125.621		7.902	172.098		110.436	69.564		18.122	161.878		13.382	166.618		46.005	133.995		68.199	111.801		37.482	142.518		66.801	113.199		24.747	155.253		24.444	155.556		86.571	93.429		24.417	155.583			137.45
		8	15.899	164.101		121.329	58.671		75.849	104.151		17.884	162.116		120.11	59.89		21.557	158.443		18.191	161.809		50.301	129.699		68.199	111.801		63.435	116.565		95.604	84.396		39.86	140.14		24.444	155.556		61.157	118.843		24.417	155.583			125.451
		9	12.529	167.471		110.017	69.983		62.186	117.814		25.201	154.799		120.11	59.89		11.524	168.476		14.036	165.964		67.166	112.834		48.013	131.987		89.427	90.573		100.886	79.114		39.86	140.14		20.726	159.274		46.519	133.481		31.749	148.251			126.67
		10	26.881	153.119		166.759	13.241		69.634	110.366		30.256	149.744		124.024	55.976		15.06	164.94		15.642	164.358		63.728	116.272		48.366	131.634		98.584	81.416		118.498	61.502		52.765	127.235		27.529	152.471		59.534	120.466		36.726	143.274			116.401
		11	23.871	156.129		166.759	13.241		91.79	88.21		30.256	149.744		113.658	66.342		18.947	161.053		13.736	166.264		81.87	98.13		51.786	128.214		163.686	16.314		134.178	45.822		76.278	103.722		41.371	138.629		53.329	126.671		68.669	111.331			104.654
		12	41.521	138.479		160.931	19.069		105.738	74.262		41.383	138.617		114.829	65.171		27.712	152.288		14.25	165.75		95.696	84.304		38.66	141.34		178.091	1.909		147.205	32.795		151.074	28.926		42.894	137.106		57.782	122.218		91.621	88.379			92.7075
		13	53.89	126.11		145.516	34.484		111.869	68.131		48.576	131.424		122.905	57.095		27.971	152.029		16.474	163.526		107.12	72.88		69.717	110.283		177.064	2.936		126.158	53.842		170.727	9.273		52.943	127.057		61.928	118.072		111.518	68.482			86.3749
		14	66.463	113.537		156.741	23.259		156.289	23.711		48.576	131.424		122.905	57.095		27.971	152.029		16.474	163.526		127.405	52.595		112.249	67.751		177.064	2.936		119.895	60.105		170.011	9.989		49.457	130.543		68.962	111.038		123.97	56.03			77.0379
		15	67.491	112.509		134.064	45.936		167.168	12.832		70.97	109.03		129.512	50.488		27.971	152.029		24.92	155.08		148.671	31.329		124.33	55.67		139.093	40.907		129.289	50.711		170.011	9.989		49.457	130.543		80.552	99.448		127.541	52.459			73.9307
		16	76.547	103.453		150.814	29.186		159.52	20.48		70.97	109.03		117.213	62.787		40.426	139.574		72.177	107.823		148.671	31.329		124.33	55.67		139.093	40.907		135.62	44.38		143.427	36.573		51.911	128.089		78.853	101.147		127.541	52.459			70.8591
		17	82.912	97.088		149.247	30.753		158.839	21.161		70.97	109.03		133.127	46.873		43.668	136.332		78.517	101.483		163.142	16.858		124.542	55.458		151.639	28.361		151.837	28.163		143.427	36.573		51.911	128.089		90	90		141.953	38.047			64.2846
		18	82.912	97.088		150.458	29.542		174.992	5.008		78.366	101.634		133.127	46.873		43.668	136.332		94.399	85.601		156.615	23.385		136.713	43.287		165.316	14.684		151.837	28.163		143.427	36.573		57.393	122.607		94.574	85.426		151.779	28.221			58.9616
		19	82.912	97.088		150.275	29.725		167.688	12.312		78.366	101.634		132.282	47.718		39.983	140.017		104.415	75.585		156.615	23.385		143.438	36.562		167.106	12.894		145.67	34.33		149.891	30.109		57.393	122.607		94.574	85.426		158.199	21.801			58.0795
		20	110.695	69.305		147.509	32.491		170.767	9.233		96.183	83.817		132.049	47.951		40.972	139.028		141.582	38.418		174.958	5.042		154.855	25.145		167.106	12.894		151.061	28.939		168.849	11.151		57.704	122.296		94.574	85.426		158.199	21.801			48.8625
		21	124.363	55.637		172.519	7.481		164.476	15.524		92.353	87.647		133.622	46.378		38.705	141.295		153.435	26.565		174.958	5.042		165.964	14.036		167.699	12.301		150.029	29.971		156.991	23.009		57.704	122.296		132.171	47.829		157.932	22.068			43.8053
		22	124.363	55.637		168.335	11.665		155.348	24.652		100.514	79.486		123.828	56.172		67.813	112.187		172.904	7.096		162.181	17.819		165.16	14.84		166.385	13.615		172.235	7.765		128.66	51.34		105.093	74.907		161.779	18.221		167.27	12.73			37.2088
		23	124.363	55.637		162.384	17.616		171.272	8.728		100.514	79.486		135.655	44.345		67.813	112.187		172.904	7.096		162.181	17.819		166.474	13.526		166.608	13.392		172.235	7.765		137.663	42.337		127.504	52.496		161.779	18.221		169.611	10.389			33.4027
		24	143.489	36.511		162.384	17.616		171.272	8.728		100.514	79.486		140.064	39.936		103.318	76.682		172.904	7.096		162.181	17.819		166.474	13.526		166.608	13.392		172.235	7.765		144.019	35.981		127.504	52.496		161.779	18.221		169.611	10.389			29.0429
		25	143.489	36.511		162.384	17.616		173.134	6.866		100.514	79.486		140.064	39.936		103.318	76.682		165.256	14.744		161.878	18.122		173.29	6.71		174.289	5.711		172.235	7.765		171.158	8.842		127.504	52.496		164.497	15.503		169.611	10.389			26.4919
		26	143.489	36.511		167.276	12.724		173.134	6.866		111.371	68.629		146.452	33.548		118.367	61.633		165.256	14.744		161.878	18.122		173.29	6.71		174.289	5.711		172.235	7.765		171.158	8.842		127.504	52.496		164.497	15.503		169.611	10.389			24.0129
		27	143.489	36.511		159.893	20.107		173.134	6.866		111.371	68.629		146.452	33.548		122.421	57.579		154.983	25.017		161.378	18.622		178.594	1.406		174.289	5.711		172.235	7.765		171.158	8.842		127.504	52.496		163.386	16.614		170.458	9.542			24.617
		28
		29
		30
		line	pER8 YUC6
		treatment	10uM Estradiol
			1	1comp		2	2comp		3	3comp		4	4comp		5	5comp		6	6comp		7	7comp		8	8comp		9	9comp		10	10comp		11	11comp		12	12comp		13	13comp		14	14comp		15	15comp			average
		1	7.765	172.235		10.305	169.695		7.595	172.405		11.497	168.503		16.858	163.142		11.31	168.69		8.259	171.741		3.576	176.424		3.814	176.186		9.462	170.538		15.018	164.982															170.413
		2	13.671	166.329		31.855	148.145		18.435	161.565		34.968	145.032		31.855	148.145		24.258	155.742		32.935	147.065		13.241	166.759		12.787	167.213		25.694	154.306		23.962	156.038															156.031
		3	13.671	166.329		39.472	140.528		14.323	165.677		34.968	145.032		37.659	142.341		24.258	155.742		38.022	141.978		18.435	161.565		16.587	163.413		25.694	154.306		23.962	156.038															153.904
		4	21.615	158.385		36.486	143.514		25.017	154.983		37.875	142.125		39.161	140.839		31.452	148.548		34.592	145.408		27.443	152.557		14.036	165.964		24.274	155.726		41.121	138.879															149.721
		5	32.106	147.894		36.486	143.514		26.565	153.435		33.179	146.821		36.229	143.771		23.987	156.013		35.897	144.103		27.443	152.557		14.036	165.964		29.638	150.362		41.121	138.879															149.392
		6	27.897	152.103		46.559	133.441		26.565	153.435		33.179	146.821		30.964	149.036		23.987	156.013		41.065	138.935		25.168	154.832		14.901	165.099		29.638	150.362		41.505	138.495															148.961
		7	34.099	145.901		46.559	133.441		27.637	152.363		32.983	147.017		33.096	146.904		26.378	153.622		40.365	139.635		22.521	157.479		11.393	168.607		34.659	145.341		41.505	138.495															148.073
		8	34.099	145.901		43.311	136.689		27.962	152.038		32.983	147.017		37.025	142.975		22.989	157.011		40.365	139.635		29.975	150.025		19.231	160.769		31.781	148.219		35.538	144.462															147.704
		9	29.982	150.018		43.311	136.689		35.838	144.162		29.026	150.974		28.183	151.817		22.989	157.011		42.333	137.667		26.15	153.85		24.444	155.556		28.428	151.572		37.287	142.713															148.366
		10	29.883	150.117		43.591	136.409		35.838	144.162		39.017	140.983		29.638	150.362		24.651	155.349		44.697	135.303		29.09	150.91		21.371	158.629		34.043	145.957		39.391	140.609															146.254
		11	36.116	143.884		43.591	136.409		41.379	138.621		42.894	137.106		30.129	149.871		29.932	150.068		55.408	124.592		32.234	147.766		30.161	149.839		37.948	142.052		39.391	140.609															141.892
		12	36.116	143.884		50.755	129.245		41.379	138.621		42.962	137.038		30.906	149.094		29.932	150.068		62.342	117.658		30.938	149.062		24.051	155.949		37.948	142.052		35.914	144.086															141.523
		13	35.194	144.806		55.564	124.436		41.379	138.621		50.641	129.359		30.01	149.99		28.168	151.832		64.88	115.12		34.249	145.751		26.167	153.833		35.727	144.273		37.763	142.237															140.023
		14	43.768	136.232		50.599	129.401		43.059	136.941		50.641	129.359		29.798	150.202		28.168	151.832		75.895	104.105		35.667	144.333		26.835	153.165		35.727	144.273		40.402	139.598															138.131
		15	54.349	125.651		50.599	129.401		43.059	136.941		51.318	128.682		29.798	150.202		40.396	139.604		78.797	101.203		47.49	132.51		25.6	154.4		29.932	150.068		40.402	139.598															135.296
		16	54.349	125.651		58.241	121.759		48.417	131.583		64.189	115.811		27.538	152.462		54.782	125.218		81.027	98.973		50.474	129.526		32.213	147.787		35.485	144.515		41.451	138.549															130.167
		17	49.926	130.074		57.936	122.064		55.217	124.783		64.839	115.161		27.538	152.462		55.122	124.878		90.63	89.37		56.241	123.759		32.213	147.787		38.469	141.531		41.451	138.549															128.22
		18	49.926	130.074		59.559	120.441		55.217	124.783		64.839	115.161		27.799	152.201		64.012	115.988		90.118	89.882		62.613	117.387		27.597	152.403		37.776	142.224		39.627	140.373															127.356
		19	77.905	102.095		70.346	109.654		61.22	118.78		82.634	97.366		24.496	155.504		63.789	116.211		99.624	80.376		68.199	111.801		27.597	152.403		33.2	146.8		41.424	138.576															120.87
		20	78.627	101.373		64.947	115.053		61.336	118.664		85.601	94.399		26.996	153.004		63.789	116.211		98.461	81.539		82.63	97.37		35.387	144.613		43.122	136.878		41.424	138.576															117.971
		21	98.215	81.785		81.8	98.2		64.472	115.528		92.854	87.146		41.319	138.681		69.075	110.925		94.268	85.732		82.776	97.224		35.387	144.613		47.949	132.051		44.491	135.509															111.581
		22	95.618	84.382		81.8	98.2		64.472	115.528		97.039	82.961		41.319	138.681		69.444	110.556		97.729	82.271		86.961	93.039		28.55	151.45		47.949	132.051		43.102	136.898															111.456
		23	95.618	84.382		76.165	103.835		71.2	108.8		102.529	77.471		41.319	138.681		69.444	110.556		102.456	77.544		96.86	83.14		28.55	151.45		49.97	130.03		43.102	136.898															109.344
		24	128.718	51.282		76.165	103.835		80.811	99.189		102.529	77.471		44.01	135.99		75.91	104.09		98.756	81.244		105.313	74.687		28.982	151.018		49.97	130.03		43.102	136.898															104.158
		25	128.718	51.282		82.569	97.431		77.502	102.498		115.233	64.767		45.713	134.287		78.996	101.004		101.31	78.69		116.816	63.184		31.102	148.898		52.584	127.416		39.094	140.906															100.942
		26	128.718	51.282		82.569	97.431		77.502	102.498		110.947	69.053		31.176	148.824		78.996	101.004		114.579	65.421		132.274	47.726		32.005	147.995		52.584	127.416		39.094	140.906															99.9596
		27	128.718	51.282		82.569	97.431		87.864	92.136		110.947	69.053		31.176	148.824		87.777	92.223		114.681	65.319		146.746	33.254		28.682	151.318		52.584	127.416		41.424	138.576															96.9847
		28
		29
		30
20180127
		line	pER8-EMPTY
		treatment	mock
			1	1comp		2	2comp		3	3comp		4	4comp		5	5comp		6	6comp		7	7comp		8	8comp		9	9comp		10	10comp		11	11comp		12	12comp		13	13comp		14	14comp		15	15comp			average
		1	2.256	177.744		5.194	174.806		7.142	172.858		9.349	170.651		11.668	168.332		4.533	175.467		9.211	170.789		8.106	171.894																								172.818
		2	12.853	167.147		22.874	157.126		12.995	167.005		17.768	162.232		29.593	150.407		11.073	168.927		9.349	170.651		8.771	171.229																								164.341
		3	22.478	157.522		29.664	150.336		19.338	160.662		29.805	150.195		39.036	140.964		20.149	159.851		17.759	162.241		18.296	161.704																								155.434
		4	26.728	153.272		37.859	142.141		29.304	150.696		31.288	148.712		47.726	132.274		18.435	161.565		24.503	155.497		28.614	151.386																								149.443
		5	25.983	154.017		48.608	131.392		26.415	153.585		30.282	149.718		44.556	135.444		20.084	159.916		28.843	151.157		31.751	148.249																								147.935
		6	26.131	153.869		50.237	129.763		34.333	145.667		24.136	155.864		52.465	127.535		16.265	163.735		25.935	154.065		51.459	128.541																								144.88
		7	32.869	147.131		43.755	136.245		48.475	131.525		38.089	141.911		52.765	127.235		18.954	161.046		22.991	157.009		101.813	78.187																								135.036
		8	35.168	144.832		45.454	134.546		65.101	114.899		45.523	134.477		75.379	104.621		22.408	157.592		27.585	152.415		129.157	50.843																								124.278
		9	55.981	124.019		60.402	119.598		93.395	86.605		62.734	117.266		85.272	94.728		19.983	160.017		48.304	131.696		158.815	21.185																								106.889
		10	129.079	50.921		79.055	100.945		150.461	29.539		90.195	89.805		111.491	68.509		27.814	152.186		45.614	134.386		166.562	13.438																								79.9661
		11	149.171	30.829		102.929	77.071		164.388	15.612		89.63	90.37		127.7	52.3		65.05	114.95		63.023	116.977		161.597	18.403																								64.564
		12	174.63	5.37		105.669	74.331		169.509	10.491		110.019	69.981		135.881	44.119		83.932	96.068		78.883	101.117		163.965	16.035																								52.189
		13	179.024	0.976		130.187	49.813		169.509	10.491		119.159	60.841		157.422	22.578		117.506	62.494		98.928	81.072		170.914	9.086																								37.1689
		14	155.459	24.541		146.55	33.45		178.137	1.863		117.025	62.975		172.944	7.056		136.27	43.73		93.252	86.748		176.784	3.216																								32.9474
		15	157.376	22.624		148.988	31.012		150.792	29.208		124.38	55.62		172.047	7.953		153.042	26.958		116.301	63.699		176.784	3.216																								30.0363
		16	167.303	12.697		164.355	15.645		149.036	30.964		137.78	42.22		175.358	4.642		160.633	19.367		137.128	42.872		168.913	11.087																								22.4367
		17	170.812	9.188		164.355	15.645		160.219	19.781		135.289	44.711		175.358	4.642		164.427	15.573		149.615	30.385		177.879	2.121																								17.7558
		18	170.812	9.188		164.355	15.645		168.929	11.071		154.565	25.435		175.358	4.642		166.858	13.142		165.559	14.441		174.685	5.315																								12.3599
		19	179.928	0.072		167.648	12.352		170.974	9.026		162.474	17.526		174.245	5.755		165.964	14.036		168.322	11.678		170.112	9.888																								10.0416
		20	176.884	3.116		167.648	12.352		171.747	8.253		165.964	14.036		174.245	5.755		175.581	4.419		171.986	8.014		173.325	6.675																								7.8275
		21	176.884	3.116		169.447	10.553		170.538	9.462		163.301	16.699		179.739	0.261		173.418	6.582		176.757	3.243		176.634	3.366																								6.66025
		22	176.884	3.116		163.274	16.726		176.32	3.68		169.857	10.143		174.006	5.994		173.79	6.21		173.341	6.659		176.634	3.366																								6.98675
		23	178.21	1.79		161.834	18.166		177.397	2.603		178.901	1.099		175.653	4.347		163.409	16.591		179.579	0.421		176.82	3.18																								6.02463
		24	178.21	1.79		159.31	20.69		177.397	2.603		178.901	1.099		176.987	3.013		168.676	11.324		179.579	0.421		174.56	5.44																								5.7975
		25	178.21	1.79		159.073	20.927		173.591	6.409		174.806	5.194		176.82	3.18		169.184	10.816		169.239	10.761		174.56	5.44																								8.06462
		26	174.352	5.648		169.525	10.475		173.591	6.409		167.679	12.321		176.82	3.18		168.24	11.76		168.69	11.31		174.56	5.44																								8.31787
		27	174.352	5.648		167.384	12.616		175.551	4.449		166.344	13.656		176.82	3.18		169.691	10.309		174.004	5.996		177.274	2.726																								7.3225
		28	179.925	0.075		177.064	2.936		175.551	4.449		169.961	10.039		174.445	5.555		175.486	4.514		172.7	7.3		169.82	10.18																								5.631
		29	180	0		177.064	2.936		175.684	4.316		169.961	10.039		172.185	7.815		179.572	0.428		172.7	7.3		171.043	8.957																								5.22387
		30	180	0		178.843	1.157		175.684	4.316		169.961	10.039		173.654	6.346		176.82	3.18		174.905	5.095		170.749	9.251																								4.923
		line	pER YUCCA 6
		treatment	10uM Est, mock
			1	1comp		2	2comp		3	3comp		4	4comp		5	5comp		6	6comp		7	7comp		8	8comp		9	9comp		10	10comp		11	11comp		12	12comp		13	13comp		14	14comp		15	15comp			average
		1	3.794	176.206		2.688	177.312		4.437	175.563		3.518	176.482		9.279	170.721		4.462	175.538		5.6	174.4																											175.175
		2	7.765	172.235		5.641	174.359		14.319	165.681		24.85	155.15		14.931	165.069		18.122	161.878		12.695	167.305																											165.954
		3	15.848	164.152		16.699	163.301		37.463	142.537		45.19	134.81		26.126	153.874		11.569	168.431		22.091	157.909																											155.002
		4	15.542	164.458		18.88	161.12		30.301	149.699		39.64	140.36		34.236	145.764		16.195	163.805		20.3	159.7																											154.987
		5	22.029	157.971		25.076	154.924		30.563	149.437		42.51	137.49		35.872	144.128		16.928	163.072		20.783	159.217																											152.32
		6	17.526	162.474		28.448	151.552		31.608	148.392		52.194	127.806		39.283	140.717		15.114	164.886		20.514	159.486																											150.759
		7	17.526	162.474		28.448	151.552		32.928	147.072		53.999	126.001		30.862	149.138		15.255	164.745		25.259	154.741																											150.818
		8	17.021	162.979		26.196	153.804		32.102	147.898		50.906	129.094		34.24	145.76		16.37	163.63		20.626	159.374																											151.791
		9	17.021	162.979		26.196	153.804		40.651	139.349		43.358	136.642		32.994	147.006		15.752	164.248		20.626	159.374																											151.915
		10	21.615	158.385		26.636	153.364		34.299	145.701		50.906	129.094		59.448	120.552		15.752	164.248		29.465	150.535																											145.983
		11	21.23	158.77		26.013	153.987		43.283	136.717		49.95	130.05		57.894	122.106		20.787	159.213		28.851	151.149																											144.57
		12	27.281	152.719		26.83	153.17		43.283	136.717		54.634	125.366		57.894	122.106		14.896	165.104		35.618	144.382																											142.795
		13	28.766	151.234		26.83	153.17		56.31	123.69		61.082	118.918		68.962	111.038		18.214	161.786		38.316	141.684																											137.36
		14	28.766	151.234		26.025	153.975		53.973	126.027		64.085	115.915		49.793	130.207		18.258	161.742		29.055	150.945																											141.435
		15	28.766	151.234		28.918	151.082		61.489	118.511		64.693	115.307		59.153	120.847		17.441	162.559		33.896	146.104																											137.949
		16	20.326	159.674		24.22	155.78		61.489	118.511		67.818	112.182		47.445	132.555		22.084	157.916		41.805	138.195																											139.259
		17	25.121	154.879		24.22	155.78		61.489	118.511		97.501	82.499		47.445	132.555		22.084	157.916		41.805	138.195																											134.334
		18	25.121	154.879		25.633	154.367		120.964	59.036		105.041	74.959		62.309	117.691		35.559	144.441		43.734	136.266																											120.234
		19	23.35	156.65		25.633	154.367		128.718	51.282		123.596	56.404		63.336	116.664		44.702	135.298		41.249	138.751																											115.631
		20	28.819	151.181		19.692	160.308		129.391	50.609		123.596	56.404		65.376	114.624		44.702	135.298		43.781	136.219																											114.949
		21	28.819	151.181		19.692	160.308		138.728	41.272		132.668	47.332		59.186	120.814		91.868	88.132		48.894	131.106																											105.735
		22	29.061	150.939		22.224	157.776		138.728	41.272		134.474	45.526		71.03	108.97		91.868	88.132		52.581	127.419																											102.862
		23	31.345	148.655		23.962	156.038		142.125	37.875		127.193	52.807		61.699	118.301		131.29	48.71		54.402	125.598																											98.2834
		24	37.832	142.168		23.962	156.038		142.125	37.875		113.473	66.527		74.745	105.255		151.649	28.351		60.362	119.638																											93.6931
		25	37.832	142.168		23.962	156.038		125.662	54.338		110.516	69.484		90	90		163.591	16.409		62.41	117.59																											92.2896
		26	33.814	146.186		25.196	154.804		123.972	56.028		101.853	78.147		90.403	89.597		163.591	16.409		62.41	117.59																											94.1087
		27	36.819	143.181		28.183	151.817		117.35	62.65		103.485	76.515		90.403	89.597		163.591	16.409		60.304	119.696																											94.2664
		28	36.819	143.181		28.183	151.817		115.353	64.647		110.231	69.769		90.403	89.597		167.81	12.19		71.103	108.897																											91.4426
		29	39.382	140.618		30.35	149.65		110.772	69.228		98.203	81.797		112.834	67.166		167.81	12.19		71.103	108.897																											89.9351
		30	39.382	140.618		30.35	149.65		117.213	62.787		116.164	63.836		92.943	87.057		157.545	22.455		71.103	108.897																											90.7571
20180130
		line	pER EMPTY
		treatment	10 uM Estradiol
			1	1comp		2	2comp		3	3comp		4	4comp		5	5comp		6	6comp		7	7comp		8	8comp		9	9comp		10	10comp		11	11comp		12	12comp		13	13comp		14	14comp		15	15comp			average
		1	8.487	171.513		5.885	174.115		7.125	172.875		4.772	175.228		4.449	175.551		5.194	174.806		8.774	171.226		6.384	173.616		6.384	173.616		5.856	174.144		4.276	175.724		7.248	172.752		9.462	170.538		6.282	173.718		3.954	176.046			173.698
		2	15.362	164.638		9.851	170.149		7.579	172.421		12.367	167.633		11.72	168.28		7.464	172.536		13.196	166.804		7.913	172.087		7.913	172.087		11.038	168.962		4.276	175.724		12.995	167.005		9.913	170.087		7.559	172.441		3.954	176.046			170.46
		3	16.637	163.363		21.576	158.424		25.994	154.006		27.972	152.028		14.181	165.819		14.261	165.739		23.275	156.725		30.964	149.036		30.964	149.036		20.232	159.768		11.617	168.383		12.529	167.471		18.665	161.335		21.93	158.07		8.789	171.211			160.028
		4	29.312	150.688		45	135		37.918	142.082		44.413	135.587		32.016	147.984		27.784	152.216		24.066	155.934		39.98	140.02		39.98	140.02		29.665	150.335		41.269	138.731		20.472	159.528		42.397	137.603		33.732	146.268		33.029	146.971			145.264
		5	45	135		45	135		50.29	129.71		44.413	135.587		32.016	147.984		36.673	143.327		24.066	155.934		39.98	140.02		39.98	140.02		30.914	149.086		74.136	105.864		20.472	159.528		53.381	126.619		88.528	91.472		39.472	140.528			135.712
		6	55.008	124.992		60.494	119.506		26.691	153.309		67.814	112.186		35.85	144.15		36.673	143.327		23.833	156.167		40.446	139.554		40.446	139.554		23.839	156.161		74.138	105.862		41.025	138.975		41.186	138.814		156.133	23.867		26.565	153.435			129.991
		7	73.191	106.809		60.494	119.506		33.419	146.581		75.373	104.627		40.154	139.846		66.801	113.199		20.447	159.553		49.268	130.732		49.268	130.732		56.791	123.209		88.059	91.941		62.89	117.11		41.186	138.814		159.328	20.672		26.565	153.435			119.784
		8	82.24	97.76		61.73	118.27		33.419	146.581		75.373	104.627		59.289	120.711		66.801	113.199		20.447	159.553		44.423	135.577		44.423	135.577		108.61	71.39		93.453	86.547		85.354	94.646		53.509	126.491		177.709	2.291		20.837	159.163			111.492
		9	110.089	69.911		79.702	100.298		75.7	104.3		82.095	97.905		75.799	104.201		76.264	103.736		20.269	159.731		53.629	126.371		53.629	126.371		171.104	8.896		104.621	75.379		85.354	94.646		53.509	126.491		170.569	9.431		23.537	156.463			97.6087
		10	128.346	51.654		92.165	87.835		95.73	84.27		96.34	83.66		109.37	70.63		106.189	73.811		20.269	159.731		77.31	102.69		77.31	102.69		171.925	8.075		123.868	56.132		77.342	102.658		61.876	118.124		170.569	9.431		28.985	151.015			84.1604
		11	128.346	51.654		108.955	71.045		134.745	45.255		108.939	71.061		109.37	70.63		127.981	52.019		47.359	132.641		85.131	94.869		85.131	94.869		167.688	12.312		142.662	37.338		62.409	117.591		71.385	108.615		143.13	36.87		49.677	130.323			75.1395
		12	139.536	40.464		128.207	51.793		134.745	45.255		126.296	53.704		127.478	52.522		144.64	35.36		61.233	118.767		85.131	94.869		85.131	94.869		169.526	10.474		152.745	27.255		75.09	104.91		71.385	108.615		140.214	39.786		76.289	103.711			65.4903
		13	139.536	40.464		139.838	40.162		153.042	26.958		139.977	40.023		127.478	52.522		149.467	30.533		120.641	59.359		95.057	84.943		95.057	84.943		176.388	3.612		163.142	16.858		75.09	104.91		78.371	101.629		147.886	32.114		102.255	77.745			53.1183
		14	147.829	32.171		152.148	27.852		153.042	26.958		139.977	40.023		144.009	35.991		153.004	26.996		120.641	59.359		109.075	70.925		109.075	70.925		177.397	2.603		168.69	11.31		98.225	81.775		78.371	101.629		157.579	22.421		102.255	77.745			45.9122
		15	149.534	30.466		163.413	16.587		153.042	26.958		139.977	40.023		147.319	32.681		153.021	26.979		140.485	39.515		114.365	65.635		114.365	65.635		177.397	2.603		168.69	11.31		98.225	81.775		93.677	86.323		157.579	22.421		114.526	65.474			40.959
		16	152.024	27.976		168.69	11.31		179.519	0.481		154.974	25.026		158.369	21.631		153.021	26.979		140.485	39.515		114.365	65.635		114.365	65.635		174.806	5.194		169.491	10.509		127.107	52.893		103.465	76.535		165.295	14.705		114.526	65.474			33.9665
		17	168.242	11.758		171.591	8.409		179.519	0.481		159.755	20.245		163.194	16.806		155.815	24.185		156.501	23.499		114.365	65.635		114.365	65.635		167.811	12.189		175.03	4.97		129.936	50.064		123.323	56.677		165.295	14.705		126.129	53.871			28.6086
		18	175.496	4.504		171.45	8.55		179.519	0.481		159.755	20.245		164.449	15.551		155.815	24.185		160.233	19.767		143.293	36.707		143.293	36.707		176.82	3.18		175.03	4.97		145.408	34.592		151.164	28.836		165.295	14.705		126.129	53.871			20.4567
		19	175.496	4.504		171.45	8.55		179.519	0.481		159.755	20.245		164.449	15.551		167.905	12.095		163.453	16.547		143.293	36.707		143.293	36.707		176.82	3.18		175.03	4.97		157.637	22.363		151.164	28.836		165.295	14.705		157.857	22.143			16.5056
		20	179.6	0.4		170.202	9.798		175.691	4.309		158.199	21.801		176.82	3.18		167.905	12.095		163.453	16.547		151.074	28.926		151.074	28.926		179.603	0.397		175.03	4.97		157.637	22.363		173.397	6.603		165.295	14.705		157.857	22.143			13.1442
		21	178.379	1.621		170.598	9.402		175.691	4.309		158.199	21.801		176.82	3.18		167.905	12.095		174.665	5.335		151.074	28.926		151.074	28.926		179.603	0.397		175.03	4.97		158.743	21.257		173.397	6.603		168.945	11.055		157.857	22.143			12.1347
		22	176.78	3.22		173.77	6.23		171.523	8.477		158.199	21.801		177.51	2.49		166.755	13.245		174.665	5.335		154.983	25.017		154.983	25.017		175.03	4.97		175.03	4.97		158.743	21.257		179.774	0.226		177.064	2.936		157.857	22.143			11.1556
		23	174.388	5.612		175.866	4.134		171.523	8.477		158.199	21.801		178.103	1.897		171.102	8.898		178.61	1.39		167.175	12.825		167.175	12.825		177.169	2.831		177.282	2.718		164.291	15.709		179.774	0.226		177.064	2.936		157.857	22.143			8.2948
		24	171.87	8.13		175.866	4.134		174.094	5.906		158.199	21.801		178.62	1.38		171.102	8.898		178.61	1.39		167.175	12.825		167.175	12.825		172.958	7.042		177.282	2.718		170.838	9.162		179.774	0.226		177.922	2.078		157.857	22.143			8.04387
		25	171.87	8.13		179.206	0.794		172.36	7.64		161.565	18.435		178.675	1.325		174.719	5.281		178.61	1.39		173.418	6.582		173.418	6.582		176.006	3.994		179.755	0.245		175.236	4.764		179.569	0.431		177.922	2.078		155.344	24.656			6.15513
		26	171.87	8.13		179.206	0.794		172.36	7.64		161.565	18.435		178.069	1.931		177.82	2.18		178.5	1.5		173.418	6.582		173.418	6.582		176.006	3.994		179.755	0.245		175.365	4.635		179.569	0.431		177.922	2.078		155.344	24.656			5.98753
		27	168.837	11.163		176.82	3.18		172.36	7.64		161.565	18.435		178.069	1.931		177.82	2.18		178.5	1.5		173.589	6.411		173.589	6.411		176.006	3.994		173.66	6.34		171.285	8.715		179.569	0.431		177.922	2.078		166.309	13.691			6.27333
		28	177.149	2.851		176.82	3.18		172.36	7.64		161.565	18.435		178.069	1.931		178.979	1.021		178.5	1.5		173.589	6.411		173.589	6.411		170.838	9.162		173.66	6.34		171.285	8.715		179.569	0.431		177.922	2.078		166.309	13.691			5.98647
		29	178.968	1.032		174.461	5.539		175.091	4.909		164.932	15.068		178.069	1.931		178.979	1.021		178.5	1.5		175.647	4.353		175.647	4.353		171.057	8.943		176.82	3.18		173.377	6.623		179.569	0.431		177.922	2.078		166.309	13.691			4.9768
		30	178.294	1.706		174.461	5.539		175.091	4.909		169.33	10.67		178.069	1.931		178.979	1.021		178.5	1.5		175.641	4.359		175.641	4.359		174.006	5.994		171.205	8.795		173.377	6.623		179.569	0.431		177.922	2.078		169.839	10.161			4.67173
		line	pER YUC6
		treatment	10 uM Estradiol
			1	1comp		2	2comp		3	3comp		4	4comp		5	5comp		6	6comp		7	7comp		8	8comp		9	9comp		10	10comp		11	11comp		12	12comp		13	13comp		14	14comp		15	15comp			average
		1	6.9	173.1		8.746	171.254		7.487	172.513		9.823	170.177		11.752	168.248		6.24	173.76		7.431	172.569		9.707	170.293		10.587	169.413		5.711	174.289		6.973	173.027		8.388	171.612		3.264	176.736		9.605	170.395		9.866	170.134			171.835
		2	8.13	171.87		8.746	171.254		11.915	168.085		9.823	170.177		21.239	158.761		17.11	162.89		23.369	156.631		9.707	170.293		11.524	168.476		6.772	173.228		6.973	173.027		8.388	171.612		9.596	170.404		26.25	153.75		20.283	159.717			166.678
		3	28.289	151.711		19.035	160.965		24.495	155.505		15.945	164.055		24.444	155.556		17.11	162.89		35.049	144.951		16.456	163.544		14.344	165.656		12.902	167.098		19.367	160.633		21.866	158.134		9.596	170.404		39.627	140.373		32.842	147.158			157.909
		4	29.143	150.857		26.328	153.672		29.766	150.234		17.834	162.166		25.378	154.622		17.74	162.26		27.474	152.526		23.552	156.448		9.762	170.238		12.902	167.098		22.62	157.38		28.331	151.669		10.134	169.866		39.627	140.373		32.471	147.529			156.463
		5	27.506	152.494		26.328	153.672		29.766	150.234		20.556	159.444		19.871	160.129		19.189	160.811		38.618	141.382		22.6	157.4		10.409	169.591		17.689	162.311		22.068	157.932		24.07	155.93		10.134	169.866		50.812	129.188		22.62	157.38			155.851
		6	23.429	156.571		38.66	141.34		37.124	142.876		36.415	143.585		25.769	154.231		13.923	166.077		38.45	141.55		22.6	157.4		10.409	169.591		16.504	163.496		22.291	157.709		61.074	118.926		13.574	166.426		43.345	136.655		63.622	116.378			148.854
		7	20.011	159.989		67.521	112.479		44.76	135.24		36.415	143.585		21.65	158.35		11.31	168.69		32.525	147.475		15.137	164.863		11.746	168.254		13.671	166.329		22.291	157.709		65.761	114.239		13.574	166.426		35.769	144.231		47.49	132.51			149.358
		8	29.982	150.018		83.781	96.219		40.286	139.714		36.415	143.585		21.65	158.35		11.31	168.69		32.525	147.475		19.281	160.719		11.746	168.254		13.671	166.329		22.291	157.709		67.703	112.297		11.295	168.705		35.769	144.231		55.635	124.365			147.111
		9	29.982	150.018		83.781	96.219		40.286	139.714		38.119	141.881		19.195	160.805		13.941	166.059		27.111	152.889		19.281	160.719		14.462	165.538		14.036	165.964		22.291	157.709		67.703	112.297		11.295	168.705		24.883	155.117		55.635	124.365			147.867
		10	29.982	150.018		59.036	120.964		40.286	139.714		38.119	141.881		19.195	160.805		16.858	163.142		22.421	157.579		16.157	163.843		19.197	160.803		19.302	160.698		21.251	158.749		65.76	114.24		10.295	169.705		33.811	146.189		54.767	125.233			148.904
		11	59.948	120.052		66.161	113.839		40.286	139.714		38.119	141.881		19.195	160.805		16.801	163.199		20.772	159.228		14.062	165.938		19.197	160.803		19.302	160.698		28.768	151.232		65.76	114.24		10.192	169.808		33.367	146.633		48.763	131.237			146.62
		12	36.87	143.13		66.161	113.839		36.812	143.188		41.749	138.251		23.199	156.801		16.801	163.199		18.904	161.096		21.26	158.74		17.845	162.155		19.302	160.698		28.768	151.232		60.754	119.246		10.192	169.808		33.576	146.424		52.15	127.85			147.71
		13	36.87	143.13		61.639	118.361		44.157	135.843		36.347	143.653		30.733	149.267		20.469	159.531		23.4	156.6		24.736	155.264		17.845	162.155		19.654	160.346		28.768	151.232		60.754	119.246		9.189	170.811		45.484	134.516		52.15	127.85			145.854
		14	36.87	143.13		61.639	118.361		44.157	135.843		36.347	143.653		27.471	152.529		21.474	158.526		23.282	156.718		24.736	155.264		16.69	163.31		22.427	157.573		27.791	152.209		60.754	119.246		12.059	167.941		45.484	134.516		61.92	118.08			145.127
		15	58.837	121.163		61.639	118.361		44.157	135.843		36.336	143.664		40.627	139.373		21.801	158.199		23.282	156.718		24.736	155.264		14.738	165.262		22.427	157.573		27.791	152.209		54.162	125.838		6.261	173.739		45.597	134.403		69.634	110.366			143.198
		16	58.837	121.163		61.639	118.361		50.886	129.114		39.006	140.994		40.627	139.373		21.801	158.199		23.282	156.718		24.736	155.264		14.871	165.129		24.981	155.019		29.971	150.029		55.194	124.806		8.686	171.314		46.769	133.231		69.634	110.366			141.939
		17	47.195	132.805		53.209	126.791		55.46	124.54		56.31	123.69		55.976	124.024		19.026	160.974		24.288	155.712		42.643	137.357		14.871	165.129		45	135		32.735	147.265		55.194	124.806		15.068	164.932		46.769	133.231		72.784	107.216			137.565
		18	55.856	124.144		53.209	126.791		53.249	126.751		49.781	130.219		62.26	117.74		19.026	160.974		24.288	155.712		46.756	133.244		21.161	158.839		45	135		32.735	147.265		62.898	117.102		15.068	164.932		41.424	138.576		72.784	107.216			136.3
		19	55.856	124.144		53.209	126.791		57.287	122.713		49.781	130.219		55.628	124.372		19.333	160.667		24.133	155.867		46.756	133.244		21.161	158.839		48.18	131.82		36.87	143.13		68.199	111.801		11.853	168.147		41.424	138.576		74.701	105.299			135.709
		20	55.856	124.144		61.489	118.511		79.915	100.085		49.781	130.219		61.611	118.389		22.751	157.249		24.133	155.867		42.127	137.873		25.694	154.306		43.603	136.397		42.709	137.291		61.911	118.089		11.853	168.147		41.424	138.576		100.681	79.319			131.631
		21	69.528	110.472		61.489	118.511		79.915	100.085		51.928	128.072		72.302	107.698		22.751	157.249		26.93	153.07		42.127	137.873		36.547	143.453		41.348	138.652		42.709	137.291		64.084	115.916		22.665	157.335		40.914	139.086		100.681	79.319			128.272
		22	72.466	107.534		61.489	118.511		70.698	109.302		47.269	132.731		72.302	107.698		30.562	149.438		24.848	155.152		42.127	137.873		36.97	143.03		53.043	126.957		49.574	130.426		64.084	115.916		24.403	155.597		47.789	132.211		97.125	82.875			127.017
		23	72.466	107.534		67.252	112.748		70.698	109.302		48.489	131.511		85.63	94.37		31.684	148.316		24.848	155.152		45.996	134.004		63.73	116.27		56.821	123.179		49.574	130.426		61.26	118.74		24.403	155.597		47.789	132.211		94.418	85.582			123.663
		24	72.466	107.534		67.252	112.748		76.321	103.679		53.684	126.316		106.08	73.92		39.671	140.329		41.262	138.738		45.996	134.004		86.317	93.683		56.821	123.179		42.955	137.045		61.26	118.74		33.985	146.015		44.098	135.902		94.418	85.582			118.494
		25	69.228	110.772		72.371	107.629		80.92	99.08		60.121	119.879		95.364	84.636		36.249	143.751		43.844	136.156		45.996	134.004		73.026	106.974		51.435	128.565		42.955	137.045		61.26	118.74		31.305	148.695		51.96	128.04		100.784	79.216			118.879
		26	62.475	117.525		65.041	114.959		97.628	82.372		60.121	119.879		95.364	84.636		45.955	134.045		41.874	138.126		45.741	134.259		63.928	116.072		51.435	128.565		42.955	137.045		46.169	133.831		40.185	139.815		54.128	125.872		100.784	79.216			119.081
		27	62.475	117.525		73.171	106.829		84.579	95.421		51.766	128.234		92.263	87.737		58.259	121.741		37.925	142.075		31.961	148.039		76.315	103.685		58.149	121.851		49.552	130.448		51.852	128.148		40.185	139.815		54.128	125.872		100.784	79.216			118.442
		28	62.475	117.525		73.171	106.829		84.515	95.485		51.766	128.234		95.68	84.32		63.197	116.803		48.021	131.979		31.961	148.039		82.026	97.974		58.149	121.851		49.552	130.448		51.852	128.148		49.215	130.785		54.128	125.872		113.313	66.687			115.399
		29	73.557	106.443		75.923	104.077		79.796	100.204		62.113	117.887		95.68	84.32		63.942	116.058		48.021	131.979		33.729	146.271		91.766	88.234		52.306	127.694		49.552	130.448		51.852	128.148		49.215	130.785		61.062	118.938		113.313	66.687			113.212
		30	73.557	106.443		75.923	104.077		67.38	112.62		62.113	117.887		96.988	83.012		63.942	116.058		54.227	125.773		33.729	146.271		91.766	88.234		52.306	127.694		49.552	130.448		51.852	128.148		55.008	124.992		76.493	103.507		113.313	66.687			112.123
[truncated: 2 more columns]

## Sheet: Figure 1E
20190207
		line	WT
		treatment
			1	1comp		2	2comp		3	3comp		4	4comp		5	5comp		6	6comp		7	7comp		8	8comp		9	9comp		10	10comp		11	11comp		12	12comp		13	13comp		14	14comp		15	15comp			average
		1	1.915	178.085		8.13	171.87		6.112	173.888		5.369	174.631		3.038	176.962		5.134	174.866		1.248	178.752		1.685	178.315		3.779	176.221		5.6	174.4		2.609	177.391		2.42	177.58		3.861	176.139		3.091	176.909		3.722	176.278			176.152
		2	1.915	178.085		19.983	160.017		7.458	172.542		5.369	174.631		3.038	176.962		5.134	174.866		11.068	168.932		1.685	178.315		3.779	176.221		5.6	174.4		2.609	177.391		17.447	162.553		6.234	173.766		6.995	173.005		5.455	174.545			173.082
		3	1.915	178.085		43.531	136.469		15.156	164.844		15.171	164.829		21.59	158.41		5.134	174.866		48.87	131.13		7.595	172.405		8.403	171.597		8.973	171.027		11.07	168.93		27.708	152.292		21.812	158.188		20.726	159.274		8.577	171.423			162.251
		4	20.138	159.862		80.569	99.431		124.051	55.949		28.77	151.23		99.984	80.016		18.339	161.661		91.603	88.397		36.027	143.973		39.289	140.711		39.601	140.399		13.68	166.32		34.289	145.711		63.745	116.255		45	135		60.796	119.204			126.941
		5	38.544	141.456		131.781	48.219		144.593	35.407		117.501	62.499		106.144	73.856		26.187	153.813		73.443	106.557		23.668	156.332		63.625	116.375		39.601	140.399		29.606	150.394		46.136	133.864		99.751	80.249		44.611	135.389		56.344	123.656			110.564
		6	101.68	78.32		145	35		133.737	46.263		126.87	53.13		98.846	81.154		120.964	59.036		117.329	62.671		23.668	156.332		109.116	70.884		138.18	41.82		84.196	95.804		47.944	132.056		99.751	80.249		70.004	109.996		71.311	108.689			80.7603
		7	131.491	48.509		145	35		161.482	18.518		107.819	72.181		90.423	89.577		126.87	53.13		147.995	32.005		35.751	144.249		120.038	59.962		157.249	22.751		93.3	86.7		75.495	104.505		101.744	78.256		93.727	86.273		78.436	101.564			68.8787
		8	131.491	48.509		165.027	14.973		177.537	2.463		115.925	64.075		91.288	88.712		130.135	49.865		161.761	18.239		67.675	112.325		135.119	44.881		159.753	20.247		114.761	65.239		101.124	78.876		151.228	28.772		111.435	68.565		77.493	102.507			53.8832
		9	148.755	31.245		171.147	8.853		177.537	2.463		103.298	76.702		86.439	93.561		155.376	24.624		167.171	12.829		101.195	78.805		160.073	19.927		169.174	10.826		142.155	37.845		140.261	39.739		156.371	23.629		152.286	27.714		93.366	86.634			38.3597
		10	162.537	17.463		171.147	8.853		178.946	1.054		116.002	63.998		101.95	78.05		166.289	13.711		165.419	14.581		113.715	66.285		164.381	15.619		167.005	12.995		149.197	30.803		143.13	36.87		168.786	11.214		172.918	7.082		111.654	68.346			29.7949
		11	162.537	17.463		168.643	11.357		178.946	1.054		116.002	63.998		114.741	65.259		174.644	5.356		173.721	6.279		149.528	30.472		174.089	5.911		167.8	12.2		149.197	30.803		138.099	41.901		172.484	7.516		178.059	1.941		119.079	60.921			24.1621
		12	144.657	35.343		168.643	11.357		174.102	5.898		118.692	61.308		133.315	46.685		174.644	5.356		173.721	6.279		162.411	17.589		174.089	5.911		167.8	12.2		149.197	30.803		146.229	33.771		171.392	8.608		178.059	1.941		128.806	51.194			22.2829
		13	144.657	35.343		168.643	11.357		174.472	5.528		118.692	61.308		149.31	30.69		168.862	11.138		175.236	4.764		173.401	6.599		178.172	1.828		169.571	10.429		167.002	12.998		154.599	25.401		179.82	0.18		178.059	1.941		136.45	43.55			17.5369
		14	144.657	35.343		173.178	6.822		174.472	5.528		118.142	61.858		155.236	24.764		168.862	11.138		179.462	0.538		173.401	6.599		178.172	1.828		171.988	8.012		166.866	13.134		146.761	33.239		178.311	1.689		178.059	1.941		141.888	38.112			16.703
		15	151.512	28.488		169.92	10.08		174.472	5.528		118.142	61.858		155.236	24.764		168.862	11.138		179.462	0.538		173.401	6.599		179.344	0.656		171.988	8.012		166.866	13.134		146.761	33.239		178.311	1.689		178.059	1.941		141.888	38.112			16.3851
		16	151.512	28.488		178.199	1.801		174.472	5.528		118.142	61.858		155.236	24.764		168.862	11.138		179.462	0.538		173.401	6.599		179.344	0.656		171.988	8.012		166.866	13.134		160.615	19.385		178.311	1.689		178.059	1.941		141.888	38.112			14.9095
		17	151.512	28.488		176.927	3.073		175.84	4.16		130.236	49.764		171.741	8.259		168.862	11.138		175.415	4.585		171.901	8.099		179.344	0.656		175.45	4.55		174.177	5.823		160.615	19.385		180	0		178.059	1.941		157.971	22.029			11.4633
		18	154.058	25.942		176.927	3.073		175.84	4.16		130.236	49.764		165.276	14.724		170.557	9.443		178.423	1.577		176.147	3.853		179.384	0.616		175.45	4.55		174.177	5.823		175.428	4.572		180	0		178.315	1.685		163.748	16.252			9.7356
		19	161.896	18.104		176.927	3.073		175.84	4.16		133.446	46.554		164.932	15.068		170.557	9.443		178.423	1.577		176.147	3.853		179.384	0.616		175.45	4.55		178.127	1.873		178.159	1.841		180	0		176.201	3.799		163.748	16.252			8.71753
		20	162.962	17.038		176.927	3.073		175.84	4.16		133.446	46.554		164.932	15.068		170.557	9.443		178.423	1.577		179.861	0.139		179.384	0.616		173.311	6.689		175.374	4.626		178.159	1.841		178.615	1.385		176.201	3.799		167.171	12.829			8.58913
		21	167.56	12.44		175.79	4.21		179.843	0.157		133.446	46.554		170.293	9.707		175.958	4.042		178.423	1.577		179.861	0.139		179.384	0.616		174.401	5.599		178.517	1.483		177.133	2.867		178.615	1.385		176.934	3.066		166.357	13.643			7.16567
		22	163.07	16.93		173.48	6.52		179.843	0.157		137.408	42.592		170.293	9.707		175.958	4.042		178.423	1.577		179.861	0.139		178.74	1.26		174.774	5.226		178.517	1.483		177.133	2.867		176.372	3.628		176.934	3.066		166.357	13.643			7.52247
		23	163.07	16.93		173.48	6.52		173.748	6.252		148.504	31.496		176.942	3.058		175.958	4.042		178.906	1.094		179.861	0.139		178.74	1.26		174.774	5.226		178.517	1.483		176.906	3.094		179.959	0.041		174.179	5.821		166.357	13.643			6.67327
		24	159.71	20.29		175.003	4.997		173.748	6.252		148.504	31.496		176.942	3.058		179.329	0.671		178.906	1.094		179.861	0.139		178.205	1.795		174.774	5.226		178.517	1.483		176.906	3.094		179.959	0.041		176.89	3.11		166.357	13.643			6.42593
		25	159.71	20.29		175.14	4.86		173.748	6.252		155.2	24.8		177.284	2.716		179.329	0.671		178.906	1.094		179.843	0.157		178.205	1.795		174.774	5.226		178.517	1.483		176.906	3.094		179.959	0.041		176.89	3.11		174.122	5.878			5.43113
		26	162.646	17.354		175.14	4.86		179.318	0.682		155.83	24.17		177.284	2.716		179.329	0.671		178.906	1.094		179.843	0.157		177.13	2.87		170.34	9.66		178.517	1.483		176.906	3.094		179.959	0.041		179.091	0.909		174.122	5.878			5.0426
		27	162.646	17.354		175.14	4.86		178.753	1.247		157.293	22.707		177.284	2.716		179.168	0.832		178.906	1.094		179.843	0.157		177.13	2.87		178.047	1.953		173.509	6.491		176.906	3.094		177.505	2.495		179.091	0.909		175.721	4.279			4.87053
		28	164.892	15.108		175.14	4.86		178.753	1.247		156.644	23.356		163.67	16.33		179.168	0.832		178.906	1.094		179.843	0.157		177.13	2.87		178.047	1.953		177.406	2.594		176.906	3.094		177.505	2.495		179.091	0.909		175.721	4.279			5.41187
		29	171.699	8.301		175.14	4.86		172.535	7.465		162.313	17.687		179.72	0.28		179.168	0.832		178.906	1.094		173.66	6.34		177.13	2.87		178.047	1.953		177.406	2.594		176.906	3.094		178.222	1.778		179.854	0.146		174.237	5.763			4.33713
		30	174.182	5.818		175.14	4.86		176.128	3.872		167.905	12.095		179.72	0.28		179.168	0.832		178.906	1.094		178.654	1.346		177.13	2.87		178.047	1.953		177.406	2.594		176.533	3.467		178.222	1.778		179.854	0.146		174.237	5.763			3.2512
		line	gh3.3,5,6
		treatment
			1	1comp		2	2comp		3	3comp		4	4comp		5	5comp		6	6comp		7	7comp		8	8comp		9	9comp		10	10comp		11	11comp		12	12comp		13	13comp		14	14comp		15	15comp			average
		1	2.867	177.133		0.984	179.016		4.206	175.794		3.585	176.415		3.783	176.217		2.1	177.9		5.699	174.301		4.709	175.291		0.604	179.396		1.525	178.475		5.906	174.094		2.853	177.147		0.216	179.784		3.621	176.379		5.29	174.71			176.803
		2	2.867	177.133		0.984	179.016		4.206	175.794		3.585	176.415		7.125	172.875		2.1	177.9		5.699	174.301		4.709	175.291		6.189	173.811		16.005	163.995		5.906	174.094		2.853	177.147		6.176	173.824		2.131	177.869		12.039	167.961			174.495
		3	4.977	175.023		8.601	171.399		15.376	164.624		9.095	170.905		19.152	160.848		13.809	166.191		21.353	158.647		25.334	154.666		6.189	173.811		11.04	168.96		10.607	169.393		15.245	164.755		28.54	151.46		15.125	164.875		17.554	162.446			165.2
		4	15.621	164.379		26.802	153.198		26.159	153.841		25.649	154.351		47.114	132.886		23.626	156.374		34.45	145.55		30.241	149.759		32.005	147.995		61.274	118.726		14.187	165.813		33.954	146.046		36.041	143.959		15.125	164.875		104.729	75.271			144.868
		5	19.334	160.666		66.406	113.594		30.243	149.757		43.636	136.364		32.852	147.148		57.525	122.475		68.694	111.306		80.463	99.537		128.66	51.34		61.274	118.726		32.266	147.734		33.954	146.046		63.164	116.836		16.258	163.742		110.596	69.404			123.645
		6	49.44	130.56		54.782	125.218		52.523	127.477		64.026	115.974		17.879	162.121		89.068	90.932		91.941	88.059		137.192	42.808		127.794	52.206		74.472	105.528		41.301	138.699		33.954	146.046		65.832	114.168		29.427	150.573		150.422	29.578			107.996
		7	49.125	130.875		79.38	100.62		83.884	96.116		71.854	108.146		39.163	140.837		87.764	92.236		106.948	73.052		156.441	23.559		108.104	71.896		73.61	106.39		35.064	144.936		29.126	150.874		63.108	116.892		46.716	133.284		175.601	4.399			99.6075
		8	36.358	143.642		92.01	87.99		83.197	96.803		57.696	122.304		32.279	147.721		90.198	89.802		126.547	53.453		169.715	10.285		105.037	74.963		110.225	69.775		48.846	131.154		25.613	154.387		63.108	116.892		52.952	127.048		177.192	2.808			95.2685
		9	65.41	114.59		153.355	26.645		114.417	65.583		89.867	90.133		109.642	70.358		174.077	5.923		164.383	15.617		173.737	6.263		159.528	20.472		175.105	4.895		47.989	132.011		27.508	152.492		91.618	88.382		77.49	102.51		177.192	2.808			59.9121
		10	71.642	108.358		155.235	24.765		114.417	65.583		119.655	60.345		96.453	83.547		178.971	1.029		165.11	14.89		176.024	3.976		159.528	20.472		175.105	4.895		42.466	137.534		49.482	130.518		95.939	84.061		111.595	68.405		171.167	8.833			54.4807
		11	71.642	108.358		155.235	24.765		145.837	34.163		152.489	27.511		123.338	56.662		173.641	6.359		177.021	2.979		176.024	3.976		180	0		159.24	20.76		58.886	121.114		80.272	99.728		106.844	73.156		112.611	67.389		171.167	8.833			43.7169
		12	86.778	93.222		155.235	24.765		159.697	20.303		163.443	16.557		151.445	28.555		177.803	2.197		177.021	2.979		179.058	0.942		180	0		158.07	21.93		74.389	105.611		99.501	80.499		106.844	73.156		112.611	67.389		161.481	18.519			37.1083
		13	91.78	88.22		157.813	22.187		159.697	20.303		155.769	24.231		146.952	33.048		177.803	2.197		175.601	4.399		179.058	0.942		180	0		156.654	23.346		86.583	93.417		145.376	34.624		135.073	44.927		119.454	60.546		178.731	1.269			30.2437
		14	91.78	88.22		170.608	9.392		153.779	26.221		155.769	24.231		146.952	33.048		177.803	2.197		175.601	4.399		179.058	0.942		180	0		156.654	23.346		117.35	62.65		160.145	19.855		147.285	32.715		132.51	47.49		178.731	1.269			25.065
		15	121.741	58.259		166.063	13.937		145.105	34.895		159.431	20.569		164.456	15.544		175.44	4.56		175.601	4.399		175.396	4.604		180	0		156.654	23.346		120.713	59.287		173.66	6.34		146.999	33.001		144.334	35.666		179.54	0.46			20.9911
		16	96.999	83.001		178.186	1.814		151.793	28.207		159.431	20.569		164.456	15.544		175.44	4.56		175.601	4.399		175.277	4.723		170.724	9.276		156.654	23.346		137.057	42.943		173.66	6.34		146.999	33.001		144.334	35.666		179.54	0.46			20.9233
		17	174.231	5.769		173.552	6.448		164.152	15.848		159.431	20.569		164.456	15.544		175.44	4.56		173.912	6.088		163.744	16.256		158.884	21.116		172.308	7.692		144.537	35.463		177.797	2.203		153.239	26.761		144.334	35.666		178.032	1.968			14.7967
		18	173.959	6.041		173.552	6.448		164.152	15.848		162.369	17.631		164.932	15.068		175.44	4.56		173.912	6.088		163.744	16.256		163.82	16.18		163.072	16.928		159.233	20.767		177.797	2.203		153.239	26.761		145.658	34.342		178.032	1.968			13.8059
		19	173.959	6.041		175.997	4.003		164.152	15.848		171.407	8.593		162.621	17.379		175.44	4.56		173.912	6.088		180	0		155.566	24.434		174.452	5.548		154.735	25.265		177.797	2.203		153.287	26.713		145.658	34.342		178.032	1.968			12.199
		20	173.959	6.041		175.997	4.003		164.152	15.848		171.407	8.593		162.621	17.379		175.44	4.56		170.41	9.59		180	0		177.797	2.203		179.539	0.461		160.288	19.712		179.82	0.18		153.287	26.713		146.724	33.276		168.743	11.257			10.6544
		21	177.602	2.398		175.997	4.003		161.846	18.154		172.628	7.372		165.4	14.6		176.689	3.311		170.41	9.59		175.781	4.219		177.963	2.037		179.539	0.461		160.288	19.712		179.82	0.18		166.498	13.502		146.724	33.276		175.83	4.17			9.13233
		22	177.602	2.398		175.997	4.003		161.846	18.154		172.628	7.372		161.693	18.307		176.689	3.311		177.949	2.051		175.781	4.219		179.23	0.77		179.539	0.461		159.071	20.929		175.025	4.975		167.835	12.165		146.724	33.276		173.816	6.184			9.23833
		23	175.255	4.745		175.997	4.003		167.471	12.529		172.628	7.372		155.095	24.905		176.689	3.311		177.949	2.051		180	0		179.23	0.77		179.539	0.461		173.005	6.995		175.496	4.504		167.835	12.165		162.766	17.234		163.514	16.486			7.8354
		24	178.864	1.136		175.997	4.003		167.471	12.529		172.556	7.444		155.095	24.905		176.689	3.311		177.949	2.051		180	0		179.23	0.77		179.539	0.461		173.005	6.995		173.95	6.05		168.476	11.524		162.766	17.234		165.634	14.366			7.5186
		25	178.864	1.136		175.842	4.158		167.471	12.529		172.556	7.444		163.482	16.518		176.689	3.311		177.949	2.051		176.014	3.986		178.234	1.766		180	0		179.684	0.316		176.06	3.94		168.548	11.452		162.766	17.234		164.932	15.068			6.72727
		26	173.589	6.411		175.842	4.158		167.471	12.529		172.556	7.444		163.482	16.518		176.689	3.311		174.801	5.199		176.014	3.986		179.899	0.101		180	0		179.684	0.316		177.295	2.705		175.387	4.613		163.443	16.557		170.232	9.768			6.24107
		27	178.374	1.626		175.842	4.158		167.471	12.529		176.499	3.501		173.766	6.234		176.689	3.311		174.801	5.199		176.014	3.986		177.726	2.274		180	0		177.817	2.183		175.789	4.211		175.387	4.613		168.439	11.561		166.208	13.792			5.27853
		28	178.374	1.626		175.842	4.158		167.471	12.529		176.499	3.501		173.766	6.234		176.689	3.311		178.409	1.591		172.207	7.793		176.067	3.933		180	0		177.817	2.183		172.294	7.706		175.387	4.613		168.439	11.561		166.208	13.792			5.6354
		29	178.374	1.626		175.842	4.158		167.471	12.529		178.279	1.721		170.729	9.271		176.689	3.311		176.778	3.222		172.207	7.793		176.067	3.933		180	0		173.404	6.596		178.009	1.991		175.504	4.496		159.72	20.28		172.594	7.406			5.88887
		30	178.374	1.626		175.842	4.158		168.309	11.691		176.767	3.233		170.729	9.271		176.689	3.311		176.778	3.222		172.207	7.793		178.004	1.996		180	0		171.956	8.044		178.748	1.252		175.504	4.496		166.028	13.972		172.594	7.406			5.4314
20190325
		line	WT
		treatment
			1	1comp		2	2comp		3	3comp		4	4comp		5	5comp		6	6comp		7	7comp		8	8comp		9	9comp		10	10comp		11	11comp		12	12comp		13	13comp		14	14comp		15	15comp			average
		1	1.909	178.091		2.453	177.547		1.212	178.788		5.241	174.759		2.397	177.603		1.897	178.103		3.626	176.374		1.848	178.152		3.593	176.407		1.848	178.152		1.989	178.011		0.797	179.203		1.164	178.836		1.7	178.3		4.485	175.515			177.589
		2	5.43	174.57		4.802	175.198		1.212	178.788		5.241	174.759		4.699	175.301		5.673	174.327		3.626	176.374		3.319	176.681		3.593	176.407		1.848	178.152		3.645	176.355		0.797	179.203		4.074	175.926		3.907	176.093		10.305	169.695			175.855
		3	11.512	168.488		4.802	175.198		9.335	170.665		18.519	161.481		9.765	170.235		8.593	171.407		4.834	175.166		4.51	175.49		5.363	174.637		5.921	174.079		3.645	176.355		3.205	176.795		4.074	175.926		6.183	173.817		10.305	169.695			172.629
		4	14.184	165.816		15.117	164.883		13.165	166.835		28.61	151.39		35.568	144.432		18.91	161.09		4.834	175.166		106.504	73.496		5.363	174.637		5.921	174.079		29.872	150.128		38.355	141.645		6.515	173.485		20.914	159.086		9.924	170.076			156.416
		5	21.953	158.047		25.652	154.348		13.165	166.835		42.647	137.353		101.1	78.9		84.249	95.751		24.206	155.794		152.319	27.681		13.585	166.415		70.806	109.194		70.295	109.705		92.887	87.113		6.515	173.485		43.822	136.178		29.192	150.808			127.174
		6	49.552	130.448		24.495	155.505		48.836	131.164		42.647	137.353		101.1	78.9		90.476	89.524		81.482	98.518		158.839	21.161		24.075	155.925		91.428	88.572		81.404	98.596		123.88	56.12		19.2	160.8		60.524	119.476		29.192	150.808			111.525
		7	64.281	115.719		24.495	155.505		71.533	108.467		59.123	120.877		103.726	76.274		141.705	38.295		108.435	71.565		158.839	21.161		30.158	149.842		106.735	73.265		96.818	83.182		138.614	41.386		33.495	146.505		71.702	108.298		29.932	150.068			97.3606
		8	96.189	83.811		38.532	141.468		121.654	58.346		88.091	91.909		115.432	64.568		165.964	14.036		130.214	49.786		175.4	4.6		60.945	119.055		121.21	58.79		112.834	67.166		143.616	36.384		69.162	110.838		81.048	98.952		56.61	123.39			74.8733
		9	99.819	80.181		38.532	141.468		125.538	54.462		111.801	68.199		115.611	64.389		153.435	26.565		143.249	36.751		173.779	6.221		69.465	110.535		146.31	33.69		136.014	43.986		143.616	36.384		100.061	79.939		112.268	67.732		86.532	93.468			62.9313
		10	99.819	80.181		47.521	132.479		139.802	40.198		135	45		115.611	64.389		166.121	13.879		141.953	38.047		154.142	25.858		84.56	95.44		168.135	11.865		137.121	42.879		141.762	38.238		168.896	11.104		130.726	49.274		147.55	32.45			48.0854
		11	109.477	70.523		47.521	132.479		123.93	56.07		135	45		131.263	48.737		177.203	2.797		141.953	38.047		159.852	20.148		121.088	58.912		168.135	11.865		118.918	61.082		141.762	38.238		168.896	11.104		150.54	29.46		164.364	15.636			42.6732
		12	124.597	55.403		51.126	128.874		123.93	56.07		155.821	24.179		146.229	33.771		177.203	2.797		172.163	7.837		158.009	21.991		135.522	44.478		178.21	1.79		135	45		148.219	31.781		178.152	1.848		150.54	29.46		164.364	15.636			33.3943
		13	124.597	55.403		51.126	128.874		133.866	46.134		155.821	24.179		157.188	22.812		164.262	15.738		175.29	4.71		159.075	20.925		133.161	46.839		171.392	8.608		133.025	46.975		160.436	19.564		178.152	1.848		175.329	4.671		161.509	18.491			31.0514
		14	135.187	44.813		79.363	100.637		133.866	46.134		155.821	24.179		157.188	22.812		161.075	18.925		173.561	6.439		178.091	1.909		141.843	38.157		167.661	12.339		151.858	28.142		167.648	12.352		161.565	18.435		172.655	7.345		169.667	10.333			26.1967
		15	134.566	45.434		83.48	96.52		144.335	35.665		168.69	11.31		174.596	5.404		161.075	18.925		169.274	10.726		178.091	1.909		145.62	34.38		168.69	11.31		151.858	28.142		172.917	7.083		166.759	13.241		172.655	7.345		176.634	3.366			22.0507
		16	134.566	45.434		164.745	15.255		144.335	35.665		160.787	19.213		178.353	1.647		159.435	20.565		173.027	6.973		179.117	0.883		149.226	30.774		168.69	11.31		151.858	28.142		172.917	7.083		164.745	15.255		175.798	4.202		177.691	2.309			16.314
		17	139.399	40.601		164.745	15.255		144.335	35.665		176.035	3.965		178.353	1.647		159.435	20.565		174.32	5.68		179.117	0.883		153.765	26.235		162.464	17.536		165.486	14.514		172.377	7.623		163.142	16.858		168.207	11.793		177.691	2.309			14.7419
		18	139.399	40.601		159.806	20.194		148.278	31.722		176.035	3.965		165.964	14.036		168.411	11.589		174.32	5.68		179.525	0.475		153.765	26.235		169.001	10.999		165.486	14.514		172.377	7.623		165.964	14.036		168.207	11.793		168.087	11.913			15.025
		19	148.031	31.969		167.949	12.051		159.465	20.535		176.035	3.965		172.482	7.518		168.411	11.589		167.16	12.84		168.461	11.539		151.054	28.946		169.001	10.999		162.232	17.768		170.286	9.714		165.964	14.036		173.845	6.155		168.461	11.539			14.0775
		20	148.031	31.969		167.949	12.051		159.465	20.535		176.035	3.965		172.482	7.518		168.411	11.589		178.817	1.183		172.614	7.386		167.948	12.052		169.001	10.999		166.264	13.736		170.286	9.714		176.837	3.163		172.158	7.842		179.284	0.716			10.2945
		21	157.061	22.939		169.715	10.285		174.759	5.241		173.915	6.085		172.482	7.518		162.121	17.879		178.817	1.183		172.614	7.386		159.794	20.206		166.809	13.191		178.801	1.199		170.286	9.714		176.055	3.945		171.263	8.737		179.284	0.716			9.0816
		22	152.103	27.897		170.735	9.265		174.759	5.241		173.915	6.085		171.133	8.867		170.508	9.492		171.486	8.514		177.026	2.974		168.175	11.825		160.346	19.654		178.801	1.199		170.286	9.714		176.055	3.945		171.263	8.737		179.284	0.716			8.94167
		23	163.626	16.374		170.735	9.265		173.215	6.785		173.915	6.085		176.07	3.93		170.508	9.492		171.486	8.514		177.026	2.974		165.398	14.602		160.346	19.654		176.796	3.204		174.094	5.906		176.055	3.945		171.263	8.737		179.284	0.716			8.0122
		24	155.989	24.011		165.828	14.172		173.215	6.785		179.848	0.152		172.248	7.752		170.508	9.492		175.191	4.809		177.605	2.395		170.486	9.514		176.694	3.306		176.796	3.204		174.094	5.906		179.356	0.644		171.263	8.737		179.284	0.716			6.773
		25	160.218	19.782		165.828	14.172		176.557	3.443		179.848	0.152		178.334	1.666		170.134	9.866		175.191	4.809		174.062	5.938		167.039	12.961		176.694	3.306		177.274	2.726		172.875	7.125		178.397	1.603		173.137	6.863		179.284	0.716			6.34187
		26	166.608	13.392		176.424	3.576		176.557	3.443		179.848	0.152		178.334	1.666		170.134	9.866		175.135	4.865		174.382	5.618		172.818	7.182		178.995	1.005		177.274	2.726		172.875	7.125		178.397	1.603		173.137	6.863		179.284	0.716			4.6532
		27	166.608	13.392		170.642	9.358		174.005	5.995		179.848	0.152		176.832	3.168		169.188	10.812		175.135	4.865		178.781	1.219		169.234	10.766		178.995	1.005		178.998	1.002		166.208	13.792		172.168	7.832		170.407	9.593		179.284	0.716			6.24447
		28	178.739	1.261		170.642	9.358		174.005	5.995		179.848	0.152		173.44	6.56		169.188	10.812		177.207	2.793		178.781	1.219		173.871	6.129		177.117	2.883		178.998	1.002		162.917	17.083		177.629	2.371		170.407	9.593		168.04	11.96			5.94473
		29	178.739	1.261		165.129	14.871		172.381	7.619		175.301	4.699		173.44	6.56		173.921	6.079		177.207	2.793		175.167	4.833		173.871	6.129		177.117	2.883		178.998	1.002		162.917	17.083		177.629	2.371		170.407	9.593		174.144	5.856			6.24213
		30	178.739	1.261		165.129	14.871		172.381	7.619		175.301	4.699		173.44	6.56		173.921	6.079		177.928	2.072		179.635	0.365		173.871	6.129		177.117	2.883		178.998	1.002		163.626	16.374		177.629	2.371		170.407	9.593		174.144	5.856			5.84893
		line	gh3.3,5,6
		treatment
			1	1comp		2	2comp		3	3comp		4	4comp		5	5comp		6	6comp		7	7comp		8	8comp		9	9comp		10	10comp		11	11comp		12	12comp		13	13comp		14	14comp		15	15comp			average
		1	3.504	176.496		3.65	176.35		2.62	177.38		4.934	175.066		2.397	177.603		2.35	177.65		3.366	176.634		3.105	176.895		3.576	176.424		3.535	176.465		2.372	177.628		3.783	176.217		2.753	177.247		2.121	177.879		2.531	177.469			176.894
		2	3.504	176.496		3.65	176.35		2.62	177.38		4.934	175.066		4.623	175.377		2.35	177.65		3.366	176.634		3.105	176.895		3.576	176.424		9.156	170.844		2.372	177.628		5.711	174.289		3.504	176.496		2.121	177.879		2.531	177.469			176.192
		3	4.082	175.918		11.428	168.572		9.211	170.789		7.668	172.332		4.623	175.377		4.308	175.692		12.956	167.044		19.182	160.818		21.501	158.499		27.001	152.999		9.392	170.608		12.63	167.37		8.184	171.816		7.72	172.28		8.027	171.973			168.806
		4	8.307	171.693		11.428	168.572		9.211	170.789		31.264	148.736		14.436	165.564		9.273	170.727		35.319	144.681		19.182	160.818		99.707	80.293		45.647	134.353		9.392	170.608		26.842	153.158		8.184	171.816		19.202	160.798		25.032	154.968			155.172
		5	8.307	171.693		11.428	168.572		9.211	170.789		46.029	133.971		67.38	112.62		42.125	137.875		60.781	119.219		34.046	145.954		82.535	97.465		50.5	129.5		14.316	165.684		25.241	154.759		28.824	151.176		27.69	152.31		30.785	149.215			144.053
		6	29.79	150.21		24.393	155.607		24.367	155.633		99.572	80.428		95.793	84.207		77.471	102.529		98.203	81.797		34.046	145.954		85.03	94.97		50.5	129.5		19.481	160.519		63.385	116.615		30.985	149.015		25.679	154.321		42.176	137.824			126.609
		7	72.376	107.624		24.393	155.607		36.128	143.872		130.619	49.381		114.437	65.563		84.202	95.798		120.127	59.873		34.046	145.954		74.092	105.908		70.393	109.607		43.093	136.907		93.434	86.566		27.723	152.277		34.413	145.587		42.176	137.824			113.223
		8	93.691	86.309		24.393	155.607		51.38	128.62		154.42	25.58		113.996	66.004		94.035	85.965		124.563	55.437		25.45	154.55		80.131	99.869		64.664	115.336		73.057	106.943		175.301	4.699		27.723	152.277		34.413	145.587		39.848	140.152			101.529
		9	111.997	68.003		27.824	152.176		69.502	110.498		178.659	1.341		119.045	60.955		119.442	60.558		143.099	36.901		25.45	154.55		95.109	84.891		77.349	102.651		73.057	106.943		138.991	41.009		46.548	133.452		41.073	138.927		76.346	103.654			90.4339
		10	117.108	62.892		35.089	144.911		69.502	110.498		166.014	13.986		133.999	46.001		130.389	49.611		133.798	46.202		33.762	146.238		99.462	80.538		135.598	44.402		124.574	55.426		141.733	38.267		57.207	122.793		39.053	140.947		100.163	79.837			78.8366
		11	117.108	62.892		35.089	144.911		71.653	108.347		158.583	21.417		133.999	46.001		136.718	43.282		120.482	59.518		33.762	146.238		110.132	69.868		179.786	0.214		164.271	15.729		141.733	38.267		57.207	122.793		71.635	108.365		125.455	54.545			69.4925
		12	128.418	51.582		62.624	117.376		71.653	108.347		169.38	10.62		145.694	34.306		142.275	37.725		120.482	59.518		146.505	33.495		127.235	52.765		163.75	16.25		164.47	15.53		149.25	30.75		66.31	113.69		81.674	98.326		156.306	23.694			53.5983
		13	136.536	43.464		109.983	70.017		82.63	97.37		169.393	10.607		147.272	32.728		130.391	49.609		142.586	37.414		147.597	32.403		127.235	52.765		155.331	24.669		164.47	15.53		149.25	30.75		70.672	109.328		78.69	101.31		159.444	20.556			48.568
		14	138.18	41.82		101.677	78.323		82.63	97.37		169.393	10.607		163.301	16.699		130.391	49.609		142.586	37.414		147.597	32.403		135	45		151.928	28.072		164.47	15.53		130.815	49.185		75.421	104.579		78.69	101.31		164.476	15.524			48.2297
		15	138.18	41.82		138.558	41.442		82.63	97.37		169.393	10.607		177.295	2.705		138.108	41.892		142.586	37.414		142.414	37.586		145.62	34.38		154.234	25.766		166.657	13.343		130.815	49.185		90.04	89.96		78.69	101.31		167.746	12.254			42.4689
		16	137.199	42.801		138.558	41.442		82.63	97.37		176.114	3.886		177.295	2.705		142.101	37.899		156.656	23.344		142.414	37.586		145.62	34.38		145.659	34.341		166.657	13.343		160.56	19.44		97.274	82.726		107.985	72.015		167.746	12.254			37.0355
		17	137.199	42.801		138.558	41.442		82.63	97.37		176.114	3.886		175.433	4.567		142.101	37.899		156.656	23.344		142.414	37.586		162.474	17.526		145.659	34.341		163.926	16.074		162.681	17.319		100.305	79.695		107.985	72.015		173.146	6.854			35.5146
		18	142.96	37.04		155.618	24.382		90.612	89.388		176.114	3.886		175.433	4.567		142.101	37.899		162.683	17.317		172.401	7.599		169.992	10.008		157.297	22.703		163.926	16.074		162.116	17.884		113.589	66.411		128.66	51.34		173.146	6.854			27.5568
		19	144.779	35.221		160.755	19.245		106.769	73.231		176.114	3.886		179.605	0.395		142.101	37.899		170.293	9.707		172.401	7.599		176.702	3.298		153.079	26.921		169.695	10.305		171.027	8.973		146.8	33.2		168.096	11.904		173.418	6.582			19.2244
		20	142.773	37.227		163.216	16.784		112.479	67.521		176.114	3.886		179.605	0.395		156.126	23.874		168.284	11.716		172.401	7.599		176.702	3.298		165.21	14.79		169.695	10.305		171.027	8.973		146.8	33.2		169.154	10.846		173.418	6.582			17.1331
		21	145.376	34.624		166.339	13.661		119.281	60.719		176.114	3.886		179.605	0.395		163.673	16.327		174.768	5.232		174.866	5.134		176.702	3.298		153.677	26.323		169.695	10.305		171.027	8.973		148.579	31.421		169.154	10.846		171.91	8.09			15.9489
		22	154.654	25.346		166.339	13.661		124.395	55.605		176.114	3.886		179.605	0.395		163.673	16.327		174.768	5.232		174.866	5.134		176.702	3.298		164.922	15.078		172.304	7.696		171.85	8.15		157.751	22.249		169.154	10.846		171.832	8.168			13.4047
		23	154.654	25.346		166.339	13.661		124.395	55.605		176.114	3.886		176.736	3.264		173.884	6.116		169.133	10.867		174.866	5.134		176.702	3.298		164.922	15.078		172.304	7.696		171.85	8.15		162.919	17.081		173.243	6.757		171.832	8.168			12.6738
		24	154.654	25.346		172.326	7.674		130.914	49.086		179.976	0.024		178.904	1.096		177.274	2.726		169.133	10.867		173.072	6.928		169.593	10.407		172.965	7.035		178.781	1.219		173.55	6.45		162.919	17.081		173.243	6.757		173.89	6.11			10.5871
		25	179.376	0.624		172.326	7.674		171.55	8.45		177.684	2.316		177.512	2.488		179.246	0.754		171.611	8.389		174.278	5.722		174.135	5.865		171.757	8.243		178.781	1.219		173.55	6.45		168.339	11.661		178.287	1.713		174.819	5.181			5.1166
		26	179.376	0.624		172.55	7.45		172.111	7.889		177.684	2.316		177.512	2.488		179.246	0.754		171.611	8.389		175.432	4.568		174.135	5.865		171.757	8.243		178.781	1.219		178.467	1.533		168.339	11.661		178.287	1.713		174.819	5.181			4.65953
		27	179.376	0.624		172.55	7.45		172.111	7.889		177.684	2.316		177.512	2.488		179.246	0.754		170.134	9.866		175.437	4.563		172.054	7.946		170.66	9.34		174.781	5.219		178.467	1.533		177.51	2.49		177.709	2.291		174.819	5.181			4.66333
		28	176.882	3.118		172.55	7.45		172.111	7.889		179.686	0.314		179.432	0.568		179.151	0.849		170.134	9.866		175.437	4.563		179.024	0.976		170.66	9.34		174.781	5.219		178.467	1.533		177.51	2.49		177.709	2.291		171.433	8.567			4.33553
		29	179.369	0.631		169.002	10.998		172.111	7.889		179.686	0.314		179.432	0.568		179.151	0.849		175.571	4.429		178.874	1.126		179.024	0.976		167.709	12.291		172.951	7.049		178.467	1.533		177.51	2.49		177.709	2.291		174.41	5.59			3.93493
		30	179.369	0.631		169.002	10.998		169.411	10.589		179.686	0.314		178.763	1.237		179.151	0.849		175.571	4.429		178.874	1.126		179.024	0.976		167.709	12.291		172.951	7.049		178.467	1.533		177.51	2.49		173.511	6.489		174.718	5.282			4.41887
20190712
		line	Col-0-WT
		treatment
			1	1comp		2	2comp		3	3comp		4	4comp		5	5comp		6	6comp		7	7comp		8	8comp		9	9comp		10	10comp		11	11comp		12	12comp		13	13comp		14	14comp		15	15comp			average
		1	3.465	176.535		4.869	175.131		3.991	176.009		3.986	176.014		6.827	173.173		2.538	177.462		3.366	176.634		2.95	177.05		5.77	174.23		5.657	174.343		4.383	175.617		3.576	176.424		3.545	176.455		4.616	175.384		3.806	176.194			175.777
		2	3.465	176.535		4.869	175.131		9.951	170.049		10.739	169.261		6.827	173.173		5.058	174.942		7.478	172.522		2.95	177.05		11.497	168.503		10.795	169.205		4.383	175.617		10.008	169.992		11.205	168.795		16.516	163.484		5.356	174.644			171.927
		3	55.168	124.832		12.158	167.842		57.304	122.696		10.739	169.261		10.855	169.145		10.561	169.439		15.644	164.356		20.45	159.55		7.537	172.463		28.476	151.524		24.702	155.298		17.723	162.277		99.09	80.91		52.125	127.875		31.888	148.112			149.705
		4	55.168	124.832		12.158	167.842		45.69	134.31		10.722	169.278		93.366	86.634		13.169	166.831		25.877	154.123		33.934	146.066		7.537	172.463		28.938	151.062		28.142	151.858		24.313	155.687		114.173	65.827		54.615	125.385		35.516	144.484			141.112
		5	51.699	128.301		8.18	171.82		45.69	134.31		23.385	156.615		103.57	76.43		60.461	119.539		25.877	154.123		73.693	106.307		13.123	166.877		21.801	158.199		38.48	141.52		24.313	155.687		133.363	46.637		54.615	125.385		29.81	150.19			132.796
		6	33.212	146.788		30.774	149.226		53.973	126.027		17.493	162.507		140.692	39.308		125.844	54.156		50.262	129.738		79.808	100.192		20.276	159.724		27.431	152.569		73.983	106.017		24.313	155.687		114.309	65.691		54.722	125.278		35.207	144.793			121.18
		7	44.157	135.843		31.239	148.761		80.042	99.958		16.633	163.367		147.4	32.6		107.103	72.897		50.262	129.738		126.793	53.207		30.629	149.371		33.307	146.693		98.13	81.87		26.511	153.489		114.309	65.691		48.757	131.243		49.361	130.639			113.024
		8	59.505	120.495		31.239	148.761		84.062	95.938		27.81	152.19		159.044	20.956		107.103	72.897		83.869	96.131		146.233	33.767		31.936	148.064		56.165	123.835		147.095	32.905		20.472	159.528		127.999	52.001		77.811	102.189		70.419	109.581			97.9492
		9	84.289	95.711		39.369	140.631		99.004	80.996		35.538	144.462		159.044	20.956		116.442	63.558		114.775	65.225		177.722	2.278		30.256	149.744		70.333	109.667		152.354	27.646		42.274	137.726		133.21	46.79		107.261	72.739		103.282	76.718			82.3231
		10	98.13	81.87		30.859	149.141		99.004	80.996		34.156	145.844		169.783	10.217		116.983	63.017		145.235	34.765		177.068	2.932		32.005	147.995		87.207	92.793		165.097	14.903		71.16	108.84		133.21	46.79		140.788	39.212		121.416	58.584			71.8599
		11	123.805	56.195		25.026	154.974		120.964	59.036		50.065	129.935		170.074	9.926		122.421	57.579		176.269	3.731		142.815	37.185		32.005	147.995		105.524	74.476		166.917	13.083		98.114	81.886		142.421	37.579		156.691	23.309		155.376	24.624			60.7675
		12	127.473	52.527		50.404	129.596		120.964	59.036		64.085	115.915		170.074	9.926		117.747	62.253		176.269	3.731		126.507	53.493		62.622	117.378		109.855	70.145		174.732	5.268		126.114	53.886		142.421	37.579		156.691	23.309		155.376	24.624			54.5777
		13	127.473	52.527		85.824	94.176		130.601	49.399		91.193	88.807		165.121	14.879		136.332	43.668		177.647	2.353		155.154	24.846		119.427	60.573		123.275	56.725		178.506	1.494		149.744	30.256		163.816	16.184		160.674	19.326		162.255	17.745			38.1972
		14	135	45		94.735	85.265		120.579	59.421		84.62	95.38		153.598	26.402		136.332	43.668		171.409	8.591		172.804	7.196		119.427	60.573		158.173	21.827		178.506	1.494		155.082	24.918		158.274	21.726		160.674	19.326		162.255	17.745			35.9021
		15	135	45		141.046	38.954		121.535	58.465		112.392	67.608		153.598	26.402		143.621	36.379		171.409	8.591		178.152	1.848		129.732	50.268		158.173	21.827		178.506	1.494		155.556	24.444		158.274	21.726		164.456	15.544		162.255	17.745			29.0863
		16	142.306	37.694		151.567	28.433		121.535	58.465		128.991	51.009		150.241	29.759		151.686	28.314		179.215	0.785		178.152	1.848		153.435	26.565		168.32	11.68		178.506	1.494		160.526	19.474		153.435	26.565		169.509	10.491		165.964	14.036			23.1075
		17	142.306	37.694		151.567	28.433		127.316	52.684		128.991	51.009		150.241	29.759		151.686	28.314		179.215	0.785		174.144	5.856		167.471	12.529		168.32	11.68		175.815	4.185		160.526	19.474		153.435	26.565		173.83	6.17		165.964	14.036			21.9449
		18	142.306	37.694		151.567	28.433		133.076	46.924		154.782	25.218		165.332	14.668		153.567	26.433		179.215	0.785		174.144	5.856		167.471	12.529		178.688	1.312		175.815	4.185		165.964	14.036		153.435	26.565		173.83	6.17		165.964	14.036			17.6563
		19	150.396	29.604		166.629	13.371		138.652	41.348		154.782	25.218		167.276	12.724		153.567	26.433		179.215	0.785		174.144	5.856		171.048	8.952		178.688	1.312		175.815	4.185		165.964	14.036		153.435	26.565		173.83	6.17		165.964	14.036			15.373
		20	157.122	22.878		170.838	9.162		138.652	41.348		154.782	25.218		171.085	8.915		161.167	18.833		179.215	0.785		159.624	20.376		171.048	8.952		175.535	4.465		175.815	4.185		165.964	14.036		153.435	26.565		173.934	6.066		165.964	14.036			15.0547
		21	157.122	22.878		170.838	9.162		138.652	41.348		156.801	23.199		180	0		165.964	14.036		178.854	1.146		170.473	9.527		171.048	8.952		175.535	4.465		175.815	4.185		165.964	14.036		153.435	26.565		173.934	6.066		163.811	16.189			13.4503
		22	157.122	22.878		179.474	0.526		138.652	41.348		156.801	23.199		178.226	1.774		165.964	14.036		178.854	1.146		170.473	9.527		171.048	8.952		175.535	4.465		175.815	4.185		165.964	14.036		161.565	18.435		173.934	6.066		163.811	16.189			12.4508
		23	157.122	22.878		179.474	0.526		138.652	41.348		156.801	23.199		177.87	2.13		174.806	5.194		178.854	1.146		170.473	9.527		164.745	15.255		171.752	8.248		173.319	6.681		165.964	14.036		161.565	18.435		166.329	13.671		163.811	16.189			13.2309
		24	159.272	20.728		179.474	0.526		139.764	40.236		162.329	17.671		177.879	2.121		177.614	2.386		178.854	1.146		170.473	9.527		169.787	10.213		171.752	8.248		173.319	6.681		177.162	2.838		161.565	18.435		170.115	9.885		163.811	16.189			11.122
		25	159.272	20.728		176.248	3.752		143.484	36.516		162.329	17.671		177.879	2.121		177.614	2.386		176.285	3.715		169.778	10.222		169.787	10.213		171.752	8.248		173.319	6.681		177.162	2.838		168.996	11.004		170.115	9.885		163.811	16.189			10.8113
		26	150.751	29.249		176.248	3.752		143.484	36.516		162.329	17.671		177.879	2.121		179.694	0.306		178.746	1.254		169.778	10.222		169.787	10.213		171.752	8.248		173.319	6.681		177.162	2.838		168.996	11.004		170.115	9.885		163.811	16.189			11.0766
		27	157.521	22.479		177.169	2.831		145.305	34.695		162.329	17.671		177.797	2.203		179.694	0.306		178.746	1.254		175.068	4.932		149.036	30.964		178.586	1.414		173.319	6.681		177.162	2.838		168.996	11.004		170.115	9.885		163.811	16.189			11.0231
		28	157.521	22.479		179.281	0.719		147.804	32.196		162.35	17.65		180	0		179.694	0.306		175.601	4.399		175.068	4.932		149.036	30.964		178.586	1.414		173.024	6.976		177.274	2.726		168.996	11.004		176.438	3.562		163.811	16.189			10.3677
		29	157.521	22.479		180	0		147.804	32.196		162.35	17.65		180	0		178.375	1.625		175.601	4.399		175.068	4.932		149.036	30.964		178.586	1.414		173.024	6.976		177.274	2.726		158.669	21.331		176.438	3.562		163.811	16.189			11.0962
		30	164.291	15.709		180	0		147.804	32.196		141.582	38.418		180	0		178.375	1.625		175.601	4.399		175.068	4.932		149.036	30.964		178.586	1.414		173.024	6.976		177.274	2.726		158.669	21.331		176.438	3.562		163.811	16.189			12.0294
		line	gh3.3,5,6
		treatment
			1	1comp		2	2comp		3	3comp		4	4comp		5	5comp		6	6comp		7	7comp		8	8comp		9	9comp		10	10comp		11	11comp		12	12comp		13	13comp		14	14comp		15	15comp			average
		1	4.123	175.877		5.282	174.718		2.157	177.843		4.35	175.65		5.594	174.406		4.849	175.151		9.636	170.364		4.117	175.883		3.129	176.871		2.876	177.124		6.45	173.55		3.319	176.681		4.082	175.918		2.121	177.879		4.254	175.746			175.577
		2	4.123	175.877		5.282	174.718		2.157	177.843		7.125	172.875		5.594	174.406		11.497	168.503		9.636	170.364		4.117	175.883		3.129	176.871		2.876	177.124		9.462	170.538		6.521	173.479		4.082	175.918		2.121	177.879		4.254	175.746			174.535
		3	16.821	163.179		30.51	149.49		7.462	172.538		23.772	156.228		20.344	159.656		38.06	141.94		30.069	149.931		14.812	165.188		7.237	172.763		10.731	169.269		45.895	134.105		22.273	157.727		12.653	167.347		3.749	176.251		8.718	171.282			160.46
		4	16.821	163.179		40.666	139.334		15.921	164.079		21.801	158.199		41.053	138.947		38.06	141.94		30.964	149.036		14.812	165.188		20.726	159.274		13.314	166.686		49.977	130.023		22.273	157.727		18.435	161.565		18.104	161.896		29.844	150.156			153.815
		5	21.403	158.597		29.387	150.613		8.285	171.715		13.51	166.49		41.053	138.947		65.655	114.345		46.384	133.616		17.645	162.355		42.515	137.485		13.314	166.686		49.977	130.023		22.273	157.727		42.955	137.045		23.07	156.93		29.844	150.156			148.849
		6	34.031	145.969		27.329	152.671		17.58	162.42		34.5	145.5		47.291	132.709		34.873	145.127		50.885	129.115		17.645	162.355		39.495	140.505		29.297	150.703		58.031	121.969		21.866	158.134		103.369	76.631		43.09	136.91		31.215	148.785			140.634
		7	31.221	148.779		30.466	149.534		24.613	155.387		40.705	139.295		59.179	120.821		34.873	145.127		41.049	138.951		17.645	162.355		39.495	140.505		35.181	144.819		88.226	91.774		55.033	124.967		134.246	45.754		80.209	99.791		31.215	148.785			130.443
		8	41.882	138.118		30.466	149.534		24.613	155.387		27.117	152.883		59.179	120.821		62.447	117.553		92.42	87.58		19.276	160.724		57.68	122.32		52.141	127.859		88.226	91.774		86.689	93.311		150.945	29.055		100.008	79.992		69.114	110.886			115.853
		9	41.882	138.118		31.126	148.874		23.405	156.595		27.117	152.883		71.45	108.55		62.447	117.553		132.518	47.482		27.536	152.464		66.161	113.839		86.634	93.366		88.226	91.774		110.136	69.864		145.713	34.287		130.078	49.922		68.342	111.658			105.815
		10	29.604	150.396		31.126	148.874		26.531	153.469		38.397	141.603		77.335	102.665		77.196	102.804		136.53	43.47		49.267	130.733		95.084	84.916		138.814	41.186		128.66	51.34		131.424	48.576		145.713	34.287		150.029	29.971		91.975	88.025			90.1543
		11	38.952	141.048		28.199	151.801		28.404	151.596		38.397	141.603		77.335	102.665		77.196	102.804		136.53	43.47		90.086	89.914		129.695	50.305		137.045	42.955		119.383	60.617		147.995	32.005		140.681	39.319		140.555	39.445		91.975	88.025			85.1715
		12	69.796	110.204		28.199	151.801		36.056	143.944		43.112	136.888		103.21	76.79		69.677	110.323		157.899	22.101		126.088	53.912		153.435	26.565		137.045	42.955		121.631	58.369		162.553	17.447		147.659	32.341		144.774	35.226		91.975	88.025			73.7927
		13	73.805	106.195		35.591	144.409		35.568	144.432		63.256	116.744		101.935	78.065		80.538	99.462		157.899	22.101		161.565	18.435		158.974	21.026		163.61	16.39		115.904	64.096		154.566	25.434		147.659	32.341		148.736	31.264		105.524	74.476			66.3247
		14	99.508	80.492		35.591	144.409		64.3	115.7		63.256	116.744		101.935	78.065		116.797	63.203		176.857	3.143		171.87	8.13		155.472	24.528		163.61	16.39		127.62	52.38		154.566	25.434		160.988	19.012		148.736	31.264		105.524	74.476			56.8913
		15	116.415	63.585		41.247	138.753		108.166	71.834		128.771	51.229		108.778	71.222		116.797	63.203		176.857	3.143		154.604	25.396		161.482	18.518		169.992	10.008		127.62	52.38		154.566	25.434		160.988	19.012		145.62	34.38		135	45			46.2065
		16	142.579	37.421		52.702	127.298		120.851	59.149		164.598	15.402		125.272	54.728		138.892	41.108		176.857	3.143		163.339	16.661		161.482	18.518		169.992	10.008		149.421	30.579		154.566	25.434		160.988	19.012		145.62	34.38		135	45			35.8561
		17	144.034	35.966		61.711	118.289		130.815	49.185		164.598	15.402		125.272	54.728		145.41	34.59		177.94	2.06		163.339	16.661		165.338	14.662		169.828	10.172		149.421	30.579		165.964	14.036		160.988	19.012		167.502	12.498		155.507	24.493			30.1555
		18	163.571	16.429		122.047	57.953		145.691	34.309		164.598	15.402		150.858	29.142		145.41	34.59		177.94	2.06		173.675	6.325		165.338	14.662		169.828	10.172		155.225	24.775		165.964	14.036		161.701	18.299		167.502	12.498		155.507	24.493			21.0097
		19	163.571	16.429		122.047	57.953		145.691	34.309		164.598	15.402		150.858	29.142		145.41	34.59		177.94	2.06		173.675	6.325		166.983	13.017		177.797	2.203		162.759	17.241		165.964	14.036		161.701	18.299		161.013	18.987		155.507	24.493			20.2991
		20	166.727	13.273		143.66	36.34		176.766	3.234		164.598	15.402		170.789	9.211		163.265	16.735		177.94	2.06		179.826	0.174		166.983	13.017		173.604	6.396		162.759	17.241		165.964	14.036		175.078	4.922		161.013	18.987		159.121	20.879			12.7938
		21	166.727	13.273		143.66	36.34		176.766	3.234		174.405	5.595		170.789	9.211		164.129	15.871		177.94	2.06		179.826	0.174		169.166	10.834		179.668	0.332		174.958	5.042		165.964	14.036		175.078	4.922		174.108	5.892		159.121	20.879			9.84633
		22	166.727	13.273		147.704	32.296		177.111	2.889		177.861	2.139		175.21	4.79		164.129	15.871		176.61	3.39		179.826	0.174		172.893	7.107		178.184	1.816		178.363	1.637		165.964	14.036		175.078	4.922		178.664	1.336		169.216	10.784			7.764
		23	166.727	13.273		159.77	20.23		177.111	2.889		177.861	2.139		175.21	4.79		164.129	15.871		176.388	3.612		174.257	5.743		172.893	7.107		178.184	1.816		178.363	1.637		165.964	14.036		175.078	4.922		179.559	0.441		169.216	10.784			7.286
		24	173.29	6.71		159.77	20.23		177.111	2.889		177.861	2.139		175.21	4.79		164.129	15.871		179.883	0.117		178.824	1.176		172.893	7.107		178.184	1.816		178.363	1.637		165.964	14.036		175.078	4.922		179.559	0.441		169.216	10.784			6.311
		25	173.29	6.71		159.77	20.23		179.789	0.211		175.299	4.701		175.21	4.79		164.129	15.871		179.883	0.117		178.824	1.176		163.811	16.189		179.044	0.956		173.991	6.009		157.834	22.166		175.078	4.922		179.559	0.441		169.216	10.784			7.68487
		26	173.29	6.71		169.144	10.856		179.789	0.211		175.299	4.701		175.21	4.79		164.129	15.871		179.883	0.117		178.824	1.176		164.624	15.376		179.044	0.956		173.991	6.009		157.834	22.166		177.211	2.789		179.559	0.441		173.157	6.843			6.6008
		27	173.29	6.71		169.144	10.856		179.789	0.211		175.299	4.701		175.21	4.79		164.129	15.871		179.441	0.559		178.824	1.176		164.624	15.376		179.044	0.956		173.991	6.009		157.834	22.166		179.322	0.678		179.559	0.441		173.157	6.843			6.48953
		28	173.29	6.71		165.141	14.859		179.789	0.211		175.299	4.701		175.21	4.79		163.389	16.611		179.441	0.559		178.824	1.176		164.624	15.376		179.044	0.956		173.991	6.009		161.328	18.672		179.322	0.678		179.559	0.441		175.764	4.236			6.399
		29	173.29	6.71		165.141	14.859		180	0		175.299	4.701		177.678	2.322		163.389	16.611		179.441	0.559		176.872	3.128		169.703	10.297		179.044	0.956		168.437	11.563		161.328	18.672		179.322	0.678		179.559	0.441		175.764	4.236			6.3822
		30	173.29	6.71		165.141	14.859		180	0		175.299	4.701		177.678	2.322		163.389	16.611		174.894	5.106		176.872	3.128		173.451	6.549		177.077	2.923		172.724	7.276		161.328	18.672		175.386	4.614		179.559	0.441		175.764	4.236			6.5432
[truncated: 2 more columns]

## Sheet: Figure 1F
20180511
		line	WT
		treatment
			1	1comp		2	2comp		3	3comp		4	4comp		5	5comp		6	6comp		7	7comp		8	8comp		9	9comp		10	10comp		11	11comp		12	12comp		13	13comp		14	14comp		15	15comp			average
		1	3.366	176.634		4.621	175.379		4.97	175.03		1.219	178.781		10.199	169.801		6.561	173.439		4.641	175.359		3.629	176.371		4.97	175.03		8.531	171.469		2.937	177.063		3.719	176.281		7.672	172.328		8.569	171.431		8.973	171.027			174.362
		2	25.56	154.44		43.152	136.848		6.457	173.543		5.98	174.02		34.154	145.846		40.601	139.399		11.085	168.915		9.574	170.426		26.2	153.8		26.255	153.745		9.615	170.385		15.461	164.539		11.31	168.69		18.435	161.565		19.44	160.56			159.781
		3	83.991	96.009		72.711	107.289		16.789	163.211		7.238	172.762		79.509	100.491		50.377	129.623		43.452	136.548		11.583	168.417		23.614	156.386		7.275	172.725		12.2	167.8		11.741	168.259		13.412	166.588		18.435	161.565		18.229	161.771			148.63
		4	75.964	104.036		82.795	97.205		43.866	136.134		9.847	170.153		85.601	94.399		87.803	92.197		43.264	136.736		11.026	168.974		58.988	121.012		7.202	172.798		14.407	165.593		10.894	169.106		13.241	166.759		16.887	163.113		15.026	164.974			141.546
		5	75.379	104.621		82.795	97.205		28.301	151.699		8.24	171.76		69.258	110.742		102.692	77.308		62.752	117.248		11.026	168.974		70.339	109.661		15.836	164.164		14.407	165.593		5.51	174.49		13.241	166.759		20.499	159.501		16.444	163.556			140.219
		6	74.501	105.499		89.119	90.881		42.656	137.344		18.122	161.878		60.209	119.791		124.104	55.896		78.517	101.483		10.564	169.436		46.219	133.781		19.523	160.477		21.958	158.042		4.17	175.83		12.907	167.093		19.25	160.75		26.021	153.979			136.811
		7	85.601	94.399		84.043	95.957		37.235	142.765		20.182	159.818		63.435	116.565		136.332	43.668		78.517	101.483		34.836	145.164		37.022	142.978		22.38	157.62		29.18	150.82		22.929	157.071		25.843	154.157		16.348	163.652		25.388	154.612			132.049
		8	85.236	94.764		65.917	114.083		33.932	146.068		21.743	158.257		54.207	125.793		142.009	37.991		81.487	98.513		53.673	126.327		44.926	135.074		31.759	148.241		39.529	140.471		25.046	154.954		32.177	147.823		19.053	160.947		32.985	147.015			129.088
		9	92.831	87.169		76.118	103.882		33.232	146.768		27.072	152.928		57.503	122.497		142.696	37.304		69.934	110.066		120.566	59.434		61.97	118.03		26.272	153.728		54.58	125.42		21.011	158.989		32.177	147.823		22.528	157.472		47.121	132.879			120.959
		10	96.47	83.53		66.86	113.14		34.086	145.914		37.875	142.125		57.529	122.471		154.263	25.737		50.528	129.472		115.262	64.738		73.362	106.638		28.393	151.607		50.681	129.319		30.79	149.21		43.923	136.077		25.17	154.83		70.336	109.664			117.631
		11	96.47	83.53		53.781	126.219		40.734	139.266		40.385	139.615		55.091	124.909		155.587	24.413		49.094	130.906		129.171	50.829		104.324	75.676		24.98	155.02		50.681	129.319		30.272	149.728		64.038	115.962		26.747	153.253		83.787	96.213			112.991
		12	104.036	75.964		60.484	119.516		41.219	138.781		42.24	137.76		56.725	123.275		160.56	19.44		84.56	95.44		136.134	43.866		109.352	70.648		45.316	134.684		42.409	137.591		52.902	127.098		63.89	116.11		26.747	153.253		107.425	72.575			104.4
		13	119.476	60.524		80.638	99.362		46.066	133.934		42.557	137.443		56.725	123.275		163.072	16.928		135.815	44.185		141.9	38.1		126.237	53.763		58.707	121.293		147.529	32.471		71.834	108.166		85.815	94.185		31.057	148.943		106.173	73.827			85.7599
		14	119.476	60.524		71.238	108.762		52.341	127.659		42.557	137.443		52.125	127.875		163.072	16.928		146.31	33.69		150.362	29.638		134.332	45.668		82.427	97.573		118.77	61.23		95.2	84.8		101.058	78.942		52.804	127.196		106.233	73.767			80.7797
		15	131.561	48.439		71.238	108.762		63.978	116.022		47.241	132.759		42.082	137.918		170.134	9.866		146.31	33.69		152.231	27.769		143.673	36.327		115.067	64.933		135.58	44.42		113.374	66.626		136.674	43.326		61.699	118.301		113.003	66.997			70.4103
		16	139.934	40.066		67.751	112.249		68.571	111.429		53.621	126.379		42.486	137.514		170.877	9.123		149.25	30.75		153.281	26.719		149.287	30.713		142.294	37.706		129.712	50.288		121.524	58.476		144.021	35.979		65.599	114.401		109.122	70.878			66.178
		17	139.934	40.066		91.445	88.555		68.808	111.192		54.452	125.548		51.994	128.006		170.877	9.123		149.25	30.75		155.63	24.37		163.585	16.415		147.529	32.471		141.177	38.823		132.825	47.175		165.024	14.976		79.88	100.12		101.883	78.117			59.0471
		18	140.556	39.444		113.744	66.256		98.46	81.54		100.46	79.54		62.9	117.1		169.613	10.387		149.25	30.75		155.63	24.37		163.585	16.415		161.761	18.239		148.241	31.759		129.072	50.928		164.604	15.396		82.355	97.645		126.027	53.973			48.9161
		19	147.834	32.166		115.799	64.201		109.299	70.701		123.835	56.165		79.457	100.543		174.56	5.44		129.218	50.782		168.019	11.981		166.878	13.122		173.887	6.113		148.241	31.759		129.072	50.928		178.021	1.979		82.009	97.991		126.762	53.238			43.1406
		20	151.891	28.109		145.408	34.592		129.529	50.471		123.835	56.165		83.66	96.34		175.663	4.337		139.522	40.478		168.019	11.981		166.462	13.538		173.887	6.113		153.365	26.635		143.412	36.588		178.021	1.979		78.9	101.1		126.762	53.238			37.4443
		21	154.977	25.023		136.245	43.755		129.936	50.064		132.722	47.278		100.587	79.413		175.663	4.337		148.416	31.584		163.58	16.42		167.093	12.907		169.471	10.529		153.365	26.635		143.412	36.588		178.417	1.583		95.254	84.746		138.556	41.444			34.1537
		22	154.977	25.023		136.245	43.755		133.971	46.029		147.894	32.106		154.302	25.698		179.835	0.165		160.47	19.53		162.742	17.258		167.093	12.907		175.568	4.432		153.004	26.996		146.713	33.287		178.417	1.583		95.44	84.56		127.266	52.734			28.4042
		23	154.977	25.023		137.708	42.292		140.289	39.711		151.08	28.92		164.582	15.418		179.835	0.165		160.75	19.25		159.574	20.426		167.093	12.907		173.089	6.911		153.004	26.996		146.713	33.287		179.721	0.279		121.449	58.551		130.03	49.97			25.3404
		24	154.977	25.023		137.708	42.292		146.31	33.69		151.08	28.92		164.767	15.233		179.835	0.165		160.75	19.25		159.016	20.984		170.299	9.701		173.089	6.911		161.75	18.25		146.713	33.287		179.721	0.279		126.6	53.4		139.749	40.251			23.1757
		25	154.977	25.023		137.708	42.292		144.438	35.562		143.009	36.991		168.2	11.8		175.529	4.471		163.588	16.412		153.455	26.545		170.299	9.701		168.016	11.984		161.75	18.25		138.708	41.292		179.721	0.279		133.965	46.035		144.353	35.647			24.1523
		26	154.977	25.023		137.708	42.292		153.172	26.828		146.505	33.495		167.039	12.961		175.529	4.471		163.588	16.412		163.072	16.928		170.299	9.701		168.016	11.984		161.75	18.25		138.708	41.292		176.586	3.414		133.965	46.035		144.353	35.647			22.9822
		27	157.404	22.596		137.708	42.292		153.172	26.828		138.265	41.735		176.055	3.945		175.529	4.471		171.763	8.237		163.072	16.928		170.697	9.303		172.628	7.372		161.75	18.25		144.518	35.482		176.586	3.414		127.405	52.595		144.954	35.046			21.8996
		28	157.404	22.596		137.708	42.292		161.95	18.05		137.732	42.268		179.175	0.825		175.972	4.028		171.763	8.237		167.778	12.222		170.697	9.303		172.628	7.372		161.75	18.25		144.518	35.482		171.674	8.326		132.882	47.118		137.603	42.397			21.2511
		29	157.404	22.596		137.571	42.429		161.95	18.05		131.847	48.153		179.175	0.825		179.356	0.644		171.763	8.237		167.692	12.308		170.697	9.303		174.87	5.13		166.358	13.642		151.526	28.474		172.694	7.306		146.421	33.579		144.951	35.049			19.0483
		30	157.404	22.596		137.571	42.429		170.981	9.019		128.501	51.499		176.934	3.066		179.356	0.644		171.763	8.237		167.692	12.308		170.697	9.303		175.668	4.332		166.358	13.642		151.526	28.474		178.668	1.332		139.415	40.585		144.951	35.049			18.8343
		line	WES 1D
		treatment
			1	1comp		2	2comp		3	3comp		4	4comp		5	5comp		6	6comp		7	7comp		8	8comp		9	9comp		10	10comp		11	11comp		12	12comp		13	13comp		14	14comp		15	15comp			average
		1	12.995	167.005		27.897	152.103		10.722	169.278		9.386	170.614		5.901	174.099		4.697	175.303		9.638	170.362		6.582	173.418		4.17	175.83		6.836	173.164		3.256	176.744		3.318	176.682		26.565	153.435		10.525	169.475		4.764	175.236			170.183
		2	46.625	133.375		90	90		53.13	126.87		73.74	106.26		93.366	86.634		23.785	156.215		117.897	62.103		115.233	64.767		13.642	166.358		58.658	121.342		32.586	147.414		52.07	127.93		68.264	111.736		70.9	109.1		79.33	100.67			114.052
		3	46.625	133.375		133.63	46.37		100.222	79.778		137.951	42.049		141.267	38.733		81.027	98.973		166.43	13.57		127.011	52.989		58.314	121.686		75.069	104.931		114.291	65.709		134.474	45.526		168.292	11.708		116.779	63.221		98.13	81.87			66.6992
		4	69.321	110.679		133.63	46.37		129.124	50.876		157.395	22.605		154.156	25.844		87.58	92.42		166.43	13.57		112.78	67.22		61.227	118.773		121.43	58.57		129.806	50.194		172.942	7.058		168.292	11.708		159.775	20.225		150.041	29.959			48.4047
		5	69.321	110.679		131.634	48.366		136.606	43.394		157.395	22.605		175.006	4.994		98.223	81.777		162.65	17.35		141.888	38.112		108.435	71.565		95.959	84.041		137.854	42.146		178.25	1.75		156.741	23.259		156.715	23.285		148.333	31.667			42.9993
		6	113.199	66.801		128.009	51.991		144.856	35.144		160.253	19.747		175.006	4.994		71.761	108.239		160.357	19.643		131.319	48.681		110.999	69.001		101.634	78.366		137.854	42.146		178.25	1.75		139.139	40.861		156.715	23.285		134.07	45.93			43.7719
		7	128.709	51.291		144.14	35.86		147.614	32.386		166.755	13.245		179.303	0.697		56.01	123.99		158.649	21.351		140.78	39.22		110.999	69.001		97.455	82.545		117.112	62.888		175.962	4.038		139.139	40.861		161.565	18.435		127.751	52.249			43.2038
		8	141.153	38.847		152.78	27.22		153.547	26.453		166.755	13.245		179.303	0.697		46.96	133.04		160.683	19.317		141.871	38.129		100.219	79.781		99.1	80.9		122.525	57.475		171.921	8.079		139.604	40.396		161.565	18.435		132.468	47.532			41.9697
		9	150.747	29.253		153.456	26.544		153.547	26.453		173.884	6.116		179.303	0.697		55.62	124.38		160.683	19.317		170.473	9.527		100.144	79.856		99.1	80.9		125.576	54.424		171.921	8.079		131.547	48.453		155.225	24.775		132.527	47.473			39.0831
		10	155.739	24.261		153.456	26.544		169.123	10.877		173.884	6.116		179.303	0.697		65.376	114.624		168.4	11.6		169.867	10.133		96.394	83.606		107.466	72.534		125.576	54.424		172.111	7.889		131.547	48.453		155.225	24.775		140.641	39.359			35.7261
		11	164.539	15.461		153.456	26.544		174.161	5.839		173.884	6.116		179.303	0.697		65.376	114.624		161.107	18.893		170.485	9.515		124.283	55.717		83.718	96.282		129.13	50.87		172.111	7.889		137.297	42.703		155.225	24.775		148.046	31.954			33.8586
		12	164.539	15.461		153.456	26.544		171.529	8.471		172.037	7.963		179.303	0.697		65.376	114.624		161.107	18.893		170.485	9.515		157.126	22.874		101.695	78.305		129.13	50.87		172.111	7.889		141.839	38.161		155.225	24.775		148.046	31.954			30.4664
		13	156.038	23.962		172.405	7.595		171.529	8.471		172.037	7.963		174.396	5.604		65.376	114.624		161.925	18.075		170.485	9.515		163.461	16.539		138.029	41.971		135	45		178.432	1.568		141.839	38.161		155.225	24.775		159.671	20.329			25.6101
		14	156.038	23.962		172.405	7.595		171.529	8.471		172.037	7.963		172.337	7.663		65.376	114.624		161.925	18.075		170.485	9.515		172.515	7.485		139.306	40.694		146.76	33.24		178.432	1.568		141.839	38.161		154.799	25.201		159.671	20.329			24.3031
		15	156.038	23.962		173.561	6.439		171.529	8.471		172.037	7.963		178.807	1.193		74.055	105.945		170.631	9.369		174.967	5.033		172.515	7.485		144.513	35.487		151.176	28.824		178.432	1.568		141.839	38.161		154.799	25.201		159.671	20.329			21.6953
		16	156.514	23.486		173.561	6.439		171.529	8.471		172.037	7.963		178.807	1.193		74.055	105.945		170.631	9.369		174.967	5.033		172.515	7.485		150.986	29.014		151.176	28.824		178.432	1.568		141.839	38.161		154.799	25.201		164.89	15.11			20.8841
		17	156.514	23.486		173.561	6.439		171.529	8.471		179.029	0.971		178.807	1.193		74.055	105.945		170.631	9.369		173.826	6.174		176.326	3.674		150.255	29.745		151.176	28.824		178.432	1.568		146.199	33.801		154.799	25.201		164.89	15.11			19.9981
		18	152.793	27.207		173.561	6.439		175.343	4.657		179.029	0.971		178.807	1.193		74.055	105.945		170.631	9.369		170.538	9.462		176.326	3.674		150.255	29.745		151.176	28.824		179.383	0.617		146.199	33.801		154.799	25.201		164.89	15.11			20.1477
		19	152.103	27.897		173.561	6.439		175.343	4.657		179.029	0.971		178.807	1.193		74.055	105.945		170.631	9.369		170.538	9.462		172.768	7.232		153.947	26.053		151.176	28.824		179.383	0.617		146.199	33.801		154.799	25.201		171.649	8.351			19.7341
		20	152.103	27.897		180	0		175.343	4.657		179.029	0.971		178.807	1.193		74.055	105.945		170.631	9.369		170.538	9.462		172.768	7.232		153.947	26.053		151.176	28.824		179.383	0.617		146.199	33.801		154.799	25.201		171.649	8.351			19.3049
		21	154.654	25.346		180	0		175.343	4.657		179.029	0.971		178.807	1.193		74.055	105.945		170.631	9.369		171.38	8.62		172.768	7.232		158.585	21.415		151.176	28.824		179.383	0.617		146.199	33.801		154.799	25.201		171.649	8.351			18.7695
		22	154.654	25.346		177.714	2.286		175.343	4.657		179.029	0.971		178.807	1.193		77.005	102.995		170.631	9.369		171.38	8.62		172.768	7.232		158.585	21.415		151.176	28.824		176.532	3.468		146.199	33.801		154.799	25.201		178.087	1.913			18.4861
		23	154.654	25.346		177.714	2.286		175.343	4.657		179.029	0.971		178.807	1.193		77.005	102.995		170.631	9.369		165.943	14.057		179.895	0.105		158.585	21.415		151.176	28.824		176.532	3.468		146.199	33.801		154.799	25.201		178.087	1.913			18.3734
		24	154.654	25.346		177.714	2.286		175.343	4.657		179.029	0.971		178.807	1.193		77.005	102.995		176.878	3.122		165.943	14.057		179.895	0.105		158.585	21.415		151.176	28.824		176.532	3.468		146.199	33.801		154.799	25.201		178.087	1.913			17.9569
		25	154.654	25.346		177.714	2.286		175.343	4.657		179.029	0.971		178.807	1.193		77.005	102.995		179.284	0.716		166.31	13.69		179.895	0.105		158.585	21.415		151.176	28.824		176.532	3.468		146.199	33.801		151.717	28.283		178.087	1.913			17.9775
		26	161.565	18.435		177.714	2.286		174.125	5.875		179.029	0.971		178.807	1.193		77.005	102.995		177.084	2.916		173.394	6.606		179.895	0.105		163.254	16.746		150.945	29.055		176.532	3.468		144.924	35.076		151.717	28.283		178.087	1.913			17.0615
		27	161.565	18.435		177.714	2.286		174.125	5.875		179.029	0.971		179.903	0.097		77.005	102.995		167.255	12.745		173.394	6.606		179.895	0.105		163.254	16.746		150.945	29.055		176.532	3.468		157.555	22.445		151.717	28.283		178.087	1.913			16.8017
		28	163.918	16.082		170.344	9.656		174.125	5.875		179.029	0.971		179.903	0.097		77.296	102.704		171.082	8.918		173.394	6.606		175.836	4.164		165.564	14.436		150.945	29.055		176.532	3.468		153.937	26.063		151.717	28.283		178.087	1.913			17.2194
		29	163.918	16.082		173.161	6.839		172.132	7.868		179.029	0.971		179.903	0.097		77.296	102.704		171.082	8.918		173.394	6.606		178.097	1.903		165.564	14.436		150.945	29.055		176.532	3.468		153.937	26.063		151.717	28.283		178.571	1.429			16.9815
		30	163.918	16.082		173.712	6.288		173.517	6.483		179.029	0.971		179.903	0.097		77.296	102.704		171.082	8.918		173.394	6.606		178.097	1.903		165.564	14.436		150.945	29.055		176.532	3.468		161.857	18.143		148.875	31.125		178.571	1.429			16.5139
20180614
		line	WT
		treatment	mock
			1	1comp		2	2comp		3	3comp		4	4comp		5	5comp		6	6comp		7	7comp		8	8comp		9	9comp		10	10comp		11	11comp		12	12comp		13	13comp		14	14comp		15	15comp			average
		1	4.379	175.621		9.462	170.538		4.13	175.87		2.974	177.026		3.691	176.309		5.362	174.638		2.793	177.207		6.34	173.66		3.446	176.554		5.777	174.223		3.794	176.206		3.003	176.997		6.546	173.454		2.609	177.391		10.008	169.992			175.046
		2	6.567	173.433		10.573	169.427		22.447	157.553		12.691	167.309		12.529	167.471		9.462	170.538		11.158	168.842		13.134	166.866		8.386	171.614		8.752	171.248		13.347	166.653		11.175	168.825		17.148	162.852		9.478	170.522		18.138	161.862			167.668
		3	28.788	151.212		23.081	156.919		48.013	131.987		18.484	161.516		26.687	153.313		10.15	169.85		54.273	125.727		18.435	161.565		5.999	174.001		18.905	161.095		16.029	163.971		28.573	151.427		41.566	138.434		18.79	161.21		50.434	129.566			152.786
		4	28.307	151.693		23.081	156.919		59.512	120.488		30.498	149.502		26.687	153.313		40.003	139.997		78.69	101.31		38.454	141.546		55.62	124.38		38.784	141.216		35.366	144.634		22.053	157.947		29.682	150.318		25.346	154.654		50.434	129.566			141.166
		5	35.17	144.83		24.028	155.972		59.512	120.488		24.522	155.478		40.928	139.072		64.011	115.989		73.686	106.314		47.274	132.726		53.461	126.539		38.784	141.216		30.406	149.594		20.506	159.494		31.353	148.647		28.96	151.04		61.314	118.686			137.739
		6	35.17	144.83		30.839	149.161		113.839	66.161		33.573	146.427		40.928	139.072		64.011	115.989		82.372	97.628		47.274	132.726		56.332	123.668		46.507	133.493		43.067	136.933		29.839	150.161		28.204	151.796		34.019	145.981		48.013	131.987			131.068
		7	46.332	133.668		47.395	132.605		113.904	66.096		36.465	143.535		35.349	144.651		82.544	97.456		86.689	93.311		60.343	119.657		48.161	131.839		56.875	123.125		45.585	134.415		31.779	148.221		21.595	158.405		64.591	115.409		45.943	134.057			125.097
		8	63.677	116.323		48.555	131.445		126.501	53.499		38.984	141.016		35.349	144.651		108.489	71.511		82.77	97.23		58.736	121.264		43.506	136.494		57.653	122.347		63.435	116.565		49.897	130.103		25.224	154.776		92.121	87.879		30.52	149.48			118.306
		9	63.677	116.323		35.744	144.256		128.723	51.277		45	135		48.672	131.328		118.488	61.512		133.614	46.386		57.529	122.471		48.544	131.456		67.882	112.118		99.061	80.939		81.285	98.715		25.224	154.776		88.858	91.142		66.615	113.385			106.072
		10	99.897	80.103		25.925	154.075		123.69	56.31		45	135		49.123	130.877		108.532	71.468		146.626	33.374		69.146	110.854		44.052	135.948		67.882	112.118		62.773	117.227		92.031	87.969		26.019	153.981		69.212	110.788		75.898	104.102			106.28
		11	99.897	80.103		25.925	154.075		123.69	56.31		57.342	122.658		49.123	130.877		108.532	71.468		143.05	36.95		78.69	101.31		37.992	142.008		89.053	90.947		57.907	122.093		131.634	48.366		25.63	154.37		68.12	111.88		105.325	74.675			99.8727
		12	140.194	39.806		35.053	144.947		134.585	45.415		74.243	105.757		48.783	131.217		125.661	54.339		140.701	39.299		83.715	96.285		44.576	135.424		101.449	78.551		66.289	113.711		158.529	21.471		23.411	156.589		68.12	111.88		132.686	47.314			88.1337
		13	140.194	39.806		61.765	118.235		137.893	42.107		137.045	42.955		48.783	131.217		125.661	54.339		144.039	35.961		115.145	64.855		52.535	127.465		122.905	57.095		75.069	104.931		168.111	11.889		29.197	150.803		80.063	99.937		148.273	31.727			74.2215
		14	159.191	20.809		115.017	64.983		148.318	31.682		168.69	11.31		54.308	125.692		116.565	63.435		144.149	35.851		115.145	64.855		52.83	127.17		131.77	48.23		76.329	103.671		168.111	11.889		46.38	133.62		102.339	77.661		155.175	24.825			63.0455
		15	170.499	9.501		130.381	49.619		164.223	15.777		168.69	11.31		55.561	124.439		116.565	63.435		144.149	35.851		140.744	39.256		60.496	119.504		145.222	34.778		72.646	107.354		176.367	3.633		50.741	129.259		109.329	70.671		155.175	24.825			55.9475
		16	170.499	9.501		138.898	41.102		170.098	9.902		168.69	11.31		92.086	87.914		111.66	68.34		129.174	50.826		140.744	39.256		89.153	90.847		148.782	31.218		64.049	115.951		176.367	3.633		59.634	120.366		126.999	53.001		157.219	22.781			50.3965
		17	176.84	3.16		144.352	35.648		170.098	9.902		157.213	22.787		146.426	33.574		111.66	68.34		146.537	33.463		153.435	26.565		89.153	90.847		148.782	31.218		80.988	99.012		146.31	33.69		57.059	122.941		140.937	39.063		157.944	22.056			44.8177
		18	176.84	3.16		146.795	33.205		171.469	8.531		162.408	17.592		159.595	20.405		119.745	60.255		146.537	33.463		160.201	19.799		128.845	51.155		148.782	31.218		95.264	84.736		159.069	20.931		129.806	50.194		144.946	35.054		163.245	16.755			32.4302
		19	176.84	3.16		146.795	33.205		171.469	8.531		162.408	17.592		154.832	25.168		129.601	50.399		146.537	33.463		158.764	21.236		128.845	51.155		148.782	31.218		110.695	69.305		159.069	20.931		149.349	30.651		144.946	35.054		163.245	16.755			29.8549
		20	178.505	1.495		146.795	33.205		171.469	8.531		170.34	9.66		167.335	12.665		127.235	52.765		146.537	33.463		165.675	14.325		147.68	32.32		158.199	21.801		110.695	69.305		159.069	20.931		173.251	6.749		154.747	25.253		163.245	16.755			23.9482
		21	178.505	1.495		173.073	6.927		168.391	11.609		170.34	9.66		162.408	17.592		127.235	52.765		146.537	33.463		165.675	14.325		147.68	32.32		158.199	21.801		139.185	40.815		158.884	21.116		172.405	7.595		156.623	23.377		173.66	6.34			20.08
		22	178.505	1.495		173.073	6.927		170.565	9.435		170.156	9.844		171.87	8.13		132.047	47.953		146.537	33.463		177.263	2.737		158.259	21.741		158.199	21.801		145.109	34.891		165.203	14.797		172.405	7.595		156.623	23.377		172.666	7.334			16.768
		23	178.505	1.495		173.073	6.927		170.565	9.435		170.156	9.844		171.87	8.13		148.608	31.392		156.228	23.772		177.263	2.737		158.259	21.741		158.199	21.801		145.109	34.891		165.203	14.797		177.51	2.49		162.029	17.971		172.666	7.334			14.3171
		24	178.446	1.554		177.491	2.509		170.565	9.435		172.399	7.601		177.429	2.571		148.608	31.392		156.228	23.772		177.357	2.643		169.287	10.713		158.199	21.801		145.109	34.891		175.59	4.41		177.51	2.49		166.862	13.138		175.914	4.086			11.5337
		25	178.446	1.554		177.491	2.509		179.964	0.036		172.399	7.601		177.429	2.571		173.811	6.189		156.228	23.772		177.357	2.643		169.287	10.713		162.582	17.418		153.705	26.295		175.59	4.41		177.51	2.49		158.228	21.772		177.762	2.238			8.81407
		26																																															#DIV/0!
		27																																															#DIV/0!
		28																																															#DIV/0!
		29																																															#DIV/0!
		30																																															#DIV/0!
		line	Wes 1D
		treatment	mock
			1	1comp		2	2comp		3	3comp		4	4comp		5	5comp		6	6comp		7	7comp		8	8comp		9	9comp		10	10comp		11	11comp		12	12comp		13	13comp		14	14comp		15	15comp			average
		1	5.4	174.6		2.707	177.293		2.322	177.678		2.224	177.776		2.937	177.063		4.613	175.387		5.622	174.378		4.497	175.503		1.087	178.913		5.055	174.945		4.017	175.983		4.116	175.884		2.726	177.274		1.736	178.264		3.492	176.508			176.497
		2	13.273	166.727		5.042	174.958		4.012	175.988		7.736	172.264		2.937	177.063		7.734	172.266		4.574	175.426		8.113	171.887		8.13	171.87		5.214	174.786		7.838	172.162		7.326	172.674		3.671	176.329		5.44	174.56		10.718	169.282			173.216
		3	27.497	152.503		5.042	174.958		8.292	171.708		8.644	171.356		5.876	174.124		24.29	155.71		24.06	155.94		11.487	168.513		24.431	155.569		10.897	169.103		12.095	167.905		11.434	168.566		18.435	161.565		26.395	153.605		19.341	160.659			164.119
		4	85.914	94.086		20.116	159.884		7.999	172.001		46.018	133.982		10.128	169.872		98.746	81.254		90.981	89.019		38.089	141.911		38.66	141.34		17.339	162.661		33.69	146.31		59.959	120.041		36.293	143.707		41.138	138.862		18.435	161.565			137.1
		5	112.109	67.891		54.802	125.198		18.517	161.483		91.66	88.34		20.864	159.136		133.636	46.364		90.981	89.019		53.746	126.254		61.347	118.653		58.536	121.464		63.435	116.565		133.506	46.494		34.139	145.861		80.91	99.09		24.86	155.14			111.13
		6	112.751	67.249		90.122	89.878		25.304	154.696		107.571	72.429		37.914	142.086		128.395	51.605		105.04	74.96		86.262	93.738		78.366	101.634		81.085	98.915		92.603	87.397		125.961	54.039		31.993	148.007		107.526	72.474		28.876	151.124			97.3487
		7	112.751	67.249		115.582	64.418		57.312	122.688		105.966	74.034		90.365	89.635		133.611	46.389		119.778	60.222		123.69	56.31		109.213	70.787		137.175	42.825		112.007	67.993		143.578	36.422		31.993	148.007		105.464	74.536		42.306	137.694			77.2806
		8	112.751	67.249		127.875	52.125		94.399	85.601		113.199	66.801		129.56	50.44		133.611	46.389		119.778	60.222		157.937	22.063		155.213	24.787		147.029	32.971		151.94	28.06		135	45		31.629	148.371		144.246	35.754		46.548	133.452			59.9523
		9	125.185	54.815		121.426	58.574		105.89	74.11		116.975	63.025		127.875	52.125		140.573	39.427		113.629	66.371		141.825	38.175		161.03	18.97		162.279	17.721		145.049	34.951		128.53	51.47		31.705	148.295		144.246	35.754		61.348	118.652			58.1623
		10	125.958	54.042		133.962	46.038		136.941	43.059		155.026	24.974		142.23	37.77		150.555	29.445		140.87	39.13		154.372	25.628		161.03	18.97		154.145	25.855		144.978	35.022		126.227	53.773		56.041	123.959		144.246	35.754		65.925	114.075			47.1663
		11	136.811	43.189		141.301	38.699		134.917	45.083		168.566	11.434		133.152	46.848		147.529	32.471		140.87	39.13		147.216	32.784		161.03	18.97		154.145	25.855		155.95	24.05		150.611	29.389		67.218	112.782		145.372	34.628		102.175	77.825			40.8758
		12	141.82	38.18		147.128	32.872		140.412	39.588		168.566	11.434		133.152	46.848		149.47	30.53		153.435	26.565		148.951	31.049		149.434	30.566		168.056	11.944		155.95	24.05		171.015	8.985		83.845	96.155		145.372	34.628		105.803	74.197			35.8394
		13	144.839	35.161		147.128	32.872		159.895	20.105		174.33	5.67		145.479	34.521		149.47	30.53		130.764	49.236		144.394	35.606		163.626	16.374		160.253	19.747		151.515	28.485		173.66	6.34		94.039	85.961		170.653	9.347		105.803	74.197			32.2768
		14	144.839	35.161		148.1	31.9		159.895	20.105		172.918	7.082		138.222	41.778		163.573	16.427		131.296	48.704		130.135	49.865		163.626	16.374		153.66	26.34		151.515	28.485		173.66	6.34		94.039	85.961		168.179	11.821		105.803	74.197			33.3693
		15	160.145	19.855		156.878	23.122		157.944	22.056		158.009	21.991		138.222	41.778		161.54	18.46		131.408	48.592		143.894	36.106		161.433	18.567		159.739	20.261		158.839	21.161		174.289	5.711		100.333	79.667		168.179	11.821		141.66	38.34			28.4992
		16	160.145	19.855		163.834	16.166		157.944	22.056		147.377	32.623		154.142	25.858		161.54	18.46		145.45	34.55		166.088	13.912		161.433	18.567		166.891	13.109		164.943	15.057		174.289	5.711		100.333	79.667		165.53	14.47		164.279	15.721			23.0521
		17	167.552	12.448		163.834	16.166		166.479	13.521		147.377	32.623		154.142	25.858		176.07	3.93		145.45	34.55		157.508	22.492		161.433	18.567		163.598	16.402		158.199	21.801		174.289	5.711		100.333	79.667		165.53	14.47		172.595	7.405			21.7074
		18	167.552	12.448		164.745	15.255		167.239	12.761		134.442	45.558		154.142	25.858		176.07	3.93		146.07	33.93		148.232	31.768		164.932	15.068		166.43	13.57		158.199	21.801		168.776	11.224		100.333	79.667		172.951	7.049		172.595	7.405			22.4861
		19	167.552	12.448		156.236	23.764		178.843	1.157		131.741	48.259		154.142	25.858		176.07	3.93		146.07	33.93		164.932	15.068		164.932	15.068		170.62	9.38		158.199	21.801		173.115	6.885		120.814	59.186		172.951	7.049		172.595	7.405			19.4125
		20	167.552	12.448		166.724	13.276		165.082	14.918		128.063	51.937		154.142	25.858		166.598	13.402		148.241	31.759		158.07	21.93		164.932	15.068		170.62	9.38		163.639	16.361		178.095	1.905		120.814	59.186		172.951	7.049		175.365	4.635			19.9408
		21	167.552	12.448		166.724	13.276		173.987	6.013		142.685	37.315		154.142	25.858		168.815	11.185		148.241	31.759		158.03	21.97		164.932	15.068		170.62	9.38		163.639	16.361		178.095	1.905		121.782	58.218		175.135	4.865		175.365	4.635			18.0171
		22	167.552	12.448		163.695	16.305		179.823	0.177		162.809	17.191		154.142	25.858		168.815	11.185		148.241	31.759		158.03	21.97		144.823	35.177		170.62	9.38		163.639	16.361		178.095	1.905		121.782	58.218		175.135	4.865		175.365	4.635			17.8289
		23	172.19	7.81		163.695	16.305		179.823	0.177		162.809	17.191		160.615	19.385		163.462	16.538		150.018	29.982		166.439	13.561		151.624	28.376		170.62	9.38		163.639	16.361		178.095	1.905		121.782	58.218		175.135	4.865		175.365	4.635			16.3126
		24	172.19	7.81		176.269	3.731		179.823	0.177		176.1	3.9		160.615	19.385		171.584	8.416		154.047	25.953		166.439	13.561		151.624	28.376		170.62	9.38		163.639	16.361		178.095	1.905		121.782	58.218		175.135	4.865		178.555	1.445			13.5655
		25	172.19	7.81		176.269	3.731		179.823	0.177		176.1	3.9		160.615	19.385		171.584	8.416		154.047	25.953		166.439	13.561		151.624	28.376		169.052	10.948		168.401	11.599		178.095	1.905		121.782	58.218		178.781	1.219		178.555	1.445			13.1095
		26																																															#DIV/0!
		27																																															#DIV/0!
		28																																															#DIV/0!
		29																																															#DIV/0!
		30																																															#DIV/0!
20180622
		line	WT
		treatment	mock
			1	1comp		2	2comp		3	3comp		4	4comp		5	5comp		6	6comp		7	7comp		8	8comp		9	9comp		10	10comp		11	11comp		12	12comp		13	13comp		14	14comp		15	15comp			average
		1	3.122	176.878		3.595	176.405		2.603	177.397		1.134	178.866		1.931	178.069		5.906	174.094		3.122	176.878		4.829	175.171		1.515	178.485		3.569	176.431		2.203	177.797		2.531	177.469		2.121	177.879		2.862	177.138		4.764	175.236			176.946
		2	19.011	160.989		16.663	163.337		13.241	166.759		9.333	170.667		12.827	167.173		27.708	152.292		11.517	168.483		21.835	158.165		7.346	172.654		7.465	172.535		11.607	168.393		9.936	170.064		16.557	163.443		8.13	171.87		16.197	163.803			166.042
		3	24.305	155.695		13.392	166.608		14.036	165.964		17.292	162.708		39.898	140.102		65.225	114.775		31.43	148.57		46.736	133.264		9.17	170.83		14.737	165.263		27.019	152.981		12.127	167.873		17.965	162.035		11.908	168.092		30.442	149.558			154.955
		4	22.38	157.62		40.601	139.399		20.556	159.444		27.185	152.815		27.897	152.103		71.565	108.435		27.292	152.708		66.631	113.369		11.61	168.39		36.491	143.509		26.565	153.435		21.038	158.962		19.654	160.346		21.29	158.71		27.419	152.581			148.788
		5	20.518	159.482		32.341	147.659		23.299	156.701		71.323	108.677		43.152	136.848		52.815	127.185		27.35	152.65		70.145	109.855		23.711	156.289		34.63	145.37		23.314	156.686		36.539	143.461		26.244	153.756		25.671	154.329		28.028	151.972			144.061
		6	37.582	142.418		28.544	151.456		41.455	138.545		53.267	126.733		27.646	152.354		56.31	123.69		31.154	148.846		80.727	99.273		25.986	154.014		28.561	151.439		21.801	158.199		29.932	150.068		24.51	155.49		28.826	151.174		28.826	151.174			143.658
		7	38.173	141.827		34.144	145.856		104.621	75.379		55.631	124.369		17.601	162.399		45.434	134.566		33.174	146.826		92.49	87.51		20.925	159.075		30.09	149.91		38.92	141.08		35.036	144.964		27.008	152.992		31.121	148.879		22.38	157.62			138.217
		8	32.949	147.051		36.741	143.259		68.682	111.318		55.631	124.369		38.132	141.868		41.455	138.545		31.014	148.986		101.725	78.275		30.579	149.421		20.225	159.775		41.634	138.366		28.877	151.123		31.86	148.14		30.447	149.553		24.37	155.63			139.045
		9	37.854	142.146		91.94	88.06		59.036	120.964		50.412	129.588		61.038	118.962		85.03	94.97		28.183	151.817		42.955	137.045		45.49	134.51		32.936	147.064		65.995	114.005		41.944	138.056		32.06	147.94		33.503	146.497		23.367	156.633			131.217
		10	51.973	128.027		116.975	63.025		37.115	142.885		50.216	129.784		56.223	123.777		84.472	95.528		32.421	147.579		42.902	137.098		54.462	125.538		25.641	154.359		114.305	65.695		53.728	126.272		48.999	131.001		46.238	133.762		21.697	158.303			124.176
		11	57.095	122.905		164.185	15.815		54.231	125.769		50.866	129.134		77.418	102.582		93.366	86.634		29.411	150.589		49.495	130.505		58.465	121.535		19.231	160.769		177.917	2.083		68.94	111.06		55.426	124.574		53.39	126.61		21.697	158.303			111.258
		12	69.404	110.596		152.705	27.295		70.953	109.047		136.302	43.698		98.973	81.027		83.33	96.67		58.655	121.345		46.129	133.871		58.465	121.535		29.148	150.852		174.444	5.556		73.443	106.557		74.827	105.173		56.059	123.941		28.311	151.689			99.2568
		13	102.529	77.471		149.931	30.069		72.453	107.547		126.672	53.328		114.084	65.916		90.142	89.858		110.225	69.775		59.036	120.964		45.796	134.204		32.032	147.968		159.829	20.171		74.318	105.682		108.8	71.2		56.059	123.941		32.735	147.265			91.0239
		14	85.085	94.915		159.505	20.495		71.192	108.808		130.009	49.991		141.093	38.907		88.531	91.469		126.87	53.13		90	90		47.121	132.879		73.072	106.928		173.367	6.633		80.122	99.878		143.997	36.003		79.796	100.204		41.987	138.013			77.8835
		15	88.535	91.465		157.139	22.861		77.019	102.981		139.399	40.601		159.814	20.186		100.82	79.18		144.628	35.372		107.319	72.681		52.696	127.304		104.309	75.691		166.115	13.885		83.488	96.512		136.609	43.391		132.089	47.911		52.765	127.235			66.4837
		16	102.265	77.735		161.771	18.229		99.762	80.238		132.178	47.822		170.522	9.478		81.368	98.632		161.516	18.484		132.663	47.337		74.617	105.383		115.109	64.891		171.597	8.403		140.265	39.735		161.375	18.625		136.848	43.152		56.31	123.69			53.4556
		17	102.265	77.735		164.92	15.08		157.725	22.275		147.995	32.005		170.522	9.478		92.291	87.709		156.485	23.515		143.231	36.769		88.791	91.209		117.575	62.425		175.791	4.209		144.656	35.344		160.523	19.477		149.621	30.379		84.207	95.793			42.8935
		18	116.139	63.861		170.631	9.369		148.072	31.928		168.521	11.479		178.958	1.042		135.424	44.576		156.485	23.515		144.824	35.176		97.043	82.957		124.695	55.305		178.21	1.79		144.656	35.344		168.46	11.54		149.621	30.379		98.084	81.916			34.6785
		19	132.346	47.654		170.804	9.196		148.314	31.686		176.424	3.576		178.958	1.042		145.67	34.33		136.637	43.363		172.304	7.696		113.716	66.284		126.003	53.997		178.21	1.79		160.665	19.335		166.139	13.861		149.621	30.379		123.408	56.592			28.0521
		20	132.346	47.654		173.715	6.285		158.165	21.835		173.688	6.312		178.958	1.042		148.456	31.544		145.773	34.227		169.695	10.305		123.93	56.07		119.32	60.68		178.21	1.79		169.287	10.713		167.552	12.448		156.411	23.589		142.052	37.948			24.1628
		21	132.346	47.654		178.493	1.507		158.268	21.732		166.952	13.048		177.234	2.766		155.12	24.88		154.103	25.897		169.695	10.305		140.046	39.954		160.931	19.069		178.981	1.019		174.144	5.856		171.895	8.105		172.38	7.62		157.249	22.751			16.8109
		22	163.74	16.26		178.493	1.507		161.084	18.916		166.329	13.671		177.234	2.766		156.161	23.839		170.169	9.831		180	0		153.435	26.565		168.285	11.715		178.981	1.019		176.987	3.013		169.509	10.491		174.053	5.947		157.249	22.751			11.2194
		23	163.74	16.26		178.493	1.507		168.69	11.31		179.569	0.431		178.755	1.245		156.161	23.839		174.489	5.511		180	0		169.443	10.557		179.676	0.324		175.601	4.399		174.053	5.947		169.509	10.491		174.053	5.947		157.249	22.751			8.0346
		24	163.74	16.26		175.601	4.399		168.421	11.579		175.883	4.117		178.755	1.245		177.955	2.045		179.206	0.794		180	0		175.923	4.077		177.138	2.862		175.601	4.399		175.601	4.399		176.634	3.366		174.053	5.947		175.197	4.803			4.68613
		25	178.675	1.325		177.082	2.918		168.007	11.993		175.612	4.388		179.825	0.175		177.955	2.045		179.705	0.295		178.493	1.507		174.174	5.826		178.091	1.909		179.82	0.18		175.726	4.274		172.666	7.334		174.053	5.947		175.197	4.803			3.66127
		26	178.675	1.325		179.569	0.431		166.132	13.868		175.612	4.388		179.825	0.175		177.955	2.045		180	0		178.493	1.507		178.95	1.05		175.601	4.399		179.82	0.18		176.186	3.814		173.846	6.154		176.734	3.266		175.197	4.803			3.16033
		27	177.994	2.006		179.569	0.431		166.132	13.868		175.612	4.388		179.825	0.175		177.955	2.045		175.507	4.493		178.493	1.507		178.95	1.05		173.327	6.673		179.82	0.18		179.848	0.152		173.846	6.154		179.502	0.498		178.668	1.332			2.9968
		28	177.776	2.224		179.569	0.431		166.132	13.868		177.31	2.69		179.825	0.175		177.955	2.045		175.507	4.493		178.493	1.507		178.95	1.05		179.384	0.616		179.82	0.18		179.848	0.152		179.833	0.167		179.204	0.796		178.668	1.332			2.11507
		29	177.776	2.224		178.467	1.533		168.17	11.83		177.31	2.69		179.825	0.175		177.955	2.045		177.064	2.936		178.493	1.507		177.138	2.862		179.384	0.616		179.82	0.18		179.848	0.152		179.833	0.167		179.204	0.796		178.668	1.332			2.06967
		30	179.215	0.785		175.601	4.399		168.17	11.83		177.31	2.69		179.825	0.175		177.913	2.087		177.064	2.936		178.493	1.507		180	0		179.384	0.616		179.82	0.18		179.848	0.152		179.833	0.167		179.204	0.796		176.558	3.442			2.11747
		line	Wes 1D
		treatment	mock
			1	1comp		2	2comp		3	3comp		4	4comp		5	5comp		6	6comp		7	7comp		8	8comp		9	9comp		10	10comp		11	11comp		12	12comp		13	13comp		14	14comp		15	15comp			average
		1	9.52	170.48		4.56	175.44		3.489	176.511		13.325	166.675		3.366	176.634		4.819	175.181		5.845	174.155		6.801	173.199		7.282	172.718		3.292	176.708		4.001	175.999		2.862	177.138		3.954	176.046		4.028	175.972		2.045	177.955			174.721
		2	34.095	145.905		18.252	161.748		40.162	139.838		26.565	153.435		26.194	153.806		20.12	159.88		34.759	145.241		34.479	145.521		48.366	131.634		11.725	168.275		40.4	139.6		7.224	172.776		14.036	165.964		8.896	171.104		23.199	156.801			154.102
		3	65.659	114.341		56.31	123.69		41.186	138.814		47.94	132.06		46.693	133.307		24.274	155.726		45.266	134.734		63.947	116.053		76.034	103.966		140.648	39.352		56.352	123.648		19.911	160.089		31.065	148.935		15.092	164.908		54.14	125.86			127.699
		4	67.62	112.38		85.426	94.574		61.249	118.751		58.019	121.981		45	135		24.274	155.726		70.949	109.051		126.656	53.344		112.213	67.787		126.483	53.517		81.511	98.489		26.323	153.677		24.628	155.372		28.413	151.587		69.404	110.596			112.789
		5	131.84	48.16		115.048	64.952		134.204	45.796		80.311	99.689		48.122	131.878		19.477	160.523		120.681	59.319		178.995	1.005		124.611	55.389		118.61	61.39		142.86	37.14		77.005	102.995		20.186	159.814		37.875	142.125		120.964	59.036			81.9474
		6	178.328	1.672		157.521	22.479		170.362	9.638		172.51	7.49		62.639	117.361		36.581	143.419		157.596	22.404		178.995	1.005		153.492	26.508		131.605	48.395		172.015	7.985		122.005	57.995		29.551	150.449		108.555	71.445		157.213	22.787			47.4021
		7	154.906	25.094		178.709	1.291		158.199	21.801		169.202	10.798		80.667	99.333		91.672	88.328		171.228	8.772		166.239	13.761		175.021	4.979		133.441	46.559		178.668	1.332		154.537	25.463		23.378	156.622		146.004	33.996		168.57	11.43			36.6373
		8	147.649	32.351		178.709	1.291		158.199	21.801		169.202	10.798		85.21	94.79		104.79	75.21		178.345	1.655		174.958	5.042		174.053	5.947		133.441	46.559		170.538	9.462		179.37	0.63		29.745	150.255		145.072	34.928		168.57	11.43			33.4766
		9	164.291	15.709		179.635	0.365		159.478	20.522		178.164	1.836		111.557	68.443		151.928	28.072		178.345	1.655		174.958	5.042		177.064	2.936		138.983	41.017		172.875	7.125		172.595	7.405		29.745	150.255		136.142	43.858		175.83	4.17			26.5607
		10	165.559	14.441		175.852	4.148		167.905	12.095		178.164	1.836		141.546	38.454		173.703	6.297		176.912	3.088		167.067	12.933		158.629	21.371		138.983	41.017		176.906	3.094		172.595	7.405		29.745	150.255		124.526	55.474		166.931	13.069			25.6651
		11	171.347	8.653		175.852	4.148		172.737	7.263		178.164	1.836		155.186	24.814		175.274	4.726		176.912	3.088		173.027	6.973		159.001	20.999		138.983	41.017		167.993	12.007		174.498	5.502		39.211	140.789		131.509	48.491		169.967	10.033			22.6893
		12	175.426	4.574		175.852	4.148		172.737	7.263		178.164	1.836		169.992	10.008		175.274	4.726		176.912	3.088		173.027	6.973		166.026	13.974		154.161	25.839		174.611	5.389		174.498	5.502		51.371	128.629		129.289	50.711		169.967	10.033			18.8462
		13	175.426	4.574		171.158	8.842		172.737	7.263		178.164	1.836		175.125	4.875		175.274	4.726		176.912	3.088		177.248	2.752		166.026	13.974		154.161	25.839		174.806	5.194		170.218	9.782		67.586	112.414		134.484	45.516		169.967	10.033			17.3805
		14	175.426	4.574		171.158	8.842		172.737	7.263		177.436	2.564		175.125	4.875		175.274	4.726		176.912	3.088		177.248	2.752		171.87	8.13		154.161	25.839		174.806	5.194		170.218	9.782		126.782	53.218		155.367	24.633		169.967	10.033			11.7009
		15	176.987	3.013		171.158	8.842		172.737	7.263		177.436	2.564		175.125	4.875		175.274	4.726		176.834	3.166		177.248	2.752		171.87	8.13		164.787	15.213		178.485	1.515		174.289	5.711		155.556	24.444		155.367	24.633		172.942	7.058			8.26033
		16	179.59	0.41		169.695	10.305		172.737	7.263		177.128	2.872		175.125	4.875		169.879	10.121		176.834	3.166		177.248	2.752		177.94	2.06		164.787	15.213		178.485	1.515		174.289	5.711		172.176	7.824		166.378	13.622		172.942	7.058			6.3178
		17	179.59	0.41		169.695	10.305		172.737	7.263		177.128	2.872		175.125	4.875		169.879	10.121		176.834	3.166		177.248	2.752		177.94	2.06		164.787	15.213		172.986	7.014		174.289	5.711		172.176	7.824		166.378	13.622		171.87	8.13			6.75587
		18	177.017	2.983		169.695	10.305		172.737	7.263		175.236	4.764		179.896	0.104		169.879	10.121		176.834	3.166		177.248	2.752		177.94	2.06		165.593	14.407		172.986	7.014		174.289	5.711		175.782	4.218		169.909	10.091		171.87	8.13			6.20593
		19	177.017	2.983		153.435	26.565		177.508	2.492		175.236	4.764		179.896	0.104		169.879	10.121		167.72	12.28		177.248	2.752		175.236	4.764		165.593	14.407		172.986	7.014		174.289	5.711		178.091	1.909		169.909	10.091		173.257	6.743			7.51333
		20	177.017	2.983		158.973	21.027		177.508	2.492		176.634	3.366		179.896	0.104		173.872	6.128		164.691	15.309		177.248	2.752		177.304	2.696		165.593	14.407		172.986	7.014		174.289	5.711		178.091	1.909		171.82	8.18		173.257	6.743			6.7214
		21	179.204	0.796		169.034	10.966		177.508	2.492		176.634	3.366		179.896	0.104		173.872	6.128		165.732	14.268		177.248	2.752		177.304	2.696		165.593	14.407		172.776	7.224		174.289	5.711		165.483	14.517		171.82	8.18		173.257	6.743			6.69
		22	179.204	0.796		169.034	10.966		177.508	2.492		180	0		179.102	0.898		173.872	6.128		165.732	14.268		177.248	2.752		177.304	2.696		165.593	14.407		172.776	7.224		174.842	5.158		163.284	16.716		172.51	7.49		173.257	6.743			6.58227
		23	179.204	0.796		169.034	10.966		177.508	2.492		180	0		179.102	0.898		173.872	6.128		165.732	14.268		177.248	2.752		177.304	2.696		165.593	14.407		172.776	7.224		174.842	5.158		168.465	11.535		178.825	1.175		173.257	6.743			5.81587
		24	177.215	2.785		169.034	10.966		177.508	2.492		180	0		179.102	0.898		173.872	6.128		159.944	20.056		177.248	2.752		177.304	2.696		165.593	14.407		172.776	7.224		174.842	5.158		168.465	11.535		178.825	1.175		176.84	3.16			6.09547
		25	177.215	2.785		169.034	10.966		177.508	2.492		180	0		179.102	0.898		173.872	6.128		164.699	15.301		177.248	2.752		177.304	2.696		167.471	12.529		172.776	7.224		174.842	5.158		157.834	22.166		178.825	1.175		176.84	3.16			6.362
		26	177.215	2.785		169.034	10.966		177.508	2.492		180	0		179.102	0.898		175.397	4.603		164.699	15.301		179.204	0.796		177.304	2.696		166.353	13.647		172.776	7.224		163.186	16.814		154.481	25.519		178.825	1.175		176.84	3.16			7.20507
		27	177.215	2.785		169.034	10.966		177.508	2.492		180	0		179.102	0.898		175.397	4.603		164.699	15.301		179.204	0.796		177.304	2.696		171.323	8.677		172.776	7.224		162.553	17.447		170.385	9.615		178.839	1.161		176.84	3.16			5.85473
		28	177.215	2.785		164.733	15.267		177.508	2.492		180	0		179.102	0.898		174.249	5.751		172.195	7.805		179.204	0.796		177.304	2.696		171.323	8.677		172.776	7.224		162.553	17.447		170.385	9.615		179.763	0.237		176.84	3.16			5.65667
		29	177.215	2.785		164.733	15.267		177.508	2.492		180	0		179.102	0.898		174.249	5.751		168.753	11.247		178.58	1.42		177.304	2.696		171.323	8.677		172.776	7.224		168.311	11.689		167.471	12.529		179.763	0.237		176.84	3.16			5.73813
		30	177.215	2.785		165.964	14.036		177.508	2.492		180	0		179.102	0.898		175.096	4.904		170.34	9.66		178.58	1.42		177.304	2.696		171.323	8.677		172.776	7.224		168.311	11.689		167.471	12.529		179.763	0.237		172.875	7.125			5.75813
[truncated: 2 more columns]

## Sheet: Figure 3C
20180906
LED lamp (faster opening)
		line	WT
		treatment	DMSO	2			3			4			5			9			10			12			1			2			4			5			9
			1	1comp		2	2comp		3	3comp		4	4comp		5	5comp		6	6comp		7	7comp		8	8comp		9	9comp		10	10comp		11	11comp		12	12comp		13	13comp		14	14comp		15	15comp			average
		1	0	180		0	180		0	180		0	180		0	180		0	180		0	180		0	180		0	180		0	180		0	180		0	180		0	180		37.1	142.9						177.35
		2	0	180		0	180		0	180		0	180		0	180		0	180		0	180		0	180		0	180		0	180		0	180		0	180		40.129	139.871		61.06	118.94						172.772
		3	0	180		0	180		16.211	163.789		0	180		0	180		0	180		0	180		0	180		0	180		0	180		0	180		0	180		78.69	101.31		72.255	107.745						168.06
		4	0	180		0	180		25.989	154.011		0	180		0	180		0	180		0	180		0	180		0	180		0	180		0	180		0	180		81.315	98.685		72.699	107.301						167.143
		5	0	180		0	180		70.742	109.258		62.763	117.237		49.554	130.446		32.905	147.095		0	180		0	180		0	180		0	180		0	180		0	180		105.945	74.055		83.594	96.406						151.036
		6	0	180		0	180		99.462	80.538		106.39	73.61		100.374	79.626		72.501	107.499		0	180		0	180		0	180		0	180		0	180		0	180		99.555	80.445		86.424	93.576						139.664
		7	73.185	106.815		0	180		129.017	50.983		122.811	57.189		125.924	54.076		95.194	84.806		60.484	119.516		0	180		0	180		0	180		0	180		0	180		111.371	68.629		100.491	79.509						121.537
		8	90	90		27.329	152.671		148.671	31.329		140.105	39.895		141.583	38.417		104.452	75.548		65.854	114.146		104.116	75.884		0	180		70.56	109.44		0	180		46.818	133.182		139.807	40.193		116.442	63.558						94.5902
		9	100.795	79.205		68.639	111.361		169.326	10.674		140.105	39.895		145.408	34.592		120.964	59.036		87.709	92.291		112.38	67.62		81.841	98.159		77.961	102.039		62.935	117.065		50.648	129.352		132.955	47.045		118.909	61.091						74.9589
		10	123.649	56.351		95.074	84.926		179.561	0.439		133.458	46.542		148.774	31.226		141.311	38.689		110.659	69.341		99.219	80.781		100.305	79.695		110.327	69.673		65.34	114.66		58.891	121.109		128.694	51.306		128.218	51.782						64.0371
		11	151.318	28.682		167.093	12.907		180	0		115.596	64.404		160.215	19.785		157.457	22.543		125.676	54.324		112.249	67.751		123.69	56.31		139.209	40.791		81.027	98.973		85.723	94.277		144.782	35.218		134.019	45.981						45.8533
		12	175.815	4.185		178.788	1.212		180	0		155.344	24.656		173.764	6.236		171.085	8.915		147.103	32.897		128.733	51.267		141.384	38.616		153.435	26.565		87.117	92.883		105.642	74.358		133.264	46.736		126.177	53.823						33.0249
		13	177.887	2.113		180	0		180	0		173.112	6.888		178.152	1.848		174.958	5.042		180	0		132.189	47.811		173.452	6.548		179.642	0.358		99.462	80.538		155.868	24.132		146.117	33.883		152.864	27.136						16.8784
		14	180	0		180	0		180	0		180	0		180	0		179.128	0.872		180	0		145.966	34.034		180	0		180	0		108.435	71.565		176.496	3.504		140.349	39.651		156.306	23.694						12.38
		15	180	0		180	0		180	0		180	0		180	0		180	0		180	0		146.31	33.69		180	0		180	0		104.349	75.651		180	0		159.928	20.072		172.513	7.487						9.77857
		16	180	0		180	0		180	0		180	0		180	0		180	0		180	0		145.095	34.905		180	0		180	0		117.777	62.223		180	0		145.235	34.765		180	0						9.42093
		17	180	0		180	0		180	0		180	0		180	0		180	0		180	0		175.316	4.684		180	0		180	0		144.251	35.749		180	0		153.033	26.967		180	0						4.81429
		18	180	0		180	0		180	0		180	0		180	0		180	0		180	0		180	0		180	0		180	0		142.8	37.2		180	0		165.735	14.265		180	0						3.67607
		19	180	0		180	0		180	0		180	0		180	0		180	0		180	0		180	0		180	0		180	0		176.606	3.394		180	0		172.933	7.067		180	0						0.747214
		20	180	0		180	0		180	0		180	0		180	0		180	0		180	0		180	0		180	0		180	0		180	0		180	0		180	0		180	0						0
		21	180	0		180	0		180	0		180	0		180	0		180	0		180	0		180	0		180	0		180	0		180	0		180	0		180	0		180	0						0
		22	180	0		180	0		180	0		180	0		180	0		180	0		180	0		180	0		180	0		180	0		180	0		180	0		180	0		180	0						0
		23	180	0		180	0		180	0		180	0		180	0		180	0		180	0		180	0		180	0		180	0		180	0		180	0		180	0		180	0						0
		24	180	0		180	0		180	0		180	0		180	0		180	0		180	0		180	0		180	0		180	0		180	0		180	0		180	0		180	0						0
		25																																															#DIV/0!
		26																																															#DIV/0!
		27																																															#DIV/0!
		28																																															#DIV/0!
		29																																															#DIV/0!
		30																																															#DIV/0!
		line	ful-7
		treatment	DMSO	1			3			4			9			10			11			12			2			5			6			7			8			9			12
			1	1comp		2	2comp		3	3comp		4	4comp		5	5comp		6	6comp		7	7comp		8	8comp		9	9comp		10	10comp		11	11comp		12	12comp		13	13comp		14	14comp		15	15comp			average
		1	0	180		0	180		0	180		0	180		0	180		0	180		0	180		0	180		0	180		0	180		0	180		0	180		39.853	140.147		0	180						177.153
		2	68.439	111.561		60.341	119.659		0	180		54.462	125.538		71.03	108.97		0	180		49.764	130.236		0	180		0	180		50.724	129.276		0	180		62.54	117.46		70.739	109.261		0	180						145.14
		3	58.935	121.065		55.67	124.33		47.849	132.151		55.655	124.345		122.781	57.219		0	180		49.764	130.236		0	180		0	180		85.426	94.574		51.34	128.66		92.61	87.39		95.194	84.806		0	180						128.913
		4	87.543	92.457		88.485	91.515		81.312	98.688		128.011	51.989		98.13	81.87		0	180		51.34	128.66		0	180		119.055	60.945		91.286	88.714		53.163	126.837		87.51	92.49		116.427	63.573		0	180						108.41
		5	131.149	48.851		108.566	71.434		102.754	77.246		168.056	11.944		120.624	59.376		50.147	129.853		51.34	128.66		37.694	142.306		159.944	20.056		114.444	65.556		78.024	101.976		93.576	86.424		165.919	14.081		0	180						81.2688
		6	134.642	45.358		108.435	71.565		107.5	72.5		146.952	33.048		133.452	46.548		112.166	67.834		44.929	135.071		60.158	119.842		163.618	16.382		107.319	72.681		85.189	94.811		113.769	66.231		180	0		41.689	138.311						70.013
		7	154.253	25.747		149.528	30.472		111.214	68.786		171.641	8.359		133.152	46.848		135	45		58.604	121.396		91.626	88.374		178.99	1.01		130.561	49.439		90.251	89.749		130.601	49.399		180	0		53.13	126.87						53.6749
		8	177.663	2.337		149.385	30.615		111.341	68.659		177.318	2.682		142.088	37.912		169.56	10.44		79.132	100.868		108.488	71.512		180	0		134.335	45.665		80.553	99.447		159.054	20.946		180	0		65.925	114.075						43.2256
		9	180	0		162.607	17.393		121.329	58.671		180	0		145.634	34.366		178.315	1.685		85.051	94.949		109.804	70.196		180	0		136.212	43.788		113.238	66.762		142.224	37.776		180	0		74.536	105.464						37.9321
		10	180	0		177.955	2.045		118.282	61.718		180	0		147.555	32.445		179.333	0.667		110.583	69.417		125.727	54.273		180	0		150.354	29.646		122.471	57.529		143.016	36.984		180	0		84.13	95.87						31.471
		11	180	0		180	0		117.401	62.599		180	0		157.449	22.551		180	0		110.225	69.775		127.512	52.488		180	0		150.945	29.055		179.194	0.806		180	0		180	0		134.246	45.754						20.2163
		12	180	0		180	0		175.73	4.27		180	0		180	0		180	0		124.967	55.033		130.907	49.093		180	0		154.571	25.429		180	0		180	0		180	0		134.246	45.754						12.8271
		13	180	0		180	0		177.58	2.42		180	0		180	0		180	0		145.532	34.468		129.373	50.627		180	0		180	0		180	0		180	0		180	0		178.958	1.042						6.3255
		14	180	0		180	0		180	0		180	0		180	0		180	0		142.734	37.266		133.056	46.944		180	0		180	0		180	0		180	0		180	0		180	0						6.015
		15	180	0		180	0		180	0		180	0		180	0		180	0		150.255	29.745		147.529	32.471		180	0		180	0		180	0		180	0		180	0		180	0						4.444
		16	180	0		180	0		180	0		180	0		180	0		180	0		180	0		150.156	29.844		180	0		180	0		180	0		180	0		180	0		180	0						2.13171
		17	180	0		180	0		180	0		180	0		180	0		180	0		180	0		167.797	12.203		180	0		180	0		180	0		180	0		180	0		180	0						0.871643
		18	180	0		180	0		180	0		180	0		180	0		180	0		180	0		180	0		180	0		180	0		180	0		180	0		180	0		180	0						0
		19	180	0		180	0		180	0		180	0		180	0		180	0		180	0		180	0		180	0		180	0		180	0		180	0		180	0		180	0						0
		20	180	0		180	0		180	0		180	0		180	0		180	0		180	0		180	0		180	0		180	0		180	0		180	0		180	0		180	0						0
		21	180	0		180	0		180	0		180	0		180	0		180	0		180	0		180	0		180	0		180	0		180	0		180	0		180	0		180	0						0
		22	180	0		180	0		180	0		180	0		180	0		180	0		180	0		180	0		180	0		180	0		180	0		180	0		180	0		180	0						0
		23	180	0		180	0		180	0		180	0		180	0		180	0		180	0		180	0		180	0		180	0		180	0		180	0		180	0		180	0						0
		24	180	0		180	0		180	0		180	0		180	0		180	0		180	0		180	0		180	0		180	0		180	0		180	0		180	0		180	0						0
		25																																															#DIV/0!
		26																																															#DIV/0!
		27																																															#DIV/0!
		28																																															#DIV/0!
		29																																															#DIV/0!
		30																																															#DIV/0!
20180726
LED lamp (faster opening)		line	WT
		treatment	DMSO
			1	1comp		2	2comp		3	3comp		4	4comp		5	5comp		6	6comp		7	7comp		8	8comp		9	9comp		10	10comp		11	11comp		12	12comp		13	13comp		14	14comp		15	15comp			average
		1	0.126	179.874		0.271	179.729		0.393	179.607		0	180		0.182	179.818		0	180		0	180		0.242	179.758		8.111	171.889		0	180		31.739	148.261		0.785	179.215		0	180		13.919	166.081		0	180			176.282
		2	0	180		4.71	175.29		49.752	130.248		0	180		0.085	179.915		0	180		0	180		4.706	175.294		31.357	148.643		0	180		31.739	148.261		0.785	179.215		0	180		13.919	166.081		0	180			170.863
		3	1.123	178.877		4.71	175.29		49.752	130.248		1.192	178.808		0.397	179.603		0.346	179.654		16.123	163.877		20.391	159.609		67.902	112.098		12.324	167.676		41.582	138.418		52.058	127.942		0	180		48.616	131.384		1.042	178.958			158.829
		4	1.123	178.877		4.71	175.29		56.597	123.403		36.87	143.13		0.693	179.307		0	180		19.434	160.566		83.031	96.969		52.651	127.349		66.297	113.703		51.361	128.639		45	135		12.319	167.681		35.598	144.402		80.756	99.244			143.571
		5	0	180		0	180		80.612	99.388		94.028	85.972		0.693	179.307		0	180		36.084	143.916		75.303	104.697		56.449	123.551		69.717	110.283		43.132	136.868		31.442	148.558		31.703	148.297		30.895	149.105		103.241	76.759			136.447
		6	7.472	172.528		77.005	102.995		135	45		129.949	50.051		0.545	179.455		0.542	179.458		107.871	72.129		97.454	82.546		60.741	119.259		73.191	106.809		43.506	136.494		31.442	148.558		20.518	159.482		29.682	150.318		120.108	59.892			117.665
		7	11.809	168.191		77.005	102.995		152.592	27.408		161.74	18.26		15.226	164.774		47.25	132.75		140.058	39.942		88.264	91.736		97.096	82.904		63.435	116.565		48.814	131.186		41.118	138.882		39.218	140.782		26.988	153.012		155.225	24.775			102.277
		8	11.809	168.191		86.053	93.947		166.866	13.134		161.74	18.26		26.118	153.882		92.726	87.274		86.024	93.976		116.415	63.585		111.977	68.023		65.46	114.54		86.558	93.442		41.118	138.882		28.33	151.67		33.941	146.059		128.991	51.009			97.0583
		9	60.23	119.77		110.495	69.505		180	0		138.306	41.694		41.987	138.013		170.134	9.866		113.344	66.656		169.509	10.491		149.331	30.669		65.46	114.54		105.255	74.745		38.295	141.705		132.544	47.456		33.941	146.059		140.348	39.652			70.0547
		10	70.201	109.799		159.501	20.499		180	0		134.45	45.55		56.497	123.503		179.38	0.62		113.344	66.656		179.465	0.535		131.121	48.879		74.753	105.247		112.848	67.152		40.601	139.399		176.919	3.081		30.669	149.331		178.603	1.397			58.7765
		11	91.245	88.755		174.195	5.805		180	0		143.868	36.132		45.913	134.087		180	0		108.789	71.211		180	0		157.834	22.166		177.936	2.064		179.584	0.416		95.771	84.229		178.971	1.029		31.835	148.165		180	0			39.6039
		12	110.69	69.31		177.726	2.274		180	0		144.866	35.134		178.723	1.277		180	0		108.789	71.211		180	0		173.56	6.44		178.305	1.695		180	0		126.741	53.259		180	0		54.444	125.556		180	0			24.4104
		13	110.69	69.31		180	0		180	0		175.651	4.349		178.746	1.254		180	0		143.616	36.384		180	0		178.944	1.056		180	0		180	0		116.872	63.128		180	0		82.115	97.885		180	0			18.2244
		14	137.749	42.251		180	0		180	0		176.616	3.384		177.274	2.726		180	0		173.948	6.052		180	0		180	0		180	0		180	0		156.753	23.247		180	0		97.193	82.807		180	0			10.6978
		15	137.749	42.251		180	0		180	0		178.856	1.144		180	0		180	0		178.264	1.736		180	0		180	0		180	0		180	0		157.582	22.418		180	0		145.739	34.261		180	0			6.78733
		16	175.024	4.976		180	0		180	0		180	0		180	0		180	0		180	0		180	0		180	0		180	0		180	0		177.709	2.291		180	0		171.793	8.207		180	0			1.0316
		17	175.024	4.976		180	0		180	0		180	0		180	0		180	0		180	0		180	0		180	0		180	0		180	0		180	0		180	0		178.481	1.519		180	0			0.433
		18	180	0		180	0		180	0		180	0		180	0		180	0		180	0		180	0		180	0		180	0		180	0		180	0		180	0		180	0		180	0			0
		19	180	0		180	0		180	0		180	0		180	0		180	0		180	0		180	0		180	0		180	0		180	0		180	0		180	0		180	0		180	0			0
		20	180	0		180	0		180	0		180	0		180	0		180	0		180	0		180	0		180	0		180	0		180	0		180	0		180	0		180	0		180	0			0
		21	180	0		180	0		180	0		180	0		180	0		180	0		180	0		180	0		180	0		180	0		180	0		180	0		180	0		180	0		180	0			0
		22	180	0		180	0		180	0		180	0		180	0		180	0		180	0		180	0		180	0		180	0		180	0		180	0		180	0		180	0		180	0			0
		23	180	0		180	0		180	0		180	0		180	0		180	0		180	0		180	0		180	0		180	0		180	0		180	0		180	0		180	0		180	0			0
		24	180	0		180	0		180	0		180	0		180	0		180	0		180	0		180	0		180	0		180	0		180	0		180	0		180	0		180	0		180	0			0
		25																																															#DIV/0!
		26																																															#DIV/0!
		27																																															#DIV/0!
		28																																															#DIV/0!
		29																																															#DIV/0!
		30																																															#DIV/0!
		line	Ful 7
		treatment	DMSO
			1	1comp		2	2comp		3	3comp		4	4comp		5	5comp		6	6comp		7	7comp		8	8comp		9	9comp		10	10comp		11	11comp		12	12comp		13	13comp		14	14comp		15	15comp			average
		1	34.992	145.008		0	180		7.752	172.248		5.208	174.792		0	180		4.865	175.135		15.59	164.41		1.696	178.304		62.453	117.547		5.29	174.71		13.055	166.945		17.699	162.301		63.435	116.565		47.447	132.553		0	180			161.368
		2	47.045	132.955		0	180		29.228	150.772		23.01	156.99		19.544	160.456		15.115	164.885		30.252	149.748		23.33	156.67		79.73	100.27		26.208	153.792		23.962	156.038		73.113	106.887		38.157	141.843		90	90		0	180			145.42
		3	85.815	94.185		30.013	149.987		66.289	113.711		103.285	76.715		46.64	133.36		29.657	150.343		62.453	117.547		66.038	113.962		93.515	86.485		93.749	86.251		73.147	106.853		101.31	78.69		57.866	122.134		108.435	71.565		9.189	170.811			111.507
		4	92.39	87.61		30.013	149.987		71.378	108.622		103.285	76.715		46.64	133.36		56.168	123.832		102.837	77.163		78.418	101.582		112.952	67.048		86.689	93.311		89.705	90.295		135	45		80.811	99.189		136.032	43.968		8.799	171.201			97.9255
		5	145.712	34.288		57.995	122.005		83.574	96.426		103.285	76.715		81.254	98.746		55.123	124.877		117.313	62.687		101.477	78.523		114.801	65.199		91.79	88.21		118.443	61.557		132.181	47.819		77.471	102.529		177.254	2.746		20.072	159.928			81.4837
		6	152.868	27.132		41.82	138.18		85.914	94.086		105.086	74.914		80.134	99.866		56.453	123.547		142.645	37.355		146.979	33.021		113.278	66.722		81.76	98.24		180	0		160.47	19.53		94.615	85.385		180	0		15.542	164.458			70.8291
		7	170.789	9.211		58.513	121.487		98.653	81.347		147.653	32.347		80.134	99.866		81.698	98.302		148.88	31.12		175.685	4.315		130.236	49.764		82.747	97.253		180	0		149.394	30.606		113.286	66.714		180	0		21.659	158.341			58.7115
		8	177.779	2.221		78.325	101.675		116.565	63.435		147.653	32.347		103.841	76.159		105.09	74.91		180	0		178.668	1.332		146.365	33.635		112.438	67.562		180	0		159.912	20.088		112.808	67.192		180	0		59.943	120.057			44.0409
		9	180	0		110.41	69.59		145.491	34.509		180	0		93.576	86.424		130.041	49.959		180	0		180	0		150.945	29.055		109.647	70.353		180	0		174.74	5.26		141.534	38.466		180	0		92.412	87.588			31.4136
		10	180	0		108.435	71.565		139.728	40.272		180	0		137.273	42.727		118.811	61.189		180	0		180	0		178.524	1.476		154.581	25.419		180	0		161.137	18.863		129.13	50.87		180	0		122.276	57.724			24.6737
		11	180	0		123.085	56.915		147.659	32.341		180	0		143.773	36.227		131.869	48.131		180	0		180	0		180	0		177.797	2.203		180	0		175.197	4.803		129.13	50.87		180	0		154.654	25.346			17.1224
		12	180	0		121.58	58.42		164.358	15.642		180	0		178.452	1.548		135	45		180	0		180	0		180	0		180	0		180	0		169.771	10.229		157.311	22.689		180	0		180	0			10.2352
		13	180	0		179.901	0.099		177.397	2.603		180	0		180	0		145.176	34.824		180	0		180	0		180	0		180	0		180	0		178.286	1.714		157.311	22.689		180	0		180	0			4.1286
		14	180	0		180	0		180	0		180	0		180	0		135.535	44.465		180	0		180	0		180	0		180	0		180	0		180	0		179.774	0.226		180	0		180	0			2.9794
		15	180	0		180	0		180	0		180	0		180	0		180	0		180	0		180	0		180	0		180	0		180	0		180	0		180	0		180	0		180	0			0
		16	180	0		180	0		180	0		180	0		180	0		180	0		180	0		180	0		180	0		180	0		180	0		180	0		180	0		180	0		180	0			0
		17	180	0		180	0		180	0		180	0		180	0		180	0		180	0		180	0		180	0		180	0		180	0		180	0		180	0		180	0		180	0			0
		18	180	0		180	0		180	0		180	0		180	0		180	0		180	0		180	0		180	0		180	0		180	0		180	0		180	0		180	0		180	0			0
		19	180	0		180	0		180	0		180	0		180	0		180	0		180	0		180	0		180	0		180	0		180	0		180	0		180	0		180	0		180	0			0
		20	180	0		180	0		180	0		180	0		180	0		180	0		180	0		180	0		180	0		180	0		180	0		180	0		180	0		180	0		180	0			0
		21	180	0		180	0		180	0		180	0		180	0		180	0		180	0		180	0		180	0		180	0		180	0		180	0		180	0		180	0		180	0			0
		22	180	0		180	0		180	0		180	0		180	0		180	0		180	0		180	0		180	0		180	0		180	0		180	0		180	0		180	0		180	0			0
		23	180	0		180	0		180	0		180	0		180	0		180	0		180	0		180	0		180	0		180	0		180	0		180	0		180	0		180	0		180	0			0
		24	180	0		180	0		180	0		180	0		180	0		180	0		180	0		180	0		180	0		180	0		180	0		180	0		180	0		180	0		180	0			0
		25																																															#DIV/0!
		26																																															#DIV/0!
		27																																															#DIV/0!
		28																																															#DIV/0!
		29																																															#DIV/0!
		30																																															#DIV/0!
20180719
LED lamp (faster opening)		line	WT
		treatment	keine
			1	1comp		2	2comp		3	3comp		4	4comp		5	5comp		6	6comp		7	7comp		8	8comp		9	9comp		10	10comp		11	11comp		12	12comp		13	13comp		14	14comp		15	15comp			average
		1	0	180		0.472	179.528		0.175	179.825		0	180		5.18	174.82		32.755	147.245		0	180		0	180		5.7	174.3		0.017	179.983		0.69	179.31		5.432	174.568		0.519	179.481		0.158	179.842		0.98	179.02			176.528
		2	26.71	153.29		6.746	173.254		6.215	173.785		45	135		25.017	154.983		77.713	102.287		1.169	178.831		0.848	179.152		11.579	168.421		16.653	163.347		0.516	179.484		5.721	174.279		0.714	179.286		0.415	179.585		0.416	179.584			164.971
		3	87.469	92.531		89.179	90.821		146.31	33.69		117.238	62.762		38.66	141.34		129.976	50.024		59.636	120.364		78.294	101.706		43.337	136.663		39.56	140.44		1.22	178.78		22.309	157.691		3.876	176.124		3.133	176.867		83.704	96.296			117.073
		4	110.37	69.63		104.186	75.814		142.815	37.185		112.15	67.85		38.66	141.34		149.216	30.784		59.636	120.364		101.31	78.69		43.337	136.663		57.897	122.103		9.029	170.971		28.369	151.631		9.44	170.56		3.133	176.867		98.344	81.656			108.807
		5	128.355	51.645		134.79	45.21		143.933	36.067		121.654	58.346		33.773	146.227		143.396	36.604		72.643	107.357		85.503	94.497		43.337	136.663		57.897	122.103		36.412	143.588		37.359	142.641		10.665	169.335		3.133	176.867		126.69	53.31			101.364
		6	121.102	58.898		122.196	57.804		156.801	23.199		144.951	35.049		35.293	144.707		150.018	29.982		77.574	102.426		91.685	88.315		60.709	119.291		39.102	140.898		40.78	139.22		25.542	154.458		16.425	163.575		30.141	149.859		163.926	16.074			94.917
		7	129.596	50.404		130.009	49.991		165.619	14.381		144.951	35.049		107.103	72.897		137.726	42.274		93.894	86.106		91.828	88.172		105.945	74.055		36.079	143.921		61.526	118.474		28.438	151.562		18.392	161.608		26.705	153.295		175.943	4.057			83.0831
		8	145.855	34.145		145.571	34.429		165.964	14.036		146.31	33.69		111.82	68.18		151.228	28.772		105.113	74.887		96.74	83.26		105.945	74.055		29.937	150.063		64.684	115.316		29.662	150.338		42.614	137.386		62.678	117.322		177.005	2.995			74.5916
		9	157.547	22.453		164.055	15.945		180	0		164.578	15.422		126.8	53.2		177.829	2.171		149.456	30.544		115.877	64.123		149.824	30.176		65.381	114.619		81.87	98.13		40.866	139.134		67.751	112.249		75.75	104.25		177.005	2.995			53.6941
		10	173.429	6.571		176.186	3.814		180	0		166.608	13.392		177.605	2.395		177.829	2.171		141.548	38.452		139.185	40.815		160.56	19.44		67.543	112.457		87.413	92.587		77.525	102.475		98.206	81.794		93.919	86.081		172.395	7.605			40.6699
		11	177.134	2.866		180	0		180	0		180	0		178.209	1.791		180	0		156.176	23.824		180	0		177.6	2.4		94.36	85.64		100.82	79.18		110.988	69.012		140.014	39.986		107.103	72.897		170.485	9.515			25.8074
		12	180	0		180	0		180	0		180	0		180	0		180	0		166.695	13.305		180	0		179.409	0.591		120.641	59.359		100.82	79.18		128.3	51.7		140.961	39.039		152.19	27.81		179.684	0.316			18.0867
		13	180	0		180	0		180	0		180	0		180	0		180	0		173.317	6.683		180	0		180	0		120.641	59.359		123.118	56.882		141.068	38.932		152.049	27.951		152.19	27.81		180	0			14.5078
		14	180	0		180	0		180	0		180	0		180	0		180	0		179.36	0.64		180	0		180	0		154.111	25.889		124.216	55.784		177.874	2.126		131.295	48.705		169.319	10.681		180	0			9.58833
		15	180	0		180	0		180	0		180	0		180	0		180	0		180	0		180	0		180	0		131.117	48.883		134.725	45.275		179.734	0.266		174.351	5.649		122.229	57.771		180	0			10.5229
		16	180	0		180	0		180	0		180	0		180	0		180	0		180	0		180	0		180	0		175.914	4.086		159.981	20.019		180	0		178.341	1.659		156.455	23.545		180	0			3.28727
		17	180	0		180	0		180	0		180	0		180	0		180	0		180	0		180	0		180	0		180	0		167.173	12.827		180	0		180	0		170.828	9.172		180	0			1.4666
		18	180	0		180	0		180	0		180	0		180	0		180	0		180	0		180	0		180	0		180	0		177.204	2.796		180	0		180	0		168.69	11.31		180	0			0.9404
		19	180	0		180	0		180	0		180	0		180	0		180	0		180	0		180	0		180	0		180	0		177.176	2.824		180	0		180	0		177.51	2.49		180	0			0.354267
		20	180	0		180	0		180	0		180	0		180	0		180	0		180	0		180	0		180	0		180	0		178.475	1.525		180	0		180	0		180	0		180	0			0.101667
		21	180	0		180	0		180	0		180	0		180	0		180	0		180	0		180	0		180	0		180	0		180	0		180	0		180	0		180	0		180	0			0
		22	180	0		180	0		180	0		180	0		180	0		180	0		180	0		180	0		180	0		180	0		180	0		180	0		180	0		180	0		180	0			0
		23	180	0		180	0		180	0		180	0		180	0		180	0		180	0		180	0		180	0		180	0		180	0		180	0		180	0		180	0		180	0			0
		24	180	0		180	0		180	0		180	0		180	0		180	0		180	0		180	0		180	0		180	0		180	0		180	0		180	0		180	0		180	0			0
		25																																															#DIV/0!
		26																																															#DIV/0!
		27																																															#DIV/0!
		28																																															#DIV/0!
		29																																															#DIV/0!
		30																																															#DIV/0!
		line	Ful7
		treatment	keine
			1	1comp		2	2comp		3	3comp		4	4comp		5	5comp		6	6comp		7	7comp		8	8comp		9	9comp		10	10comp		11	11comp		12	12comp		13	13comp		14	14comp		15	15comp			average
		1	18.038	161.962		56.212	123.788		102.641	77.359		103.241	76.759		12.503	167.497		19.904	160.096		0.582	179.418		24.327	155.673		26.277	153.723		13.719	166.281		16.439	163.561		1.234	178.766		4.764	175.236		38.194	141.806		0.141	179.859			150.786
		2	48.35	131.65		78.69	101.31		117.859	62.141		87.397	92.603		19.087	160.913		66.14	113.86		21.931	158.069		74.596	105.404		64.781	115.219		17.483	162.517		55.099	124.901		20.925	159.075		21.92	158.08		72.019	107.981		15.301	164.699			127.895
		3	160.728	19.272		93.705	86.295		113.908	66.092		106.543	73.457		55.648	124.352		135.24	44.76		17.319	162.681		89.914	90.086		153.435	26.565		40.815	139.185		154.283	25.717		55.218	124.782		49.6	130.4		87.639	92.361		42.274	137.726			89.5821
		4	162.553	17.447		134.493	45.507		115.362	64.638		128.052	51.948		57.724	122.276		135.24	44.76		48.221	131.779		113.405	66.595		132.274	47.726		163.544	16.456		180	0		68.199	111.801		117.759	62.241		113.377	66.623		42.274	137.726			65.8349
		5	162.553	17.447		155.993	24.007		176.289	3.711		178.968	1.032		57.724	122.276		179.51	0.49		48.221	131.779		139.933	40.067		132.274	47.726		149.931	30.069		180	0		85.244	94.756		137.764	42.236		109.799	70.201		38.234	141.766			51.1709
		6	162.553	17.447		180	0		176.334	3.666		177.879	2.121		102.28	77.72		179.51	0.49		95.598	84.402		139.933	40.067		112.492	67.508		159.019	20.981		180	0		148.761	31.239		178.755	1.245		175.252	4.748		38.234	141.766			32.8933
		7	162.553	17.447		180	0		180	0		176.424	3.576		102.28	77.72		180	0		95.598	84.402		161.952	18.048		124.373	55.627		174.435	5.565		180	0		180	0		180	0		176.505	3.495		62.526	117.474			25.5569
		8	144.539	35.461		180	0		180	0		180	0		92.121	87.879		180	0		95.598	84.402		161.952	18.048		130.03	49.97		177.274	2.726		180	0		180	0		180	0		157.38	22.62		93.576	86.424			25.8353
		9	159.985	20.015		180	0		180	0		180	0		92.121	87.879		180	0		95.598	84.402		179.253	0.747		133.648	46.352		180	0		180	0		180	0		180	0		178.606	1.394		107.819	72.181			20.8647
		10	159.45	20.55		180	0		180	0		180	0		118.626	61.374		180	0		137.768	42.232		180	0		153.947	26.053		180	0		180	0		180	0		180	0		180	0		138.594	41.406			12.7743
		11	174.909	5.091		180	0		180	0		180	0		143.35	36.65		180	0		170.104	9.896		180	0		141.984	38.016		180	0		180	0		180	0		180	0		180	0		140.219	39.781			8.62893
		12	179.009	0.991		180	0		180	0		180	0		159.444	20.556		180	0		166.529	13.471		180	0		154.592	25.408		180	0		180	0		180	0		180	0		180	0		178.025	1.975			4.16007
		13	180	0		180	0		180	0		180	0		174.596	5.404		180	0		161.996	18.004		180	0		154.592	25.408		180	0		180	0		180	0		180	0		180	0		178.352	1.648			3.36427
		14	180	0		180	0		180	0		180	0		179.808	0.192		180	0		163.968	16.032		180	0		168.857	11.143		180	0		180	0		180	0		180	0		180	0		180	0			1.82447
		15	180	0		180	0		180	0		180	0		180	0		180	0		171.027	8.973		180	0		171.87	8.13		180	0		180	0		180	0		180	0		180	0		180	0			1.1402
		16	180	0		180	0		180	0		180	0		180	0		180	0		179.781	0.219		180	0		177.614	2.386		180	0		180	0		180	0		180	0		180	0		180	0			0.173667
		17	180	0		180	0		180	0		180	0		180	0		180	0		180	0		180	0		180	0		180	0		180	0		180	0		180	0		180	0		180	0			0
		18	180	0		180	0		180	0		180	0		180	0		180	0		180	0		180	0		180	0		180	0		180	0		180	0		180	0		180	0		180	0			0
		19	180	0		180	0		180	0		180	0		180	0		180	0		180	0		180	0		180	0		180	0		180	0		180	0		180	0		180	0		180	0			0
		20	180	0		180	0		180	0		180	0		180	0		180	0		180	0		180	0		180	0		180	0		180	0		180	0		180	0		180	0		180	0			0
		21	180	0		180	0		180	0		180	0		180	0		180	0		180	0		180	0		180	0		180	0		180	0		180	0		180	0		180	0		180	0			0
		22	180	0		180	0		180	0		180	0		180	0		180	0		180	0		180	0		180	0		180	0		180	0		180	0		180	0		180	0		180	0			0
		23	180	0		180	0		180	0		180	0		180	0		180	0		180	0		180	0		180	0		180	0		180	0		180	0		180	0		180	0		180	0			0
		24	180	0		180	0		180	0		180	0		180	0		180	0		180	0		180	0		180	0		180	0		180	0		180	0		180	0		180	0		180	0			0
		25																																															#DIV/0!
		26																																															#DIV/0!
		27																																															#DIV/0!
		28																																															#DIV/0!
		29																																															#DIV/0!
		30																																															#DIV/0!
[truncated: 2 more columns]

## Sheet: Figure 3D
20181109
		line	Col-O-WT
		treatment
			1	1comp		2	2comp		3	3comp		4	4comp		5	5comp		6	6comp		7	7comp		8	8comp		9	9comp		10	10comp		11	11comp		12	12comp		13	13comp		14	14comp		15	15comp			average
		1	2.171	177.829		2.862	177.138		5.648	174.352		5.797	174.203		1.886	178.114		4.677	175.323		4.479	175.521		4.263	175.737		1.475	178.525		3.576	176.424		5.027	174.973		3.043	176.957		3.215	176.785		3.16	176.84		3.18	176.82			176.369
		2	9.049	170.951		16.336	163.664		6.986	173.014		7.943	172.057		10.945	169.055		6.381	173.619		7.734	172.266		9.273	170.727		8.098	171.902		12.393	167.607		20.737	159.263		3.043	176.957		17.723	162.277		12.004	167.996		5.856	174.144			169.7
		3	9.049	170.951		32.496	147.504		22.525	157.475		31.88	148.12		20.12	159.88		15.327	164.673		17.679	162.321		10.896	169.104		18.491	161.509		23.552	156.448		64.367	115.633		90	90		29.529	150.471		78.503	101.497		17.869	162.131			147.848
		4	55.491	124.509		35.574	144.426		40.236	139.764		39.685	140.315		41.084	138.916		16.645	163.355		32.306	147.694		8.189	171.811		41.186	138.814		22.899	157.101		61.26	118.74		114.444	65.556		29.529	150.471		125.727	54.273		42.447	137.553			132.887
		5	55.491	124.509		58.464	121.536		37.112	142.888		39.685	140.315		27.028	152.972		56.31	123.69		32.306	147.694		24.382	155.618		66.371	113.629		26.816	153.184		62.292	117.708		81.333	98.667		38.66	141.34		174.92	5.08		34.489	145.511			125.623
		6	77.106	102.894		77.114	102.886		35.407	144.593		39.685	140.315		28.61	151.39		64.989	115.011		73.241	106.759		36.789	143.211		59.574	120.426		36.966	143.034		45.909	134.091		79.479	100.521		47.822	132.178		158.385	21.615		34.138	145.862			120.319
		7	63.838	116.162		73.607	106.393		65.379	114.621		39.685	140.315		33.435	146.565		86.866	93.134		112.834	67.166		34.126	145.874		59.939	120.061		38.014	141.986		37.558	142.442		59.246	120.754		43.537	136.463		125.744	54.256		42.181	137.819			118.934
		8	63.838	116.162		95.618	84.382		127.037	52.963		50.249	129.751		44.896	135.104		109.134	70.866		78.188	101.812		50.395	129.605		56.479	123.521		46.273	133.727		72.031	107.969		68.106	111.894		34.365	145.635		126.027	53.973		32.082	147.918			109.685
		9	102.829	77.171		86.61	93.39		163.652	16.348		51.623	128.377		52.139	127.861		108.786	71.214		112.601	67.399		59.036	120.964		76.43	103.57		25.984	154.016		81.193	98.807		72.654	107.346		31.058	148.942		113.07	66.93		26.2	153.8			102.409
		10	113.77	66.23		136.796	43.204		175.03	4.97		61.699	118.301		69.444	110.556		116.732	63.268		127.863	52.137		107.354	72.646		113.824	66.176		32.638	147.362		81.193	98.807		69.553	110.447		37.875	142.125		113.07	66.93		29.352	150.648			87.5871
		11	121.139	58.861		156.371	23.629		157.628	22.372		77.471	102.529		83.766	96.234		125.737	54.263		127.863	52.137		107.354	72.646		123.69	56.31		71.565	108.435		68.616	111.384		78.366	101.634		33.336	146.664		108.32	71.68		23.933	156.067			82.323
		12	140.38	39.62		156.371	23.629		141.52	38.48		84.881	95.119		105.313	74.687		147.724	32.276		127.863	52.137		122.296	57.704		139.185	40.815		102.426	77.574		64.058	115.942		78.366	101.634		40.704	139.296		116.196	63.804		28.824	151.176			73.5929
		13	154.832	25.168		169.38	10.62		136.03	43.97		101.524	78.476		127.224	52.776		153.435	26.565		138.196	41.804		122.296	57.704		148.912	31.088		122.471	57.529		54.926	125.074		88.21	91.79		67.658	112.342		117.474	62.526		41.605	138.395			63.7218
		14	174.905	5.095		169.38	10.62		157.479	22.521		125.976	54.024		167.574	12.426		160.493	19.507		144.638	35.362		131.379	48.621		168.357	11.643		135.47	44.53		86.934	93.066		88.21	91.79		87.852	92.148		117.474	62.526		73.509	106.491			47.358
		15	174.905	5.095		179.424	0.576		153.509	26.491		125.976	54.024		162.591	17.409		164.157	15.843		144.638	35.362		131.379	48.621		168.357	11.643		135	45		107.889	72.111		88.21	91.79		96.93	83.07		135.49	44.51		96.404	83.596			42.3427
		16	174.637	5.363		179.424	0.576		161.075	18.925		145.408	34.592		169.624	10.376		169.45	10.55		158.148	21.852		141.808	38.192		172.875	7.125		140.711	39.289		125.951	54.049		108.563	71.437		105.772	74.228		142.765	37.235		120.724	59.276			32.2043
		17	177.274	2.726		179.454	0.546		156.346	23.654		145.408	34.592		172.786	7.214		173.991	6.009		152.021	27.979		148.544	31.456		172.875	7.125		146.31	33.69		140.845	39.155		108.563	71.437		174.162	5.838		148.526	31.474		148.707	31.293			23.6125
		18	177.274	2.726		179.454	0.546		161.388	18.612		154.61	25.39		178.315	1.685		173.991	6.009		161.961	18.039		148.544	31.456		171.601	8.399		165.964	14.036		146.104	33.896		114.934	65.066		174.162	5.838		163.798	16.202		158.199	21.801			17.9801
		19	177.274	2.726		179.454	0.546		161.388	18.612		154.693	25.307		179.784	0.216		164.187	15.813		173.804	6.196		151.557	28.443		167.471	12.529		165.964	14.036		146.104	33.896		114.934	65.066		177.955	2.045		172.875	7.125		177.656	2.344			15.66
		20	177.274	2.726		179.454	0.546		161.388	18.612		144.602	35.398		179.784	0.216		164.187	15.813		173.804	6.196		150.626	29.374		173.66	6.34		179.05	0.95		159.944	20.056		129.806	50.194		178.056	1.944		176.987	3.013		177.656	2.344			12.9148
		21	177.274	2.726		179.454	0.546		161.388	18.612		155.014	24.986		178.462	1.538		169.818	10.182		178.025	1.975		163.663	16.337		173.66	6.34		179.05	0.95		159.944	20.056		138.945	41.055		173.007	6.993		176.987	3.013		171.671	8.329			10.9092
		22	177.274	2.726		179.454	0.546		161.388	18.612		155.014	24.986		179.086	0.914		175.115	4.885		179.134	0.866		163.663	16.337		173.66	6.34		179.05	0.95		159.944	20.056		150.803	29.197		173.007	6.993		176.987	3.013		177.917	2.083			9.2336
		23	178.616	1.384		179.454	0.546		161.388	18.612		159.874	20.126		179.086	0.914		176.222	3.778		178.781	1.219		163.663	16.337		169.992	10.008		179.714	0.286		159.944	20.056		161.25	18.75		177.221	2.779		176.219	3.781		177.917	2.083			8.04393
		24	178.616	1.384		179.454	0.546		161.388	18.612		159.874	20.126		179.086	0.914		176.222	3.778		178.781	1.219		168.378	11.622		169.992	10.008		179.714	0.286		165.114	14.886		169.133	10.867		177.221	2.779		176.219	3.781		166.213	13.787			7.63967
		25	178.616	1.384		174.958	5.042		170.042	9.958		159.874	20.126		176.934	3.066		174.495	5.505		170.177	9.823		168.378	11.622		169.992	10.008		179.714	0.286		165.114	14.886		169.133	10.867		177.221	2.779		176.219	3.781		170.074	9.926			7.93727
		26	176.309	3.691		178.363	1.637		170.042	9.958		159.874	20.126		176.934	3.066		174.495	5.505		179.178	0.822		175.64	4.36		172.235	7.765		179.714	0.286		165.114	14.886		169.133	10.867		172.875	7.125		178.244	1.756		176.262	3.738			6.37253
		27	178.493	1.507		178.363	1.637		176.987	3.013		163.424	16.576		176.634	3.366		177.935	2.065		179.178	0.822		175.64	4.36		176.634	3.366		179.714	0.286		163.183	16.817		169.133	10.867		172.875	7.125		170.772	9.228		176.262	3.738			5.65153
		28	179.109	0.891		178.493	1.507		176.987	3.013		163.424	16.576		179.31	0.69		177.935	2.065		179.178	0.822		175.628	4.372		176.634	3.366		179.714	0.286		163.183	16.817		172.273	7.727		176.634	3.366		175.426	4.574		178.909	1.091			4.47753
		29	179.109	0.891		178.493	1.507		180	0		163.424	16.576		179.31	0.69		177.935	2.065		179.178	0.822		175.628	4.372		176.634	3.366		179.714	0.286		154.199	25.801		172.273	7.727		176.634	3.366		171.703	8.297		176.474	3.526			5.28613
		30	179.109	0.891		178.493	1.507		180	0		163.664	16.336		179.31	0.69		177.935	2.065		177.562	2.438		175.628	4.372		176.634	3.366		179.714	0.286		162.206	17.794		172.273	7.727		175.914	4.086		171.703	8.297		176.186	3.814			4.91127
		line	ful-2
		treatment
			1	1comp		2	2comp		3	3comp		4	4comp		5	5comp		6	6comp		7	7comp		8	8comp		9	9comp		10	10comp		11	11comp		12	12comp		13	13comp		14	14comp		15	15comp			average
		1	4.309	175.691		6.724	173.276		1.78	178.22		3.001	176.999		6.009	173.991		4.946	175.054		2.54	177.46		2.837	177.163		4.25	175.75		2.203	177.797		2.337	177.663		3.357	176.643		4.635	175.365		1.401	178.599		4.635	175.365			176.336
		2	27.81	152.19		12.324	167.676		19.055	160.945		3.001	176.999		12.221	167.779		5.517	174.483		13.61	166.39		11.583	168.417		13.13	166.87		6.249	173.751		11.243	168.757		7.66	172.34		5.87	174.13		8.13	171.87		12.369	167.631			168.682
		3	27.419	152.581		39.094	140.906		19.822	160.178		18.208	161.792		18.189	161.811		33.086	146.914		40.965	139.035		22.903	157.097		15.008	164.992		10.62	169.38		11.243	168.757		17.246	162.754		16.783	163.217		42.397	137.603		14.456	165.544			156.837
		4	80.362	99.638		108.677	71.323		22.438	157.562		22.834	157.166		29.653	150.347		43.894	136.106		50.528	129.472		49.793	130.207		23.385	156.615		15.116	164.884		13.722	166.278		30.988	149.012		14.477	165.523		38.942	141.058		27.897	152.103			141.82
		5	82.02	97.98		103.173	76.827		27.112	152.888		80.074	99.926		33.637	146.363		49.777	130.223		59.821	120.179		47.291	132.709		49.279	130.721		29.524	150.476		26.053	153.947		20.772	159.228		23.697	156.303		54.808	125.192		39.472	140.528			131.566
		6	91.504	88.496		115.53	64.47		43.816	136.184		80.074	99.926		29.545	150.455		60.498	119.502		68.419	111.581		67.122	112.878		57.833	122.167		49.399	130.601		23.199	156.801		27.499	152.501		20.543	159.457		41.979	138.021		43.943	136.057			125.273
		7	112.072	67.928		104.47	75.53		45	135		129.003	50.997		36.87	143.13		71.878	108.122		84.094	95.906		70.671	109.329		71.492	108.508		47.997	132.003		34.055	145.945		80.074	99.926		19.44	160.56		44.685	135.315		45.242	134.758			113.53
		8	121.293	58.707		78.092	101.908		44.666	135.334		136.61	43.39		37.97	142.03		81.719	98.281		82.569	97.431		89.615	90.385		84.278	95.722		47.337	132.663		79.765	100.235		117.512	62.488		32.471	147.529		53.446	126.554		59.59	120.41			103.538
		9	115.145	64.855		106.783	73.217		59.036	120.964		129.841	50.159		60.117	119.883		108.435	71.565		102.918	77.082		95.906	84.094		96.009	83.991		42.274	137.726		95.254	84.746		147.907	32.093		37.655	142.345		40.455	139.545		80.026	99.974			92.1493
		10	136.717	43.283		103.879	76.121		85.034	94.966		126.027	53.973		118.301	61.699		113.974	66.026		118.61	61.39		105.068	74.932		109.111	70.889		37.628	142.372		105.255	74.745		175.601	4.399		46.42	133.58		72.181	107.819		93.17	86.83			76.8683
		11	154.636	25.364		115.688	64.312		128.418	51.582		155.72	24.28		148.564	31.436		138.562	41.438		129.102	50.898		122.276	57.724		121.9	58.1		50.194	129.806		141.843	38.157		179.076	0.924		60.499	119.501		141.546	38.454		116.387	63.613			53.0393
		12	146.861	33.139		120.79	59.21		130.732	49.268		179.566	0.434		158.385	21.615		148.53	31.47		128.254	51.746		124.695	55.305		126.18	53.82		69.669	110.331		149.534	30.466		179.076	0.924		84.245	95.755		128.66	51.34		138.862	41.138			45.7307
		13	159.07	20.93		135	45		151.972	28.028		158.736	21.264		162.842	17.158		161.771	18.229		136.364	43.636		132.016	47.984		133.122	46.878		86.219	93.781		146.31	33.69		170.149	9.851		95.819	84.181		137.121	42.879		144.252	35.748			39.2825
		14	147.995	32.005		156.869	23.131		171.808	8.192		162.286	17.714		173.723	6.277		161.771	18.229		149.574	30.426		133.227	46.773		133.122	46.878		100.154	79.846		144.951	35.049		170.149	9.851		116.197	63.803		160.017	19.983		154.704	25.296			30.8969
		15	154.778	25.222		179.384	0.616		164.974	15.026		146.845	33.155		178.091	1.909		174.806	5.194		147.529	32.471		139.086	40.914		140.78	39.22		113.629	66.371		150.792	29.208		168.923	11.077		132.274	47.726		178.152	1.848		157.194	22.806			24.8509
		16	159.792	20.208		177.274	2.726		176.186	3.814		138.434	41.566		172.318	7.682		174.806	5.194		150.06	29.94		146.472	33.528		140.78	39.22		126.158	53.842		150.792	29.208		168.923	11.077		148.079	31.921		178.506	1.494		157.194	22.806			22.2817
		17	165.801	14.199		179.145	0.855		170.121	9.879		154.966	25.034		176.06	3.94		174.806	5.194		165.145	14.855		146.472	33.528		143.909	36.091		122.58	57.42		169.765	10.235		179.055	0.945		150.945	29.055		178.506	1.494		165.52	14.48			17.1469
		18	164.49	15.51		177.879	2.121		171.369	8.631		170.838	9.162		176.06	3.94		179.476	0.524		170.049	9.951		152.316	27.684		159.001	20.999		122.58	57.42		169.765	10.235		179.055	0.945		162.181	17.819		177.79	2.21		168.219	11.781			13.2621
		19	167.079	12.921		176.84	3.16		171.967	8.033		170.838	9.162		178.971	1.029		179.476	0.524		151.803	28.197		152.316	27.684		168.317	11.683		135	45		152.919	27.081		179.055	0.945		164.972	15.028		176.82	3.18		168.219	11.781			13.6939
		20	162.927	17.073		178.264	1.736		173.089	6.911		170.838	9.162		179.578	0.422		179.476	0.524		160.986	19.014		168.435	11.565		174.908	5.092		143.207	36.793		152.919	27.081		178.54	1.46		164.972	15.028		176.82	3.18		178.004	1.996			10.4691
		21	165.4	14.6		178.264	1.736		173.089	6.911		173.648	6.352		179.578	0.422		179.74	0.26		160.986	19.014		164.174	15.826		174.908	5.092		143.207	36.793		157.166	22.834		178.54	1.46		169.9	10.1		176.82	3.18		178.004	1.996			9.77173
		22	169.261	10.739		179.384	0.616		169.058	10.942		173.648	6.352		178.497	1.503		179.74	0.26		168.642	11.358		169.559	10.441		169.992	10.008		145.798	34.202		160.821	19.179		177.78	2.22		169.9	10.1		176.82	3.18		178.004	1.996			8.87307
		23	167.079	12.921		176.186	3.814		168.787	11.213		168.617	11.383		178.497	1.503		179.74	0.26		168.642	11.358		169.559	10.441		169.992	10.008		145.798	34.202		160.821	19.179		177.78	2.22		169.9	10.1		176.149	3.851		178.004	1.996			9.62993
		24	166.535	13.465		172.634	7.366		170.966	9.034		179.043	0.957		176.78	3.22		179.74	0.26		168.642	11.358		169.559	10.441		171.415	8.585		145.798	34.202		170.362	9.638		177.78	2.22		171.925	8.075		178.702	1.298		174.483	5.517			8.37573
		25	162.708	17.292		177.892	2.108		170.966	9.034		179.043	0.957		176.78	3.22		179.74	0.26		163.142	16.858		169.559	10.441		171.415	8.585		144.09	35.91		170.362	9.638		177.78	2.22		171.925	8.075		178.702	1.298		176.379	3.621			8.63447
		26	170.471	9.529		177.892	2.108		170.966	9.034		179.043	0.957		176.78	3.22		179.74	0.26		163.142	16.858		169.559	10.441		171.415	8.585		157.056	22.944		170.362	9.638		177.78	2.22		173.306	6.694		178.702	1.298		176.379	3.621			7.16047
		27	170.471	9.529		180	0		175.199	4.801		179.043	0.957		176.78	3.22		179.74	0.26		175.815	4.185		173.66	6.34		175.348	4.652		157.056	22.944		171.048	8.952		177.78	2.22		179.903	0.097		178.702	1.298		176.379	3.621			4.87173
		28	170.471	9.529		180	0		175.199	4.801		179.043	0.957		176.78	3.22		179.74	0.26		175.815	4.185		173.66	6.34		175.348	4.652		163.314	16.686		171.048	8.952		178.678	1.322		179.51	0.49		178.702	1.298		176.379	3.621			4.42087
		29	170.471	9.529		180	0		175.199	4.801		178.483	1.517		176.78	3.22		179.74	0.26		175.815	4.185		173.66	6.34		175.348	4.652		163.314	16.686		171.048	8.952		178.678	1.322		179.51	0.49		178.702	1.298		176.379	3.621			4.4582
		30	170.471	9.529		178.781	1.219		175.199	4.801		178.483	1.517		176.78	3.22		179.74	0.26		175.815	4.185		173.66	6.34		175.348	4.652		163.314	16.686		165.964	14.036		178.678	1.322		179.51	0.49		178.702	1.298		179.899	0.101			4.64373
20190614
		line	ful2
		treatment
			1	1comp		2	2comp		3	3comp		4	4comp		5	5comp		6	6comp		7	7comp		8	8comp		9	9comp		10	10comp		11	11comp		12	12comp		13	13comp		14	14comp		15	15comp			average
		1	0.486	179.514		7.449	172.551		5.226	174.774		4.894	175.106		5.589	174.411		0.831	179.169		2.389	177.611		5.554	174.446		5.345	174.655		15.832	164.168		6.67	173.33		5.626	174.374		14.544	165.456		4.538	175.462		6.682	173.318			173.89
		2	9.162	170.838		7.532	172.468		20.521	159.479		30.273	149.727		50.194	129.806		12.169	167.831		30.75	149.25		5.554	174.446		15.945	164.055		43.403	136.597		31.234	148.766		6.463	173.537		38.718	141.282		43.577	136.423		28.926	151.074			155.039
		3	26.973	153.027		19.58	160.42		20.521	159.479		59.866	120.134		63.164	116.836		29.811	150.189		36.87	143.13		31.554	148.446		37.659	142.341		95.763	84.237		31.234	148.766		22.213	157.787		66.615	113.385		46.583	133.417		28.926	151.074			138.845
		4	72.019	107.981		26.335	153.665		19.607	160.393		79.055	100.945		96.633	83.367		33.591	146.409		36.87	143.13		64.218	115.782		33.463	146.537		89.883	90.117		60.465	119.535		36.258	143.742		110.48	69.52		51.313	128.687		35.925	144.075			123.592
		5	77.256	102.744		26.335	153.665		29.529	150.471		108.8	71.2		98.918	81.082		26.565	153.435		36.87	143.13		95.209	84.791		58.542	121.458		107.744	72.256		108.679	71.321		38.037	141.963		128.143	51.857		71.625	108.375		35.925	144.075			110.122
		6	95.711	84.289		65.344	114.656		67.671	112.329		117.243	62.757		98.918	81.082		26.565	153.435		51.885	128.115		120.443	59.557		82.427	97.573		120.761	59.239		98.45	81.55		38.037	141.963		160.162	19.838		106.074	73.926		56.557	123.443			92.9168
		7	120.727	59.273		85.974	94.026		105.72	74.28		139.443	40.557		126.908	53.092		40.601	139.399		68.326	111.674		129.217	50.783		78.385	101.615		124.772	55.228		118.926	61.074		45.451	134.549		161.761	18.239		112.175	67.825		71.414	108.586			78.0133
		8	133.035	46.965		110.709	69.291		138.668	41.332		148.847	31.153		125.198	54.802		40.601	139.399		87.304	92.696		145.75	34.25		93.272	86.728		140.367	39.633		137.726	42.274		77.334	102.666		161.761	18.239		130.389	49.611		96.113	83.887			62.1951
		9	147.415	32.585		121.525	58.475		143.486	36.514		165.557	14.443		125.198	54.802		71.016	108.984		92.895	87.105		157.085	22.915		88.815	91.185		143.139	36.861		109.256	70.744		140.055	39.945		151.504	28.496		150.633	29.367		148.066	31.934			49.6237
		10	147.415	32.585		121.525	58.475		165.727	14.273		165.557	14.443		128.306	51.694		111.094	68.906		111.303	68.697		167.95	12.05		109.654	70.346		156.408	23.592		124.38	55.62		148.55	31.45		150.997	29.003		150.611	29.389		160.435	19.565			38.6725
		11	165.428	14.572		133.764	46.236		165.727	14.273		165.557	14.443		141.05	38.95		124.832	55.168		115.404	64.596		166.132	13.868		122.326	57.674		162.756	17.244		133.871	46.129		151.533	28.467		156.185	23.815		150.611	29.389		160.435	19.565			32.2926
		12	165.428	14.572		133.764	46.236		170.473	9.527		165.557	14.443		147.113	32.887		130.184	49.816		121.608	58.392		170.86	9.14		133.866	46.134		170.255	9.745		144.849	35.151		171.104	8.896		162.693	17.307		160.758	19.242		160.435	19.565			26.0702
		13	165.428	14.572		144.933	35.067		170.473	9.527		165.557	14.443		151.412	28.588		168.393	11.607		121.608	58.392		170.86	9.14		140.667	39.333		177.246	2.754		151.509	28.491		171.104	8.896		162.693	17.307		160.758	19.242		160.435	19.565			21.1283
		14	165.428	14.572		154.003	25.997		170.473	9.527		174.277	5.723		154.224	25.776		168.393	11.607		121.608	58.392		175.94	4.06		140.667	39.333		174.223	5.777		158.827	21.173		171.104	8.896		162.693	17.307		172.24	7.76		160.435	19.565			18.3643
		15	177.372	2.628		154.003	25.997		170.473	9.527		174.277	5.723		154.224	25.776		168.393	11.607		127.811	52.189		176.487	3.513		140.667	39.333		174.223	5.777		152.571	27.429		179.108	0.892		162.693	17.307		171.579	8.421		160.435	19.565			17.0456
		16	177.372	2.628		157.979	22.021		170.473	9.527		174.277	5.723		154.224	25.776		175.984	4.016		127.811	52.189		176.487	3.513		148.266	31.734		174.223	5.777		152.571	27.429		179.108	0.892		170.232	9.768		179.395	0.605		170.614	9.386			14.0656
		17	177.372	2.628		160.769	19.231		170.473	9.527		174.277	5.723		154.224	25.776		175.984	4.016		127.811	52.189		176.487	3.513		148.266	31.734		174.223	5.777		152.571	27.429		178.315	1.685		170.232	9.768		179.395	0.605		170.614	9.386			13.9325
		18	179.876	0.124		160.769	19.231		170.473	9.527		174.277	5.723		157.759	22.241		175.984	4.016		136.378	43.622		176.487	3.513		152.272	27.728		174.223	5.777		157.465	22.535		178.315	1.685		170.232	9.768		179.395	0.605		170.614	9.386			12.3654
		19	179.876	0.124		161.084	18.916		170.473	9.527		174.277	5.723		157.759	22.241		175.984	4.016		147.309	32.691		176.487	3.513		161.565	18.435		178.204	1.796		157.465	22.535		178.315	1.685		170.232	9.768		179.395	0.605		170.614	9.386			10.7307
		20	179.876	0.124		165.422	14.578		170.473	9.527		174.277	5.723		157.759	22.241		171.928	8.072		156.625	23.375		176.487	3.513		168.275	11.725		178.204	1.796		157.465	22.535		178.315	1.685		172.902	7.098		171.084	8.916		170.614	9.386			10.0196
		21	179.876	0.124		168.779	11.221		170.473	9.527		174.277	5.723		157.759	22.241		171.928	8.072		165.725	14.275		176.487	3.513		168.275	11.725		178.204	1.796		157.465	22.535		178.315	1.685		172.902	7.098		171.084	8.916		170.614	9.386			9.18913
		22	179.876	0.124		168.779	11.221		170.473	9.527		174.277	5.723		157.759	22.241		175.781	4.219		165.046	14.954		178.307	1.693		168.275	11.725		172.411	7.589		157.465	22.535		178.315	1.685		172.902	7.098		175.21	4.79		170.614	9.386			8.96733
		23	179.876	0.124		168.779	11.221		170.473	9.527		174.277	5.723		157.759	22.241		175.781	4.219		165.046	14.954		178.307	1.693		174.094	5.906		172.411	7.589		157.465	22.535		178.315	1.685		172.902	7.098		175.21	4.79		170.614	9.386			8.5794
		24	179.876	0.124		168.779	11.221		170.473	9.527		174.277	5.723		157.759	22.241		175.781	4.219		174.369	5.631		178.307	1.693		174.094	5.906		172.411	7.589		167.103	12.897		178.315	1.685		172.902	7.098		175.21	4.79		170.614	9.386			7.31533
		25	179.876	0.124		171.393	8.607		170.473	9.527		174.277	5.723		157.759	22.241		175.781	4.219		174.369	5.631		178.307	1.693		171.916	8.084		172.411	7.589		167.103	12.897		178.315	1.685		171.55	8.45		175.21	4.79		170.614	9.386			7.3764
		26	179.876	0.124		171.393	8.607		170.473	9.527		174.277	5.723		157.759	22.241		175.781	4.219		174.369	5.631		178.307	1.693		171.916	8.084		172.411	7.589		179.117	0.883		178.315	1.685		171.55	8.45		175.21	4.79		170.614	9.386			6.57547
		27	179.876	0.124		171.393	8.607		170.473	9.527		174.277	5.723		155.74	24.26		175.781	4.219		174.369	5.631		178.307	1.693		171.916	8.084		174.539	5.461		179.117	0.883		178.315	1.685		171.55	8.45		175.21	4.79		170.614	9.386			6.5682
		28	179.876	0.124		171.393	8.607		170.473	9.527		174.277	5.723		155.74	24.26		175.781	4.219		174.369	5.631		178.307	1.693		171.916	8.084		174.539	5.461		179.117	0.883		178.315	1.685		171.55	8.45		175.21	4.79		170.614	9.386			6.5682
		29	179.691	0.309		177.397	2.603		170.473	9.527		173.884	6.116		154.188	25.812		175.781	4.219		171.554	8.446		178.307	1.693		171.916	8.084		174.539	5.461		179.117	0.883		178.315	1.685		171.55	8.45		175.21	4.79		170.614	9.386			6.4976
		30	179.691	0.309		177.397	2.603		170.473	9.527		173.884	6.116		154.188	25.812		174.174	5.826		171.554	8.446		178.307	1.693		171.916	8.084		179.896	0.104		179.117	0.883		178.315	1.685		171.55	8.45		175.21	4.79		170.614	9.386			6.2476
		line	WT
		treatment
			1	1comp		2	2comp		3	3comp		4	4comp		5	5comp		6	6comp		7	7comp		8	8comp		9	9comp		10	10comp		11	11comp		12	12comp		13	13comp		14	14comp		15	15comp			average
		1	3.177	176.823		9.276	170.724		4.28	175.72		5.731	174.269		7.103	172.897		4.603	175.397		4.376	175.624		3.909	176.091		3.73	176.27		1.758	178.242		5.49	174.51		1.34	178.66		3.441	176.559		2.155	177.845		2.408	177.592			175.815
		2	8.963	171.037		9.276	170.724		51.491	128.509		8.818	171.182		50.366	129.634		12.299	167.701		21.038	158.962		12.609	167.391		3.73	176.27		1.758	178.242		7.853	172.147		21.387	158.613		3.441	176.559		21.161	158.839		31.491	148.509			162.288
		3	27.438	152.562		32.551	147.449		54.903	125.097		51.42	128.58		57.457	122.543		24.075	155.925		44.749	135.251		47.444	132.556		17.068	162.932		14.193	165.807		30.417	149.583		57.453	122.547		22.205	157.795		41.405	138.595		45.183	134.817			142.136
		4	38.597	141.403		59.888	120.112		54.903	125.097		71.083	108.917		43.877	136.123		44.7	135.3		35.915	144.085		85.448	94.552		24.014	155.986		35.914	144.086		30.417	149.583		57.453	122.547		79.909	100.091		41.405	138.595		62.365	117.635			128.941
		5	38.597	141.403		81.615	98.385		38.454	141.546		93.843	86.157		38.678	141.322		24.022	155.978		25.373	154.627		123.254	56.746		24.014	155.986		24.86	155.14		31.26	148.74		52.407	127.593		97.125	82.875		38.501	141.499		62.365	117.635			127.042
		6	33.993	146.007		81.615	98.385		38.454	141.546		101.138	78.862		31.222	148.778		24.022	155.978		39.497	140.503		119.363	60.637		29.283	150.717		29.256	150.744		64.078	115.922		37.875	142.125		97.125	82.875		38.501	141.499		80.183	99.817			123.626
		7	50.745	129.255		103.721	76.279		31.618	148.382		162.305	17.695		33.89	146.11		27.3	152.7		70.342	109.658		101.31	78.69		28.774	151.226		29.256	150.744		91.579	88.421		32.717	147.283		101.641	78.359		33.927	146.073		85.928	94.072			114.33
		8	77.324	102.676		116.988	63.012		49.505	130.495		137.938	42.062		36.254	143.746		27.3	152.7		95.904	84.096		100.773	79.227		28.774	151.226		21.425	158.575		114.563	65.437		33.789	146.211		112.327	67.673		47.674	132.326		88.145	91.855			107.421
		9	121.959	58.041		135.118	44.882		57.095	122.905		144.438	35.562		34.267	145.733		35.72	144.28		125.952	54.048		108.846	71.154		50.11	129.89		54.813	125.187		133.55	46.45		85.396	94.604		130.88	49.12		54.679	125.321		86.82	93.18			89.3571
		10	168.394	11.606		141.67	38.33		72.525	107.475		150.368	29.632		61.448	118.552		52.841	127.159		145.656	34.344		114.601	65.399		58.031	121.969		66.815	113.185		153.027	26.973		92.43	87.57		130.88	49.12		73.626	106.374		87.397	92.603			75.3527
		11	174.576	5.424		148.81	31.19		93.136	86.864		158.499	21.501		84.948	95.052		86.06	93.94		154.249	25.751		127.1	52.9		75.651	104.349		77.393	102.607		153.027	26.973		95.615	84.385		130.88	49.12		96.727	83.273		90	90			63.5553
		12	175.681	4.319		148.81	31.19		121.065	58.935		168.99	11.01		134.66	45.34		108.325	71.675		178.257	1.743		125.568	54.432		89.466	90.534		86.568	93.432		175.691	4.309		108.655	71.345		151.798	28.202		106.091	73.909		90	90			48.6917
		13	175.681	4.319		169.287	10.713		127.611	52.389		168.99	11.01		145.448	34.552		134.558	45.442		178.257	1.743		139.504	40.496		100.668	79.332		104.449	75.551		177.515	2.485		108.905	71.095		151.798	28.202		118.96	61.04		90	90			40.5579
		14	171.601	8.399		169.287	10.713		141.477	38.523		153.88	26.12		146.472	33.528		146.896	33.104		174.601	5.399		146.663	33.337		100.668	79.332		99.651	80.349		177.515	2.485		115.56	64.44		157.705	22.295		129.5	50.5		93.514	86.486			38.334
		15	171.601	8.399		169.287	10.713		145.982	34.018		157.663	22.337		162.623	17.377		149.813	30.187		173.376	6.624		153.869	26.131		119.808	60.192		112.38	67.62		177.515	2.485		133.698	46.302		157.705	22.295		142.028	37.972		96.766	83.234			31.7257
		16	179.366	0.634		169.287	10.713		153.782	26.218		157.908	22.092		168.482	11.518		175.091	4.909		173.376	6.624		165.964	14.036		119.808	60.192		116.901	63.099		177.515	2.485		144.328	35.672		169.319	10.681		137.879	42.121		102.031	77.969			25.9309
		17	179.366	0.634		169.287	10.713		161.396	18.604		157.908	22.092		177.914	2.086		175.091	4.909		173.376	6.624		170.134	9.866		127.273	52.727		131.055	48.945		174.043	5.957		137.087	42.913		169.319	10.681		140.884	39.116		118.526	61.474			22.4894
		18	179.366	0.634		169.287	10.713		164.694	15.306		165.748	14.252		179.484	0.516		175.091	4.909		174.43	5.57		175.426	4.574		133.668	46.332		131.055	48.945		174.043	5.957		149.697	30.303		169.319	10.681		143.749	36.251		154.176	25.824			17.3845
		19	179.366	0.634		169.287	10.713		167.269	12.731		165.748	14.252		179.484	0.516		177.036	2.964		174.43	5.57		175.426	4.574		133.668	46.332		137.337	42.663		179.335	0.665		142.8	37.2		169.319	10.681		151.476	28.524		162.102	17.898			15.7278
		20	177.167	2.833		169.287	10.713		174.34	5.66		172.21	7.79		170.524	9.476		177.036	2.964		174.43	5.57		176.878	3.122		139.439	40.561		137.337	42.663		179.335	0.665		142.8	37.2		169.319	10.681		155.925	24.075		161.353	18.647			14.8413
		21	177.167	2.833		169.287	10.713		174.34	5.66		172.21	7.79		179.053	0.947		177.036	2.964		174.43	5.57		176.878	3.122		139.439	40.561		133.059	46.941		176.664	3.336		142.8	37.2		169.319	10.681		152.833	27.167		172.261	7.739			14.2149
		22	178.825	1.175		169.287	10.713		174.34	5.66		177.363	2.637		174.855	5.145		177.036	2.964		174.43	5.57		176.878	3.122		165.085	14.915		133.059	46.941		170.94	9.06		148.671	31.329		178.752	1.248		160.495	19.505		172.261	7.739			11.1815
		23	178.825	1.175		174.289	5.711		178.648	1.352		177.363	2.637		174.855	5.145		177.036	2.964		174.43	5.57		176.878	3.122		165.085	14.915		133.059	46.941		170.94	9.06		148.671	31.329		178.752	1.248		166.504	13.496		176.221	3.779			9.89627
		24	178.825	1.175		174.289	5.711		178.648	1.352		172.411	7.589		179.251	0.749		177.036	2.964		174.43	5.57		176.878	3.122		168.119	11.881		133.059	46.941		170.94	9.06		143.963	36.037		178.752	1.248		166.504	13.496		176.221	3.779			10.0449
		25	178.825	1.175		174.289	5.711		178.648	1.352		172.411	7.589		179.251	0.749		177.036	2.964		174.43	5.57		176.878	3.122		171.92	8.08		133.059	46.941		170.94	9.06		143.963	36.037		178.752	1.248		172.99	7.01		176.221	3.779			9.35913
		26	178.825	1.175		174.289	5.711		178.648	1.352		172.411	7.589		175.426	4.574		177.036	2.964		179.702	0.298		176.878	3.122		171.92	8.08		133.059	46.941		170.94	9.06		143.963	36.037		178.752	1.248		172.99	7.01		176.221	3.779			9.26267
		27	178.825	1.175		174.289	5.711		178.648	1.352		172.411	7.589		173.907	6.093		177.036	2.964		179.702	0.298		176.878	3.122		171.92	8.08		133.059	46.941		170.94	9.06		143.963	36.037		178.752	1.248		172.99	7.01		176.221	3.779			9.36393
		28	178.825	1.175		174.289	5.711		178.648	1.352		172.411	7.589		173.907	6.093		177.036	2.964		179.702	0.298		175.527	4.473		171.92	8.08		133.059	46.941		170.94	9.06		143.963	36.037		178.752	1.248		172.235	7.765		176.221	3.779			9.50433
		29	179.828	0.172		174.289	5.711		178.648	1.352		172.411	7.589		173.907	6.093		177.036	2.964		179.702	0.298		175.527	4.473		171.92	8.08		133.059	46.941		170.94	9.06		143.963	36.037		178.752	1.248		172.235	7.765		176.221	3.779			9.43747
		30	179.828	0.172		167.574	12.426		178.648	1.352		172.411	7.589		173.907	6.093		177.036	2.964		178.931	1.069		177.896	2.104		177.325	2.675		142.824	37.176		170.94	9.06		143.963	36.037		179.76	0.24		172.235	7.765		176.221	3.779			8.70007
20190618
		line	ful 2
		treatment
			1	1comp		2	2comp		3	3comp		4	4comp		5	5comp		6	6comp		7	7comp		8	8comp		9	9comp		10	10comp		11	11comp		12	12comp		13	13comp		14	14comp		15	15comp			average
		1	6.085	173.915		3.757	176.243		15.646	164.354		3.945	176.055		11.437	168.563		12.836	167.164		4.834	175.166		4.666	175.334		8.68	171.32		7.075	172.925		5.969	174.031		7.324	172.676		9.647	170.353		4.827	175.173		4.955	175.045			172.554
		2	15.48	164.52		3.757	176.243		22.732	157.268		3.945	176.055		13.236	166.764		22.724	157.276		23.212	156.788		14.099	165.901		8.68	171.32		14.518	165.482		9.847	170.153		19.311	160.689		26.879	153.121		13.387	166.613		18.787	161.213			164.627
		3	15.018	164.982		13.591	166.409		32.681	147.319		18.82	161.18		29.982	150.018		57.866	122.134		45	135		32.969	147.031		11.872	168.128		58.849	121.151		36.957	143.043		58.496	121.504		64.175	115.825		42.879	137.121		51.978	128.022			141.924
		4	57.78	122.22		31.61	148.39		106.801	73.199		34.352	145.648		29.982	150.018		80.711	99.289		75.61	104.39		68.839	111.161		20.225	159.775		131.038	48.962		83.903	96.097		126.973	53.027		91.085	88.915		79.452	100.548		120.933	59.067			104.047
		5	94.56	85.44		32.134	147.866		105.144	74.856		34.352	145.648		29.982	150.018		93.674	86.326		105.209	74.791		112.546	67.454		26.081	153.919		137.656	42.344		102.265	77.735		163.632	16.368		145.408	34.592		84.582	95.418		147.603	32.397			85.6781
		6	146.418	33.582		33.395	146.605		114.221	65.779		28.942	151.058		20.828	159.172		94.191	85.809		102.349	77.651		112.546	67.454		41.046	138.954		116.565	63.435		113.136	66.864		171.315	8.685		145.408	34.592		109.433	70.567		173.784	6.216			78.4282
		7	151.46	28.54		33.395	146.605		117.766	62.234		33.707	146.293		31.036	148.964		136.637	43.363		111.371	68.629		121.899	58.101		32.194	147.806		108.647	71.353		113.136	66.864		176.634	3.366		145.408	34.592		92.936	87.064		173.784	6.216			74.666
		8	160.304	19.696		38.027	141.973		112.283	67.717		51.193	128.807		71.152	108.848		130.152	49.848		120.387	59.613		143.866	36.134		32.194	147.806		127.255	52.745		141.938	38.062		176.634	3.366		179.134	0.866		127.56	52.44		173.357	6.643			60.9709
		9	142.865	37.135		105.255	74.745		123.528	56.472		69.436	110.564		107.902	72.098		143.174	36.826		129.839	50.161		153.401	26.599		61.864	118.136		130.396	49.604		141.938	38.062		176.241	3.759		179.134	0.866		150.803	29.197		143.797	36.203			49.3618
		10	158.199	21.801		100.766	79.234		144.596	35.404		88.73	91.27		138.735	41.265		176.634	3.366		146.813	33.187		175.236	4.764		76.879	103.121		147.205	32.795		143.13	36.87		176.241	3.759		167.881	12.119		143.746	36.254		143.533	36.467			38.1117
		11	158.199	21.801		115.821	64.179		155.868	24.132		110.712	69.288		164.783	15.217		176.934	3.066		146.813	33.187		175.374	4.626		82.013	97.987		145.381	34.619		143.13	36.87		176.241	3.759		167.881	12.119		143.746	36.254		143.533	36.467			32.9047
		12	158.199	21.801		115.821	64.179		155.868	24.132		110.712	69.288		176.186	3.814		176.934	3.066		146.813	33.187		180	0		99.156	80.844		131.634	48.366		143.13	36.87		173.196	6.804		167.881	12.119		154.051	25.949		143.533	36.467			31.1257
		13	168.103	11.897		147.529	32.471		174.575	5.425		131.456	48.544		178.145	1.855		176.934	3.066		140.692	39.308		180	0		100.353	79.647		131.634	48.366		151.307	28.693		173.196	6.804		174.452	5.548		154.051	25.949		150.31	29.69			24.4842
		14	168.103	11.897		147.529	32.471		174.575	5.425		139.272	40.728		177.026	2.974		176.934	3.066		140.692	39.308		175.11	4.89		109.403	70.597		138.18	41.82		151.307	28.693		166.278	13.722		174.452	5.548		165.431	14.569		150.31	29.69			23.0265
		15	168.103	11.897		172.427	7.573		174.575	5.425		150.945	29.055		173.317	6.683		176.934	3.066		147.212	32.788		175.11	4.89		123.833	56.167		143.13	36.87		151.307	28.693		164.184	15.816		174.452	5.548		165.431	14.569		150.31	29.69			19.2487
		16	168.103	11.897		165.925	14.075		165.51	14.49		160.652	19.348		173.317	6.683		176.934	3.066		146.675	33.325		172.912	7.088		133.729	46.271		147.529	32.471		151.307	28.693		164.184	15.816		174.452	5.548		165.431	14.569		167.864	12.136			17.6984
		17	168.103	11.897		165.925	14.075		171.769	8.231		172.667	7.333		176.996	3.004		176.934	3.066		146.675	33.325		178.315	1.685		140.44	39.56		154.295	25.705		151.307	28.693		166.562	13.438		174.452	5.548		165.877	14.123		167.864	12.136			14.7879
		18	167.211	12.789		177.906	2.094		171.769	8.231		172.667	7.333		176.996	3.004		176.634	3.366		161.842	18.158		178.315	1.685		140.44	39.56		154.295	25.705		151.307	28.693		166.562	13.438		169.049	10.951		165.877	14.123		167.864	12.136			13.4177
		19	167.211	12.789		177.906	2.094		171.769	8.231		172.667	7.333		176.996	3.004		176.634	3.366		161.842	18.158		178.315	1.685		140.44	39.56		149.036	30.964		151.307	28.693		175.815	4.185		169.049	10.951		167.121	12.879		167.864	12.136			13.0685
		20	170.829	9.171		177.906	2.094		171.769	8.231		172.747	7.253		178.641	1.359		176.634	3.366		161.842	18.158		178.315	1.685		140.44	39.56		149.036	30.964		156.501	23.499		172.659	7.341		172.151	7.849		167.121	12.879		167.864	12.136			12.3697
		21	170.829	9.171		177.906	2.094		177.066	2.934		172.747	7.253		178.641	1.359		176.634	3.366		161.842	18.158		176.201	3.799		149.036	30.964		149.585	30.415		156.501	23.499		172.659	7.341		172.151	7.849		167.121	12.879		167.864	12.136			11.5478
		22	170.829	9.171		176.021	3.979		177.066	2.934		172.747	7.253		178.641	1.359		176.634	3.366		161.842	18.158		176.201	3.799		148.643	31.357		149.585	30.415		161.696	18.304		172.659	7.341		172.151	7.849		170.856	9.144		165.849	14.151			11.2387
		23	170.829	9.171		176.021	3.979		177.066	2.934		172.747	7.253		176.065	3.935		176.634	3.366		161.842	18.158		176.201	3.799		148.643	31.357		149.585	30.415		147.836	32.164		172.659	7.341		168.917	11.083		170.856	9.144		165.849	14.151			12.55
		24	170.829	9.171		176.021	3.979		177.089	2.911		172.747	7.253		176.065	3.935		177.127	2.873		168.361	11.639		176.201	3.799		157.402	22.598		149.585	30.415		147.836	32.164		172.659	7.341		172.325	7.675		170.856	9.144		165.849	14.151			11.2699
		25	163.179	16.821		176.021	3.979		177.089	2.911		172.747	7.253		176.065	3.935		177.127	2.873		168.361	11.639		173.221	6.779		151.941	28.059		155.537	24.463		147.836	32.164		172.659	7.341		172.325	7.675		170.856	9.144		169.61	10.39			11.6951
		26	163.179	16.821		176.021	3.979		168.596	11.404		173.983	6.017		176.065	3.935		177.127	2.873		168.361	11.639		173.221	6.779		151.941	28.059		155.537	24.463		147.836	32.164		172.659	7.341		162.77	17.23		170.856	9.144		169.61	10.39			12.8159
		27	169.591	10.409		179.277	0.723		168.596	11.404		173.983	6.017		176.065	3.935		177.127	2.873		166.664	13.336		177.932	2.068		155.853	24.147		148.549	31.451		149.341	30.659		177.274	2.726		164.745	15.255		170.856	9.144		169.61	10.39			11.6358
		28	167.829	12.171		179.277	0.723		179.658	0.342		173.983	6.017		176.065	3.935		177.976	2.024		162.081	17.919		177.932	2.068		155.853	24.147		161.264	18.736		149.341	30.659		177.274	2.726		166.592	13.408		170.856	9.144		169.61	10.39			10.2939
		29	167.829	12.171		179.277	0.723		179.658	0.342		173.983	6.017		176.065	3.935		177.976	2.024		172.412	7.588		177.932	2.068		151.667	28.333		161.264	18.736		149.341	30.659		177.274	2.726		168.954	11.046		172.082	7.918		169.61	10.39			9.64507
		30	167.829	12.171		179.277	0.723		176.521	3.479		175.307	4.693		176.474	3.526		177.976	2.024		174.486	5.514		177.932	2.068		156.159	23.841		161.264	18.736		149.341	30.659		177.274	2.726		168.954	11.046		172.082	7.918		169.61	10.39			9.30093
		line	WT
		treatment
			1	1comp		2	2comp		3	3comp		4	4comp		5	5comp		6	6comp		7	7comp		8	8comp		9	9comp		10	10comp		11	11comp		12	12comp		13	13comp		14	14comp		15	15comp			average
		1	3.922	176.078		1.998	178.002		4.435	175.565		3.364	176.636		4.185	175.815		5.615	174.385		2.067	177.933		3.231	176.769		1.546	178.454		9.08	170.92		7.253	172.747		14.876	165.124		7.753	172.247		5.795	174.205		2.332	177.668			174.837
		2	3.922	176.078		1.998	178.002		4.435	175.565		7.672	172.328		8.914	171.086		10.57	169.43		11.605	168.395		9.334	170.666		14.755	165.245		32.414	147.586		7.253	172.747		17.134	162.866		16.95	163.05		5.795	174.205		20.323	159.677			168.462
		3	10.176	169.824		9.203	170.797		50.622	129.378		79.296	100.704		25.435	154.565		40.688	139.312		18.037	161.963		10.036	169.964		53.409	126.591		49.559	130.441		30.873	149.127		46.515	133.485		59.821	120.179		19.329	160.671		50.641	129.359			143.091
		4	19.654	160.346		78.27	101.73		77.114	102.886		95.609	84.391		38.789	141.211		101.441	78.559		70.983	109.017		32.035	147.965		76.535	103.465		60.831	119.169		27.619	152.381		32.65	147.35		65.038	114.962		94.286	85.714		59.813	120.187			117.956
		5	19.654	160.346		80.775	99.225		77.114	102.886		102.319	77.681		38.789	141.211		95.812	84.188		104.669	75.331		32.035	147.965		95.344	84.656		48.208	131.792		44.086	135.914		109.822	70.178		65.038	114.962		83.347	96.653		51.583	128.417			110.094
		6	24.481	155.519		90.251	89.749		77.114	102.886		102.52	77.48		24.87	155.13		95.812	84.188		146.116	33.884		31.026	148.974		88.537	91.463		48.208	131.792		60.65	119.35		109.822	70.178		65.038	114.962		83.347	96.653		60.179	119.821			106.135
		7	29.745	150.255		132.483	47.517		96.376	83.624		108.741	71.259		31.87	148.13		68.039	111.961		173.639	6.361		31.026	148.974		88.537	91.463		29.023	150.977		64.615	115.385		79.622	100.378		75.777	104.223		90.103	89.897		53.747	126.253			103.11
		8	39.695	140.305		169.592	10.408		96.376	83.624		121.94	58.06		31.009	148.991		71.395	108.605		174.806	5.194		51.953	128.047		88.537	91.463		29.023	150.977		74.743	105.257		79.622	100.378		91.878	88.122		99.135	80.865		65.482	114.518			94.3209
		9	35.662	144.338		173.271	6.729		96.376	83.624		130.428	49.572		33.69	146.31		71.395	108.605		174.806	5.194		86.461	93.539		89.911	90.089		32.648	147.352		79.903	100.097		96.746	83.254		131.414	48.586		110.815	69.185		80.838	99.162			85.0424
		10	35.662	144.338		179.913	0.087		91.704	88.296		130.428	49.572		64.654	115.346		74.761	105.239		172.926	7.074		130.972	49.028		108.591	71.409		32.648	147.352		79.903	100.097		110.271	69.729		139.082	40.918		126.059	53.941		122.32	57.68			73.3404
		11	37.491	142.509		179.913	0.087		91.704	88.296		146.952	33.048		88.497	91.503		74.761	105.239		172.926	7.074		107.828	72.172		124.879	55.121		46.83	133.17		82.155	97.845		118.415	61.585		155.323	24.677		148.881	31.119		144.179	35.821			65.2844
		12	37.491	142.509		176.113	3.887		91.704	88.296		172.971	7.029		113.406	66.594		82.235	97.765		179.319	0.681		107.828	72.172		147.23	32.77		62.265	117.735		82.155	97.845		154.121	25.879		163.794	16.206		163.084	16.916		161.281	18.719			53.6669
		13	34.416	145.584		176.113	3.887		91.704	88.296		172.971	7.029		139.73	40.27		82.235	97.765		177.028	2.972		107.512	72.488		147.23	32.77		78.265	101.735		162.979	17.021		154.121	25.879		176.06	3.94		179.525	0.475		175.659	4.341			42.9635
		14	34.416	145.584		173.24	6.76		98.474	81.526		173.609	6.391		142.916	37.084		108.435	71.565		177.028	2.972		107.512	72.488		153.821	26.179		97.417	82.583		163.71	16.29		156.472	23.528		176.06	3.94		174.156	5.844		178.639	1.361			38.9397
		15	42.785	137.215		173.907	6.093		132.064	47.936		175.718	4.282		142.916	37.084		108.435	71.565		165.593	14.407		105.631	74.369		159.634	20.366		112.029	67.971		163.384	16.616		173.393	6.607		176.06	3.94		174.156	5.844		178.639	1.361			34.3771
		16	56.52	123.48		173.907	6.093		162.372	17.628		175.718	4.282		154.934	25.066		134.879	45.121		165.593	14.407		96.707	83.293		159.634	20.366		129.067	50.933		162.513	17.487		173.393	6.607		176.06	3.94		178.198	1.802		175.317	4.683			28.3459
		17	84.187	95.813		176.789	3.211		169.961	10.039		175.718	4.282		160.849	19.151		134.879	45.121		164.38	15.62		96.364	83.636		159.634	20.366		129.067	50.933		155.237	24.763		176.703	3.297		176.06	3.94		178.198	1.802		175.317	4.683			25.7771
		18	108.435	71.565		176.789	3.211		169.961	10.039		173.807	6.193		172.774	7.226		142.125	37.875		176.839	3.161		110.828	69.172		164.638	15.362		129.067	50.933		155.237	24.763		176.703	3.297		179.757	0.243		178.198	1.802		175.317	4.683			20.635
		19	108.435	71.565		176.789	3.211		169.961	10.039		173.807	6.193		171.554	8.446		144.689	35.311		176.839	3.161		117.217	62.783		164.638	15.362		142.878	37.122		155.237	24.763		179.4	0.6		179.757	0.243		178.198	1.802		175.317	4.683			19.0189
		20	120.275	59.725		176.789	3.211		173.638	6.362		177.262	2.738		171.554	8.446		168.639	11.361		176.839	3.161		127.49	52.51		164.638	15.362		142.878	37.122		170.944	9.056		179.4	0.6		175.272	4.728		178.198	1.802		175.317	4.683			14.7245
		21	123.593	56.407		176.789	3.211		173.638	6.362		177.262	2.738		171.554	8.446		168.639	11.361		176.839	3.161		154.864	25.136		164.638	15.362		142.878	37.122		170.944	9.056		179.7	0.3		175.272	4.728		178.198	1.802		175.317	4.683			12.6583
		22	123.593	56.407		176.789	3.211		173.638	6.362		177.262	2.738		171.554	8.446		175.359	4.641		173.938	6.062		167.471	12.529		174.942	5.058		142.878	37.122		170.944	9.056		179.7	0.3		175.272	4.728		178.198	1.802		175.317	4.683			10.8763
		23	123.593	56.407		176.789	3.211		173.338	6.662		177.262	2.738		171.554	8.446		175.359	4.641		173.938	6.062		167.471	12.529		174.942	5.058		142.878	37.122		178.475	1.525		179.7	0.3		175.71	4.29		178.198	1.802		175.317	4.683			10.3651
		24	145.491	34.509		176.789	3.211		173.338	6.662		177.262	2.738		171.554	8.446		175.359	4.641		173.938	6.062		172.441	7.559		174.942	5.058		142.878	37.122		178.475	1.525		179.7	0.3		175.71	4.29		178.198	1.802		175.317	4.683			8.57387
		25	145.491	34.509		176.789	3.211		173.426	6.574		177.262	2.738		171.554	8.446		171.327	8.673		173.938	6.062		177.963	2.037		174.942	5.058		154.733	25.267		176.714	3.286		179.7	0.3		175.71	4.29		178.198	1.802		178.264	1.736			7.59927
		26	145.491	34.509		176.789	3.211		173.426	6.574		179.564	0.436		171.554	8.446		171.327	8.673		173.745	6.255		177.963	2.037		174.942	5.058		154.733	25.267		179.04	0.96		179.7	0.3		179.794	0.206		178.198	1.802		178.264	1.736			7.03133
		27	163.168	16.832		176.789	3.211		173.426	6.574		179.564	0.436		171.554	8.446		175.183	4.817		173.745	6.255		175.601	4.399		170.315	9.685		154.733	25.267		179.04	0.96		175.932	4.068		179.794	0.206		178.198	1.802		178.264	1.736			6.31293
		28	163.168	16.832		176.789	3.211		173.426	6.574		179.564	0.436		171.554	8.446		175.183	4.817		170.538	9.462		175.601	4.399		170.362	9.638		161.526	18.474		177.184	2.816		175.932	4.068		179.794	0.206		178.198	1.802		178.264	1.736			6.19447
		29	163.168	16.832		176.789	3.211		172.921	7.079		179.564	0.436		171.554	8.446		175.183	4.817		170.538	9.462		175.601	4.399		170.362	9.638		161.526	18.474		177.184	2.816		175.932	4.068		179.375	0.625		178.198	1.802		178.264	1.736			6.25607
		30	163.168	16.832		176.789	3.211		172.921	7.079		179.564	0.436		171.554	8.446		176.517	3.483		178.728	1.272		175.601	4.399		170.362	9.638		161.526	18.474		177.184	2.816		175.932	4.068		179.375	0.625		174.525	5.475		178.264	1.736			5.866
[truncated: 2 more columns]

## Sheet: Figure 3E
20190819
		line	WT
		treatment
			1	1comp		2	2comp		3	3comp		4	4comp		5	5comp		6	6comp		7	7comp		8	8comp		9	9comp		10	10comp		11	11comp		12	12comp		13	13comp		14	14comp		15	15comp			average
		1	4.635	175.365		6.896	173.104		8.973	171.027		7.346	172.654		5.356	174.644		3.29	176.71		3.27	176.73		4.05	175.95		9.35	170.65		3.38	176.62		5.268	174.732		2.246	177.754		2.603	177.397		2.862	177.138		2.974	177.026			175.167
		2	7.496	172.504		26.319	153.681		8.973	171.027		7.346	172.654		18.435	161.565		6.855	173.145		14.931	165.069		17.646	162.354		14.036	165.964		15.418	164.582		6.34	173.66		3.805	176.195		2.603	177.397		8.057	171.943		15.709	164.291			168.402
		3	15.362	164.638		70.853	109.147		27.949	152.051		13.475	166.525		28.877	151.123		41.07	138.93		31.293	148.707		42.031	137.969		23.035	156.965		28.9	151.1		41.271	138.729		10.6	169.4		24.013	155.987		25.543	154.457		25.067	154.933			150.044
		4	24.487	155.513		70.853	109.147		27.949	152.051		24.198	155.802		49.97	130.03		66.077	113.923		31.293	148.707		41.876	138.124		51.911	128.089		28.9	151.1		44.407	135.593		21.418	158.582		24.013	155.987		25.543	154.457		25.067	154.933			142.803
		5	24.487	155.513		68.911	111.089		55.749	124.251		24.198	155.802		71.042	108.958		67.286	112.714		42.51	137.49		32.414	147.586		45.153	134.847		30.964	149.036		59.09	120.91		81.193	98.807		16.77	163.23		32.365	147.635		25.067	154.933			134.853
		6	24.487	155.513		68.911	111.089		68.614	111.386		24.198	155.802		82.349	97.651		68.009	111.991		42.51	137.49		32.414	147.586		43.423	136.577		43.523	136.477		73.443	106.557		81.193	98.807		16.77	163.23		47.379	132.621		25.067	154.933			130.514
		7	36.254	143.746		76.036	103.964		92.49	87.51		26.131	153.869		101.31	78.69		68.009	111.991		64.654	115.346		31.724	148.276		43.423	136.577		90.356	89.644		91.652	88.348		100.305	79.695		31.19	148.81		45.22	134.78		27.362	152.638			118.259
		8	36.254	143.746		85.556	94.444		136.469	43.531		26.131	153.869		110.925	69.075		132.51	47.49		64.654	115.346		37.372	142.628		32.25	147.75		134.301	45.699		114.489	65.511		104.859	75.141		31.19	148.81		42.258	137.742		27.362	152.638			105.561
		9	43.964	136.036		103.022	76.978		155.583	24.417		26.131	153.869		122.433	57.567		149.036	30.964		79.695	100.305		57.381	122.619		44.686	135.314		145.008	34.992		136.116	43.884		94.247	85.753		38.991	141.009		98.807	81.193		27.362	152.638			91.8359
		10	37.899	142.101		144.286	35.714		168.69	11.31		30.317	149.683		122.433	57.567		159.67	20.33		79.695	100.305		97.957	82.043		44.686	135.314		169.616	10.384		114.775	65.225		111.514	68.486		38.991	141.009		121.139	58.861		27.362	152.638			82.0647
		11	41.785	138.215		161.378	18.622		175.684	4.316		41.884	138.116		122.433	57.567		163.066	16.934		110.659	69.341		138.945	41.055		59.493	120.507		176.371	3.629		134.604	45.396		135.632	44.368		40.601	139.399		150.239	29.761		33.176	146.824			67.6033
		12	44.738	135.262		168.69	11.31		175.684	4.316		79.59	100.41		140.023	39.977		173.194	6.806		150.781	29.219		147.829	32.171		125.707	54.293		178.345	1.655		136.325	43.675		150.892	29.108		44.411	135.589		151.522	28.478		97.125	82.875			49.0096
		13	54.136	125.864		168.69	11.31		175.684	4.316		93.41	86.59		169.582	10.418		173.194	6.806		150.781	29.219		160.875	19.125		171.87	8.13		178.345	1.655		150.945	29.055		162.953	17.047		63.257	116.743		151.522	28.478		141.406	38.594			35.5567
		14	72.419	107.581		168.69	11.31		173.856	6.144		111.93	68.07		176.769	3.231		173.027	6.973		150.781	29.219		160.875	19.125		176.89	3.11		178.345	1.655		159.692	20.308		168.111	11.889		77.191	102.809		162.525	17.475		176.689	3.311			27.4807
		15	83.729	96.271		173.157	6.843		175.449	4.551		154.936	25.064		176.769	3.231		173.027	6.973		158.49	21.51		178.968	1.032		176.89	3.11		178.345	1.655		159.692	20.308		179.739	0.261		92.603	87.397		171.643	8.357		179.115	0.885			19.1632
		16	94.764	85.236		172.583	7.417		175.449	4.551		161.565	18.435		176.032	3.968		173.027	6.973		161.616	18.384		178.968	1.032		175.703	4.297		178.345	1.655		151.876	28.124		176.278	3.722		112.04	67.96		178.995	1.005		179.31	0.69			16.8966
		17	111.866	68.134		172.583	7.417		175.449	4.551		173.311	6.689		165.023	14.977		179.499	0.501		168.156	11.844		178.968	1.032		171.983	8.017		178.679	1.321		151.876	28.124		176.278	3.722		112.04	67.96		174.958	5.042		179.31	0.69			15.3347
		18	104.621	75.379		172.583	7.417		175.074	4.926		173.311	6.689		161.565	18.435		179.499	0.501		179.379	0.621		178.968	1.032		176.689	3.311		178.679	1.321		158.199	21.801		177.486	2.514		132.709	47.291		178.868	1.132		178.603	1.397			12.9178
		19	136.11	43.89		168.899	11.101		175.074	4.926		177.955	2.045		171.674	8.326		179.499	0.501		179.379	0.621		178.968	1.032		176.689	3.311		178.21	1.79		158.199	21.801		177.486	2.514		132.709	47.291		178.868	1.132		176.987	3.013			10.2196
		20	135	45		178.906	1.094		175.595	4.405		170.227	9.773		171.674	8.326		179.499	0.501		170.134	9.866		179.423	0.577		179.624	0.376		178.21	1.79		154.923	25.077		177.486	2.514		138.18	41.82		178.868	1.132		180	0			10.1501
		21	147.995	32.005		177.341	2.659		177.12	2.88		167.795	12.205		163.484	16.516		179.694	0.306		173.418	6.582		179.423	0.577		179.624	0.376		178.21	1.79		151.404	28.596		177.486	2.514		149.996	30.004		174.806	5.194		180	0			9.48027
		22	147.995	32.005		177.341	2.659		177.12	2.88		173.465	6.535		163.484	16.516		178.995	1.005		173.418	6.582		179.606	0.394		178.069	1.931		177.07	2.93		151.404	28.596		177.486	2.514		156.185	23.815		176.149	3.851		178.076	1.924			8.94247
		23	155.426	24.574		177.337	2.663		177.12	2.88		173.465	6.535		168.007	11.993		178.995	1.005		173.418	6.582		179.606	0.394		178.069	1.931		177.07	2.93		151.404	28.596		173.776	6.224		167.84	12.16		176.149	3.851		178.076	1.924			7.61613
		24	163.637	16.363		177.337	2.663		177.862	2.138		173.465	6.535		169.824	10.176		178.995	1.005		173.418	6.582		175.659	4.341		180	0		178.38	1.62		154.704	25.296		168.877	11.123		167.84	12.16		179.115	0.885		180	0			6.7258
		25	175.506	4.494		176.002	3.998		177.862	2.138		166.228	13.772		178.069	1.931		178.993	1.007		176.474	3.526		178.152	1.848		175.058	4.942		178.38	1.62		154.704	25.296		171.254	8.746		172.701	7.299		179.115	0.885		180	0			5.43347
		26	175.506	4.494		176.002	3.998		177.862	2.138		168.469	11.531		173.991	6.009		178.159	1.841		176.474	3.526		175.415	4.585		179.861	0.139		178.38	1.62		161.96	18.04		173.66	6.34		172.701	7.299		177.656	2.344		177.567	2.433			5.08913
		27	175.506	4.494		178.928	1.072		177.862	2.138		174.162	5.838		179.395	0.605		178.159	1.841		176.474	3.526		179.36	0.64		179.861	0.139		177.493	2.507		161.96	18.04		173.66	6.34		172.701	7.299		177.656	2.344		178.52	1.48			3.88687
		28	175.506	4.494		178.928	1.072		177.862	2.138		174.162	5.838		179.395	0.605		178.159	1.841		176.474	3.526		175.833	4.167		179.138	0.862		177.493	2.507		161.96	18.04		177.879	2.121		170.198	9.802		177.656	2.344		179.153	0.847			4.0136
		29	173.46	6.54		178.928	1.072		177.862	2.138		174.162	5.838		179.395	0.605		178.159	1.841		176.474	3.526		179.322	0.678		178.427	1.573		177.368	2.632		161.96	18.04		177.879	2.121		170.198	9.802		177.274	2.726		179.153	0.847			3.9986
		30	179.366	0.634		178.928	1.072		177.862	2.138		178.044	1.956		175.272	4.728		178.159	1.841		176.474	3.526		179.322	0.678		178.946	1.054		177.368	2.632		161.96	18.04		177.879	2.121		176.035	3.965		177.274	2.726		178.781	1.219			3.222
		line	35S FUL
		treatment
			1	1comp		2	2comp		3	3comp		4	4comp		5	5comp		6	6comp		7	7comp		8	8comp		9	9comp		10	10comp		11	11comp		12	12comp		13	13comp		14	14comp		15	15comp			average
		1	5.906	174.094		8.276	171.724		2.977	177.023		4.379	175.621		4.396	175.604		6.565	173.435		4.133	175.867		1.635	178.365		3.639	176.361		3.462	176.538		7.658	172.342		7.533	172.467		2.535	177.465		3.951	176.049		3.366	176.634			175.306
		2	11.908	168.092		8.276	171.724		4.379	175.621		4.379	175.621		4.396	175.604		27.306	152.694		4.133	175.867		4.732	175.268		10.965	169.035		9.103	170.897		14.22	165.78		7.533	172.467		8.618	171.382		3.951	176.049		18.585	161.415			170.501
		3	11.908	168.092		8.276	171.724		9.593	170.407		7.492	172.508		11.589	168.411		66.984	113.016		8.197	171.803		4.732	175.268		10.965	169.035		9.462	170.538		32.817	147.183		30.75	149.25		8.618	171.382		11.812	168.188		18.585	161.415			163.215
		4	23.839	156.161		25.576	154.424		13.841	166.159		10.887	169.113		28.132	151.868		67.38	112.62		8.197	171.803		4.732	175.268		12.82	167.18		14.289	165.711		61.091	118.909		32.633	147.367		11.472	168.528		11.812	168.188		20.695	159.305			156.84
		5	28.524	151.476		25.576	154.424		39.275	140.725		10.887	169.113		25.463	154.537		67.38	112.62		8.197	171.803		12.208	167.792		12.82	167.18		14.289	165.711		61.091	118.909		45.296	134.704		23.89	156.11		12.875	167.125		25.84	154.16			152.426
		6	28.524	151.476		25.576	154.424		39.275	140.725		10.341	169.659		25.463	154.537		83.025	96.975		19.738	160.262		12.208	167.792		12.82	167.18		14.289	165.711		80.514	99.486		45.296	134.704		23.89	156.11		12.875	167.125		25.84	154.16			149.355
		7	28.524	151.476		41.186	138.814		47.504	132.496		21.192	158.808		41.878	138.122		83.025	96.975		29.517	150.483		12.208	167.792		17.115	162.885		18.854	161.146		80.514	99.486		49.042	130.958		50.931	129.069		44.409	135.591		32.137	147.863			140.131
		8	42.145	137.855		41.186	138.814		47.504	132.496		18.991	161.009		41.878	138.122		92.188	87.812		50.225	129.775		31.226	148.774		17.115	162.885		22.173	157.827		105.329	74.671		57.133	122.867		60.018	119.982		66.501	113.499		40.443	139.557			131.063
		9	110.791	69.209		81.2	98.8		40.909	139.091		23.873	156.127		42.533	137.467		105.803	74.197		50.225	129.775		31.226	148.774		21.721	158.279		22.173	157.827		134.256	45.744		57.133	122.867		60.018	119.982		80.611	99.389		40.443	139.557			119.806
		10	121.009	58.991		108.352	71.648		45.433	134.567		55.246	124.754		42.533	137.467		105.803	74.197		65.685	114.315		34.441	145.559		21.721	158.279		33.09	146.91		134.256	45.744		68.516	111.484		69.852	110.148		88.636	91.364		52.537	127.463			110.193
		11	137.038	42.962		143.958	36.042		60.604	119.396		62.747	117.253		54.782	125.218		136.419	43.581		92.013	87.987		34.441	145.559		30.687	149.313		43.524	136.476		136.104	43.896		70.23	109.77		77.869	102.131		99.462	80.538		72.342	107.658			96.5187
		12	140.29	39.71		166.182	13.818		79.771	100.229		76.264	103.736		112.311	67.689		136.419	43.581		124.967	55.033		28.429	151.571		61.013	118.987		65.136	114.864		136.104	43.896		70.23	109.77		101.114	78.886		99.462	80.538		85.714	94.286			81.1063
		13	140.29	39.71		174.849	5.151		90	90		97.765	82.235		112.311	67.689		170.445	9.555		136.254	43.746		28.429	151.571		76.273	103.727		85.006	94.994		164.441	15.559		64.049	115.951		169.821	10.179		99.462	80.538		107.736	72.264			65.5246
		14	140.29	39.71		171.384	8.616		106.287	73.713		111.801	68.199		140.804	39.196		170.445	9.555		165.082	14.918		33.69	146.31		135.388	44.612		109.754	70.246		168.69	11.31		70.452	109.548		160.71	19.29		104.517	75.483		125.97	54.03			52.3157
		15	145.045	34.955		171.384	8.616		106.287	73.713		120.615	59.385		165.551	14.449		179.439	0.561		168.24	11.76		65.641	114.359		149.168	30.832		120.053	59.947		168.69	11.31		94.651	85.349		160.71	19.29		125.859	54.141		140.898	39.102			41.1846
		16	145.045	34.955		171.384	8.616		150.198	29.802		126.215	53.785		165.551	14.449		179.439	0.561		168.69	11.31		151.887	28.113		149.168	30.832		143.139	36.861		173.442	6.558		125.801	54.199		174.515	5.485		134.516	45.484		157.38	22.62			25.5753
		17	145.045	34.955		171.384	8.616		150.198	29.802		151.159	28.841		172.725	7.275		179.439	0.561		170.87	9.13		178.283	1.717		166.524	13.476		151.89	28.11		173.442	6.558		176.74	3.26		171.027	8.973		168.748	11.252		157.38	22.62			14.3431
		18	156.054	23.946		175.774	4.226		150.198	29.802		159.905	20.095		172.725	7.275		179.439	0.561		177.274	2.726		178.283	1.717		174.745	5.255		172.281	7.719		175.236	4.764		176.672	3.328		174.038	5.962		168.748	11.252		160.891	19.109			9.84913
		19	156.054	23.946		175.774	4.226		165.359	14.641		179.123	0.877		168.092	11.908		173.692	6.308		177.274	2.726		178.283	1.717		174.745	5.255		174.13	5.87		175.236	4.764		176.672	3.328		180	0		176.593	3.407		161.565	18.435			7.16053
		20	173.089	6.911		175.774	4.226		165.359	14.641		179.123	0.877		168.092	11.908		173.692	6.308		179.288	0.712		176.934	3.066		174.745	5.255		177.138	2.862		175.236	4.764		176.672	3.328		180	0		179.961	0.039		176.007	3.993			4.59267
		21	173.089	6.911		175.774	4.226		174.987	5.013		179.123	0.877		178.485	1.515		176.877	3.123		179.288	0.712		176.934	3.066		179.036	0.964		177.138	2.862		178.082	1.918		172.993	7.007		178.169	1.831		179.961	0.039		176.007	3.993			2.93713
		22	173.089	6.911		175.657	4.343		174.987	5.013		168.554	11.446		178.485	1.515		176.877	3.123		179.288	0.712		178.262	1.738		179.036	0.964		175.661	4.339		178.082	1.918		171.25	8.75		178.169	1.831		176.822	3.178		177.663	2.337			3.87453
		23	177.148	2.852		175.657	4.343		174.987	5.013		171.027	8.973		178.255	1.745		166.624	13.376		177.434	2.566		172.714	7.286		179.928	0.072		179.777	0.223		178.082	1.918		168.672	11.328		177.754	2.246		179.241	0.759		177.663	2.337			4.3358
		24	174.695	5.305		175.657	4.343		174.987	5.013		170.916	9.084		178.255	1.745		170.759	9.241		178.564	1.436		172.714	7.286		179.928	0.072		179.777	0.223		178.082	1.918		171.563	8.437		177.754	2.246		179.241	0.759		177.663	2.337			3.963
		25	174.695	5.305		175.657	4.343		178.89	1.11		178.687	1.313		178.912	1.088		170.088	9.912		178.353	1.647		178.219	1.781		179.928	0.072		179.107	0.893		178.493	1.507		177.469	2.531		176.176	3.824		179.241	0.759		177.663	2.337			2.56147
		26	174.695	5.305		179.708	0.292		178.89	1.11		178.687	1.313		167.745	12.255		171.197	8.803		179.897	0.103		178.219	1.781		176.801	3.199		179.107	0.893		178.493	1.507		177.469	2.531		177.791	2.209		179.241	0.759		177.663	2.337			2.9598
		27	174.695	5.305		179.708	0.292		178.89	1.11		178.687	1.313		166.401	13.599		171.197	8.803		179.897	0.103		178.219	1.781		178.087	1.913		179.107	0.893		178.493	1.507		174.195	5.805		177.791	2.209		178.449	1.551		177.663	2.337			3.23473
		28	171.027	8.973		179.708	0.292		178.89	1.11		177.745	2.255		179.249	0.751		170.863	9.137		179.945	0.055		178.219	1.781		178.087	1.913		179.107	0.893		178.493	1.507		174.195	5.805		178.303	1.697		178.449	1.551		177.663	2.337			2.67047
		29	171.511	8.489		179.708	0.292		178.89	1.11		179.959	0.041		179.249	0.751		170.863	9.137		179.945	0.055		177.497	2.503		178.62	1.38		179.107	0.893		178.493	1.507		174.195	5.805		178.303	1.697		178.449	1.551		177.663	2.337			2.5032
		30	179.855	0.145		177.629	2.371		178.89	1.11		179.959	0.041		175.983	4.017		174.366	5.634		179.945	0.055		179.934	0.066		178.62	1.38		178.959	1.041		178.493	1.507		179.63	0.37		178.303	1.697		178.418	1.582		178.152	1.848			1.52427
20190207
		line	WT
		treatment
			1	1comp		2	2comp		3	3comp		4	4comp		5	5comp		6	6comp		7	7comp		8	8comp		9	9comp		10	10comp		11	11comp		12	12comp		13	13comp		14	14comp		15	15comp			average
		1	1.915	178.085		8.13	171.87		6.112	173.888		5.369	174.631		3.038	176.962		5.134	174.866		1.248	178.752		1.685	178.315		3.779	176.221		5.6	174.4		2.609	177.391		2.42	177.58		3.861	176.139		3.091	176.909		3.722	176.278			176.152
		2	1.915	178.085		19.983	160.017		7.458	172.542		5.369	174.631		3.038	176.962		5.134	174.866		11.068	168.932		1.685	178.315		3.779	176.221		5.6	174.4		2.609	177.391		17.447	162.553		6.234	173.766		6.995	173.005		5.455	174.545			173.082
		3	1.915	178.085		43.531	136.469		15.156	164.844		15.171	164.829		21.59	158.41		5.134	174.866		48.87	131.13		7.595	172.405		8.403	171.597		8.973	171.027		11.07	168.93		27.708	152.292		21.812	158.188		20.726	159.274		8.577	171.423			162.251
		4	20.138	159.862		80.569	99.431		124.051	55.949		28.77	151.23		99.984	80.016		18.339	161.661		91.603	88.397		36.027	143.973		39.289	140.711		39.601	140.399		13.68	166.32		34.289	145.711		63.745	116.255		45	135		60.796	119.204			126.941
		5	38.544	141.456		131.781	48.219		144.593	35.407		117.501	62.499		106.144	73.856		26.187	153.813		73.443	106.557		23.668	156.332		63.625	116.375		39.601	140.399		29.606	150.394		46.136	133.864		99.751	80.249		44.611	135.389		56.344	123.656			110.564
		6	101.68	78.32		145	35		133.737	46.263		126.87	53.13		98.846	81.154		120.964	59.036		117.329	62.671		23.668	156.332		109.116	70.884		138.18	41.82		84.196	95.804		47.944	132.056		99.751	80.249		70.004	109.996		71.311	108.689			80.7603
		7	131.491	48.509		145	35		161.482	18.518		107.819	72.181		90.423	89.577		126.87	53.13		147.995	32.005		35.751	144.249		120.038	59.962		157.249	22.751		93.3	86.7		75.495	104.505		101.744	78.256		93.727	86.273		78.436	101.564			68.8787
		8	131.491	48.509		165.027	14.973		177.537	2.463		115.925	64.075		91.288	88.712		130.135	49.865		161.761	18.239		67.675	112.325		135.119	44.881		159.753	20.247		114.761	65.239		101.124	78.876		151.228	28.772		111.435	68.565		77.493	102.507			53.8832
		9	148.755	31.245		171.147	8.853		177.537	2.463		103.298	76.702		86.439	93.561		155.376	24.624		167.171	12.829		101.195	78.805		160.073	19.927		169.174	10.826		142.155	37.845		140.261	39.739		156.371	23.629		152.286	27.714		93.366	86.634			38.3597
		10	162.537	17.463		171.147	8.853		178.946	1.054		116.002	63.998		101.95	78.05		166.289	13.711		165.419	14.581		113.715	66.285		164.381	15.619		167.005	12.995		149.197	30.803		143.13	36.87		168.786	11.214		172.918	7.082		111.654	68.346			29.7949
		11	162.537	17.463		168.643	11.357		178.946	1.054		116.002	63.998		114.741	65.259		174.644	5.356		173.721	6.279		149.528	30.472		174.089	5.911		167.8	12.2		149.197	30.803		138.099	41.901		172.484	7.516		178.059	1.941		119.079	60.921			24.1621
		12	144.657	35.343		168.643	11.357		174.102	5.898		118.692	61.308		133.315	46.685		174.644	5.356		173.721	6.279		162.411	17.589		174.089	5.911		167.8	12.2		149.197	30.803		146.229	33.771		171.392	8.608		178.059	1.941		128.806	51.194			22.2829
		13	144.657	35.343		168.643	11.357		174.472	5.528		118.692	61.308		149.31	30.69		168.862	11.138		175.236	4.764		173.401	6.599		178.172	1.828		169.571	10.429		167.002	12.998		154.599	25.401		179.82	0.18		178.059	1.941		136.45	43.55			17.5369
		14	144.657	35.343		173.178	6.822		174.472	5.528		118.142	61.858		155.236	24.764		168.862	11.138		179.462	0.538		173.401	6.599		178.172	1.828		171.988	8.012		166.866	13.134		146.761	33.239		178.311	1.689		178.059	1.941		141.888	38.112			16.703
		15	151.512	28.488		169.92	10.08		174.472	5.528		118.142	61.858		155.236	24.764		168.862	11.138		179.462	0.538		173.401	6.599		179.344	0.656		171.988	8.012		166.866	13.134		146.761	33.239		178.311	1.689		178.059	1.941		141.888	38.112			16.3851
		16	151.512	28.488		178.199	1.801		174.472	5.528		118.142	61.858		155.236	24.764		168.862	11.138		179.462	0.538		173.401	6.599		179.344	0.656		171.988	8.012		166.866	13.134		160.615	19.385		178.311	1.689		178.059	1.941		141.888	38.112			14.9095
		17	151.512	28.488		176.927	3.073		175.84	4.16		130.236	49.764		171.741	8.259		168.862	11.138		175.415	4.585		171.901	8.099		179.344	0.656		175.45	4.55		174.177	5.823		160.615	19.385		180	0		178.059	1.941		157.971	22.029			11.4633
		18	154.058	25.942		176.927	3.073		175.84	4.16		130.236	49.764		165.276	14.724		170.557	9.443		178.423	1.577		176.147	3.853		179.384	0.616		175.45	4.55		174.177	5.823		175.428	4.572		180	0		178.315	1.685		163.748	16.252			9.7356
		19	161.896	18.104		176.927	3.073		175.84	4.16		133.446	46.554		164.932	15.068		170.557	9.443		178.423	1.577		176.147	3.853		179.384	0.616		175.45	4.55		178.127	1.873		178.159	1.841		180	0		176.201	3.799		163.748	16.252			8.71753
		20	162.962	17.038		176.927	3.073		175.84	4.16		133.446	46.554		164.932	15.068		170.557	9.443		178.423	1.577		179.861	0.139		179.384	0.616		173.311	6.689		175.374	4.626		178.159	1.841		178.615	1.385		176.201	3.799		167.171	12.829			8.58913
		21	167.56	12.44		175.79	4.21		179.843	0.157		133.446	46.554		170.293	9.707		175.958	4.042		178.423	1.577		179.861	0.139		179.384	0.616		174.401	5.599		178.517	1.483		177.133	2.867		178.615	1.385		176.934	3.066		166.357	13.643			7.16567
		22	163.07	16.93		173.48	6.52		179.843	0.157		137.408	42.592		170.293	9.707		175.958	4.042		178.423	1.577		179.861	0.139		178.74	1.26		174.774	5.226		178.517	1.483		177.133	2.867		176.372	3.628		176.934	3.066		166.357	13.643			7.52247
		23	163.07	16.93		173.48	6.52		173.748	6.252		148.504	31.496		176.942	3.058		175.958	4.042		178.906	1.094		179.861	0.139		178.74	1.26		174.774	5.226		178.517	1.483		176.906	3.094		179.959	0.041		174.179	5.821		166.357	13.643			6.67327
		24	159.71	20.29		175.003	4.997		173.748	6.252		148.504	31.496		176.942	3.058		179.329	0.671		178.906	1.094		179.861	0.139		178.205	1.795		174.774	5.226		178.517	1.483		176.906	3.094		179.959	0.041		176.89	3.11		166.357	13.643			6.42593
		25	159.71	20.29		175.14	4.86		173.748	6.252		155.2	24.8		177.284	2.716		179.329	0.671		178.906	1.094		179.843	0.157		178.205	1.795		174.774	5.226		178.517	1.483		176.906	3.094		179.959	0.041		176.89	3.11		174.122	5.878			5.43113
		26	162.646	17.354		175.14	4.86		179.318	0.682		155.83	24.17		177.284	2.716		179.329	0.671		178.906	1.094		179.843	0.157		177.13	2.87		170.34	9.66		178.517	1.483		176.906	3.094		179.959	0.041		179.091	0.909		174.122	5.878			5.0426
		27	162.646	17.354		175.14	4.86		178.753	1.247		157.293	22.707		177.284	2.716		179.168	0.832		178.906	1.094		179.843	0.157		177.13	2.87		178.047	1.953		173.509	6.491		176.906	3.094		177.505	2.495		179.091	0.909		175.721	4.279			4.87053
		28	164.892	15.108		175.14	4.86		178.753	1.247		156.644	23.356		163.67	16.33		179.168	0.832		178.906	1.094		179.843	0.157		177.13	2.87		178.047	1.953		177.406	2.594		176.906	3.094		177.505	2.495		179.091	0.909		175.721	4.279			5.41187
		29	171.699	8.301		175.14	4.86		172.535	7.465		162.313	17.687		179.72	0.28		179.168	0.832		178.906	1.094		173.66	6.34		177.13	2.87		178.047	1.953		177.406	2.594		176.906	3.094		178.222	1.778		179.854	0.146		174.237	5.763			4.33713
		30	174.182	5.818		175.14	4.86		176.128	3.872		167.905	12.095		179.72	0.28		179.168	0.832		178.906	1.094		178.654	1.346		177.13	2.87		178.047	1.953		177.406	2.594		176.533	3.467		178.222	1.778		179.854	0.146		174.237	5.763			3.2512
		line	35S FUL
		treatment
			1	1comp		2	2comp		3	3comp		4	4comp		5	5comp		6	6comp		7	7comp		8	8comp		9	9comp		10	10comp		11	11comp		12	12comp		13	13comp		14	14comp		15	15comp			average
		1	3.201	176.799		2.951	177.049		5.699	174.301		3.485	176.515		2.947	177.053		2.347	177.653		2.613	177.387		1.19	178.81		6.93	173.07		2.966	177.034		1.478	178.522		3.082	176.918		4.97	175.03		4.825	175.175		8.847	171.153			176.165
		2	8.792	171.208		2.951	177.049		5.159	174.841		3.485	176.515		2.947	177.053		2.347	177.653		2.613	177.387		1.19	178.81		12.222	167.778		7.467	172.533		3.137	176.863		3.082	176.918		4.97	175.03		4.825	175.175		8.847	171.153			175.064
		3	20.371	159.629		5.478	174.522		10.273	169.727		5.711	174.289		7.907	172.093		6.592	173.408		11.041	168.959		6.461	173.539		53.973	126.027		23.4	156.6		6.34	173.66		19.125	160.875		6.501	173.499		4.825	175.175		36.996	143.004			165
		4	33.039	146.961		17.452	162.548		24.038	155.962		8.461	171.539		6.165	173.835		26.497	153.503		29.537	150.463		6.461	173.539		73.489	106.511		24.775	155.225		10.577	169.423		39.024	140.976		6.501	173.499		10.371	169.629		48.094	131.906			155.701
		5	50.194	129.806		17.992	162.008		43.044	136.956		17.515	162.485		6.684	173.316		42.133	137.867		34.461	145.539		12.009	167.991		78.959	101.041		25.508	154.492		15.747	164.253		51.75	128.25		6.501	173.499		10.371	169.629		42.64	137.36			149.633
		6	82.259	97.741		30.26	149.74		48.398	131.602		22.039	157.961		16.82	163.18		74.937	105.063		57.226	122.774		17.65	162.35		70.06	109.94		25.508	154.492		15.747	164.253		71.809	108.191		14.1	165.9		10.371	169.629		81.682	98.318			137.409
		7	79.444	100.556		45.847	134.153		65.421	114.579		27.047	152.953		24.372	155.628		126.808	53.192		57.226	122.774		32.034	147.966		73.536	106.464		20.335	159.665		27.339	152.661		101.31	78.69		14.1	165.9		14.576	165.424		88.881	91.119			126.782
		8	83.625	96.375		52.889	127.111		87.08	92.92		27.047	152.953		26.053	153.947		163.355	16.645		60.416	119.584		59.01	120.99		85.437	94.563		29.413	150.587		26.452	153.548		101.31	78.69		19.581	160.419		14.576	165.424		114.944	65.056			116.587
		9	93.731	86.269		61.713	118.287		104.931	75.069		45.384	134.616		25.812	154.188		173.736	6.264		60.416	119.584		75.764	104.236		110.844	69.156		28.26	151.74		23.573	156.427		139.465	40.535		51.032	128.968		15.535	164.465		118.103	61.897			104.78
		10	115.225	64.775		71.845	108.155		110.372	69.628		60.585	119.415		66.153	113.847		169.862	10.138		84.116	95.884		79.935	100.065		129.89	50.11		31.909	148.091		27.861	152.139		156.292	23.708		67.892	112.108		34.846	145.154		141.527	38.473			90.1127
		11	131.189	48.811		92.86	87.14		133.13	46.87		60.585	119.415		81.386	98.614		170.134	9.866		84.116	95.884		87.73	92.27		139.185	40.815		41.695	138.305		35.213	144.787		171.171	8.829		90.507	89.493		47.42	132.58		141.527	38.473			79.4768
		12	124.42	55.58		119.84	60.16		136.838	43.162		69.119	110.881		115.317	64.683		160.419	19.581		114.9	65.1		99.982	80.018		144.791	35.209		54.961	125.039		42.352	137.648		166.842	13.158		108.91	71.09		63.189	116.811		159.895	20.105			67.8817
		13	138.485	41.515		130.03	49.97		157.486	22.514		96.13	83.87		126.851	53.149		160.419	19.581		122.743	57.257		100.089	79.911		160.241	19.759		75.616	104.384		73.349	106.651		176.62	3.38		142.392	37.608		63.189	116.811		169.464	10.536			53.7931
		14	138.055	41.945		136.011	43.989		157.486	22.514		128.328	51.672		143.488	36.512		160.419	19.581		135.126	44.874		112.474	67.526		160.241	19.759		103.952	76.048		117.897	62.103		176.62	3.38		151.819	28.181		90.763	89.237		169.464	10.536			41.1905
		15	144.594	35.406		147.691	32.309		162.207	17.793		154.429	25.571		151.146	28.854		154.143	25.857		145.627	34.373		132.838	47.162		167.375	12.625		109.92	70.08		149.752	30.248		176.62	3.38		167.879	12.121		90.763	89.237		179.705	0.295			31.0207
		16	147.321	32.679		150.844	29.156		167.765	12.235		154.429	25.571		164.027	15.973		154.143	25.857		145.627	34.373		132.838	47.162		168.802	11.198		125.538	54.462		170.538	9.462		176.62	3.38		180	0		90.763	89.237		179.705	0.295			26.0693
		17	158.928	21.072		150.182	29.818		167.765	12.235		155.161	24.839		179.769	0.231		158.673	21.327		162.239	17.761		132.838	47.162		168.802	11.198		125.538	54.462		170.538	9.462		179.37	0.63		180	0		118.072	61.928		179.705	0.295			20.828
		18	158.791	21.209		162.329	17.671		170.545	9.455		155.161	24.839		176.414	3.586		168.345	11.655		162.239	17.761		137.49	42.51		168.802	11.198		128.378	51.622		170.538	9.462		179.37	0.63		173.65	6.35		118.072	61.928		179.705	0.295			19.3447
		19	158.791	21.209		162.97	17.03		172.357	7.643		159.493	20.507		176.414	3.586		168.345	11.655		162.239	17.761		122.019	57.981		173.264	6.736		139.297	40.703		170.538	9.462		179.37	0.63		173.656	6.344		118.072	61.928		179.705	0.295			18.898
		20	152.936	27.064		164.913	15.087		179.833	0.167		166.977	13.023		173.61	6.39		168.345	11.655		162.688	17.312		138.353	41.647		178.781	1.219		139.297	40.703		175.52	4.48		174.094	5.906		173.656	6.344		118.072	61.928		179.705	0.295			16.8813
		21	161.03	18.97		170.722	9.278		179.833	0.167		166.977	13.023		178.988	1.012		168.363	11.637		162.688	17.312		138.353	41.647		178.445	1.555		139.444	40.556		175.52	4.48		174.094	5.906		173.656	6.344		137.798	42.202		179.705	0.295			14.2923
		22	161.03	18.97		170.722	9.278		176.85	3.15		166.977	13.023		178.988	1.012		168.363	11.637		162.688	17.312		124.069	55.931		175.89	4.11		139.444	40.556		175.52	4.48		174.094	5.906		174.472	5.528		137.798	42.202		179.705	0.295			15.5593
		23	160.141	19.859		170.902	9.098		176.85	3.15		169.014	10.986		178.988	1.012		168.681	11.319		170.415	9.585		152.919	27.081		172.057	7.943		144.741	35.259		175.52	4.48		174.094	5.906		174.472	5.528		137.798	42.202		179.705	0.295			12.9135
		24	160.141	19.859		175.076	4.924		171.486	8.514		171.219	8.781		178.988	1.012		168.681	11.319		170.415	9.585		138.576	41.424		178.059	1.941		144.741	35.259		175.52	4.48		177.614	2.386		174.472	5.528		147.98	32.02		178.685	1.315			12.5565
		25	160.825	19.175		167.891	12.109		171.382	8.618		171.219	8.781		179.459	0.541		168.681	11.319		175.386	4.614		146.328	33.672		178.059	1.941		143.549	36.451		175.52	4.48		177.614	2.386		176.383	3.617		159.864	20.136		178.685	1.315			11.277
		26	160.825	19.175		170.938	9.062		169.736	10.264		174.619	5.381		179.459	0.541		172.666	7.334		179.478	0.522		159.859	20.141		178.059	1.941		143.549	36.451		179.785	0.215		177.614	2.386		176.383	3.617		160.785	19.215		178.685	1.315			9.17067
		27	161.339	18.661		170.786	9.214		166.077	13.923		174.898	5.102		178.069	1.931		172.666	7.334		179.478	0.522		163.753	16.247		178.059	1.941		143.13	36.87		179.785	0.215		174.192	5.808		176.383	3.617		168.075	11.925		178.685	1.315			8.975
		28	161.339	18.661		171.116	8.884		166.077	13.923		174.898	5.102		176.617	3.383		172.666	7.334		177.056	2.944		169.663	10.337		178.059	1.941		143.13	36.87		176.906	3.094		174.192	5.808		176.383	3.617		168.075	11.925		178.685	1.315			9.0092
		29	161.339	18.661		171.116	8.884		165.727	14.273		177.524	2.476		174.623	5.377		172.666	7.334		177.056	2.944		174.995	5.005		178.059	1.941		147.618	32.382		176.906	3.094		174.192	5.808		175.368	4.632		172.197	7.803		174.981	5.019			8.37553
		30	167.45	12.55		176.13	3.87		170.151	9.849		177.524	2.476		179.551	0.449		170.784	9.216		177.056	2.944		178.808	1.192		178.059	1.941		147.618	32.382		176.906	3.094		174.192	5.808		175.368	4.632		172.197	7.803		174.981	5.019			6.88167
20190325
	line	WT
	treatment
		1	1comp		2	2comp		3	3comp		4	4comp		5	5comp		6	6comp		7	7comp		8	8comp		9	9comp		10	10comp		11	11comp		12	12comp		13	13comp		14	14comp		15	15comp			average	n
	1	1.909	178.091		2.453	177.547		1.212	178.788		5.241	174.759		2.397	177.603		1.897	178.103		3.626	176.374		1.848	178.152		3.593	176.407		1.848	178.152		1.989	178.011		0.797	179.203		1.164	178.836		1.7	178.3		4.485	175.515			177.589	15
	2	5.43	174.57		4.802	175.198		1.212	178.788		5.241	174.759		4.699	175.301		5.673	174.327		3.626	176.374		3.319	176.681		3.593	176.407		1.848	178.152		3.645	176.355		0.797	179.203		4.074	175.926		3.907	176.093		10.305	169.695			175.855	15
	3	11.512	168.488		4.802	175.198		9.335	170.665		18.519	161.481		9.765	170.235		8.593	171.407		4.834	175.166		4.51	175.49		5.363	174.637		5.921	174.079		3.645	176.355		3.205	176.795		4.074	175.926		6.183	173.817		10.305	169.695			172.629	15
	4	14.184	165.816		15.117	164.883		13.165	166.835		28.61	151.39		35.568	144.432		18.91	161.09		4.834	175.166		106.504	73.496		5.363	174.637		5.921	174.079		29.872	150.128		38.355	141.645		6.515	173.485		20.914	159.086		9.924	170.076			156.416	15
	5	21.953	158.047		25.652	154.348		13.165	166.835		42.647	137.353		101.1	78.9		84.249	95.751		24.206	155.794		152.319	27.681		13.585	166.415		70.806	109.194		70.295	109.705		92.887	87.113		6.515	173.485		43.822	136.178		29.192	150.808			127.174	15
	6	49.552	130.448		24.495	155.505		48.836	131.164		42.647	137.353		101.1	78.9		90.476	89.524		81.482	98.518		158.839	21.161		24.075	155.925		91.428	88.572		81.404	98.596		123.88	56.12		19.2	160.8		60.524	119.476		29.192	150.808			111.525	15
	7	64.281	115.719		24.495	155.505		71.533	108.467		59.123	120.877		103.726	76.274		141.705	38.295		108.435	71.565		158.839	21.161		30.158	149.842		106.735	73.265		96.818	83.182		138.614	41.386		33.495	146.505		71.702	108.298		29.932	150.068			97.3606	15
	8	96.189	83.811		38.532	141.468		121.654	58.346		88.091	91.909		115.432	64.568		165.964	14.036		130.214	49.786		175.4	4.6		60.945	119.055		121.21	58.79		112.834	67.166		143.616	36.384		69.162	110.838		81.048	98.952		56.61	123.39			74.8733	15
	9	99.819	80.181		38.532	141.468		125.538	54.462		111.801	68.199		115.611	64.389		153.435	26.565		143.249	36.751		173.779	6.221		69.465	110.535		146.31	33.69		136.014	43.986		143.616	36.384		100.061	79.939		112.268	67.732		86.532	93.468			62.9313	15
	10	99.819	80.181		47.521	132.479		139.802	40.198		135	45		115.611	64.389		166.121	13.879		141.953	38.047		154.142	25.858		84.56	95.44		168.135	11.865		137.121	42.879		141.762	38.238		168.896	11.104		130.726	49.274		147.55	32.45			48.0854	15
	11	109.477	70.523		47.521	132.479		123.93	56.07		135	45		131.263	48.737		177.203	2.797		141.953	38.047		159.852	20.148		121.088	58.912		168.135	11.865		118.918	61.082		141.762	38.238		168.896	11.104		150.54	29.46		164.364	15.636			42.6732	15
	12	124.597	55.403		51.126	128.874		123.93	56.07		155.821	24.179		146.229	33.771		177.203	2.797		172.163	7.837		158.009	21.991		135.522	44.478		178.21	1.79		135	45		148.219	31.781		178.152	1.848		150.54	29.46		164.364	15.636			33.3943	15
	13	124.597	55.403		51.126	128.874		133.866	46.134		155.821	24.179		157.188	22.812		164.262	15.738		175.29	4.71		159.075	20.925		133.161	46.839		171.392	8.608		133.025	46.975		160.436	19.564		178.152	1.848		175.329	4.671		161.509	18.491			31.0514	15
	14	135.187	44.813		79.363	100.637		133.866	46.134		155.821	24.179		157.188	22.812		161.075	18.925		173.561	6.439		178.091	1.909		141.843	38.157		167.661	12.339		151.858	28.142		167.648	12.352		161.565	18.435		172.655	7.345		169.667	10.333			26.1967	15
	15	134.566	45.434		83.48	96.52		144.335	35.665		168.69	11.31		174.596	5.404		161.075	18.925		169.274	10.726		178.091	1.909		145.62	34.38		168.69	11.31		151.858	28.142		172.917	7.083		166.759	13.241		172.655	7.345		176.634	3.366			22.0507	15
	16	134.566	45.434		164.745	15.255		144.335	35.665		160.787	19.213		178.353	1.647		159.435	20.565		173.027	6.973		179.117	0.883		149.226	30.774		168.69	11.31		151.858	28.142		172.917	7.083		164.745	15.255		175.798	4.202		177.691	2.309			16.314	15
	17	139.399	40.601		164.745	15.255		144.335	35.665		176.035	3.965		178.353	1.647		159.435	20.565		174.32	5.68		179.117	0.883		153.765	26.235		162.464	17.536		165.486	14.514		172.377	7.623		163.142	16.858		168.207	11.793		177.691	2.309			14.7419	15
	18	139.399	40.601		159.806	20.194		148.278	31.722		176.035	3.965		165.964	14.036		168.411	11.589		174.32	5.68		179.525	0.475		153.765	26.235		169.001	10.999		165.486	14.514		172.377	7.623		165.964	14.036		168.207	11.793		168.087	11.913			15.025	15
	19	148.031	31.969		167.949	12.051		159.465	20.535		176.035	3.965		172.482	7.518		168.411	11.589		167.16	12.84		168.461	11.539		151.054	28.946		169.001	10.999		162.232	17.768		170.286	9.714		165.964	14.036		173.845	6.155		168.461	11.539			14.0775	15
	20	148.031	31.969		167.949	12.051		159.465	20.535		176.035	3.965		172.482	7.518		168.411	11.589		178.817	1.183		172.614	7.386		167.948	12.052		169.001	10.999		166.264	13.736		170.286	9.714		176.837	3.163		172.158	7.842		179.284	0.716			10.2945	15
	21	157.061	22.939		169.715	10.285		174.759	5.241		173.915	6.085		172.482	7.518		162.121	17.879		178.817	1.183		172.614	7.386		159.794	20.206		166.809	13.191		178.801	1.199		170.286	9.714		176.055	3.945		171.263	8.737		179.284	0.716			9.0816	15
	22	152.103	27.897		170.735	9.265		174.759	5.241		173.915	6.085		171.133	8.867		170.508	9.492		171.486	8.514		177.026	2.974		168.175	11.825		160.346	19.654		178.801	1.199		170.286	9.714		176.055	3.945		171.263	8.737		179.284	0.716			8.94167	15
	23	163.626	16.374		170.735	9.265		173.215	6.785		173.915	6.085		176.07	3.93		170.508	9.492		171.486	8.514		177.026	2.974		165.398	14.602		160.346	19.654		176.796	3.204		174.094	5.906		176.055	3.945		171.263	8.737		179.284	0.716			8.0122	15
	24	155.989	24.011		165.828	14.172		173.215	6.785		179.848	0.152		172.248	7.752		170.508	9.492		175.191	4.809		177.605	2.395		170.486	9.514		176.694	3.306		176.796	3.204		174.094	5.906		179.356	0.644		171.263	8.737		179.284	0.716			6.773	15
	25	160.218	19.782		165.828	14.172		176.557	3.443		179.848	0.152		178.334	1.666		170.134	9.866		175.191	4.809		174.062	5.938		167.039	12.961		176.694	3.306		177.274	2.726		172.875	7.125		178.397	1.603		173.137	6.863		179.284	0.716			6.34187	15
	26	166.608	13.392		176.424	3.576		176.557	3.443		179.848	0.152		178.334	1.666		170.134	9.866		175.135	4.865		174.382	5.618		172.818	7.182		178.995	1.005		177.274	2.726		172.875	7.125		178.397	1.603		173.137	6.863		179.284	0.716			4.6532	15
	27	166.608	13.392		170.642	9.358		174.005	5.995		179.848	0.152		176.832	3.168		169.188	10.812		175.135	4.865		178.781	1.219		169.234	10.766		178.995	1.005		178.998	1.002		166.208	13.792		172.168	7.832		170.407	9.593		179.284	0.716			6.24447	15
	28	178.739	1.261		170.642	9.358		174.005	5.995		179.848	0.152		173.44	6.56		169.188	10.812		177.207	2.793		178.781	1.219		173.871	6.129		177.117	2.883		178.998	1.002		162.917	17.083		177.629	2.371		170.407	9.593		168.04	11.96			5.94473	15
	29	178.739	1.261		165.129	14.871		172.381	7.619		175.301	4.699		173.44	6.56		173.921	6.079		177.207	2.793		175.167	4.833		173.871	6.129		177.117	2.883		178.998	1.002		162.917	17.083		177.629	2.371		170.407	9.593		174.144	5.856			6.24213	15
	30	178.739	1.261		165.129	14.871		172.381	7.619		175.301	4.699		173.44	6.56		173.921	6.079		177.928	2.072		179.635	0.365		173.871	6.129		177.117	2.883		178.998	1.002		163.626	16.374		177.629	2.371		170.407	9.593		174.144	5.856			5.84893	15
	line	35S FUL
	treatment
only 6 seedlings germinated		1	1comp		2	2comp		3	3comp		4	4comp		5	5comp		6	6comp		7	7comp		8	8comp		9	9comp		10	10comp		11	11comp		12	12comp		13	13comp		14	14comp		15	15comp			average	n
	1	5.806	174.194		3.759	176.241		1.848	178.152		3.398	176.602		2.99	177.01		3.359	176.641																														176.473	6
	2	5.806	174.194		3.759	176.241		1.848	178.152		5.819	174.181		3.576	176.424		3.359	176.641																														175.972	6
	3	11.976	168.024		13.645	166.355		8.979	171.021		5.819	174.181		3.576	176.424		3.795	176.205																														172.035	6
	4	11.976	168.024		13.645	166.355		13.899	166.101		13.94	166.06		3.576	176.424		3.652	176.348																														169.885	6
	5	11.976	168.024		29.453	150.547		13.899	166.101		13.94	166.06		3.569	176.431		16.507	163.493																														165.109	6
	6	30.366	149.634		139.219	40.781		14.39	165.61		13.94	166.06		3.569	176.431		22.731	157.269																														142.631	6
	7	30.366	149.634		151.757	28.243		14.39	165.61		19.086	160.914		44.877	135.123		27.951	152.049																														131.929	6
	8	33.141	146.859		157.27	22.73		17.653	162.347		39.756	140.244		65.616	114.384		36.674	143.326																														121.648	6
	9	33.141	146.859		161.255	18.745		22.466	157.534		94.764	85.236		87.729	92.271		58.024	121.976																														103.77	6
	10	35.386	144.614		158.698	21.302		30.373	149.627		172.451	7.549		115.034	64.966		80.531	99.469																														81.2545	6
	11	35.386	144.614		158.698	21.302		44.639	135.361		177.397	2.603		147.645	32.355		98.583	81.417																														69.6087	6
	12	40.839	139.161		180	0		47.429	132.571		177.397	2.603		148.294	31.706		98.583	81.417																														64.5763	6
	13	40.839	139.161		169.604	10.396		47.429	132.571		177.397	2.603		154.883	25.117		130.314	49.686																														59.9223	6
	14	53.256	126.744		163.301	16.699		52.922	127.078		174.677	5.323		158.897	21.103		137.997	42.003																														56.4917	6
	15	51.566	128.434		174.289	5.711		51.826	128.174		174.677	5.323		167.394	12.606		146.836	33.164																														52.2353	6
	16	74.055	105.945		177.955	2.045		74.505	105.495		176.39	3.61		169.761	10.239		146.836	33.164																														43.4163	6
	17	97.737	82.263		177.955	2.045		100.387	79.613		176.39	3.61		169.761	10.239		154.44	25.56																														33.8883	6
	18	142.765	37.235		177.797	2.203		117.379	62.621		176.39	3.61		169.761	10.239		155.861	24.139																														23.3412	6
	19	146.31	33.69		177.797	2.203		129.393	50.607		176.538	3.462		169.761	10.239		161.632	18.368																														19.7615	6
	20	160.56	19.44		177.614	2.386		129.393	50.607		176.538	3.462		169.761	10.239		161.632	18.368																														17.417	6
	21	163.413	16.587		177.614	2.386		149.449	30.551		176.538	3.462		169.761	10.239		161.075	18.925																														13.6917	6
	22	163.413	16.587		177.614	2.386		149.449	30.551		176.538	3.462		161.061	18.939		172.666	7.334																														13.2098	6
	23	158.647	21.353		176.61	3.39		163.374	16.626		176.538	3.462		161.061	18.939		172.666	7.334																														11.8507	6
	24	166.866	13.134		176.61	3.39		172.875	7.125		174.35	5.65		167.706	12.294		178.746	1.254																														7.14117	6
	25	172.875	7.125		172.421	7.579		172.875	7.125		169.867	10.133		167.706	12.294		178.746	1.254																														7.585	6
	26	172.875	7.125		175.03	4.97		178.951	1.049		161.445	18.555		167.706	12.294		178.113	1.887																														7.64667	6
	27	154.756	25.244		175.03	4.97		178.951	1.049		169.38	10.62		167.774	12.226		178.325	1.675																														9.29733	6
	28	154.39	25.61		173.157	6.843		178.951	1.049		167.574	12.426		167.774	12.226		178.325	1.675																														9.9715	6
	29	154.39	25.61		173.394	6.606		178.951	1.049		167.574	12.426		170.138	9.862		178.325	1.675																														9.538	6
	30	154.39	25.61		176.89	3.11		178.951	1.049		167.574	12.426		170.138	9.862		178.325	1.675																														8.95533	6
[truncated: 2 more columns]

## Sheet: Figure 4E
2 days old seedlings
20180830
		line	WT 2DAG
		treatment	mock
			1	1comp		2	2comp		3	3comp		4	4comp		5	5comp		6	6comp		7	7comp		8	8comp		9	9comp		10	10comp		11	11comp		12	12comp		13	13comp		14	14comp		15	15comp			average
		1	40.236	139.764		6.736	173.264		0.76	179.24		0	180		0	180		1.102	178.898		43.363	136.637		1.023	178.977		0	180		0.082	179.918		5.376	174.624		0	180		1.967	178.033		10.19	169.81						172.083
		2	26.127	153.873		0	180		0	180		0	180		0	180		0	180		43.363	136.637		1.023	178.977		0	180		0.082	179.918		6.236	173.764		0	180		1.967	178.033		10.19	169.81						173.644
		3	1.397	178.603		1.946	178.054		0	180		0	180		0	180		0	180		43.363	136.637		0	180		0	180		0	180		10.396	169.604		0	180		1.967	178.033		0	180						175.781
		4	0	180		0	180		0	180		0	180		0	180		0	180		0	180		0	180		0	180		0	180		12.179	167.821		0	180		1.967	178.033		0	180						178.99
		5	0.512	179.488		0	180		0	180		0	180		24.444	155.556		0	180		0	180		0	180		0	180		0	180		0	180		0	180		1.967	178.033		0	180						178.077
		6	0.927	179.073		0	180		0	180		0	180		24.775	155.225		0	180		0	180		0	180		0	180		0	180		0	180		0	180		1.967	178.033		0	180						178.024
		7	1.425	178.575		0	180		0	180		1.364	178.636		40.469	139.531		0	180		0	180		0	180		0	180		0	180		0	180		0	180		0	180		0	180						176.91
		8	13.496	166.504		0	180		0	180		1.364	178.636		33.503	146.497		0	180		0	180		26.937	153.063		0	180		0	180		0	180		0	180		0	180		0	180						174.621
		9	15.686	164.314		0	180		0	180		1.364	178.636		37.41	142.59		0	180		0	180		26.937	153.063		0	180		0	180		0	180		0	180		0	180		0	180						174.186
		10	19.179	160.821		0	180		0	180		1.364	178.636		22.38	157.62		58.392	121.608		0	180		26.937	153.063		0	180		0	180		0	180		0	180		0	180		28.61	151.39						168.796
		11	36.384	143.616		0	180		0	180		1.364	178.636		32.276	147.724		65.556	114.444		0	180		26.937	153.063		16.091	163.909		0	180		0	180		0	180		0	180		35.983	144.017						164.672
		12	49.399	130.601		0	180		0	180		1.364	178.636		81.293	98.707		69.624	110.376		33.986	146.014		21.677	158.323		52.409	127.591		0	180		27.89	152.11		0	180		0	180		43.329	136.671						152.788
		13	65.017	114.983		0	180		0	180		22.422	157.578		104.216	75.784		70.994	109.006		58.001	121.999		21.677	158.323		70.615	109.385		0	180		27.89	152.11		0	180		0	180		71.761	108.239						143.386
		14	64.299	115.701		16.147	163.853		0	180		22.422	157.578		119.982	60.018		104.036	75.964		72.415	107.585		29.562	150.438		92.829	87.171		0	180		23.004	156.996		20.605	159.395		0	180		65.792	114.208						134.922
		15	72.019	107.981		25.288	154.712		0	180		40.122	139.878		142.465	37.535		119.982	60.018		94.83	85.17		28.907	151.093		98.545	81.455		0	180		23.004	156.996		20.605	159.395		0	180		97.227	82.773						125.5
		16	73.1	106.9		55.67	124.33		0	180		47.862	132.138		148.385	31.615		121.621	58.379		122.252	57.748		65.087	114.913		124.787	55.213		0	180		36.485	143.515		53.584	126.416		35.966	144.034		134.534	45.466						107.191
		17	65.174	114.826		58.241	121.759		37.249	142.751		62.581	117.419		150.018	29.982		119.626	60.374		132.089	47.911		72.499	107.501		111.801	68.199		29.263	150.737		43.152	136.848		53.584	126.416		65.854	114.146		153.435	26.565						97.531
		18	69.053	110.947		101.066	78.934		104.967	75.033		103.835	76.165		177.247	2.753		136.245	43.755		131.771	48.229		151.6	28.4		133.452	46.548		90	90		43.152	136.848		53.584	126.416		107.301	72.699		176.983	3.017						67.1246
		19	86.055	93.945		107.316	72.684		115.911	64.089		133.39	46.61		180	0		132.346	47.654		114.228	65.772		151.41	28.59		152.241	27.759		131.849	48.151		78.818	101.182		137.261	42.739		136.219	43.781		179.621	0.379						48.8096
		20	165.543	14.457		147.829	32.171		154.819	25.181		178.315	1.685		180	0		138.768	41.232		130.236	49.764		178.261	1.739		177.694	2.306		149.274	30.726		78.818	101.182		137.261	42.739		161.115	18.885		180	0						25.8619
		21	173.937	6.063		172.342	7.658		177.363	2.637		178.823	1.177		180	0		162.642	17.358		147.106	32.894		180	0		180	0		175.121	4.879		125.424	54.576		168.391	11.609		180	0		180	0						9.91793
		22	176.108	3.892		172.829	7.171		180	0		180	0		180	0		165.199	14.801		180	0		180	0		180	0		180	0		145.192	34.808		173.818	6.182		180	0		180	0						4.77529
		23	180	0		176.634	3.366		180	0		180	0		180	0		178.698	1.302		180	0		180	0		180	0		180	0		173.418	6.582		179.108	0.892		180	0		180	0						0.867286
		24	180	0		180	0		180	0		180	0		180	0		180	0		180	0		180	0		180	0		180	0		176.414	3.586		180	0		180	0		180	0						0.256143
		25																																															#DIV/0!
		26																																															#DIV/0!
		27																																															#DIV/0!
		28																																															#DIV/0!
		29																																															#DIV/0!
		30																																															#DIV/0!
		line	35S:SAUR10 2DAG
		treatment	mock																																														35S:SAUR10 2DAG DMSO
			1	1comp		2	2comp		3	3comp		4	4comp		5	5comp		6	6comp		7	7comp		8	8comp		9	9comp		10	10comp		11	11comp		12	12comp		13	13comp		14	14comp		15	15comp			average
		1	55.133	124.867		38.618	141.382		41.216	138.784		0	180		39.24	140.76		25.85	154.15		62.768	117.232		23.078	156.922		49.203	130.797		33.99	146.01		42.33	137.67		34.472	145.528		28.544	151.456		40.093	139.907						143.248
		2	55.133	124.867		51.079	128.921		41.216	138.784		0	180		46.146	133.854		25.85	154.15		62.768	117.232		23.078	156.922		49.203	130.797		43.639	136.361		42.33	137.67		34.472	145.528		19.747	160.253		31.502	148.498						142.417
		3	55.133	124.867		51.079	128.921		45	135		0	180		46.146	133.854		25.85	154.15		62.768	117.232		23.078	156.922		49.203	130.797		44.095	135.905		53.13	126.87		40.824	139.176		30.701	149.299		31.502	148.498						140.107
		4	73.544	106.456		59.651	120.349		45	135		26.169	153.831		46.146	133.854		39.289	140.711		56.785	123.215		34.955	145.045		70.554	109.446		46.869	133.131		53.238	126.762		36.741	143.259		25.925	154.075		38.565	141.435						133.326
		5	80.134	99.866		59.651	120.349		57.738	122.262		31.942	148.058		69.444	110.556		44.215	135.785		82.113	97.887		45.874	134.126		93.975	86.025		61.52	118.48		65.689	114.311		52.496	127.504		34.24	145.76		35.283	144.717						121.835
		6	95.194	84.806		59.651	120.349		82.221	97.779		74.923	105.077		92.268	87.732		64.885	115.115		82.113	97.887		49.38	130.62		114.902	65.098		68.268	111.732		65.689	114.311		70.346	109.654		75.385	104.615		35.283	144.717						106.392
		7	102.787	77.213		90	90		98.855	81.145		109.026	70.974		113.801	66.199		103.195	76.805		77.354	102.646		70.385	109.615		131.908	48.092		94.69	85.31		61.94	118.06		69.437	110.563		107.819	72.181		64.195	115.805						87.472
		8	120.499	59.501		108.435	71.565		104.38	75.62		147.095	32.905		130.08	49.92		106.586	73.414		111.595	68.405		75.069	104.931		140.032	39.968		100.712	79.288		84.289	95.711		75.851	104.149		129.174	50.826		74.416	105.584						72.2705
		9	139.457	40.543		126.577	53.423		112.308	67.692		133.379	46.621		135.458	44.542		123.665	56.335		126.281	53.719		108.97	71.03		167.58	12.42		136.088	43.912		84.289	95.711		74.163	105.837		137.522	42.478		105.173	74.827						57.7921
		10	140.794	39.206		134.011	45.989		129.257	50.743		148.431	31.569		142.23	37.77		176.736	3.264		151.361	28.639		111.161	68.839		179.832	0.168		147.244	32.756		94.165	85.835		87.793	92.207		164.74	15.26		114.624	65.376						42.6872
		11	144.714	35.286		133.493	46.507		147.242	32.758		148.705	31.295		152.592	27.408		176.724	3.276		172.281	7.719		139.213	40.787		180	0		162.408	17.592		81.376	98.624		90.096	89.904		157.264	22.736		154.799	25.201						34.2209
		12	164.932	15.068		152.501	27.499		170.299	9.701		149.534	30.466		166.759	13.241		180	0		176.634	3.366		154.087	25.913		180	0		172.443	7.557		102.254	77.746		121.674	58.326		178.68	1.32		179.387	0.613						19.344
		13	174.531	5.469		170.811	9.189		180	0		177.574	2.426		179.256	0.744		180	0		180	0		166.201	13.799		180	0		176.419	3.581		102.483	77.517		135.986	44.014		180	0		180	0						11.1956
		14	169.578	10.422		176.634	3.366		180	0		180	0		180	0		180	0		180	0		177.368	2.632		180	0		180	0		129.001	50.999		164.871	15.129		180	0		180	0						5.89629
		15	179.607	0.393		177.413	2.587		180	0		180	0		180	0		180	0		180	0		180	0		180	0		180	0		180	0		179.904	0.096		180	0		180	0						0.219714
		16	180	0		180	0		180	0		180	0		180	0		180	0		180	0		180	0		180	0		180	0		180	0		180	0		180	0		180	0						0
		17	180	0		180	0		180	0		180	0		180	0		180	0		180	0		180	0		180	0		180	0		180	0		180	0		180	0		180	0						0
		18	180	0		180	0		180	0		180	0		180	0		180	0		180	0		180	0		180	0		180	0		180	0		180	0		180	0		180	0						0
		19	180	0		180	0		180	0		180	0		180	0		180	0		180	0		180	0		180	0		180	0		180	0		180	0		180	0		180	0						0
		20	180	0		180	0		180	0		180	0		180	0		180	0		180	0		180	0		180	0		180	0		180	0		180	0		180	0		180	0						0
		21	180	0		180	0		180	0		180	0		180	0		180	0		180	0		180	0		180	0		180	0		180	0		180	0		180	0		180	0						0
		22	180	0		180	0		180	0		180	0		180	0		180	0		180	0		180	0		180	0		180	0		180	0		180	0		180	0		180	0						0
		23	180	0		180	0		180	0		180	0		180	0		180	0		180	0		180	0		180	0		180	0		180	0		180	0		180	0		180	0						0
		24	180	0		180	0		180	0		180	0		180	0		180	0		180	0		180	0		180	0		180	0		180	0		180	0		180	0		180	0						0
		25																																															#DIV/0!
		26																																															#DIV/0!
		27																																															#DIV/0!
		28																																															#DIV/0!
		29																																															#DIV/0!
		30																																															#DIV/0!
20180816
		line	WT 2 DAG
		treatment	DMSO																																														WT 2DAG 500 nM DMSO
			1	1comp		2	2comp		3	3comp		4	4comp		5	5comp		6	6comp		7	7comp		8	8comp		9	9comp		10	10comp		11	11comp		12	12comp		13	13comp		14	14comp		15	15comp			average
		1	0	180		0	180		15.368	164.632		49.138	130.862		18.61	161.39		0.394	179.606		0.189	179.811		0	180		20.925	159.075		16.334	163.666		0.399	179.601		58.48	121.52		58.686	121.314		1.839	178.161						162.831
		2	0	180		0	180		15.368	164.632		49.138	130.862		55.507	124.493		0.394	179.606		0.189	179.811		0	180		20.925	159.075		16.334	163.666		0.399	179.601		83.914	96.086		37.666	142.334		1.839	178.161						159.881
		3	0	180		0	180		15.368	164.632		38.845	141.155		55.507	124.493		0.394	179.606		15.255	164.745		0	180		0.719	179.281		0.145	179.855		0.399	179.601		83.914	96.086		52.227	127.773		1.839	178.161						161.099
		4	0	180		0	180		12.398	167.602		31.394	148.606		55.507	124.493		9.733	170.267		2.131	177.869		0	180		0.719	179.281		1.342	178.658		0	180		69.501	110.499		39.992	140.008		0	180						164.092
		5	0	180		0	180		10.201	169.799		26.077	153.923		1.909	178.091		8.852	171.148		1.505	178.495		4.75	175.25		0.719	179.281		1.342	178.658		0	180		53.707	126.293		39.992	140.008		0	180						169.353
		6	0	180		0.597	179.403		0.19	179.81		6.911	173.089		1.909	178.091		0	180		0.585	179.415		4.75	175.25		0.511	179.489		1.155	178.845		0	180		60.573	119.427		16.309	163.691		0	180						173.322
		7	9.755	170.245		0.597	179.403		0.19	179.81		0.628	179.372		1.212	178.788		0	180		0.585	179.415		1.743	178.257		21.801	158.199		1.155	178.845		0	180		60.573	119.427		22.601	157.399		17.163	162.837						170.143
		8	9.755	170.245		2.718	177.282		0.19	179.81		1.169	178.831		36.87	143.13		0	180		0.585	179.415		1.014	178.986		29.827	150.173		1.716	178.284		1.123	178.877		38.66	141.34		39.787	140.213		17.163	162.837						167.102
		9	21.371	158.629		2.718	177.282		6.715	173.285		1.169	178.831		51.34	128.66		1.081	178.919		0.585	179.415		1.014	178.986		37.684	142.316		0.161	179.839		8.142	171.858		49.399	130.601		27.144	152.856		26.93	153.07						163.182
		10	47.49	132.51		1.38	178.62		18.985	161.015		1.138	178.862		49.044	130.956		1.081	178.919		0.585	179.415		1.815	178.185		35.999	144.001		13.134	166.866		8.504	171.496		45.324	134.676		27.144	152.856		16.686	163.314						160.835
		11	30.452	149.548		1.38	178.62		18.625	161.375		14.372	165.628		70.864	109.136		29.476	150.524		17.241	162.759		1.815	178.185		45	135		34.89	145.11		19.68	160.32		64.537	115.463		42.914	137.086		16.686	163.314						150.862
		12	138.366	41.634		19.277	160.723		1.063	178.937		154.335	25.665		64.832	115.168		52.64	127.36		17.241	162.759		14.919	165.081		48.24	131.76		47.603	132.397		27.378	152.622		83.346	96.654		42.914	137.086		16.686	163.314						127.94
		13	156.452	23.548		29.358	150.642		1.029	178.971		157.348	22.652		79.32	100.68		85.838	94.162		58.203	121.797		22.329	157.671		76.159	103.841		60.698	119.302		115.253	64.747		99.426	80.574		72.072	107.928		24.228	155.772						105.878
		14	142.001	37.999		62.477	117.523		0.848	179.152		175.941	4.059		88.122	91.878		66.253	113.747		72.242	107.758		59.495	120.505		79.112	100.888		79.38	100.62		111.678	68.322		118.74	61.26		86.867	93.133		27.853	152.147						96.3565
		15	145.15	34.85		81.729	98.271		14.84	165.16		178.127	1.873		99.386	80.614		124.992	55.008		78.111	101.889		87.199	92.801		88.868	91.132		119.055	60.945		127.304	52.696		142.125	37.875		115.089	64.911		27.853	152.147						77.8694
		16	149.629	30.371		130.236	49.764		66.989	113.011		177.518	2.482		117.031	62.969		109.902	70.098		78.111	101.889		129.144	50.856		113.957	66.043		100.467	79.533		127.079	52.921		152.819	27.181		151.809	28.191		25.991	154.009						63.5227
		17	158.515	21.485		154.523	25.477		131.424	48.576		180	0		134.847	45.153		140.404	39.596		99.208	80.792		149.89	30.11		137.386	42.614		134.735	45.265		144.172	35.828		176.675	3.325		150.495	29.505		55.528	124.472						40.8713
		18	174.037	5.963		164.516	15.484		145.076	34.924		180	0		131.46	48.54		157.709	22.291		116.301	63.699		161.565	18.435		151.974	28.026		151.46	28.54		153.435	26.565		180	0		179.568	0.432		68.649	111.351						28.875
		19	168.826	11.174		176.689	3.311		166.154	13.846		180	0		179.729	0.271		174.943	5.057		116.301	63.699		178.002	1.998		152.745	27.255		162.866	17.134		178.152	1.848		180	0		180	0		99.866	80.134						16.1234
		20	173.517	6.483		179.415	0.585		178.982	1.018		180	0		180	0		178.152	1.848		144.162	35.838		180	0		171.18	8.82		180	0		180	0		180	0		180	0		169.144	10.856						4.67486
		21	179.83	0.17		180	0		180	0		180	0		180	0		180	0		123.068	56.932		180	0		180	0		180	0		180	0		180	0		180	0		180	0						4.07871
		22	180	0		180	0		180	0		180	0		180	0		180	0		165.104	14.896		180	0		180	0		180	0		180	0		180	0		180	0		180	0						1.064
		23	180	0		180	0		180	0		180	0		180	0		180	0		177.017	2.983		180	0		180	0		180	0		180	0		180	0		180	0		180	0						0.213071
		24	180	0		180	0		180	0		180	0		180	0		180	0		180	0		180	0		180	0		180	0		180	0		180	0		180	0		180	0						0
		25																																															#DIV/0!
		26																																															#DIV/0!
		27																																															#DIV/0!
		28																																															#DIV/0!
		29																																															#DIV/0!
		30																																															#DIV/0!
		line	35S:SAUR10
		treatment	DMSO																																														35S:SAUR10 2DAG 500nM DMSO
			1	1comp		2	2comp		3	3comp		4	4comp		5	5comp		6	6comp		7	7comp		8	8comp		9	9comp		10	10comp		11	11comp		12	12comp		13	13comp		14	14comp		15	15comp			average
		1	40.601	139.399		26.565	153.435		23.304	156.696		29.327	150.673		17.354	162.646		27.486	152.514		45.741	134.259		22.054	157.946		26.39	153.61		36.838	143.162		55.613	124.387		50.015	129.985		36.649	143.351		0.567	179.433						148.678
		2	40.601	139.399		26.565	153.435		23.304	156.696		29.327	150.673		17.354	162.646		27.486	152.514		45.741	134.259		22.054	157.946		26.39	153.61		36.838	143.162		62.106	117.894		50.015	129.985		35.293	144.707		0.567	179.433						148.311
		3	58.338	121.662		15.09	164.91		18.415	161.585		29.327	150.673		18.573	161.427		15.445	164.555		48.047	131.953		22.054	157.946		25.005	154.995		44.602	135.398		60.354	119.646		26.67	153.33		35.293	144.707		0.567	179.433						150.159
		4	80.614	99.386		20.072	159.928		30.958	149.042		29.327	150.673		18.905	161.095		27.519	152.481		48.047	131.953		15.519	164.481		22.687	157.313		44.602	135.398		60.782	119.218		39.478	140.522		32.905	147.095		0.538	179.462						146.289
		5	80.614	99.386		22.178	157.822		61.55	118.45		42.909	137.091		18.663	161.337		27.519	152.481		64.44	115.56		24.905	155.095		22.537	157.463		44.602	135.398		59.098	120.902		39.478	140.522		30.273	149.727		0.538	179.462						141.478
		6	80.614	99.386		28.589	151.411		60.461	119.539		26.779	153.221		26.542	153.458		27.519	152.481		64.44	115.56		27.962	152.038		33.119	146.881		67.011	112.989		67.516	112.484		48.079	131.921		34.114	145.886		53.13	126.87						133.866
		7	80.614	99.386		28.588	151.412		54.224	125.776		47.609	132.391		42.026	137.974		38.027	141.973		88.152	91.848		34.397	145.603		36.355	143.645		94.759	85.241		81.588	98.412		49.564	130.436		37.594	142.406		88.671	91.329						122.702
		8	80.797	99.203		55.569	124.431		92.52	87.48		122.905	57.095		44.026	135.974		38.027	141.973		91.466	88.534		48.431	131.569		68.199	111.801		112.722	67.278		86.439	93.561		76.748	103.252		57.315	122.685		87.831	92.169						104.072
		9	118.028	61.972		65.225	114.775		107.103	72.897		171.173	8.827		57.381	122.619		79.33	100.67		93.553	86.447		83.66	96.34		71.018	108.982		134.388	45.612		80.067	99.933		90.962	89.038		98.05	81.95		90.885	89.115						84.2269
		10	136.951	43.049		58.53	121.47		118.951	61.049		140.517	39.483		56.158	123.842		79.33	100.67		116.383	63.617		101.295	78.705		70.002	109.998		175.033	4.967		90.605	89.395		100.039	79.961		119.458	60.542		84.13	95.87						76.6156
		11	150.255	29.745		72.953	107.047		116.099	63.901		129.001	50.999		83.377	96.623		88.15	91.85		131.935	48.065		153.745	26.255		88.392	91.608		176.218	3.782		91.759	88.241		142.607	37.393		178.995	1.005		94.388	85.612						58.7233
		12	153.516	26.484		99.931	80.069		146.258	33.742		130.167	49.833		106.343	73.657		113.423	66.577		169.131	10.869		176.16	3.84		114.687	65.313		179.7	0.3		122.582	57.418		177.539	2.461		180	0		109.508	70.492						38.6468
		13	160.533	19.467		139.26	40.74		138.336	41.664		157.521	22.479		127.036	52.964		121.955	58.045		180	0		177.989	2.011		130.781	49.219		180	0		136.74	43.26		180	0		180	0		115.627	64.373						28.1587
		14	167.222	12.778		175.764	4.236		179.863	0.137		157.521	22.479		133.603	46.397		130.396	49.604		180	0		180	0		148.647	31.353		180	0		168.951	11.049		180	0		180	0		175.063	4.937						13.0693
		15	178.363	1.637		180	0		180	0		178.452	1.548		176.962	3.038		150.471	29.529		180	0		180	0		167.471	12.529		180	0		179.749	0.251		180	0		180	0		179.844	0.156						3.47771
		16	180	0		180	0		180	0		180	0		179.249	0.751		178.056	1.944		180	0		180	0		174.204	5.796		180	0		180	0		180	0		180	0		180	0						0.6065
		17	180	0		180	0		180	0		180	0		180	0		180	0		180	0		180	0		179.246	0.754		180	0		180	0		180	0		180	0		180	0						0.0538571
		18	180	0		180	0		180	0		180	0		180	0		180	0		180	0		180	0		180	0		180	0		180	0		180	0		180	0		180	0						0
		19	180	0		180	0		180	0		180	0		180	0		180	0		180	0		180	0		180	0		180	0		180	0		180	0		180	0		180	0						0
		20	180	0		180	0		180	0		180	0		180	0		180	0		180	0		180	0		180	0		180	0		180	0		180	0		180	0		180	0						0
		21	180	0		180	0		180	0		180	0		180	0		180	0		180	0		180	0		180	0		180	0		180	0		180	0		180	0		180	0						0
		22	180	0		180	0		180	0		180	0		180	0		180	0		180	0		180	0		180	0		180	0		180	0		180	0		180	0		180	0						0
		23	180	0		180	0		180	0		180	0		180	0		180	0		180	0		180	0		180	0		180	0		180	0		180	0		180	0		180	0						0
		24	180	0		180	0		180	0		180	0		180	0		180	0		180	0		180	0		180	0		180	0		180	0		180	0		180	0		180	0						0
		25																																															#DIV/0!
		26																																															#DIV/0!
		27																																															#DIV/0!
		28																																															#DIV/0!
		29																																															#DIV/0!
		30																																															#DIV/0!
20180802
		line	WT
		treatment	DMSO																																														WT 2DAG DMSO
			1	1comp		2	2comp		3	3comp		4	4comp		5	5comp		6	6comp		7	7comp		8	8comp		9	9comp		10	10comp		11	11comp		12	12comp		13	13comp		14	14comp		15	15comp			average
		1	0	180		2.726	177.274		2.648	177.352		112.38	67.62		112.38	67.62		1.705	178.295		16.699	163.301		76.229	103.771		1.433	178.567		42.319	137.681		1.591	178.409		90.49	89.51		104.534	75.466		17.65	162.35						138.373
		2	0	180		2.726	177.274		2.648	177.352		112.38	67.62		112.38	67.62		1.705	178.295		16.699	163.301		76.229	103.771		1.433	178.567		42.319	137.681		1.219	178.781		82.569	97.431		104.534	75.466		17.65	162.35						138.965
		3	18.203	161.797		106.26	73.74		2.648	177.352		91.392	88.608		91.392	88.608		1.705	178.295		27.274	152.726		76.229	103.771		1.433	178.567		29.055	150.945		1.219	178.781		60.945	119.055		104.534	75.466		17.65	162.35						135.004
		4	32.171	147.829		106.26	73.74		1.941	178.059		91.392	88.608		91.392	88.608		126.87	53.13		27.274	152.726		76.229	103.771		35.467	144.533		29.055	150.945		1.023	178.977		61.709	118.291		104.534	75.466		9.219	170.781						123.247
		5	25.419	154.581		106.26	73.74		1.941	178.059		60.737	119.263		60.737	119.263		126.87	53.13		48.366	131.634		76.229	103.771		35.467	144.533		21.991	158.009		0.033	179.967		61.709	118.291		91.219	88.781		9.219	170.781						128.129
		6	15.22	164.78		62.192	117.808		0.148	179.852		60.737	119.263		60.737	119.263		126.87	53.13		90	90		70.56	109.44		76.098	103.902		1.282	178.718		0.924	179.076		29.456	150.544		91.219	88.781		1.432	178.568						130.938
		7	0.214	179.786		62.192	117.808		0.178	179.822		83.893	96.107		83.893	96.107		126.87	53.13		90	90		70.56	109.44		76.098	103.902		10.795	169.205		0	180		26.908	153.092		93.672	86.328		1.432	178.568						128.093
		8	1.883	178.117		50.389	129.611		21.047	158.953		83.893	96.107		83.893	96.107		98.326	81.674		114.305	65.695		26.875	153.125		45.922	134.078		10.795	169.205		0.864	179.136		0.932	179.068		65.152	114.848		0.024	179.976						136.836
		9	19.197	160.803		48.532	131.468		44.014	135.986		62.087	117.913		62.087	117.913		98.326	81.674		114.305	65.695		26.875	153.125		45.922	134.078		27.3	152.7		2.005	177.995		0.932	179.068		65.152	114.848		0.024	179.976						135.946
		10	19.197	160.803		48.532	131.468		56.505	123.495		62.087	117.913		62.087	117.913		107.195	72.805		121.977	58.023		3.013	176.987		45.922	134.078		27.3	152.7		21.801	158.199		0.921	179.079		65.152	114.848		0.204	179.796						134.15
		11	31.613	148.387		29.055	150.945		67.38	112.62		40.05	139.95		40.05	139.95		131.122	48.878		121.977	58.023		42.475	137.525		45.922	134.078		0.198	179.802		21.801	158.199		0.921	179.079		86.583	93.417		0.204	179.796						132.903
		12	31.613	148.387		29.055	150.945		67.38	112.62		40.05	139.95		40.05	139.95		141.242	38.758		121.977	58.023		42.475	137.525		65.638	114.362		22.102	157.898		19.393	160.607		0.921	179.079		86.583	93.417		0.204	179.796						129.38
		13	81.203	98.797		29.055	150.945		42.744	137.256		75.964	104.036		75.964	104.036		141.242	38.758		174.423	5.577		78.111	101.889		65.638	114.362		38.83	141.17		19.393	160.607		0.397	179.603		80.789	99.211		12.267	167.733						114.57
		14	81.203	98.797		55.156	124.844		42.744	137.256		75.964	104.036		75.964	104.036		130.016	49.984		178.685	1.315		91.38	88.62		75.379	104.621		60.404	119.596		45.297	134.703		4.181	175.819		110.521	69.479		12.267	167.733						105.774
		15	112.166	67.834		55.156	124.844		53.105	126.895		75.964	104.036		75.964	104.036		130.016	49.984		180	0		90.805	89.195		93.9	86.1		88.781	91.219		46.909	133.091		4.181	175.819		90.233	89.767		19.091	160.909						100.266
		16	112.166	67.834		55.156	124.844		96.659	83.341		75.964	104.036		75.964	104.036		131.076	48.924		180	0		116.245	63.755		101.736	78.264		93.221	86.779		87.496	92.504		54.814	125.186		106.75	73.25		57.006	122.994						83.9819
		17	119.055	60.945		94.133	85.867		96.659	83.341		112.426	67.574		112.426	67.574		167.609	12.391		180	0		132.551	47.449		119.422	60.578		114.085	65.915		102.96	77.04		114.805	65.195		95.69	84.31		107.879	72.121						60.7357
		18	141.81	38.19		94.133	85.867		132.649	47.351		112.426	67.574		112.426	67.574		178.668	1.332		180	0		156.371	23.629		145.856	34.144		109.678	70.322		131.998	48.002		140.006	39.994		95.69	84.31		134.705	45.295						46.6846
		19	137.074	42.926		123.96	56.04		130.539	49.461		112.426	67.574		112.426	67.574		180	0		180	0		178.531	1.469		179.877	0.123		118.571	61.429		165.945	14.055		155.788	24.212		132.924	47.076		178.363	1.637						30.9697
		20	141.009	38.991		146.31	33.69		171.54	8.46		112.815	67.185		112.815	67.185		180	0		180	0		180	0		180	0		118.571	61.429		177.526	2.474		175.659	4.341		132.51	47.49		180	0						23.6604
		21	170.906	9.094		165.801	14.199		178.995	1.005		112.815	67.185		112.815	67.185		180	0		180	0		180	0		180	0		118.571	61.429		180	0		180	0		155.596	24.404		180	0						17.4644
		22	178.631	1.369		176.39	3.61		180	0		178.213	1.787		178.213	1.787		180	0		180	0		180	0		180	0		178.69	1.31		180	0		180	0		178.781	1.219		180	0						0.791571
		23	180	0		179.855	0.145		180	0		180	0		180	0		180	0		180	0		180	0		180	0		180	0		180	0		180	0		180	0		180	0						0.0103571
		24	180	0		180	0		180	0		180	0		180	0		180	0		180	0		180	0		180	0		180	0		180	0		180	0		180	0		180	0						0
		25																																															#DIV/0!
		26																																															#DIV/0!
		27																																															#DIV/0!
		28																																															#DIV/0!
		29																																															#DIV/0!
		30																																															#DIV/0!
		line	35S:SAUR10
		treatment	DMSO																																														35S:SAUR10 2DAG DMSO
			1	1comp		2	2comp		3	3comp		4	4comp		5	5comp		6	6comp		7	7comp		8	8comp		9	9comp		10	10comp		11	11comp		12	12comp		13	13comp		14	14comp		15	15comp			average
		1	36.577	143.423		53.15	126.85		1.081	178.919		15.751	164.249		33.912	146.088		86.26	93.74		83.66	96.34		77.293	102.707		10.377	169.623		14.744	165.256		21.562	158.438		18.988	161.012		41.379	138.621		27.926	152.074		77.699	102.301			139.976
		2	36.577	143.423		53.15	126.85		1.081	178.919		14.413	165.587		65.363	114.637		64.29	115.71		66.501	113.499		77.293	102.707		22.521	157.479		23.199	156.801		21.562	158.438		18.988	161.012		41.379	138.621		27.926	152.074		62.548	117.452			140.214
		3	36.577	143.423		52.306	127.694		1.081	178.919		18.26	161.74		46.79	133.21		64.29	115.71		53.667	126.333		70.145	109.855		17.856	162.144		13.682	166.318		21.562	158.438		18.988	161.012		66.067	113.933		32.917	147.083		62.548	117.452			141.551
		4	35.608	144.392		52.334	127.666		1.196	178.804		31.703	148.297		85.25	94.75		63.435	116.565		65.216	114.784		70.145	109.855		29.917	150.083		23.61	156.39		30.251	149.749		29.765	150.235		66.067	113.933		37.211	142.789		34.486	145.514			136.254
		5	53.435	126.565		52.334	127.666		18.488	161.512		56.889	123.111		85.25	94.75		63.435	116.565		67.011	112.989		96.55	83.45		29.917	150.083		18.114	161.886		30.251	149.749		24.494	155.506		74.154	105.846		37.211	142.789		35.649	144.351			130.455
		6	77.127	102.873		55.305	124.695		52.765	127.235		55.542	124.458		123.22	56.78		63.435	116.565		90	90		144.568	35.432		29.917	150.083		26.316	153.684		54.895	125.105		24.494	155.506		74.154	105.846		28.146	151.854		62.233	117.767			115.859
		7	77.127	102.873		55.305	124.695		88.392	91.608		59.09	120.91		129.806	50.194		63.435	116.565		73.13	106.87		144.568	35.432		71.418	108.582		51.746	128.254		68.199	111.801		24.494	155.506		97.489	82.511		31.093	148.907		60.26	119.74			106.963
		8	98.957	81.043		60.21	119.79		85.219	94.781		68.199	111.801		155.634	24.366		103.736	76.264		100.68	79.32		176.195	3.805		78.286	101.714		51.18	128.82		68.199	111.801		69.528	110.472		97.489	82.511		48.149	131.851		56.001	123.999			92.1559
		9	98.957	81.043		60.21	119.79		76.99	103.01		83.146	96.854		177.589	2.411		103.736	76.264		121.277	58.723		179.145	0.855		118.36	61.64		64.047	115.953		86.055	93.945		98.625	81.375		125.401	54.599		62.7	117.3		86.505	93.495			77.1505
		10	119.694	60.306		101.296	78.704		86.736	93.264		83.324	96.676		180	0		125.112	54.888		136.578	43.422		180	0		144.705	35.295		64.047	115.953		86.055	93.945		126.228	53.772		136.965	43.035		62.7	117.3		122.005	57.995			62.9703
		11	119.694	60.306		168.179	11.821		73.85	106.15		83.324	96.676		180	0		149.636	30.364		131.234	48.766		180	0		174.257	5.743		58.738	121.262		108.435	71.565		128.089	51.911		148.451	31.549		97.125	82.875		146.31	33.69			50.1785
		12	142.407	37.593		166.32	13.68		139.824	40.176		83.324	96.676		180	0		149.636	30.364		150.908	29.092		180	0		179.166	0.834		69.55	110.45		177.641	2.359		149.395	30.605		148.432	31.568		97.125	82.875		179.869	0.131			33.7602
		13	159.677	20.323		177.149	2.851		159.833	20.167		119.982	60.018		180	0		175.986	4.014		167.157	12.843		180	0		180	0		69.55	110.45		180	0		164.442	15.558		148.333	31.667		154.894	25.106		180	0			20.1998
		14	180	0		180	0		177.894	2.106		149.72	30.28		180	0		179.86	0.14		178.255	1.745		180	0		180	0		77.347	102.653		180	0		175.242	4.758		149.657	30.343		176.34	3.66		180	0			11.7123
		15	180	0		180	0		180	0		179.246	0.754		180	0		180	0		180	0		180	0		180	0		178.822	1.178		180	0		177.145	2.855		179.324	0.676		179.82	0.18		180	0			0.3762
		16	180	0		180	0		180	0		180	0		180	0		180	0		180	0		180	0		180	0		180	0		180	0		180	0		180	0		180	0		180	0			0
		17	180	0		180	0		180	0		180	0		180	0		180	0		180	0		180	0		180	0		180	0		180	0		180	0		180	0		180	0		180	0			0
		18	180	0		180	0		180	0		180	0		180	0		180	0		180	0		180	0		180	0		180	0		180	0		180	0		180	0		180	0		180	0			0
		19	180	0		180	0		180	0		180	0		180	0		180	0		180	0		180	0		180	0		180	0		180	0		180	0		180	0		180	0		180	0			0
		20	180	0		180	0		180	0		180	0		180	0		180	0		180	0		180	0		180	0		180	0		180	0		180	0		180	0		180	0		180	0			0
		21	180	0		180	0		180	0		180	0		180	0		180	0		180	0		180	0		180	0		180	0		180	0		180	0		180	0		180	0		180	0			0
		22	180	0		180	0		180	0		180	0		180	0		180	0		180	0		180	0		180	0		180	0		180	0		180	0		180	0		180	0		180	0			0
		23	180	0		180	0		180	0		180	0		180	0		180	0		180	0		180	0		180	0		180	0		180	0		180	0		180	0		180	0		180	0			0
		24	180	0		180	0		180	0		180	0		180	0		180	0		180	0		180	0		180	0		180	0		180	0		180	0		180	0		180	0		180	0			0
		25																																															#DIV/0!
		26																																															#DIV/0!
		27																																															#DIV/0!
		28																																															#DIV/0!
		29																																															#DIV/0!
		30																																															#DIV/0!
20180801
		line	WT
		treatment	DMSO																																														WT 500 nM DMSO
			1	1comp		2	2comp		3	3comp		4	4comp		5	5comp		6	6comp		7	7comp		8	8comp		9	9comp		10	10comp		11	11comp		12	12comp		13	13comp		14	14comp		15	15comp			average
		1	111.615	68.385		114.362	65.638		72.219	107.781		105.285	74.715		50.906	129.094		32.31	147.69		9.349	170.651		10.341	169.659		0.298	179.702		0.677	179.323		6.041	173.959		1.507	178.493		0	180		0.895	179.105						143.157
		2	111.615	68.385		114.362	65.638		72.219	107.781		105.285	74.715		50.906	129.094		32.31	147.69		35.506	144.494		10.341	169.659		0.298	179.702		0.677	179.323		25.233	154.767		1.507	178.493		0	180		0.895	179.105						139.918
		3	111.615	68.385		82.573	97.427		38.326	141.674		109.633	70.367		3.262	176.738		38.541	141.459		56.066	123.934		0.204	179.796		0.298	179.702		0.677	179.323		35.175	144.825		1.507	178.493		1.975	178.025		25.425	154.575						143.909
		4	166.946	13.054		72.408	107.592		2.529	177.471		98.942	81.058		3.262	176.738		38.541	141.459		73.968	106.032		0	180		81.63	98.37		26.704	153.296		37.569	142.431		64.707	115.293		26.565	153.435		51.116	128.884						126.794
		5	133.452	46.548		72.408	107.592		1.114	178.886		76.535	103.465		3.262	176.738		37.661	142.339		77.133	102.867		24.178	155.822		90	90		109.853	70.147		37.569	142.431		22.439	157.561		29.932	150.068		40.746	139.254						125.98
		6	133.452	46.548		60.422	119.578		1.114	178.886		76.535	103.465		0.566	179.434		45.496	134.504		130.236	49.764		26.165	153.835		90	90		81.741	98.259		36.369	143.631		20.521	159.479		76.969	103.031		40.746	139.254						121.405
		7	149.744	30.256		55.62	124.38		1.114	178.886		60.255	119.745		0.566	179.434		60.721	119.279		30.324	149.676		21.701	158.299		92.185	87.815		81.741	98.259		46.975	133.025		20.344	159.656		76.969	103.031		0.516	179.484						130.088
		8	173.66	6.34		55.62	124.38		3.076	176.924		60.255	119.745		15.678	164.322		1.709	178.291		24.146	155.854		21.701	158.299		92.185	87.815		81.741	98.259		0.535	179.465		54.462	125.538		105.461	74.539		0.516	179.484						130.661
		9	173.66	6.34		44.042	135.958		18.132	161.868		68.009	111.991		15.678	164.322		1.709	178.291		79.522	100.478		14.355	165.645		92.185	87.815		71.778	108.222		59.323	120.677		72.196	107.804		132.547	47.453		0.516	179.484						119.739
		10	162.759	17.241		44.042	135.958		16.809	163.191		68.009	111.991		37.243	142.757		48.297	131.703		132.025	47.975		30.285	149.715		94.981	85.019		71.778	108.222		84.839	95.161		40.03	139.97		132.547	47.453		0.026	179.974						111.166
		11	155.036	24.964		38.367	141.633		28.007	151.993		68.009	111.991		30.861	149.139		114.089	65.911		81.787	98.213		40.764	139.236		76.195	103.805		71.778	108.222		76.727	103.273		30.604	149.396		83.725	96.275		0.026	179.974						116.002
		12	155.741	24.259		45	135		50.711	129.289		60.562	119.438		156.801	23.199		102.537	77.463		81.787	98.213		40.764	139.236		76.277	103.723		58.272	121.728		78.492	101.508		24.905	155.095		83.725	96.275		4.752	175.248						107.12
		13	139.185	40.815		45	135		53.531	126.469		60.562	119.438		179.592	0.408		100.917	79.083		103.496	76.504		39.19	140.81		90.329	89.671		29.442	150.558		80.372	99.628		23.328	156.672		81.041	98.959		9.757	170.243						106.018
		14	149.421	30.579		51.606	128.394		72.384	107.616		70.779	109.221		180	0		100.582	79.418		94.189	85.811		39.19	140.81		90.329	89.671		14.762	165.238		58.228	121.772		38.157	141.843		81.041	98.959		10.725	169.275						104.901
		15	135.693	44.307		28.525	151.475		109.731	70.269		89.397	90.603		180	0		127.635	52.365		104.036	75.964		42.063	137.937		95.121	84.879		17.051	162.949		59.672	120.328		70.652	109.348		97.284	82.716		13.624	166.376						96.394
		16	111.666	68.334		38.014	141.986		111.753	68.247		79.659	100.341		180	0		124.135	55.865		101.004	78.996		87.409	92.591		95.121	84.879		44.791	135.209		82.223	97.777		49.549	130.451		97.284	82.716		12.842	167.158						93.1821
		17	133.967	46.033		43.452	136.548		177.109	2.891		142.394	37.606		180	0		144.793	35.207		117.725	62.275		87.409	92.591		128.367	51.633		74.982	105.018		95.605	84.395		90.928	89.072		97.284	82.716		19.562	160.438						70.4588
		18	144.184	35.816		57.095	122.905		177.722	2.278		133.668	46.332		180	0		178.114	1.886		115.299	64.701		158.268	21.732		172.986	7.014		107.894	72.106		91.426	88.574		110.931	69.069		153.475	26.525		11.31	168.69						51.9734
		19	144.184	35.816		65.376	114.624		180	0		179.756	0.244		180	0		180	0		172.017	7.983		158.268	21.732		178.152	1.848		134.53	45.47		139.172	40.828		138.798	41.202		178.059	1.941		153.287	26.713						24.1715
		20	173.991	6.009		141.371	38.629		180	0		180	0		180	0		180	0		178.21	1.79		154.893	25.107		180	0		176.524	3.476		170.676	9.324		146.56	33.44		180	0		80.233	99.767						15.5387
		21	180	0		178.657	1.343		180	0		180	0		180	0		180	0		180	0		156.371	23.629		180	0		177.955	2.045		179.926	0.074		178.315	1.685		180	0		108.792	71.208						7.14171
		22	180	0		180	0		180	0		180	0		180	0		180	0		180	0		179.36	0.64		180	0		180	0		180	0		180	0		180	0		173.991	6.009						0.474929
		23	180	0		180	0		180	0		180	0		180	0		180	0		180	0		180	0		180	0		180	0		180	0		180	0		180	0		177.232	2.768						0.197714
		24	180	0		180	0		180	0		180	0		180	0		180	0		180	0		180	0		180	0		180	0		180	0		180	0		180	0		180	0						0
		25																																															#DIV/0!
		26																																															#DIV/0!
		27																																															#DIV/0!
		28																																															#DIV/0!
		29																																															#DIV/0!
		30																																															#DIV/0!
		line	35S:SAUR10
		treatment	DMSO																																														35S:SAUR10 500 nM DMSO
			1	1comp		2	2comp		3	3comp		4	4comp		5	5comp		6	6comp		7	7comp		8	8comp		9	9comp		10	10comp		11	11comp		12	12comp		13	13comp		14	14comp		15	15comp			average
		1	55.784	124.216		1.116	178.884		36.87	143.13		7.125	172.875		11.025	168.975		62.734	117.266		91.094	88.906		35.91	144.09		14.709	165.291		86.309	93.691		0.144	179.856		1.377	178.623		65.221	114.779		34.47	145.53						144.008
		2	55.784	124.216		1.116	178.884		41.572	138.428		8.009	171.991		18.973	161.027		62.734	117.266		120.658	59.342		35.91	144.09		14.709	165.291		86.309	93.691		0.144	179.856		1.377	178.623		65.221	114.779		34.47	145.53						140.93
		3	73.74	106.26		16.557	163.443		53.973	126.027		0.29	179.71		26.459	153.541		61.264	118.736		120.658	59.342		35.91	144.09		0.032	179.968		98.443	81.557		0	180		1.377	178.623		65.221	114.779		19.31	160.69						139.055
		4	45.37	134.63		16.557	163.443		52.849	127.151		0.531	179.469		26.459	153.541		86.673	93.327		121.486	58.514		35.91	144.09		0.032	179.968		136.501	43.499		108.127	71.873		23.435	156.565		81.634	98.366		30.816	149.184						125.259
		5	40.389	139.611		47.553	132.447		87.741	92.259		1.116	178.884		62.241	117.759		84.837	95.163		123.232	56.768		33.896	146.104		1.099	178.901		128.089	51.911		59.901	120.099		12.532	167.468		120.964	59.036		30.816	149.184						120.4
		6	41.138	138.862		65.809	114.191		125.673	54.327		1.116	178.884		68.784	111.216		89.687	90.313		126.308	53.692		22.489	157.511		14.3	165.7		173.551	6.449		53.58	126.42		17.18	162.82		142.595	37.405		50.663	129.337						109.081
		7	46.332	133.668		72.039	107.961		122.005	57.995		28.861	151.139		66.39	113.61		89.236	90.764		126.219	53.781		13.799	166.201		42.594	137.406		178.287	1.713		73.985	106.015		4.399	175.601		175.197	4.803		51.832	128.168						102.059
		8	26.761	153.239		123.111	56.889		125.48	54.52		33.551	146.449		66.39	113.61		102.653	77.347		135.473	44.527		27.636	152.364		66.088	113.912		180	0		61.119	118.881		23.917	156.083		179.23	0.77		54.638	125.362						93.8538
		9	30.51	149.49		176.708	3.292		131.717	48.283		33.551	146.449		66.39	113.61		102.653	77.347		135.71	44.29		27.636	152.364		131.055	48.945		180	0		73.158	106.842		21.326	158.674		180	0		84.195	95.805						81.8136
		10	32.152	147.848		180	0		143.306	36.694		33.551	146.449		133.21	46.79		121.736	58.264		148.134	31.866		27.636	152.364		161.193	18.807		180	0		109.834	70.166		38.63	141.37		180	0		63.467	116.533						69.0822
		11	58.799	121.201		180	0		143.306	36.694		41.82	138.18		133.21	46.79		121.736	58.264		166.919	13.081		73.04	106.96		150.709	29.291		180	0		152.832	27.168		83.884	96.116		180	0		119.279	60.721						52.4619
		12	58.799	121.201		180	0		180	0		46.142	133.858		133.21	46.79		145.085	34.915		178.121	1.879		102.407	77.593		178.156	1.844		180	0		162.423	17.577		122.759	57.241		180	0		117.895	62.105						39.6431
		13	179.684	0.316		180	0		180	0		61.202	118.798		178.102	1.898		152.934	27.066		180	0		107.754	72.246		180	0		180	0		172.504	7.496		180	0		180	0		160.583	19.417						17.6598
		14	180	0		180	0		180	0		123.085	56.915		180	0		173.796	6.204		180	0		115.858	64.142		180	0		180	0		179.894	0.106		180	0		180	0		164.847	15.153						10.18
		15	180	0		180	0		180	0		174.545	5.455		180	0		179.779	0.221		180	0		119.632	60.368		180	0		180	0		180	0		180	0		180	0		176.532	3.468						4.96514
		16	180	0		180	0		180	0		170.238	9.762		180	0		180	0		180	0		129.188	50.812		180	0		180	0		180	0		180	0		180	0		179.427	0.573						4.36764
		17	180	0		180	0		180	0		178.19	1.81		180	0		180	0		180	0		142.431	37.569		180	0		180	0		180	0		180	0		180	0		180	0						2.81279
		18	180	0		180	0		180	0		180	0		180	0		180	0		180	0		177.762	2.238		180	0		180	0		180	0		180	0		180	0		180	0						0.159857
		19	180	0		180	0		180	0		180	0		180	0		180	0		180	0		180	0		180	0		180	0		180	0		180	0		180	0		180	0						0
		20	180	0		180	0		180	0		180	0		180	0		180	0		180	0		180	0		180	0		180	0		180	0		180	0		180	0		180	0						0
		21	180	0		180	0		180	0		180	0		180	0		180	0		180	0		180	0		180	0		180	0		180	0		180	0		180	0		180	0						0
		22	180	0		180	0		180	0		180	0		180	0		180	0		180	0		180	0		180	0		180	0		180	0		180	0		180	0		180	0						0
		23	180	0		180	0		180	0		180	0		180	0		180	0		180	0		180	0		180	0		180	0		180	0		180	0		180	0		180	0						0
		24	180	0		180	0		180	0		180	0		180	0		180	0		180	0		180	0		180	0		180	0		180	0		180	0		180	0		180	0						0
		25																																															#DIV/0!
		26																																															#DIV/0!
		27																																															#DIV/0!
		28																																															#DIV/0!
		29																																															#DIV/0!
		30																																															#DIV/0!
[truncated: 4 more columns]

## Sheet: Supplemental Fig 1
Apical hook opening in the dark (w/o light stimulus)
WT versus 35S:GH3.5 (WES1_D)
Date: 2015.02.09
n=10 seedlings/line				Angle	complement			Angle	complement			Angle	complement			Angle	complement			Angle	complement			Angle	complement			Angle	complement			Angle	complement			Angle	complement			Angle	complement		Col-0-WT	average	stDEV	stERROR
	WT	12	1	98.596	81.404		1	103.039	76.961		1	112.62	67.38		1	86.455	93.545		1	105.945	74.055		1	111.318	68.682		1	111.801	68.199		1	82.057	97.943		1	80.362	99.638		1	115.178	64.822			79.2629	13.2882	4.20209
	mock	15	2	107.571	72.429		2	100.305	79.695		2	104.931	75.069		2	35.521	144.479		2	109.22	70.78		2	83.1	96.9		2	83.884	96.116		2	53.973	126.027		2	47.603	132.397		2	77.784	102.216			94.5174	21.4618	6.78681
		18	3	100.061	79.939		3	133.636	46.364		3	35.811	144.189		3	2.663	177.337		3	60.313	119.687		3	39.289	140.711		3	91.219	88.781		3	25.179	154.821		3	39.061	140.939		3	45	135			119.491	35.7281	11.2982
		21	4	34.875	145.125		4	22.143	157.857		4	37.224	142.776		4	0	180		4	28.393	151.607		4	44.37	135.63		4	39.161	140.839		4	0	180		4	0	180		4	22.62	157.38			156.855	16.8738	5.33598
		24	5	0	180		5	0	180		5	22.362	157.638		5	0	180		5	0	180		5	13.431	166.569		5	24.874	155.126		5	0	180		5	0	180		5	0	180			173.933	10.1714	3.21648
		27	6	0	180		6	0	180		6	0	180		6	0	180		6	0	180		6	0	180		6	0	180		6	0	180		6	0	180		6	0	180			180	0	0
		30	7	0	180		7	0	180		7	0	180		7	0	180		7	0	180		7	0	180		7	0	180		7	0	180		7	0	180		7	0	180			180	0	0
		33	8	0	180		8	0	180		8	0	180		8	0	180		8	0	180		8	0	180		8	0	180		8	0	180		8	0	180		8	0	180			180	0	0
		36	9	0	180		9	0	180		9	0	180		9	0	180		9	0	180		9	0	180		9	0	180		9	0	180		9	0	180		9	0	180			180	0	0
		39	10	0	180		10	0	180		10	0	180		10	0	180		10	0	180		10	0	180		10	0	180		10	0	180		10	0	180		10	0	180			180	0	0
		42	11	0	180		11	0	180		11	0	180		11	0	180		11	0	180		11	0	180		11	0	180		11	0	180		11	0	180		11	0	180			180	0	0
		45	12	0	180		12	0	180		12	0	180		12	0	180		12	0	180		12	0	180		12	0	180		12	0	180		12	0	180		12	0	180			180	0	0
		48	13	0	180		13	0	180		13	0	180		13	0	180		13	0	180		13	0	180		13	0	180		13	0	180		13	0	180		13	0	180			180	0	0
		51	14	0	180		14	0	180		14	0	180		14	0	180		14	0	180		14	0	180		14	0	180		14	0	180		14	0	180		14	0	180			180	0	0
		54	15	0	180		15	0	180		15	0	180		15	0	180		15	0	180		15	0	180		15	0	180		15	0	180		15	0	180		15	0	180			180	0	0
		57	16	0	180		16	0	180		16	0	180		16	0	180		16	0	180		16	0	180		16	0	180		16	0	180		16	0	180		16	0	180			180	0	0
		60	17	0	180		17	0	180		17	0	180		17	0	180		17	0	180		17	0	180		17	17.038	162.962		17	0	180		17	0	180		17	0	180			178.296	5.38789	1.7038
		63	18	0	180		18	0	180		18	45	135		18	25.139	154.861		18	0	180		18	0	180		18	29.038	150.962		18	0	180		18	0	180		18	0	180			172.596	16.0556	5.07723
		66	19	0	180		19	0	180		19	26.565	153.435		19	31.047	148.953		19	19.257	160.743		19	0	180		19	39.92	140.08		19	0	180		19	37.763	142.237		19	0	180			165.136	16.7287	5.29008
		69	20	0	180		20	42.51	137.49		20	31.088	148.912		20	58.285	121.715		20	27.753	152.247		20	57.065	122.935		20	43.091	136.909		20	41.892	138.108		20	47.195	132.805		20	85.236	94.764			139.312	21.8925	6.92303
		72	21	0	180		21	52.125	127.875		21	28.695	151.305		21	59.744	120.256		21	27.753	152.247		21	57.995	122.005		21	60.124	119.876		21	59.323	120.677		21	48.519	131.481		21	78.425	101.575			132.876	22.3676	7.07327
		75	22	0	180		22	59.438	120.562		22	43.374	136.626		22	58.97	121.03		22	31.629	148.371		22	43.418	136.582		22	94.627	85.373		22	67.961	112.039		22	41.987	138.013		22	118.625	61.375			123.92	33.0434	10.4492
		78	23	0	180		23	56.821	123.179		23	53.009	126.991		23	94.086	85.914		23	61.314	118.686		23	51.308	128.692		23	58.465	121.535		23	72.646	107.354		23	25.017	154.983		23	117.738	62.262			124.471	30.2897	9.57843
		81	24	0	180		24	64.111	115.889		24	45.172	134.828		24	102.304	77.696		24	32.574	147.426		24	63.112	116.888		24	62.725	117.275		24	70.408	109.592		24	46.975	133.025		24	109.179	70.821			121.166	30.6429	9.69013
		84	25	14.5	165.5		25	80.637	99.363		25	50.782	129.218		25	82.235	97.765		25	73.74	106.26		25	79.909	100.091		25	75.069	104.931		25	64.335	115.665		25	62.354	117.646		25	111.024	68.976			108.535	26.8663	8.49588
		87	26	45	135		26	73.713	106.287		26	75.228	104.772		26	108.558	71.442		26	57.529	122.471		26	95.528	84.472		26	95.549	84.451		26	72.11	107.89		26	64.09	115.91		26	91.219	88.781			104.78	16.643	5.26297
		90	27	109.335	70.665		27	68.674	111.326		27	65.118	114.882		27	107.021	72.979		27	76.264	103.736		27	103.861	76.139		27	98.218	81.782		27	75.424	104.576		27	67.249	112.751		27	84.65	95.35			94.2649	17.6927	5.59493
		93	28	106.011	73.989		28	105.197	74.803		28	77.848	102.152		28	116.625	63.375		28	84.03	95.97		28	97.845	82.155		28	118.072	61.928		28	85.14	94.86		28	65.65	114.35		28	100.739	79.261			85.2447	16.0404	5.07242
		96	29	116.779	63.221		29	104.036	75.964		29	80.389	99.611		29	123.805	56.195		29	92.63	87.37		29	98.968	81.032		29	126.87	53.13		29	80.049	99.951		29	78.947	101.053		29	123.608	56.392			78.1099	18.5564	5.86806
		99	30	103.408	76.592		30	84.378	95.622		30	89.084	90.916		30	126.17	53.83		30	97.125	82.875		30	79.261	100.739		30	156.326	23.674		30	94.454	85.546		30	94.764	85.236		30	125.311	54.689			75.2084	23.6214	7.46973
		102	31	108.623	71.377		31	90.4	89.6		31	88.636	91.364		31	125.287	54.713		31	112.101	67.899		31	90	90		31	118.496	61.504		31	102.529	77.471		31	91.981	88.019		31	121.952	58.048			74.9112	14.3863	4.54935
		105	32	108.435	71.565		32	107.103	72.897		32	99.936	80.064		32	129.665	50.335		32	99.462	80.538		32	81.169	98.831		32	127.495	52.505		32	90.258	89.742		32	90.616	89.384		32	120.568	59.432			74.9671	15.7219	4.97172
		108	33	94.764	85.236		33	94.086	85.914		33	92.576	87.424		33	126.794	53.206		33	79.951	100.049		33	83.743	96.257		33	120.52	59.48		33	95.528	84.472		33	98.616	81.384		33	120.568	59.432			78.9983	16.7324	5.29126
		111	34	104.879	75.121		34	114.274	65.726		34	99.236	80.764		34	128.776	51.224		34	97.09	82.91		34	78.421	101.579		34	136.076	43.924		34	84.697	95.303		34	96.71	83.29		34	135.403	44.597			72.642	20.2172	6.39325
		114	35	87.797	92.203		35	99.962	80.038		35	99.515	80.485		35	116.073	63.927		35	111.801	68.199		35	95.244	84.756		35	116.565	63.435		35	94.003	85.997		35	107.951	72.049		35	114.075	65.925			74.4311	12.4751	3.94497
		117	36	98.83	81.17		36	114.55	65.45		36	108.435	71.565		36	110.45	69.55		36	101.404	78.596		36	101.365	78.635		36	118.072	61.928		36	103.158	76.842		36	102.481	77.519		36	103.241	76.759			73.2391	7.01212	2.21743
		120	37	108.208	71.792		37	107.616	72.384		37	104.207	75.793		37	127.521	52.479		37	113.499	66.501		37	100.908	79.092		37	107.932	72.068		37	95.089	84.911		37	116.232	63.768		37	125.293	54.707			71.0566	8.33818	2.63677
		123	38	104.457	75.543		38	104.543	75.457		38	110.948	69.052		38	130.89	49.11		38	113.499	66.501		38	83.66	96.34		38	108.435	71.565		38	98.619	81.381		38	111.025	68.975		38	103.822	76.178			73.3471	11.2229	3.54901
		126	39	104.25	75.75		39	101.466	78.534		39	110.948	69.052		39	135.451	44.549		39	119.197	60.803		39	93.022	86.978		39	108.625	71.375		39	110.41	69.59		39	106.629	73.371		39	122.471	57.529			69.2092	10.9479	3.46204
		129	40	103.276	76.724		40	115.017	64.983		40	110.948	69.052		40	135.451	44.549		40	100.094	79.906		40	95.599	84.401		40	115.062	64.938		40	92.726	87.274		40	104.772	75.228		40	123.111	56.889			70.3944	13.1074	4.14493
		132	41	110.726	69.274		41	108.592	71.408		41	106.887	73.113		41	135.451	44.549		41	133.958	46.042		41	96.165	83.835		41	109.722	70.278		41	101.904	78.096		41	105.347	74.653		41	121.888	58.112			66.936	13.1659	4.16342
							42	108.435	71.565		42	110.283	69.717						42	126.773	53.227		42	103.431	76.569		42	103.729	76.271		42	99.462	80.538
																																											WES1_D	average	stDEV	stERROR
	WES1_D	12	1	78.896	101.104		1	140.711	39.289		1	131.186	48.814		1	118.686	61.314		1	110.225	69.775		1	87.117	92.883		1	111.801	68.199		1	130.815	49.185		1	117.979	62.021		1	110.956	69.044			66.1628	19.1846	6.06671
	Mock	15	2	84.229	95.771		2	146.31	33.69		2	131.634	48.366		2	114.829	65.171		2	76.629	103.371		2	93.434	86.566		2	124.939	55.061		2	116.25	63.75		2	81.158	98.842		2	93.366	86.634			73.7222	23.7912	7.52345
		18	3	18.916	161.084		3	49.942	130.058		3	99.989	80.011		3	95.244	84.756		3	47.526	132.474		3	64.654	115.346		3	81.539	98.461		3	19.767	160.233		3	36.87	143.13		3	92.261	87.739			119.329	30.6621	9.6962
		21	4	21.275	158.725		4	21.303	158.697		4	26.466	153.534		4	37.776	142.224		4	0.551	179.449		4	1.157	178.843		4	89.457	90.543		4	15.255	164.745		4	78.93	101.07		4	17.819	162.181			149.001	30.2011	9.55044
		24	5	2.726	177.274		5	1.266	178.734		5	1.931	178.069		5	1.219	178.781		5	0.551	179.449		5	1.157	178.843		5	85.684	94.316		5	0	180		5	33.69	146.31		5	0	180			167.178	27.5853	8.72322
		27	6	2.726	177.274		6	2.284	177.716		6	1.931	178.069		6	1.219	178.781		6	0.551	179.449		6	1.157	178.843		6	81.212	98.788		6	0	180		6	0	180		6	0	180			170.892	25.3538	8.01758
		30	7	2.074	177.926		7	2.284	177.716		7	1.931	178.069		7	1.219	178.781		7	0.551	179.449		7	1.157	178.843		7	45	135		7	0	180		7	0	180		7	0	180			174.578	13.9341	4.40636
		33	8	2.074	177.926		8	2.284	177.716		8	1.931	178.069		8	1.219	178.781		8	0.551	179.449		8	1.157	178.843		8	0	180		8	0	180		8	0	180		8	0	180			179.078	0.935809	0.295929
		36	9	2.074	177.926		9	2.284	177.716		9	1.931	178.069		9	1.219	178.781		9	0.551	179.449		9	1.157	178.843		9	0	180		9	0	180		9	0	180		9	0	180			179.078	0.935809	0.295929
		39	10	53.499	126.501		10	2.284	177.716		10	28.61	151.39		10	1.219	178.781		10	38.055	141.945		10	1.157	178.843		10	0	180		10	0	180		10	0	180		10	38.83	141.17			163.635	20.9931	6.63861
		42	11	59.49	120.51		11	2.284	177.716		11	32.164	147.836		11	22.62	157.38		11	50.906	129.094		11	81.563	98.437		11	0	180		11	0	180		11	0	180		11	114.305	65.695			143.667	39.7199	12.5605
		45	12	112.479	67.521		12	2.284	177.716		12	41.073	138.927		12	41.717	138.283		12	65.376	114.624		12	92.386	87.614		12	50.648	129.352		12	0	180		12	0	180		12	118.871	61.129			127.517	44.7756	14.1593
		48	13	116.565	63.435		13	37.875	142.125		13	52.73	127.27		13	47.726	132.274		13	120.551	59.449		13	109.983	70.017		13	68.423	111.577		13	0	180		13	35.08	144.92		13	115.006	64.994			109.606	42.5501	13.4555
		51	14	139.95	40.05		14	66.837	113.163		14	58.81	121.19		14	65.225	114.775		14	115.719	64.281		14	110.556	69.444		14	111.991	68.009		14	0	180		14	63.435	116.565		14	101.617	78.383			96.586	40.4044	12.777
		54	15	146.492	33.508		15	87.647	92.353		15	60.968	119.032		15	73.932	106.068		15	117.507	62.493		15	149.151	30.849		15	113.839	66.161		15	0	180		15	97.919	82.081		15	118.361	61.639			83.4184	44.2914	14.0062
		57	16	168.111	11.889		16	83.56	96.44		16	83.558	96.442		16	119.745	60.255		16	138.784	41.216		16	126.404	53.596		16	123.959	56.041		16	0	180		16	65.638	114.362		16	107.559	72.441			78.2682	46.6105	14.7395
		60	17	171.416	8.584		17	89.577	90.423		17	102.025	77.975		17	115.889	64.111		17	165.53	14.47		17	139.112	40.888		17	137.27	42.73		17	23.499	156.501		17	105.255	74.745		17	145.176	34.824			60.5251	43.2134	13.6653
		63	18	136.643	43.357		18	84.56	95.44		18	116.565	63.435		18	122.905	57.095		18	165.53	14.47		18	137.344	42.656		18	149.119	30.881		18	16.817	163.183		18	109.075	70.925		18	152.158	27.842			60.9284	42.9037	13.5673
		66	19	115.034	64.966		19	111.318	68.682		19	120.964	59.036		19	154.983	25.017		19	165.53	14.47		19	147.96	32.04		19	158.369	21.631		19	32.586	147.414		19	138.532	41.468		19	165.75	14.25			48.8974	40.1341	12.6915
		69	20	125.594	54.406		20	122.807	57.193		20	135.713	44.287		20	161.565	18.435		20	133.995	46.005		20	157.767	22.233		20	158.369	21.631		20	47.716	132.284		20	138.532	41.468		20	165.75	14.25			45.2192	34.2942	10.8448
		72	21	112.878	67.122		21	116.003	63.997		21	128.174	51.826		21	148.314	31.686		21	133.995	46.005		21	167.335	12.665		21	162.007	17.993		21	56.31	123.69		21	136.109	43.891		21	175.236	4.764			46.3639	34.3895	10.8749
		75	22	110.83	69.17		22	121.703	58.297		22	121.759	58.241		22	148.314	31.686		22	133.995	46.005		22	167.335	12.665		22	162.007	17.993		22	63.732	116.268		22	136.109	43.891		22	175.236	4.764			45.898	32.6271	10.3176
		78	23	118.347	61.653		23	125.667	54.333		23	132.839	47.161		23	148.314	31.686		23	167.168	12.832		23	167.335	12.665		23	167.384	12.616		23	73.324	106.676		23	146.881	33.119		23	175.236	4.764			37.7505	31.1161	9.83976
		81	24	116.565	63.435		24	132.674	47.326		24	135.818	44.182		24	152.021	27.979		24	167.168	12.832		24	167.335	12.665		24	177.709	2.291		24	77.523	102.477		24	146.881	33.119		24	175.236	4.764			35.107	30.957	9.78946
		84	25	115.346	64.654		25	153.367	26.633		25	148.325	31.675		25	152.021	27.979		25	167.168	12.832		25	167.335	12.665		25	177.709	2.291		25	84.52	95.48		25	165.256	14.744		25	175.236	4.764			29.3717	29.3171	9.27089
		87	26	113.199	66.801		26	146.821	33.179		26	144.92	35.08		26	152.021	27.979		26	167.168	12.832		26	167.335	12.665		26	177.709	2.291		26	85.815	94.185		26	165.256	14.744		26	175.236	4.764			30.452	29.3345	9.27638
		90	27	113.199	66.801		27	153.435	26.565		27	144.92	35.08		27	152.021	27.979		27	167.168	12.832		27	161.694	18.306		27	177.709	2.291		27	80.391	99.609		27	175.236	4.764		27	175.236	4.764			29.8991	31.1168	9.84
		93	28	113.199	66.801		28	161.565	18.435		28	144.92	35.08		28	152.021	27.979		28	167.168	12.832		28	161.694	18.306		28	177.709	2.291		28	109.566	70.434		28	175.236	4.764		28	175.236	4.764			26.1686	24.6735	7.80246
		96	29	115.046	64.954		29	161.565	18.435		29	145.72	34.28		29	148.333	31.667		29	167.168	12.832		29	161.694	18.306		29	177.709	2.291		29	101.31	78.69		29	175.236	4.764		29	175.236	4.764			27.0983	26.1112	8.25708
		99	30	113.029	66.971		30	161.565	18.435		30	145.72	34.28		30	148.333	31.667		30	167.168	12.832		30	161.694	18.306		30	177.709	2.291		30	101.535	78.465		30	178.493	1.507		30	175.236	4.764			26.9518	26.72	8.44961
		102	31	113.029	66.971		31	161.565	18.435		31	147.839	32.161		31	148.333	31.667		31	167.168	12.832		31	161.694	18.306		31	177.709	2.291		31	138.916	41.084		31	178.493	1.507		31	175.236	4.764			23.0018	20.5187	6.48858
		105	32	113.029	66.971		32	161.565	18.435		32	147.839	32.161		32	148.333	31.667		32	167.168	12.832		32	161.694	18.306		32	177.709	2.291		32	127.153	52.847		32	178.493	1.507		32	175.236	4.764			24.1781	21.9572	6.94348
		108	33	113.029	66.971		33	161.565	18.435		33	147.839	32.161		33	148.333	31.667		33	167.168	12.832		33	161.694	18.306		33	177.709	2.291		33	129.692	50.308		33	174.631	5.369		33	175.236	4.764			24.3104	21.1859	6.69956
		111	34	113.029	66.971		34	161.565	18.435		34	147.839	32.161		34	142.696	37.304		34	167.168	12.832		34	161.694	18.306		34	177.709	2.291		34	125.123	54.877		34	174.631	5.369		34	175.236	4.764			25.331	22.1166	6.9939
		114	35	113.029	66.971		35	161.565	18.435		35	147.839	32.161		35	142.696	37.304		35	167.168	12.832		35	161.694	18.306		35	177.709	2.291		35	120.964	59.036		35	174.631	5.369		35	175.236	4.764			25.7469	22.7636	7.19849
		117	36	113.029	66.971		36	161.565	18.435		36	147.839	32.161		36	142.696	37.304		36	167.168	12.832		36	161.694	18.306		36	177.709	2.291		36	112.249	67.751		36	174.631	5.369		36	175.236	4.764			26.6184	24.295	7.68276
		120	37	113.029	66.971		37	161.565	18.435		37	147.839	32.161		37	150.895	29.105		37	167.168	12.832		37	161.694	18.306		37	177.709	2.291		37	112.249	67.751		37	174.631	5.369		37	175.236	4.764			25.7985	24.0312	7.59935
		123	38	106.341	73.659		38	161.565	18.435		38	147.839	32.161		38	150.895	29.105		38	167.168	12.832		38	161.694	18.306		38	177.709	2.291		38	112.249	67.751		38	174.631	5.369		38	175.236	4.764			26.4673	25.3607	8.01976
		126	39	106.341	73.659		39	161.565	18.435		39	147.839	32.161		39	150.895	29.105		39	167.168	12.832		39	161.694	18.306		39	177.709	2.291		39	112.249	67.751		39	174.631	5.369		39	175.236	4.764			26.4673	25.3607	8.01976
		129	40	106.341	73.659		40	161.565	18.435		40	147.839	32.161		40	150.895	29.105		40	167.168	12.832		40	161.694	18.306		40	177.709	2.291		40	112.249	67.751		40	174.631	5.369		40	175.236	4.764			26.4673	25.3607	8.01976
		132	41	119.876	60.124		41	161.565	18.435		41	147.839	32.161		41	150.895	29.105		41	167.168	12.832		41	161.694	18.306		41	177.709	2.291		41	112.249	67.751		41	174.631	5.369		41	175.236	4.764			25.1138	22.7935	7.20793
			42	119.876	60.124										42	150.895	29.105						42	161.694	18.306		42	177.709	2.291						42	174.631	5.369		42	175.236	4.764
																																			43	174.631	5.369
Date: 2015.02.16
n=10 seedlings/line																																											Col-0-WT	average	stDEV	stERROR
	Col-0-WT	12	1	47.406	132.594		1	91.245	88.755		1	121.275	58.725		1	86.566	93.434		1	125.727	54.273		1	120.651	59.349		1	83.501	96.499		1	125.311	54.689		1	98.076	81.924		1	115.526	64.474			78.4716	25.1628	7.95716
	mock	15	2	35.538	144.462		2	104.657	75.343		2	90	90		2	62.987	117.013		2	67.834	112.166		2	120.651	59.349		2	93.691	86.309		2	59.139	120.861		2	19.983	160.017		2	109.44	70.56			103.608	32.8904	10.4009
		18	3	23.199	156.801		3	47.705	132.295		3	93.705	86.295		3	26.565	153.435		3	49.699	130.301		3	33.453	146.547		3	10.505	169.495		3	21.125	158.875		3	0	180		3	102.103	77.897			139.194	33.6977	10.6561
		21	4	0	180		4	10.305	169.695		4	97.125	82.875		4	0	180		4	120.964	59.036		4	33.453	146.547		4	0	180		4	0	180		4	0	180		4	79.154	100.846			145.9	47.0556	14.8803
		24	5	0	180		5	0	180		5	43.122	136.878		5	0	180		5	22.529	157.471		5	0	180		5	0	180		5	0	180		5	0	180		5	19.636	160.364			171.471	15.0009	4.74371
		27	6	0	180		6	0	180		6	36.285	143.715		6	0	180		6	0	180		6	0	180		6	0	180		6	0	180		6	0	180		6	0	180			176.372	11.4743	3.6285
		30	7	0	180		7	0	180		7	0	180		7	0	180		7	0	180		7	0	180		7	0	180		7	0	180		7	0	180		7	0	180			180	0	0
		33	8	0	180		8	0	180		8	0	180		8	0	180		8	0	180		8	0	180		8	0	180		8	0	180		8	0	180		8	0	180			180	0	0
		36	9	0	180		9	0	180		9	0	180		9	0	180		9	0	180		9	0	180		9	0	180		9	0	180		9	0	180		9	0	180			180	0	0
		39	10	0	180		10	0	180		10	0	180		10	0	180		10	0	180		10	0	180		10	0	180		10	0	180		10	0	180		10	0	180			180	0	0
		42	11	0	180		11	0	180		11	0	180		11	0	180		11	0	180		11	0	180		11	0	180		11	0	180		11	0	180		11	0	180			180	0	0
		45	12	0	180		12	0	180		12	0	180		12	0	180		12	0	180		12	0	180		12	0	180		12	0	180		12	0	180		12	0	180			180	0	0
		48	13	0	180		13	0	180		13	0	180		13	0	180		13	0	180		13	0	180		13	0	180		13	0	180		13	0	180		13	0	180			180	0	0
		51	14	0	180		14	0	180		14	37.747	142.253		14	0	180		14	0	180		14	0	180		14	0	180		14	0	180		14	0	180		14	0	180			176.225	11.9366	3.7747
		54	15	0	180		15	0	180		15	48.366	131.634		15	0	180		15	0	180		15	0	180		15	0	180		15	0	180		15	0	180		15	0	180			175.163	15.2947	4.8366
		57	16	0	180		16	0	180		16	51.304	128.696		16	0	180		16	0	180		16	0	180		16	0	180		16	0	180		16	0	180		16	47.663	132.337			170.103	20.8817	6.60338
		60	17	0	180		17	0	180		17	59.323	120.677		17	0	180		17	0	180		17	0	180		17	0	180		17	0	180		17	0	180		17	61.587	118.413			167.909	25.4957	8.06243
		63	18	0	180		18	62.41	117.59		18	48.617	131.383		18	13.778	166.222		18	0	180		18	0	180		18	0	180		18	0	180		18	0	180		18	48.532	131.468			162.666	25.3842	8.0272
		66	19	0	180		19	78.69	101.31		19	64.006	115.994		19	39.289	140.711		19	27.142	152.858		19	0	180		19	0	180		19	0	180		19	0	180		19	60.698	119.302			153.017	31.5751	9.98493
		69	20	0	180		20	63.435	116.565		20	78.492	101.508		20	65.783	114.217		20	53.909	126.091		20	0	180		20	53.13	126.87		20	0	180		20	0	180		20	77.619	102.381			140.763	34.7544	10.9903
		72	21	0	180		21	75.324	104.676		21	92.183	87.817		21	65.783	114.217		21	61.759	118.241		21	0	180		21	59.172	120.828		21	27.15	152.85		21	0	180		21	100.944	79.056			131.768	38.6988	12.2376
		75	22	45	135		22	91.425	88.575		22	81.911	98.089		22	63.435	116.565		22	48.898	131.102		22	0	180		22	54.666	125.334		22	38.904	141.096		22	73.278	106.722		22	105.338	74.662			119.715	30.0596	9.50567
		78	23	60.656	119.344		23	87.064	92.936		23	113.736	66.264		23	67.38	112.62		23	63.526	116.474		23	0	180		23	66.76	113.24		23	52.58	127.42		23	51.499	128.501		23	108.395	71.605			112.84	32.1279	10.1597
		81	24	69.717	110.283		24	90	90		24	115.931	64.069		24	58.601	121.399		24	65.705	114.295		24	0	180		24	50.711	129.289		24	52.684	127.316		24	45.272	134.728		24	108.07	71.93			114.331	33.505	10.5952
		84	25	69.053	110.947		25	79.542	100.458		25	114.775	65.225		25	85.49	94.51		25	69.291	110.709		25	56.31	123.69		25	60.826	119.174		25	50.935	129.065		25	86.82	93.18		25	113.982	66.018			101.298	22.1917	7.01764
		87	26	89.597	90.403		26	84.615	95.385		26	110.788	69.212		26	107.103	72.897		26	105.127	74.873		26	55.235	124.765		26	80.473	99.527		26	72.549	107.451		26	63.435	116.565		26	111.88	68.12			91.9198	20.3692	6.44129
		90	27	106.074	73.926		27	102.665	77.335		27	136.507	43.493		27	93.814	86.186		27	106.006	73.994		27	59.744	120.256		27	70.169	109.831		27	60.255	119.745		27	63.98	116.02		27	126.277	53.723			87.4509	27.8367	8.80275
		93	28	88.091	91.909		28	84.207	95.793		28	146.698	33.302		28	101.31	78.69		28	99.162	80.838		28	73.301	106.699		28	83.089	96.911		28	65.556	114.444		28	91.414	88.586		28	131.309	48.691			83.5863	25.1328	7.9477
		96	29	108.435	71.565		29	116.565	63.435		29	114.848	65.152		29	106.699	73.301		29	100.997	79.003		29	72.019	107.981		29	74.174	105.826		29	69.814	110.186		29	72.435	107.565		29	131.309	48.691			83.2705	22.6228	7.15395
		99	30	111.14	68.86		30	105.156	74.844		30	115.887	64.113		30	106.699	73.301		30	107.65	72.35		30	71.565	108.435		30	67.604	112.396		30	71.2	108.8		30	66.774	113.226		30	149.452	30.548			82.6873	27.2258	8.60957
		102	31	101.908	78.092		31	113.351	66.649		31	104.036	75.964		31	140.648	39.352		31	114.501	65.499		31	70.508	109.492		31	90.313	89.687		31	73.485	106.515		31	71.165	108.835		31	149.452	30.548			77.0633	27.725	8.76742
		105	32	101.908	78.092		32	119.187	60.813		32	121.809	58.191		32	140.648	39.352		32	110.271	69.729		32	68.163	111.837		32	97.417	82.583		32	81.491	98.509		32	71.194	108.806		32	169.992	10.008			71.792	31.6631	10.0128
		108	33	12.1931	167.807		33	119.187	60.813		33	121.809	58.191		33	147.325	32.675		33	119.287	60.713		33	68.323	111.677		33	99.574	80.426		33	87.146	92.854		33	78.085	101.915		33	169.992	10.008			77.7079	44.2981	14.0083
		111	34	121.931	58.069		34	118.283	61.717		34	121.809	58.191		34	147.325	32.675		34	119.932	60.068		34	70.89	109.11		34	95.648	84.352		34	99.978	80.022		34	80.893	99.107		34	169.992	10.008			65.3319	29.6396	9.37287
		114	35	95.59	84.41		35	118.283	61.717		35	121.809	58.191		35	152.19	27.81		35	114.634	65.366		35	70.017	109.983		35	103.685	76.315		35	100.491	79.509		35	82.74	97.26		35	171.787	8.213			66.8774	30.5675	9.6663
		117	36	111.615	68.385		36	118.283	61.717		36	121.809	58.191		36	152.19	27.81		36	122.561	57.439		36	74.745	105.255		36	120.228	59.772		36	105.884	74.116		36	76.057	103.943		36	171.787	8.213			62.4841	29.6606	9.37952
		120	37	111.615	68.385		37	118.283	61.717		37	145.835	34.165		37	152.19	27.81		37	117.657	62.343		37	61.954	118.046		37	107.343	72.657		37	116.08	63.92		37	84.289	95.711		37	171.787	8.213			61.2967	32.0895	10.1476
		123	38	98.531	81.469		38	139.044	40.956		38	145.835	34.165		38	152.19	27.81		38	123.256	56.744		38	77.65	102.35		38	107.343	72.657		38	90	90		38	84.665	95.335		38	171.787	8.213			60.9699	32.1673	10.1722
		126	39	98.531	81.469		39	139.044	40.956		39	145.835	34.165		39	152.19	27.81		39	123.256	56.744		39	77.65	102.35		39	107.343	72.657		39	99.951	80.049		39	84.665	95.335		39	171.787	8.213			59.9748	31.312	9.90172
		129	40	98.531	81.469		40	139.044	40.956		40	145.835	34.165		40	152.19	27.81		40	123.256	56.744		40	77.65	102.35		40	107.343	72.657		40	99.951	80.049		40	84.665	95.335		40	171.787	8.213			59.9748	31.312	9.90172
		132	41	98.531	81.469		41	151.26	28.74		41	145.835	34.165		41	152.19	27.81		41	128.543	51.457		41	77.65	102.35		41	107.343	72.657		41	102.995	77.005		41	84.665	95.335		41	171.787	8.213			57.9201	32.2229	10.1898
		135	42	118.752	61.248		42	151.26	28.74		42	145.835	34.165		42	152.19	27.81		42	128.543	51.457		42	92.992	87.008		42	94.659	85.341		42	102.995	77.005		42	84.665	95.335		42	171.787	8.213			55.6322	30.1032	9.51946
		138	43	118.752	61.248		43	151.26	28.74		43	143.973	36.027		43	152.19	27.81		43	128.543	51.457		43	92.992	87.008		43	94.659	85.341		43	125.811	54.189		43	84.665	95.335		43	171.787	8.213			53.5368	29.0224	9.1777
																																											MOCK
	WES1D																																											average	stDEV	sTERROR
	MOCK		1	117.539	62.461		1	131.248	48.752		1	105.018	74.982		1	60.832	119.168		1	37.5	142.5		1	67.834	112.166		1	77.645	102.355		1	63.435	116.565		1	141.34	38.66		1	42.064	137.936			95.5545	36.9191	11.6748
			2	98.297	81.703		2	132.436	47.564		2	58.643	121.357		2	113.385	66.615		2	97.125	82.875		2	63.435	116.565		2	74.662	105.338		2	90	90		2	138.814	41.186		2	35.538	144.462			89.7665	32.8969	10.4029
			3	40.875	139.125		3	87.474	92.526		3	32.421	147.579		3	121.945	58.055		3	102.529	77.471		3	41.319	138.681		3	24.39	155.61		3	71.25	108.75		3	50.004	129.996		3	34.862	145.138			119.293	33.3292	10.5396
			4	0	180		4	47.353	132.647		4	9.273	170.727		4	57.691	122.309		4	125.385	54.615		4	24.444	155.556		4	3.311	176.689		4	53.13	126.87		4	68.416	111.584		4	87.879	92.121			132.312	40.0985	12.6803
			5	0	180		5	68.654	111.346		5	0	180		5	0	180		5	56.271	123.729		5	17.969	162.031		5	2.49	177.51		5	0	180		5	79.017	100.983		5	46.736	133.264			152.886	32.1201	10.1573
			6	0	180		6	48.311	131.689		6	0	180		6	0	180		6	45	135		6	32.421	147.579		6	0	180		6	0	180		6	43.713	136.287		6	46.042	133.958			158.451	23.0875	7.30091
			7	0	180		7	52.001	127.999		7	0	180		7	0	180		7	47.49	132.51		7	28.191	151.809		7	1.137	178.863		7	0	180		7	54.019	125.981		7	39.352	140.648			157.781	24.2332	7.6632
			8	0	180		8	17.639	162.361		8	0	180		8	0	180		8	41.634	138.366		8	32.389	147.611		8	22.825	157.175		8	0	180		8	41.987	138.013		8	1.548	178.452			164.198	17.8971	5.65957
			9	0	180		9	0	180		9	49.086	130.914		9	0	180		9	66.297	113.703		9	43.464	136.536		9	15.662	164.338		9	0	180		9	43.968	136.032		9	1.548	178.452			157.998	25.8921	8.18781
			10	0	180		10	0	180		10	59.886	120.114		10	0	180		10	72.908	107.092		10	39.031	140.969		10	51.437	128.563		10	0	180		10	52.125	127.875		10	1.548	178.452			152.306	30.0392	9.49924
			11	0	180		11	0	180		11	85.236	94.764		11	0	180		11	83.907	96.093		11	59.47	120.53		11	69.944	110.056		11	0	180		11	45	135		11	1.548	178.452			145.489	37.789	11.9499
			12	0	180		12	76.201	103.799		12	98.477	81.523		12	0	180		12	101.393	78.607		12	75.681	104.319		12	110.628	69.372		12	0	180		12	87.889	92.111		12	1.548	178.452			124.818	48.3364	15.2853
			13	71.565	108.435		13	70.71	109.29		13	103.565	76.435		13	58.079	121.921		13	142.815	37.185		13	97.815	82.185		13	146.172	33.828		13	27.101	152.899		13	120.141	59.859		13	46.868	133.132			91.5169	40.3083	12.7466
			14	70.017	109.983		14	77.905	102.095		14	105.578	74.422		14	77.471	102.529		14	152.479	27.521		14	115.641	64.359		14	150.68	29.32		14	40.764	139.236		14	114.341	65.659		14	65.186	114.814			82.9938	37.0134	11.7047
			15	74.005	105.995		15	67.806	112.194		15	105.967	74.033		15	100.346	79.654		15	158.801	21.199		15	133.059	46.941		15	158.381	21.619		15	54.399	125.601		15	130.601	49.399		15	39.56	140.44			77.7075	42.5872	13.4673
			16	78.503	101.497		16	71.565	108.435		16	105.904	74.096		16	100.919	79.081		16	169.38	10.62		16	138.759	41.241		16	162.508	17.492		16	55.181	124.819		16	139.825	40.175		16	70.278	109.722			70.7178	41.0231	12.9726
			17	78.712	101.288		17	79.752	100.248		17	112.194	67.806		17	114.014	65.986		17	169.38	10.62		17	133.668	46.332		17	167.196	12.804		17	68.455	111.545		17	150.945	29.055		17	89.723	90.277			63.5961	37.5291	11.8677
			18	90	90		18	90	90		18	119.432	60.568		18	122.554	57.446		18	169.38	10.62		18	121.43	58.57		18	161.095	18.905		18	92.376	87.624		18	159.274	20.726		18	112.473	67.527			56.1986	30.0994	9.51826
			19	108.821	71.179		19	93.576	86.424		19	118.811	61.189		19	140.004	39.996		19	165.603	14.397		19	133.858	46.142		19	175.008	4.992		19	94.535	85.465		19	155.879	24.121		19	126.027	53.973			48.7878	28.3574	8.9674
			20	112.703	67.297		20	87.138	92.862		20	124.154	55.846		20	144.426	35.574		20	165.603	14.397		20	143.089	36.911		20	173.536	6.464		20	114.295	65.705		20	166.891	13.109		20	123.111	56.889			44.5054	28.0199	8.86068
			21	125.203	54.797		21	98.761	81.239		21	128.454	51.546		21	152.354	27.646		21	165.603	14.397		21	149.284	30.716		21	173.536	6.464		21	127.379	52.621		21	173.234	6.766		21	132.493	47.507			37.3699	24.3193	7.69045
			22	120.732	59.268		22	105.396	74.604		22	134.424	45.576		22	139.95	40.05		22	165.603	14.397		22	159.905	20.095		22	173.536	6.464		22	149.184	30.816		22	177.354	2.646		22	149.676	30.324			32.424	23.035	7.28431
			23	130.096	49.904		23	124.579	55.421		23	133.668	46.332		23	153.548	26.452		23	165.603	14.397		23	145.912	34.088		23	173.536	6.464		23	160.253	19.747		23	177.354	2.646		23	167.328	12.672			26.8123	18.8203	5.95151
			24	140.404	39.596		24	113.199	66.801		24	140.711	39.289		24	163.043	16.957		24	165.603	14.397		24	152.557	27.443		24	173.536	6.464		24	160.253	19.747		24	177.354	2.646		24	167.328	12.672			24.6012	19.3474	6.11818
			25	136.559	43.441		25	109.44	70.56		25	134.148	45.852		25	160.121	19.879		25	165.603	14.397		25	163.723	16.277		25	173.536	6.464		25	162.979	17.021		25	177.354	2.646		25	178.255	1.745			23.8282	22.359	7.07055
			26	124.236	55.764		26	125.72	54.28		26	134.148	45.852		26	160.121	19.879		26	165.603	14.397		26	157.757	22.243		26	173.536	6.464		26	162.979	17.021		26	177.354	2.646		26	176.658	3.342			24.1888	20.4239	6.45862
			27	141.994	38.006		27	128.301	51.699		27	134.148	45.852		27	160.121	19.879		27	165.603	14.397		27	161.794	18.206		27	173.536	6.464		27	172.996	7.004		27	177.354	2.646		27	176.658	3.342			20.7495	18.1266	5.73212
			28	141.994	38.006		28	136.878	43.122		28	134.148	45.852		28	160.121	19.879		28	165.603	14.397		28	161.794	18.206		28	173.536	6.464		28	172.996	7.004		28	177.354	2.646		28	176.658	3.342			19.8918	16.6415	5.2625
			29	141.994	38.006		29	126.843	53.157		29	134.148	45.852		29	160.121	19.879		29	165.603	14.397		29	161.794	18.206		29	173.536	6.464		29	172.996	7.004		29	177.354	2.646		29	176.658	3.342			20.8953	18.4069	5.82076
			30	141.994	38.006		30	145.733	34.267		30	135.785	44.215		30	173.792	6.208		30	165.603	14.397		30	161.794	18.206		30	173.536	6.464		30	178.831	1.169		30	177.354	2.646		30	176.658	3.342			16.892	16.1893	5.11951
			31	141.994	38.006		31	152.585	27.415		31	135.785	44.215		31	173.792	6.208		31	165.603	14.397		31	161.794	18.206		31	173.536	6.464		31	178.831	1.169		31	177.354	2.646		31	176.658	3.342			16.2068	15.5027	4.90237
			32	141.994	38.006		32	152.585	27.415		32	135.785	44.215		32	173.792	6.208		32	165.603	14.397		32	161.794	18.206		32	173.536	6.464		32	178.831	1.169		32	177.354	2.646		32	176.658	3.342			16.2068	15.5027	4.90237
			33	141.994	38.006		33	149.268	30.732		33	135.785	44.215		33	173.792	6.208		33	165.603	14.397		33	161.794	18.206		33	173.536	6.464		33	178.831	1.169		33	177.354	2.646		33	176.658	3.342			16.5385	15.8017	4.99694
			34	141.994	38.006		34	149.268	30.732		34	135.785	44.215		34	173.792	6.208		34	165.603	14.397		34	161.794	18.206		34	173.536	6.464		34	178.831	1.169		34	177.354	2.646		34	176.658	3.342			16.5385	15.8017	4.99694
			35	141.994	38.006		35	149.268	30.732		35	135.785	44.215		35	173.792	6.208		35	165.603	14.397		35	161.794	18.206		35	173.536	6.464		35	178.831	1.169		35	177.354	2.646		35	176.658	3.342			16.5385	15.8017	4.99694
			36	148.824	31.176		36	149.268	30.732		36	135.785	44.215		36	173.792	6.208		36	165.603	14.397		36	161.794	18.206		36	173.536	6.464		36	178.831	1.169		36	177.354	2.646		36	176.658	3.342			15.8555	14.8922	4.70931
			37	148.824	31.176		37	149.268	30.732		37	135.785	44.215		37	173.792	6.208		37	165.603	14.397		37	161.794	18.206		37	173.536	6.464		37	178.831	1.169		37	177.354	2.646		37	176.658	3.342			15.8555	14.8922	4.70931
			38	148.824	31.176		38	149.268	30.732		38	135.785	44.215		38	173.792	6.208		38	165.603	14.397		38	161.794	18.206		38	173.536	6.464		38	178.831	1.169		38	177.354	2.646		38	176.658	3.342			15.8555	14.8922	4.70931
			39	148.824	31.176		39	149.268	30.732		39	135.785	44.215		39	173.792	6.208		39	165.603	14.397		39	161.794	18.206		39	173.536	6.464		39	178.831	1.169		39	177.354	2.646		39	176.658	3.342			15.8555	14.8922	4.70931
			40	148.824	31.176		40	149.268	30.732		40	135.785	44.215		40	173.792	6.208		40	165.603	14.397		40	161.794	18.206		40	173.536	6.464		40	178.831	1.169		40	177.354	2.646		40	176.658	3.342			15.8555	14.8922	4.70931
			41	148.824	31.176		41	149.268	30.732		41	135.785	44.215		41	173.792	6.208		41	165.603	14.397		41	161.794	18.206		41	173.536	6.464		41	178.831	1.169		41	177.354	2.646		41	176.658	3.342			15.8555	14.8922	4.70931
			42	148.824	31.176		42	149.268	30.732		42	135.785	44.215		42	173.792	6.208		42	165.603	14.397		42	161.794	18.206		42	173.536	6.464		42	178.831	1.169		42	177.354	2.646		42	176.658	3.342			15.8555	14.8922	4.70931
			43	148.824	31.176		43	149.268	30.732		43	135.785	44.215		43	173.792	6.208		43	165.603	14.397		43	161.794	18.206		43	173.536	6.464		43	178.831	1.169		43	177.354	2.646		43	176.658	3.342			15.8555	14.8922	4.70931
Date: 2015.03.10
n=10 seedlings/line
	Col-0-WT	12	1	117.578	62.422		1	119.745	60.255		1	73.78	106.22		1	53.13	126.87		3	110.066	69.934		1	100.846	79.154		1	109.053	70.947		1	95.404	84.596		1	81.87	98.13		1	131.186	48.814			80.7342	23.7677	7.516
	mock	15	2	118.03	61.97		2	73.768	106.232		2	77.452	102.548		2	65.879	114.121		4	94.086	85.914		2	98.82	81.18		2	102.529	77.471		2	72.067	107.933		2	65.12	114.88		2	101.524	78.476			90.1063	22.7954	7.20854
		18	3	67.134	112.866		3	39.094	140.906		3	16.618	163.382		3	37.355	142.645		5	62.534	117.466		3	88.091	91.909		3	86.82	93.18		3	16.531	163.469		3	46.721	133.279		3	0	180			123.758	29.9008	9.45545
		21	4	15.255	164.745		4	20.556	159.444		4	0	180		4	32.905	147.095		6	66.318	113.682		4	63.229	116.771		4	20.83	159.17		4	0	180		4	0	180		4	0	180			158.091	25.3151	8.00535
		24	5	0	180		5	21.371	158.629		5	0	180		5	0	180		7	40.496	139.504		5	22.726	157.274		5	0	180		5	0	180		5	0	180		5	0	180			171.541	14.5202	4.59168
		27	6	0	180		6	0	180		6	0	180		6	0	180		8	0	180		6	9.162	170.838		6	0	180		6	0	180		6	0	180		6	0	180			179.084	2.89728	0.9162
		30	7	0	180		7	0	180		7	0	180		7	0	180		9	0	180		7	0	180		7	0	180		7	0	180		7	0	180		7	0	180			180	0	0
		33	8	0	180		8	0	180		8	0	180		8	0	180		10	0	180		8	0	180		8	0	180		8	0	180		8	0	180		8	0	180			180	0	0
		36	9	0	180		9	0	180		9	0	180		9	0	180		11	0	180		9	0	180		9	0	180		9	0	180		9	0	180		9	0	180			180	0	0
		39	10	0	180		10	0	180		10	0	180		10	0	180		12	0	180		10	0	180		10	0	180		10	0	180		10	0	180		10	0	180			180	0	0
		42	11	0	180		11	0	180		11	0	180		11	0	180		13	0	180		11	0	180		11	0	180		11	0	180		11	0	180		11	0	180			180	0	0
		45	12	0	180		12	0	180		12	0	180		12	0	180		14	0	180		12	0	180		12	0	180		12	0	180		12	0	180		12	0	180			180	0	0
		48	13	0	180		13	0	180		13	0	180		13	0	180		15	0	180		13	0	180		13	0	180		13	0	180		13	0	180		13	0	180			180	0	0
		51	14	51.34	128.66		14	0	180		14	0	180		14	0	180		16	0	180		14	0	180		14	0	180		14	0	180		14	0	180		14	34.661	145.339			174.866	16.2351	5.134
		54	15	20.705	159.295		15	0	180		15	15.945	164.055		15	0	180		17	0	180		15	0	180		15	0	180		15	0	180		15	0	180		15	45	135			172.869	12.3639	3.90982
		57	16	32.735	147.265		16	0	180		16	26.433	153.567		16	19.96	160.04		18	0	180		16	0	180		16	0	180		16	0	180		16	0	180		16	47.49	132.51			167.587	17.1688	5.42925
		60	17	50.352	129.648		17	29.932	150.068		17	27.009	152.991		17	28.263	151.737		19	0	180		17	15.945	164.055		17	0	180		17	45.796	134.204		17	0	180		17	59.931	120.069			155.521	19.9284	6.30192
		63	18	56.132	123.868		18	46.626	133.374		18	53.735	126.265		18	39.397	140.603		20	0	180		18	66.448	113.552		18	0	180		18	49.236	130.764		18	0	180		18	75.069	104.931			142.849	26.6542	8.42879
		66	19	45.63	134.37		19	55.635	124.365		19	59.931	120.069		19	36.579	143.421		21	36.87	143.13		19	46.287	133.713		19	0	180		19	57.195	122.805		19	14.47	165.53		19	107.292	72.708			137.233	22.199	7.01994
		69	20	88.843	91.157		20	62.791	117.209		20	59.931	120.069		20	40.893	139.107		22	60.945	119.055		20	52.59	127.41		20	21.881	158.119		20	48.402	131.598		20	20.947	159.053		20	56.238	123.762			123.549	26.8409	8.48784
		72	21	58.841	121.159		21	67.094	112.906		21	47.732	132.268		21	37.405	142.595		23	60.945	119.055		21	61.504	118.496		21	29.869	150.131		21	54.791	125.209		21	20.136	159.864		21	64.704	115.296			130.544	15.4283	4.87886
		75	22	57.894	122.106		22	58.176	121.824		22	70.282	109.718		22	67.635	112.365		24	64.22	115.78		22	65.471	114.529		22	43.152	136.848		22	68.983	111.017		22	68.629	111.371		22	33.476	146.524			117.085	8.13568	2.57273
		78	23	74.79	105.21		23	65.283	114.717		23	63.786	116.214		23	67.751	112.249		25	65.543	114.457		23	64.179	115.821		23	41.454	138.546		23	77.034	102.966		23	66.448	113.552		23	98.054	81.946			118.026	13.782	4.35824
		81	24	75.386	104.614		24	68.932	111.068		24	64.892	115.108		24	74.619	105.381		26	104.801	75.199		24	70.519	109.481		24	55.793	124.207		24	77.02	102.98		24	82.776	97.224		24	116.489	63.511			102.721	14.759	4.66721
		84	25	75.236	104.764		25	66.992	113.008		25	63.987	116.013		25	99.802	80.198		27	94.167	85.833		25	70.519	109.481		25	44.825	135.175		25	84.423	95.577		25	71.975	108.025		25	131.511	48.489			101.158	20.4676	6.47242
		87	26	80.362	99.638		26	85.125	94.875		26	66.677	113.323		26	99.802	80.198		28	116.761	63.239		26	81.68	98.32		26	98.16	81.84		26	76.979	103.021		26	71.565	108.435		26	137.726	42.274			89.1378	20.6392	6.52668
		90	27	92.726	87.274		27	85.173	94.827		27	102.509	77.491		27	124.832	55.168		29	116.053	63.947		27	80.134	99.866		27	107.314	72.686		27	99.252	80.748		27	96.464	83.536		27	153.034	26.966			75.7817	17.826	5.63708
		93	28	81.908	98.092		28	98.842	81.158		28	105.718	74.282		28	124.832	55.168		30	113.127	66.873		28	85.208	94.792		28	130.781	49.219		28	114.114	65.886		28	105.456	74.544		28	148.57	31.43			68.698	21.2937	6.73367
		96	29	101.033	78.967		29	92.824	87.176		29	90.467	89.533		29	142.492	37.508		31	121.488	58.512		29	78.179	101.821		29	130.781	49.219		29	110.195	69.805		29	105.524	74.476		29	147.965	32.035			67.8447	23.2148	7.34117
		99	30	95.064	84.936		30	107.117	72.883		30	124.695	55.305		30	140.125	39.875		32	127.875	52.125		30	74.745	105.255		30	130.781	49.219		30	120.964	59.036		30	106.928	73.072		30	158.046	21.954			62.3741	21.956	6.94309
		102	31	96.654	83.346		31	96.093	83.907		31	124.8	55.2		31	140.125	39.875		33	127.875	52.125		31	78.906	101.094		31	130.781	49.219		31	103.748	76.252		31	112.911	67.089		31	158.046	21.954			63.0061	23.7653	7.51525
		105	32	98.746	81.254		32	95.539	84.461		32	126.431	53.569		32	140.125	39.875		34	120.018	59.982		32	85.87	94.13		32	133.21	46.79		32	103.748	76.252		32	165.11	14.89		32	166.059	13.941			57.3157	26.8955	8.50509
		108	33	97.785	82.215		33	95.539	84.461		33	126.431	53.569		33	138.668	41.332		35	121.667	58.333		33	89.306	90.694		33	147.734	32.266		33	103.748	76.252		33	165.11	14.89		33	166.059	13.941			54.7953	28.5684	9.03411
		111	34	97.785	82.215		34	119.055	60.945		34	126.431	53.569		34	138.668	41.332		36	121.667	58.333		34	95.404	84.596		34	147.734	32.266		34	103.748	76.252		34	165.11	14.89		34	166.059	13.941			51.8339	25.8517	8.17502
		114	35	88.88	91.12		35	119.055	60.945		35	126.431	53.569		35	138.668	41.332		37	121.667	58.333		35	95.404	84.596		35	147.734	32.266		35	103.748	76.252		35	165.11	14.89		35	166.059	13.941			52.7244	27.136	8.58114
		117	36	88.88	91.12		36	119.055	60.945		36	152.942	27.058		36	138.668	41.332		38	121.667	58.333		36	95.404	84.596		36	147.734	32.266		36	103.748	76.252		36	165.11	14.89		36	166.059	13.941			50.0733	28.3137	8.95359
		120	37	88.88	91.12		37	119.055	60.945		37	152.942	27.058		37	138.668	41.332		39	147.216	32.784		37	95.404	84.596		37	147.734	32.266		37	110.323	69.677		37	165.11	14.89		37	166.059	13.941			46.8609	27.9712	8.84527
		123	38	88.88	91.12		38	119.055	60.945		38	152.942	27.058		38	155.235	24.765		40	147.216	32.784		38	95.404	84.596		38	147.734	32.266		38	110.323	69.677		38	165.11	14.89		38	166.059	13.941			45.2042	28.813	9.11147
		126	39	88.88	91.12		39	119.055	60.945		39	152.942	27.058		39	155.235	24.765		41	147.216	32.784		39	95.404	84.596		39	176.82	3.18		39	110.323	69.677		39	177.614	2.386		39	166.059	13.941			41.0452	33.0182	10.4413
		129	40	88.88	91.12		40	119.055	60.945		40	152.942	27.058		40	155.235	24.765		42	147.216	32.784		40	95.404	84.596		40	176.82	3.18		40	110.323	69.677		40	177.614	2.386		40	166.059	13.941			41.0452	33.0182	10.4413
		132	41	106.557	73.443		41	109.277	70.723		41	152.942	27.058		41	155.235	24.765		43	147.216	32.784		41	95.404	84.596		41	176.82	3.18		41	110.323	69.677		41	177.614	2.386		41	166.059	13.941			40.2553	31.3271	9.9065
		135	42	106.557	73.443		42	109.277	70.723		42	152.942	27.058		42	155.235	24.765		44	147.216	32.784		42	95.404	84.596		42	176.82	3.18		42	110.323	69.677		42	177.614	2.386		42	166.059	13.941			40.2553	31.3271	9.9065
		138	43	106.557	73.443		43	109.277	70.723		43	152.942	27.058		43	155.235	24.765		45	147.216	32.784		43	98.898	81.102		43	176.82	3.18		43	110.323	69.677		43	177.614	2.386		43	166.059	13.941			39.9059	30.7925	9.73745
		141	44	106.557	73.443		44	109.277	70.723		44	152.942	27.058		44	155.235	24.765		46	147.216	32.784		44	98.898	81.102		44	176.82	3.18		44	110.323	69.677		44	177.614	2.386		44	166.059	13.941			39.9059	30.7925	9.73745
		144	45	106.557	73.443		45	109.277	70.723		45	152.942	27.058		45	155.235	24.765		47	147.216	32.784		45	98.898	81.102		45	176.82	3.18		45	110.323	69.677		45	177.614	2.386		45	166.059	13.941			39.9059	30.7925	9.73745
		147	46	106.557	73.443		46	109.277	70.723		46	152.942	27.058		46	155.235	24.765		48	147.216	32.784		46	98.898	81.102		46	176.82	3.18		46	110.323	69.677		46	177.614	2.386		46	166.059	13.941			39.9059	30.7925	9.73745
		150	47	106.557	73.443		47	129.343	50.657		47	152.942	27.058		47	155.235	24.765		49	147.216	32.784		47	98.898	81.102		47	176.82	3.18		47	110.323	69.677		47	177.614	2.386		47	166.059	13.941			37.8993	29.1724	9.22511
		153	48	106.557	73.443		48	129.343	50.657		48	152.942	27.058		48	155.235	24.765		50	147.216	32.784		48	98.898	81.102		48	176.82	3.18		48	110.323	69.677		48	177.614	2.386		48	166.059	13.941			37.8993	29.1724	9.22511
		156	49	106.557	73.443		49	129.343	50.657		49	152.942	27.058		49	155.235	24.765		51	147.216	32.784		49	98.898	81.102		49	176.82	3.18		49	110.323	69.677		49	177.614	2.386		49	166.059	13.941			37.8993	29.1724	9.22511
		159	50	106.557	73.443		50	129.343	50.657		50	152.942	27.058		50	155.235	24.765		52	147.216	32.784		50	98.898	81.102		50	176.82	3.18		50	110.323	69.677		50	177.614	2.386		50	166.059	13.941			37.8993	29.1724	9.22511
		162	51	106.557	73.443		51	129.343	50.657		51	152.942	27.058		51	155.235	24.765		53	147.216	32.784		51	98.898	81.102		51	176.82	3.18		51	110.323	69.677		51	177.614	2.386		51	166.059	13.941			37.8993	29.1724	9.22511
		165	52	106.557	73.443		52	129.343	50.657		52	152.942	27.058		52	155.235	24.765		54	147.216	32.784		52	98.898	81.102		52	176.82	3.18		52	110.323	69.677											41.8452	27.9685	8.84443
		168																					53	98.898	81.102		53	176.82	3.18		53	176.82	3.18											29.154	44.9883	14.2265
																																												average	stDEV	stERROR
	WES1D	12	1	139.865	40.135		1	112.834	67.166		1	106.742	73.258		1	127.546	52.454		1	95.301	84.699		1	69.212	110.788		1	90	90		1	93.18	86.82		1	126.027	53.973		1	110.772	69.228			72.8521	20.9687	6.63088
	mock	15	2	132.825	47.175		2	43.493	136.507		2	73.142	106.858		2	128.373	51.627		2	92.161	87.839		2	130.539	49.461		2	63.435	116.565		2	66.297	113.703		2	53.82	126.18		2	115.089	64.911			90.0826	34.331	10.8564
		18	3	125.334	54.666		3	76.357	103.643		3	54.839	125.161		3	125.178	54.822		3	28.926	151.074		3	141.17	38.83		3	69.944	110.056		3	45	135		3	125.538	54.462		3	28.926	151.074			97.8788	43.5332	13.7664
		21	4	115.017	64.983		4	48.013	131.987		4	3.708	176.292		4	126.353	53.647		4	21.801	158.199		4	1.332	178.668		4	35.538	144.462		4	40.236	139.764		4	113.199	66.801		4	26.565	153.435			126.824	47.2753	14.9498
		24	5	82.405	97.595		5	45	135		5	0	180		5	51.67	128.33		5	4.399	175.601		5	0	180		5	0	180		5	40.56	139.44		5	86.934	93.066		5	26.98	153.02			146.205	33.3573	10.5485
		27	6	39.512	140.488		6	20.536	159.464		6	0	180		6	11.31	168.69		6	0	180		6	0	180		6	0	180		6	42.207	137.793		6	46.091	133.909		6	38.057	141.943			160.229	19.8772	6.28574
		30	7	28.74	151.26		7	98.973	81.027		7	19.764	160.236		7	0	180		7	0	180		7	15.524	164.476		7	0	180		7	53.667	126.333		7	27.001	152.999		7	28.956	151.044			152.738	30.3104	9.58498
		33	8	0	180		8	92.337	87.663		8	15.87	164.13		8	28.729	151.271		8	0	180		8	12.095	167.905		8	24.531	155.469		8	87.274	92.726		8	2.015	177.985		8	28.359	151.641			150.879	33.8233	10.6959
		36	9	0	180		9	102.194	77.806		9	19.367	160.633		9	74.932	105.068		9	0	180		9	18.435	161.565		9	10.644	169.356		9	98.13	81.87		9	2.015	177.985		9	45.444	134.556			142.884	40.5645	12.8276
		39	10	0	180		10	124.695	55.305		10	31.139	148.861		10	50.194	129.806		10	0	180		10	18.435	161.565		10	33.69	146.31		10	108.622	71.378		10	2.015	177.985		10	34.33	145.67			139.688	43.7716	13.8418
		42	11	0	180		11	109.767	70.233		11	43.755	136.245		11	71.565	108.435		11	0	180		11	22.567	157.433		11	29.745	150.255		11	120.964	59.036		11	2.015	177.985		11	55.049	124.951			134.457	43.975	13.9061
		45	12	0	180		12	123.619	56.381		12	83.696	96.304		12	74.055	105.945		12	40.601	139.399		12	25.346	154.654		12	44.496	135.504		12	141.818	38.182		12	2.015	177.985		12	67.38	112.62			119.697	47.5325	15.0311
		48	13	31.111	148.889		13	137.599	42.401		13	105.682	74.318		13	74.055	105.945		13	51.303	128.697		13	33.328	146.672		13	43.578	136.422		13	144.678	35.322		13	19.075	160.925		13	76.357	103.643			108.323	44.655	14.1212
		51	14	43.675	136.325		14	169.452	10.548		14	85.373	94.627		14	122.421	57.579		14	33.548	146.452		14	39.204	140.796		14	52.765	127.235		14	163.113	16.887		14	30.01	149.99		14	110.454	69.546			94.9985	53.5387	16.9304
		54	15	72.81	107.19		15	175.426	4.574		15	73.789	106.211		15	144.436	35.564		15	36.498	143.502		15	48.589	131.411		15	54.569	125.431		15	160.353	19.647		15	28.31	151.69		15	104.859	75.141			90.0361	53.3623	16.8746
		57	16	73.571	106.429		16	179.66	0.34		16	88.091	91.909		16	129.56	50.44		16	84.009	95.991		16	60.562	119.438		16	55.607	124.393		16	172.355	7.645		16	57.94	122.06		16	111.801	68.199			78.6844	45.908	14.5174
		60	17	88.059	91.941		17	179.66	0.34		17	89.252	90.748		17	138.668	41.332		17	83.1	96.9		17	64.733	115.267		17	39.961	140.039		17	175.219	4.781		17	59.75	120.25		17	113.013	66.987			76.8585	47.8211	15.1224
		63	18	98.168	81.832		18	154.511	25.489		18	116.2	63.8		18	165.01	14.99		18	70.346	109.654		18	60.642	119.358		18	50.404	129.596		18	178.668	1.332		18	73.875	106.125		18	121.43	58.57			71.0746	45.8082	14.4858
		66	19	68.18	111.82		19	150.945	29.055		19	151.228	28.772		19	165.01	14.99		19	77.276	102.724		19	65.875	114.125		19	62.43	117.57		19	178.668	1.332		19	95.711	84.289		19	129.727	50.273			65.495	45.3844	14.3518
		69	20	130.244	49.756		20	150.709	29.291		20	173.273	6.727		20	172.786	7.214		20	79.808	100.192		20	73.091	106.909		20	75.75	104.25		20	178.668	1.332		20	110.821	69.179		20	138.18	41.82			51.667	41.6448	13.1692
		72	21	137.911	42.089		21	150.709	29.291		21	173.273	6.727		21	156.501	23.499		21	94.812	85.188		21	79.144	100.856		21	85.236	94.764		21	178.668	1.332		21	116.283	63.717		21	159.274	20.726			46.8189	36.8287	11.6462
		75	22	158.633	21.367		22	150.709	29.291		22	177.017	2.983		22	176.055	3.945		22	92.148	87.852		22	72.656	107.344		22	123.69	56.31		22	178.668	1.332		22	130.112	49.888		22	144.951	35.049			39.5361	36.2683	11.469
		78	23	160.358	19.642		23	162.897	17.103		23	177.017	2.983		23	176.055	3.945		23	122.896	57.104		23	75.964	104.036		23	110.854	69.146		23	178.668	1.332		23	135.297	44.703		23	169.961	10.039			33.0033	34.6042	10.9428
		81	24	160.358	19.642		24	162.897	17.103		24	177.017	2.983		24	169.695	10.305		24	63.037	116.963		24	88.39	91.61		24	128.456	51.544		24	178.668	1.332		24	128.644	51.356		24	173.606	6.394			36.9232	40.2351	12.7235
		84	25	177.064	2.936		25	162.897	17.103		25	177.017	2.983		25	169.695	10.305		25	138.16	41.84		25	88.755	91.245		25	125.786	54.214		25	178.668	1.332		25	124.783	55.217		25	173.606	6.394			28.3569	30.6994	9.70799
		87	26	177.064	2.936		26	162.897	17.103		26	177.017	2.983		26	169.526	10.474		26	138.16	41.84		26	88.755	91.245		26	125.786	54.214		26	178.668	1.332		26	133.493	46.507		26	173.606	6.394			27.5028	29.9567	9.47315
		90	27	177.064	2.936		27	162.897	17.103		27	177.017	2.983		27	169.695	10.305		27	142.765	37.235		27	82.91	97.09		27	125.786	54.214		27	178.668	1.332		27	118.664	61.336		27	173.606	6.394			29.0928	32.505	10.279
		93	28	177.064	2.936		28	162.897	17.103		28	177.017	2.983		28	169.695	10.305		28	142.765	37.235		28	70.921	109.079		28	125.786	54.214		28	178.668	1.332		28	118.664	61.336		28	173.606	6.394			30.2917	35.3851	11.1898
		96	29	178.919	1.081		29	162.897	17.103		29	177.017	2.983		29	169.695	10.305		29	139.865	40.135		29	70.921	109.079		29	125.786	54.214		29	178.668	1.332		29	107.736	72.264		29	173.606	6.394			31.489	36.8271	11.6458
		99	30	178.919	1.081		30	162.897	17.103		30	177.017	2.983		30	169.695	10.305		30	139.865	40.135		30	70.921	109.079		30	155.737	24.263		30	178.668	1.332		30	107.736	72.264		30	173.606	6.394			28.4939	35.9818	11.3785
		102	31	178.919	1.081		31	162.897	17.103		31	177.017	2.983		31	169.526	10.474		31	139.865	40.135		31	70.921	109.079		31	155.737	24.263		31	178.668	1.332		31	119.745	60.255		31	173.606	6.394			27.3099	34.5206	10.9164
		105	32	178.919	1.081		32	162.897	17.103		32	177.017	2.983		32	169.695	10.305		32	139.865	40.135		32	70.672	109.328		32	155.737	24.263		32	178.668	1.332		32	119.745	60.255		32	173.606	6.394			27.3179	34.5953	10.94
		108	33	178.919	1.081		33	162.897	17.103		33	177.017	2.983		33	169.695	10.305		33	145.392	34.608		33	70.672	109.328		33	155.737	24.263		33	178.668	1.332		33	119.745	60.255		33	173.606	6.394			26.7652	34.4115	10.8819
		111	34	178.919	1.081		34	162.897	17.103		34	177.017	2.983		34	169.695	10.305		34	145.392	34.608		34	70.672	109.328		34	155.737	24.263		34	178.668	1.332		34	119.745	60.255		34	173.606	6.394			26.7652	34.4115	10.8819
		114	35	178.919	1.081		35	162.897	17.103		35	177.017	2.983		35	169.695	10.305		35	145.392	34.608		35	70.672	109.328		35	155.737	24.263		35	178.668	1.332		35	135.246	44.754		35	173.606	6.394			25.2151	33.0578	10.4538
		117	36	178.919	1.081		36	162.897	17.103		36	177.017	2.983		36	169.526	10.474		36	145.392	34.608		36	70.672	109.328		36	155.737	24.263		36	178.668	1.332		36	135.246	44.754		36	173.606	6.394			25.232	33.0494	10.4511
		120	37	178.919	1.081		37	162.897	17.103		37	177.017	2.983		37	169.695	10.305		37	161.099	18.901		37	70.672	109.328		37	155.737	24.263		37	178.668	1.332		37	135.246	44.754		37	173.606	6.394			23.6444	32.9348	10.4149
		123	38	178.919	1.081		38	162.897	17.103		38	177.017	2.983		38	169.695	10.305		38	161.099	18.901		38	91.79	88.21		38	155.737	24.263		38	178.668	1.332		38	135.246	44.754		38	173.606	6.394			21.5326	26.9666	8.52758
		126	39	178.919	1.081		39	162.897	17.103		39	177.017	2.983		39	169.695	10.305		39	161.099	18.901		39	91.79	88.21		39	155.737	24.263		39	178.668	1.332		39	135.246	44.754		39	173.606	6.394			21.5326	26.9666	8.52758
		129	40	178.919	1.081		40	162.897	17.103		40	177.017	2.983		40	169.695	10.305		40	161.099	18.901		40	91.79	88.21		40	155.737	24.263		40	178.668	1.332		40	135.246	44.754		40	173.606	6.394			21.5326	26.9666	8.52758
		132	41	178.919	1.081		41	162.897	17.103		41	177.017	2.983		41	169.526	10.474		41	158.499	21.501		41	91.79	88.21		41	155.737	24.263		41	178.668	1.332		41	129.366	50.634		41	173.606	6.394			22.3975	27.5565	8.71414
		135	42	178.919	1.081		42	162.897	17.103		42	177.017	2.983		42	169.695	10.305		42	176.386	3.614		42	91.79	88.21		42	155.737	24.263		42	178.668	1.332		42	134.624	45.376		42	173.606	6.394			20.0661	27.6218	8.73479
		138	43	178.919	1.081		43	162.897	17.103		43	177.017	2.983		43	169.695	10.305		43	176.386	3.614		43	91.79	88.21		43	155.737	24.263		43	178.668	1.332		43	134.624	45.376		43	173.606	6.394			20.0661	27.6218	8.73479
		141	44	178.919	1.081		44	162.897	17.103		44	177.017	2.983		44	169.695	10.305		44	176.386	3.614		44	91.79	88.21		44	155.737	24.263		44	178.668	1.332		44	134.624	45.376		44	173.606	6.394			20.0661	27.6218	8.73479
		144	45	178.919	1.081		45	162.897	17.103		45	177.017	2.983		45	169.695	10.305		45	176.386	3.614		45	91.79	88.21		45	155.737	24.263		45	178.668	1.332		45	143.443	36.557		45	173.606	6.394			19.1842	26.8541	8.492
		147	46	178.919	1.081		46	162.897	17.103		46	177.017	2.983		46	169.526	10.474		46	176.386	3.614		46	91.79	88.21		46	155.737	24.263		46	178.668	1.332		46	143.443	36.557		46	173.606	6.394			19.2011	26.8479	8.49005
		150	47	178.919	1.081		47	162.897	17.103		47	177.017	2.983		47	169.695	10.305		47	176.386	3.614		47	91.79	88.21		47	155.737	24.263		47	178.668	1.332		47	143.443	36.557		47	173.606	6.394			19.1842	26.8541	8.492
		153	48	178.919	1.081		48	162.897	17.103		48	177.017	2.983		48	169.695	10.305		48	176.386	3.614		48	91.79	88.21		48	155.737	24.263		48	178.668	1.332		48	126.482	53.518		48	173.606	6.394			20.8803	28.555	9.02989
		156	49	178.919	1.081		49	162.897	17.103		49	177.017	2.983		49	169.695	10.305		49	176.386	3.614		49	99.828	80.172		49	155.737	24.263		49	178.668	1.332		49	136.219	43.781		49	173.606	6.394			19.1028	25.2726	7.9919
		159	50	178.759	1.241		50	162.897	17.103		50	177.017	2.983		50	169.695	10.305		50	176.386	3.614		50	99.828	80.172		50	155.737	24.263		50	178.668	1.332		50	136.219	43.781		50	173.606	6.394			19.1188	25.26	7.9879
		162	51	178.759	1.241		51	162.897	17.103		51	177.017	2.983		51	169.526	10.474		51	176.386	3.614		51	99.828	80.172		51	155.737	24.263		51	178.668	1.332		51	136.219	43.781		51	173.606	6.394			19.1357	25.2535	7.98585
																							52	99.828	80.172		52	155.737	24.263		52	178.668	1.332		52	136.219	43.781		52	173.606	6.394			31.1884	32.0628	10.1392
